# Supplementary material for: Towards 20,20-difluorinated bryostatin: synthesis and biological evaluation of C17,C27-fragments
Source: Royal Society of Chemistry journal article supplement (doi:10.1039/c8ob03152e), 2019-01-01

## **Towards 20,20-difluorinated bryostatin: synthesis and biological evaluation of difluorinated C17,C27-fragments**

Paul R. Mears, Steven Hoekman, Claire E. Rye, Fiona P. Bailey, Dominic P. Byrne, Patrick A. Eyers and Eric J. Thomas\*

### **Supplementary data**

Copies of all the  $^1\text{H}$ ,  $^{13}\text{C}$  and  $^{19}\text{F}$  NMR spectra reported in this paper with expansions for some of the  $^{13}\text{C}$  spectra to show carbon-fluorine couplings

ejt cry alcohol  
mPROTON CDCl<sub>3</sub> {e:\bruk400data\2012\Mar} ejt 38

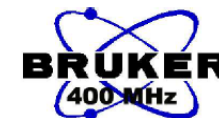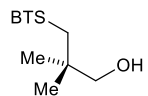

NAME 2012-03-08-ejt-38  
EXPNO 10  
PROCNO 1  
Date\_ 20120308  
Time 11.47  
INSTRUM AV400  
PROBHD 5 mm PABBO BB-  
PULPROG zg30b  
TD 65536  
SOLVENT CDCl<sub>3</sub>  
NS 16  
DS 0  
SWH 8264.463 Hz  
FIDRES 0.126106 Hz  
AQ 3.9649780 sec  
RG 203  
DW 60.500 usec  
DE 9.40 usec  
TE 294.3 K  
D1 1.00000000 sec  
TD0 1

===== CHANNEL f1 =====  
NUC1 1H  
P1 10.00 usec  
PL1 -3.60 dB  
PL1W 17.83863831 W  
SFO1 400.1324710 MHz  
SI 32768  
SF 400.1300379 MHz  
WDW EM  
SSB 0  
LB 0.30 Hz  
GB 0  
PC 1.00

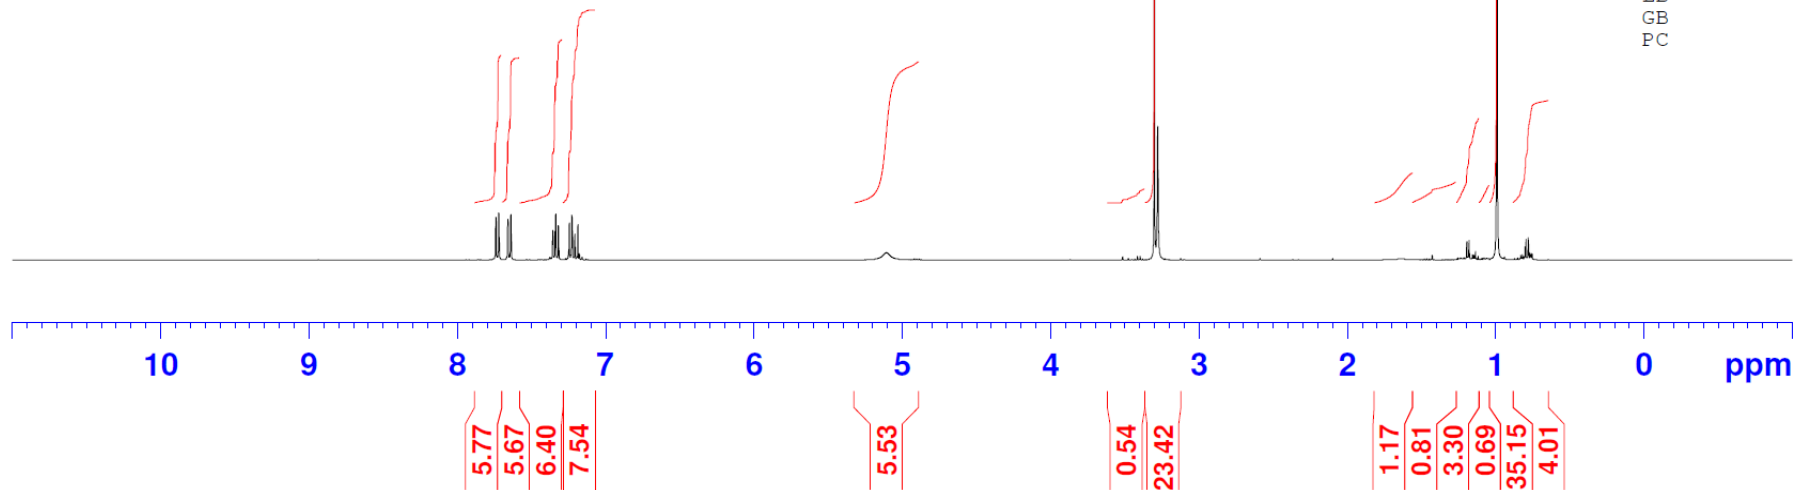

ejt cry alcohol  
mCARBONnight CDCl<sub>3</sub> {e:\bruk400data\2012\Mar} ejt 12

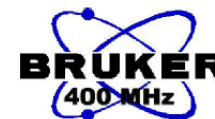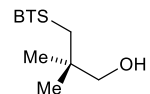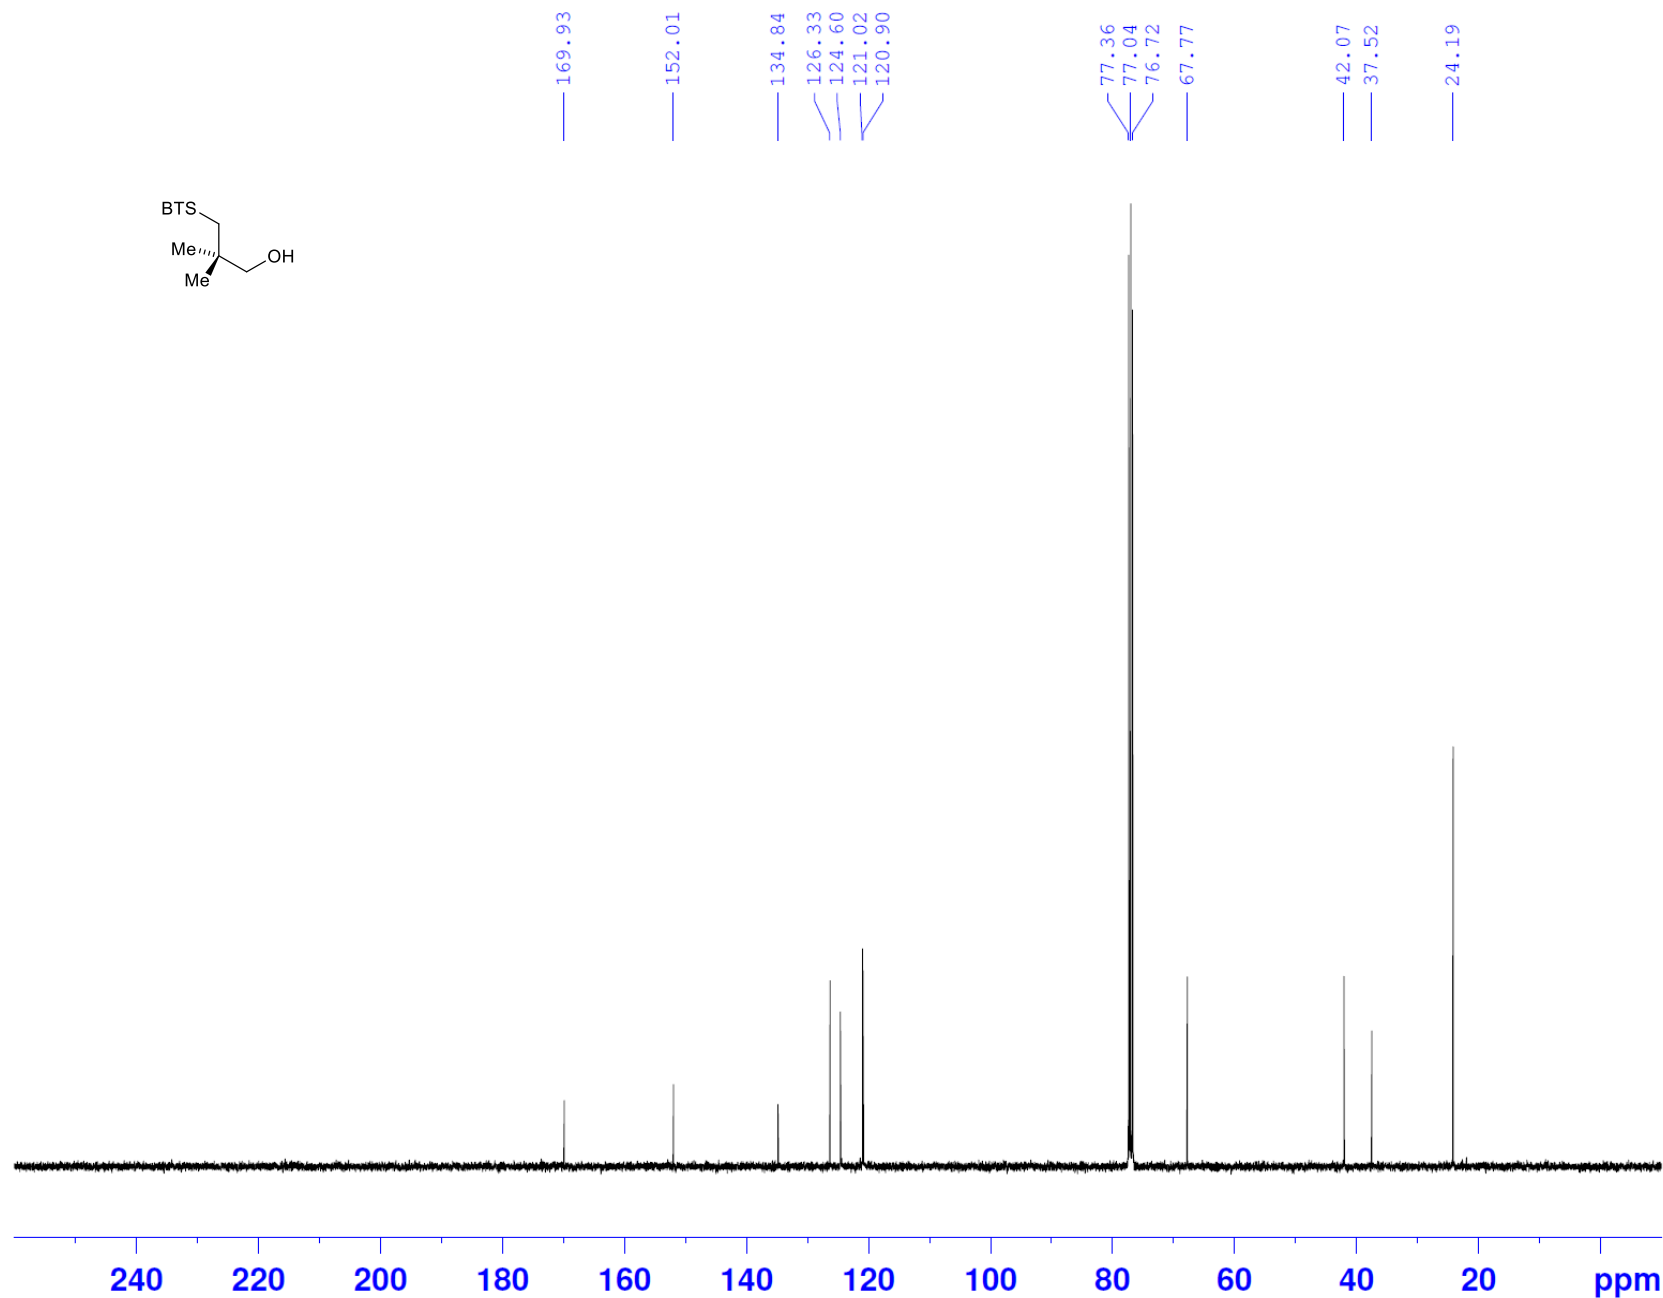

NAME 2012-03-12-ejt-12  
EXPNO 10  
PROCNO 1  
Date\_ 20120312  
Time 20.20  
INSTRUM AV400  
PROBHD 5 mm PABBO BB-  
PULPROG zgpg30  
TD 65536  
SOLVENT CDCl<sub>3</sub>  
NS 1024  
DS 2  
SWH 30241.936 Hz  
FIDRES 0.461455 Hz  
AQ 1.0835786 sec  
RG 512  
DW 16.533 usec  
DE 7.83 usec  
TE 295.5 K  
D1 2.00000000 sec  
D11 0.03000000 sec  
TD0 1

===== CHANNEL f1 =====  
NUC1 13C  
P1 8.00 usec  
PL1 0.00 dB  
PL1W 34.91522217 W  
SFO1 100.6241042 MHz

===== CHANNEL f2 =====  
CPDPRG2 waltz16  
NUC2 1H  
PCPD2 90.00 usec  
PL2 -3.60 dB  
PL12 15.31 dB  
PL13 18.00 dB  
PL2W 17.83863831 W  
PL12W 0.22927761 W  
PL13W 0.12341322 W  
SFO2 400.1316005 MHz  
SI 32768  
SF 100.6127690 MHz  
WDW EM  
SSB 0  
LB 1.00 Hz  
GB 0  
PC 1.40

ejt cry swern  
mPROTON CDCl3 {e:\bruk400data\2012\May} ejt 17

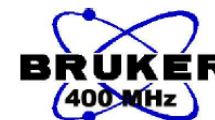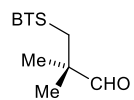

(8)

NAME 2012-05-11-ejt-17  
EXPNO 10  
PROCNO 1  
Date\_ 20120511  
Time 9.54  
INSTRUM AV400  
PROBHD 5 mm PABBO BB-  
PULPROG zg30b  
TD 65536  
SOLVENT CDCl3  
NS 16  
DS 0  
SWH 8264.463 Hz  
FIDRES 0.126106 Hz  
AQ 3.9649780 sec  
RG 287  
DW 60.500 usec  
DE 9.40 usec  
TE 293.3 K  
D1 1.00000000 sec  
TD0 1

===== CHANNEL f1 =====  
NUC1 1H  
P1 10.00 usec  
PL1 -3.60 dB  
PL1W 17.83863831 W  
SFO1 400.1324710 MHz  
SI 32768  
SF 400.1300000 MHz  
WDW EM  
SSB 0  
LB 0.30 Hz  
GB 0  
PC 1.00

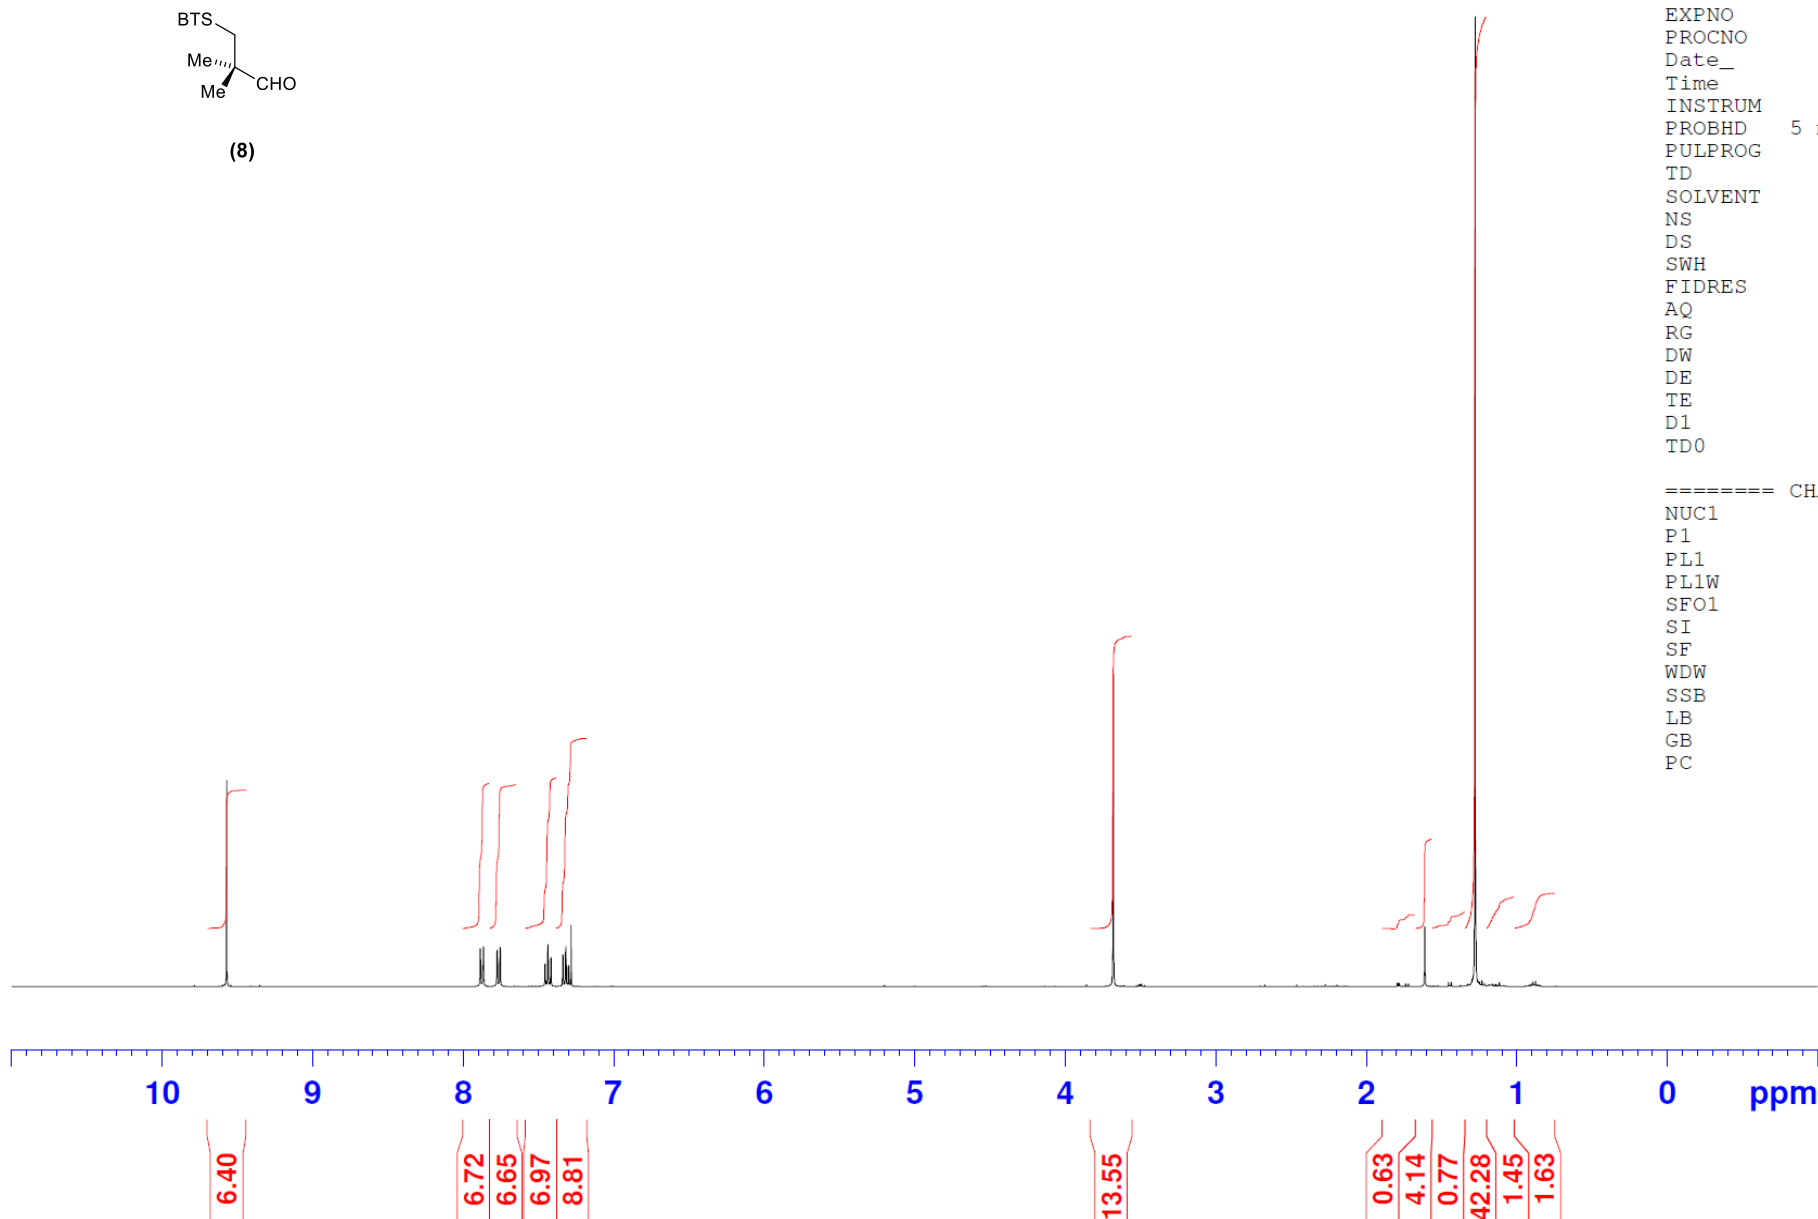



ejt cry ald  
mCARBONnight CDCl<sub>3</sub> {e:\bruk400data\2012\Feb} ejt 38

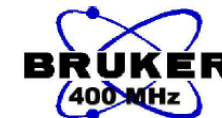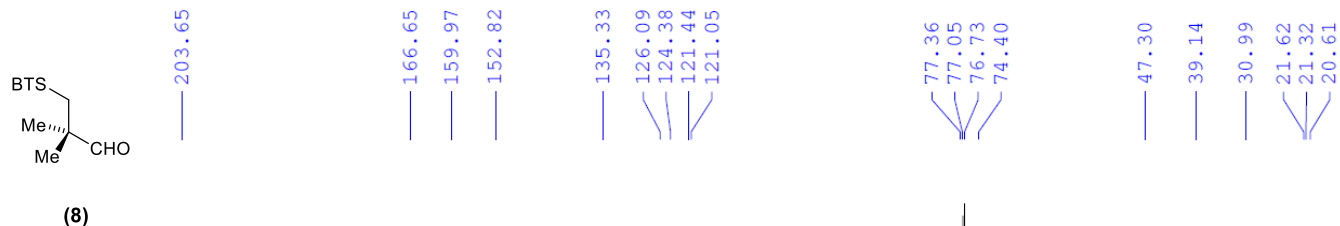

NAME 2012-02-08-ejt-38  
EXPNO 10  
PROCNO 1  
Date\_ 20120208  
Time 23.37  
INSTRUM AV400  
PROBHD 5 mm PABBO BB-  
PULPROG zgpg30  
TD 65536  
SOLVENT CDCl<sub>3</sub>  
NS 1000  
DS 2  
SWH 30241.936 Hz  
FIDRES 0.461455 Hz  
AQ 1.0835786 sec  
RG 512  
DW 16.533 usec  
DE 7.83 usec  
TE 292.4 K  
D1 2.00000000 sec  
D11 0.03000000 sec  
TD0 1

===== CHANNEL f1 =====  
NUC1 13C  
P1 8.00 usec  
PL1 0.00 dB  
PL1W 34.9152217 W  
SFO1 100.6241042 MHz

===== CHANNEL f2 =====  
CPDPRG2 waltz16  
NUC2 1H  
PCPD2 90.00 usec  
PL2 -3.60 dB  
PL12 15.31 dB  
PL13 18.00 dB  
PL2W 17.83863831 W  
PL12W 0.22927761 W  
PL13W 0.12341322 W  
SFO2 400.1316005 MHz  
SI 32768  
SF 100.6127690 MHz  
WDW EM  
SSB 0  
LB 1.00 Hz  
GB 0  
PC 1.40

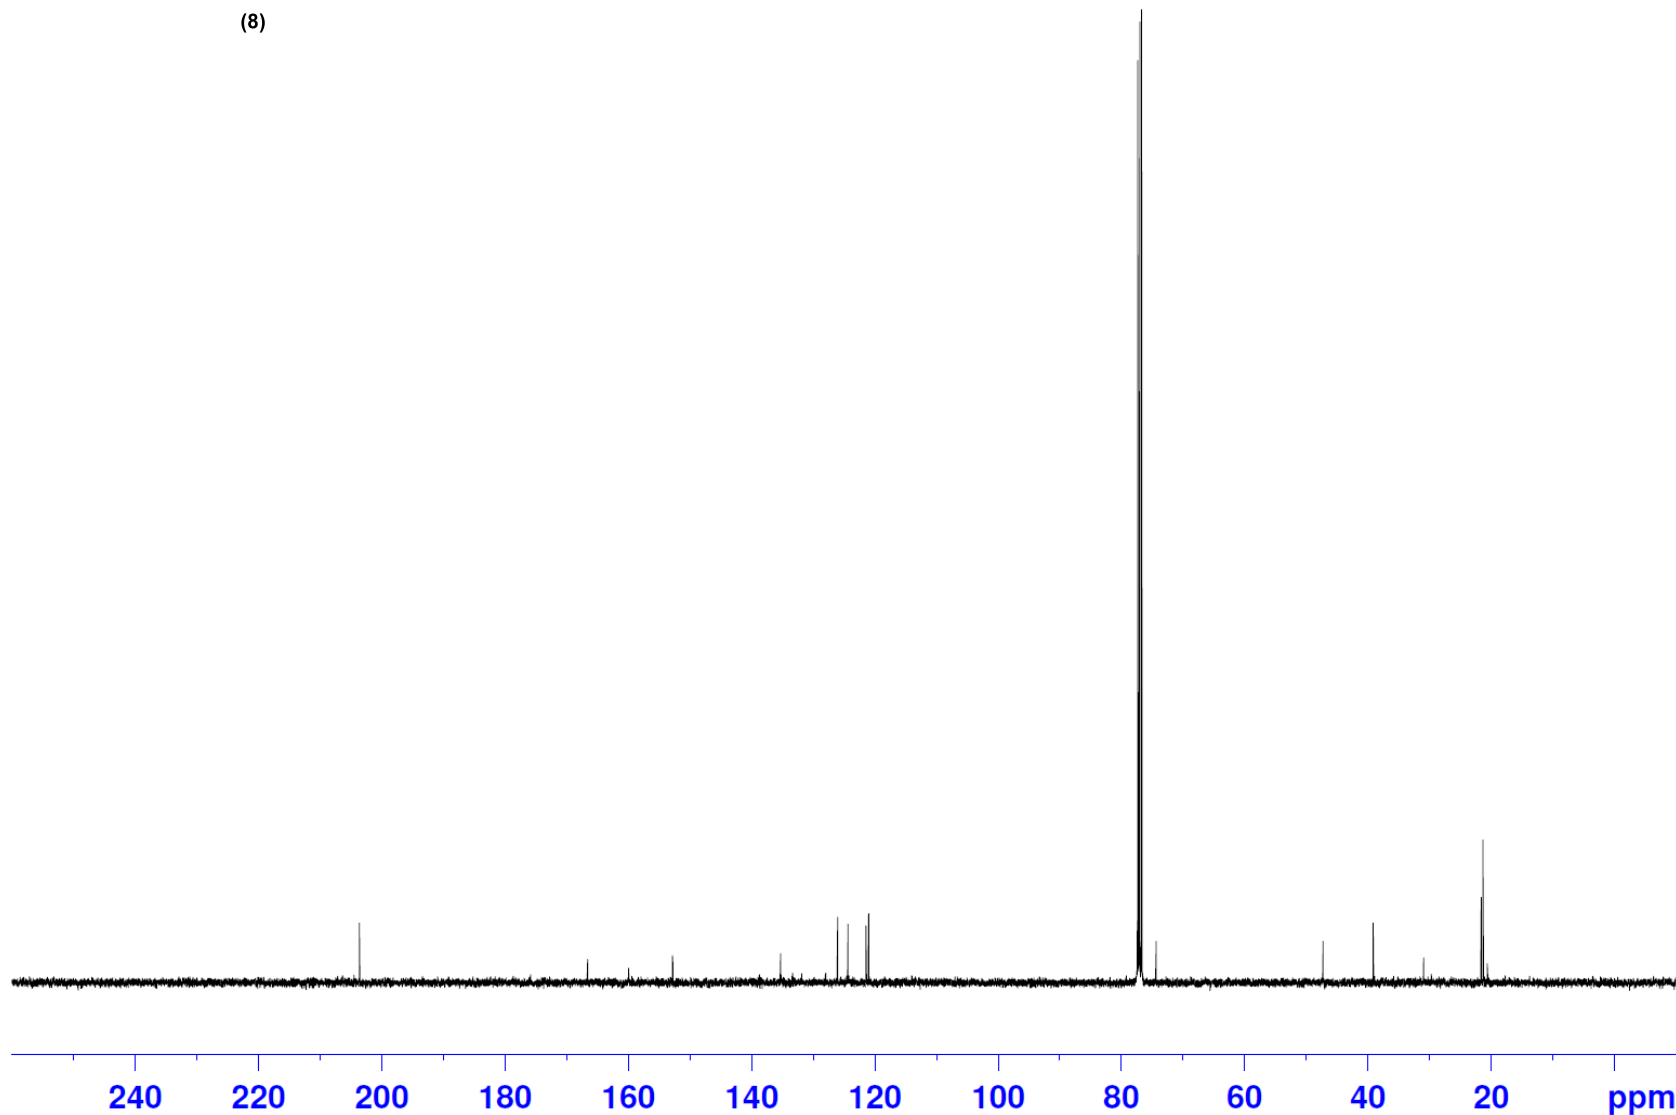

ejt cry bom oh  
mPROTON CDCl3 {e:\bruk400data\2012\Aug} ejt 16

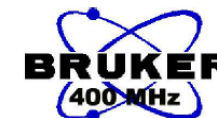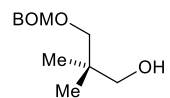

NAME 2012-08-07-ejt-16  
EXPNO 10  
PROCNO 1  
Date\_ 20120807  
Time 16.08  
INSTRUM AV400  
PROBHD 5 mm PABBO BB-  
PULPROG zg30b  
TD 65536  
SOLVENT CDCl3  
NS 16  
DS 0  
SWH 8264.463 Hz  
FIDRES 0.126106 Hz  
AQ 3.9649780 sec  
RG 287  
DW 60.500 usec  
DE 9.40 usec  
TE 295.2 K  
D1 1.00000000 sec  
TD0 1

===== CHANNEL f1 =====  
NUC1 1H  
P1 10.00 usec  
PL1 -3.60 dB  
PL1W 17.83863831 W  
SFO1 400.1324710 MHz  
SI 32768  
SF 400.1300790 MHz  
WDW EM  
SSB 0  
LB 0.30 Hz  
GB 0  
PC 1.00

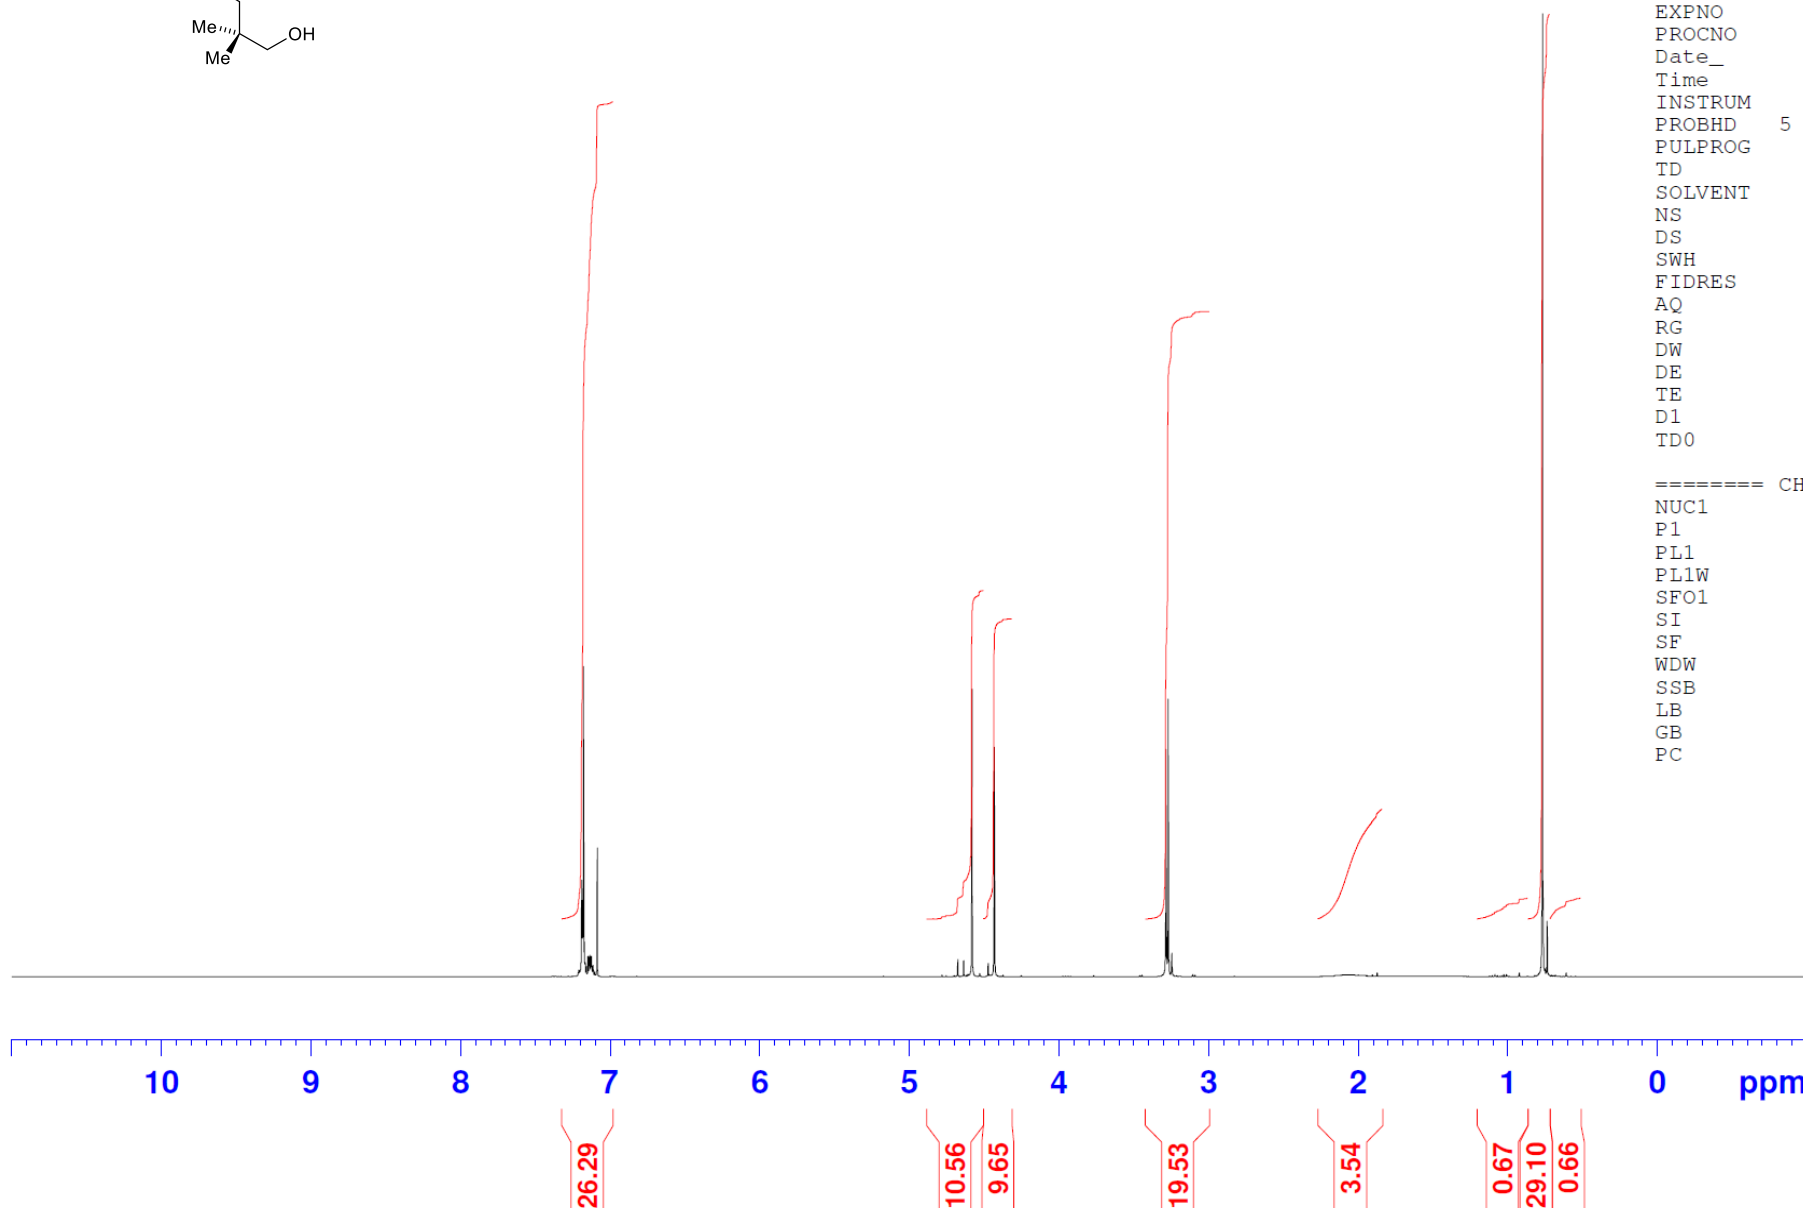

ejt cry bom prot  
mCARBONnight CDC13 /opt/bruk500data/2012/May ejt 2

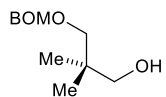

137.63  
128.51  
128.48  
127.92  
127.88  
127.84  
127.78  
94.93  
91.55  
91.28  
77.61  
77.29  
77.04  
76.79  
76.48  
71.09  
69.90  
69.57  
36.09  
21.82

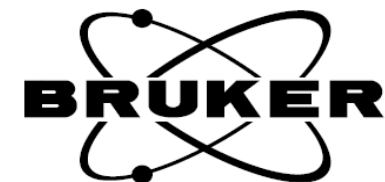

NAME 2012-05-30-ejt-2  
EXPNO 20  
PROCNO 1  
Date\_ 20120530  
Time 18.48  
INSTRUM spect  
PROBHD 5 mm PABBO BB-  
PULPROG zgpg30  
TD 65536  
SOLVENT CDC13  
NS 800  
DS 2  
SWH 29761.904 Hz  
FIDRES 0.454131 Hz  
AQ 1.1010548 sec  
RG 512  
DW 16.800 usec  
DE 32.78 usec  
TE 293.0 K  
D1 2.00000000 sec  
D11 0.03000000 sec  
TD0 1

===== CHANNEL f1 =====  
NUC1 13C  
P1 8.80 usec  
PL1 -1.00 dB  
PL1W 104.35516357 W  
SFO1 125.7703643 MHz

===== CHANNEL f2 =====  
CPDPRG2 waltz16  
NUC2 1H  
PCPD2 80.00 usec  
PL2 0.00 dB  
PL12 17.23 dB  
PL13 120.00 dB  
PL2W 25.62124252 W  
PL12W 0.48484197 W  
PL13W 0.00000000 W  
SFO2 500.1320005 MHz  
SI 32768  
SF 125.7577890 MHz  
WDW EM  
SSB 0  
LB 1.00 Hz  
GB 0  
PC 1.40

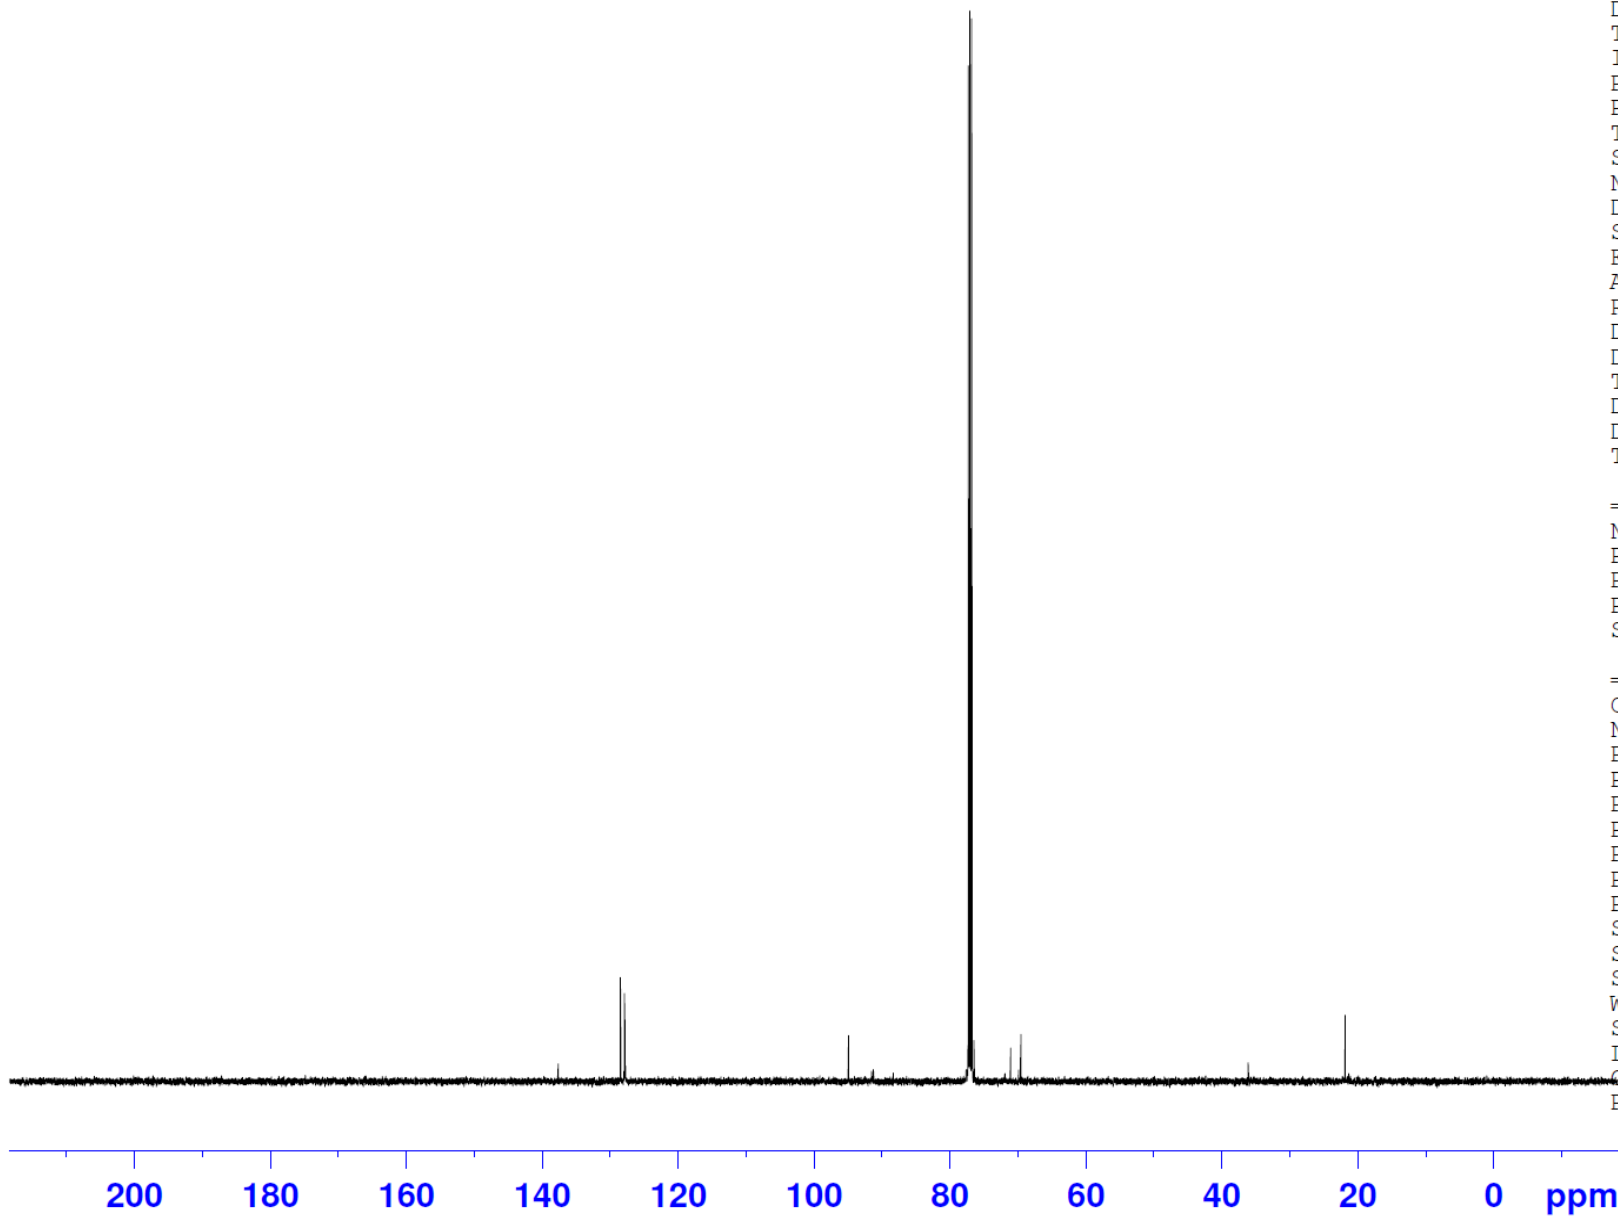

ejt cry bom ald  
mPROTON CDCl3 {e:\bruk400data\2012\Aug} ejt 15

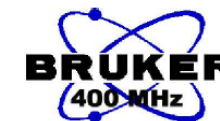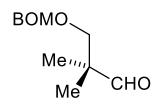

(9)

NAME 2012-08-08-ejt-15  
EXPNO 10  
PROCNO 1  
Date\_ 20120808  
Time 15.31  
INSTRUM AV400  
PROBHD 5 mm PABBO BB-  
PULPROG zg30b  
TD 65536  
SOLVENT CDCl3  
NS 16  
DS 0  
SWH 8264.463 Hz  
FIDRES 0.126106 Hz  
AQ 3.9649780 sec  
RG 256  
DW 60.500 usec  
DE 9.40 usec  
TE 295.5 K  
D1 1.00000000 sec  
TD0 1

===== CHANNEL f1 =====  
NUC1 1H  
P1 10.00 usec  
PL1 -3.60 dB  
PL1W 17.83863831 W  
SFO1 400.1324710 MHz  
SI 32768  
SF 400.1300387 MHz  
WDW EM  
SSB 0  
LB 0.30 Hz  
GB 0  
PC 1.00

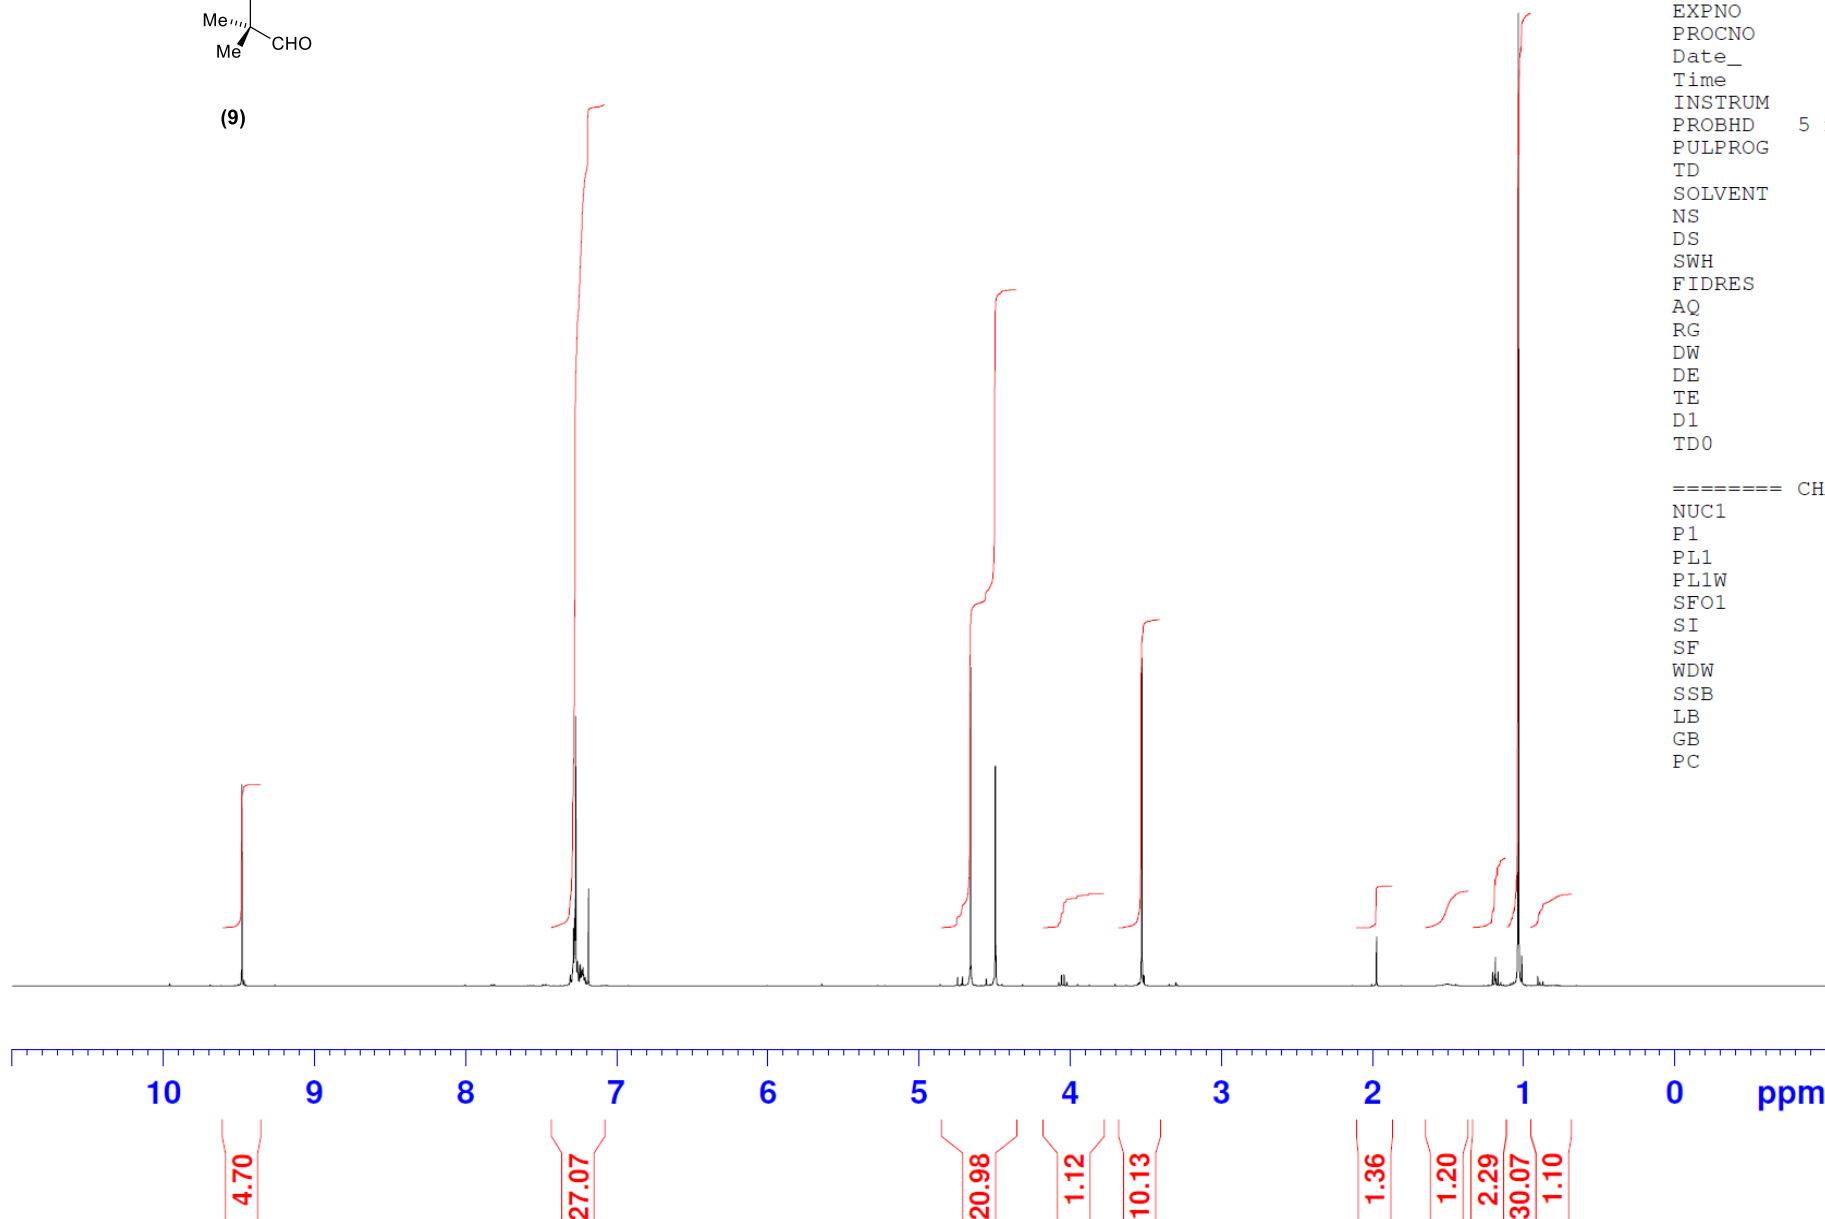

ejt cry swern  
mCARBONnight CDCl<sub>3</sub> {e:\bruk400data\2012\May} ejt 31

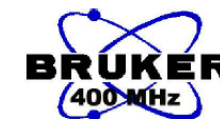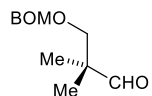

(9)

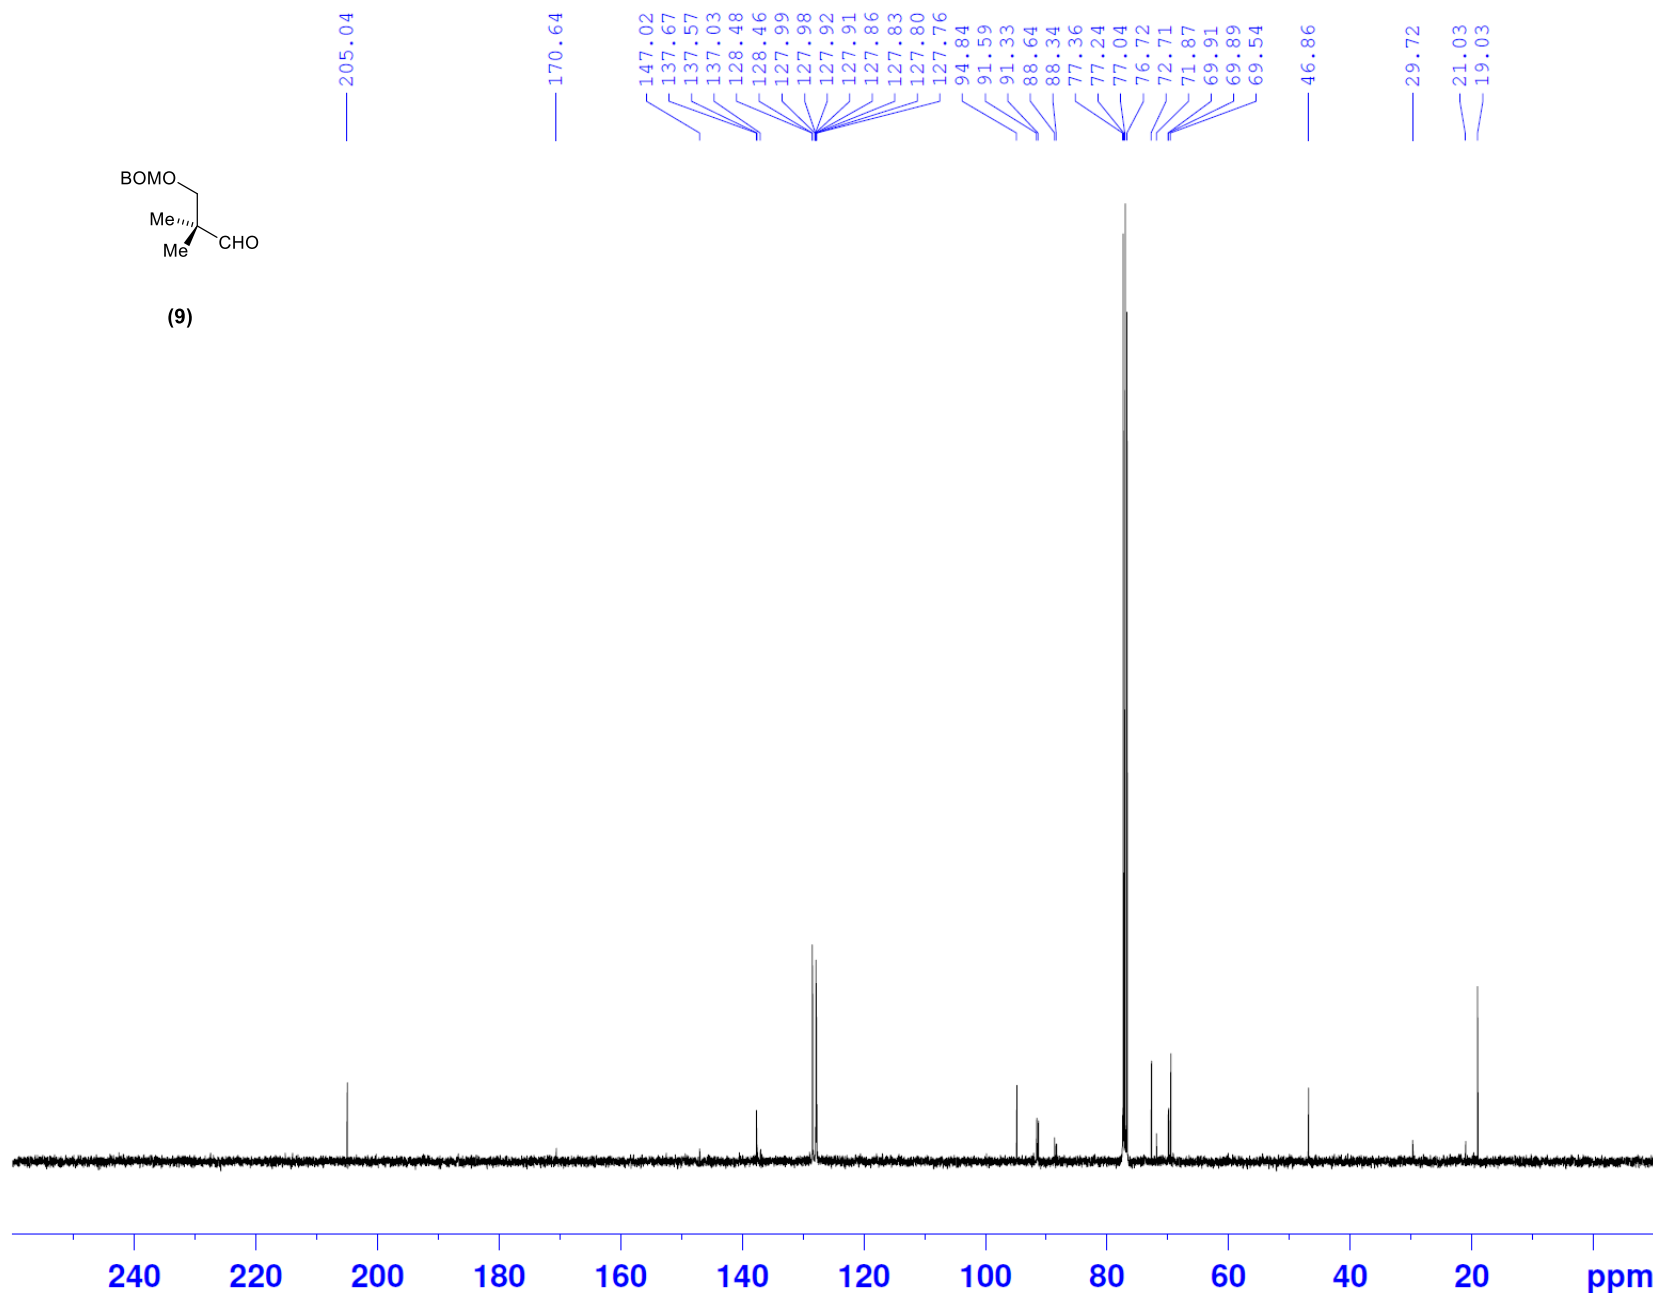

NAME 2012-05-31-ejt-31  
EXPNO 11  
PROCNO 1  
Date\_ 20120601  
Time 1.04  
INSTRUM AV400  
PROBHD 5 mm PABBO BB-  
PULPROG zgpg30  
TD 65536  
SOLVENT CDCl<sub>3</sub>  
NS 800  
DS 2  
SWH 30241.936 Hz  
FIDRES 0.461455 Hz  
AQ 1.0835786 sec  
RG 512  
DW 16.533 usec  
DE 7.83 usec  
TE 296.2 K  
D1 2.00000000 sec  
D11 0.03000000 sec  
TD0 1

===== CHANNEL f1 =====  
NUC1 13C  
P1 8.00 usec  
PL1 0.00 dB  
PL1W 34.91522217 W  
SFO1 100.6241042 MHz

===== CHANNEL f2 =====  
CPDPRG2 waltz16  
NUC2 1H  
PCPD2 90.00 usec  
PL2 -3.60 dB  
PL12 15.31 dB  
PL13 18.00 dB  
PL2W 17.83863831 W  
PL12W 0.22927761 W  
PL13W 0.12341322 W  
SFO2 400.1316005 MHz  
SI 32768  
SF 100.6127690 MHz  
WDW EM  
SSB 0  
LB 1.00 Hz  
GB 0  
PC 1.40

ejt cry 7-9  
mPROTON CDCl3 {e:\bruk400data\2012\Feb} ejt 16

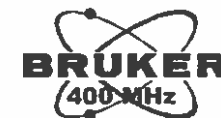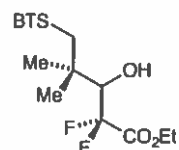

12

NAME 2012-02-06-ejt-16  
EXPNO 10  
PROCNO 1  
Date\_ 20120206  
Time\_ 14.23  
INSTRUM AV400  
PROBHD 5 mm PABBO BB-  
PULPROG zg30b  
TD 65536  
SOLVENT CDCl3  
NS 16  
DS 0  
SWH 8264.463 Hz  
FIDRES 0.126106 Hz  
AQ 3.9649780 sec  
RG 161  
DW 60.500 usec  
DE 9.40 usec  
TE 293.7 K  
D1 1.00000000 sec  
TD0 1

===== CHANNEL f1 =====  
NUC1 1H  
P1 10.00 usec  
PL1 -3.60 dB  
PL1W 17.83863831 W  
SFO1 400.1324710 MHz  
SI 32768  
SF 400.1300376 MHz  
WDW EM  
SSB 0  
LB 0.30 Hz  
GB 0  
PC 1.00

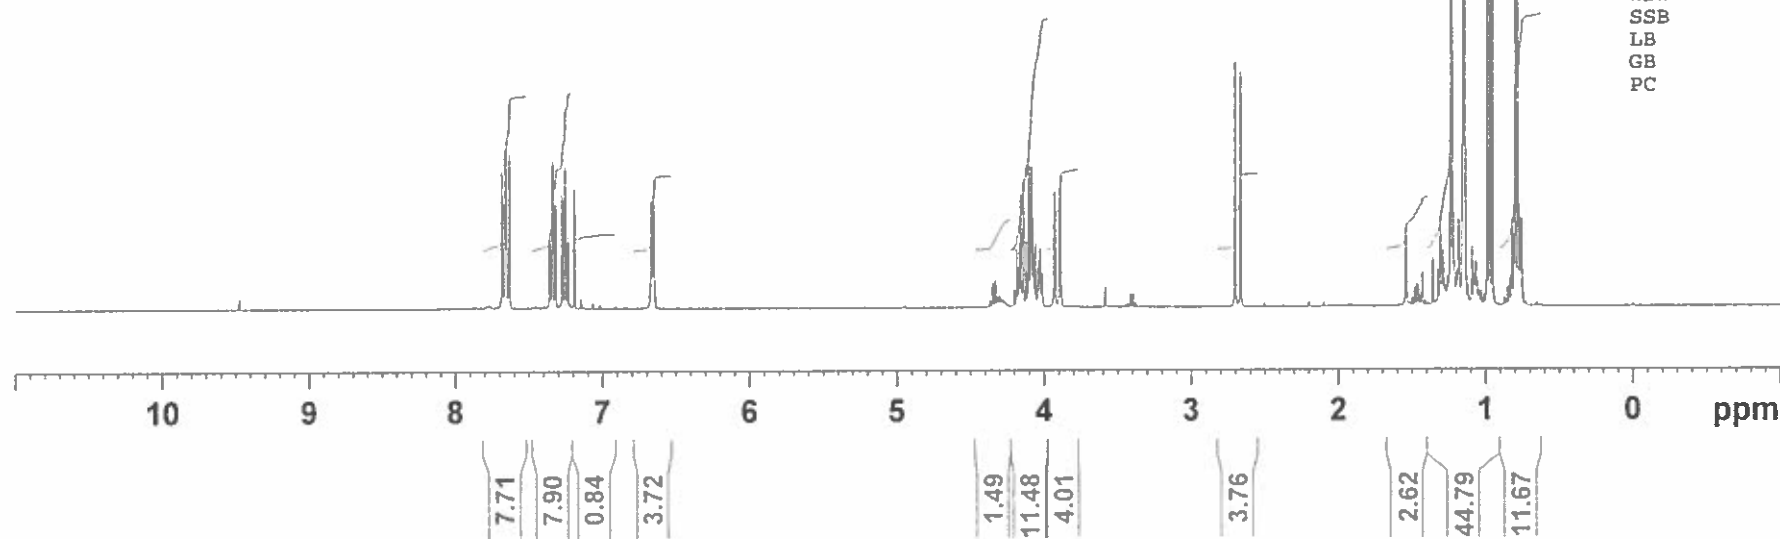

ejt cry 7-9  
mCARBONnight CDCl3 {e:\bruk400data\2012\Feb} ejt 16

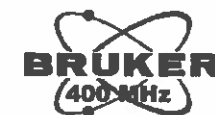

170.38  
164.39  
164.10  
164.05  
163.75  
151.57  
134.71  
126.49  
124.92  
121.21  
120.50  
117.60  
117.49  
114.98  
77.36  
77.05  
76.73  
71.64  
71.42  
71.36  
71.14  
62.52  
46.43  
41.35  
39.65  
36.07  
29.07  
27.68  
22.78  
22.71  
22.64  
21.98  
21.92  
20.46  
19.46  
18.78  
14.35  
13.78  
13.67  
11.46

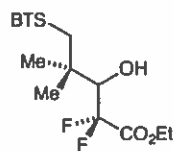

12

NAME 2012-02-06-ejt-16  
EXPNO 12  
PROCNO 1  
Date\_ 20120207  
Time 3.56  
INSTRUM AV400  
PROBHD 5 mm PABBO B9-  
PULPROG zgpg30  
TD 65536  
SOLVENT CDCl3  
NS 1000  
DS 2  
SWH 30241.936 Hz  
FIDRES 0.461455 Hz  
AQ 1.0835786 sec  
RG 512  
DW 16.533 usec  
DE 7.83 usec  
TE 293.2 K  
D1 2.00000000 sec  
D11 0.03000000 sec  
TD0 1

===== CHANNEL f1 =====  
NUC1 13C  
P1 8.00 usec  
PL1 0.00 dB  
PL1W 34.91522217 W  
SFO1 100.6241042 MHz

===== CHANNEL f2 =====  
CPDPRG2 waltz16  
NUC2 1H  
PCPD2 90.00 usec  
PL2 -3.60 dB  
PL12 15.31 dB  
PL13 18.00 dB  
PL2W 17.83863831 W  
PL12W 0.22927761 W  
PL13W 0.12341322 W  
SFO2 400.1316005 MHz  
SI 32768  
SF 100.6127690 MHz  
WDW EM  
SSB 0  
LB 1.00 Hz  
GB 0  
PC 1.40

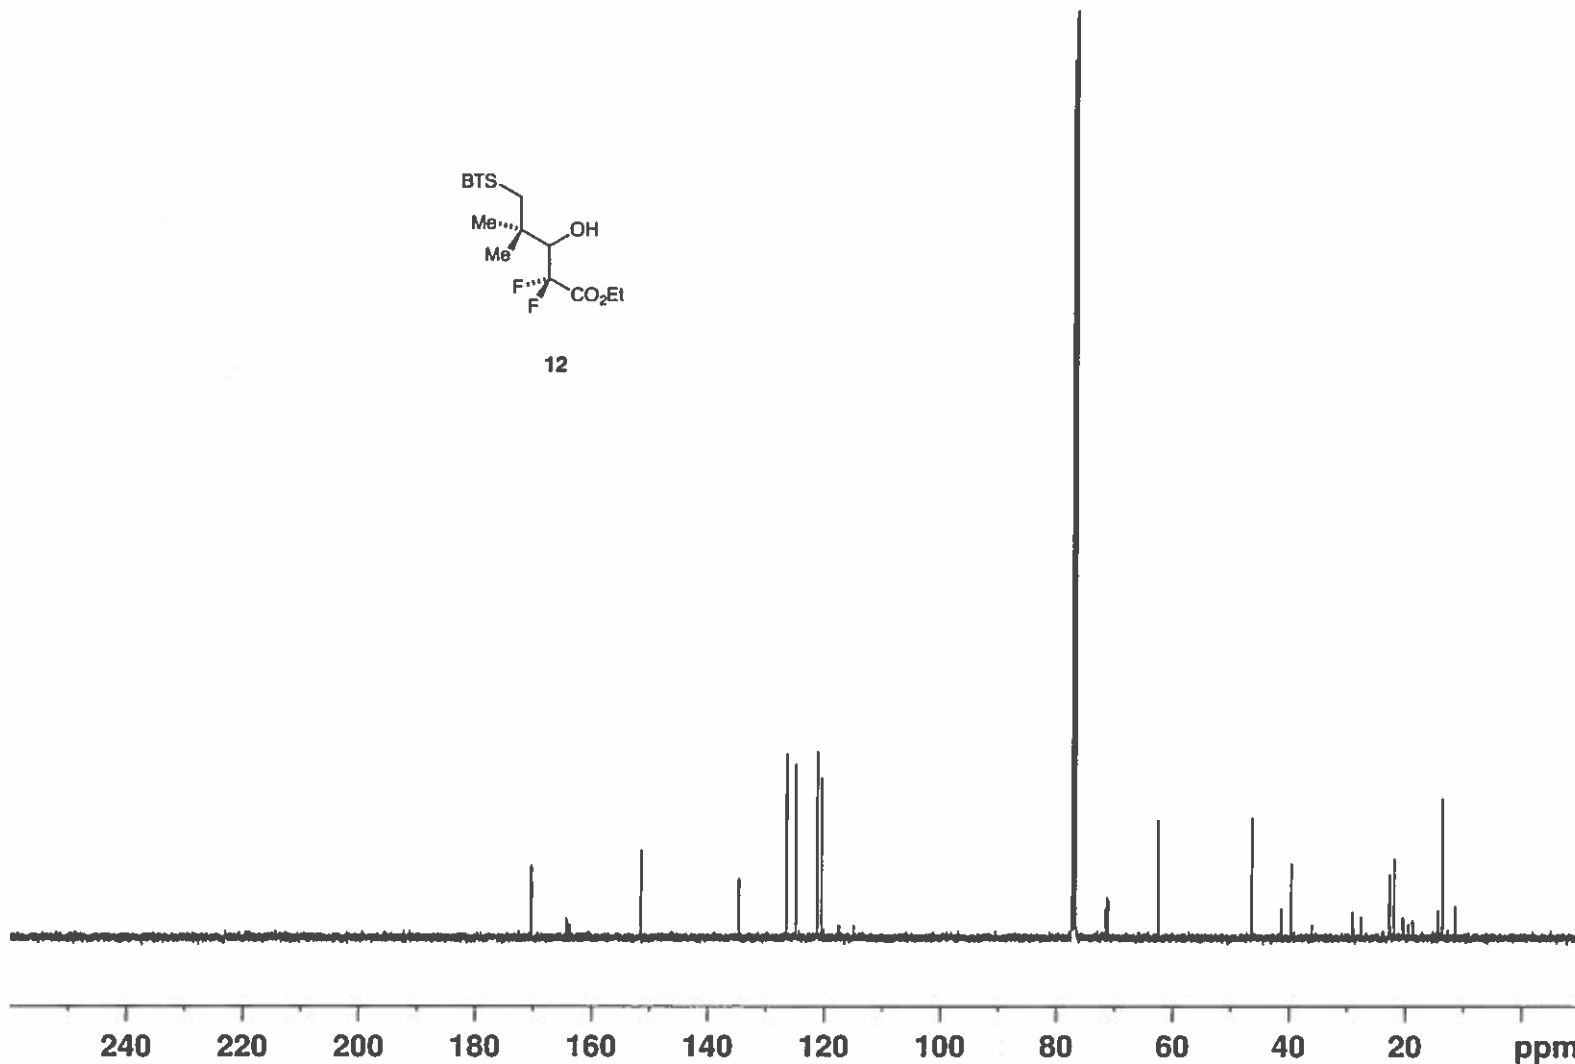

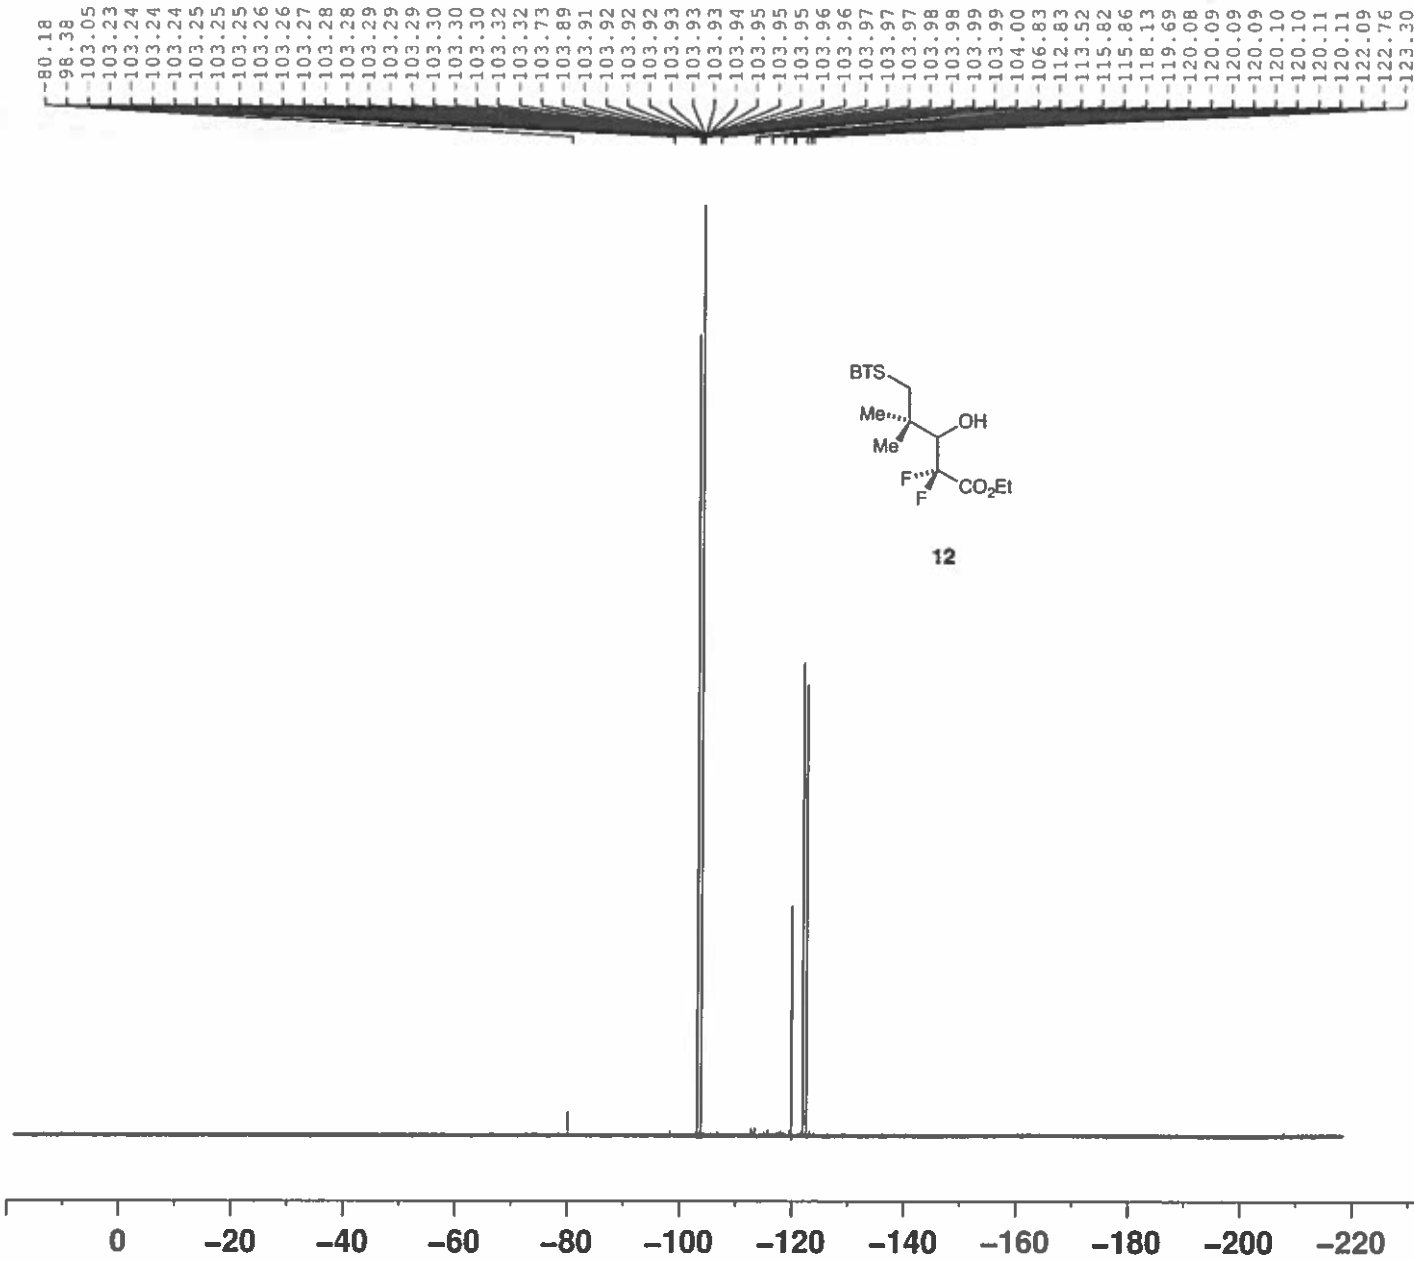



|                        |                                                                                                                           |                   |                                                                  |                        |              |                      |           |
|------------------------|---------------------------------------------------------------------------------------------------------------------------|-------------------|------------------------------------------------------------------|------------------------|--------------|----------------------|-----------|
| Acquisition Time (sec) | 3.1719                                                                                                                    | Comment           | ejt cry tips mPROTONnight CDCl3 /op/bbruk500data/2012/Jun ejt 10 |                        | Date         | 20 Jun 2012 03:46:24 |           |
| Date Stamp             | 20 Jun 2012 03:46:24                                                                                                      |                   |                                                                  |                        |              |                      |           |
| File Name              | \\ss7a.ds.man.ac.uk\vol5\vol3\users\snmrdata\bruk500data\bruk500data\2012\Jun\data\ejt\nmr\2012-06-19-ejt-10\10\data\1\1r |                   |                                                                  |                        |              |                      |           |
| Frequency (MHz)        | 500.13                                                                                                                    | Nucleus           | 1H                                                               | Number of Transients   | 16           | Origin               | spect     |
| Original Points Count  | 32768                                                                                                                     | Owner             | vnmr1                                                            | Points Count           | 32768        | Pulse Sequence       | zg30b     |
| Receiver Gain          | 203.00                                                                                                                    | SW(cyclical) (Hz) | 10330.58                                                         | Solvent                | CHLOROFORM-d | Spectrum Offset (Hz) | 3079.9768 |
| Spectrum Type          | STANDARD                                                                                                                  | Sweep Width (Hz)  | 10330.26                                                         | Temperature (degree C) | 20.001       |                      |           |

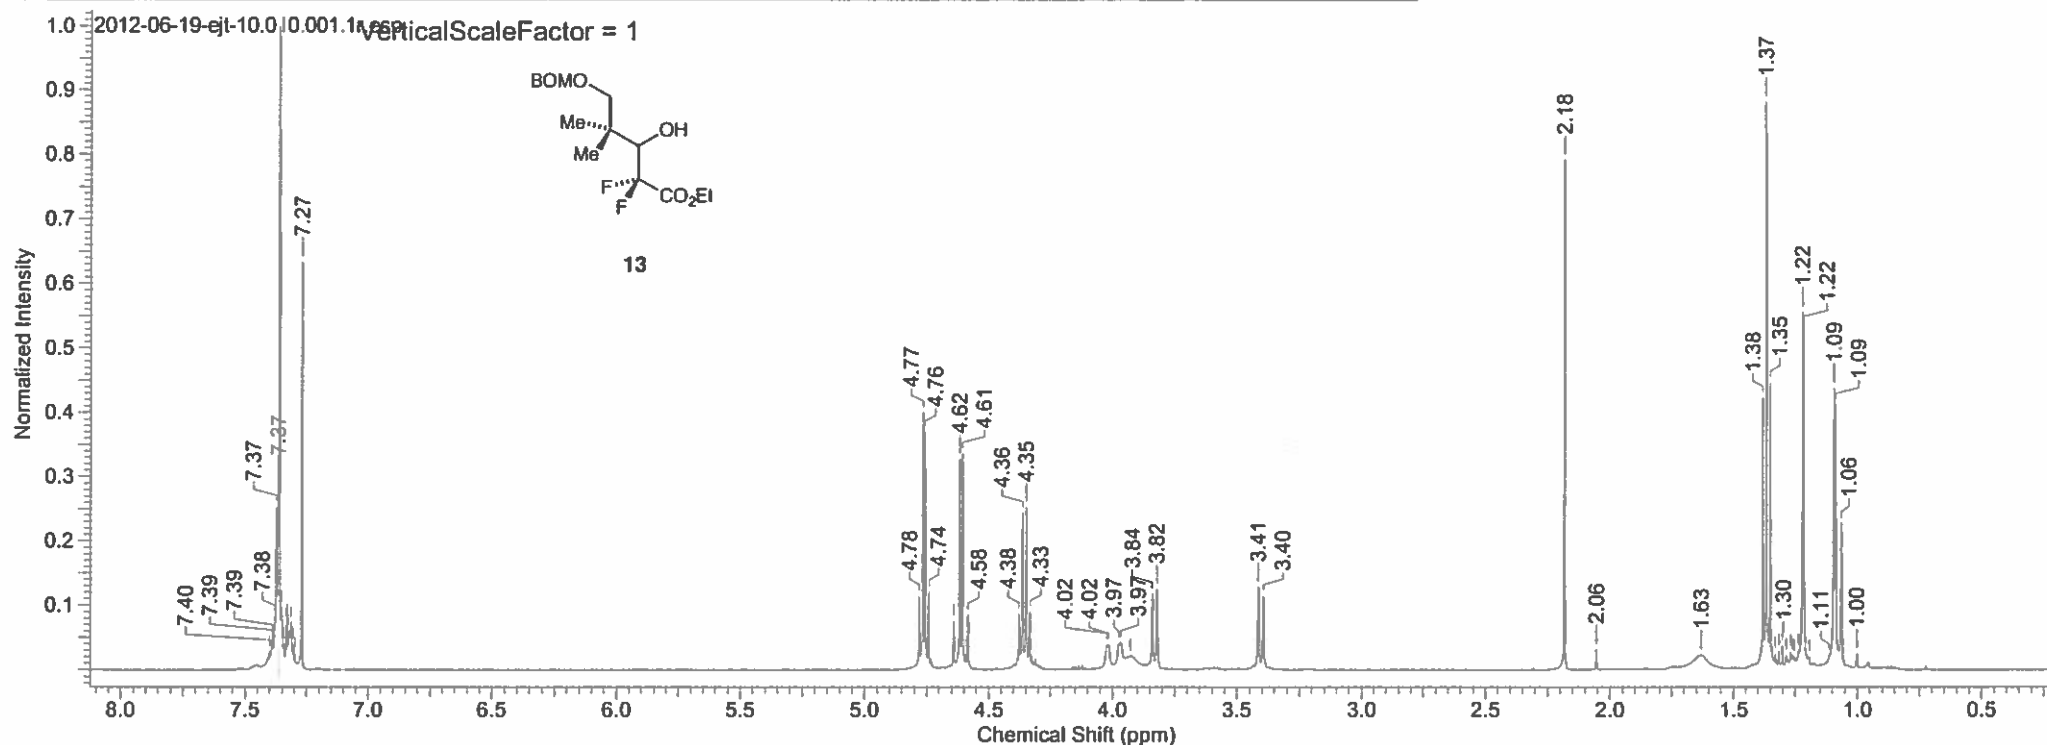

| No. | (ppm) | (Hz)  | Height | No. | (ppm) | (Hz)  | Height | No. | (ppm) | (Hz)   | Height | No. | (ppm) | (Hz)   | Height |
|-----|-------|-------|--------|-----|-------|-------|--------|-----|-------|--------|--------|-----|-------|--------|--------|
| 1   | 1.00  | 501.0 | 0.0255 | 12  | 1.26  | 630.2 | 0.0225 | 23  | 1.37  | 686.0  | 0.0604 | 34  | 3.97  | 1987.4 | 0.0410 |
| 2   | 1.06  | 531.9 | 0.2281 | 13  | 1.27  | 634.0 | 0.0282 | 24  | 1.38  | 690.1  | 0.4235 | 35  | 4.02  | 2008.6 | 0.0394 |
| 3   | 1.07  | 533.7 | 0.0986 | 14  | 1.29  | 644.1 | 0.0230 | 25  | 1.63  | 815.6  | 0.0229 | 36  | 4.02  | 2012.3 | 0.0387 |
| 4   | 1.09  | 544.5 | 0.4125 | 15  | 1.30  | 651.0 | 0.0371 | 26  | 2.06  | 1028.1 | 0.0322 | 37  | 4.33  | 2163.7 | 0.0224 |
| 5   | 1.09  | 546.7 | 0.4379 | 16  | 1.32  | 658.3 | 0.0293 | 27  | 2.18  | 1091.4 | 0.7925 | 38  | 4.33  | 2167.8 | 0.0898 |
| 6   | 1.11  | 557.4 | 0.0224 | 17  | 1.33  | 665.2 | 0.0251 | 28  | 3.40  | 1698.0 | 0.1140 | 39  | 4.34  | 2170.6 | 0.0238 |
| 7   | 1.20  | 597.7 | 0.0200 | 18  | 1.34  | 672.5 | 0.0356 | 29  | 3.41  | 1707.8 | 0.1283 | 40  | 4.35  | 2175.0 | 0.2529 |
| 8   | 1.22  | 608.5 | 0.5317 | 19  | 1.35  | 673.4 | 0.0364 | 30  | 3.82  | 1910.8 | 0.1254 | 41  | 4.36  | 2182.3 | 0.2438 |
| 9   | 1.22  | 609.7 | 0.5571 | 20  | 1.35  | 675.9 | 0.4465 | 31  | 3.84  | 1920.3 | 0.1186 | 42  | 4.37  | 2186.0 | 0.0262 |
| 10  | 1.24  | 618.6 | 0.0300 | 21  | 1.36  | 679.4 | 0.0452 | 32  | 3.93  | 1964.7 | 0.0215 | 43  | 4.38  | 2189.2 | 0.0866 |
| 11  | 1.25  | 627.1 | 0.0214 | 22  | 1.37  | 683.2 | 0.8827 | 33  | 3.97  | 1983.6 | 0.0433 | 44  | 4.58  | 2292.3 | 0.0859 |
|     |       |       |        |     |       |       |        |     |       |        |        | 45  | 4.59  | 2297.3 | 0.0249 |
|     |       |       |        |     |       |       |        |     |       |        |        | 46  | 4.61  | 2304.0 | 0.3359 |
|     |       |       |        |     |       |       |        |     |       |        |        | 47  | 4.62  | 2309.9 | 0.3286 |
|     |       |       |        |     |       |       |        |     |       |        |        | 48  | 4.64  | 2321.6 | 0.0757 |
|     |       |       |        |     |       |       |        |     |       |        |        | 49  | 4.74  | 2372.4 | 0.1213 |
|     |       |       |        |     |       |       |        |     |       |        |        | 50  | 4.75  | 2376.1 | 0.0240 |
|     |       |       |        |     |       |       |        |     |       |        |        | 51  | 4.76  | 2379.3 | 0.3702 |
|     |       |       |        |     |       |       |        |     |       |        |        | 52  | 4.77  | 2384.0 | 0.4005 |
|     |       |       |        |     |       |       |        |     |       |        |        | 53  | 4.78  | 2391.0 | 0.1141 |
|     |       |       |        |     |       |       |        |     |       |        |        | 54  | 7.27  | 3635.9 | 0.6329 |
|     |       |       |        |     |       |       |        |     |       |        |        | 55  | 7.30  | 3650.1 | 0.0243 |

ejt cry tips

mCARBONnight CDC13 /opt/bruk500data/2012/Jun ejt 10

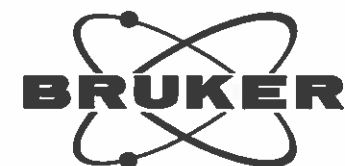

NAME 2012-06-19-ejt-10  
EXPNO 11  
PROCNO 1  
Date\_ 20120620  
Time 4.39  
INSTRUM spect  
PROBHD 5 mm PABBO BB-  
PULPROG zgpg30  
TD 65536  
SOLVENT CDC13  
NS 1000  
DS 2  
SWH 29761.904 Hz  
FIDRES 0.454131 Hz  
AQ 1.1010548 sec  
RG 512  
DW 16.800 usec  
DE 32.78 usec  
TE 293.0 K  
D1 2.00000000 sec  
D11 0.03000000 sec  
TD0 1

===== CHANNEL f1 =====  
NUC1 13C  
P1 8.80 usec  
PL1 -1.00 dB  
PL1W 104.35516357 W  
SFO1 125.7703643 MHz

===== CHANNEL f2 =====  
CPDPRG2 waltz16  
NUC2 1H  
PCPD2 80.00 usec  
PL2 0.00 dB  
PL12 17.23 dB  
PL13 120.00 dB  
PL2W 25.62124252 W  
PL12W 0.48484197 W  
PL13W 0.00000000 W  
SFO2 500.1320005 MHz  
SI 32768  
SF 125.7577890 MHz  
WDW EM  
SSB 0  
LB 1.00 Hz  
GB 0  
PC 1.40

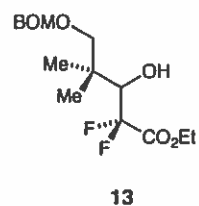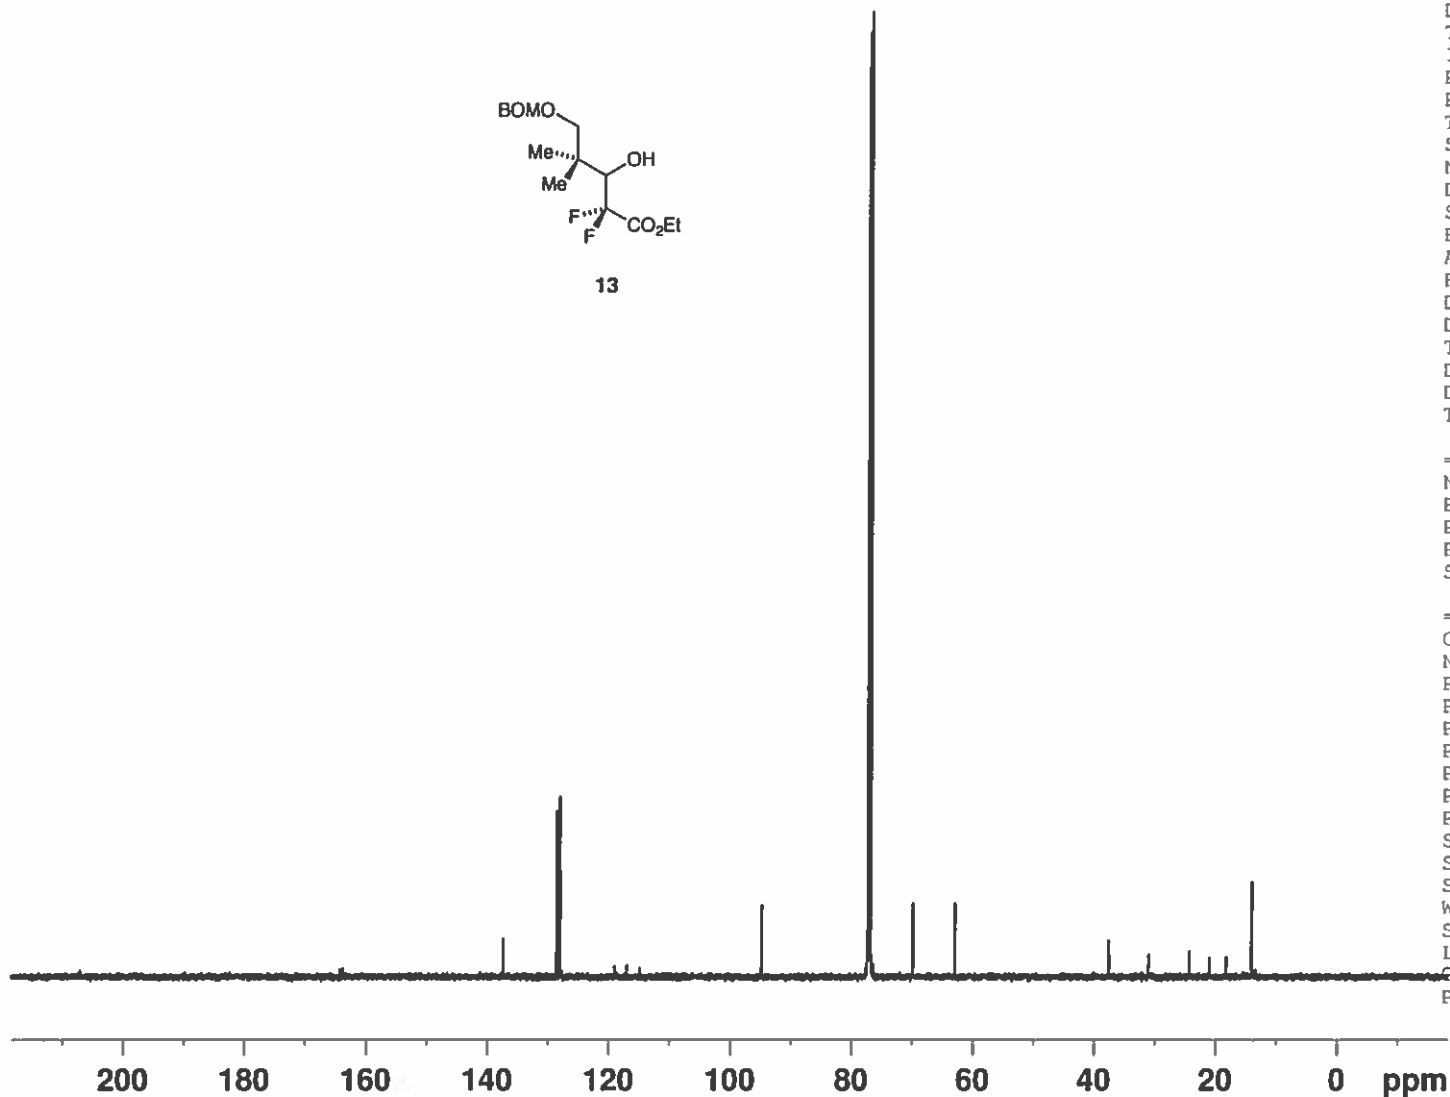

ejt cry zinc 2-6  
mF19CPD CDCl3 {e:\bruk400data\2012\Jun} ejt 39

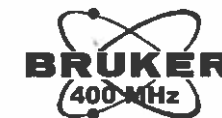

-100.91  
-101.70  
-105.59  
-106.27  
-111.79  
-112.58  
-114.25  
-120.07  
-120.09  
-120.10  
-120.10  
-120.11  
-120.11  
-120.12  
-120.12  
-120.12  
-120.13  
-120.13  
-120.13  
-120.14  
-120.14  
-120.14  
-120.15  
-120.15  
-120.16  
-120.16  
-120.16  
-120.17  
-124.23  
-124.91  
-126.46  
-126.60

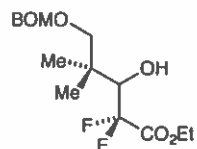

13

NAME 2012-06-11-ejt-39  
EXPNO 11  
PROCNO 1  
Date 20120611  
Time 12.34  
INSTRUM AV400  
PROBHD 5 mm PABBO BB-  
PULPROG zgig  
TD 131072  
SOLVENT CDCl3  
NS 16  
DS 4  
SWH 89285.711 Hz  
FIDRES 0.681196 Hz  
AQ 0.7340532 sec  
RG 4100  
DW 5.600 usec  
DE 7.51 usec  
TE 293.7 K  
D1 1.00000000 sec  
D11 0.03000000 sec  
TD0 1

===== CHANNEL f1 =====  
NUC1 19F  
P1 10.70 usec  
PL1 -5.00 dB  
PL1W 27.00716019 W  
SFO1 376.4607164 MHz

===== CHANNEL f2 =====  
CPDPRG2 waltz16  
NUC2 1H  
PCPD2 90.00 usec  
PL2 -3.60 dB  
PL12 15.31 dB  
PL2W 17.83863831 W  
PL12W 0.22927761 W  
SFO2 400.1316005 MHz  
SI 262144  
SF 376.4983660 MHz  
WDW EM  
SSB 0  
LB 0.30 Hz  
GB 0  
PC 2.00

0 -20 -40 -60 -80 -100 -120 -140 -160 -180 -200 -220 ppm

|                        |                                                                                                                |                                                                                  |              |                      |           |
|------------------------|----------------------------------------------------------------------------------------------------------------|----------------------------------------------------------------------------------|--------------|----------------------|-----------|
| Acquisition Time (sec) | 3.9649                                                                                                         | Comment ejt cry zinc product mPROTONnight CDCl3 (e:\bruk400data\2012\Sep)\ejt 37 |              |                      |           |
| Date                   | 25 Sep 2012 08:06:40                                                                                           | Date Stamp                                                                       |              | 25 Sep 2012 08:06:40 |           |
| File Name              | \\ss7a.ds.man.ac.uk\vol5\vol3\users\snmrdata\bruk400data\2012\Sep\data\ejt\nmr\2012-09-24-ejt-37\21\data\11\1r |                                                                                  |              | Frequency (MHz)      | 400.13    |
| Nucleus                | 1H                                                                                                             | Number of Transients                                                             | 16           | Origin               | AV400     |
| Owner                  | Administrator                                                                                                  | Points Count                                                                     | 32768        | Pulse Sequence       | zg30b     |
| SW(cyclical) (Hz)      | 8264.46                                                                                                        | Solvent                                                                          | CHLOROFORM-d | Receiver Gain        | 90.50     |
| Sweep Width (Hz)       | 8264.21                                                                                                        | Temperature (degree C)                                                           | 21.100       | Spectrum Offset (Hz) | 2464.9272 |
|                        |                                                                                                                |                                                                                  |              | Spectrum Type        | STANDARD  |

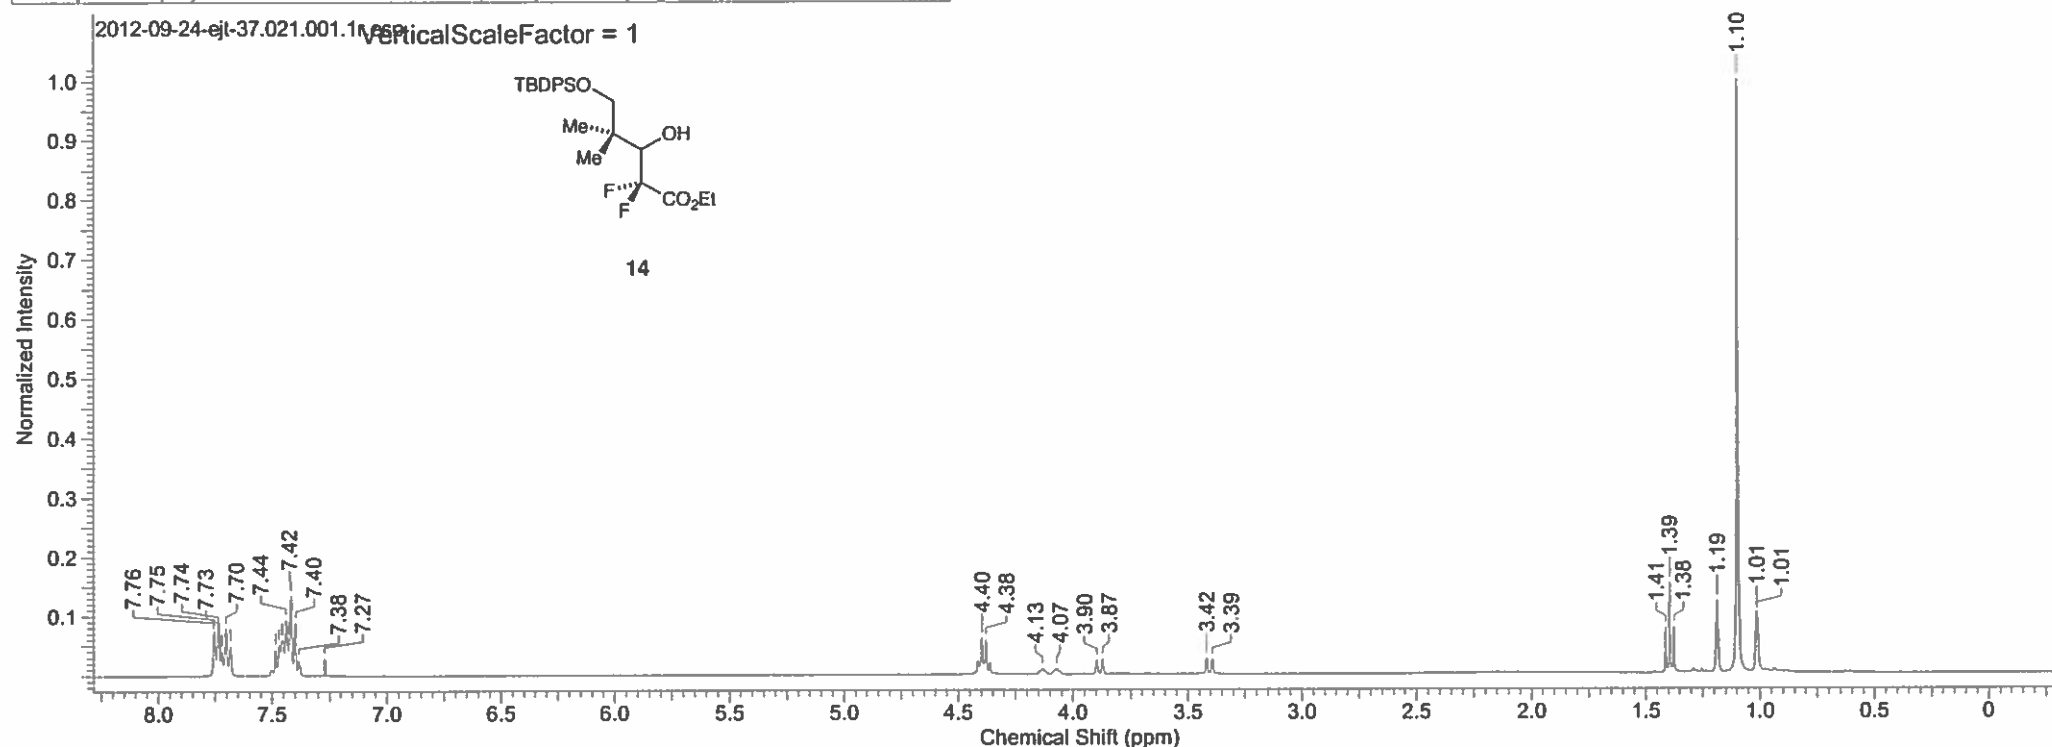

| No. | (ppm) | (Hz)   | Height |
|-----|-------|--------|--------|-----|-------|--------|--------|-----|-------|--------|--------|-----|-------|--------|--------|
| 1   | 1.01  | 404.7  | 0.0991 | 9   | 3.42  | 1367.4 | 0.0266 | 17  | 7.38  | 2954.1 | 0.0268 | 25  | 7.46  | 2984.4 | 0.0597 |
| 2   | 1.01  | 406.0  | 0.1034 | 10  | 3.87  | 1549.3 | 0.0257 | 18  | 7.40  | 2960.4 | 0.0893 | 26  | 7.47  | 2988.6 | 0.0512 |
| 3   | 1.10  | 439.0  | 1.0000 | 11  | 3.90  | 1559.4 | 0.0233 | 19  | 7.42  | 2967.7 | 0.1354 | 27  | 7.49  | 2995.2 | 0.0433 |
| 4   | 1.19  | 474.9  | 0.1219 | 12  | 4.07  | 1629.2 | 0.0093 | 20  | 7.42  | 2969.2 | 0.1038 | 28  | 7.68  | 3074.4 | 0.0505 |
| 5   | 1.38  | 550.3  | 0.0775 | 13  | 4.13  | 1653.7 | 0.0094 | 21  | 7.43  | 2971.0 | 0.0623 | 29  | 7.70  | 3081.2 | 0.0732 |
| 6   | 1.39  | 557.3  | 0.1528 | 14  | 4.38  | 1752.6 | 0.0584 | 22  | 7.44  | 2976.3 | 0.0944 | 30  | 7.70  | 3082.5 | 0.0804 |
| 7   | 1.41  | 564.6  | 0.0761 | 15  | 4.40  | 1759.6 | 0.0613 | 23  | 7.45  | 2982.3 | 0.0596 | 31  | 7.72  | 3089.0 | 0.0416 |
| 8   | 3.39  | 1357.3 | 0.0242 | 16  | 7.27  | 2908.9 | 0.0286 | 24  | 7.46  | 2983.3 | 0.0587 | 32  | 7.72  | 3090.5 | 0.0400 |
|     |       |        |        |     |       |        |        |     |       |        |        | 33  | 7.73  | 3092.1 | 0.0258 |
|     |       |        |        |     |       |        |        |     |       |        |        | 34  | 7.73  | 3094.3 | 0.0699 |
|     |       |        |        |     |       |        |        |     |       |        |        | 35  | 7.74  | 3095.6 | 0.0802 |
|     |       |        |        |     |       |        |        |     |       |        |        | 36  | 7.75  | 3101.9 | 0.0759 |
|     |       |        |        |     |       |        |        |     |       |        |        | 37  | 7.76  | 3103.1 | 0.0708 |

|                        |                                                                                                               |                        |                                                                          |                      |                 |                       |          |
|------------------------|---------------------------------------------------------------------------------------------------------------|------------------------|--------------------------------------------------------------------------|----------------------|-----------------|-----------------------|----------|
| Acquisition Time (sec) | 1.0835                                                                                                        | Comment                | ejt cry zinc product mCARBONnight CDCl3 (e:\bruk400data\2012\Sep) ejt 37 |                      |                 |                       |          |
| Date                   | 25 Sep 2012 08:04:32                                                                                          | Date Stamp             | 25 Sep 2012 08:04:32                                                     |                      |                 |                       |          |
| File Name              | \\ss7a.ds.man.ac.uk\vol5\vol3\users\snmrdata\bruk400data\2012\Sep\data\ejt\Nmr\2012-09-24-ejt-37\20\data\1\1r |                        |                                                                          |                      | Frequency (MHz) | 100.61                |          |
| Nucleus                | 13C                                                                                                           | Number of Transients   | 1000                                                                     | Origin               | AV400           | Original Points Count | 32768    |
| Owner                  | Administrator                                                                                                 | Points Count           | 32768                                                                    | Pulse Sequence       | zgpg30          | Receiver Gain         | 512.00   |
| SW(cyclical) (Hz)      | 30241.94                                                                                                      | Solvent                | CHLOROFORM-d                                                             | Spectrum Offset (Hz) | 11328.5381      | Spectrum Type         | STANDARD |
| Sweep Width (Hz)       | 30241.01                                                                                                      | Temperature (degree C) | 21.600                                                                   |                      |                 |                       |          |

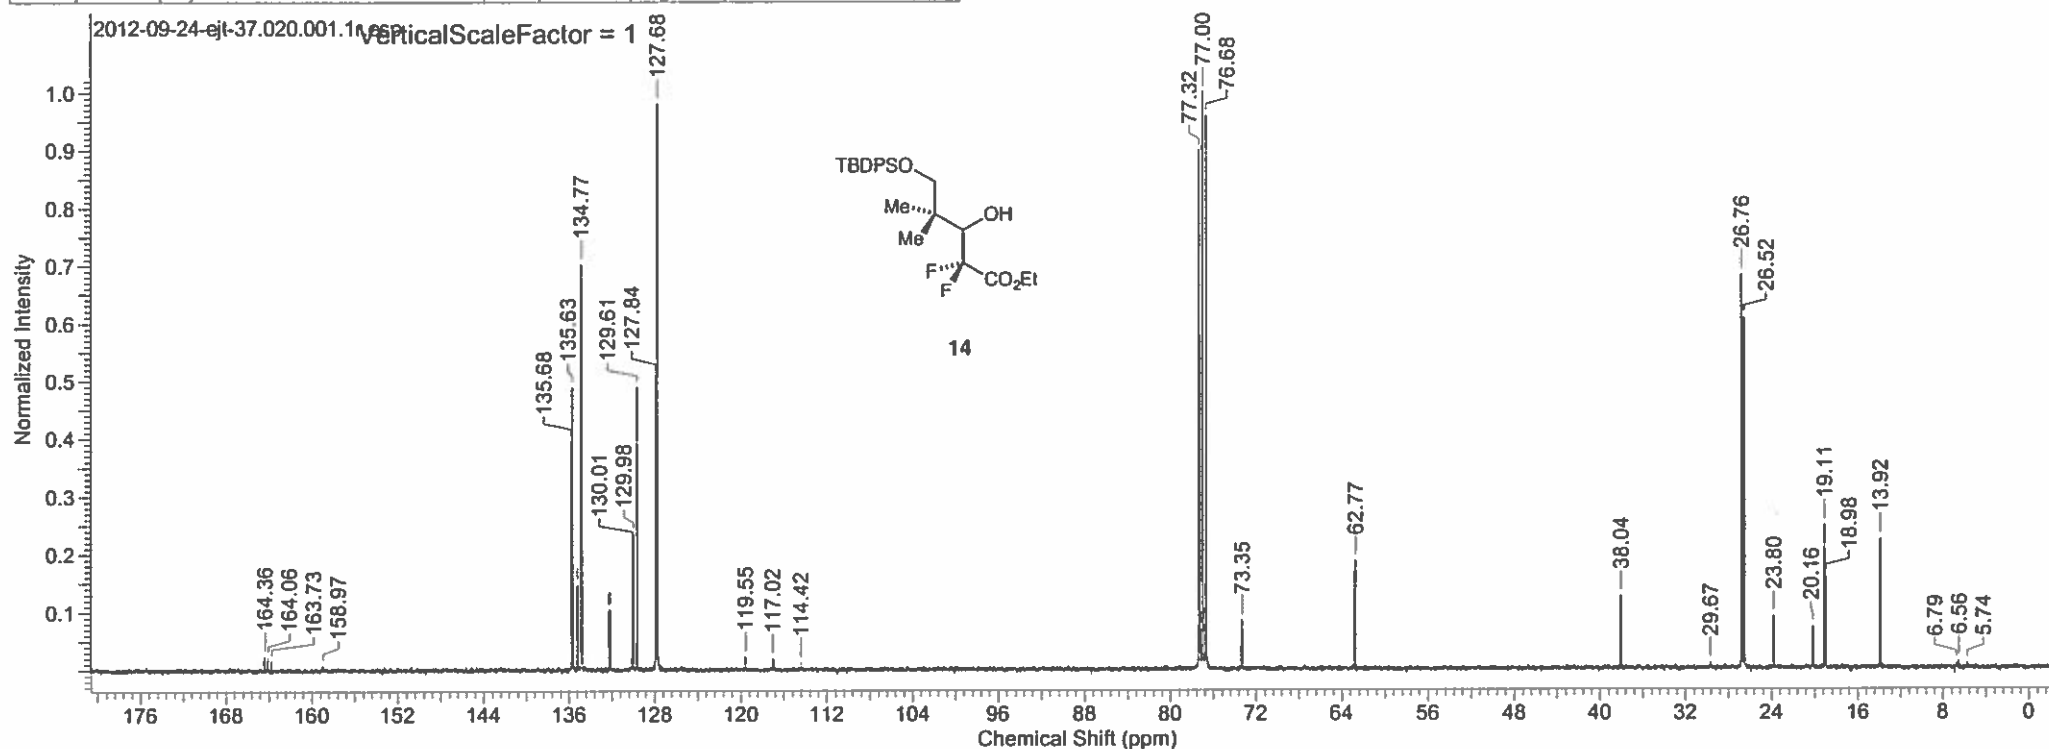

| No. | (ppm) | (Hz)   | Height | No. | (ppm) | (Hz)   | Height | No. | (ppm)  | (Hz)    | Height | No. | (ppm)  | (Hz)    | Height |
|-----|-------|--------|--------|-----|-------|--------|--------|-----|--------|---------|--------|-----|--------|---------|--------|
| 1   | 5.74  | 577.1  | 0.0093 | 10  | 26.52 | 2668.4 | 0.6070 | 19  | 77.00  | 7747.2  | 1.0000 | 28  | 127.84 | 12862.0 | 0.5090 |
| 2   | 6.56  | 660.2  | 0.0119 | 11  | 26.76 | 2692.4 | 0.6829 | 20  | 77.20  | 7767.5  | 0.0691 | 29  | 129.61 | 13040.1 | 0.4893 |
| 3   | 6.79  | 683.2  | 0.0090 | 12  | 29.67 | 2985.0 | 0.0095 | 21  | 77.32  | 7779.5  | 0.8987 | 30  | 129.98 | 13077.9 | 0.2343 |
| 4   | 13.92 | 1400.3 | 0.2237 | 13  | 38.04 | 3827.6 | 0.1250 | 22  | 114.42 | 11511.7 | 0.0121 | 31  | 130.01 | 13080.7 | 0.2185 |
| 5   | 18.98 | 1909.8 | 0.1580 | 14  | 62.77 | 6315.7 | 0.1868 | 23  | 116.95 | 11766.5 | 0.0172 | 32  | 132.09 | 13290.2 | 0.1047 |
| 6   | 19.11 | 1922.7 | 0.2472 | 15  | 73.31 | 7376.2 | 0.0789 | 24  | 117.02 | 11773.8 | 0.0187 | 33  | 132.23 | 13304.0 | 0.1029 |
| 7   | 20.16 | 2027.9 | 0.0721 | 16  | 73.35 | 7379.9 | 0.0836 | 25  | 119.55 | 12028.6 | 0.0216 | 34  | 134.77 | 13559.7 | 0.7025 |
| 8   | 23.77 | 2391.5 | 0.0884 | 17  | 76.68 | 7714.9 | 0.9580 | 26  | 127.68 | 12846.3 | 0.9803 | 35  | 135.16 | 13598.4 | 0.1467 |
| 9   | 23.80 | 2394.3 | 0.0903 | 18  | 76.93 | 7739.8 | 0.0754 | 27  | 127.82 | 12860.1 | 0.4990 | 36  | 135.63 | 13646.4 | 0.4880 |

ejty cry meli  
mPROTON CDCl3 {e:\bruk400data\2012\Feb} ejt 41

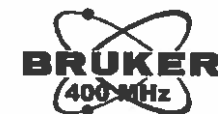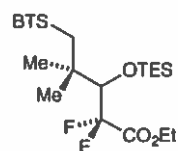

15

NAME 2012-02-24-ejt-41  
EXPNO 10  
PROCNO 1  
Date\_ 20120224  
Time 13.38  
INSTRUM AV400  
PROBHD 5 mm PABBO BB-  
PULPROG zg30b  
TD 65536  
SOLVENT CDCl3  
NS 16  
DS 0  
SWH 8264.463 Hz  
FIDRES 0.126106 Hz  
AQ 3.9649780 sec  
RG 181  
DW 60.500 usec  
DE 9.40 usec  
TE 294.8 K  
D1 1.00000000 sec  
TD0 1

===== CHANNEL f1 =====  
NUC1 1H  
P1 10.00 usec  
PL1 -3.60 dB  
PL1W 17.83863831 W  
SFO1 400.1324710 MHz  
SI 32768  
SF 400.1300381 MHz  
WDW EM  
SSB 0  
LB 0.30 Hz  
GB 0  
PC 1.00

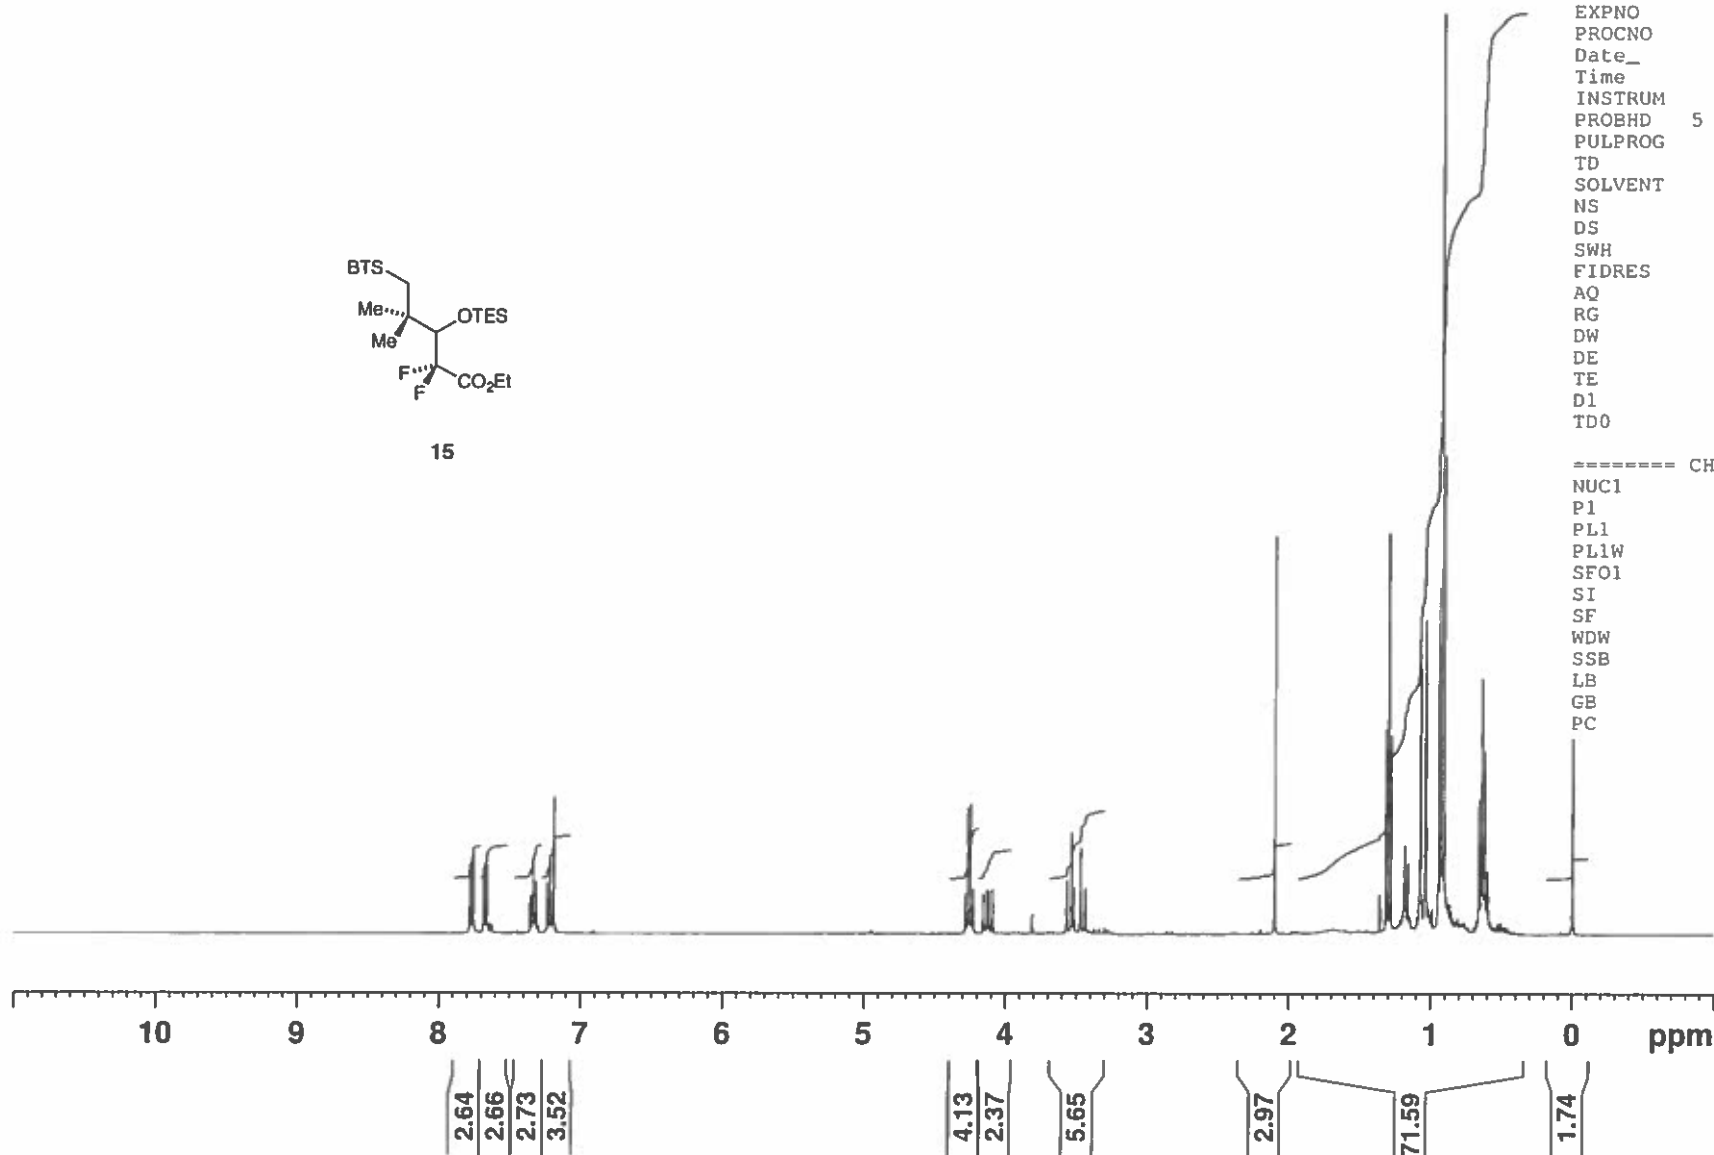

ejt cry tes 3-5  
mCARBONnight CDC13 /opt/bruk500data/2012/Feb ejt 28

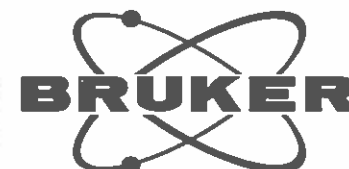

NAME 2012-02-13-ejt-28  
EXPNO 12  
PROCNO 1  
Date\_ 20120214  
Time 0.08  
INSTRUM spect  
PROBHD 5 mm PABBO BB-  
PULPROG zgpg30  
TD 65536  
SOLVENT CDC13  
NS 500  
DS 2  
SWH 29761.904 Hz  
FIDRES 0.454131 Hz  
AQ 1.1010548 sec  
RG 512  
DW 16.800 usec  
DE 32.78 usec  
TE 300.0 K  
D1 2.00000000 sec  
D11 0.03000000 sec  
TD0 1

===== CHANNEL f1 =====  
NUC1 13C  
P1 8.80 usec  
PL1 -1.00 dB  
PL1W 104.35516357 W  
SFO1 125.7703643 MHz

===== CHANNEL f2 =====  
CPDPRG2 waltz16  
NUC2 1H  
PCPD2 80.00 usec  
PL2 0.00 dB  
PL12 17.23 dB  
PL13 120.00 dB  
PL2W 25.62124252 W  
PL12W 0.48484197 W  
PL13W 0.00000000 W  
SFO2 500.1320005 MHz  
SI 32768  
SF 125.7577890 MHz  
WDW EM  
SSB 0  
LB 1.00 Hz  
GB 0  
PC 1.40

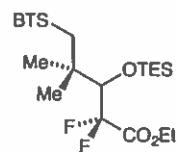

15

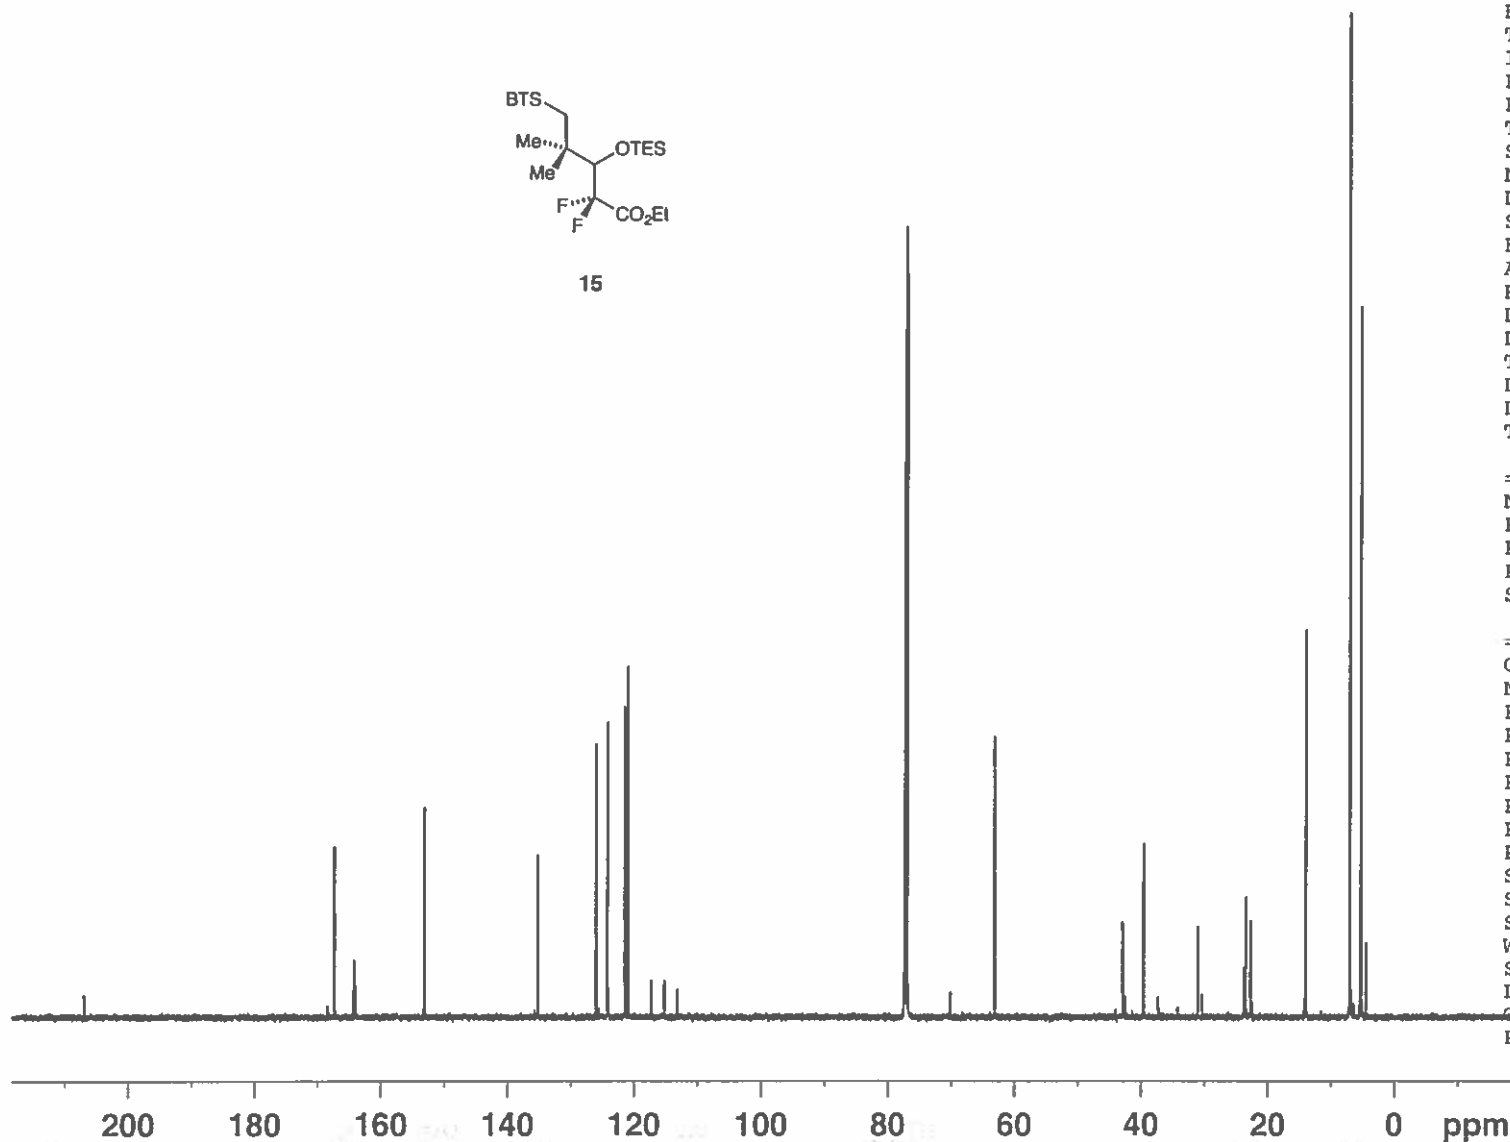

ejt cry tes  
mF19 CDC13 {e:\bruk400data\2012\Mar} ejt 58

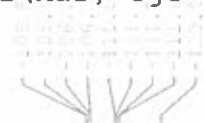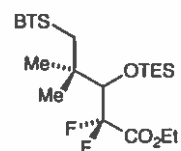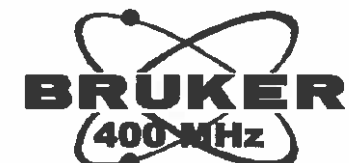

NAME 2012-03-21-ejt-58  
EXPNO 10  
PROCNO 1  
Date\_ 20120321  
Time 15.43  
INSTRUM AV400  
PROBHD 5 mm PABBO BB-  
PULPROG zg  
TD 131072  
SOLVENT CDC13  
NS 16  
DS 4  
SWH 89285.711 Hz  
FIDRES 0.681196 Hz  
AQ 0.7340532 sec  
RG 4100  
DW 5.600 usec  
DE 11.01 usec  
TE 295.1 K  
D1 1.00000000 sec  
TD0 1

===== CHANNEL f1 =====  
NUC1 19F  
P1 10.70 usec  
PL1 -5.00 dB  
PL1W 27.00716019 W  
SFO1 376.4607164 MHz  
SI 262144  
SF 376.4983660 MHz  
WDW EM  
SSB 0  
LB 0.30 Hz  
GB 0  
PC 2.00

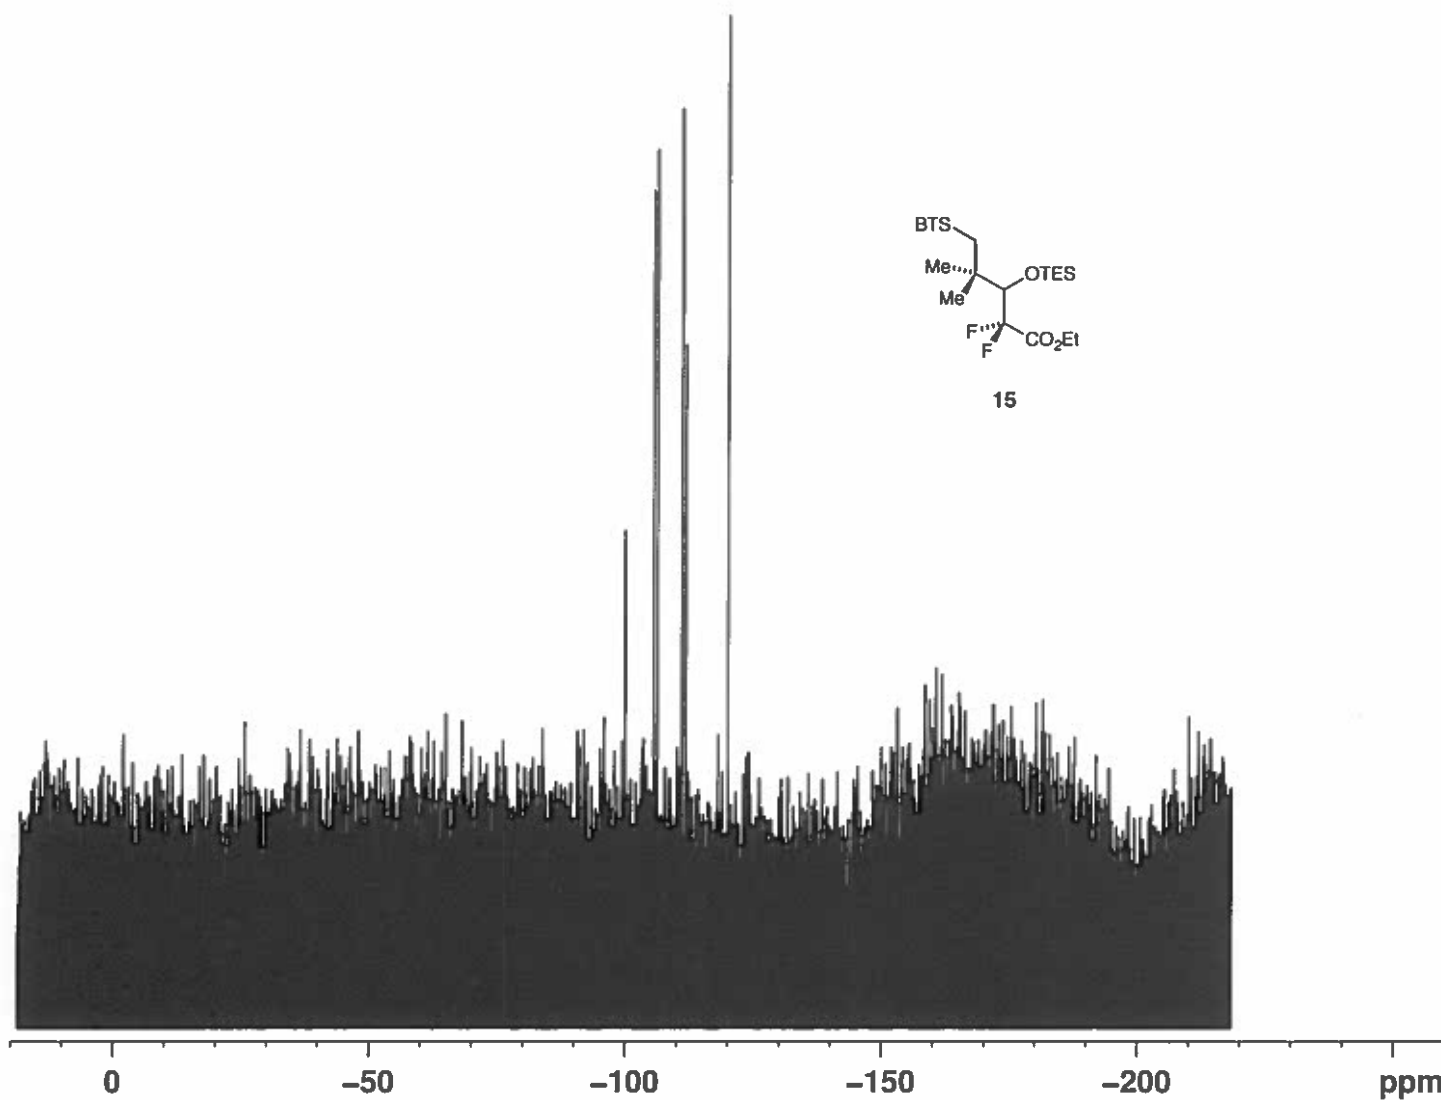



|                        |                      |                   |                                                                                                                          |                        |              |                      |           |
|------------------------|----------------------|-------------------|--------------------------------------------------------------------------------------------------------------------------|------------------------|--------------|----------------------|-----------|
| Acquisition Time (sec) | 3.1719               | Comment           | ejt cry tes prot mPROTON CDCl3 /opt/bruk500data/2012/Jul ejt 10                                                          |                        | Date         | 31 Jul 2012 11:08:00 |           |
| Date Stamp             | 31 Jul 2012 11:08:00 | File Name         | \\ss7a.ds.man.ac.uk\vol5\vol3\users\snmrdata\bruk500data\bruk500data\2012\Jul\data\ejt\nmr\2012-07-31-ejt-10\10\data\11r |                        |              |                      |           |
| Frequency (MHz)        | 500.13               | Nucleus           | 1H                                                                                                                       | Number of Transients   | 16           | Origin               | spect     |
| Original Points Count  | 32768                | Owner             | nmr1                                                                                                                     | Points Count           | 32768        | Pulse Sequence       | zg30b     |
| Receiver Gain          | 90.50                | SW(cyclical) (Hz) | 10330.58                                                                                                                 | Solvent                | CHLOROFORM-d | Spectrum Offset (Hz) | 3080.2925 |
| Spectrum Type          | STANDARD             | Sweep Width (Hz)  | 10330.26                                                                                                                 | Temperature (degree C) | 27.000       |                      |           |

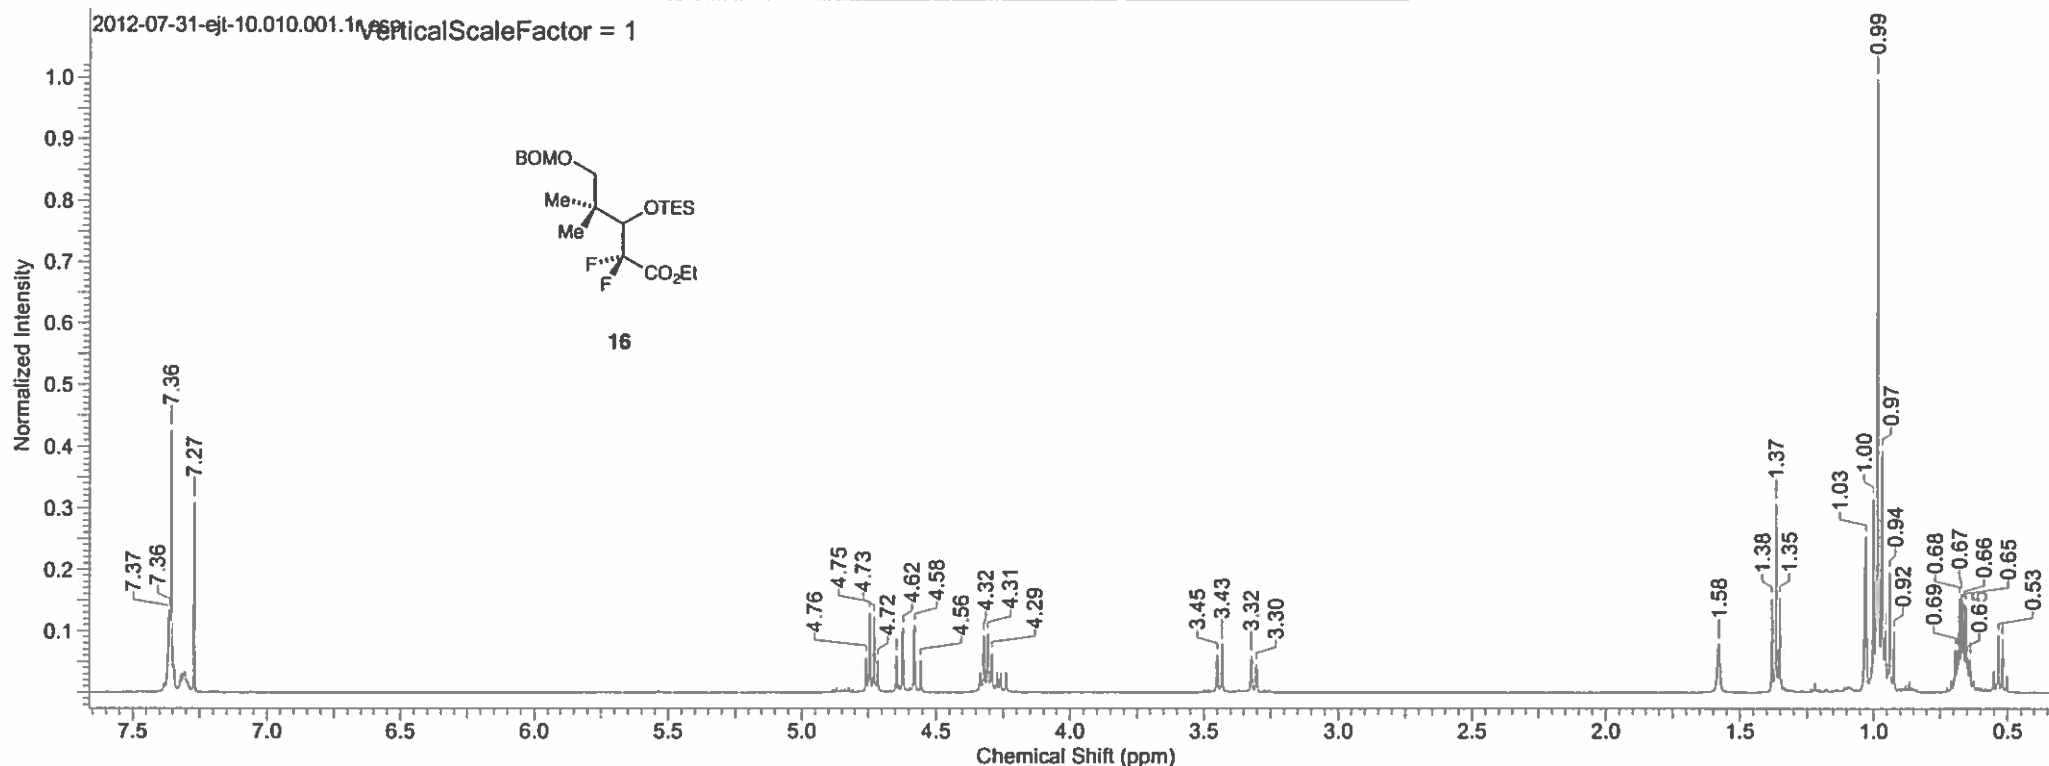

| No. | (ppm) | (Hz)  | Height | No. | (ppm) | (Hz)  | Height | No. | (ppm) | (Hz)   | Height | No. | (ppm) | (Hz)   | Height |
|-----|-------|-------|--------|-----|-------|-------|--------|-----|-------|--------|--------|-----|-------|--------|--------|
| 1   | 0.52  | 259.2 | 0.0866 | 10  | 0.69  | 347.1 | 0.0698 | 19  | 1.35  | 676.2  | 0.1536 | 28  | 4.29  | 2146.6 | 0.0634 |
| 2   | 0.53  | 267.0 | 0.0938 | 11  | 0.92  | 461.9 | 0.0986 | 20  | 1.36  | 679.7  | 0.0425 | 29  | 4.31  | 2153.9 | 0.0958 |
| 3   | 0.64  | 319.4 | 0.0536 | 12  | 0.94  | 469.7 | 0.1950 | 21  | 1.37  | 683.5  | 0.3057 | 30  | 4.32  | 2161.1 | 0.0920 |
| 4   | 0.65  | 323.8 | 0.0573 | 13  | 0.96  | 477.6 | 0.1019 | 22  | 1.38  | 690.4  | 0.1533 | 31  | 4.56  | 2278.4 | 0.0522 |
| 5   | 0.65  | 327.6 | 0.1427 | 14  | 0.96  | 479.5 | 0.0617 | 23  | 1.58  | 789.4  | 0.0789 | 32  | 4.58  | 2290.1 | 0.1087 |
| 6   | 0.66  | 331.7 | 0.1452 | 15  | 0.97  | 484.9 | 0.3933 | 24  | 3.30  | 1652.3 | 0.0458 | 33  | 4.62  | 2311.8 | 0.1047 |
| 7   | 0.67  | 335.4 | 0.1599 | 16  | 0.99  | 492.8 | 1.0000 | 25  | 3.32  | 1661.4 | 0.0594 | 34  | 4.65  | 2323.5 | 0.0587 |
| 8   | 0.68  | 339.5 | 0.1533 | 17  | 1.00  | 500.6 | 0.3154 | 26  | 3.43  | 1716.3 | 0.0788 | 35  | 4.72  | 2358.5 | 0.0520 |
| 9   | 0.69  | 343.6 | 0.0687 | 18  | 1.03  | 515.1 | 0.2534 | 27  | 3.45  | 1725.4 | 0.0613 | 36  | 4.73  | 2365.1 | 0.1230 |

| No. | (ppm) | (Hz)   | Height |
|-----|-------|--------|--------|
| 37  | 4.75  | 2373.3 | 0.1291 |
| 38  | 4.76  | 2379.9 | 0.0568 |
| 39  | 7.27  | 3635.9 | 0.3093 |
| 40  | 7.35  | 3675.0 | 0.0455 |
| 41  | 7.36  | 3678.8 | 0.4257 |
| 42  | 7.36  | 3681.7 | 0.1335 |
| 43  | 7.37  | 3684.5 | 0.1228 |

ejt cry tes prot  
mCARBONnight CDCl3 {e:\bruk400data\2012\Jul} ejt 35

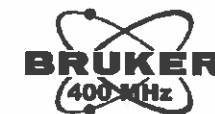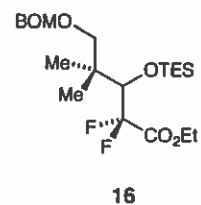

137.83  
128.44  
127.86  
127.71  
94.72  
77.34  
77.23  
77.02  
76.71  
75.33  
75.11  
74.68  
69.36  
62.75  
38.95  
21.16  
20.55  
13.83  
6.84  
6.42  
5.11

NAME 2012-07-31-ejt-35  
EXPNO 11  
PROCNO 1  
Date\_ 20120801  
Time 0.01  
INSTRUM AV400  
PROBHD 5 mm PABBO BB-  
PULPROG zgpg30  
TD 65536  
SOLVENT CDCl3  
NS 1000  
DS 2  
SWH 30241.936 Hz  
FIDRES 0.461455 Hz  
AQ 1.0835786 sec  
RG 512  
DW 16.533 usec  
DE 7.83 usec  
TE 296.1 K  
D1 2.00000000 sec  
D11 0.03000000 sec  
TD0 1

===== CHANNEL f1 =====  
NUC1 13C  
P1 8.00 usec  
PL1 0.00 dB  
PL1W 34.91522217 W  
SFO1 100.6241042 MHz

===== CHANNEL f2 =====  
CPDPRG2 waltz16  
NUC2 1H  
PCPD2 90.00 usec  
PL2 -3.60 dB  
PL12 15.31 dB  
PL13 18.00 dB  
PL2W 17.83863831 W  
PL12W 0.22927761 W  
PL13W 0.12341322 W  
SFO2 400.1316005 MHz  
SI 32768  
SF 100.6127690 MHz  
WDW EM  
SSB 0  
LB 1.00 Hz  
GB 0  
PC 1.40

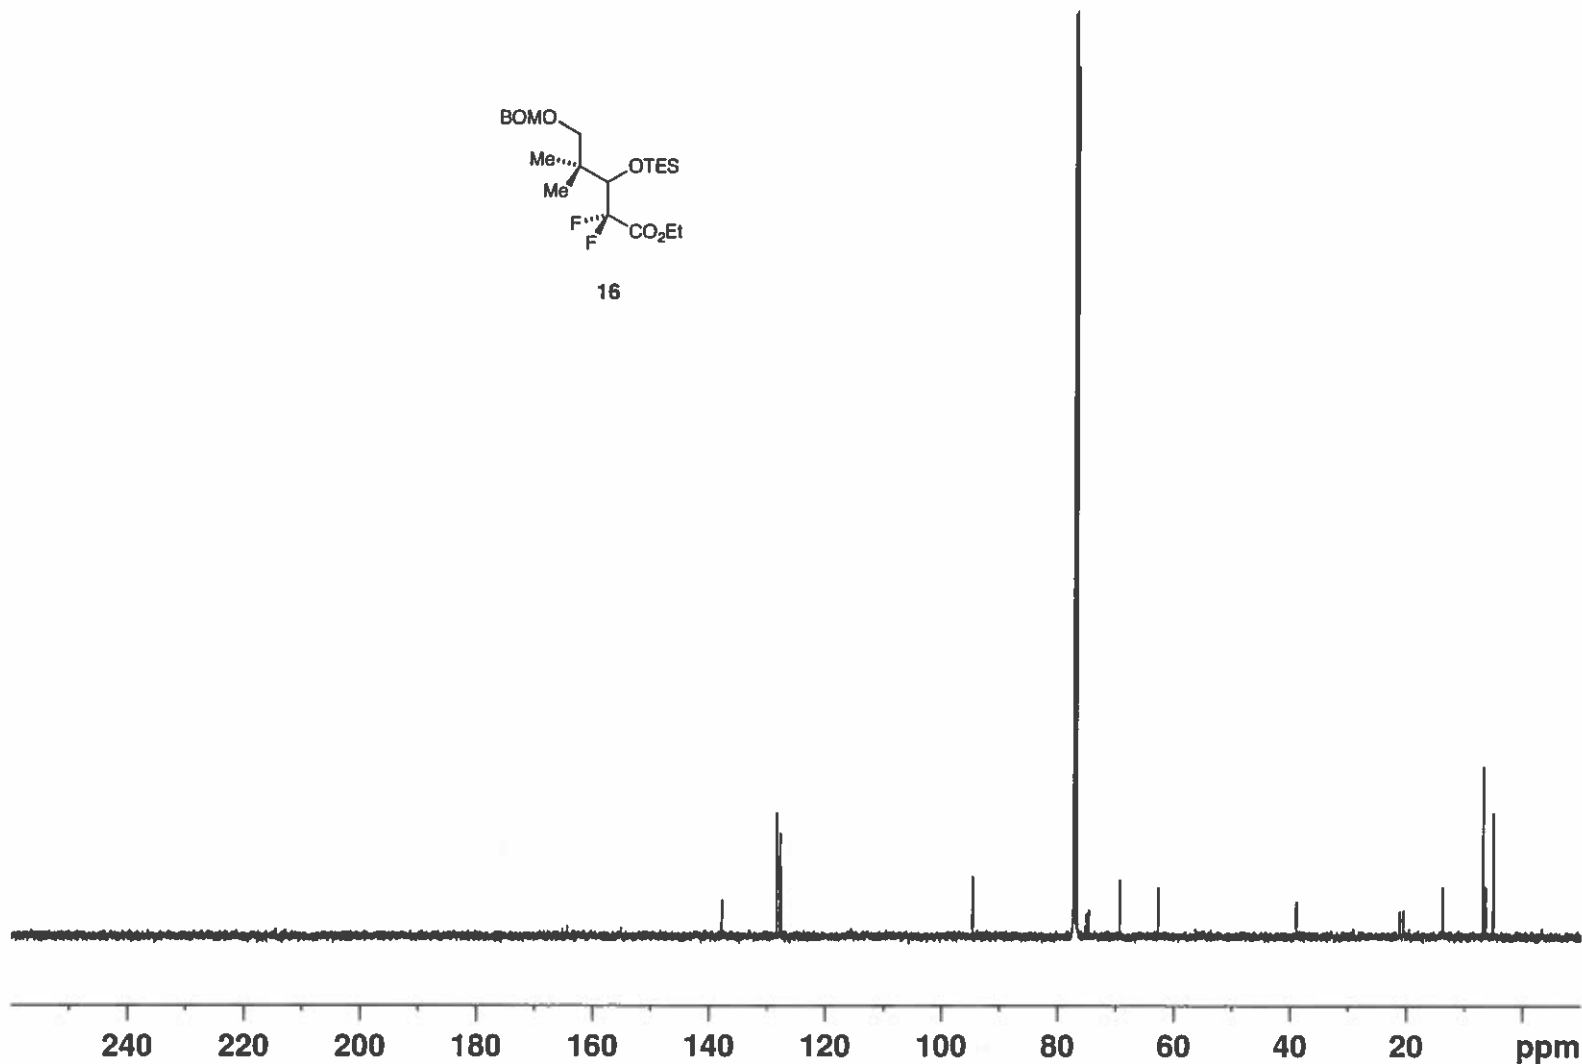

ejt cry tes prot  
mF19CPD CDCl3 {e:\bruk400data\2012\Jul} ejt 35

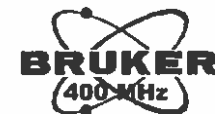

105.59  
105.78  
105.91  
106.19  
106.48  
106.61  
111.00  
111.28  
111.70  
111.98  
125.57

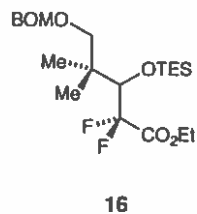

NAME 2012-07-31-ejt-35  
 EXPNO 10  
 PROCNO 1  
 Date\_ 20120731  
 Time 11.44  
 INSTRUM AV400  
 PROBHD 5 mm PABBO BB-  
 PULPROG zgig  
 TD 131072  
 SOLVENT CDCl3  
 NS 16  
 DS 4  
 SWH 89285.711 Hz  
 FIDRES 0.681196 Hz  
 AQ 0.7340532 sec  
 RG 4100  
 DW 5.600 usec  
 DE 7.51 usec  
 TE 295.6 K  
 D1 1.00000000 sec  
 D11 0.03000000 sec  
 TDO 1

===== CHANNEL f1 =====  
 NUC1 19F  
 P1 10.70 usec  
 PL1 -5.00 dB  
 PL1W 27.00716019 W  
 SFO1 376.4607164 MHz

===== CHANNEL f2 =====  
 CPDPRG2 waltz16  
 NUC2 1H  
 PCPD2 90.00 usec  
 PL2 -3.60 dB  
 PL12 15.31 dB  
 PL2W 17.83863831 W  
 PL12W 0.22927761 W  
 SFO2 400.1316005 MHz  
 SI 262144  
 SF 376.4983660 MHz  
 WDW EM  
 SSB 0  
 LB 0.30 Hz  
 GB 0  
 PC 2.00

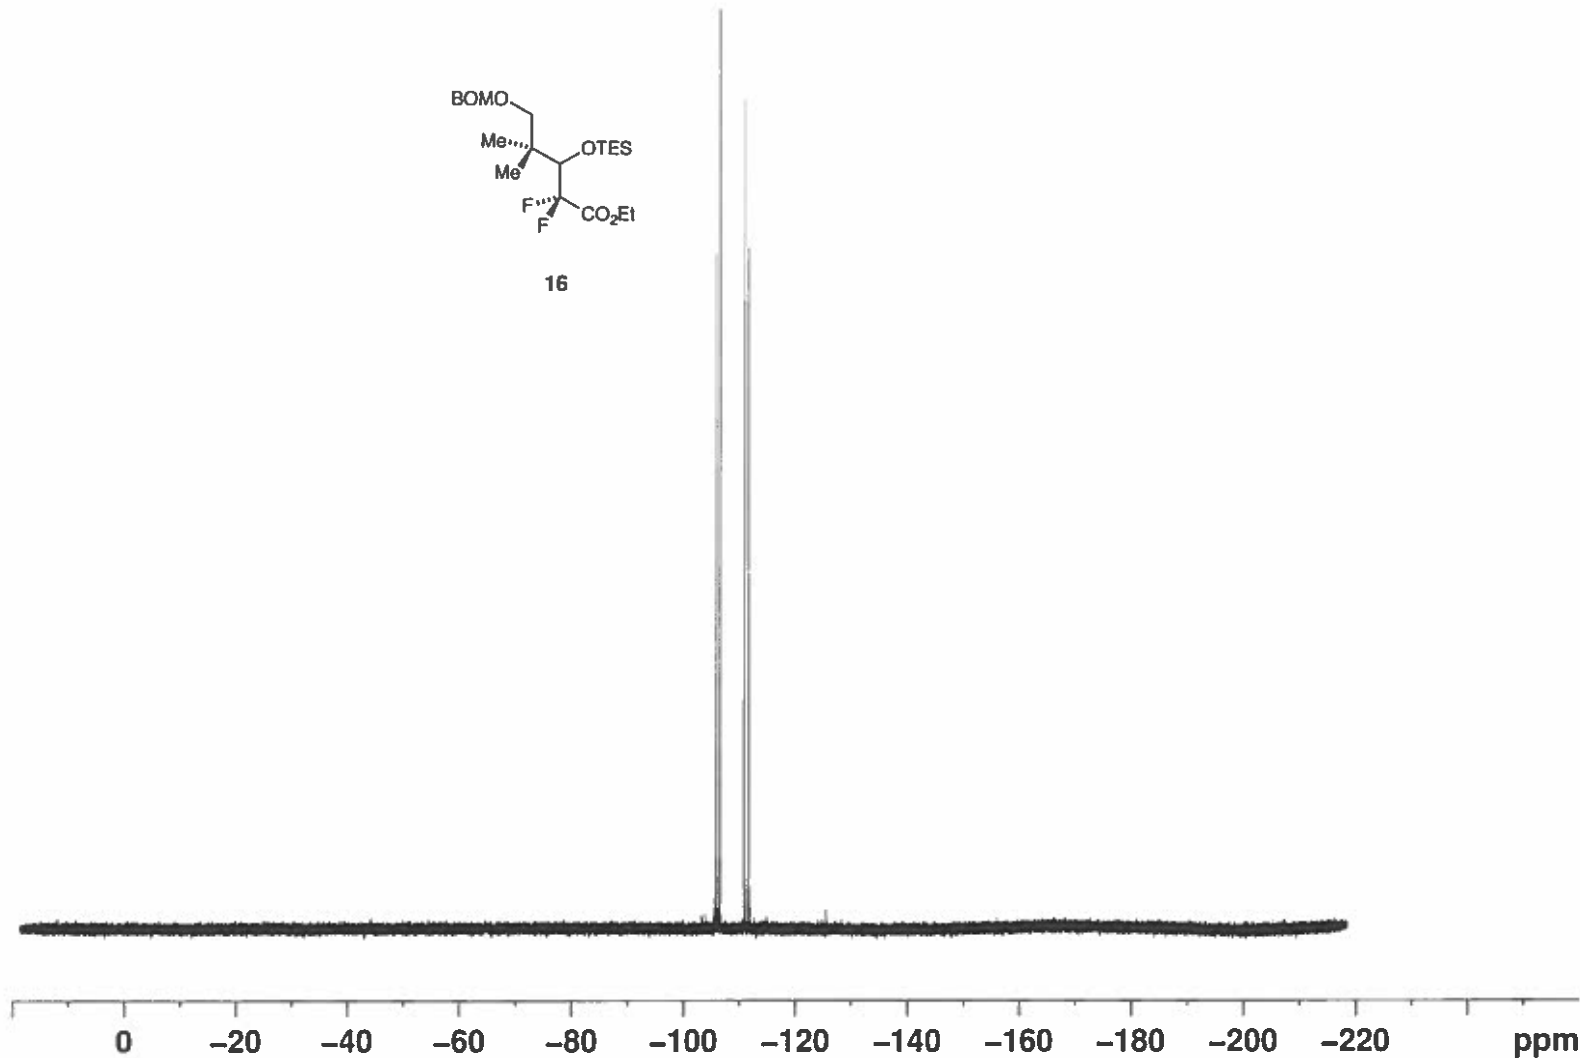

|                        |                                                                                                              |                        |                                                                       |                      |                 |                       |          |
|------------------------|--------------------------------------------------------------------------------------------------------------|------------------------|-----------------------------------------------------------------------|----------------------|-----------------|-----------------------|----------|
| Acquisition Time (sec) | 3.9649                                                                                                       | Comment                | ejt cry tes protection mPROTON CDCl3 (e:\bruk400data\2012\Sep) ejt 22 |                      |                 |                       |          |
| Date                   | 17 Sep 2012 15:04:48                                                                                         |                        | Date Stamp                                                            | 17 Sep 2012 15:04:48 |                 |                       |          |
| File Name              | \ss7a.ds.man.ac.uk\vol5\vol3\users\snmrdata\bruk400data\2012\Sep\data\ejt\nmr\2012-09-17-ejt-22\10\data\1\1r |                        |                                                                       |                      | Frequency (MHz) | 400.13                |          |
| Nucleus                | 1H                                                                                                           | Number of Transients   | 16                                                                    | Origin               | AV400           | Original Points Count | 32768    |
| Owner                  | Administrator                                                                                                | Points Count           | 32768                                                                 | Pulse Sequence       | zg30b           | Receiver Gain         | 287.00   |
| SW(cyclical) (Hz)      | 8264.46                                                                                                      | Solvent                | CHLOROFORM-d                                                          | Spectrum Offset (Hz) | 2464.6750       | Spectrum Type         | STANDARD |
| Sweep Width (Hz)       | 8264.21                                                                                                      | Temperature (degree C) | 22.200                                                                |                      |                 |                       |          |

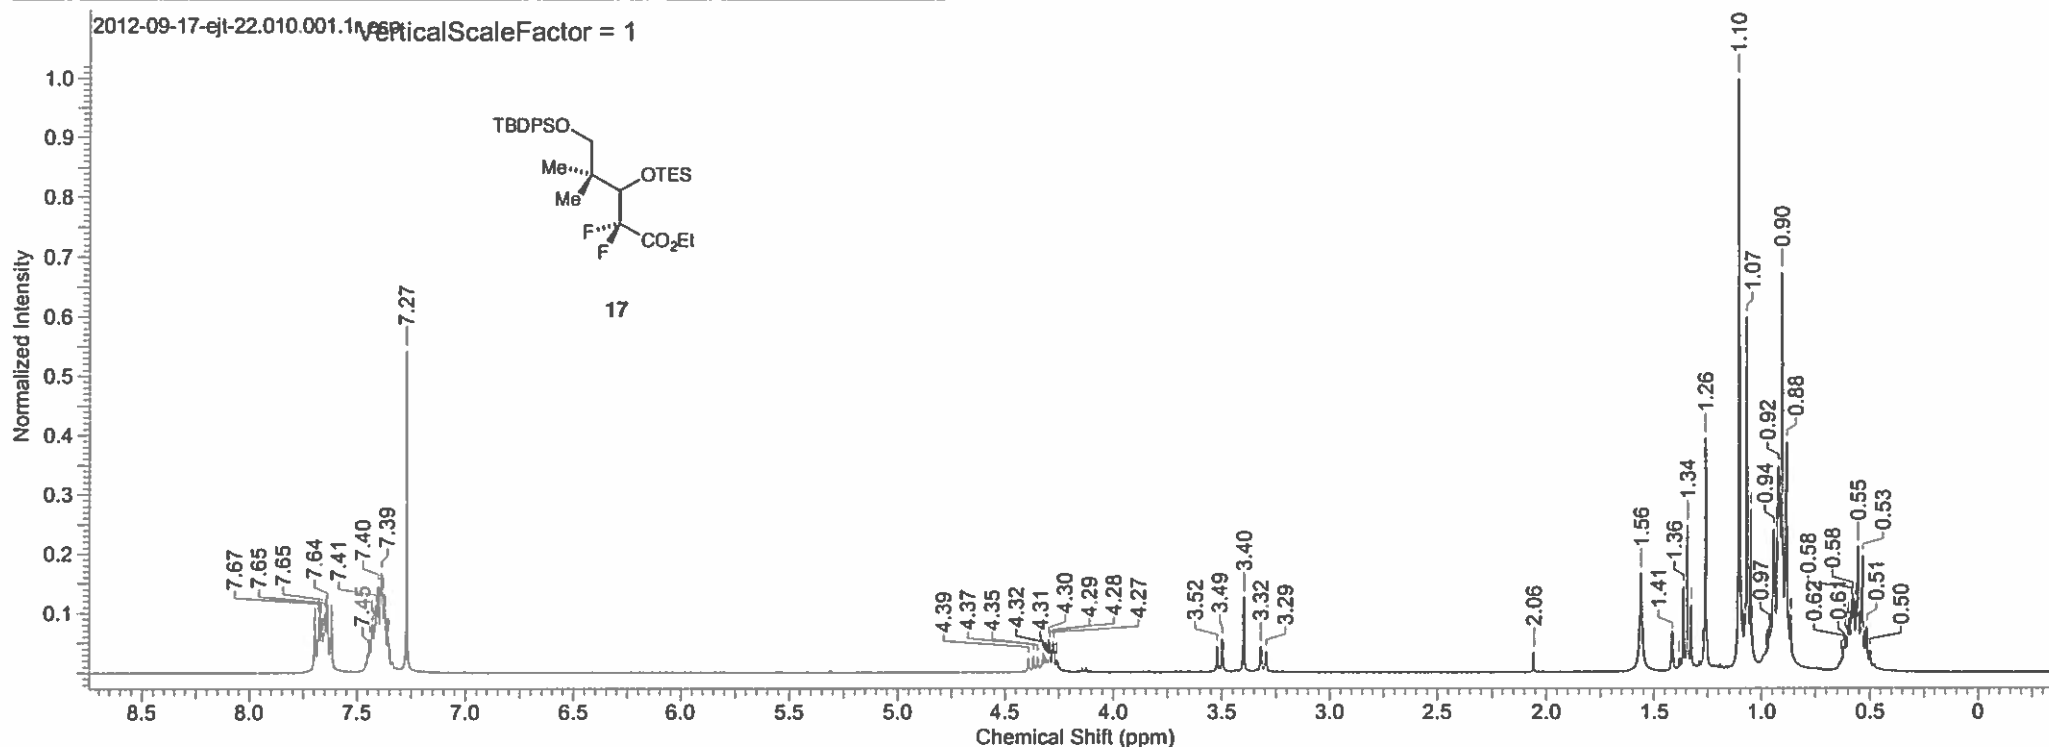

| No. | (ppm) | (Hz)  | Height |
|-----|-------|-------|--------|-----|-------|-------|--------|-----|-------|-------|--------|-----|-------|-------|--------|
| 1   | 0.50  | 198.9 | 0.0365 | 12  | 0.61  | 244.1 | 0.0597 | 23  | 0.94  | 377.0 | 0.2404 | 34  | 1.26  | 503.4 | 0.3944 |
| 2   | 0.51  | 205.2 | 0.0761 | 13  | 0.61  | 245.8 | 0.0438 | 24  | 0.95  | 378.3 | 0.2398 | 35  | 1.27  | 508.1 | 0.0415 |
| 3   | 0.53  | 213.1 | 0.1953 | 14  | 0.62  | 247.9 | 0.0422 | 25  | 0.96  | 383.8 | 0.0689 | 36  | 1.33  | 530.6 | 0.1129 |
| 4   | 0.54  | 217.3 | 0.0733 | 15  | 0.63  | 251.6 | 0.0247 | 26  | 0.97  | 386.3 | 0.0770 | 37  | 1.34  | 537.7 | 0.2470 |
| 5   | 0.55  | 220.9 | 0.2121 | 16  | 0.86  | 345.7 | 0.0959 | 27  | 0.97  | 389.4 | 0.0415 | 38  | 1.36  | 544.7 | 0.1441 |
| 6   | 0.56  | 225.2 | 0.1204 | 17  | 0.88  | 353.0 | 0.3885 | 28  | 0.98  | 391.6 | 0.0350 | 39  | 1.38  | 552.0 | 0.0236 |
| 7   | 0.58  | 230.2 | 0.1316 | 18  | 0.90  | 360.9 | 0.6733 | 29  | 1.05  | 419.6 | 0.2737 | 40  | 1.41  | 564.4 | 0.0379 |
| 8   | 0.58  | 233.0 | 0.1224 | 19  | 0.91  | 362.4 | 0.5130 | 30  | 1.07  | 426.7 | 0.5991 | 41  | 1.41  | 565.9 | 0.0633 |
| 9   | 0.59  | 236.0 | 0.0720 | 20  | 0.92  | 366.7 | 0.3024 | 31  | 1.08  | 432.5 | 0.0672 | 42  | 1.42  | 567.4 | 0.0394 |
| 10  | 0.60  | 238.3 | 0.0895 | 21  | 0.92  | 368.7 | 0.3475 | 32  | 1.09  | 434.5 | 0.0747 | 43  | 1.56  | 624.4 | 0.1664 |
| 11  | 0.60  | 240.5 | 0.0780 | 22  | 0.93  | 370.4 | 0.2798 | 33  | 1.10  | 440.8 | 1.0000 | 44  | 2.06  | 822.9 | 0.0340 |

me ketone  
mPROTON CDCl3 {e:\bruk400data\2012\Mar} ejt 38

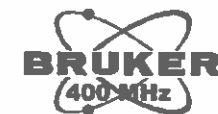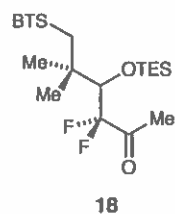

NAME 2012-03-01-ejt-38  
EXPNO 10  
PROCNO 1  
Date\_ 20120301  
Time 14.22  
INSTRUM AV400  
PROBHD 5 mm PABBO BB-  
PULPROG zg30b  
TD 65536  
SOLVENT CDCl3  
NS 16  
DS 0  
SWH 8264.463 Hz  
FIDRES 0.126106 Hz  
AQ 3.9649780 sec  
RG 144  
DW 60.500 usec  
DE 9.40 usec  
TE 295.0 K  
D1 1.00000000 sec  
TD0 1

===== CHANNEL f1 =====  
NUC1 1H  
P1 10.00 usec  
PL1 -3.60 dB  
PL1W 17.83863831 W  
SFO1 400.1324710 MHz  
SI 32768  
SF 400.1300383 MHz  
WDW EM  
SSB 0  
LB 0.30 Hz  
GB 0  
PC 1.00

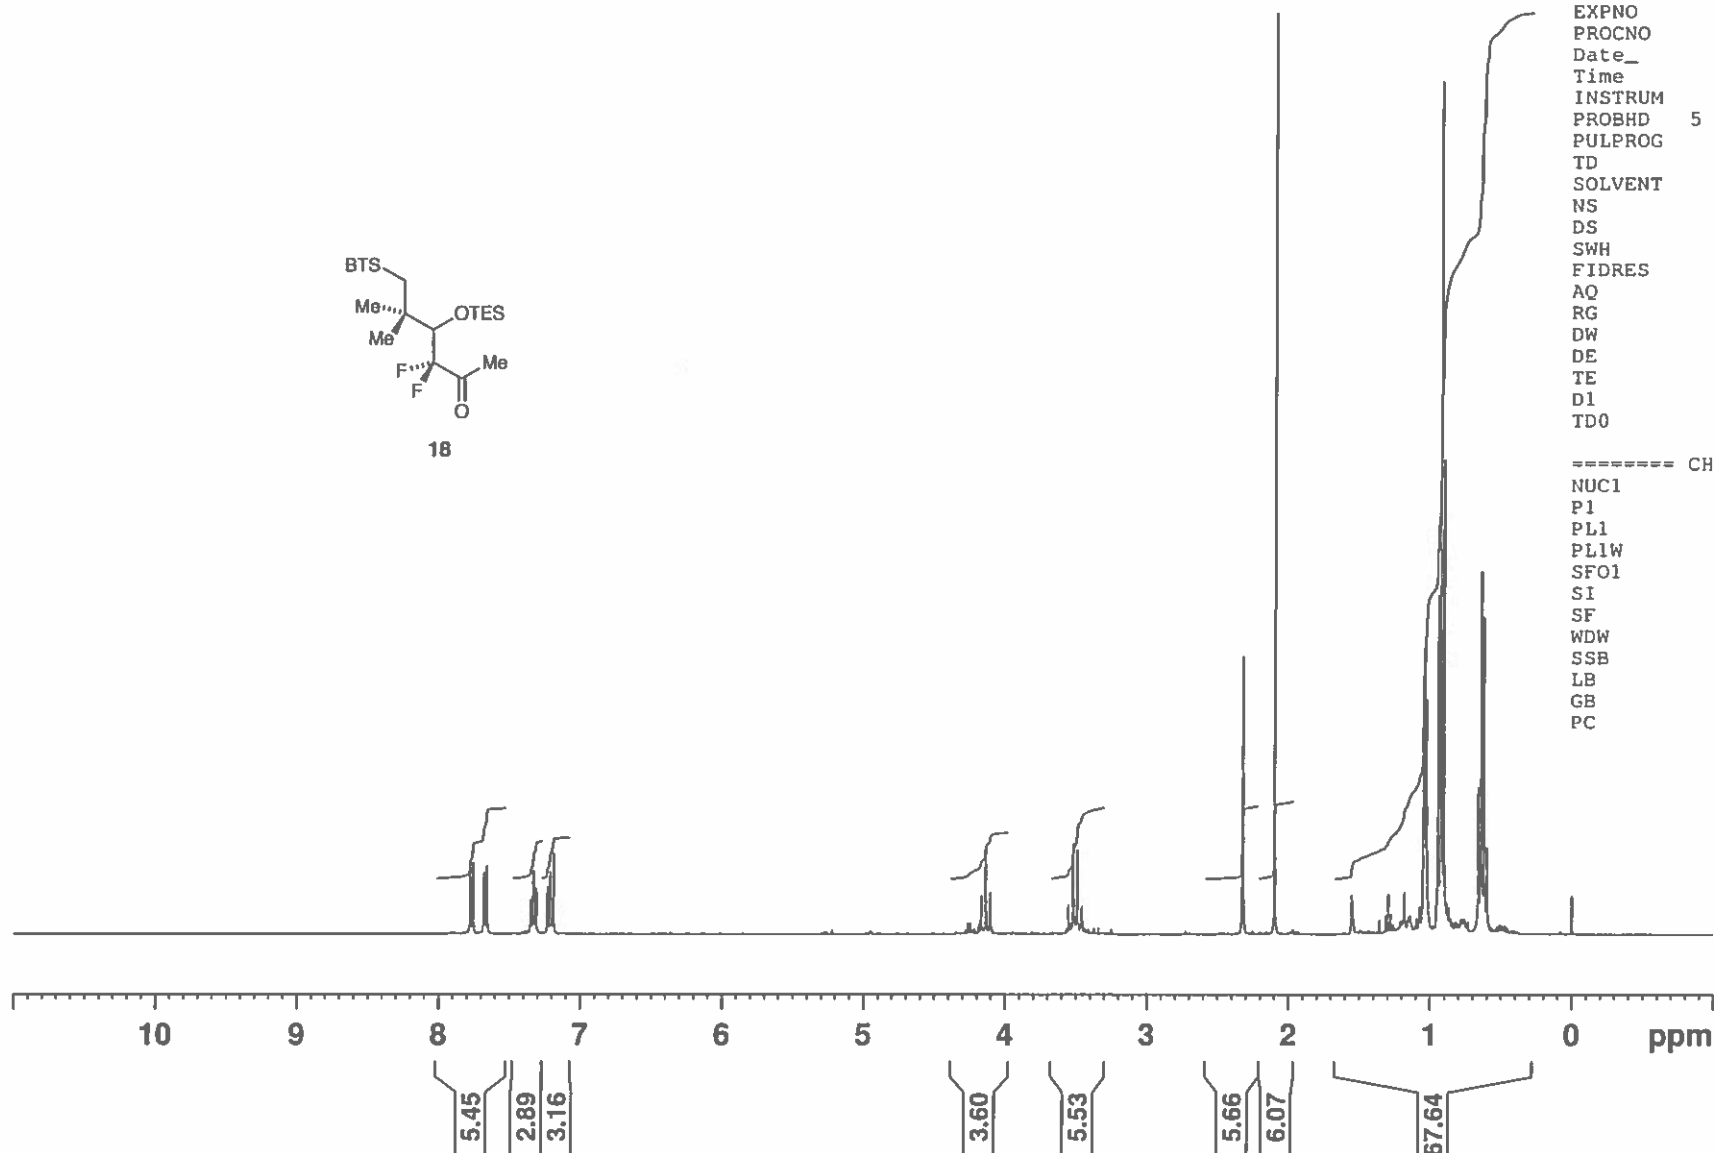

me ketone  
mCARBONnight CDCl<sub>3</sub> {e:\bruk400data\2012\Mar} ejt 38

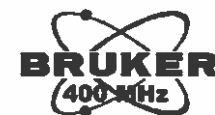

206.99  
199.77  
199.47

167.33

153.07

135.28  
126.00  
124.20  
121.44  
120.95  
116.94

77.35  
77.03  
76.83  
76.72  
76.59  
63.05

42.68  
39.49  
39.43  
30.95  
29.71  
26.21  
23.51  
23.09  
13.84  
6.91  
5.17  
5.12  
1.36

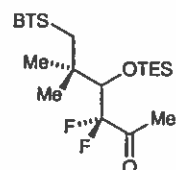

18

NAME 2012-03-01-ejt-38  
EXPNO 11  
PROCNO 1  
Date\_ 20120302  
Time 6.17  
INSTRUM AV400  
PROBHD 5 mm PABBO BB-  
PULPROG zgpg30  
TD 65536  
SOLVENT CDCl<sub>3</sub>  
NS 1000  
DS 2  
SWH 30241.936 Hz  
FIDRES 0.461455 Hz  
AQ 1.0835786 sec  
RG 512  
DW 16.533 usec  
DE 7.83 usec  
TE 295.5 K  
D1 2.00000000 sec  
D11 0.03000000 sec  
TD0 1

===== CHANNEL f1 =====  
NUC1 13C  
P1 8.00 usec  
PL1 0.00 dB  
PL1W 34.91522217 W  
SFO1 100.6241042 MHz

===== CHANNEL f2 =====  
CPDPRG2 waltz16  
NUC2 1H  
PCPD2 90.00 usec  
PL2 -3.60 dB  
PL12 15.31 dB  
PL13 18.00 dB  
PL2W 17.83863831 W  
PL12W 0.22927761 W  
PL13W 0.12341322 W  
SFO2 400.1316005 MHz  
SI 32768  
SF 100.6127690 MHz  
WDW EM  
SSB 0  
LB 1.00 Hz  
GB 0  
PC 1.40

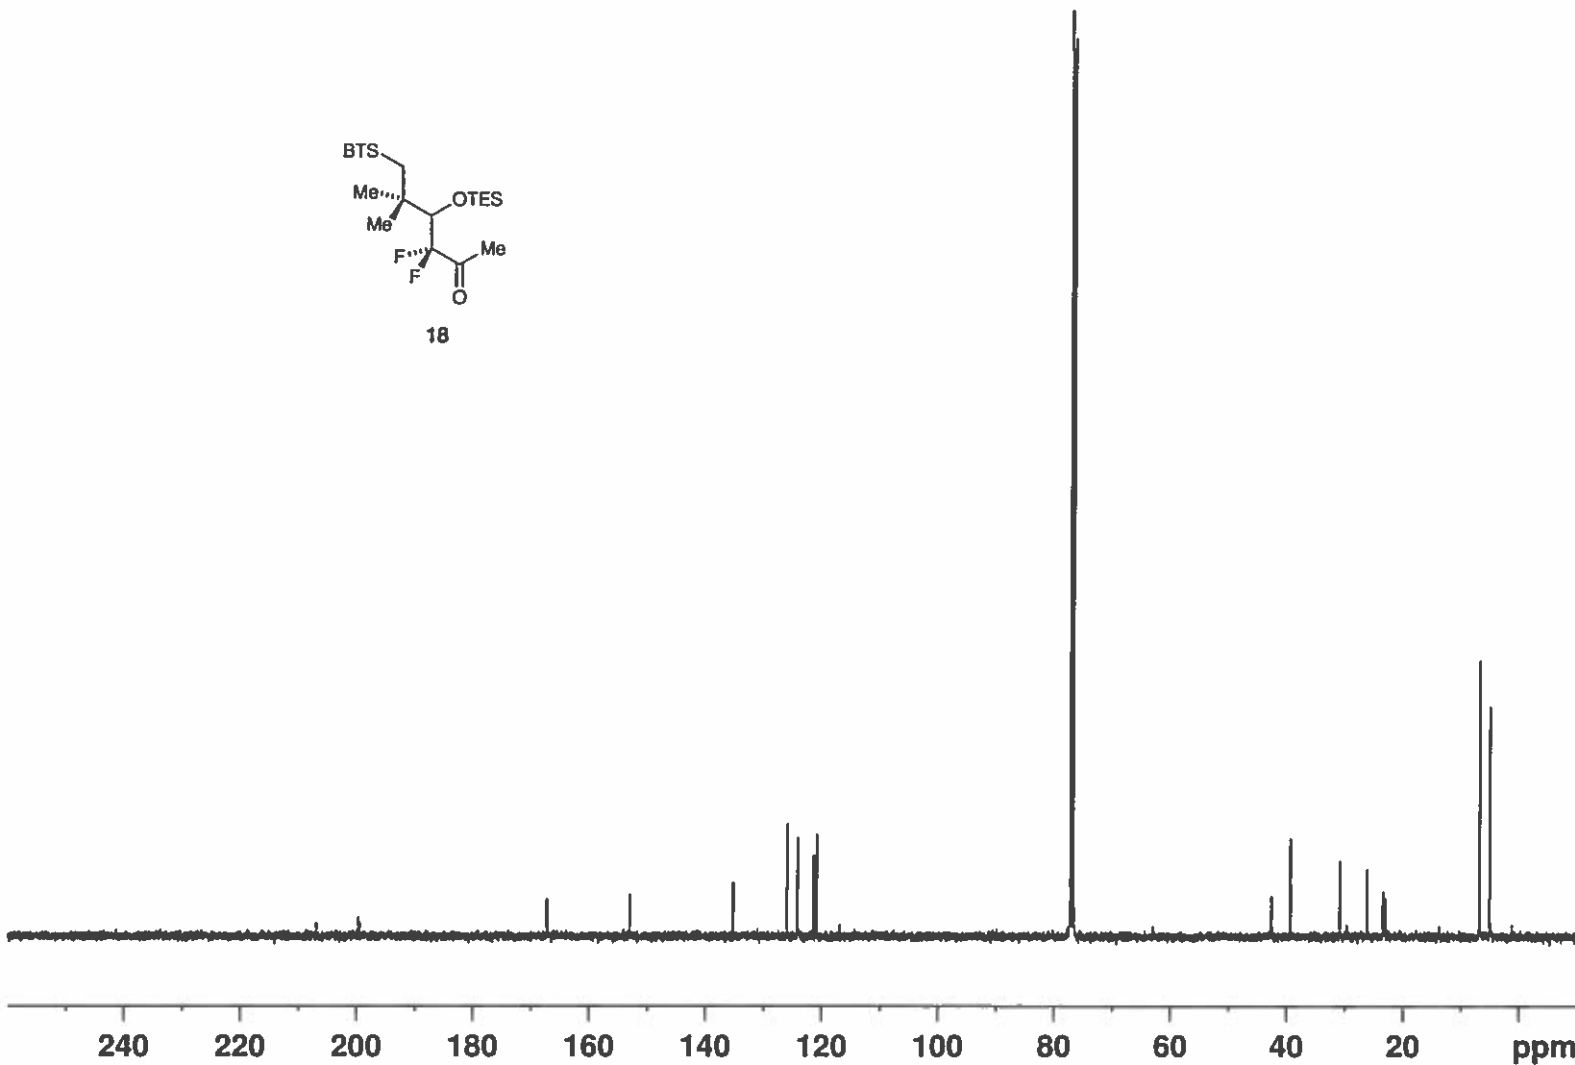

me ketone  
mF19CPD CDCl3 {e:\bruk400data\2012\Mar} ejt 38

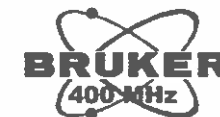

-101.59  
-102.30  
-105.55  
-106.25  
-107.20  
-107.92  
-108.72  
-109.43  
-110.37  
-111.09  
-111.79

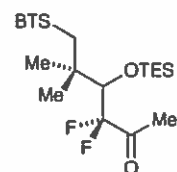

18

NAME 2012-03-01-ejt-38  
EXPNO 12  
PROCNO 1  
Date\_ 20120301  
Time\_ 14.23  
INSTRUM AV400  
PROBHD 5 mm PABBO BB-  
PULPROG zgig  
TD 131072  
SOLVENT CDCl3  
NS 16  
DS 4  
SWH 89285.711 Hz  
FIDRES 0.681196 Hz  
AQ 0.7340532 sec  
RG 4100  
DW 5.600 usec  
DE 7.51 usec  
TE 295.1 K  
D1 1.00000000 sec  
D11 0.03000000 sec  
TD0 1

===== CHANNEL f1 =====  
NUC1 19F  
P1 10.70 usec  
PL1 -5.00 dB  
PL1W 27.00716019 W  
SFO1 376.4607164 MHz

===== CHANNEL f2 =====  
CPDPRG2 waltz16  
NUC2 1H  
PCPD2 90.00 usec  
PL2 -3.60 dB  
PL12 15.31 dB  
PL2W 17.83863831 W  
PL12W 0.22927761 W  
SFO2 400.1316005 MHz  
SI 262144  
SF 376.4983660 MHz  
WDW EM  
SSB 0  
LB 0.30 Hz  
GB 0  
PC 2.00

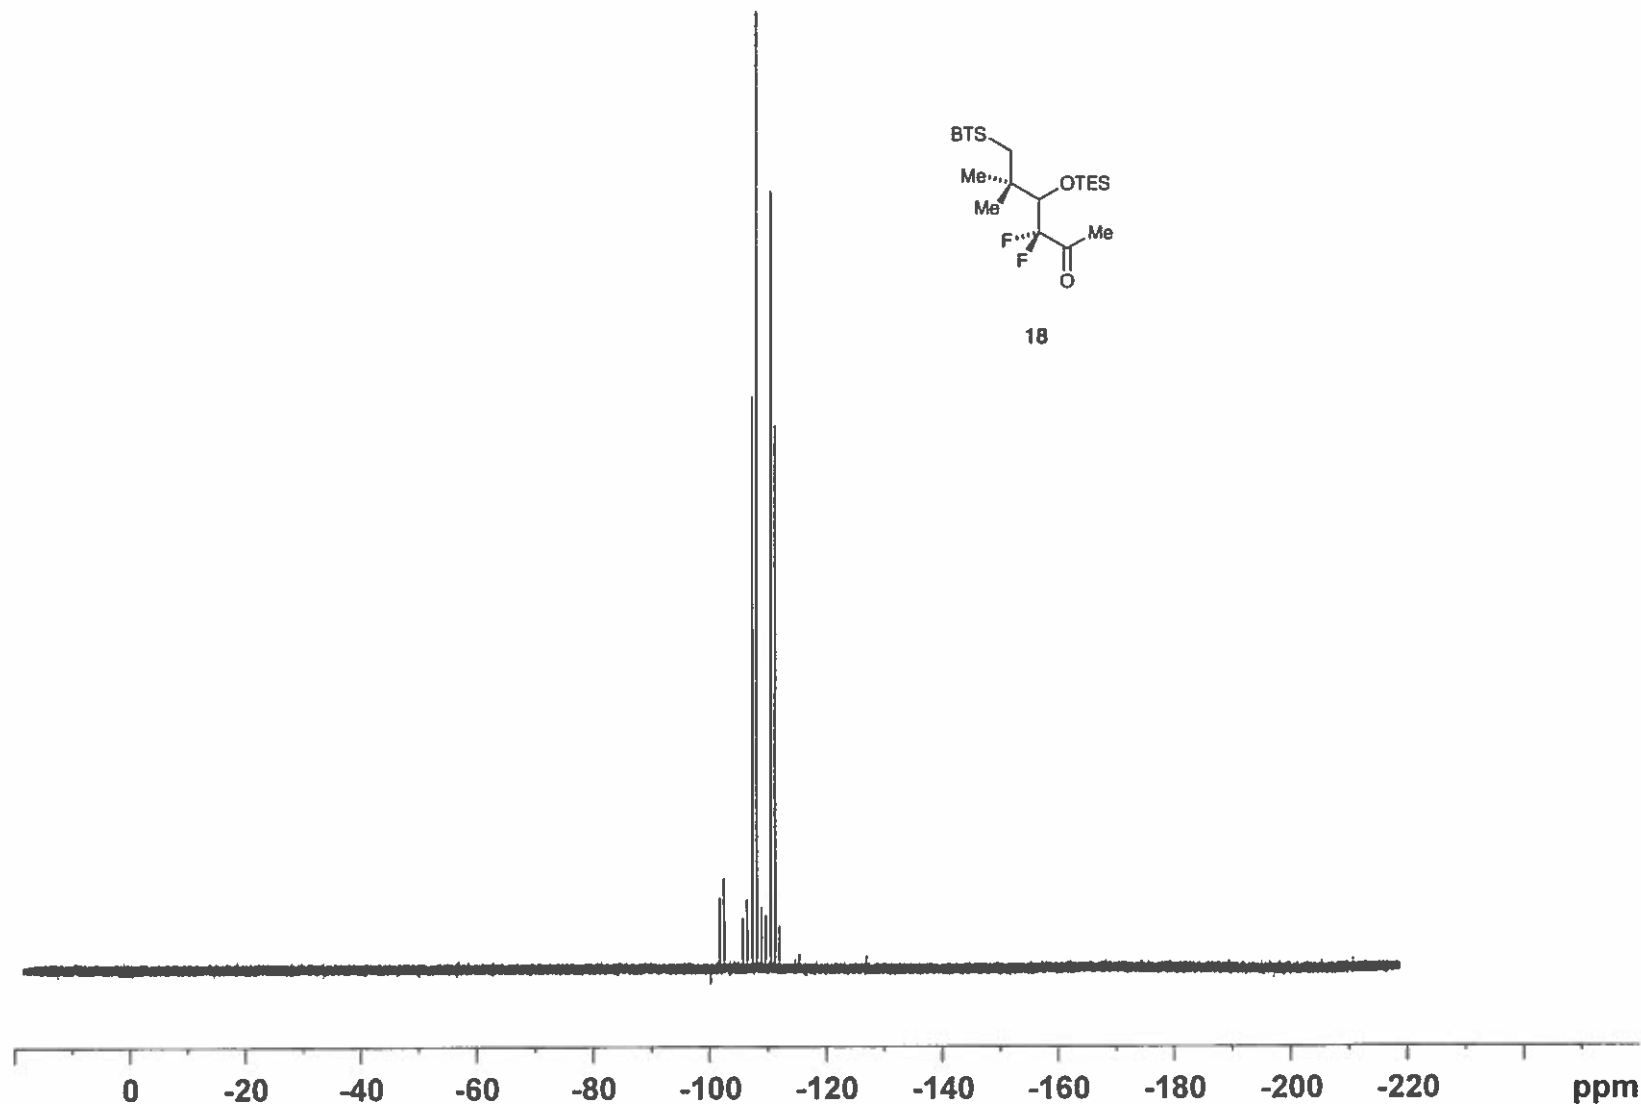

ejt cry wittig  
mPROTON CDCl3 /opt/bruk500data/2012/Apr ejt 31

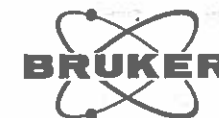

NAME 2012-04-03-ejt-31  
EXPNO 10  
PROCNO 1  
Date\_ 20120403  
Time 11.34  
INSTRUM spect  
PROBHD 5 mm PABBO BB-  
PULPROG zg30b  
TD 65536  
SOLVENT CDCl3  
NS 16  
DS 0  
SWH 10330.578 Hz  
FIDRES 0.157632 Hz  
AQ 3.1719923 sec  
RG 144  
DW 48.400 usec  
DE 13.00 usec  
TE 295.4 K  
D1 1.00000000 sec  
TD0 1

===== CHANNEL f1 =====  
NUC1 1H  
P1 10.00 usec  
PL1 -0.10 dB  
PL1W 26.21803665 W  
SF01 500.1330885 MHz  
SI 32768  
SF 500.1300489 MHz  
WDW EM  
SSB 0  
LB 0.30 Hz  
GB 0  
PC 1.00

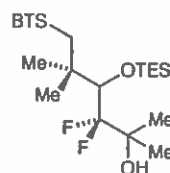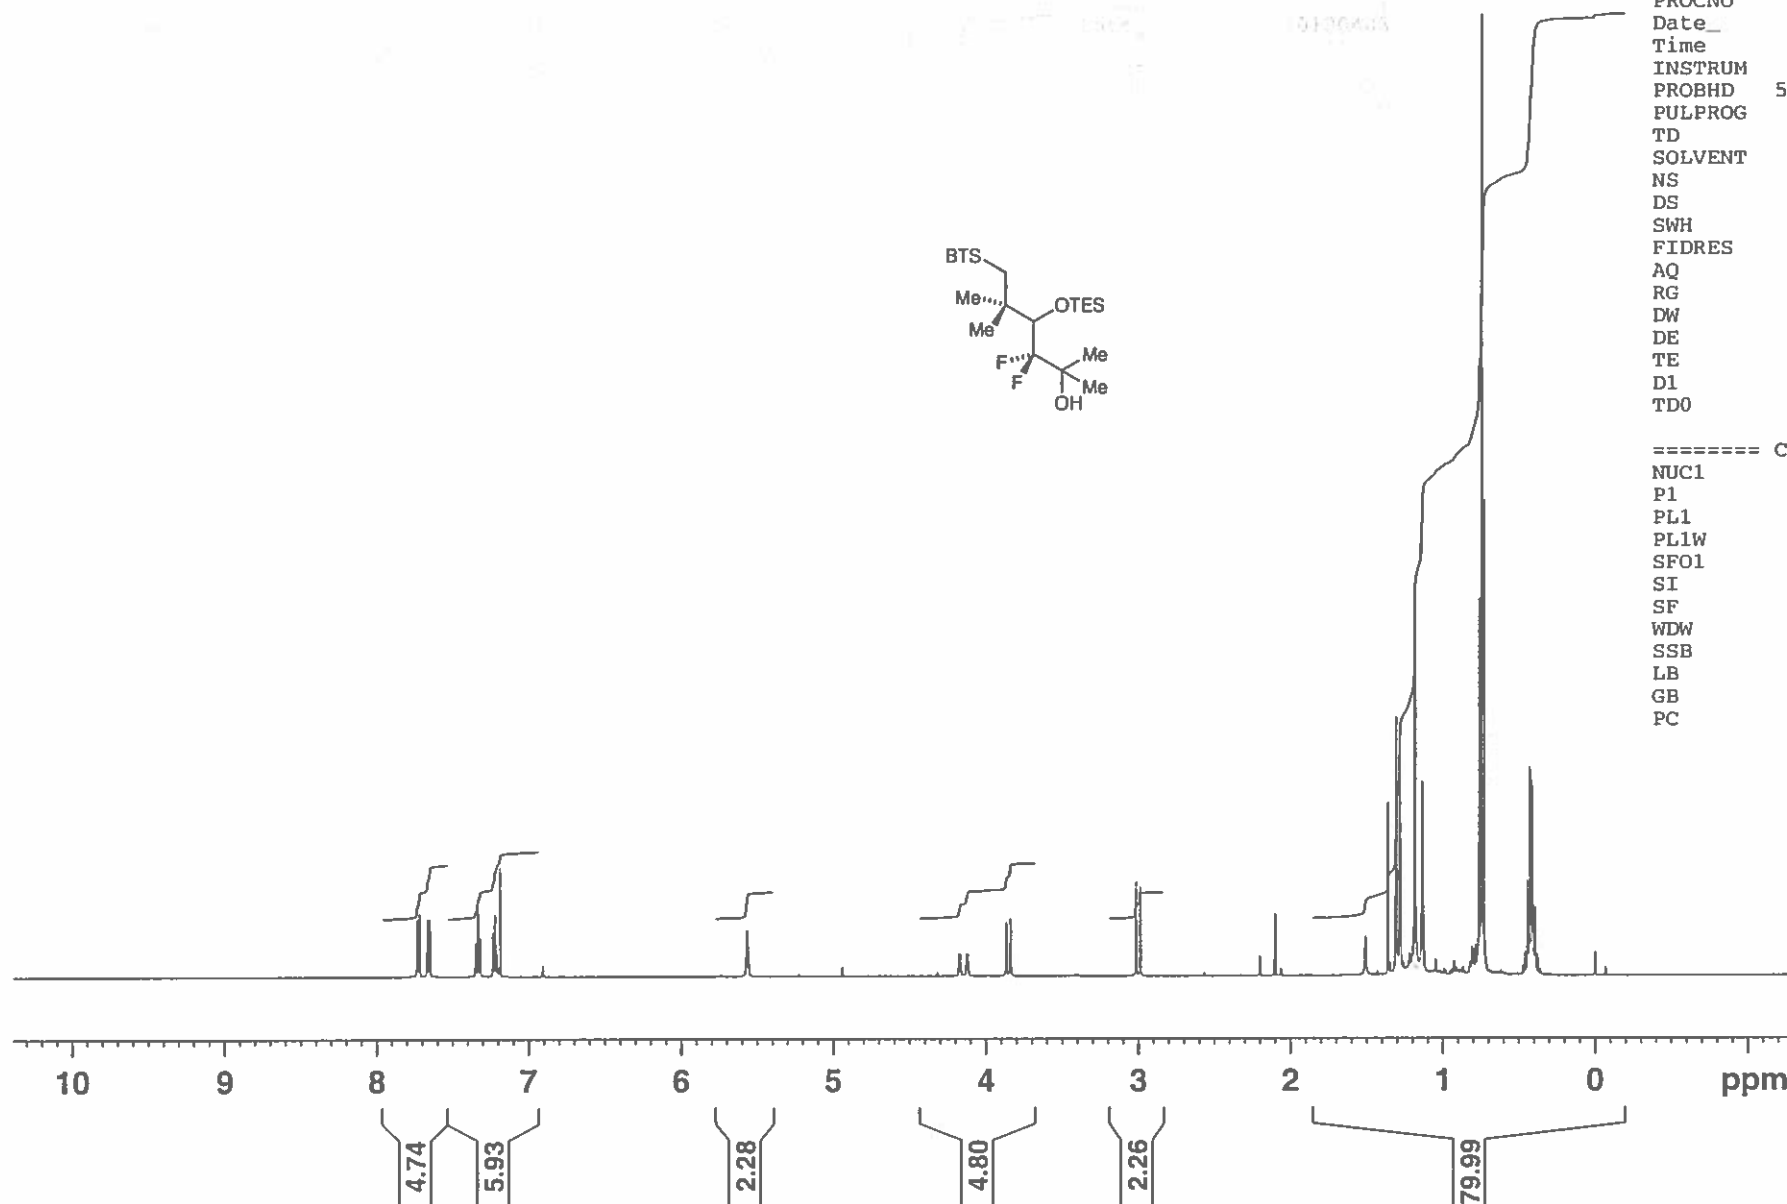



ejt cry mesylate r2  
 mF19 CDCl3 {e:\bruk400data\2012\Mar} ejt 60

-113.28  
 -113.00  
 -124.00  
 -124.10  
 -124.77  
 -124.77

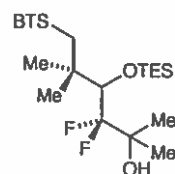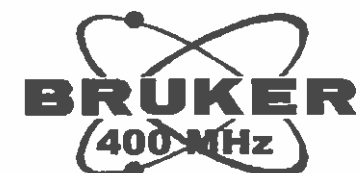

NAME 2012-03-30-ejt-60  
 EXPNO 10  
 PROCNO 1  
 Date\_ 20120330  
 Time\_ 17.57  
 INSTRUM AV400  
 PROBHD 5 mm PABBO BB-  
 PULPROG zg  
 TD 131072  
 SOLVENT CDCl3  
 NS 16  
 DS 4  
 SWH 89285.711 Hz  
 FIDRES 0.681196 Hz  
 AQ 0.7340532 sec  
 RG 4100  
 DW 5.600 usec  
 DE 11.01 usec  
 TE 295.1 K  
 D1 1.00000000 sec  
 TD0 1

===== CHANNEL f1 =====  
 NUC1 19F  
 P1 10.70 usec  
 PL1 -5.00 dB  
 PL1W 27.00716019 W  
 SFO1 376.4607164 MHz  
 SI 262144  
 SF 376.4983660 MHz  
 WDW EM  
 SSB 0  
 LB 0.30 Hz  
 GB 0  
 PC 2.00

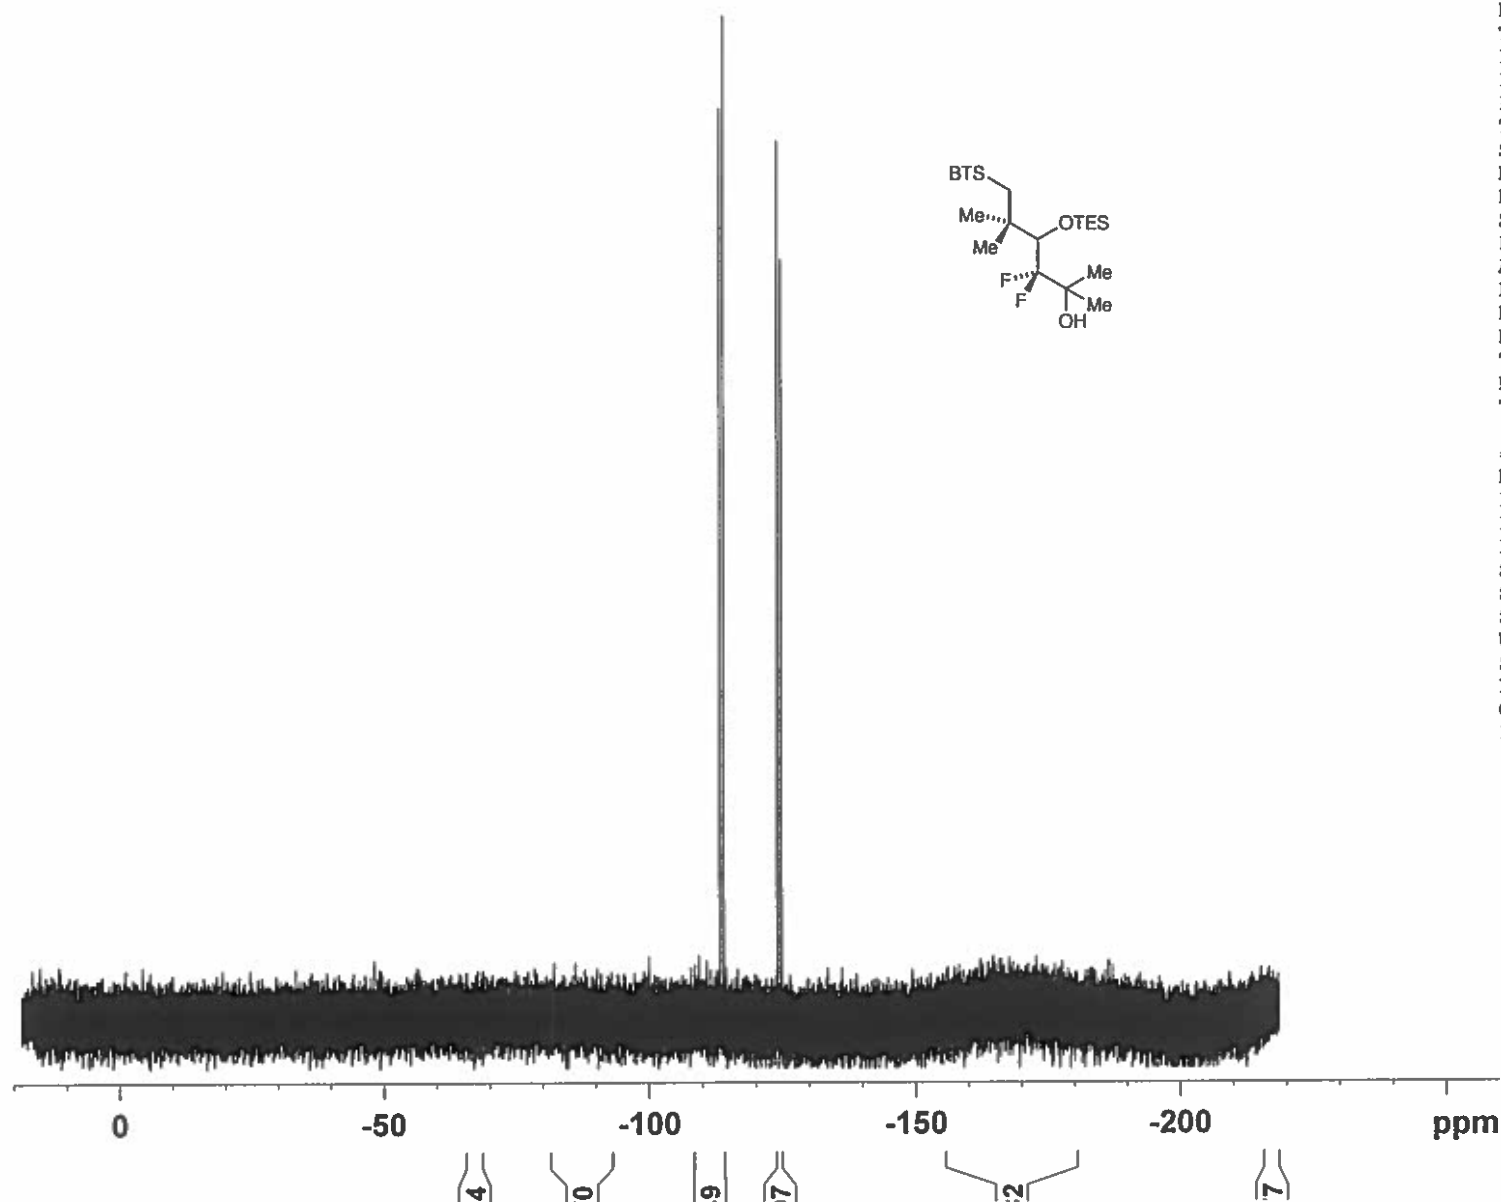

|                        |                                                                                                                |                        |                                                             |                      |                 |                       |          |
|------------------------|----------------------------------------------------------------------------------------------------------------|------------------------|-------------------------------------------------------------|----------------------|-----------------|-----------------------|----------|
| Acquisition Time (sec) | 3.9649                                                                                                         | Comment                | ejt cry meli mPROTON CDCl3 (e:\bruk400data\2012\Aug) ejt 15 |                      | Date            | 07 Aug 2012 16:04:32  |          |
| Date Stamp             | 07 Aug 2012 16:04:32                                                                                           |                        |                                                             |                      |                 |                       |          |
| File Name              | \\ss7a.ds.man.ac.uk\vol5\vol3\users\snmrdata\bruk400data\2012\Aug\data\ejt\nmr\2012-08-07-ejt-15\10\pdata\1\1r |                        |                                                             |                      | Frequency (MHz) | 400.13                |          |
| Nucleus                | 1H                                                                                                             | Number of Transients   | 16                                                          | Origin               | AV400           | Original Points Count | 32768    |
| Owner                  | Administrator                                                                                                  | Points Count           | 32768                                                       | Pulse Sequence       | zg30b           | Receiver Gain         | 57.00    |
| SW(cyclical) (Hz)      | 8264.46                                                                                                        | Solvent                | CHLOROFORM-d                                                | Spectrum Offset (Hz) | 2464.9272       | Spectrum Type         | STANDARD |
| Sweep Width (Hz)       | 8264.21                                                                                                        | Temperature (degree C) | 22.200                                                      |                      |                 |                       |          |

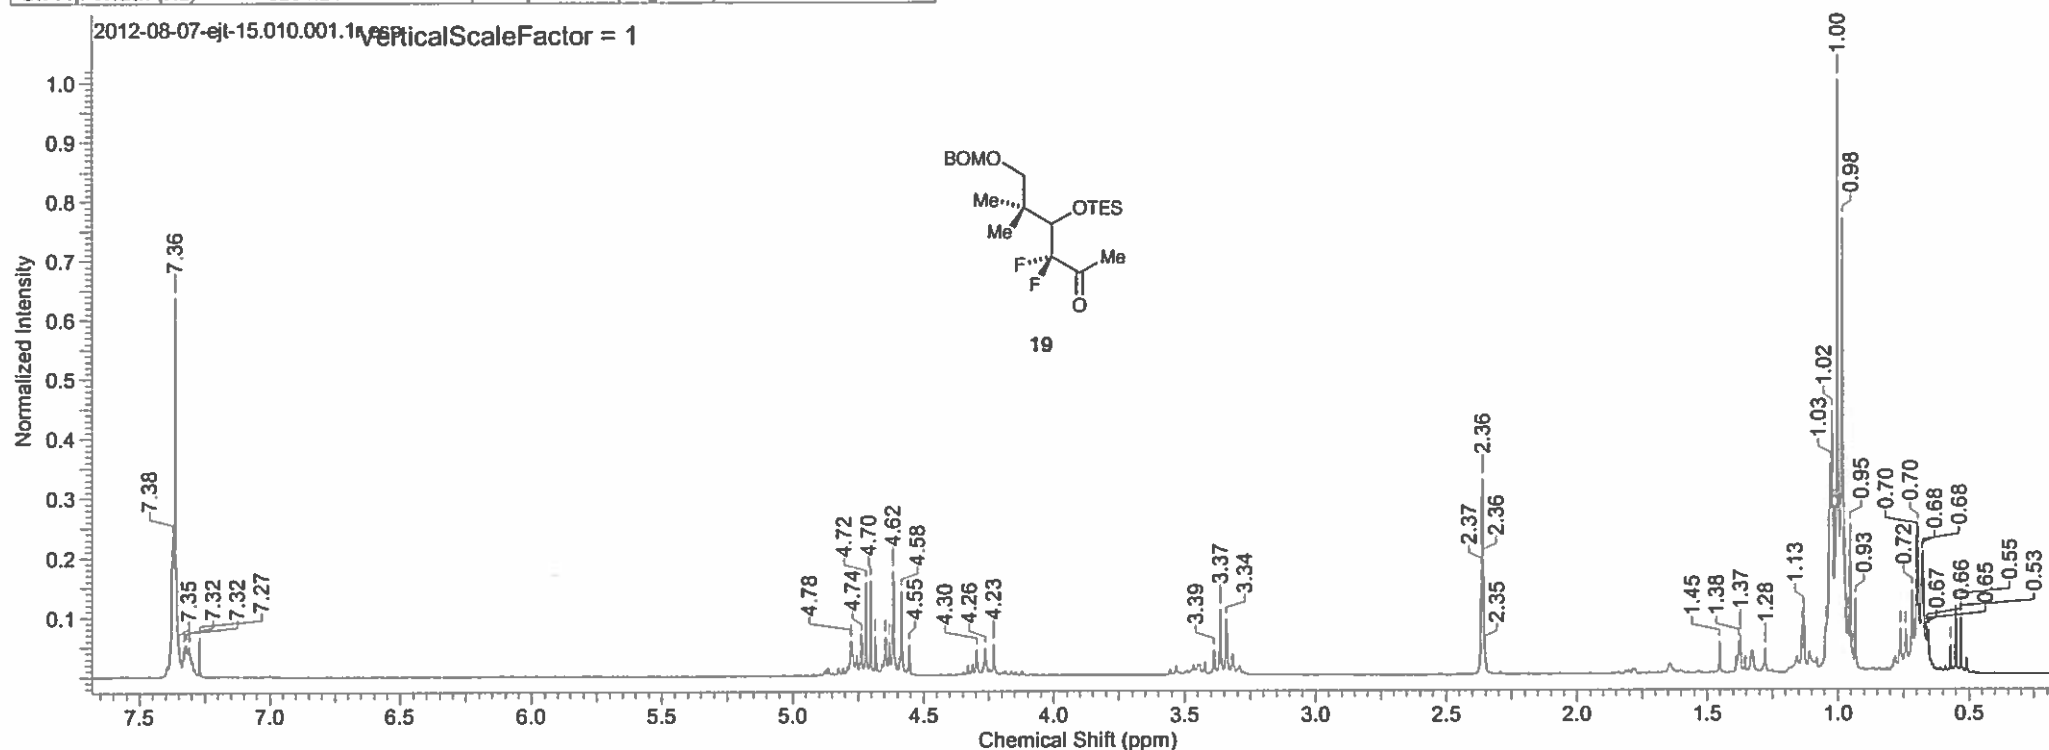

| No. | (ppm) | (Hz)  | Height | No. | (ppm) | (Hz)  | Height | No. | (ppm) | (Hz)  | Height | No. | (ppm) | (Hz)   | Height |
|-----|-------|-------|--------|-----|-------|-------|--------|-----|-------|-------|--------|-----|-------|--------|--------|
| 1   | 0.53  | 212.0 | 0.0952 | 12  | 0.71  | 282.9 | 0.0629 | 23  | 1.00  | 400.7 | 1.0000 | 34  | 1.45  | 581.3  | 0.0545 |
| 2   | 0.55  | 220.1 | 0.1146 | 13  | 0.72  | 287.2 | 0.1403 | 24  | 1.01  | 404.7 | 0.2829 | 35  | 2.35  | 941.7  | 0.0446 |
| 3   | 0.57  | 228.2 | 0.0492 | 14  | 0.74  | 296.8 | 0.0743 | 25  | 1.02  | 408.8 | 0.4415 | 36  | 2.36  | 943.5  | 0.1913 |
| 4   | 0.65  | 262.0 | 0.0748 | 15  | 0.76  | 304.9 | 0.0762 | 26  | 1.03  | 410.5 | 0.2809 | 37  | 2.36  | 945.2  | 0.3289 |
| 5   | 0.66  | 264.3 | 0.0802 | 16  | 0.93  | 373.5 | 0.1267 | 27  | 1.03  | 412.1 | 0.3534 | 38  | 2.37  | 946.7  | 0.1756 |
| 6   | 0.67  | 266.8 | 0.0663 | 17  | 0.94  | 377.2 | 0.0432 | 28  | 1.04  | 417.9 | 0.0848 | 39  | 3.34  | 1337.2 | 0.0945 |
| 7   | 0.68  | 270.3 | 0.2067 | 18  | 0.95  | 381.3 | 0.2509 | 29  | 1.13  | 451.9 | 0.0942 | 40  | 3.37  | 1346.5 | 0.1099 |
| 8   | 0.68  | 272.1 | 0.2004 | 19  | 0.96  | 385.1 | 0.0987 | 30  | 1.13  | 453.4 | 0.1088 | 41  | 3.39  | 1355.8 | 0.0427 |
| 9   | 0.69  | 275.1 | 0.0892 | 20  | 0.97  | 389.4 | 0.1997 | 31  | 1.28  | 511.2 | 0.0430 | 42  | 4.23  | 1692.8 | 0.0518 |
| 10  | 0.70  | 278.6 | 0.2478 | 21  | 0.98  | 392.9 | 0.7667 | 32  | 1.37  | 549.0 | 0.0650 | 43  | 4.26  | 1706.1 | 0.0454 |
| 11  | 0.70  | 279.6 | 0.2340 | 22  | 0.99  | 396.9 | 0.2736 | 33  | 1.38  | 552.0 | 0.0558 | 44  | 4.30  | 1719.0 | 0.0431 |

|    |      |        |        |
|----|------|--------|--------|
| 45 | 4.55 | 1822.4 | 0.0519 |
| 46 | 4.58 | 1834.0 | 0.1428 |
| 47 | 4.62 | 1846.9 | 0.1761 |
| 48 | 4.63 | 1853.2 | 0.0599 |
| 49 | 4.65 | 1858.7 | 0.0647 |
| 50 | 4.69 | 1874.6 | 0.0660 |
| 51 | 4.70 | 1881.2 | 0.1598 |
| 52 | 4.72 | 1888.5 | 0.1570 |
| 53 | 4.74 | 1895.1 | 0.0676 |
| 54 | 4.74 | 1896.8 | 0.0426 |
| 55 | 4.78 | 1910.7 | 0.0575 |

|                        |                                                                                                                 |                        |                                                                  |                      |            |                       |                      |
|------------------------|-----------------------------------------------------------------------------------------------------------------|------------------------|------------------------------------------------------------------|----------------------|------------|-----------------------|----------------------|
| Acquisition Time (sec) | 1.0835                                                                                                          | Comment                | ejt cry meli mCARBONnight CDCI3 (e:\bruk400data\2012\Aug)\ejt 15 |                      |            | Date                  | 08 Aug 2012 01:51:12 |
| Date Stamp             | 08 Aug 2012 01:51:12                                                                                            |                        |                                                                  |                      |            |                       |                      |
| File Name              | \\ss7a.ds.man.ac.uk\vol5\vol3\users\snmrdata\bruk400data\2012\Aug\data\ejt\snmr\2012-08-07-ejt-15\22\pdata\1\1r |                        |                                                                  |                      |            | Frequency (MHz)       | 100.61               |
| Nucleus                | 13C                                                                                                             | Number of Transients   | 1000                                                             | Origin               | AV400      | Original Points Count | 32768                |
| Owner                  | Administrator                                                                                                   | Points Count           | 32768                                                            | Pulse Sequence       | zgpg30     | Receiver Gain         | 512.00               |
| SW(cyclical) (Hz)      | 30241.94                                                                                                        | Solvent                | CHLOROFORM-d                                                     | Spectrum Offset (Hz) | 11330.3838 | Spectrum Type         | STANDARD             |
| Sweep Width (Hz)       | 30241.01                                                                                                        | Temperature (degree C) | 23.100                                                           |                      |            |                       |                      |

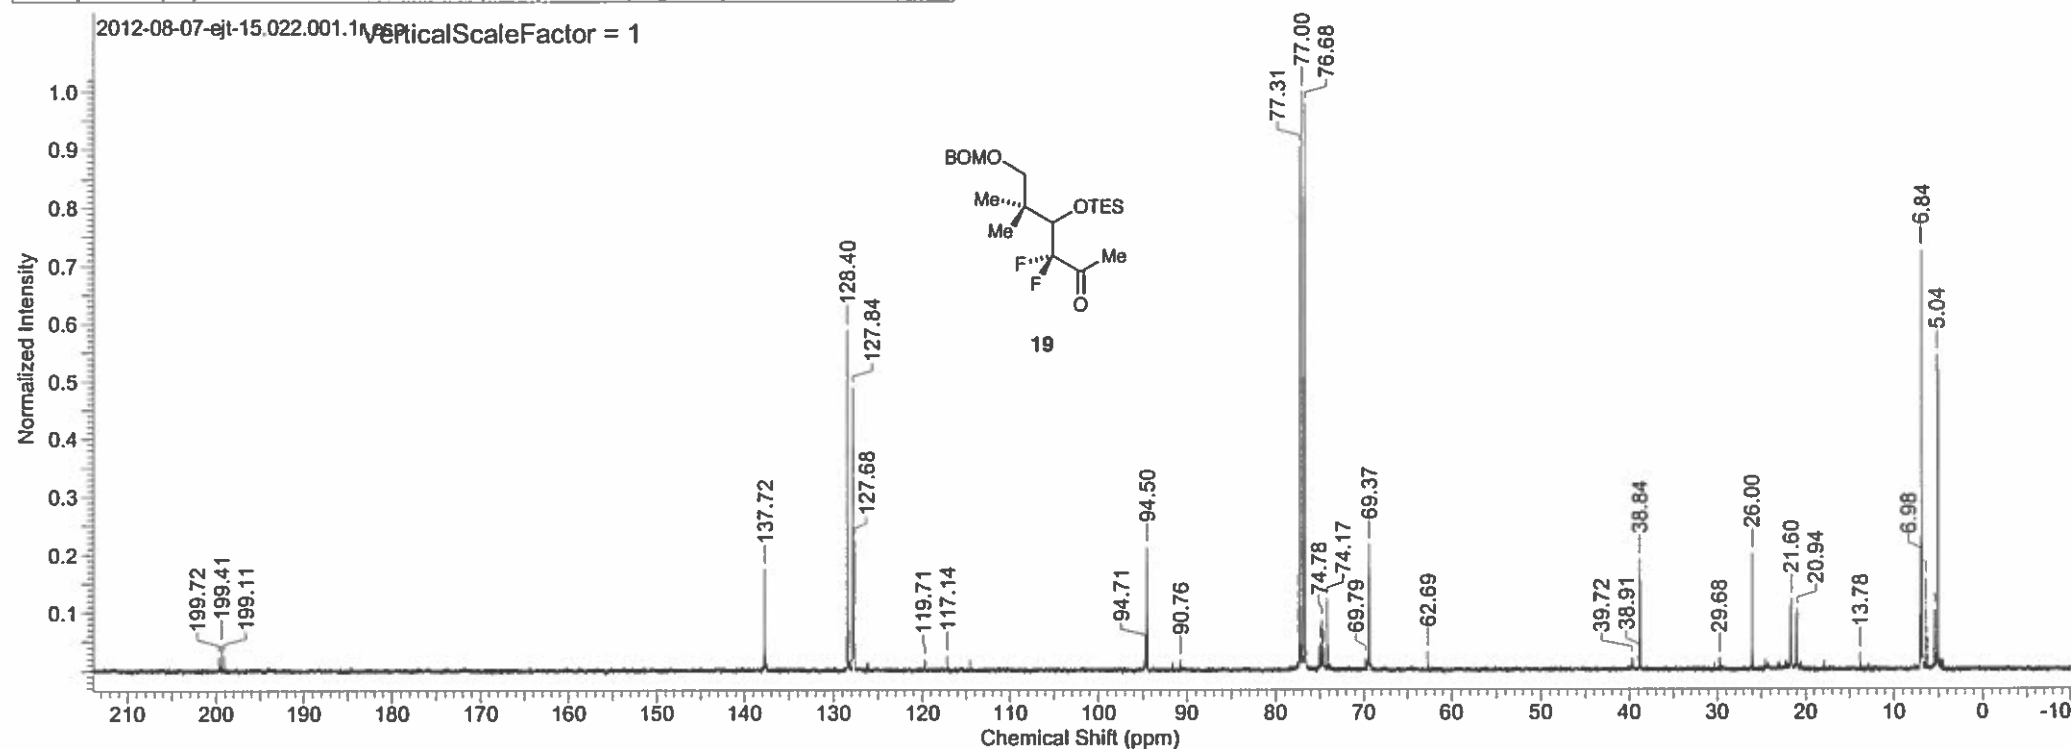

| No. | (ppm) | (Hz)  | Height | No. | (ppm) | (Hz)   | Height | No. | (ppm) | (Hz)   | Height | No. | (ppm)  | (Hz)    | Height |
|-----|-------|-------|--------|-----|-------|--------|--------|-----|-------|--------|--------|-----|--------|---------|--------|
| 1   | 5.04  | 506.9 | 0.5443 | 11  | 13.78 | 1386.5 | 0.0286 | 21  | 69.31 | 6973.8 | 0.0433 | 31  | 77.00  | 7747.2  | 1.0000 |
| 2   | 5.40  | 542.9 | 0.1020 | 12  | 20.94 | 2107.3 | 0.1033 | 22  | 69.37 | 6979.3 | 0.2156 | 32  | 77.31  | 7778.6  | 0.9035 |
| 3   | 5.47  | 550.3 | 0.0425 | 13  | 21.12 | 2124.8 | 0.0187 | 23  | 69.45 | 6987.6 | 0.0507 | 33  | 90.76  | 9131.5  | 0.0177 |
| 4   | 6.26  | 629.7 | 0.0241 | 14  | 21.60 | 2172.8 | 0.1212 | 24  | 69.79 | 7021.8 | 0.0204 | 34  | 94.50  | 9508.1  | 0.2119 |
| 5   | 6.38  | 641.7 | 0.1556 | 15  | 26.00 | 2615.8 | 0.1999 | 25  | 74.17 | 7462.0 | 0.1225 | 35  | 94.68  | 9525.6  | 0.0300 |
| 6   | 6.74  | 678.6 | 0.0747 | 16  | 29.68 | 2985.9 | 0.0199 | 26  | 74.54 | 7499.8 | 0.0398 | 36  | 94.71  | 9529.3  | 0.0407 |
| 7   | 6.77  | 681.4 | 0.1883 | 17  | 38.84 | 3907.9 | 0.1899 | 27  | 74.63 | 7509.1 | 0.0360 | 37  | 117.14 | 11785.8 | 0.0240 |
| 8   | 6.80  | 684.1 | 0.1352 | 18  | 38.91 | 3915.3 | 0.0243 | 28  | 74.78 | 7523.8 | 0.0857 | 38  | 119.71 | 12044.3 | 0.0187 |
| 9   | 6.84  | 687.8 | 0.7244 | 19  | 39.72 | 3996.5 | 0.0196 | 29  | 75.02 | 7547.8 | 0.0449 | 39  | 127.68 | 12846.3 | 0.2237 |
| 10  | 6.98  | 702.6 | 0.1890 | 20  | 62.69 | 6307.4 | 0.0302 | 30  | 76.68 | 7714.9 | 0.9789 | 40  | 127.82 | 12860.1 | 0.2858 |

| No. | (ppm)  | (Hz)    | Height |
|-----|--------|---------|--------|
| 41  | 127.84 | 12862.0 | 0.4885 |
| 42  | 127.93 | 12871.2 | 0.0317 |
| 43  | 128.40 | 12918.3 | 0.5878 |
| 44  | 137.72 | 13856.9 | 0.1744 |
| 45  | 137.80 | 13864.2 | 0.0260 |
| 46  | 199.11 | 20033.0 | 0.0260 |
| 47  | 199.41 | 20063.4 | 0.0447 |
| 48  | 199.72 | 20093.9 | 0.0240 |



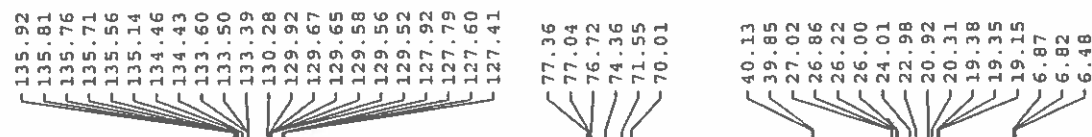

```

NAME          2012-09-28-ejt-20
EXPNO              13
PROCNO          1
Date_            20120929
Time              10.56
INSTRUM          AV400
PROBHD           5 mm PABBO BB-
PULPROG          zgpg30
TD               65536
SOLVENT          CDC13
NS               256
DS               2
SWH              30241.936 Hz
FIDRES          0.461455 Hz
AQ              1.0835786 sec
RG              512
DW              16.533 usec
DE              7.83 usec
TE              295.4 K
D1              2.00000000 sec
D11             0.03000000 sec
TD0             1

```

```
===== CHANNEL f1 =====
NUC1          13C
P1             8.00 usec
PL1            0.00 dB
PL1W          34.9152217 W
SFO1          100.6241042 MHz
```

```

***** CHANNEL f2 *****
CPDPRG2          waltz16
NUC2              1H
PCPD2            90.00 usec
PL2              -3.60 dB
PL12             15.31 dB
PL13             18.00 dB
PL2W             17.83863831 W
PL12W            0.22927761 W
PL13W            0.12341322 W
SFO2             400.1316005 MHz
SI               32768
SF              100.6127690 MHz
WDW              EM
SSB              0
LB               1.00 Hz
GB               0
PC               1.40

```

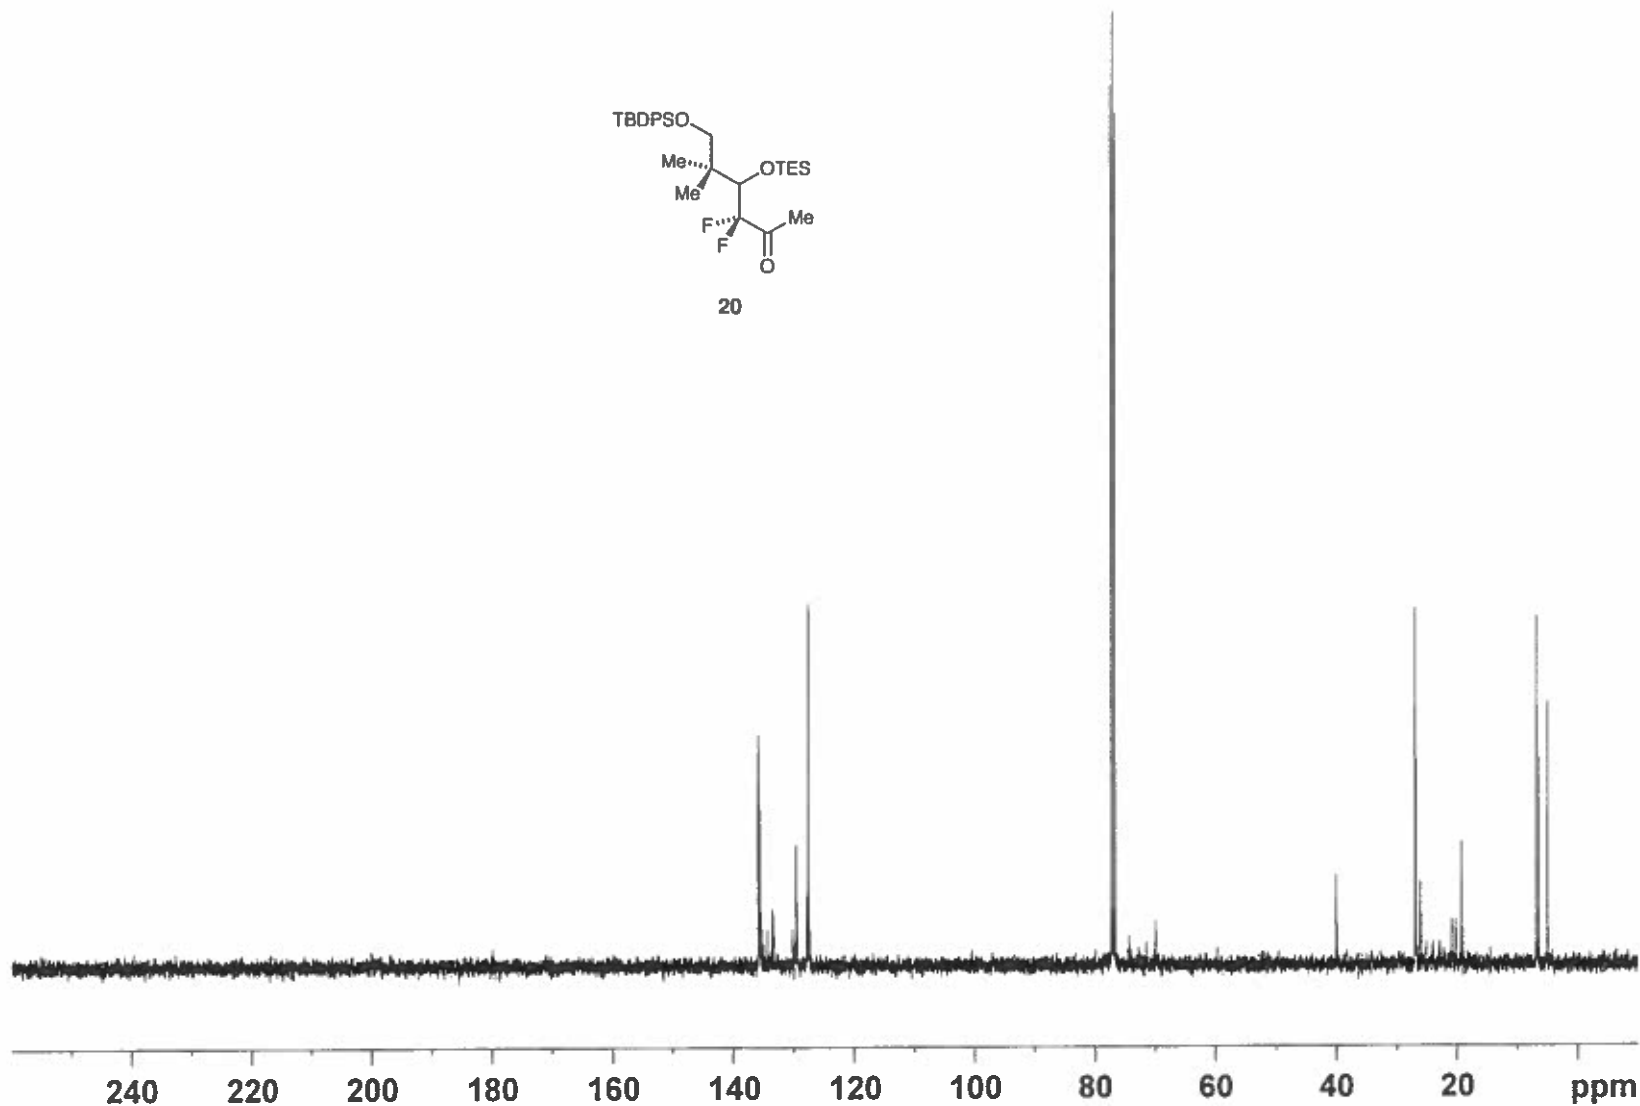

2012-08-06-jl-15.010.001.1.msp | VerticalScaleFactor = 1 | 69

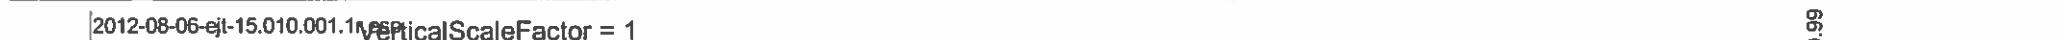

| No. | (ppm) | (Hz)  | Height | No. | (ppm) | (Hz)  | Height | No. | (ppm) | (Hz)   | Height | No. | (ppm) | (Hz)   | Height | No. | (ppm) | (Hz)   | Height |
|-----|-------|-------|--------|-----|-------|-------|--------|-----|-------|--------|--------|-----|-------|--------|--------|-----|-------|--------|--------|
| 1   | 0.65  | 327.6 | 0.0833 | 10  | 0.96  | 481.7 | 0.0726 | 19  | 3.30  | 1649.5 | 0.0662 | 28  | 4.63  | 2314.0 | 0.1497 | 37  | 7.31  | 3654.5 | 0.0471 |
| 2   | 0.66  | 330.7 | 0.0898 | 11  | 0.98  | 487.7 | 0.9220 | 20  | 3.32  | 1658.6 | 0.0885 | 29  | 4.65  | 2325.7 | 0.0829 | 38  | 7.31  | 3657.7 | 0.0381 |
| 3   | 0.67  | 335.8 | 0.2117 | 12  | 0.99  | 495.3 | 1.0000 | 21  | 3.42  | 1709.4 | 0.1050 | 30  | 4.73  | 2365.7 | 0.0640 | 39  | 7.32  | 3659.6 | 0.0439 |
| 4   | 0.68  | 338.6 | 0.2200 | 13  | 1.01  | 503.5 | 0.4271 | 22  | 3.44  | 1718.5 | 0.0793 | 31  | 4.74  | 2372.4 | 0.1916 | 40  | 7.32  | 3663.1 | 0.0375 |
| 5   | 0.69  | 344.0 | 0.2262 | 14  | 1.03  | 517.4 | 0.3013 | 23  | 4.02  | 2012.3 | 0.0466 | 32  | 4.75  | 2377.7 | 0.1894 | 41  | 7.35  | 3676.0 | 0.0414 |
| 6   | 0.69  | 346.2 | 0.2280 | 15  | 1.27  | 632.7 | 0.0427 | 24  | 4.05  | 2023.1 | 0.0813 | 33  | 4.77  | 2384.3 | 0.0667 | 42  | 7.36  | 3681.0 | 0.6262 |
| 7   | 0.70  | 352.2 | 0.0968 | 16  | 1.44  | 722.6 | 0.1420 | 25  | 4.07  | 2033.8 | 0.0442 | 34  | 5.15  | 2575.1 | 0.0948 | 43  | 7.37  | 3684.5 | 0.2032 |
| 8   | 0.71  | 354.0 | 0.1020 | 17  | 1.59  | 794.5 | 0.0578 | 26  | 4.56  | 2281.3 | 0.0744 | 35  | 5.40  | 2701.8 | 0.0979 | 44  | 7.37  | 3686.1 | 0.2121 |
| 9   | 0.95  | 474.8 | 0.0435 | 18  | 1.91  | 956.8 | 0.3996 | 27  | 4.58  | 2292.9 | 0.1522 | 36  | 7.27  | 3635.9 | 0.2110 |     |       |        |        |

| No. | (ppm) | (Hz)   | Height | No. | (ppm) | (Hz)   | Height | No. | (ppm)  | (Hz)    | Height | No. | (ppm)  | (Hz)    | Height | No. | (ppm)  | (Hz)    | Height |
|-----|-------|--------|--------|-----|-------|--------|--------|-----|--------|---------|--------|-----|--------|---------|--------|-----|--------|---------|--------|
| 1   | 5.04  | 633.4  | 0.2561 | 8   | 21.14 | 2657.9 | 0.0346 | 15  | 76.75  | 9651.6  | 0.9667 | 22  | 116.22 | 14616.1 | 0.0151 | 29  | 127.99 | 16095.7 | 0.0101 |
| 2   | 6.41  | 806.0  | 0.0136 | 9   | 30.29 | 3808.7 | 0.0208 | 16  | 76.86  | 9666.1  | 0.0343 | 23  | 119.29 | 15002.1 | 0.0117 | 30  | 128.40 | 16147.4 | 0.1971 |
| 3   | 6.76  | 849.6  | 0.0164 | 10  | 38.81 | 4880.5 | 0.0501 | 17  | 77.00  | 9683.3  | 1.0000 | 24  | 121.26 | 15249.2 | 0.0223 | 31  | 137.87 | 17338.2 | 0.0763 |
| 4   | 6.95  | 874.1  | 0.3625 | 11  | 69.25 | 8708.8 | 0.1144 | 18  | 77.25  | 9715.1  | 0.9716 | 25  | 123.22 | 15496.2 | 0.0117 | 32  | 140.40 | 17657.0 | 0.0125 |
| 5   | 19.05 | 2395.5 | 0.0298 | 12  | 75.02 | 9434.5 | 0.0423 | 19  | 94.74  | 11914.0 | 0.0742 | 26  | 127.66 | 16054.8 | 0.1289 | 33  | 140.59 | 17680.6 | 0.0279 |
| 6   | 19.07 | 2398.2 | 0.0512 | 13  | 76.41 | 9609.8 | 0.0225 | 20  | 116.08 | 14598.0 | 0.0146 | 27  | 127.74 | 16064.8 | 0.0119 | 34  | 140.78 | 17704.2 | 0.0156 |
| 7   | 20.60 | 2590.7 | 0.0517 | 14  | 76.64 | 9637.9 | 0.0394 | 21  | 116.15 | 14607.0 | 0.0313 | 28  | 127.84 | 16076.6 | 0.2612 |     |        |         |        |

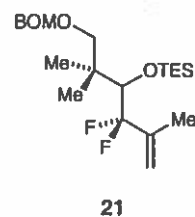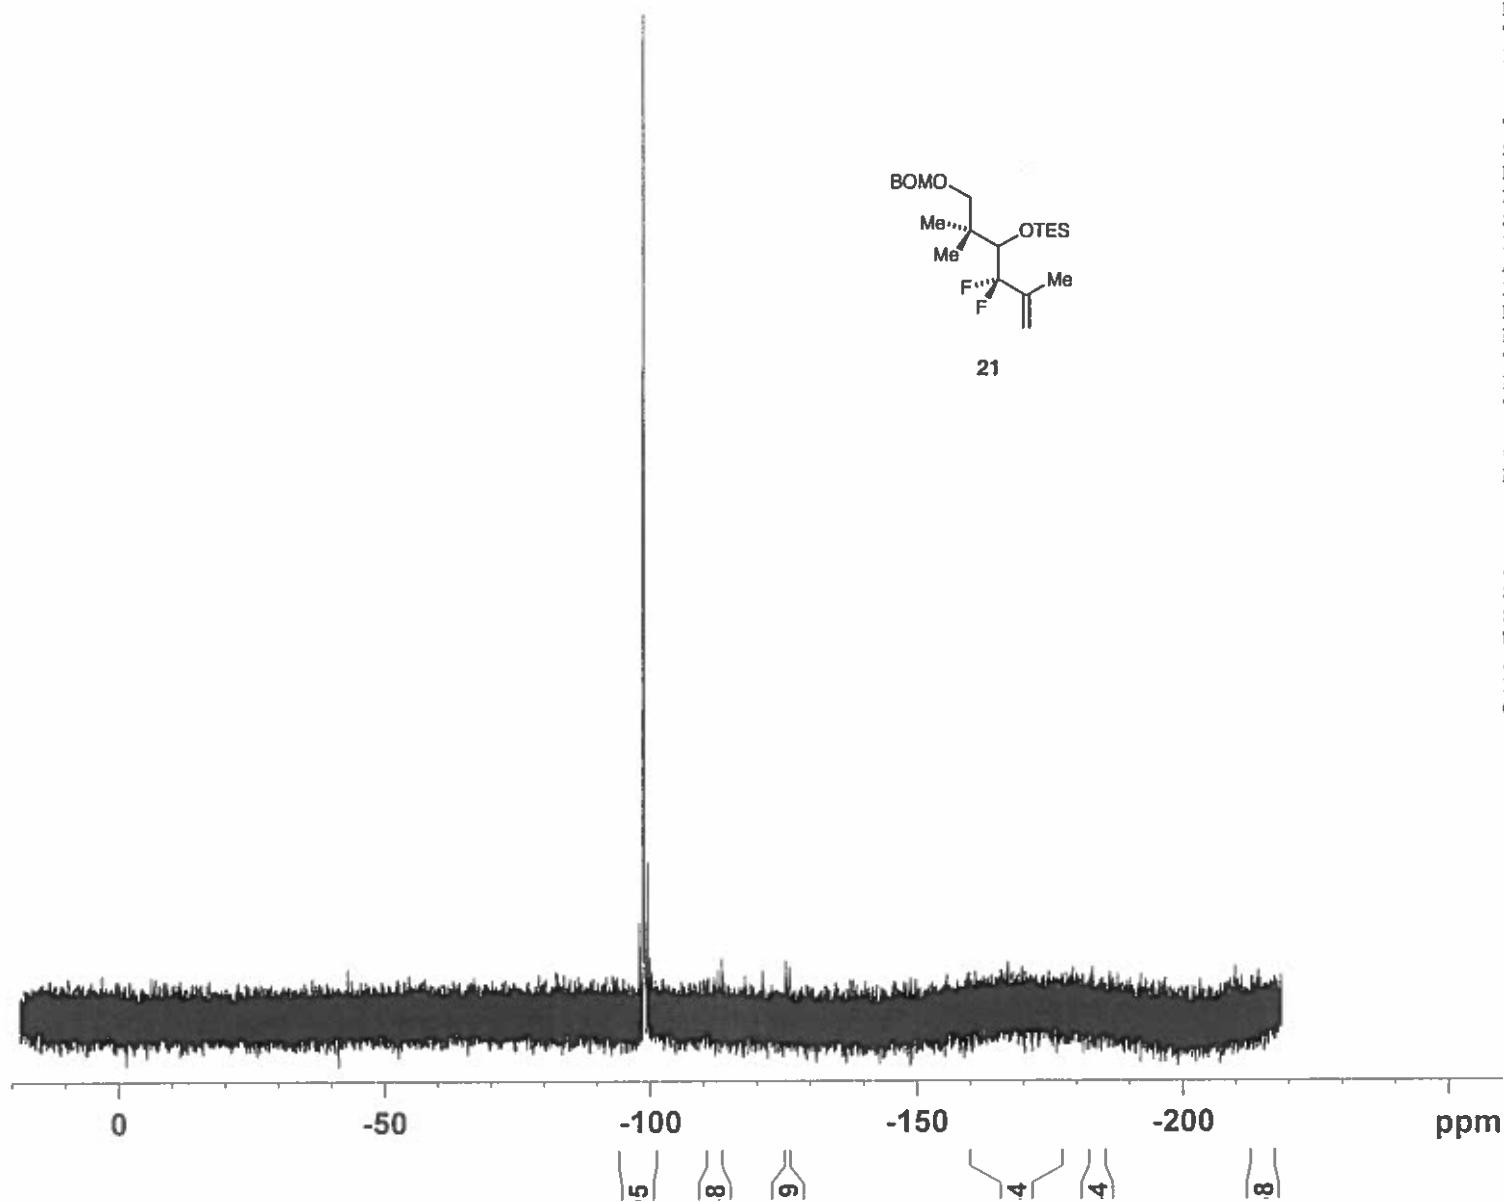

|         |                   |      |
|---------|-------------------|------|
| NAME    | 2012-08-07-ejt-14 |      |
| EXPNO   | 10                |      |
| PROCNO  | 1                 |      |
| Date    | 20120807          |      |
| Time    | 15.57             |      |
| INSTRUM | AV400             |      |
| PROBHD  | 5 mm PABBO BB-    |      |
| PULPROG | zg                |      |
| TD      | 131072            |      |
| SOLVENT | CDC13             |      |
| NS      | 16                |      |
| DS      | 4                 |      |
| SWH     | 89285.711         | Hz   |
| FIDRES  | 0.681196          | Hz   |
| AQ      | 0.7340532         | sec  |
| RG      | 4100              |      |
| DW      | 5.600             | usec |
| DE      | 11.01             | usec |
| TE      | 295.2             | K    |
| D1      | 1.00000000        | sec  |
| TD0     | 1                 |      |

```

===== CHANNEL f1 =====
NUC1                19F
P1                  10.70  usec
PL1                 -5.00  dB
PL1W                27.00716019 W
SFO1                376.4607164 MHz
SI                  262144
SF                  376.4983660 MHz
WDW                  EM
SSB                  0
LB                   0.30  Hz
GB                   0
PC                   2.00

```



|                        |                                                                                                                |                        |                                                                    |                      |                 |                       |          |
|------------------------|----------------------------------------------------------------------------------------------------------------|------------------------|--------------------------------------------------------------------|----------------------|-----------------|-----------------------|----------|
| Acquisition Time (sec) | 3.9649                                                                                                         | Comment                | ejt cry wittig mPROTONnight CDCI3 (e:\bruk400data\2012\Sep) ejt 47 |                      | Date            | 23 Sep 2012 05:48:00  |          |
| Date Stamp             | 23 Sep 2012 05:48:00                                                                                           |                        |                                                                    |                      |                 |                       |          |
| File Name              | \\ss7a.ds.man.ac.uk\vol5\vol3\users\snmr\data\bruk400data\2012\Sep\data\ejt\nmr\2012-09-21-ejt-47\10\data\1\1r |                        |                                                                    |                      | Frequency (MHz) | 400.13                |          |
| Nucleus                | 1H                                                                                                             | Number of Transients   | 16                                                                 | Origin               | AV400           | Original Points Count | 32768    |
| Owner                  | Administrator                                                                                                  | Points Count           | 32768                                                              | Pulse Sequence       | zg30b           | Receiver Gain         | 40.30    |
| SW(cyclical) (Hz)      | 8264.46                                                                                                        | Solvent                | CHLOROFORM-d                                                       | Spectrum Offset (Hz) | 2464.9272       | Spectrum Type         | STANDARD |
| Sweep Width (Hz)       | 8264.21                                                                                                        | Temperature (degree C) | 21.200                                                             |                      |                 |                       |          |

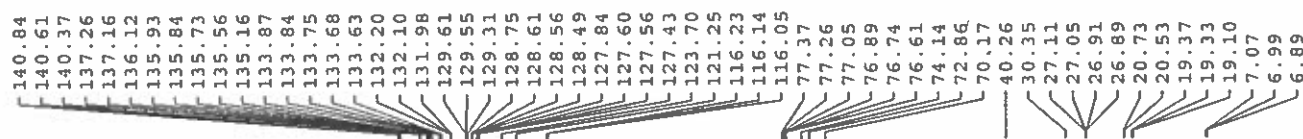

```

NAME      2012-09-21-ejt-47
EXPNO          11
PROCNO        1
Date_          20120923
Time          6.40
INSTRUM       AV400
PROBHD        5 mm PABBO BB-
PULPROG       zgpg30
TD            65536
SOLVENT       CDC13
NS            1000
DS            2
SWH           30241.936 Hz
FIDRES        0.461455 Hz
AQ            1.0835786 sec
RG            512
DW            16.533 usec
DE            7.83 usec
TE            294.9 K
D1            2.00000000 sec
D11           0.03000000 sec
TD0           1

```

```
===== CHANNEL f1 =====
NUC1                13C
P1                   8.00 usec
PL1                  0.00 dB
PL1W                 34.9152217 W
SFQ1                 100.6241042 Mhz
```

```

===== CHANNEL f2 =====
CPDPRG2      waitz16
NUC2         1H
PCPD2        90.00 usec
PL2          -3.60 dB
PL12         15.31 dB
PL13         18.00 dB
PL2W         17.83863831 W
PL12W        0.22927761 W
PL13W        0.12341322 W
SFO2         400.1316005 MHz
SI           32768
SF           100.6127690 MHz
WDW          EM
SSB          0
LB           1.00 Hz
GB           0
PC           1.40

```

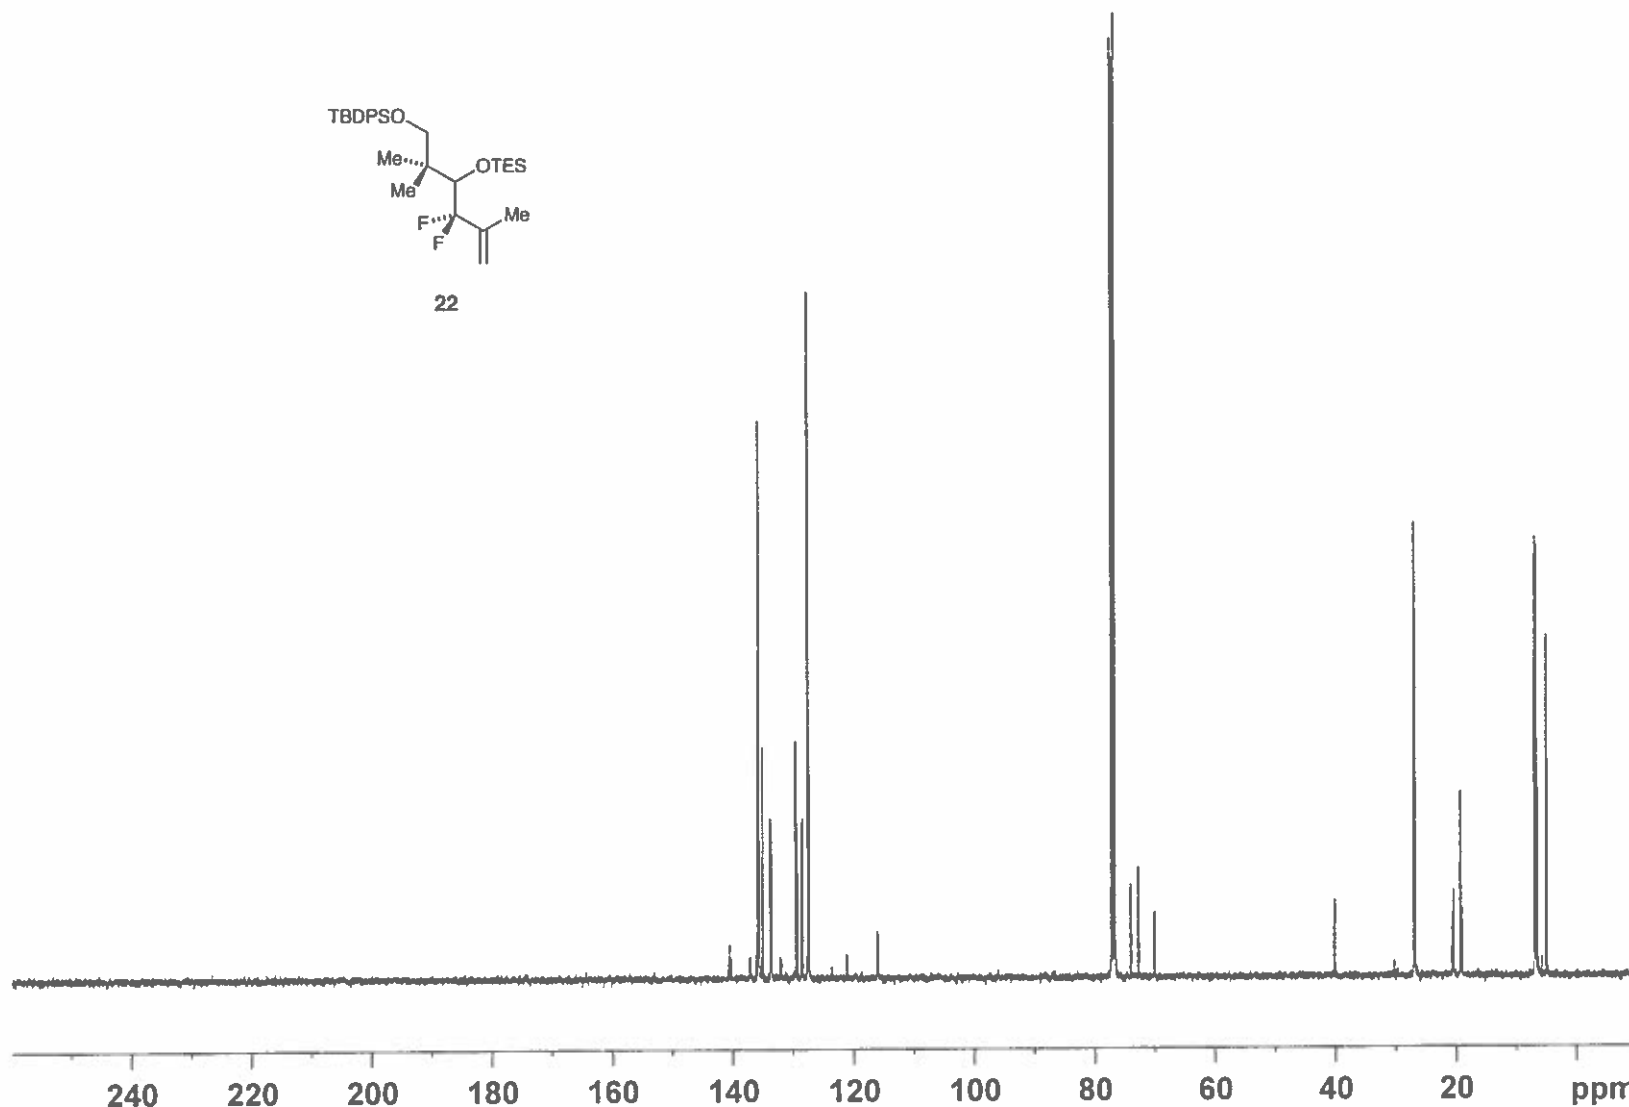

|                        |                                                                                                                |                        |                                                               |                      |                 |                       |          |
|------------------------|----------------------------------------------------------------------------------------------------------------|------------------------|---------------------------------------------------------------|----------------------|-----------------|-----------------------|----------|
| Acquisition Time (sec) | 0.7340                                                                                                         | Comment                | ejt cry wittig mF19CPD CDCI3 (e:\bruk400data\2012\Sep) ejt 47 |                      | Date            | 21 Sep 2012 17:08:32  |          |
| Date Stamp             | 21 Sep 2012 17:08:32                                                                                           |                        |                                                               |                      |                 |                       |          |
| File Name              | \\ss7a.ds.man.ac.uk\vol5\vol3\users\snmr\data\bruk400data\2012\Sep\data\ejt\nmr\2012-09-21-ejt-47\14\data\1\1r |                        |                                                               |                      | Frequency (MHz) | 376.50                |          |
| Nucleus                | 19F                                                                                                            | Number of Transients   | 16                                                            | Origin               | AV400           | Original Points Count | 65536    |
| Owner                  | Administrator                                                                                                  | Points Count           | 262144                                                        | Pulse Sequence       | zgig            | Receiver Gain         | 4100.00  |
| SW(cyclical) (Hz)      | 89285.71                                                                                                       | Solvent                | CHLOROFORM-d                                                  | Spectrum Offset (Hz) | -37649.5977     | Spectrum Type         | STANDARD |
| Sweep Width (Hz)       | 89285.37                                                                                                       | Temperature (degree C) | 21.300                                                        |                      |                 |                       |          |

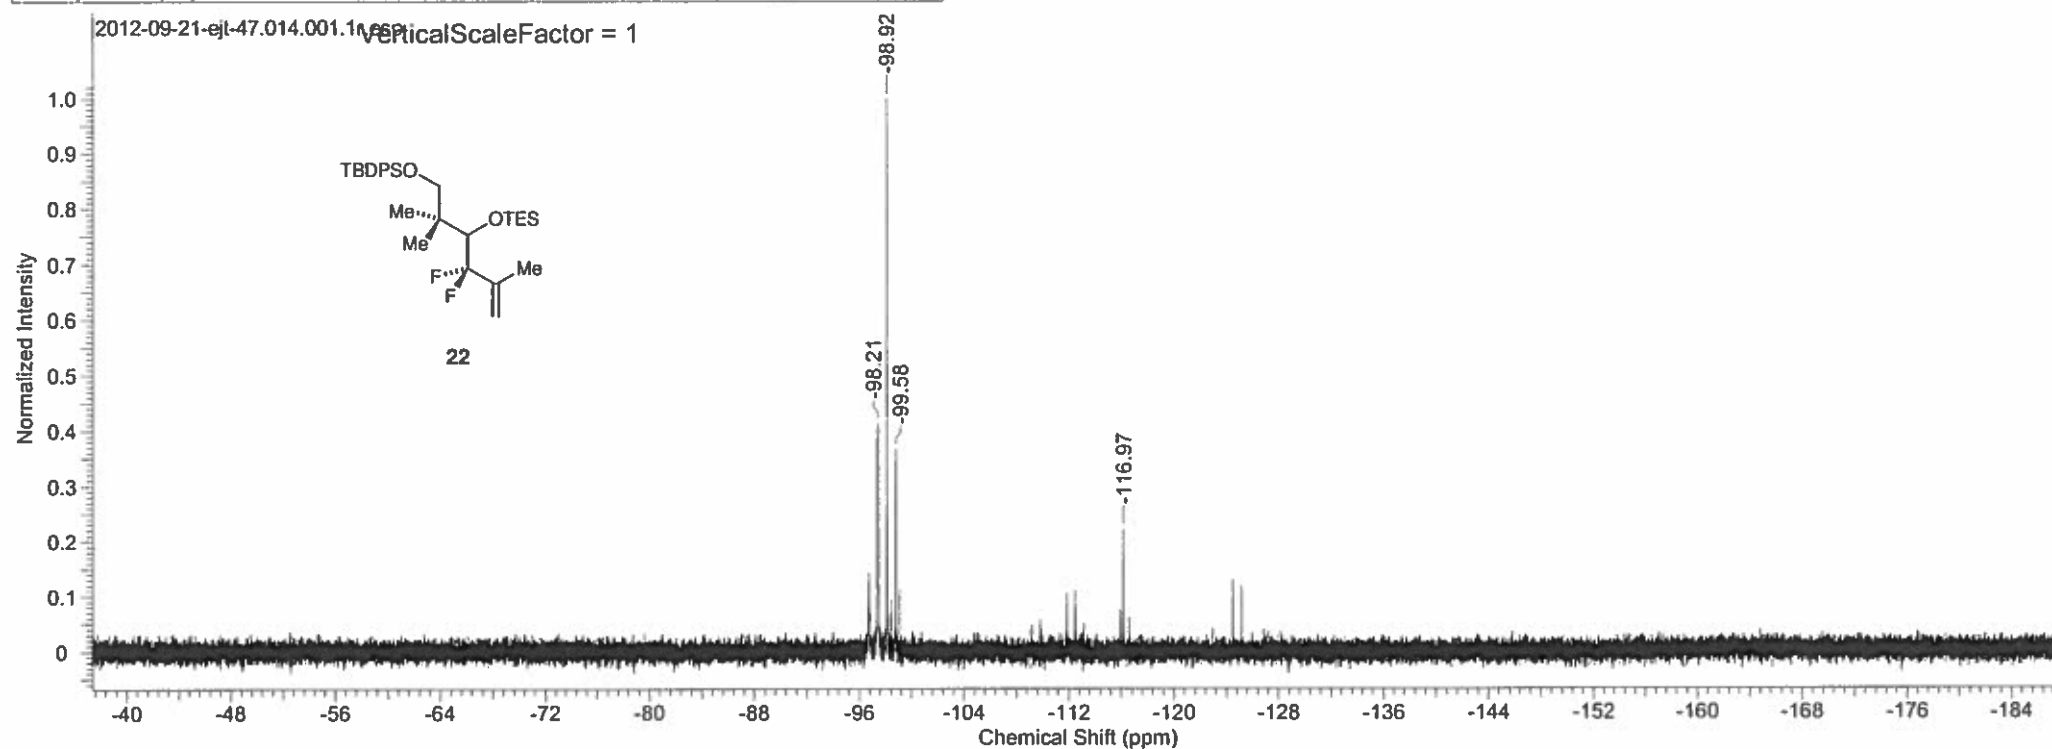

| No. | (ppm)   | (Hz)     | Height |
|-----|---------|----------|--------|
| 1   | -116.97 | -44039.7 | 0.2203 |
| 2   | -99.58  | -37493.1 | 0.3652 |
| 3   | -98.92  | -37241.4 | 1.0000 |
| 4   | -98.21  | -36974.7 | 0.4116 |

|                               |                                                                                                                 |                               |                                                                         |                             |           |                      |
|-------------------------------|-----------------------------------------------------------------------------------------------------------------|-------------------------------|-------------------------------------------------------------------------|-----------------------------|-----------|----------------------|
| <b>Acquisition Time (sec)</b> | 3.9649                                                                                                          | <b>Comment</b>                | ejt cry bromination mPROTONnight CDCI3 (e:\bruk400data\2012\Sep) ejt 34 |                             |           |                      |
| <b>Date</b>                   | 29 Sep 2012 06:41:20                                                                                            | <b>Date Stamp</b>             | 29 Sep 2012 06:41:20                                                    |                             |           |                      |
| <b>File Name</b>              | \\ss7a.ds.man.ac.uk\vol5\vol3\users\snmr\data\bruk400data\2012\Sep\data\ejt\nmr\2012-09-28-ejt-34\22\pdata\111r |                               |                                                                         | <b>Frequency (MHz)</b>      | 400.13    |                      |
| <b>Nucleus</b>                | 1H                                                                                                              | <b>Number of Transients</b>   | 16                                                                      | <b>Origin</b>               | AV400     |                      |
| <b>Owner</b>                  | Administrator                                                                                                   | <b>Points Count</b>           | 32768                                                                   | <b>Pulse Sequence</b>       | zg30b     |                      |
| <b>SW(cyclical) (Hz)</b>      | 8264.46                                                                                                         | <b>Solvent</b>                | CHLOROFORM-d                                                            | <b>Spectrum Offset (Hz)</b> | 2464.9272 | <b>Spectrum Type</b> |
| <b>Sweep Width (Hz)</b>       | 8264.21                                                                                                         | <b>Temperature (degree C)</b> | 21.900                                                                  |                             |           |                      |

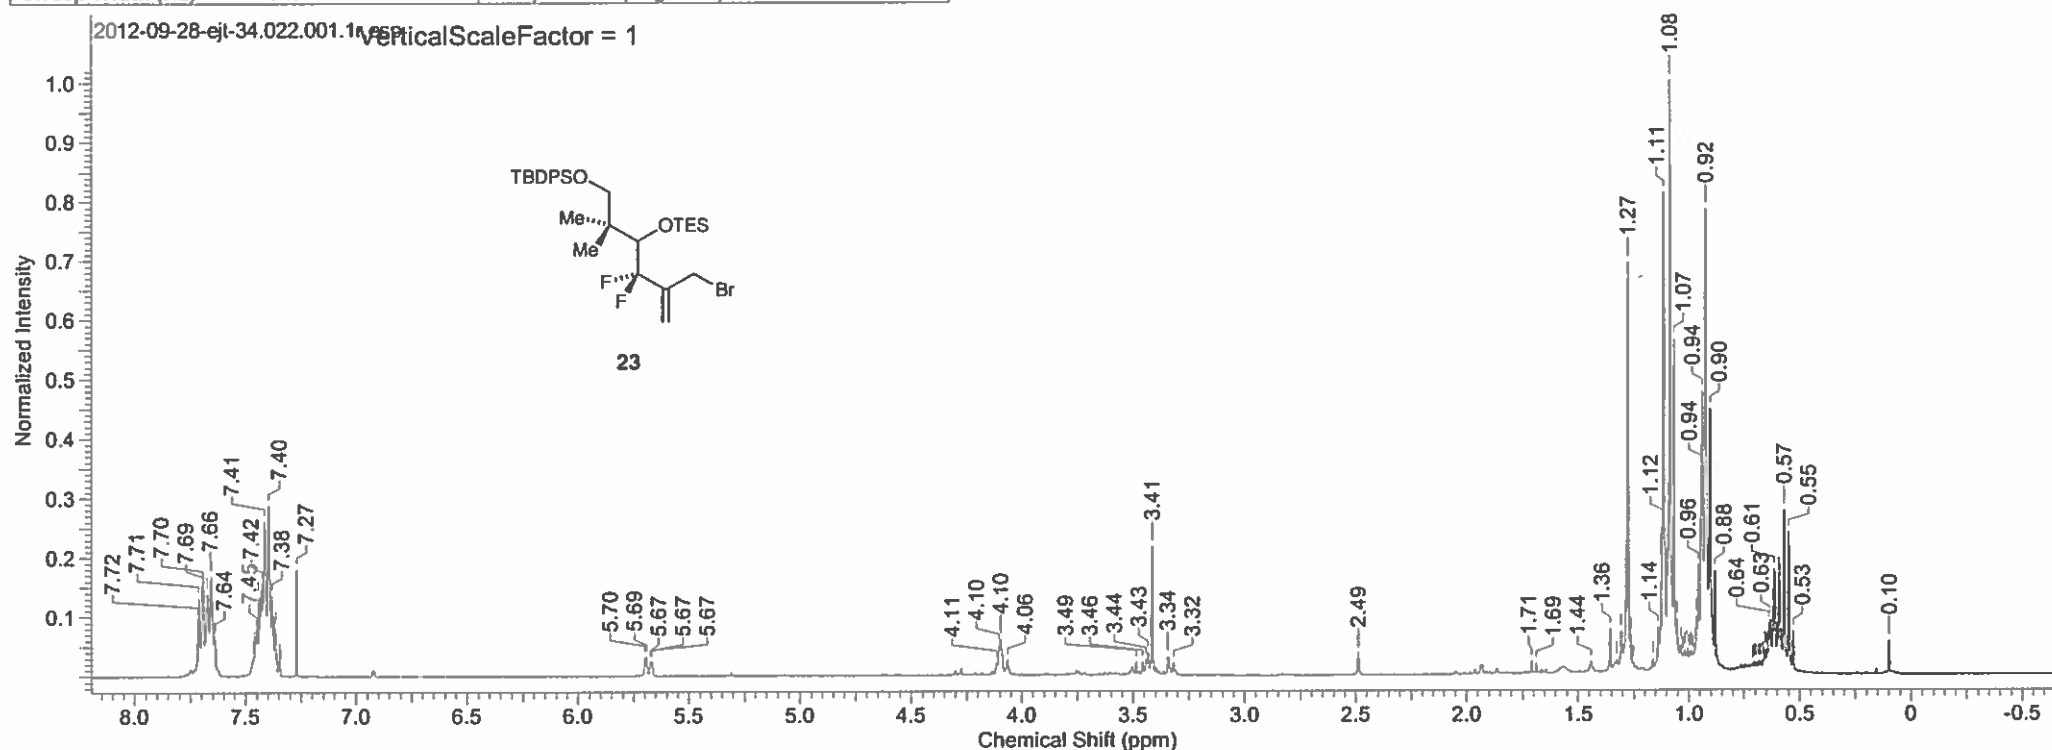

| No. | (ppm) | (Hz)  | Height | No. | (ppm) | (Hz)   | Height |
|-----|-------|-------|--------|-----|-------|-------|--------|-----|-------|-------|--------|-----|-------|-------|--------|-----|-------|--------|--------|
| 1   | 0.10  | 39.3  | 0.0569 | 12  | 0.64  | 255.4 | 0.0854 | 23  | 0.92  | 369.2 | 0.7846 | 34  | 1.02  | 410.0 | 0.0333 | 45  | 1.25  | 500.8  | 0.0197 |
| 2   | 0.53  | 211.5 | 0.0728 | 13  | 0.65  | 258.7 | 0.0423 | 24  | 0.94  | 374.7 | 0.4768 | 35  | 1.04  | 414.6 | 0.0491 | 46  | 1.26  | 505.6  | 0.0664 |
| 3   | 0.55  | 219.6 | 0.2398 | 14  | 0.66  | 262.7 | 0.0431 | 25  | 0.94  | 377.2 | 0.3485 | 36  | 1.05  | 421.1 | 0.0929 | 47  | 1.27  | 510.2  | 0.6938 |
| 4   | 0.57  | 227.4 | 0.2773 | 15  | 0.67  | 266.3 | 0.0256 | 26  | 0.96  | 382.8 | 0.1848 | 37  | 1.07  | 426.4 | 0.5648 | 48  | 1.31  | 522.3  | 0.0724 |
| 5   | 0.58  | 232.0 | 0.0477 | 16  | 0.67  | 270.1 | 0.0215 | 27  | 0.96  | 386.1 | 0.0974 | 38  | 1.07  | 430.0 | 0.1603 | 49  | 1.33  | 530.8  | 0.0254 |
| 6   | 0.59  | 235.8 | 0.1562 | 17  | 0.68  | 273.3 | 0.0229 | 28  | 0.98  | 391.6 | 0.0344 | 39  | 1.08  | 433.5 | 1.0000 | 50  | 1.36  | 542.4  | 0.0765 |
| 7   | 0.59  | 236.8 | 0.1676 | 18  | 0.69  | 277.4 | 0.0206 | 29  | 0.99  | 394.1 | 0.0378 | 40  | 1.09  | 436.8 | 0.2914 | 51  | 1.44  | 577.0  | 0.0218 |
| 8   | 0.60  | 240.0 | 0.0879 | 19  | 0.70  | 281.4 | 0.0220 | 30  | 0.99  | 396.4 | 0.0415 | 41  | 1.11  | 444.8 | 0.8124 | 52  | 1.69  | 675.4  | 0.0202 |
| 9   | 0.61  | 244.8 | 0.1781 | 20  | 0.71  | 284.9 | 0.0185 | 31  | 1.00  | 398.7 | 0.0372 | 42  | 1.12  | 447.9 | 0.2577 | 53  | 1.71  | 683.2  | 0.0231 |
| 10  | 0.62  | 247.9 | 0.1145 | 21  | 0.88  | 352.3 | 0.1744 | 32  | 1.01  | 402.2 | 0.0435 | 43  | 1.14  | 455.2 | 0.0789 | 54  | 2.49  | 995.7  | 0.0366 |
| 11  | 0.63  | 252.7 | 0.0927 | 22  | 0.90  | 360.9 | 0.4475 | 33  | 1.02  | 407.3 | 0.0412 | 44  | 1.16  | 465.0 | 0.0262 | 55  | 3.32  | 1328.1 | 0.0218 |

ejt cry bromination  
mF19 CDCl3 {e:\bruk400data\2012\Sep} ejt 34

-91.2  
-91.8  
-98.9  
-99.6

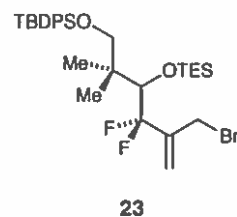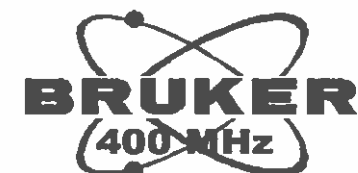

NAME 2012-09-28-ejt-34  
EXPNO 20  
PROCNO 1  
Date\_ 20120928  
Time 13.29  
INSTRUM AV400  
PROBHD 5 mm PABBO BB-  
PULPROG zg  
TD 131072  
SOLVENT CDCl3  
NS 16  
DS 4  
SWH 89285.711 Hz  
FIDRES 0.681196 Hz  
AQ 0.7340532 sec  
RG 4100  
DW 5.600 usec  
DE 11.01 usec  
TE 295.2 K  
D1 1.00000000 sec  
TD0 1

===== CHANNEL f1 =====  
NUC1 19F  
P1 10.70 usec  
PL1 -5.00 dB  
PL1W 27.00716019 W  
SF01 376.4607164 MHz  
SI 262144  
SF 376.4983660 MHz  
WDW EM  
SSB 0  
LB 0.30 Hz  
GB 0  
PC 2.00

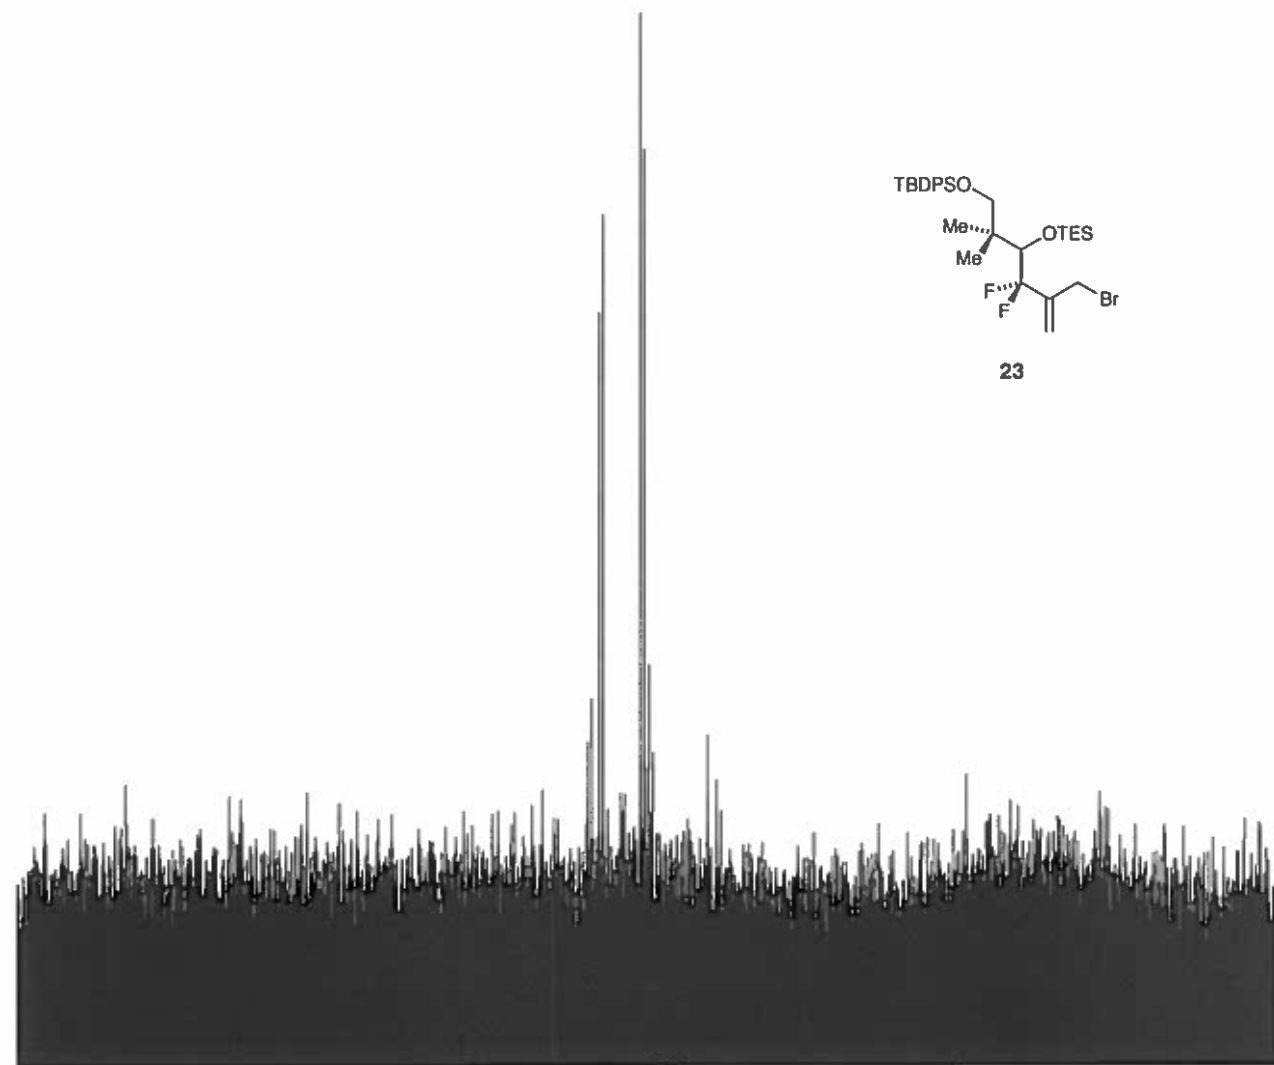

0 -50 -100 -150 -200 ppm

2 1 5 2 6 6 5 8

|                        |                                                                                                                |                        |                                                                     |                      |                 |                       |          |
|------------------------|----------------------------------------------------------------------------------------------------------------|------------------------|---------------------------------------------------------------------|----------------------|-----------------|-----------------------|----------|
| Acquisition Time (sec) | 3.9649                                                                                                         | Comment                | ejt cry vinyl iodide mPROTON CDCl3 (e:\bruk400data\2012\Oct) ejt 13 |                      | Date            | 09 Oct 2012 12:46:08  |          |
| Date Stamp             | 09 Oct 2012 12:46:08                                                                                           |                        |                                                                     |                      |                 |                       |          |
| File Name              | \\ss7a.ds.man.ac.uk\vol5\vol3\users\snmrdata\bruk400data\2012\Oct\data\ejt\1nmr\2012-10-09-ejt-13\10\data\1\1r |                        |                                                                     |                      | Frequency (MHz) | 400.13                |          |
| Nucleus                | 1H                                                                                                             | Number of Transients   | 16                                                                  | Origin               | AV400           | Original Points Count | 32768    |
| Owner                  | Administrator                                                                                                  | Points Count           | 32768                                                               | Pulse Sequence       | zg30b           | Receiver Gain         | 322.00   |
| SW(cyclical) (Hz)      | 8264.46                                                                                                        | Solvent                | CHLOROFORM-d                                                        | Spectrum Offset (Hz) | 2464.9272       | Spectrum Type         | STANDARD |
| Sweep Width (Hz)       | 8264.21                                                                                                        | Temperature (degree C) | 21.300                                                              |                      |                 |                       |          |

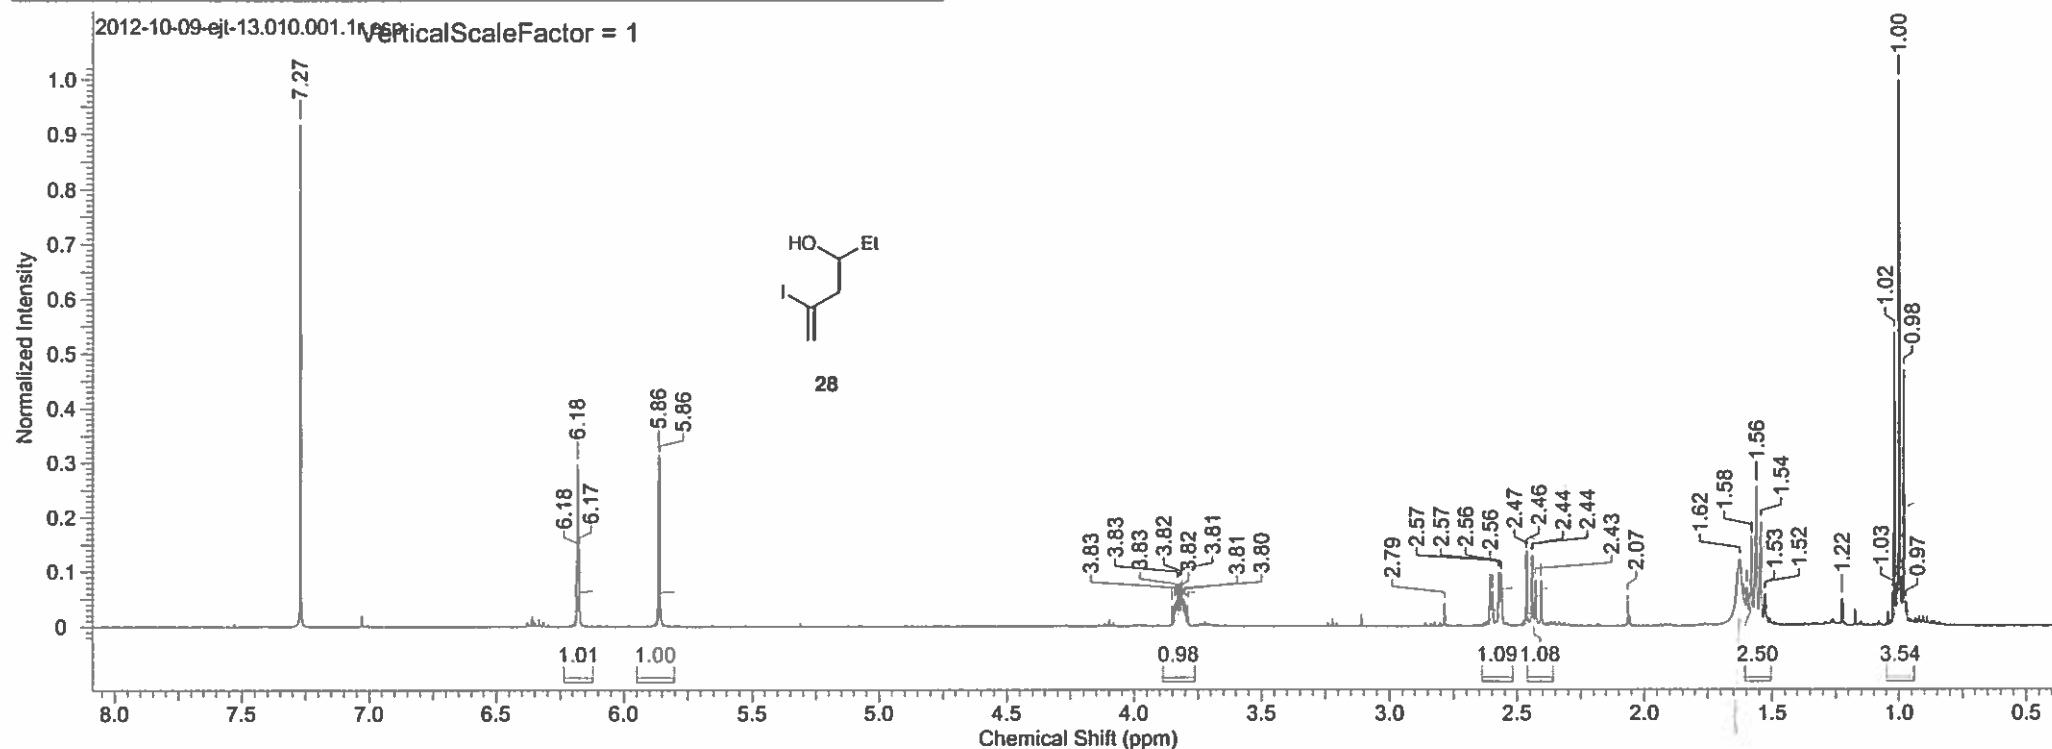

| No. | (ppm)        | Value      | Absolute Value | Non-Negative Value |
|-----|--------------|------------|----------------|--------------------|
| 1   | 9398 .. 1.04 | 3.54017091 | 1.01245312e+8  | 3.54017091         |
| 2   | 5041 .. 1.60 | 2.49626207 | 7.13905760e+7  | 2.49626207         |
| 3   | 3854 .. 2.48 | 1.07680511 | 3.07955380e+7  | 1.07680511         |
| 4   | 5185 .. 2.63 | 1.09013748 | 3.11768320e+7  | 1.09013748         |
| 5   | 7612 .. 3.88 | 0.97696531 | 2.79402220e+7  | 0.97696531         |
| 6   | 3027 .. 5.94 | 1.00033140 | 2.86084700e+7  | 1.00033140         |
| 7   | 1198 .. 6.23 | 1.00761056 | 2.88166460e+7  | 1.00761056         |

|                        |                      |                   |                                                                                                               |                        |              |                      |            |
|------------------------|----------------------|-------------------|---------------------------------------------------------------------------------------------------------------|------------------------|--------------|----------------------|------------|
| Acquisition Time (sec) | 1.0835               | Comment           | ejt cry iodide 10 mCARBONnight CDCl3 (e:\bruk400data\2012\Oct) ejt 10                                         |                        | Date         | 08 Oct 2012 19:35:44 |            |
| Date Stamp             | 08 Oct 2012 19:35:44 | File Name         | \\ss7a.ds.man.ac.uk\vol5\vol3\users\snmrdata\bruk400data\2012\Oct\data\ejt\nmr\2012-10-08-ejt-10\12\data\1\1r |                        |              |                      |            |
| Frequency (MHz)        | 100.61               | Nucleus           | 13C                                                                                                           | Number of Transients   | 800          | Origin               | AV400      |
| Original Points Count  | 32768                | Owner             | Administrator                                                                                                 | Points Count           | 32768        | Pulse Sequence       | zgpg30     |
| Receiver Gain          | 512.00               | SW(cyclical) (Hz) | 30241.94                                                                                                      | Solvent                | CHLOROFORM-d | Spectrum Offset (Hz) | 11332.2295 |
| Spectrum Type          | STANDARD             | Sweep Width (Hz)  | 30241.01                                                                                                      | Temperature (degree C) | 22.900       |                      |            |

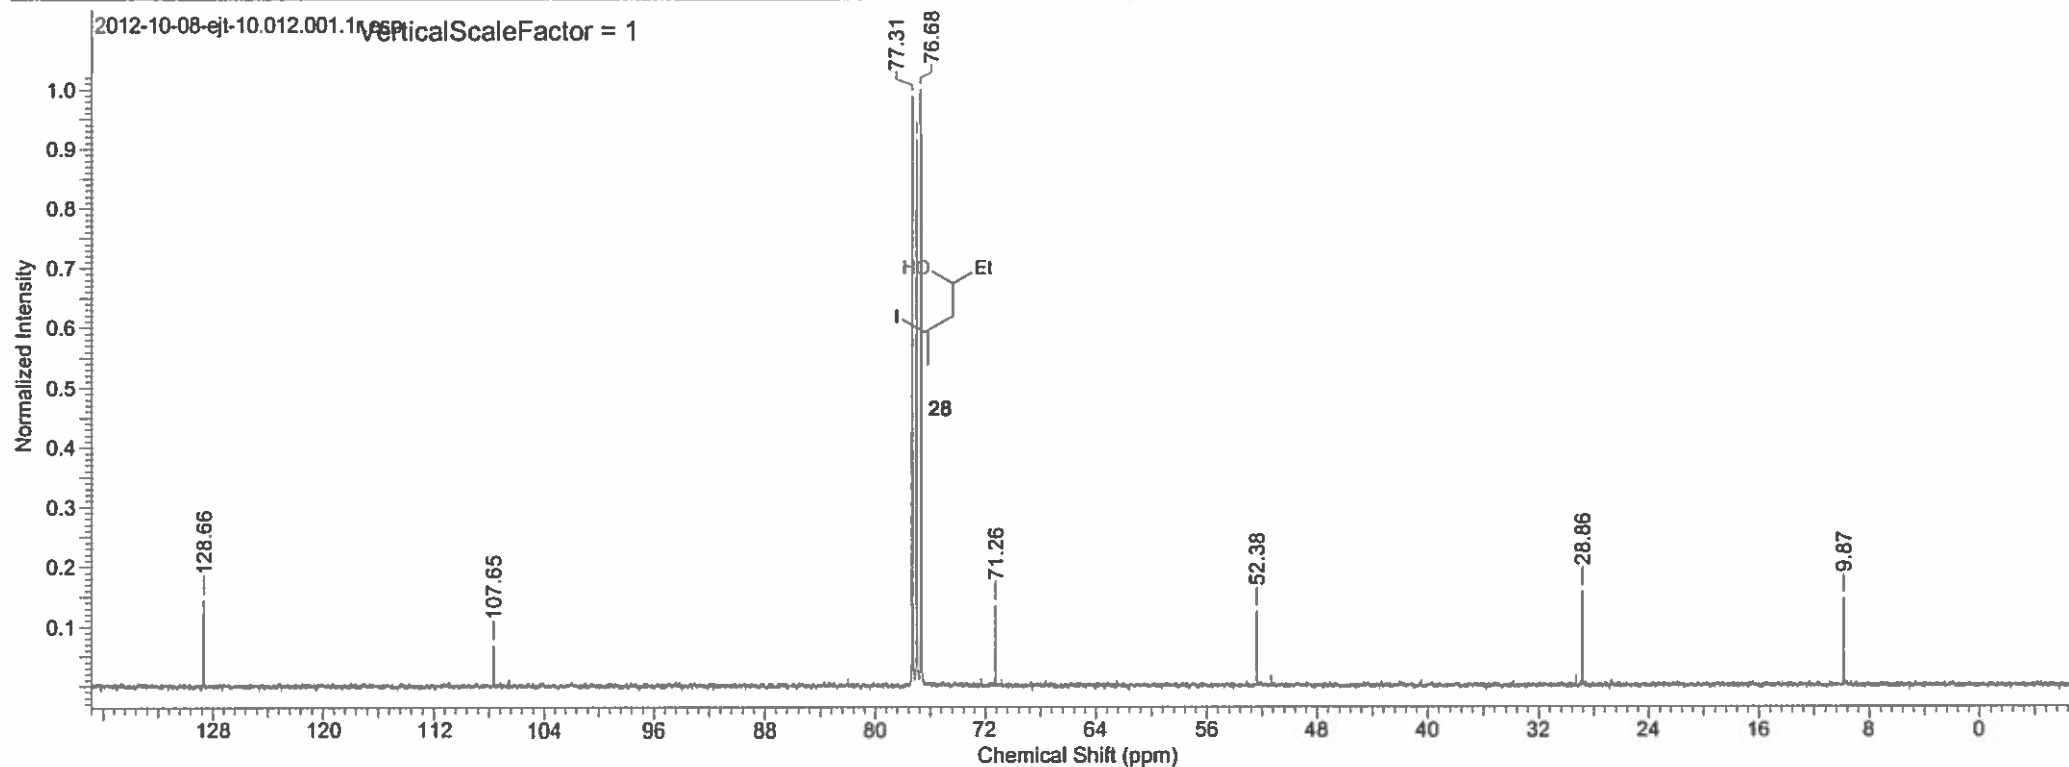

| No. | (ppm)  | (Hz)    | Height |
|-----|--------|---------|--------|
| 1   | 9.87   | 993.3   | 0.1460 |
| 2   | 28.86  | 2903.7  | 0.1572 |
| 3   | 52.38  | 5270.1  | 0.1243 |
| 4   | 71.26  | 7169.4  | 0.1335 |
| 5   | 76.68  | 7714.9  | 1.0000 |
| 6   | 77.00  | 7747.2  | 0.9152 |
| 7   | 77.31  | 7778.6  | 0.9874 |
| 8   | 107.65 | 10830.6 | 0.0683 |
| 9   | 128.66 | 12945.0 | 0.1445 |

|                        |                                                                                                              |                        |                                                              |                      |                 |                       |          |
|------------------------|--------------------------------------------------------------------------------------------------------------|------------------------|--------------------------------------------------------------|----------------------|-----------------|-----------------------|----------|
| Acquisition Time (sec) | 5.3084                                                                                                       | Comment                | ejt cry vinyl mPROTON CDCl3 (E:\bruk300data\2012\Nov) ejt 60 |                      | Date            | 21 Nov 2012 10:22:56  |          |
| Date Stamp             | 21 Nov 2012 10:22:56                                                                                         |                        |                                                              |                      |                 |                       |          |
| File Name              | \\ss7a.ds.man.ac.uk\vol5\vol3\users\snmrdata\bruk300data\2012\Nov\data\ejt\nmr\2012-11-21-ejt-60\10\data\11r |                        |                                                              |                      | Frequency (MHz) | 299.95                |          |
| Nucleus                | 1H                                                                                                           | Number of Transients   | 16                                                           | Origin               | DPX300          | Original Points Count | 32768    |
| Owner                  | Administrator                                                                                                | Points Count           | 32768                                                        | Pulse Sequence       | zg30            | Receiver Gain         | 456.10   |
| SW(cyclical) (Hz)      | 6172.84                                                                                                      | Solvent                | CHLOROFORM-d                                                 | Spectrum Offset (Hz) | 1848.6169       | Spectrum Type         | STANDARD |
| Sweep Width (Hz)       | 6172.65                                                                                                      | Temperature (degree C) | 27.000                                                       |                      |                 |                       |          |

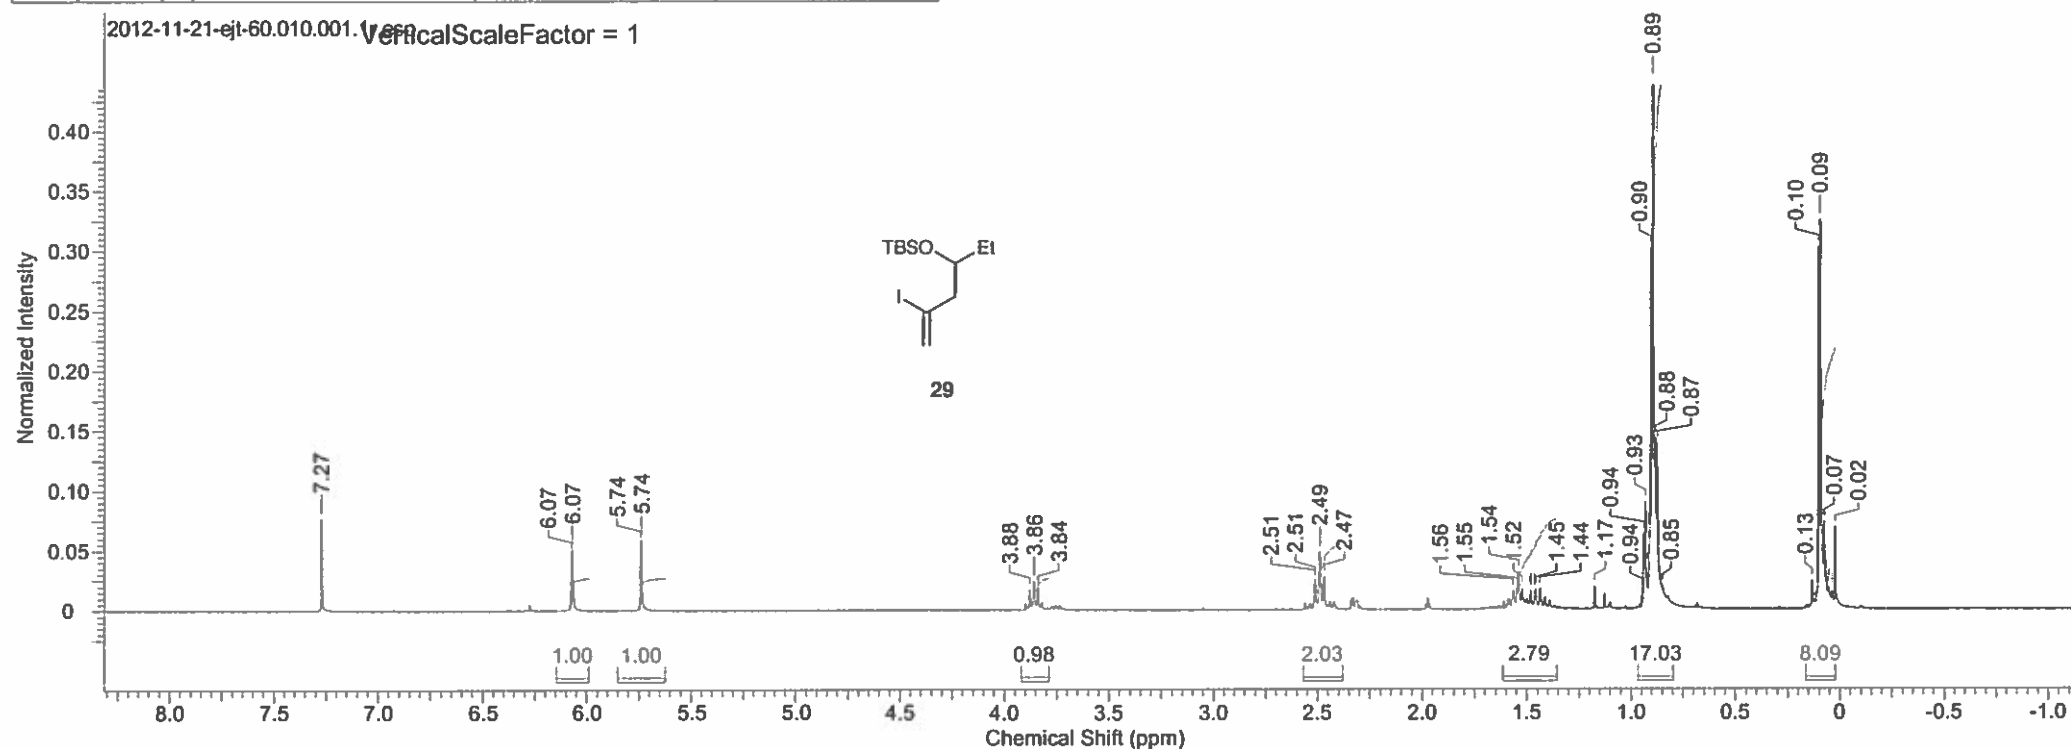

| No. | (ppm)         | Value      | Absolute Value | Non-Negative Value |
|-----|---------------|------------|----------------|--------------------|
| 1   | 0.223 .. 0.16 | 8.08682060 | 4.68993120e+8  | 8.08682060         |
| 2   | 7.955 .. 0.96 | 7.02706337 | 9.87480256e+8  | 17.02706337        |
| 3   | 3.579 .. 1.61 | 2.78549266 | 1.61543936e+8  | 2.78549266         |
| 4   | 3.810 .. 2.56 | 2.03447366 | 1.17988776e+8  | 2.03447366         |
| 5   | 7.869 .. 3.91 | 0.98051947 | 5.68649760e+7  | 0.98051947         |
| 6   | 5.223 .. 5.84 | 0.99646074 | 5.77894880e+7  | 0.99646074         |
| 7   | 9.894 .. 6.14 | 0.99959248 | 5.79711120e+7  | 0.99959248         |



EJT-PRM46 TBS vinyl iodide data  
mCARBONnight CDCl<sub>3</sub> {e:\bruk400data\2012\Nov} ejt 58

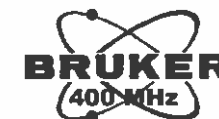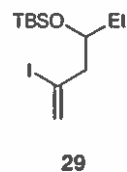

138.94  
127.76  
108.70  
79.01  
77.35  
77.03  
76.71  
71.75  
52.41  
33.67  
30.18  
29.12  
28.33  
26.30  
25.92  
25.81  
18.12  
9.73  
9.62  
9.23  
-4.19  
-4.37  
-4.63

NAME 2012-11-28-ejt-58  
EXPNO 10  
PROCNO 1  
Date 20121129  
Time 20.00  
INSTRUM AV400  
PROBHD 5 mm PABBO BB-  
PULPROG zgpg30  
TD 65536  
SOLVENT CDCl<sub>3</sub>  
NS 256  
DS 2  
SWH 30241.936 Hz  
FIDRES 0.461455 Hz  
AQ 1.0835786 sec  
RG 512  
DW 16.533 usec  
DE 7.83 usec  
TE 293.9 K  
D1 2.00000000 sec  
D11 0.03000000 sec  
TD0 1

===== CHANNEL f1 =====  
NUC1 13C  
P1 8.00 usec  
PL1 0.00 dB  
PL1W 34.91522217 W  
SFO1 100.6241042 MHz

===== CHANNEL f2 =====  
CPDPRG2 waltz16  
NUC2 1H  
PCPD2 90.00 usec  
PL2 -3.60 dB  
PL12 15.31 dB  
PL13 18.00 dB  
PL2W 17.83863831 W  
PL12W 0.22927761 W  
PL13W 0.12341322 W  
SFO2 400.1316005 MHz  
SI 32768  
SF 100.6127690 MHz  
WDW EM  
SSB 0  
LB 1.00 Hz  
GB 0  
PC 1.40

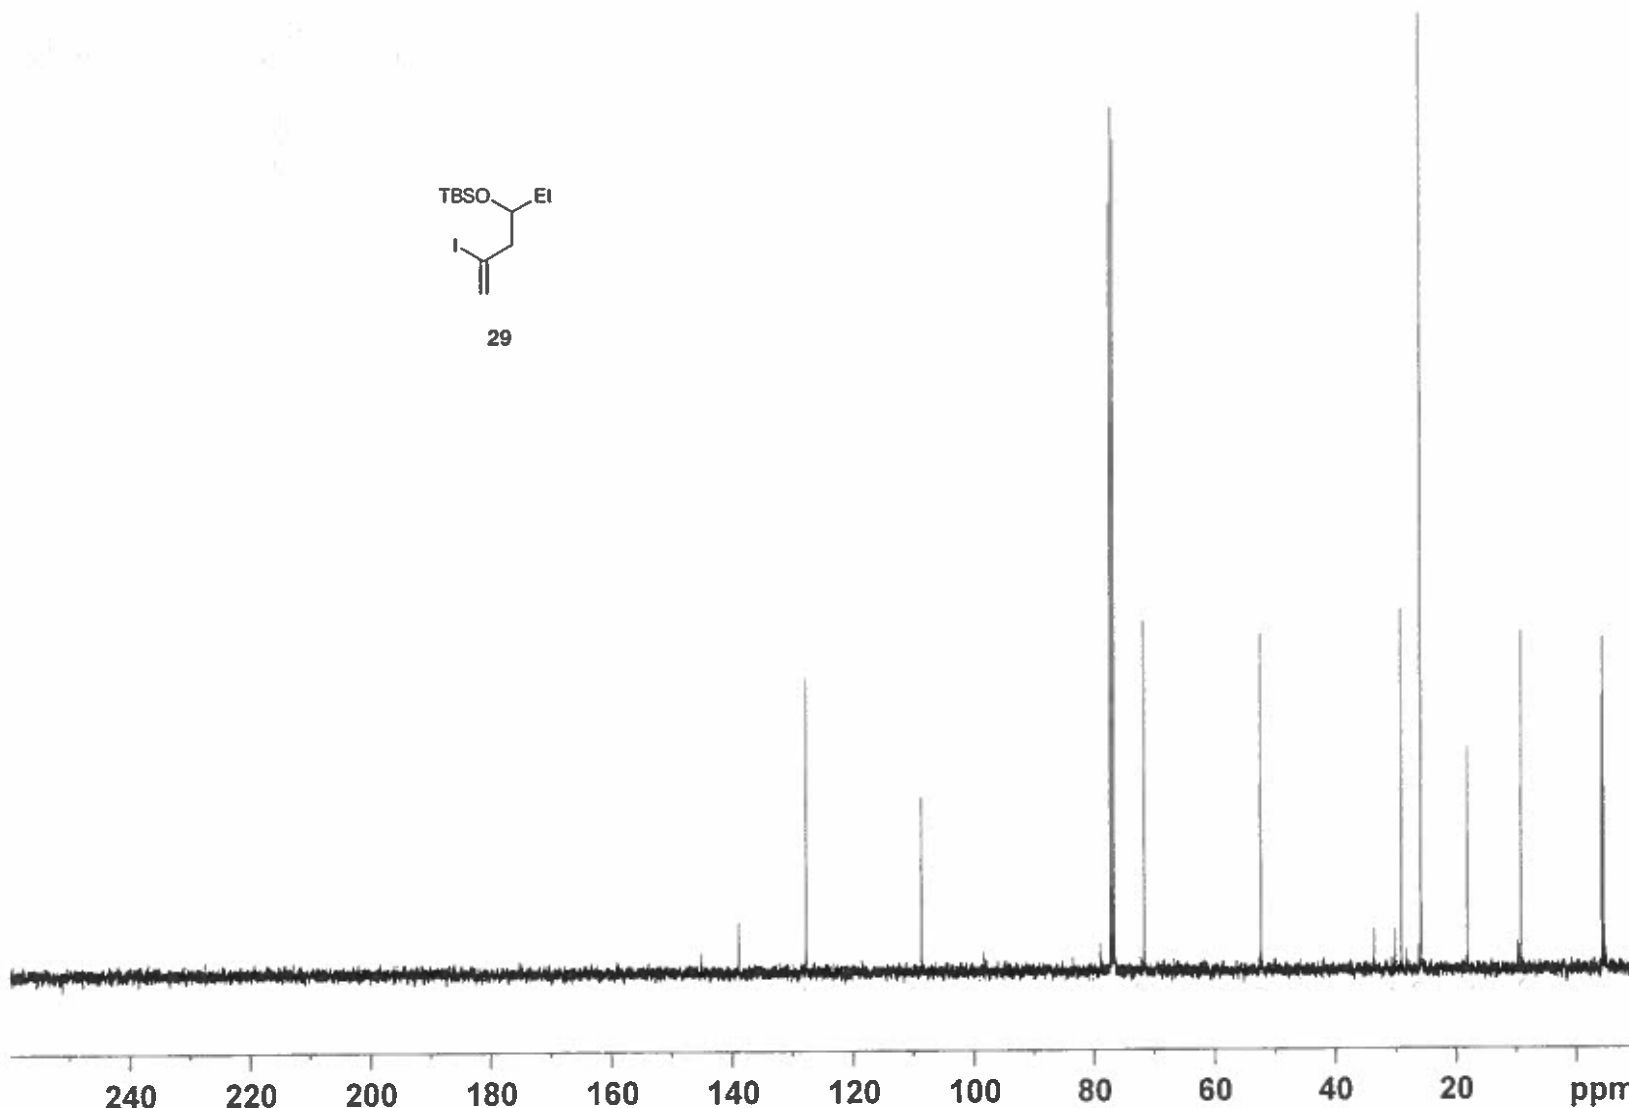

EJT-PRM48c f4-5 8mg full data  
mPROTONnight CDCl<sub>3</sub> /opt/bruk500data/2013/Jan ejt 31

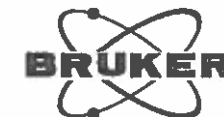

NAME 2013-01-10-ejt-31  
EXPNO 11  
PROCNO 1  
Date\_ 20130110  
Time 21.35  
INSTRUM spect  
PROBHD 5 mm PABBO BB-  
PULPROG zg30b  
TD 65536  
SOLVENT CDCl<sub>3</sub>  
NS 16  
DS 0  
SWH 10330.578 Hz  
FIDRES 0.157632 Hz  
AQ 3.1719923 sec  
RG 90.5  
DW 48.400 usec  
DE 13.00 usec  
TE 300.0 K  
D1 1.00000000 sec  
TD0 1

===== CHANNEL f1 =====  
NUC1 1H  
P1 10.00 usec  
PL1 -0.10 dB  
PL1W 26.21803665 W  
SFO1 500.1330885 MHz  
SI 32768  
SF 500.1300359 MHz  
WDW EM  
SSB 0  
LB 0.30 Hz  
GB 0  
PC 1.00

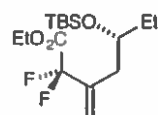

30

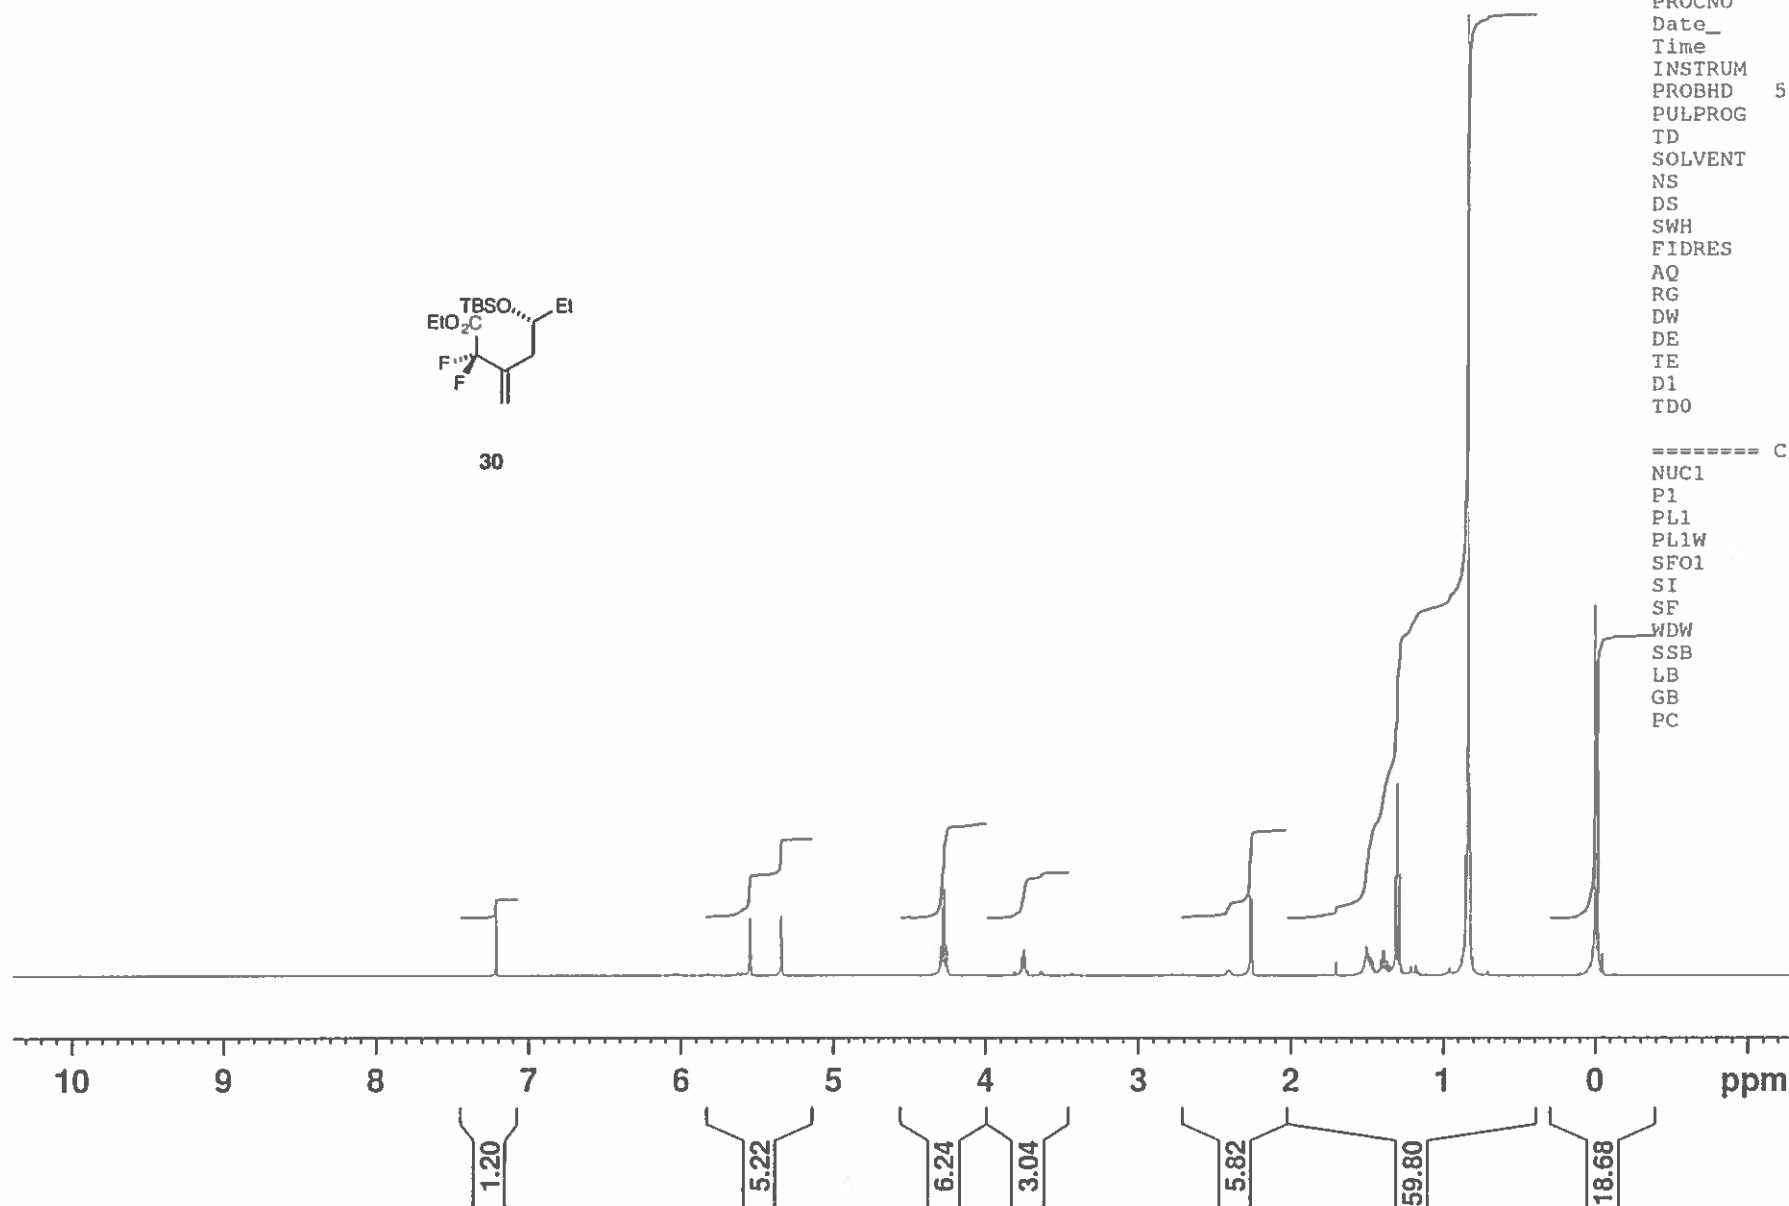

EJT-PRM48c f4-5 8mg full data  
mCARBONnight CDCl3 /opt/bruk500data/2013/Jan ejt 31

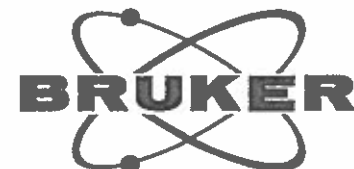

NAME 2013-01-10-ejt-31  
EXPNO 10  
PROCNO 1  
Date\_ 20130110  
Time 21.33  
INSTRUM spect  
PROBHD 5 mm PABBO BB-  
PULPROG zgpg30  
TD 65536  
SOLVENT CDCl3  
NS 2000  
DS 2  
SWH 29761.904 Hz  
FIDRES 0.454131 Hz  
AQ 1.1010548 sec  
RG 512  
DW 16.800 usec  
DE 32.78 usec  
TE 293.8 K  
D1 2.00000000 sec  
D11 0.03000000 sec  
TD0 1

===== CHANNEL f1 =====  
NUC1 13C  
P1 8.80 usec  
PL1 -1.00 dB  
PL1W 104.35516357 W  
SFO1 125.7703643 MHz

===== CHANNEL f2 =====  
CPDPRG2 waltz16  
NUC2 1H  
PCPD2 80.00 usec  
PL2 0.00 dB  
PL12 17.23 dB  
PL13 120.00 dB  
PL2W 25.62124252 W  
PL12W 0.48484197 W  
PL13W 0.00000000 W  
SFO2 500.1320005 MHz  
SI 32768  
SF 125.7577890 MHz  
WDW EM  
SSB 0  
LB 1.00 Hz  
GB 0  
PC 1.40

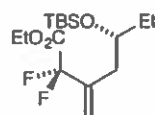

30

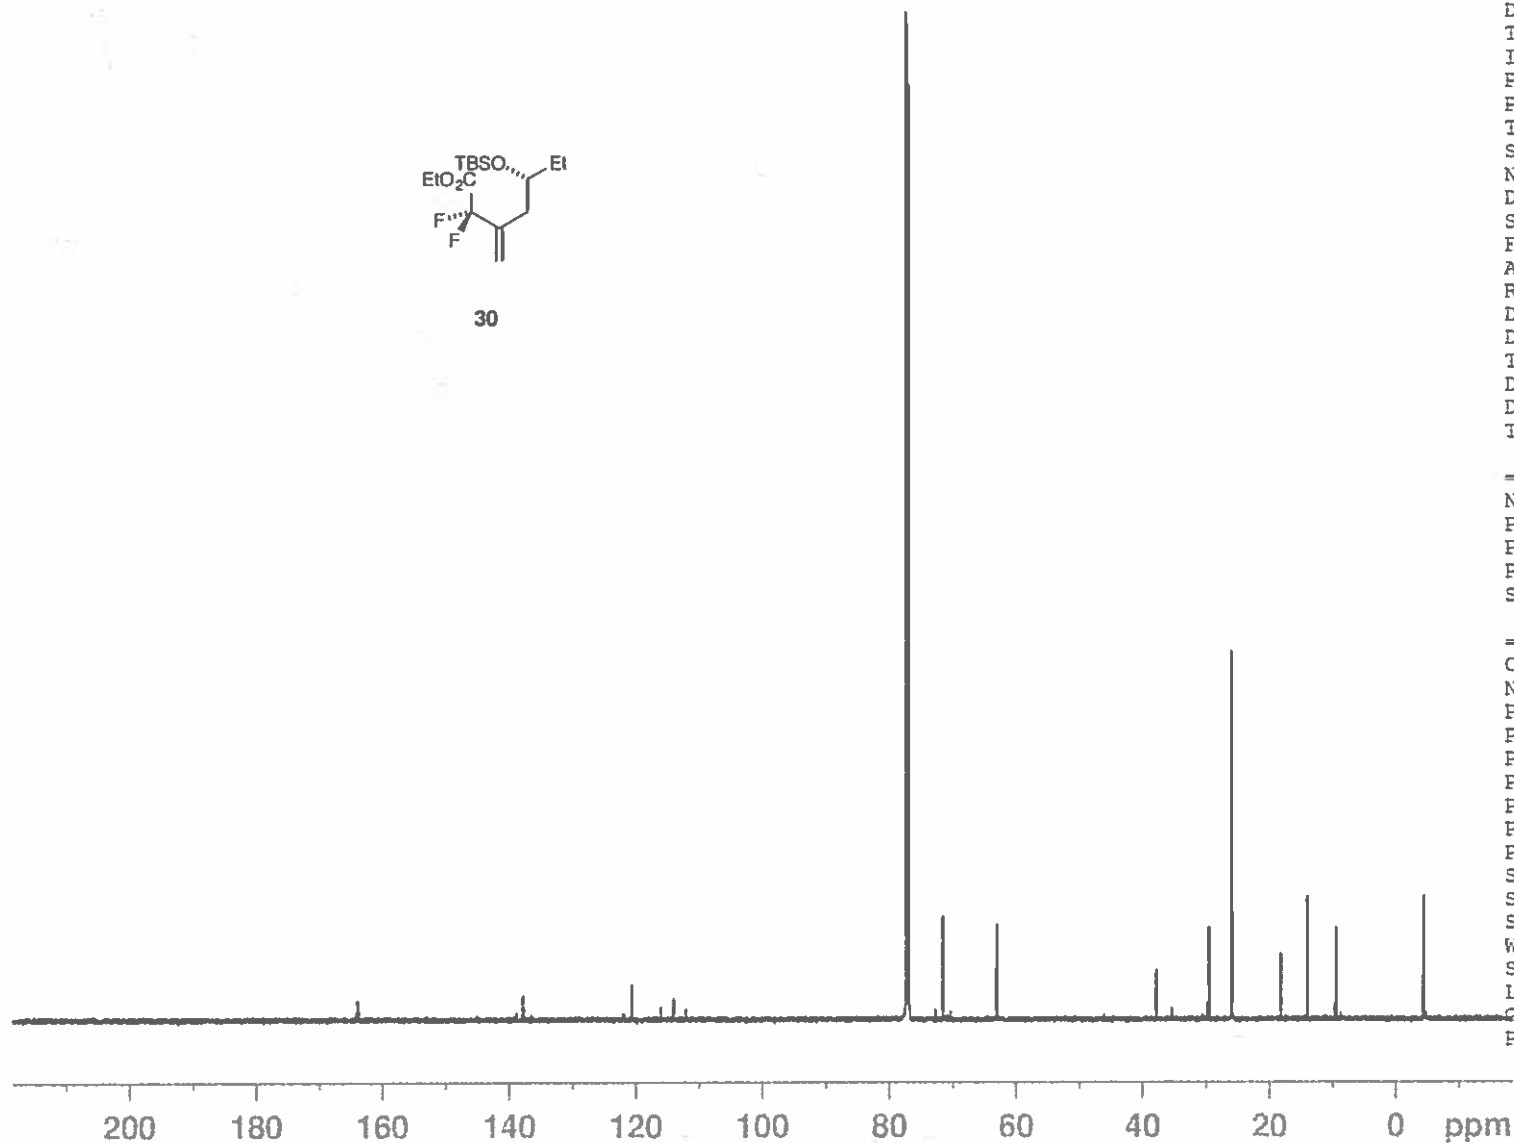

EJT-PRM48c f4-5 8mg  
m19F CDC13 /opt/bruk500data/2013/Jan ejt 29

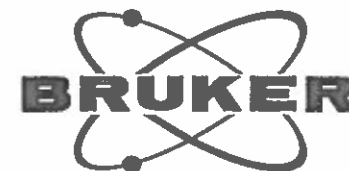

NAME 2013-01-10-ejt-29  
EXPNO 12  
PROCNO 1  
Date\_ 20130110  
Time 17.38  
INSTRUM spect  
PROBHD 5 mm PABBO BB-  
PULPROG zgflqn  
TD 131072  
SOLVENT CDC13  
NS 16  
DS 4  
SWH 113636.367 Hz  
FIDRES 0.866977 Hz  
AQ 0.5767668 sec  
RG 203  
DW 4.400 usec  
DE 6.50 usec  
TE 300.0 K  
D1 1.00000000 sec  
TD0 1

===== CHANNEL f1 =====  
NUC1 19F  
P1 17.50 usec  
PL1 -2.90 dB  
PL1W 48.97788239 W  
SFO1 470.5453180 MHz  
SI 65536  
SF 470.5923770 MHz  
WDW EM  
SSB 0  
LB 0.30 Hz  
GB 0  
PC 1.00

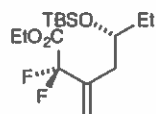

30

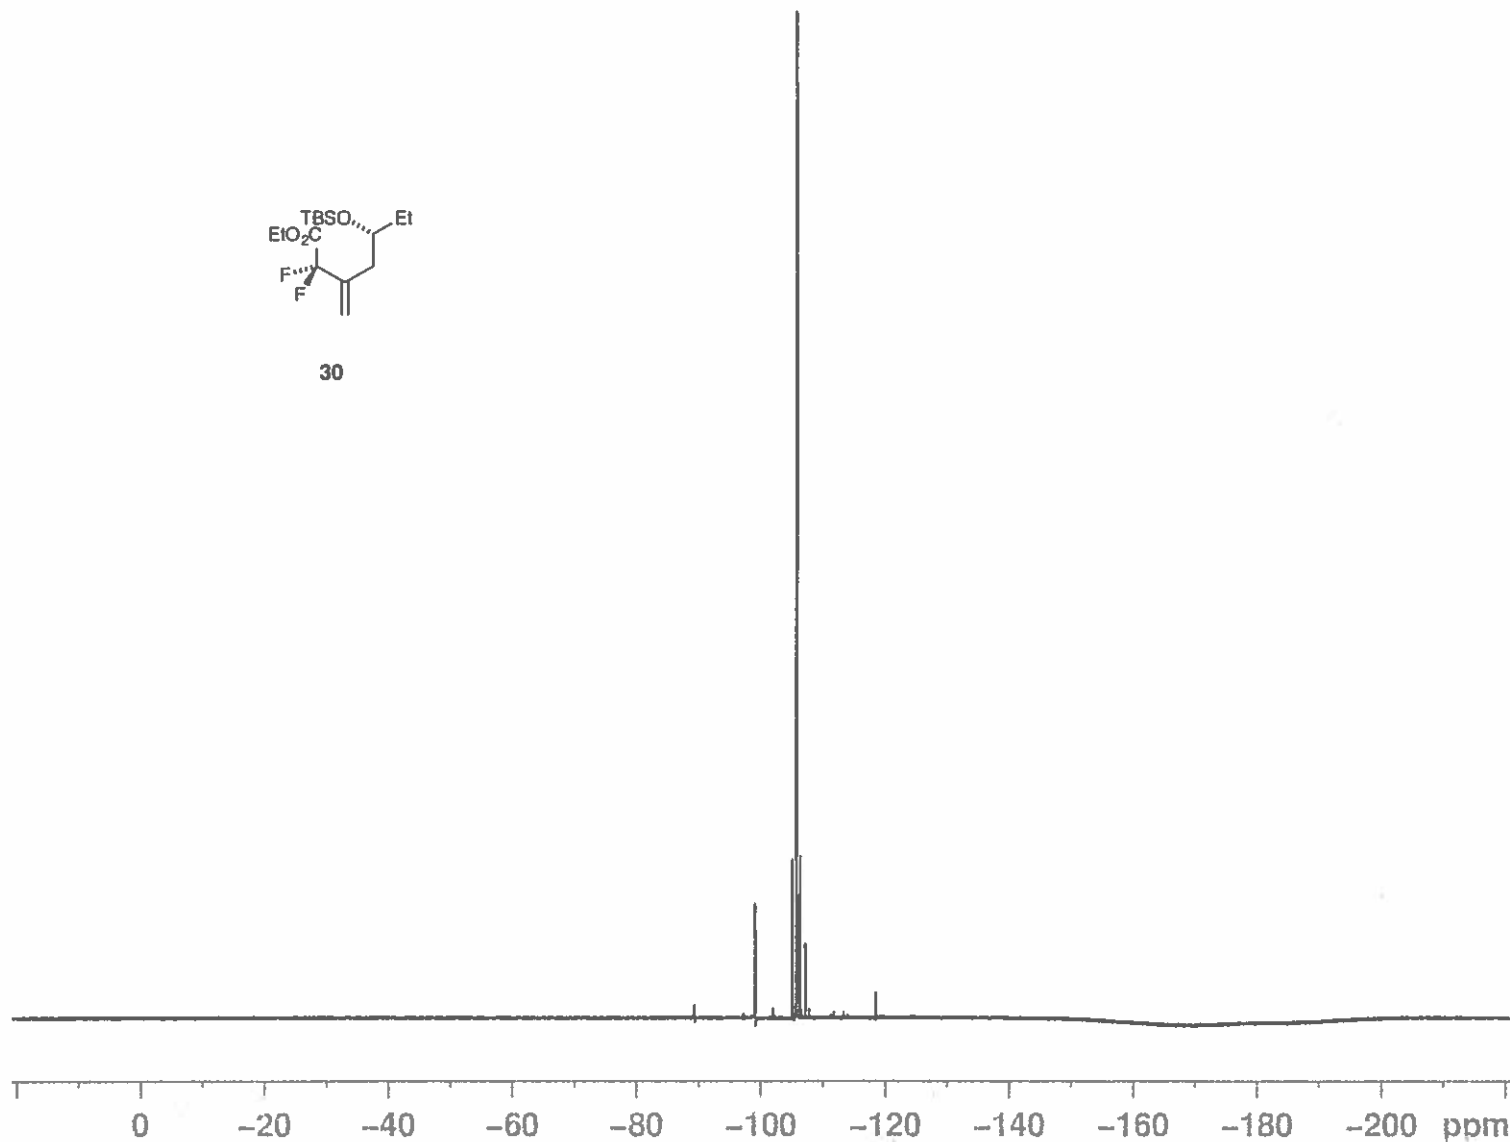

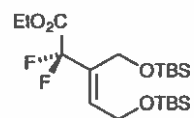

|         |                   |
|---------|-------------------|
| NAME    | 2013-05-02-ejt-40 |
| EXPNO   | 11                |
| PROCNO  | 1                 |
| Date_   | 20130503          |
| Time    | 2.19              |
| INSTRUM | AV400             |
| PROBHD  | 5 mm PABBO BB-    |
| PULPROG | zg30b             |
| TD      | 65536             |
| SOLVENT | CDC13             |
| NS      | 16                |
| DS      | 0                 |
| SWH     | 8264.463 Hz       |
| FIDRES  | 0.126106 Hz       |
| AQ      | 3.9649780 sec     |
| RG      | 203               |
| DW      | 60.500 usec       |
| DE      | 9.40 usec         |
| TE      | 300.0 K           |
| D1      | 1.00000000 sec    |
| TD0     | 1                 |

```

===== CHANNEL f1 =====
FUC1                1H
PL1                 10.00 usec
PL1                 -3.60 dB
PL1W               17.83863831 W
F01                 400.1324710 MHz
SI                  32768
SF                  400.1300401 MHz
WDW                  EM
SSB                  0
LB                   0.30 Hz
GB                  0
PC                   1.00

```

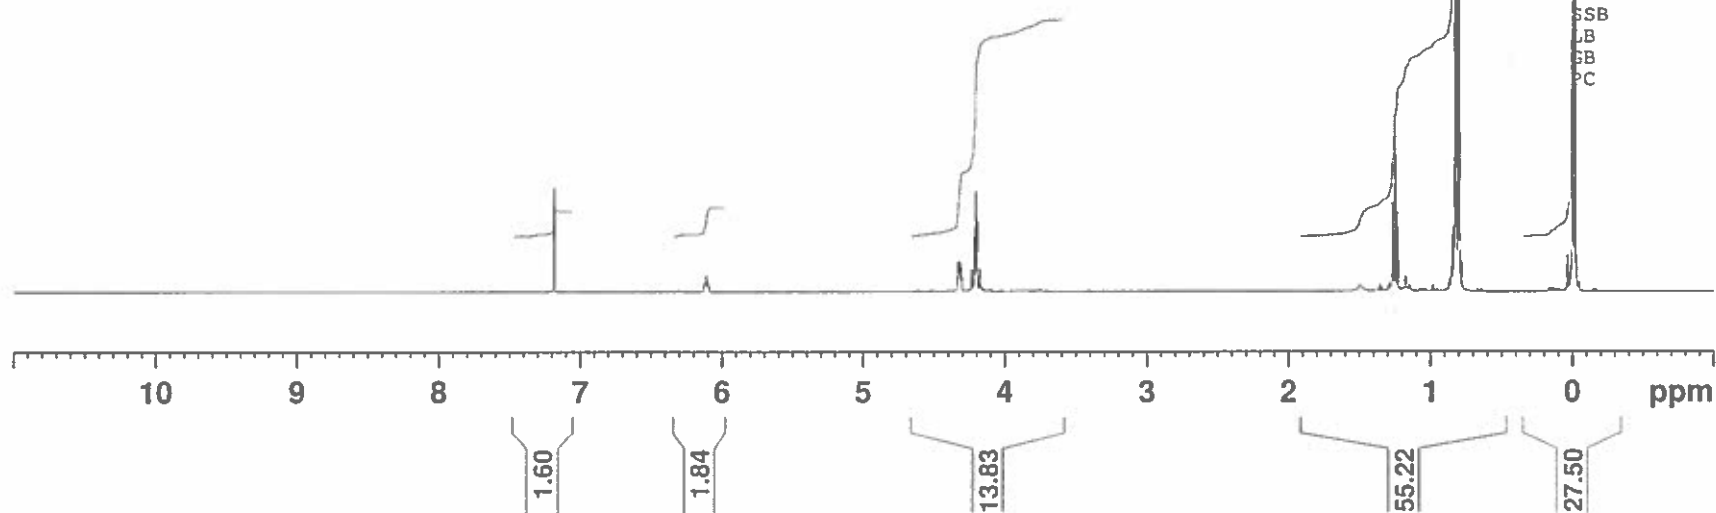

|                        |                                                                                                                                            |                       |                                                                                                        |                                 |
|------------------------|--------------------------------------------------------------------------------------------------------------------------------------------|-----------------------|--------------------------------------------------------------------------------------------------------|---------------------------------|
| Acquisition Time (sec) | 1.3631                                                                                                                                     | Comment               | P. Mears EJ-PRM 65 Prod data 0513-008 mCARBON CDCl3 {E:\bruk400service_data\2013\May} Administrator 24 |                                 |
| Date                   | 10 May 2013 09:34:08                                                                                                                       | Date Stamp            | 10 May 2013 09:34:08                                                                                   |                                 |
| File Name              | \\ss7a.ds.man.ac.uk\vol5\VOL3\USERS\SNMRDATA\BRUK400SERVICE_DATA\2013\MAY\DATA\ADMINISTRATOR\NMR\2013-05-09-ADMINISTRATOR-24\12\PDATA\1\1R |                       |                                                                                                        |                                 |
| Frequency (MHz)        | 100.64                                                                                                                                     | Nucleus               | 13C                                                                                                    | Number of Transients 10240      |
| Origin                 | AV400_S                                                                                                                                    | Original Points Count | 32768                                                                                                  | Owner Administrator             |
| Points Count           | 32768                                                                                                                                      | Pulse Sequence        | zgpg30                                                                                                 | Receiver Gain 2050.00           |
| SW(cyclical) (Hz)      | 24038.46                                                                                                                                   | Solvent               | CHLOROFORM-d                                                                                           | Spectrum Offset (Hz) 10063.3350 |
| Spectrum Type          | STANDARD                                                                                                                                   | Sweep Width (Hz)      | 24037.73                                                                                               | Temperature (degree C) 25.100   |

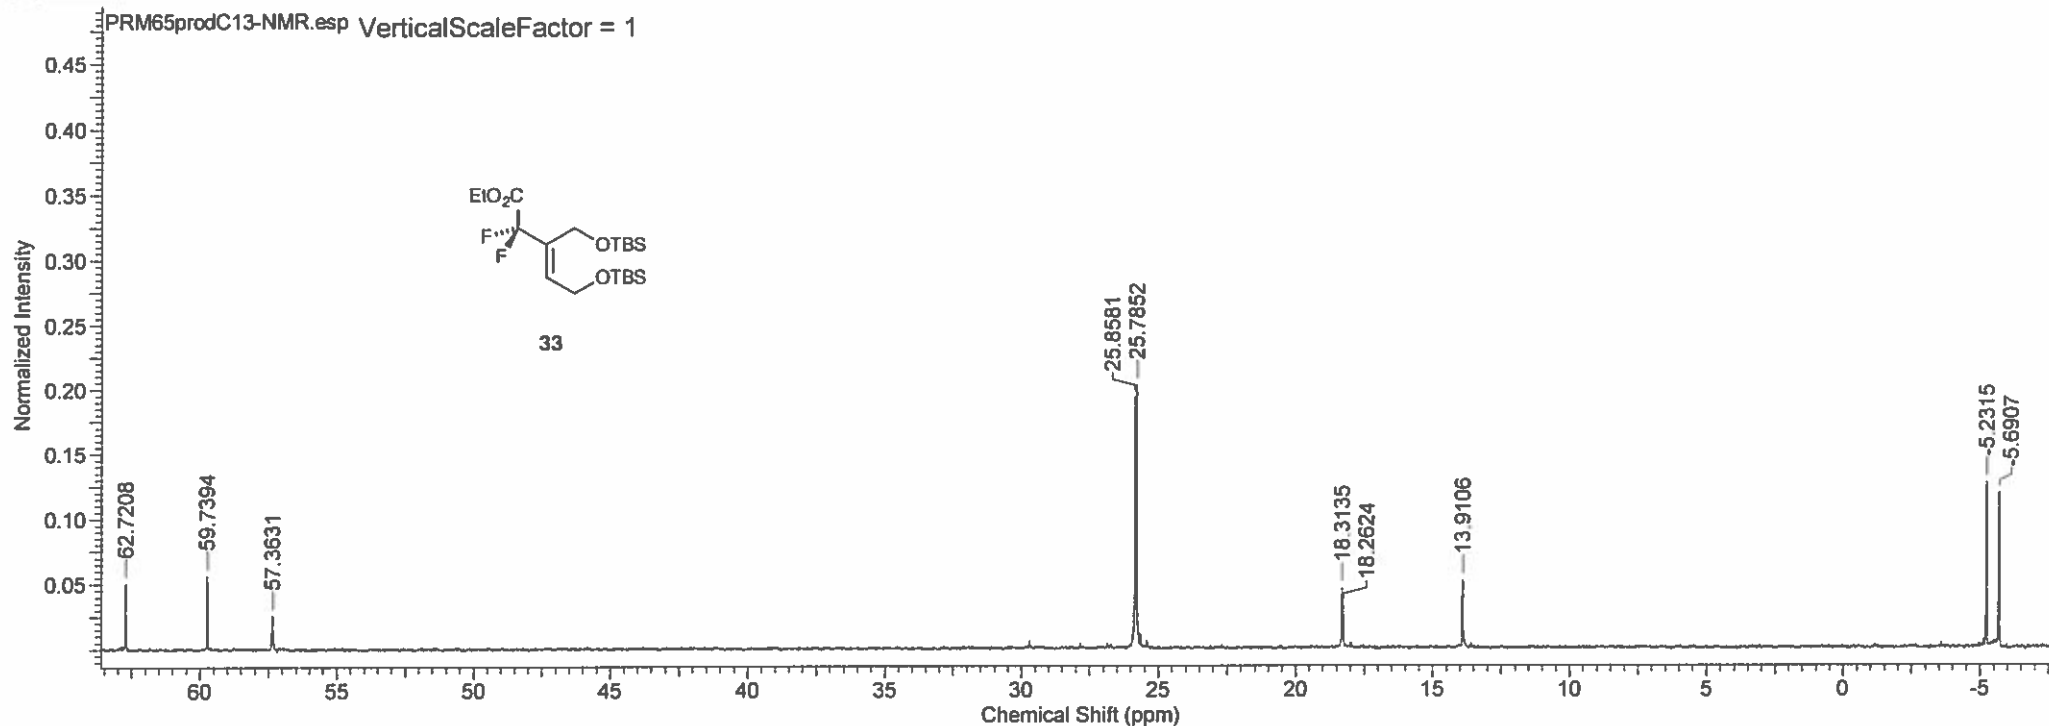

| No. | (ppm) | (Hz)   | Height |
|-----|-------|--------|--------|-----|-------|--------|--------|-----|-------|--------|--------|-----|-------|--------|--------|
| 1   | -5.69 | -572.7 | 0.1186 | 4   | 18.26 | 1837.9 | 0.0326 | 7   | 25.82 | 2598.6 | 0.0350 | 10  | 59.74 | 6012.1 | 0.0566 |
| 2   | -5.23 | -526.5 | 0.1268 | 5   | 18.31 | 1843.0 | 0.0457 | 8   | 25.86 | 2602.3 | 0.1934 | 11  | 62.72 | 6312.1 | 0.0509 |
| 3   | 13.91 | 1399.9 | 0.0515 | 6   | 25.79 | 2595.0 | 0.2026 | 9   | 57.36 | 5772.9 | 0.0262 |     |       |        |        |

|                        |                                                                                                                                           |                       |                                                                                                        |                                 |
|------------------------|-------------------------------------------------------------------------------------------------------------------------------------------|-----------------------|--------------------------------------------------------------------------------------------------------|---------------------------------|
| Acquisition Time (sec) | 1.3631                                                                                                                                    | Comment               | P. Mears EJ-PRM 65 Prod data 0513-008 mCARBON CDCl3 (E:\bruk400service_data\2013\May) Administrator 24 |                                 |
| Date                   | 10 May 2013 09:34:08                                                                                                                      | Date Stamp            | 10 May 2013 09:34:08                                                                                   |                                 |
| File Name              | \\ss7a.ds.man.ac.uk\vol5\VOL3\USERS\SNMRDATA\BRUK400SERVICE_DATA\2013MAY\DATA\ADMINISTRATOR\NMR\2013-05-09-ADMINISTRATOR-24\12\PDATA\111R |                       |                                                                                                        |                                 |
| Frequency (MHz)        | 100.64                                                                                                                                    | Nucleus               | 13C                                                                                                    | Number of Transients 10240      |
| Origin                 | AV400_S                                                                                                                                   | Original Points Count | 32768                                                                                                  | Owner Administrator             |
| Points Count           | 32768                                                                                                                                     | Pulse Sequence        | zgpg30                                                                                                 | Receiver Gain 2050.00           |
| SW(cyclical) (Hz)      | 24038.46                                                                                                                                  | Solvent               | CHLOROFORM-d                                                                                           | Spectrum Offset (Hz) 10063.3350 |
| Spectrum Type          | STANDARD                                                                                                                                  | Sweep Width (Hz)      | 24037.73                                                                                               | Temperature (degree C) 25.100   |

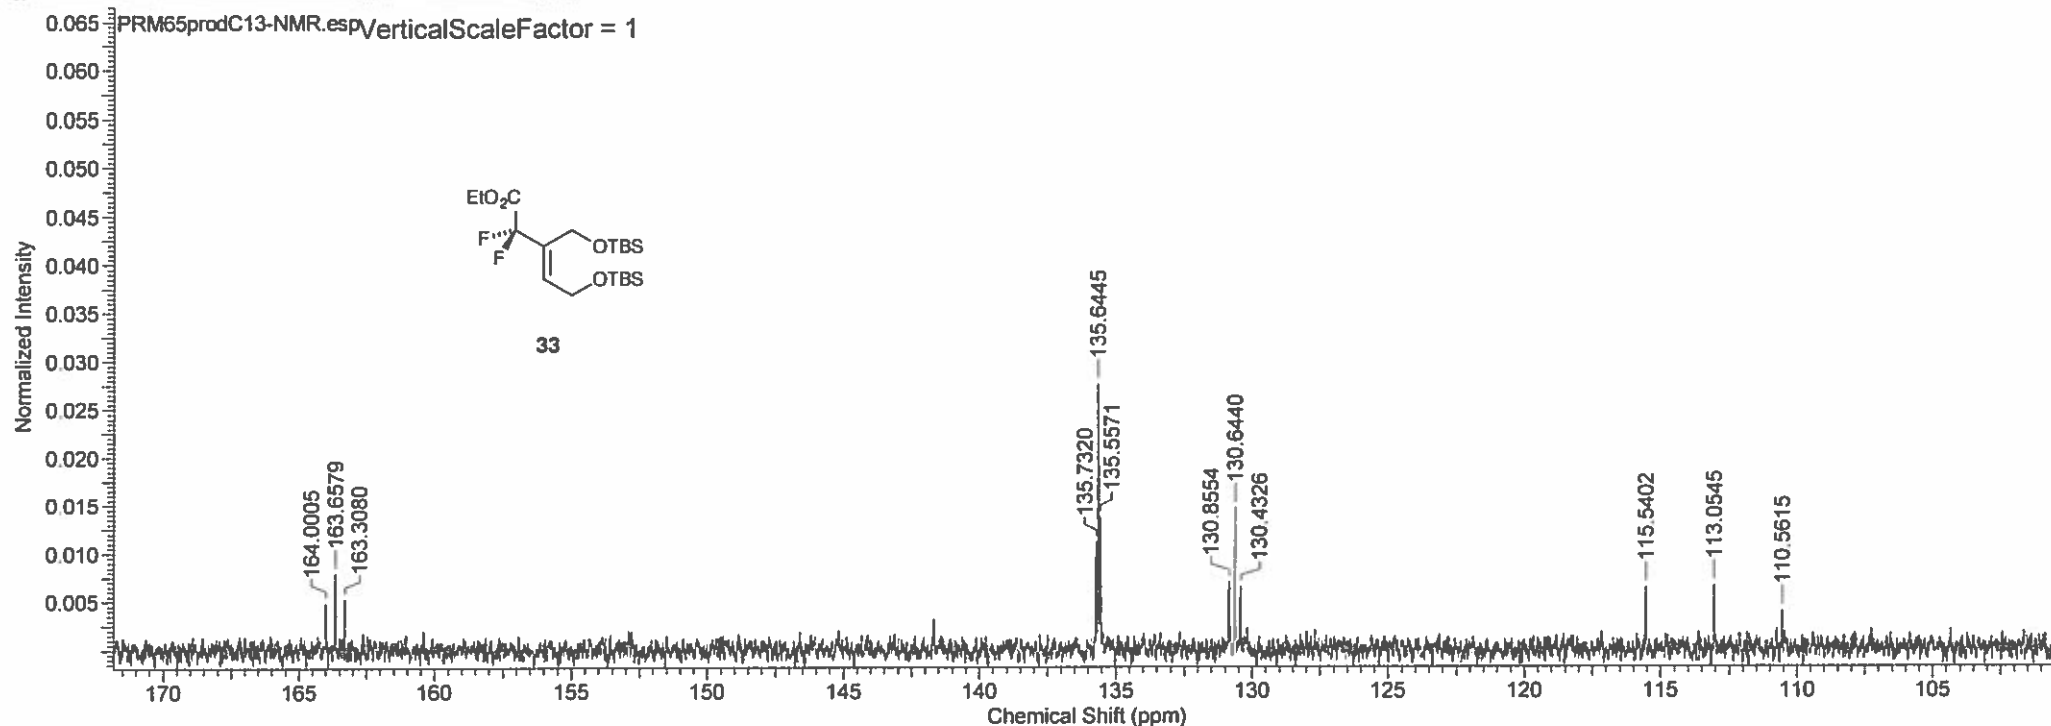

| No. | (ppm) | (Hz)   | Height | No. | (ppm) | (Hz)   | Height | No. | (ppm)  | (Hz)    | Height | No. | (ppm)  | (Hz)    | Height |
|-----|-------|--------|--------|-----|-------|--------|--------|-----|--------|---------|--------|-----|--------|---------|--------|
| 1   | -5.69 | -572.7 | 0.1186 | 6   | 25.79 | 2595.0 | 0.2026 | 11  | 62.72  | 6312.1  | 0.0509 | 16  | 130.64 | 13147.7 | 0.0146 |
| 2   | -5.23 | -526.5 | 0.1268 | 7   | 25.82 | 2598.6 | 0.0350 | 12  | 110.56 | 11126.7 | 0.0039 | 17  | 130.86 | 13169.0 | 0.0069 |
| 3   | 13.91 | 1399.9 | 0.0515 | 8   | 25.86 | 2602.3 | 0.1934 | 13  | 113.05 | 11377.6 | 0.0066 | 18  | 135.56 | 13642.2 | 0.0137 |
| 4   | 18.26 | 1837.9 | 0.0326 | 9   | 57.36 | 5772.9 | 0.0262 | 14  | 115.54 | 11627.7 | 0.0063 | 19  | 135.64 | 13651.0 | 0.0274 |
| 5   | 18.31 | 1843.0 | 0.0457 | 10  | 59.74 | 6012.1 | 0.0566 | 15  | 130.43 | 13126.5 | 0.0064 | 20  | 135.73 | 13659.8 | 0.0111 |
|     |       |        |        |     |       |        |        |     |        |         |        | 21  | 163.31 | 16435.0 | 0.0053 |
|     |       |        |        |     |       |        |        |     |        |         |        | 22  | 163.66 | 16470.2 | 0.0079 |
|     |       |        |        |     |       |        |        |     |        |         |        | 23  | 164.00 | 16504.7 | 0.0049 |

EJT-PRM65 1/s prod 10mg  
mF19 CDC13 {e:\bruk400data\2013\Feb} ejt 31

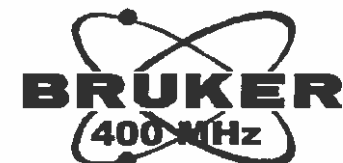

NAME 2013-02-14-ejt-31  
EXPNO 12  
PROCNO 1  
Date\_ 20130214  
Time 12.58  
INSTRUM AV400  
PROBHD 5 mm PABBO BB-  
PULPROG zg  
TD 131072  
SOLVENT CDC13  
NS 16  
DS 4  
SWH 89285.711 Hz  
FIDRES 0.681196 Hz  
AQ 0.7340532 sec  
RG 4100  
DW 5.600 usec  
DE 11.01 usec  
TE 292.9 K  
D1 1.00000000 sec  
TD0 1

===== CHANNEL f1 =====  
NUC1 19F  
P1 10.70 usec  
PL1 -5.00 dB  
PL1W 27.00716019 W  
SFO1 376.4607164 MHz  
SI 262144  
SF 376.4983660 MHz  
WDW EM  
SSB 0  
LB 0.30 Hz  
GB 0  
PC 2.00

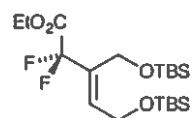

33

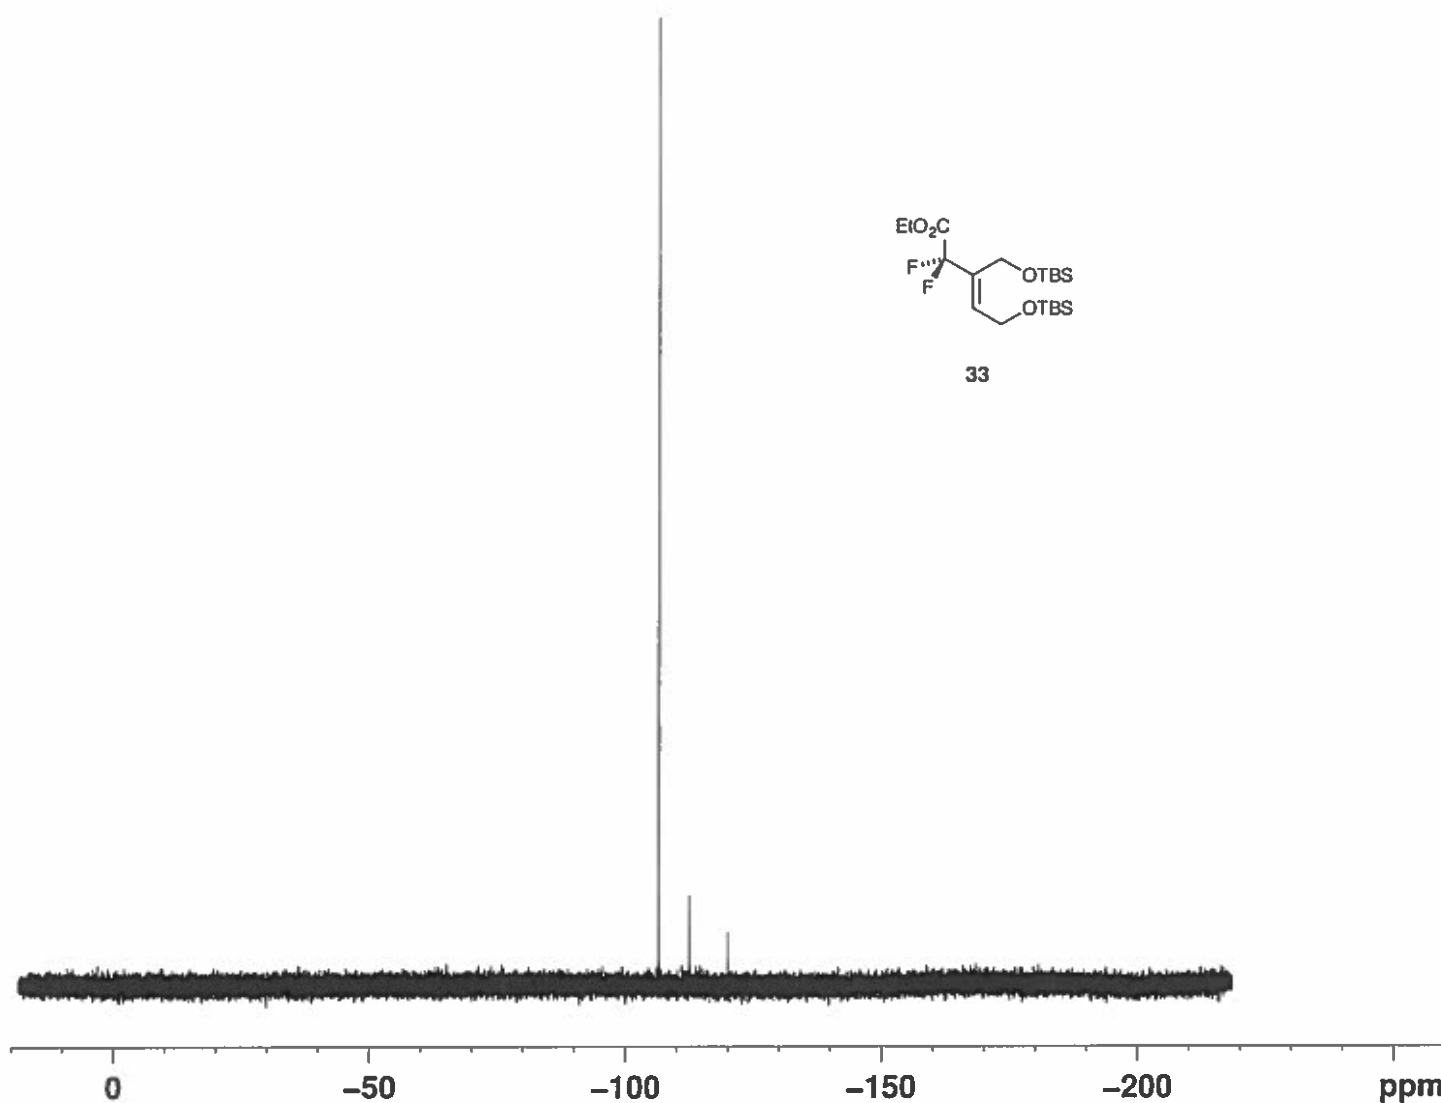



EJT-PRM58 f1-30 4mg  
mPROTON CDCl3 {e:\bruk400data\2013\Jan} ejt 19

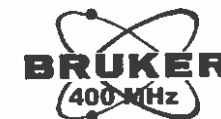

NAME 2013-01-24-ejt-19  
EXPNO 10  
PROCNO 1  
Date\_ 20130124  
Time\_ 16.25  
INSTRUM AV400  
PROBHD 5 mm PABBO BB-  
PULPROG zg30b  
TD 65536  
SOLVENT CDCl3  
NS 16  
DS 0  
SWH 8264.463 Hz  
FIDRES 0.126106 Hz  
AQ 3.9649780 sec  
RG 228  
DW 60.500 usec  
DE 9.40 usec  
TE 292.9 K  
D1 1.00000000 sec  
TD0 1

===== CHANNEL f1 =====  
NUC1 1H  
P1 10.00 usec  
PL1 -3.60 dB  
PL1W 17.83863831 W  
SFO1 400.1324710 MHz  
SI 32768  
SF 400.1300385 MHz  
WDW EM  
SSB 0  
LB 0.30 Hz  
GB 0  
PC 1.00

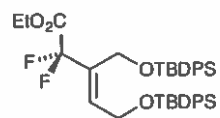

34

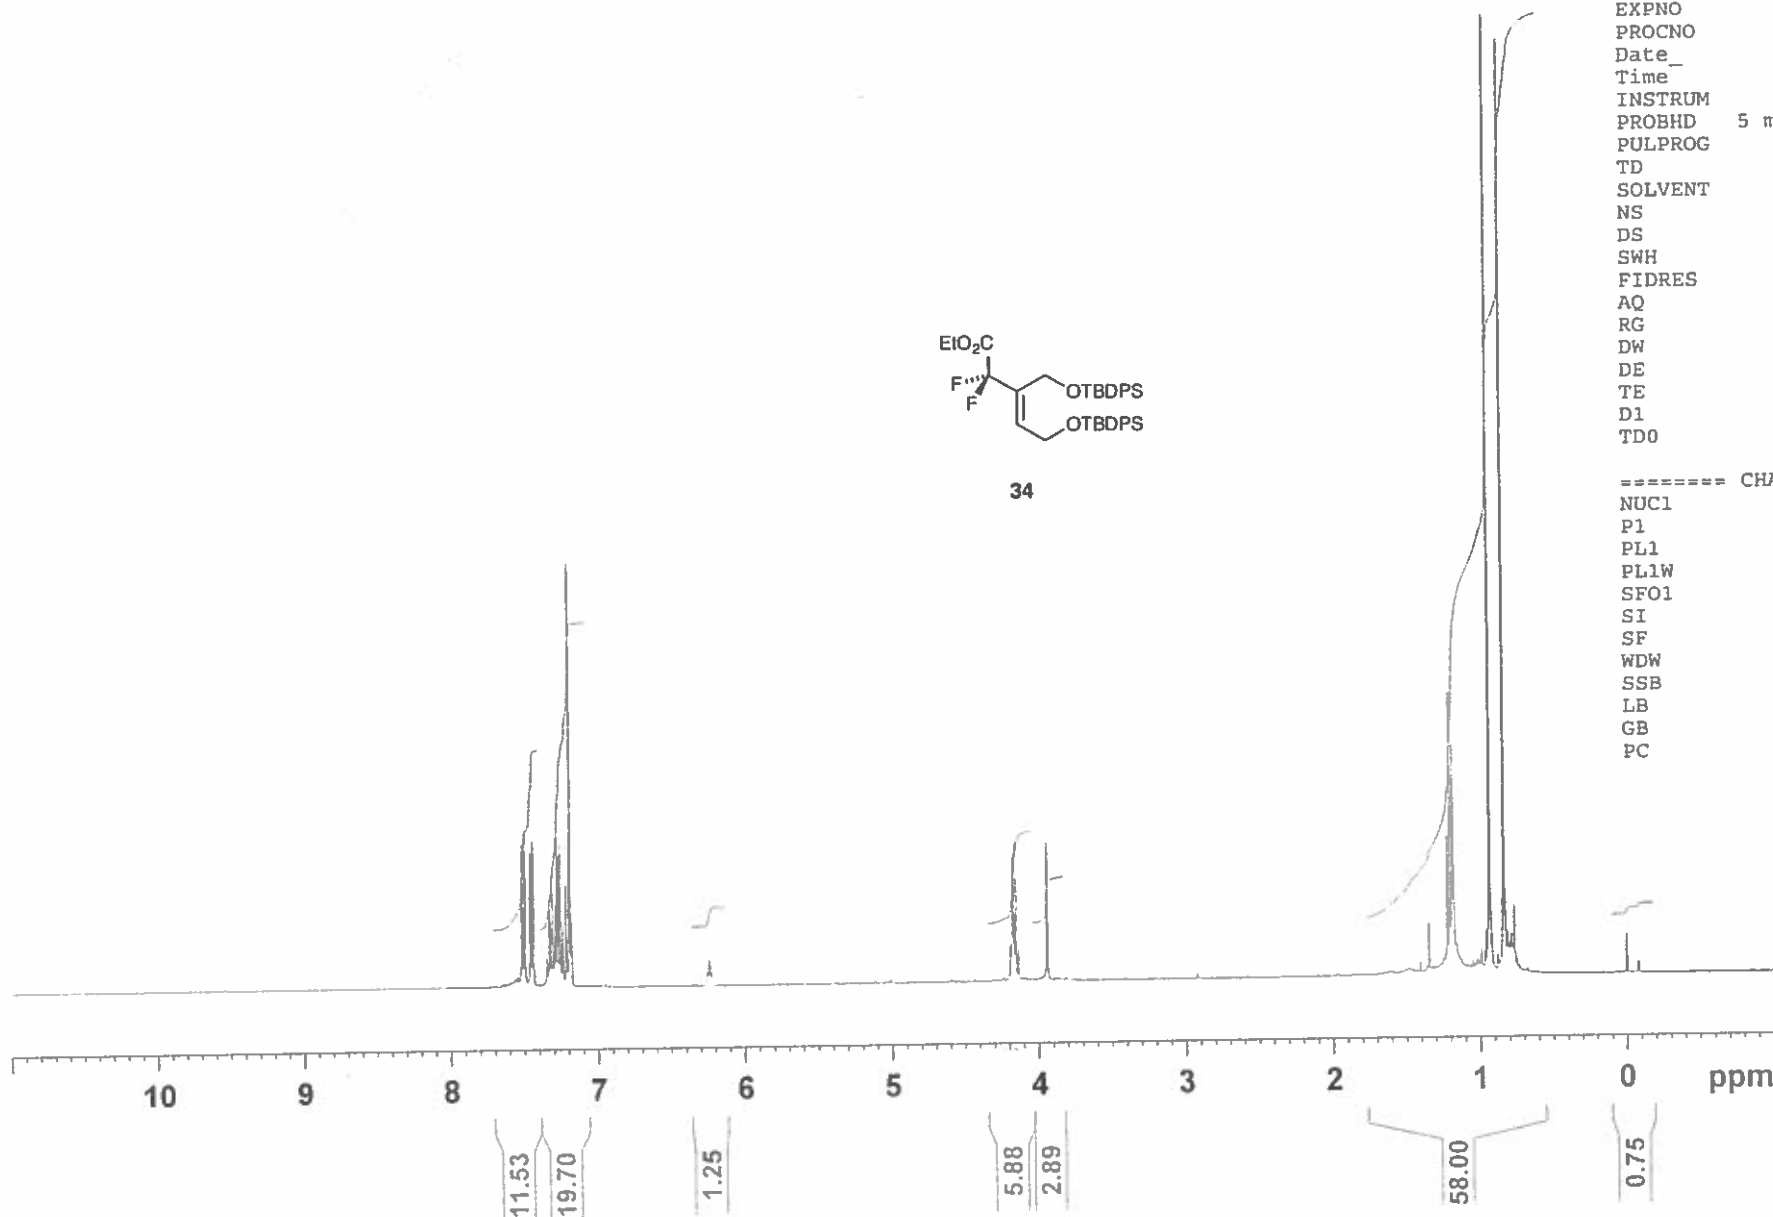

EJT-PRM58 f1-30 4mg  
mF19CPD CDCl3 {e:\bruk400data\2013\Jan} ejt 19

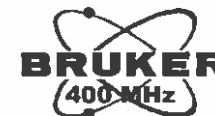

-103.94  
-104.94  
-105.74  
-105.85

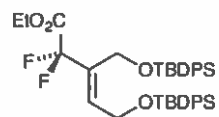

34

NAME 2013-01-24-ejt-19  
EXPNO 12  
PROCNO 1  
Date 20130124  
Time 16.28  
INSTRUM AV400  
PROBHD 5 mm PABBO BB-  
PULPROG zgig  
TD 131072  
SOLVENT CDCl3  
NS 16  
DS 4  
SWH 89285.711 Hz  
FIDRES 0.681196 Hz  
AQ 0.7340532 sec  
RG 4100  
DW 5.600 usec  
DE 7.51 usec  
TE 293.0 K  
D1 1.00000000 sec  
D11 0.03000000 sec  
TDO 1

===== CHANNEL f1 =====  
NUC1 19F  
P1 10.70 usec  
PL1 -5.00 dB  
PL1W 27.00716019 W  
SFO1 376.4607164 MHz

===== CHANNEL f2 =====  
CPDPRG2 waltz16  
NUC2 1H  
PCPD2 90.00 usec  
PL2 -3.60 dB  
PL12 15.31 dB  
PL2W 17.83863831 W  
PL12W 0.22927761 W  
SFO2 400.1316005 MHz  
SI 262144  
SF 376.4983660 MHz  
WDW EM  
SSB 0  
LB 0.30 Hz  
GB 0  
PC 2.00

0 -20 -40 -60 -80 -100 -120 -140 -160 -180 -200 -220 ppm

EJT-PRM78 Prod data  
mPROTONnight CDCl<sub>3</sub> /opt/oldbruk500data.11vii11/2013/May ejt 23

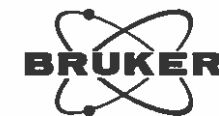

NAME 2013-05-06-ejt-23  
EXPNO 14  
PROCNO 1  
Date\_ 20130506  
Time 23.20  
INSTRUM spect  
PROBHD 5 mm PABBO BB-  
PULPROG zg30b  
TD 65536  
SOLVENT CDCl<sub>3</sub>  
NS 16  
DS 0  
SWH 10330.578 Hz  
FIDRES 0.157632 Hz  
AQ 3.1719923 sec  
RG 18  
DW 48.400 usec  
DE 13.00 usec  
TE 300.0 K  
D1 1.00000000 sec  
TD0 1

===== CHANNEL f1 =====  
NUC1 1H  
P1 10.00 usec  
PL1 -0.10 dB  
PL1W 26.21803665 W  
SFO1 500.1330885 MHz  
SI 32768  
SF 500.1300840 MHz  
WDW EM  
SSB 0  
LB 0.30 Hz  
GB 0  
PC 1.00

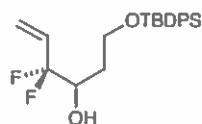

40

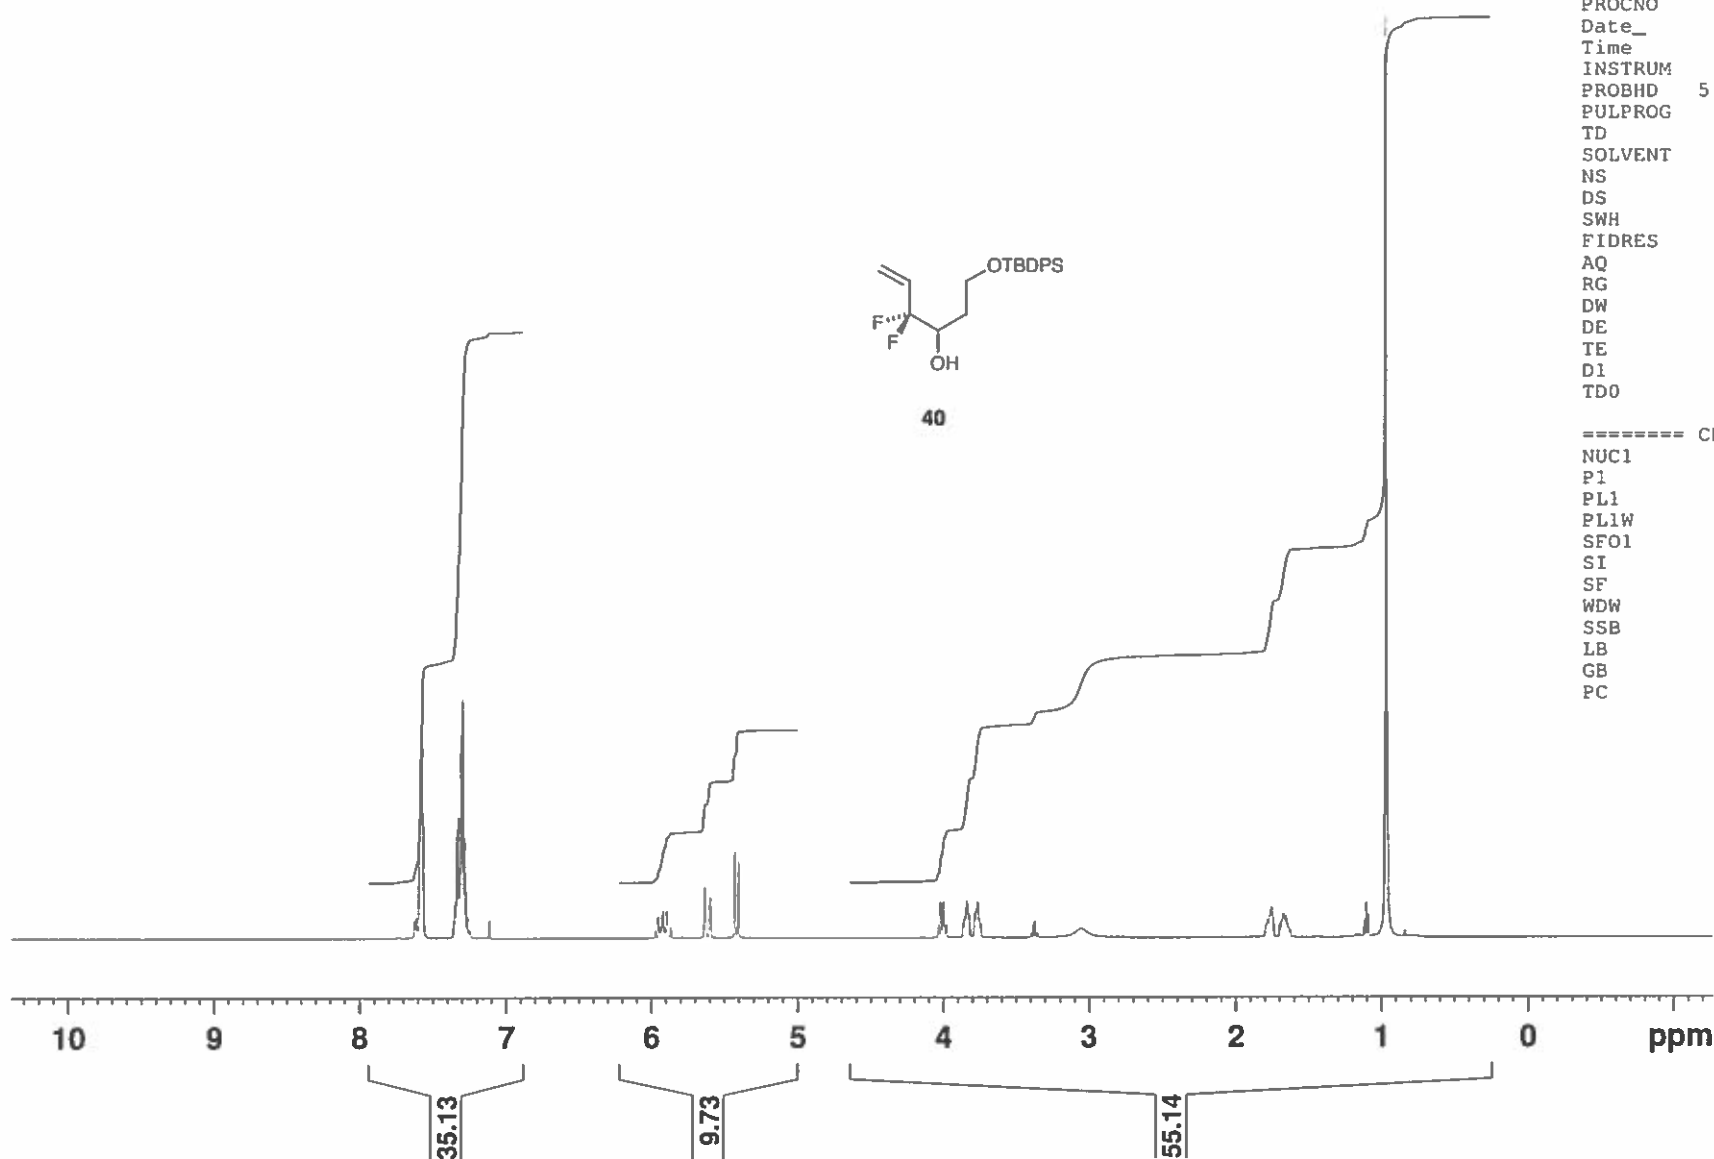

|                        |                                                                                                                           |                   |                                                                                   |                        |              |                      |            |
|------------------------|---------------------------------------------------------------------------------------------------------------------------|-------------------|-----------------------------------------------------------------------------------|------------------------|--------------|----------------------|------------|
| Acquisition Time (sec) | 1.1010                                                                                                                    | Comment           | EJT-PRM78 Prod data mCARBONnight CDCl3 /opt/oldbruk500data.11vi11/2013/May ejt 23 |                        |              |                      |            |
| Date                   | 06 May 2013 22:20:00                                                                                                      | Date Stamp        | 06 May 2013 22:20:00                                                              |                        |              |                      |            |
| File Name              | \\ss7a.ds.man.ac.uk\vol5\VOL3\USERS\SNMRDATA\BRUK500DATA\BRUK500DATA\2013MAY\DATA\EJT\NMR\2013-05-06-EJT-23\10\PDAT\11\1R |                   |                                                                                   |                        |              |                      |            |
| Frequency (MHz)        | 125.76                                                                                                                    | Nucleus           | <sup>13</sup> C                                                                   | Number of Transients   | 3000         | Origin               | spect      |
| Original Points Count  | 32768                                                                                                                     | Owner             | vnmr1                                                                             | Points Count           | 32768        | Pulse Sequence       | zgpg30     |
| Receiver Gain          | 512.00                                                                                                                    | SW(cyclical) (Hz) | 29761.90                                                                          | Solvent                | CHLOROFORM-d | Spectrum Offset (Hz) | 12562.9922 |
| Spectrum Type          | STANDARD                                                                                                                  | Sweep Width (Hz)  | 29761.00                                                                          | Temperature (degree C) | 25.128       |                      |            |

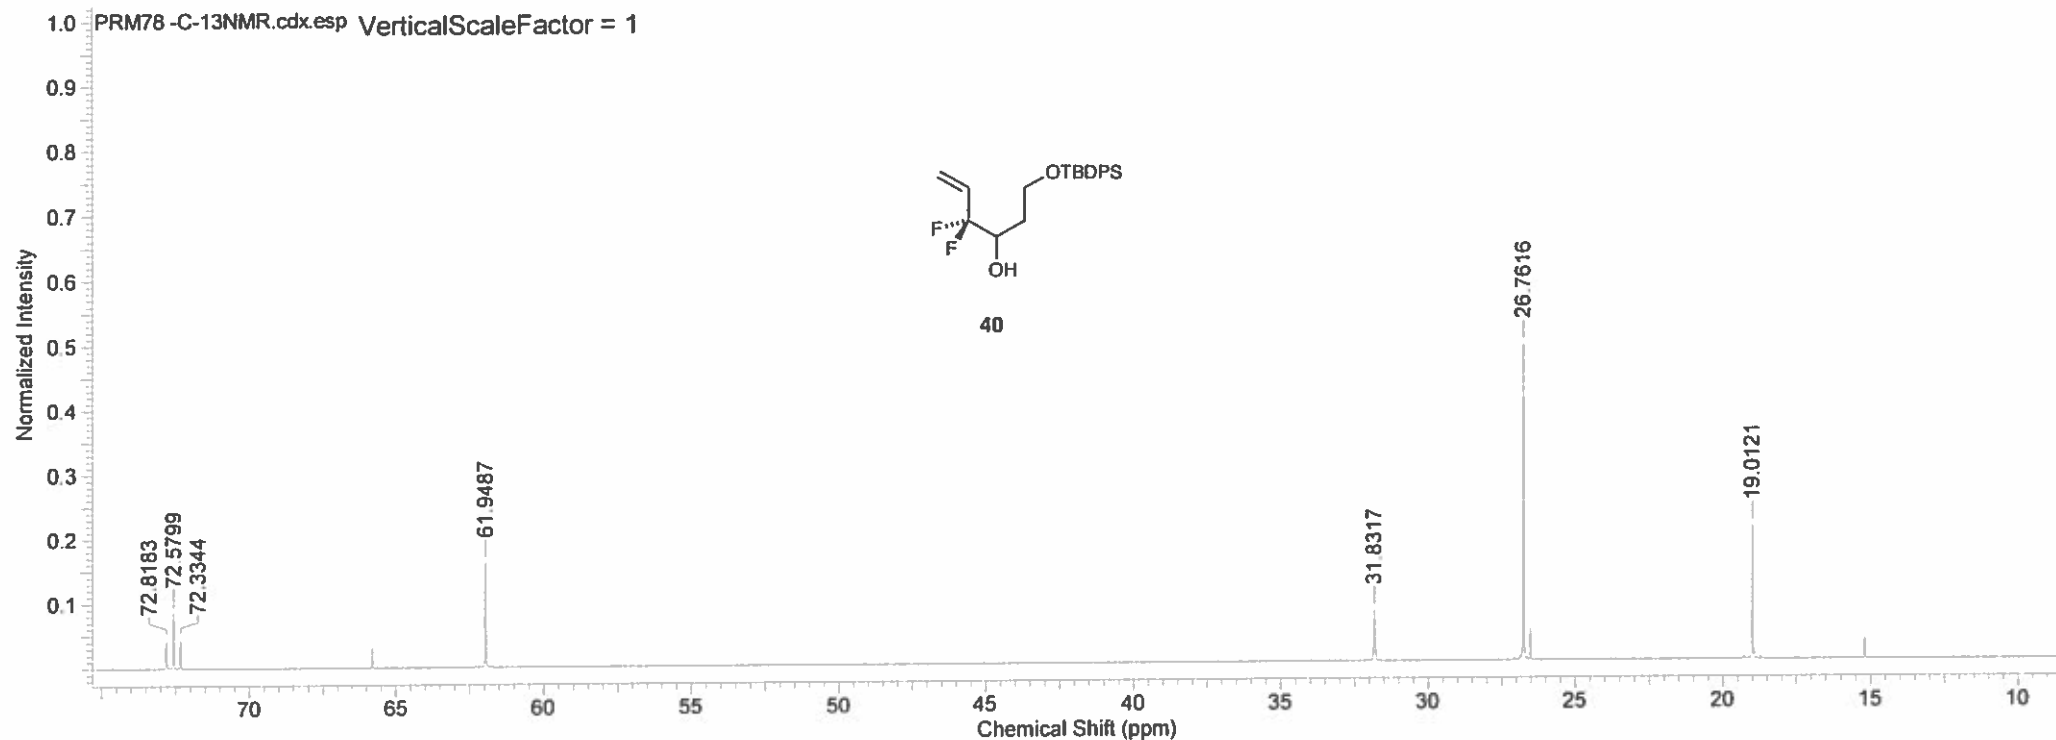

| No. | (ppm) | (Hz)   | Height |
|-----|-------|--------|--------|
| 1   | 19.01 | 2390.9 | 0.2061 |
| 2   | 26.76 | 3365.5 | 0.4888 |
| 3   | 31.83 | 4003.1 | 0.0785 |
| 4   | 61.95 | 7790.5 | 0.1612 |
| 5   | 72.33 | 9096.6 | 0.0455 |
| 6   | 72.58 | 9127.5 | 0.0859 |
| 7   | 72.82 | 9157.5 | 0.0440 |

|                        |                                                                                                                           |                   |                                                                                    |                        |              |                      |            |
|------------------------|---------------------------------------------------------------------------------------------------------------------------|-------------------|------------------------------------------------------------------------------------|------------------------|--------------|----------------------|------------|
| Acquisition Time (sec) | 1.1010                                                                                                                    | Comment           | EJT-PRM78 Prod data mCARBONnight CDCI3 /opt/oldbruk500data.11vii11/2013/May ejt 23 |                        |              |                      |            |
| Date                   | 06 May 2013 22:20:00                                                                                                      | Date Stamp        | 06 May 2013 22:20:00                                                               |                        |              |                      |            |
| File Name              | \\ss7a.ds.man.ac.uk\vol5\VOL3\USERS\SNMRDATA\BRUK500DATA\BRUK500DATA\2013MAY\DATA\EJT\NMR\2013-05-06-EJT-23\10\PDATA\111R |                   |                                                                                    |                        |              |                      |            |
| Frequency (MHz)        | 125.76                                                                                                                    | Nucleus           | 13C                                                                                | Number of Transients   | 3000         | Origin               | spect      |
| Original Points Count  | 32768                                                                                                                     | Owner             | nmr1                                                                               | Points Count           | 32768        | Pulse Sequence       | zgpg30     |
| Receiver Gain          | 512.00                                                                                                                    | SW(cyclical) (Hz) | 29761.90                                                                           | Solvent                | CHLOROFORM-d | Spectrum Offset (Hz) | 12562.9922 |
| Spectrum Type          | STANDARD                                                                                                                  | Sweep Width (Hz)  | 29761.00                                                                           | Temperature (degree C) | 25.128       |                      |            |

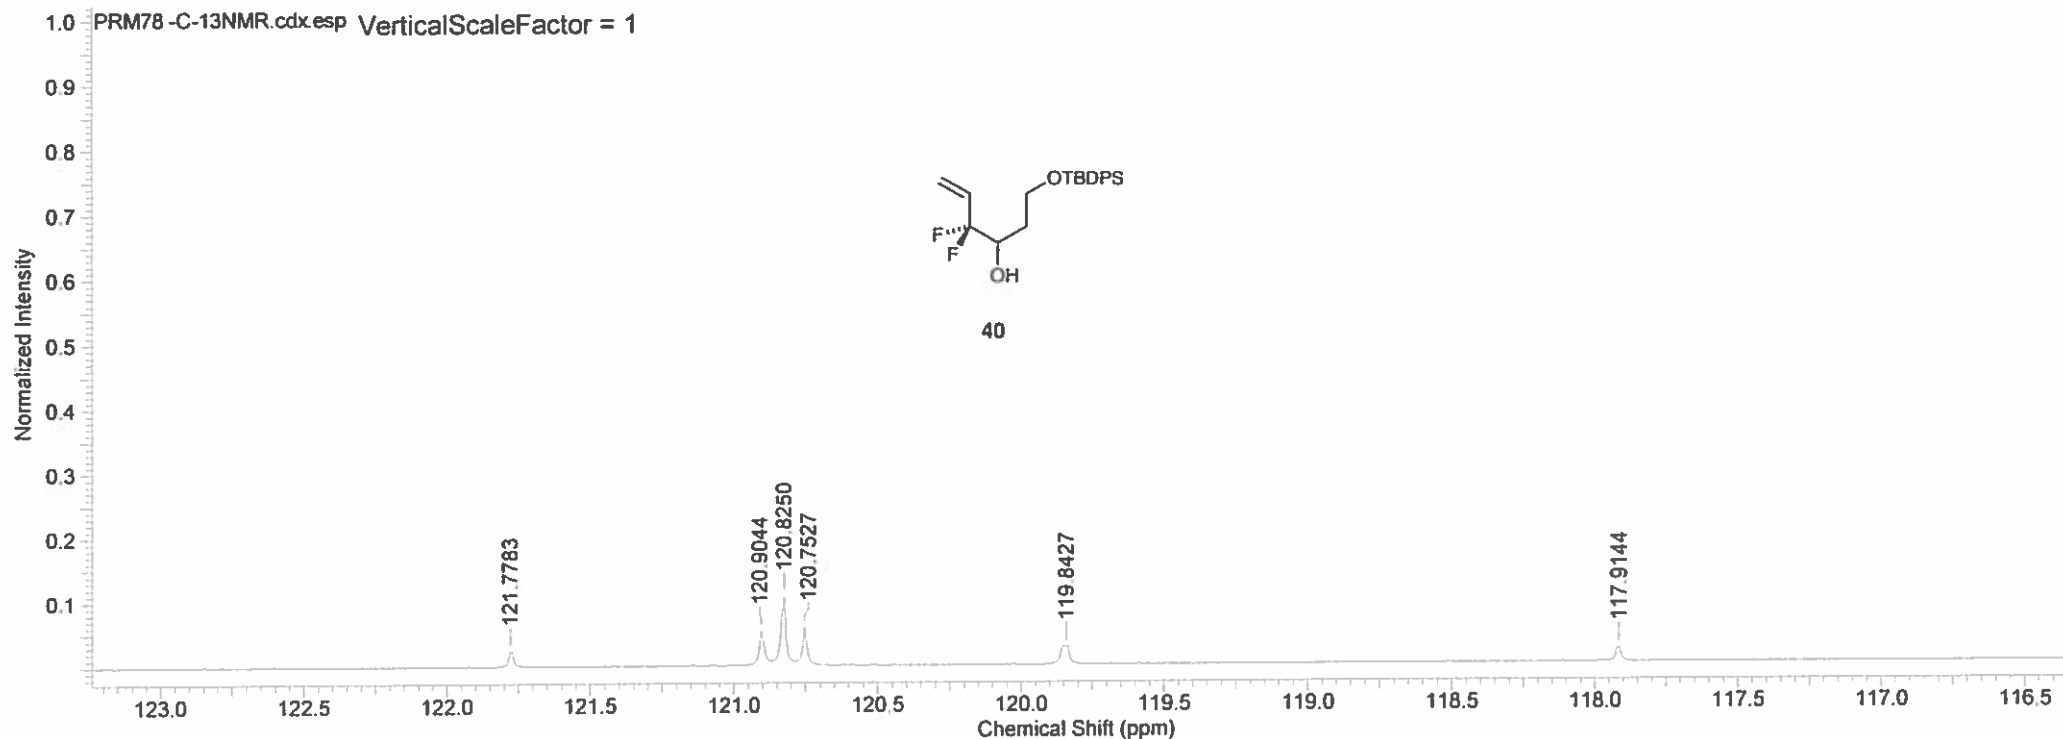

| No. | (ppm) | (Hz)   | Height | No. | (ppm)  | (Hz)    | Height | No. | (ppm)  | (Hz)    | Height | No. | (ppm)  | (Hz)    | Height |
|-----|-------|--------|--------|-----|--------|---------|--------|-----|--------|---------|--------|-----|--------|---------|--------|
| 1   | 19.01 | 2390.9 | 0.2061 | 6   | 72.58  | 9127.5  | 0.0859 | 11  | 120.82 | 15194.7 | 0.1070 | 16  | 129.58 | 16295.5 | 0.0367 |
| 2   | 26.76 | 3365.5 | 0.4888 | 7   | 72.82  | 9157.5  | 0.0440 | 12  | 120.90 | 15204.7 | 0.0546 | 17  | 129.87 | 16331.8 | 0.3682 |
| 3   | 31.83 | 4003.1 | 0.0785 | 8   | 117.91 | 14828.6 | 0.0221 | 13  | 121.78 | 15314.6 | 0.0234 | 18  | 129.90 | 16335.5 | 0.0755 |
| 4   | 61.95 | 7790.5 | 0.1612 | 9   | 119.84 | 15071.2 | 0.0281 | 14  | 127.66 | 16053.9 | 0.0923 | 19  | 130.11 | 16361.8 | 0.1076 |
| 5   | 72.33 | 9096.6 | 0.0455 | 10  | 120.75 | 15185.6 | 0.0599 | 15  | 127.79 | 16071.2 | 1.0000 | 20  | 130.31 | 16387.2 | 0.0446 |
|     |       |        |        |     |        |         |        |     |        |         |        | 21  | 132.81 | 16701.5 | 0.1135 |
|     |       |        |        |     |        |         |        |     |        |         |        | 22  | 132.87 | 16709.7 | 0.1225 |
|     |       |        |        |     |        |         |        |     |        |         |        | 23  | 134.77 | 16948.5 | 0.0635 |
|     |       |        |        |     |        |         |        |     |        |         |        | 24  | 135.49 | 17038.4 | 0.6292 |

|                        |                                                                                                                            |                   |                                                                                   |                        |              |                                 |
|------------------------|----------------------------------------------------------------------------------------------------------------------------|-------------------|-----------------------------------------------------------------------------------|------------------------|--------------|---------------------------------|
| Acquisition Time (sec) | 1.1010                                                                                                                     | Comment           | EJT-PRM78 Prod data mCARBONnight CDCI3 /opt/oldbruk500data.11vii1/2013/May ejt 23 |                        |              |                                 |
| Date                   | 06 May 2013 22:20:00                                                                                                       | Date Stamp        | 06 May 2013 22:20:00                                                              |                        |              |                                 |
| File Name              | \\ss7a.ds.man.ac.uk\vol5\VOL3\USERS\SNMRDATA\BRUK500DATA\BRUK500DATA\2013\MAY\DATA\EJT\NMR\2013-05-06-EJT-23\10\PDAT\11\1R |                   |                                                                                   |                        |              |                                 |
| Frequency (MHz)        | 125.76                                                                                                                     | Nucleus           | 13C                                                                               | Number of Transients   | 3000         | Origin spect                    |
| Original Points Count  | 32768                                                                                                                      | Owner             | vnmr1                                                                             | Points Count           | 32768        | Pulse Sequence zgpg30           |
| Receiver Gain          | 512.00                                                                                                                     | SW(cyclical) (Hz) | 29761.90                                                                          | Solvent                | CHLOROFORM-d | Spectrum Offset (Hz) 12562.9922 |
| Spectrum Type          | STANDARD                                                                                                                   | Sweep Width (Hz)  | 29761.00                                                                          | Temperature (degree C) | 25.128       |                                 |

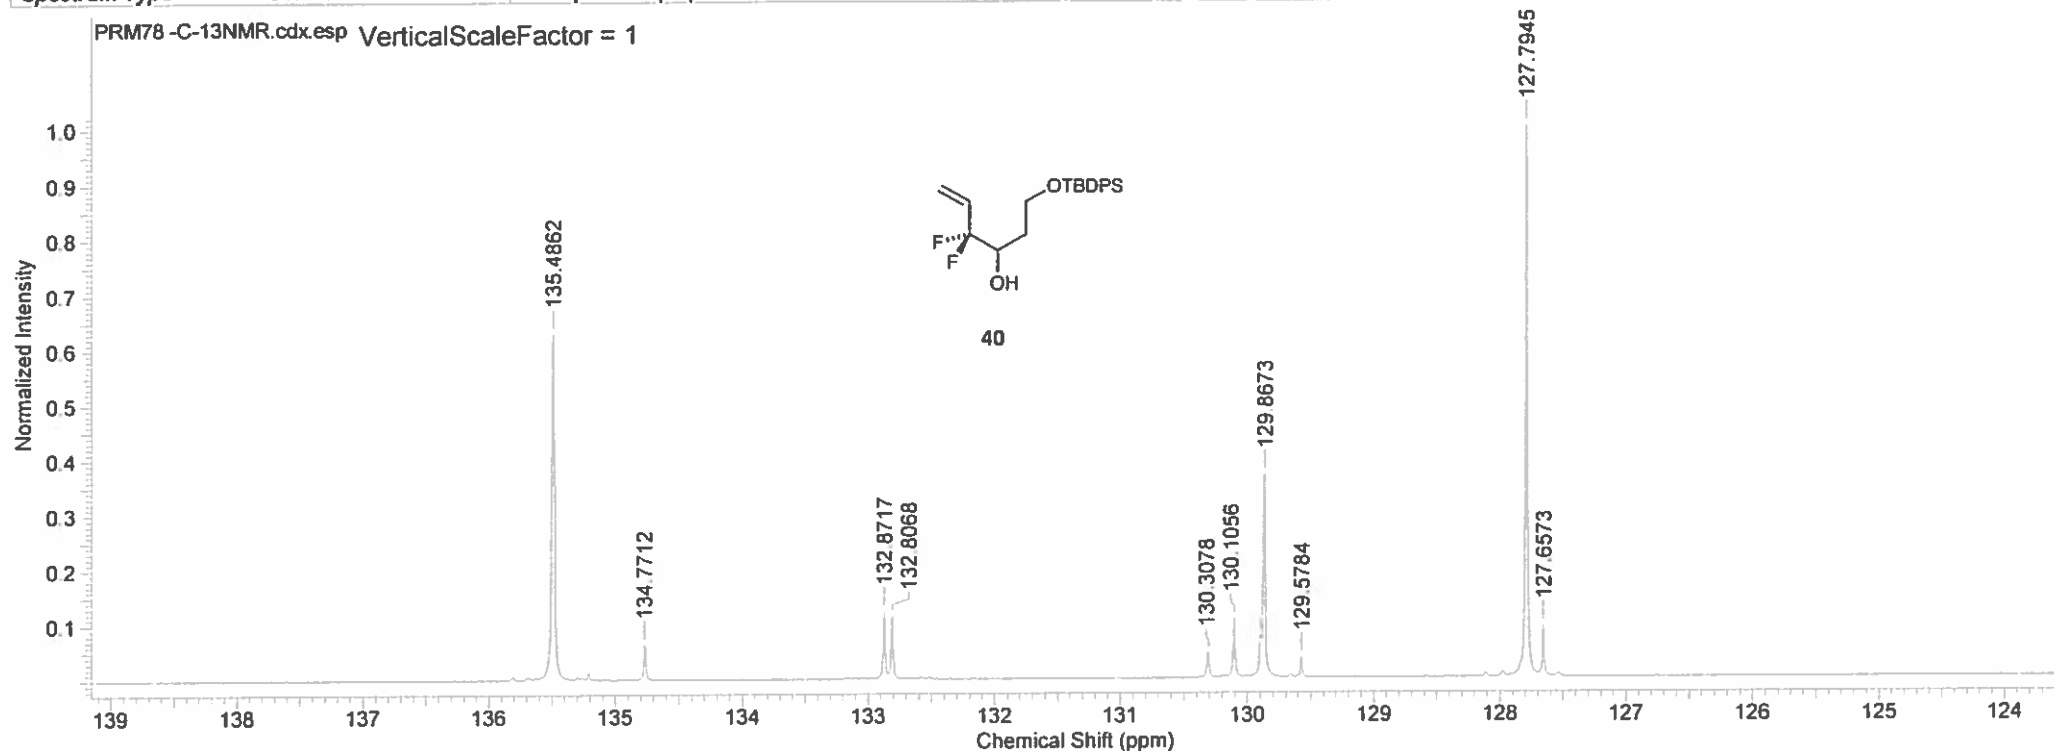

| No. | (ppm) | (Hz)   | Height | No. | (ppm)  | (Hz)    | Height | No. | (ppm)  | (Hz)    | Height | No. | (ppm)  | (Hz)    | Height |
|-----|-------|--------|--------|-----|--------|---------|--------|-----|--------|---------|--------|-----|--------|---------|--------|
| 1   | 19.01 | 2390.9 | 0.2061 | 6   | 72.58  | 9127.5  | 0.0859 | 11  | 120.82 | 15194.7 | 0.1070 | 16  | 129.58 | 16295.5 | 0.0367 |
| 2   | 26.76 | 3365.5 | 0.4888 | 7   | 72.82  | 9157.5  | 0.0440 | 12  | 120.90 | 15204.7 | 0.0546 | 17  | 129.87 | 16331.8 | 0.3682 |
| 3   | 31.83 | 4003.1 | 0.0785 | 8   | 117.91 | 14828.6 | 0.0221 | 13  | 121.78 | 15314.6 | 0.0234 | 18  | 129.90 | 16335.5 | 0.0755 |
| 4   | 61.95 | 7790.5 | 0.1612 | 9   | 119.84 | 15071.2 | 0.0281 | 14  | 127.66 | 16053.9 | 0.0923 | 19  | 130.11 | 16361.8 | 0.1076 |
| 5   | 72.33 | 9096.6 | 0.0455 | 10  | 120.75 | 15185.6 | 0.0599 | 15  | 127.79 | 16071.2 | 1.0000 | 20  | 130.31 | 16387.2 | 0.0446 |
|     |       |        |        |     |        |         |        |     |        |         |        | 21  | 132.81 | 16701.5 | 0.1135 |
|     |       |        |        |     |        |         |        |     |        |         |        | 22  | 132.87 | 16709.7 | 0.1225 |
|     |       |        |        |     |        |         |        |     |        |         |        | 23  | 134.77 | 16948.5 | 0.0635 |
|     |       |        |        |     |        |         |        |     |        |         |        | 24  | 135.49 | 17038.4 | 0.6292 |

|                        |                                                                                                                            |                   |                                                                               |                        |              |                      |             |
|------------------------|----------------------------------------------------------------------------------------------------------------------------|-------------------|-------------------------------------------------------------------------------|------------------------|--------------|----------------------|-------------|
| Acquisition Time (sec) | 0.5767                                                                                                                     | Comment           | EJT-PRM78 Prod data m19FCPD CDCI3 /opt/oldbruk500data.11vii11/2013/May ejt 23 |                        |              |                      |             |
| Date                   | 06 May 2013 22:24:16                                                                                                       | Date Stamp        | 06 May 2013 22:24:16                                                          |                        |              |                      |             |
| File Name              | \\ss7a.ds.man.ac.uk\vol5\VOL3\USERS\SNMRDATA\BRUK500DATA\BRUK500DATA\2013\MAY\DATA\EJT\NMR\2013-05-06-EJT-23\12\PDATA\111R |                   |                                                                               |                        |              |                      |             |
| Frequency (MHz)        | 470.59                                                                                                                     | Nucleus           | 19F                                                                           | Number of Transients   | 16           | Origin               | spect       |
| Original Points Count  | 65536                                                                                                                      | Owner             | vnmr1                                                                         | Points Count           | 65536        | Pulse Sequence       | zgfhgqn     |
| Receiver Gain          | 287.00                                                                                                                     | SW(cyclical) (Hz) | 113636.37                                                                     | Solvent                | CHLOROFORM-d | Spectrum Offset (Hz) | -47059.0234 |
| Spectrum Type          | STANDARD                                                                                                                   | Sweep Width (Hz)  | 113634.63                                                                     | Temperature (degree C) | 27.000       |                      |             |

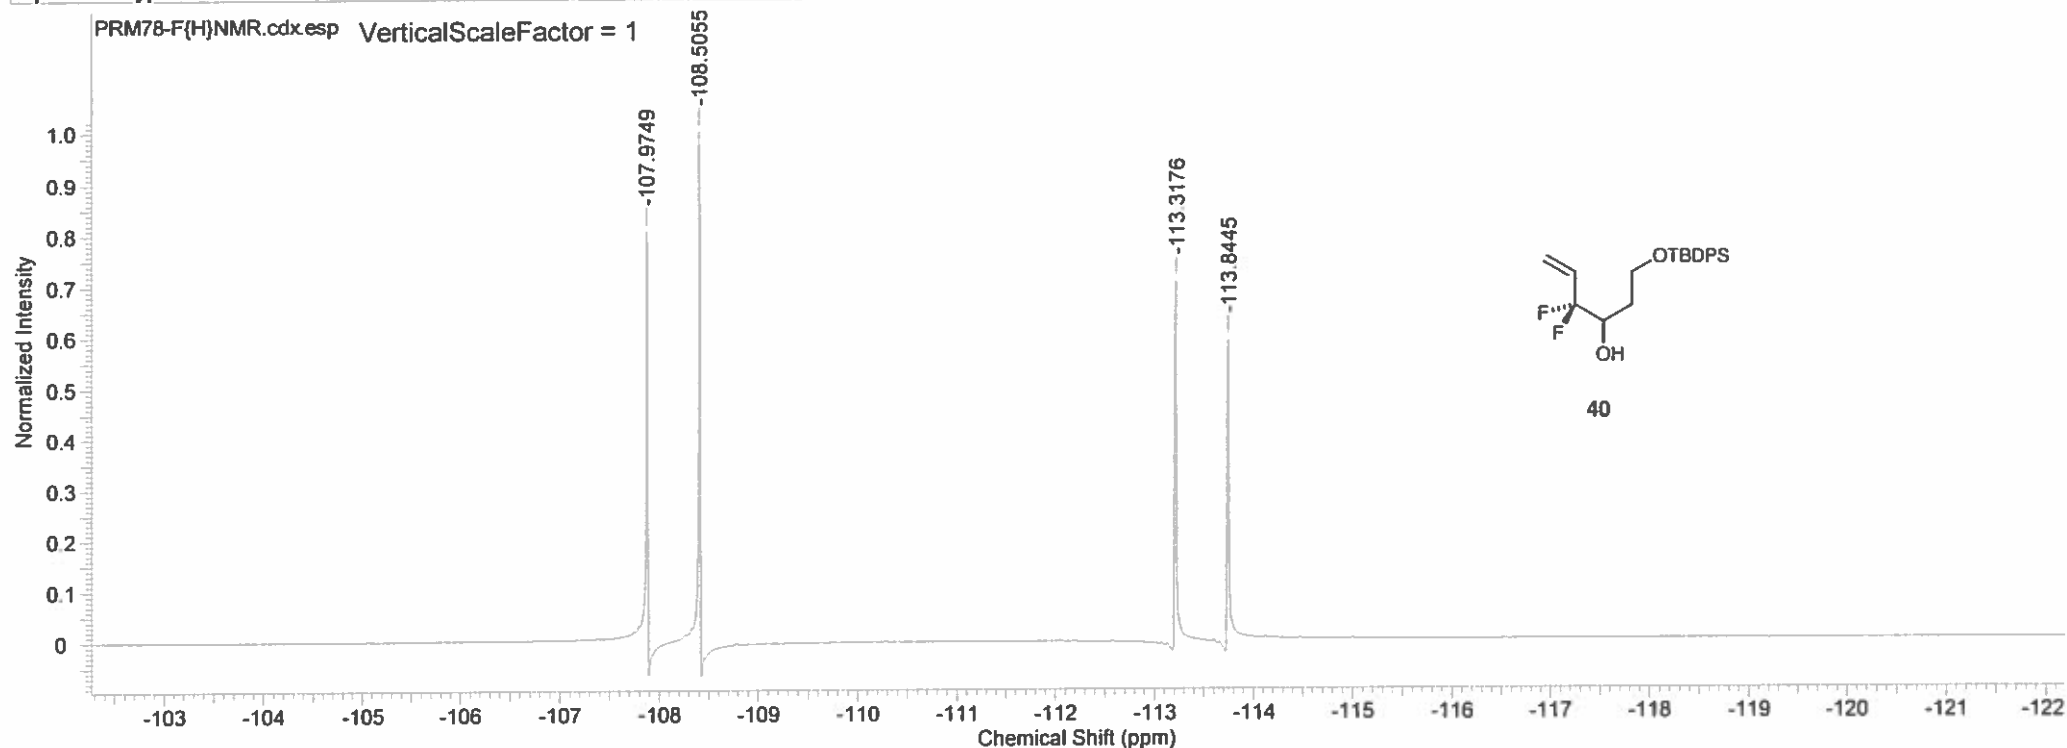

| No. | (ppm)   | (Hz)     | Height |
|-----|---------|----------|--------|
| 1   | -113.84 | -53574.4 | 0.5903 |
| 2   | -113.32 | -53326.4 | 0.7057 |
| 3   | -108.51 | -51061.9 | 1.0000 |
| 4   | -107.97 | -50812.2 | 0.8064 |

EJT-PRM77/79 Prod data  
mPROTONnight CDCl3 {e:\bruk400data\2013\Apr} ejt 49

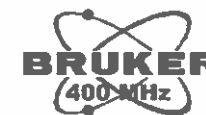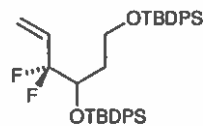

41

NAME 2013-04-25-ejt-49  
EXPNO 12  
PROCNO 1  
Date\_ 20130426  
Time 0.03  
INSTRUM AV400  
PROBHD 5 mm PABBO BB-  
PULPROG zg30b  
TD 65536  
SOLVENT CDCl3  
NS 16  
DS 0  
SWH 8264.463 Hz  
FIDRES 0.126106 Hz  
AQ 3.9649780 sec  
RG 90.5  
DW 60.500 usec  
DE 9.40 usec  
TE 291.9 K  
D1 1.00000000 sec  
TD0 1

===== CHANNEL f1 =====  
NUC1 1H  
P1 10.00 usec  
PL1 -3.60 dB  
PL1W 17.83863831 W  
SF01 400.1324710 MHz  
SI 32768  
SF 400.1300413 MHz  
WDW EM  
SSB 0  
LB 0.30 Hz  
GB 0  
PC 1.00

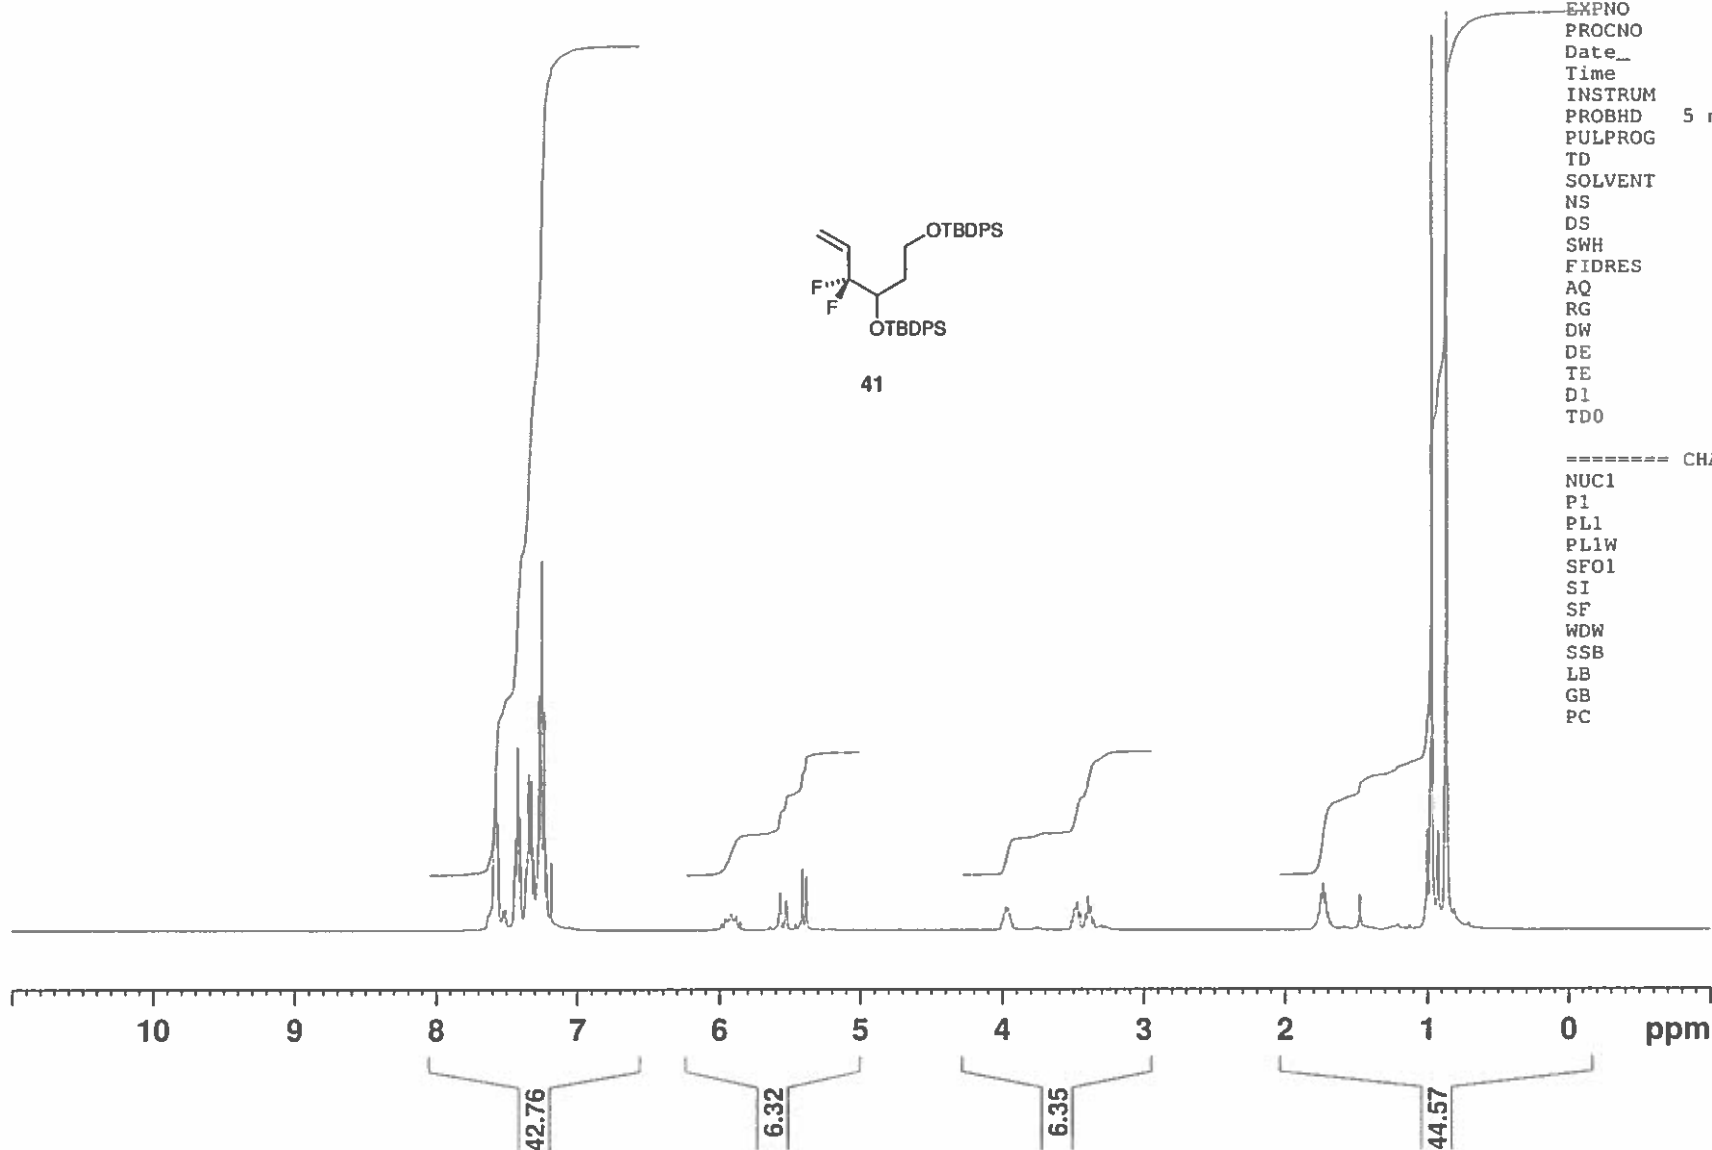



|                        |                                                                                                                |                   |                                                                            |                        |              |
|------------------------|----------------------------------------------------------------------------------------------------------------|-------------------|----------------------------------------------------------------------------|------------------------|--------------|
| Acquisition Time (sec) | 1.0835                                                                                                         | Comment           | EJT-PRM77/79 Prod data mCARBONnight CDCl3 (e:\bruk400data\2013\Apr) ejt 49 |                        |              |
| Date                   | 25 Apr 2013 23:47:28                                                                                           | Date Stamp        | 25 Apr 2013 23:47:28                                                       |                        |              |
| File Name              | \\ss7a.ds.man.ac.uk\vol5\VOL3\USERS\SNMRDATA\BRUK400DATA\2013\APR\DATA\EJT\NMR\2013-04-25-EJT-49\10\PDATA\111R |                   |                                                                            |                        |              |
| Frequency (MHz)        | 100.61                                                                                                         | Nucleus           | 13C                                                                        | Number of Transients   | 600          |
| Original Points Count  | 32768                                                                                                          | Owner             | Administrator                                                              | Points Count           | 32768        |
| Receiver Gain          | 512.00                                                                                                         | SW(cyclical) (Hz) | 30241.94                                                                   | Solvent                | CHLOROFORM-d |
| Spectrum Type          | STANDARD                                                                                                       | Sweep Width (Hz)  | 30241.01                                                                   | Temperature (degree C) | 19.400       |
|                        |                                                                                                                |                   |                                                                            | Origin                 | AV400        |
|                        |                                                                                                                |                   |                                                                            | Pulse Sequence         | zgpg30       |
|                        |                                                                                                                |                   |                                                                            | Spectrum Offset (Hz)   | 11297.1592   |

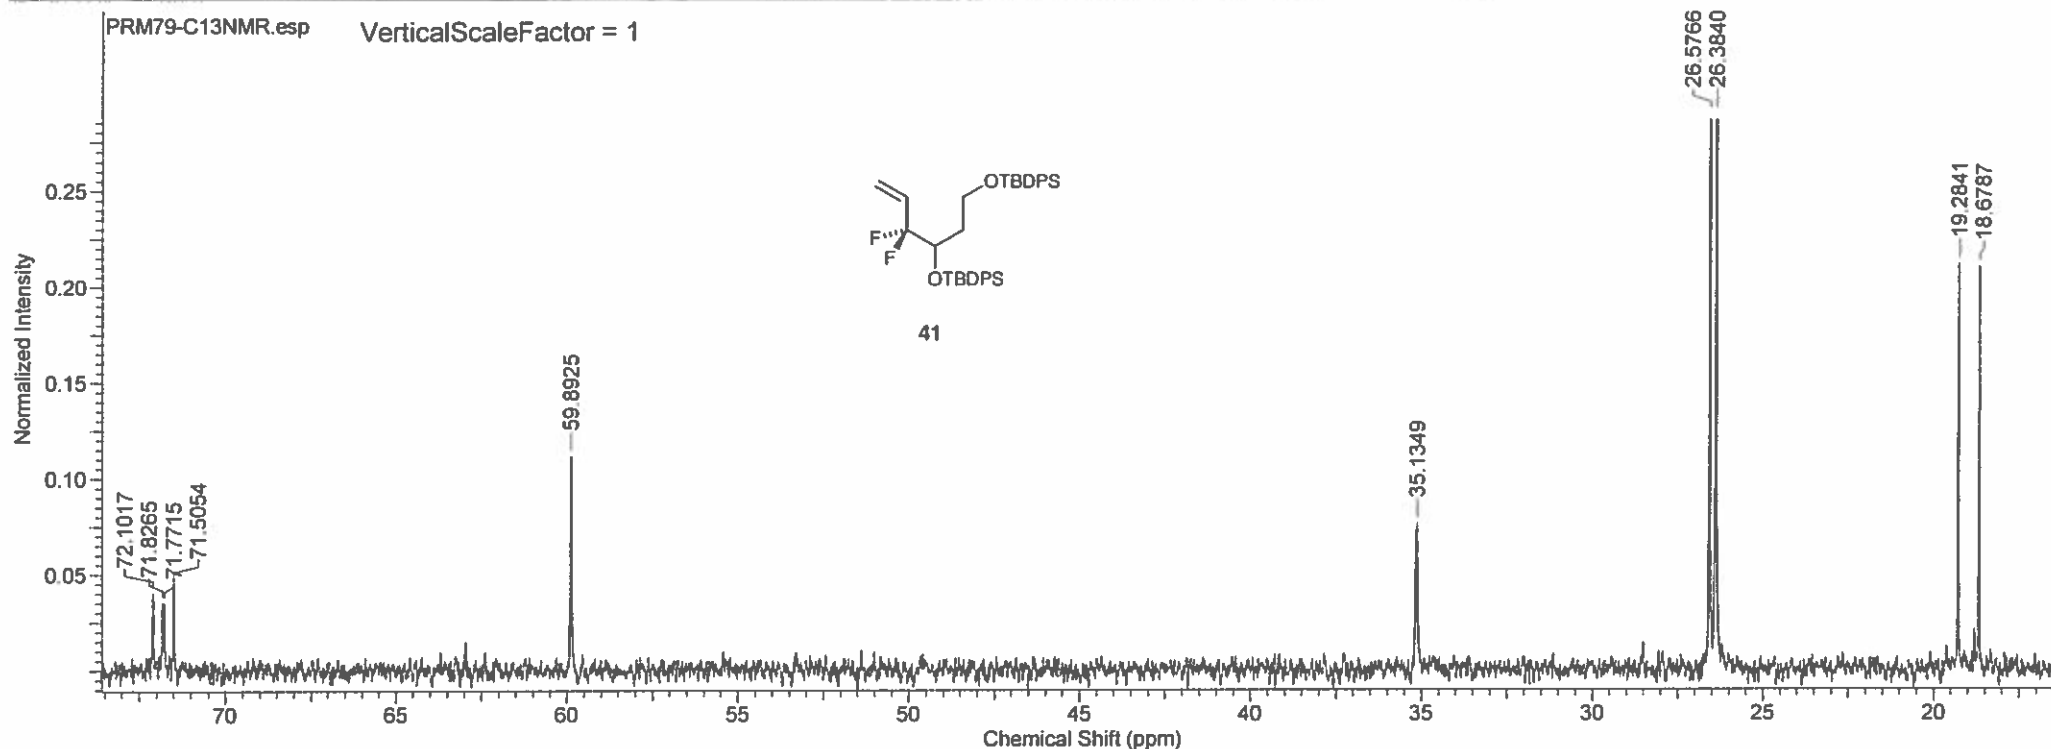

| No. | (ppm) | (Hz)   | Height |
|-----|-------|--------|--------|
| 1   | 18.68 | 1879.3 | 0.2102 |
| 2   | 19.28 | 1940.2 | 0.2114 |
| 3   | 26.38 | 2654.6 | 0.5291 |
| 4   | 26.58 | 2673.9 | 0.5033 |
| 5   | 35.13 | 3535.0 | 0.0761 |
| 6   | 59.89 | 6026.0 | 0.1114 |
| 7   | 71.51 | 7194.4 | 0.0453 |
| 8   | 71.77 | 7221.1 | 0.0348 |
| 9   | 71.83 | 7226.7 | 0.0355 |
| 10  | 72.10 | 7254.3 | 0.0405 |

|                        |                                                                                                               |                   |                                                                            |                        |              |
|------------------------|---------------------------------------------------------------------------------------------------------------|-------------------|----------------------------------------------------------------------------|------------------------|--------------|
| Acquisition Time (sec) | 1.0835                                                                                                        | Comment           | EJT-PRM77/79 Prod data mCARBONnight CDCl3 (e:\bruk400data\2013\Apr) ejt 49 |                        |              |
| Date                   | 25 Apr 2013 23:47:28                                                                                          | Date Stamp        | 25 Apr 2013 23:47:28                                                       |                        |              |
| File Name              | \\ss7a.ds.man.ac.uk\vol5\VOL3\USERS\SNMRDATA\BRUK400DATA\2013\APR\DATA\EJT\NMR\2013-04-25-EJT-49\10\PDAT\111R |                   |                                                                            |                        |              |
| Frequency (MHz)        | 100.61                                                                                                        | Nucleus           | 13C                                                                        | Number of Transients   | 600          |
| Original Points Count  | 32768                                                                                                         | Owner             | Administrator                                                              | Points Count           | 32768        |
| Receiver Gain          | 512.00                                                                                                        | SW(cyclical) (Hz) | 30241.94                                                                   | Solvent                | CHLOROFORM-d |
| Spectrum Type          | STANDARD                                                                                                      | Sweep Width (Hz)  | 30241.01                                                                   | Temperature (degree C) | 19.400       |
|                        |                                                                                                               |                   |                                                                            | Origin                 | AV400        |
|                        |                                                                                                               |                   |                                                                            | Pulse Sequence         | zgpg30       |
|                        |                                                                                                               |                   |                                                                            | Spectrum Offset (Hz)   | 11297.1592   |

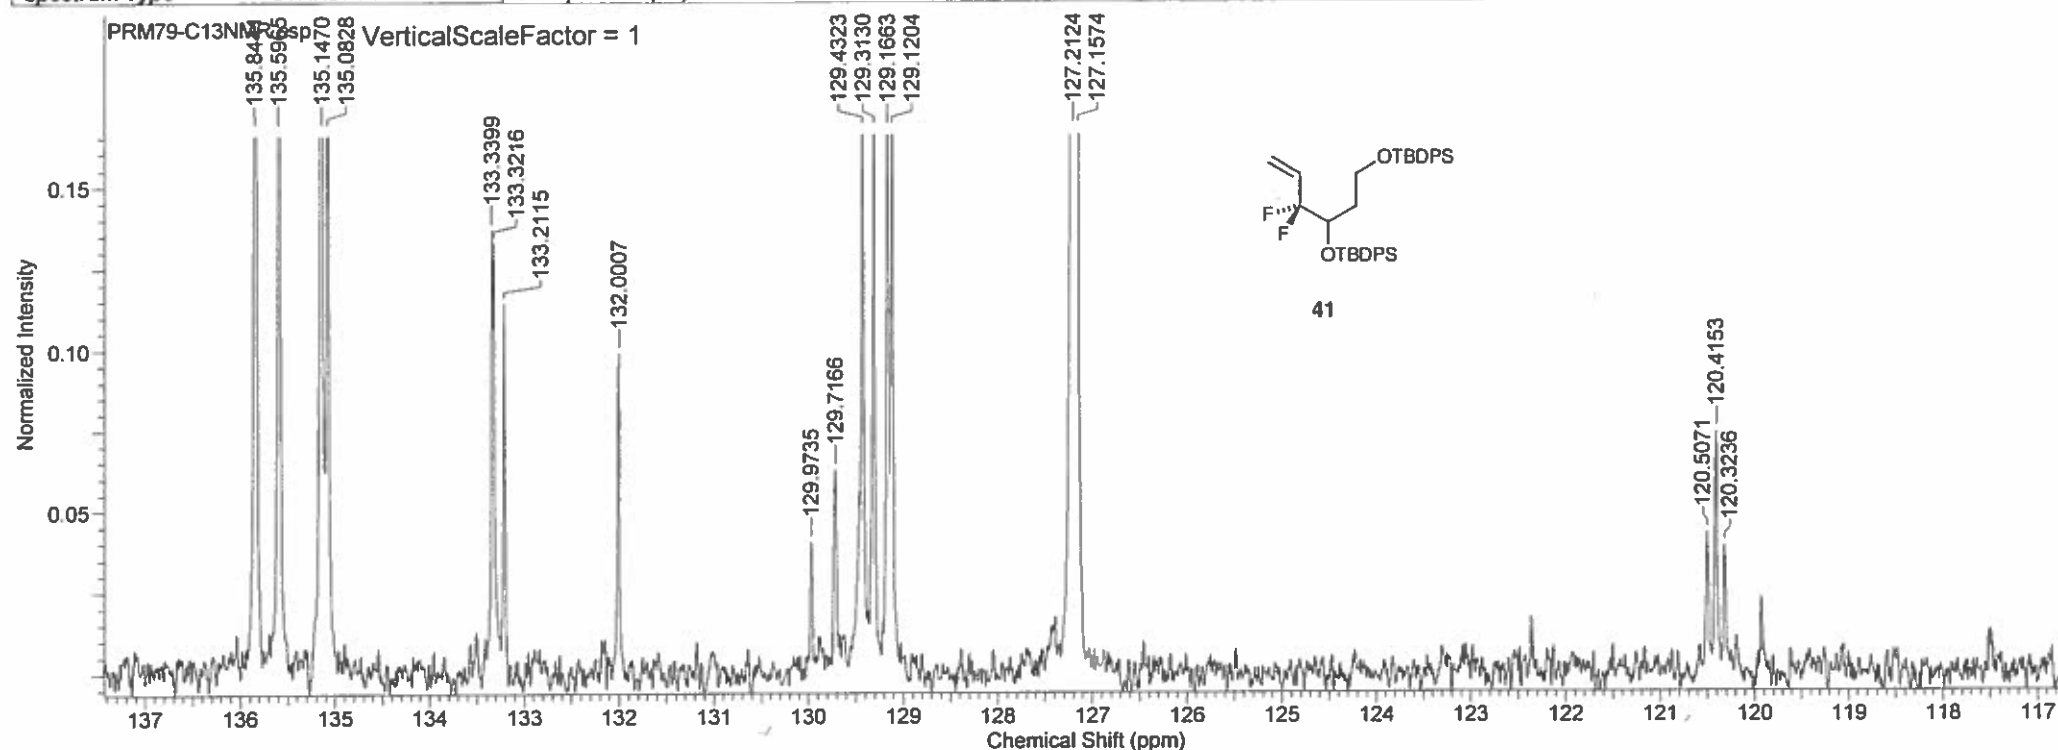

| No. | (ppm) | (Hz)   | Height | No. | (ppm)  | (Hz)    | Height | No. | (ppm)  | (Hz)    | Height | No. | (ppm)  | (Hz)    | Height |
|-----|-------|--------|--------|-----|--------|---------|--------|-----|--------|---------|--------|-----|--------|---------|--------|
| 1   | 18.68 | 1879.3 | 0.2102 | 7   | 71.51  | 7194.4  | 0.0453 | 13  | 120.51 | 12124.5 | 0.0424 | 19  | 129.43 | 13022.5 | 0.1720 |
| 2   | 19.28 | 1940.2 | 0.2114 | 8   | 71.77  | 7221.1  | 0.0348 | 14  | 127.16 | 12793.7 | 0.4051 | 20  | 129.72 | 13051.2 | 0.0625 |
| 3   | 26.38 | 2654.6 | 0.5291 | 9   | 71.83  | 7226.7  | 0.0355 | 15  | 127.21 | 12799.2 | 0.7568 | 21  | 129.97 | 13077.0 | 0.0402 |
| 4   | 26.58 | 2673.9 | 0.5033 | 10  | 72.10  | 7254.3  | 0.0405 | 16  | 129.12 | 12991.2 | 0.1982 | 22  | 132.00 | 13281.0 | 0.0988 |
| 5   | 35.13 | 3535.0 | 0.0761 | 11  | 120.32 | 12106.1 | 0.0384 | 17  | 129.17 | 12995.8 | 0.2313 | 23  | 133.21 | 13402.8 | 0.1141 |
| 6   | 59.89 | 6026.0 | 0.1114 | 12  | 120.42 | 12115.3 | 0.0735 | 18  | 129.31 | 13010.5 | 0.1777 | 24  | 133.32 | 13413.9 | 0.1326 |
|     |       |        |        |     |        |         |        |     |        |         |        | 25  | 133.34 | 13415.7 | 0.1369 |
|     |       |        |        |     |        |         |        |     |        |         |        | 26  | 135.08 | 13591.1 | 0.4275 |
|     |       |        |        |     |        |         |        |     |        |         |        | 27  | 135.15 | 13597.5 | 0.4308 |
|     |       |        |        |     |        |         |        |     |        |         |        | 28  | 135.60 | 13642.7 | 0.3973 |
|     |       |        |        |     |        |         |        |     |        |         |        | 29  | 135.84 | 13667.7 | 0.3377 |

EJT-PRM77 f5-11 86mg  
mF19CPD CDCl3 {e:\bruk400data\2013\Apr} ejt 56

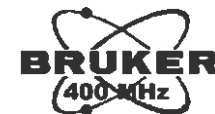

-101.45  
-102.10  
-103.37  
-104.03  
-109.22  
-109.26  
-109.88  
-109.91

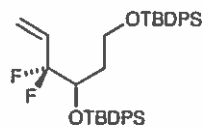

41

NAME 2013-04-24-ejt-56  
EXPNO 11  
PROCNO 1  
Date\_ 20130424  
Time 18.18  
INSTRUM AV400  
PROBHD 5 mm PABBO BB-  
PULPROG zgig  
TD 131072  
SOLVENT CDCl3  
NS 16  
DS 4  
SWH 89285.711 Hz  
FIDRES 0.681196 Hz  
AQ 0.7340532 sec  
RG 4100  
DN 5.600 usec  
DE 7.51 usec  
TE 293.3 K  
D1 1.00000000 sec  
D11 0.03000000 sec  
TD0 1

===== CHANNEL f1 =====  
NUC1 19F  
P1 10.70 usec  
PL1 -5.00 dB  
PL1W 27.00716019 W  
SFO1 376.4607164 MHz

===== CHANNEL f2 =====  
CPDPRG2 waltz16  
NUC2 1H  
PCPD2 90.00 usec  
PL2 -3.60 dB  
PL12 15.31 dB  
PL2W 17.83863831 W  
PL12W 0.22927761 W  
SFO2 400.1316005 MHz  
SI 262144  
SF 376.4983660 MHz  
WDW EM  
SSB 0  
LB 0.30 Hz  
GB 0  
PC 2.00

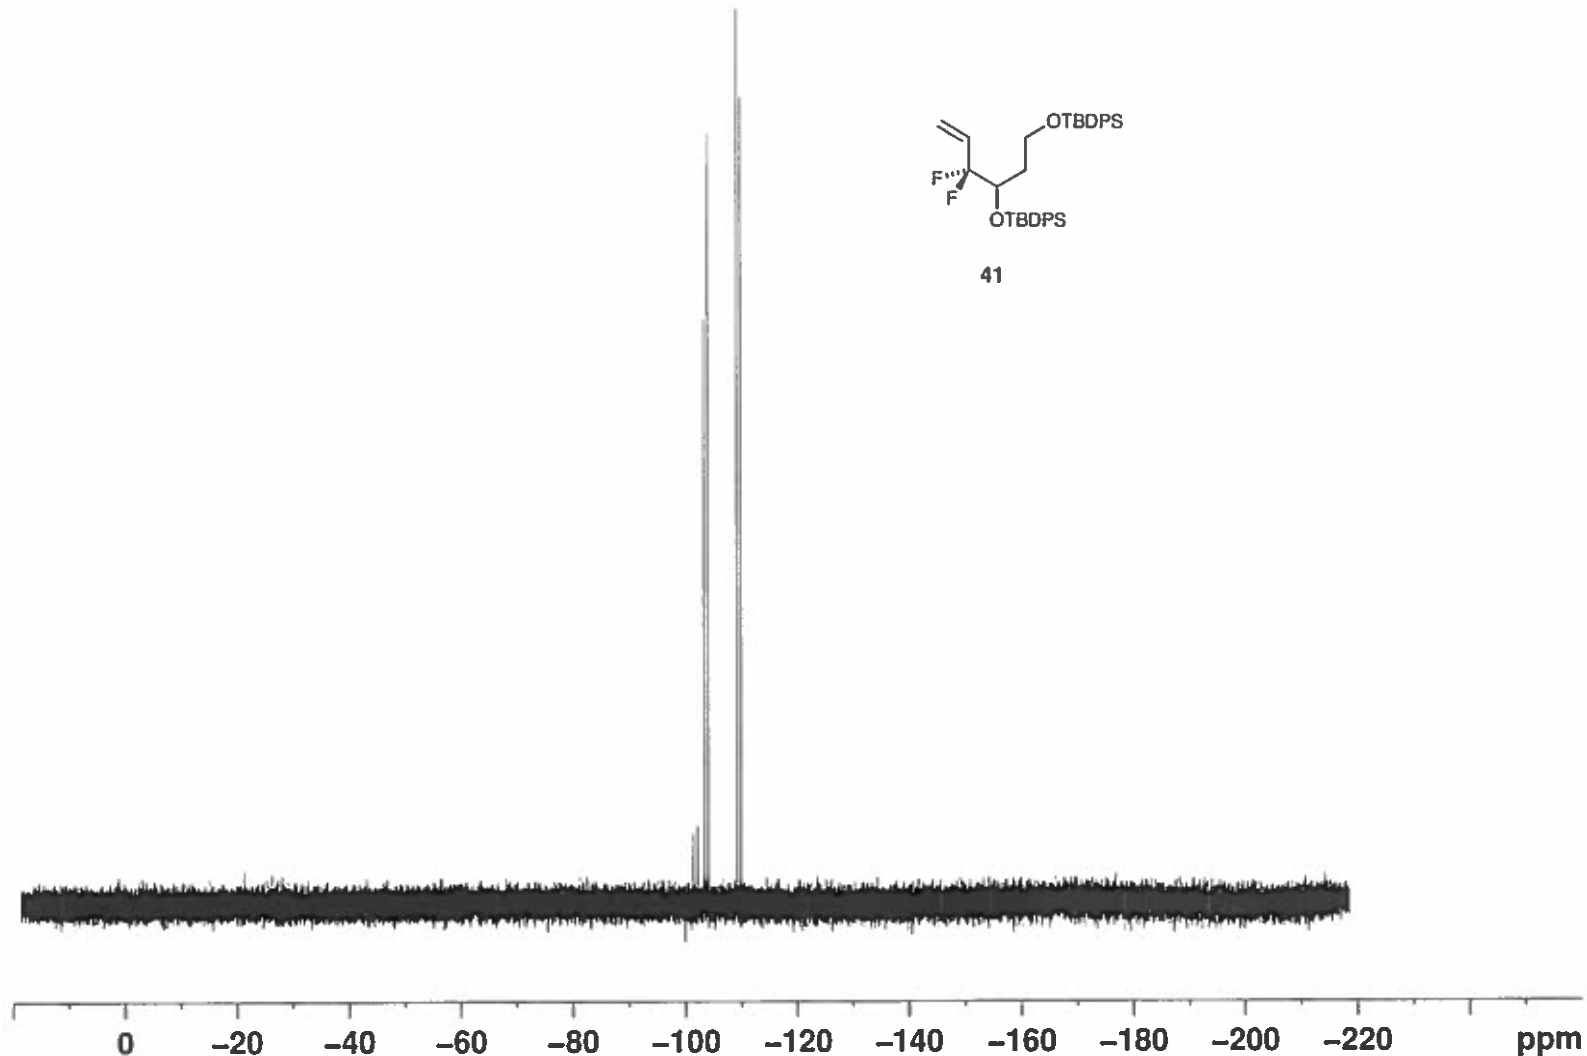

EJT-PRM89 f10-24 20mg  
mPROTON CDCl3 {e:\bruk400data\2013\May} ejt 11

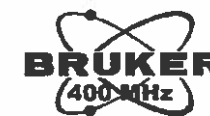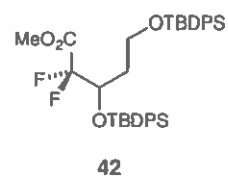

NAME 2013-05-29-ejt-11  
EXPNO 10  
PROCNO 1  
Date\_ 20130529  
Time 12.38  
INSTRUM AV400  
PROBHD 5 mm PABBO BB-  
PULPROG zg30b  
TD 65536  
SOLVENT CDCl3  
NS 16  
DS 0  
SWH 8264.463 Hz  
FIDRES 0.126106 Hz  
AQ 3.9649780 sec  
RG 144  
DW 60.500 usec  
DE 9.40 usec  
TE 294.4 K  
D1 1.00000000 sec  
TD0 1

===== CHANNEL f1 =====  
NUC1 1H  
P1 10.00 usec  
PL1 -3.60 dB  
PL1W 17.83863831 W  
SFO1 400.1324710 MHz  
SI 32768  
SF 400.1300464 MHz  
WDW EM  
SSB 0  
LB 0.30 Hz  
GB 0  
PC 1.00

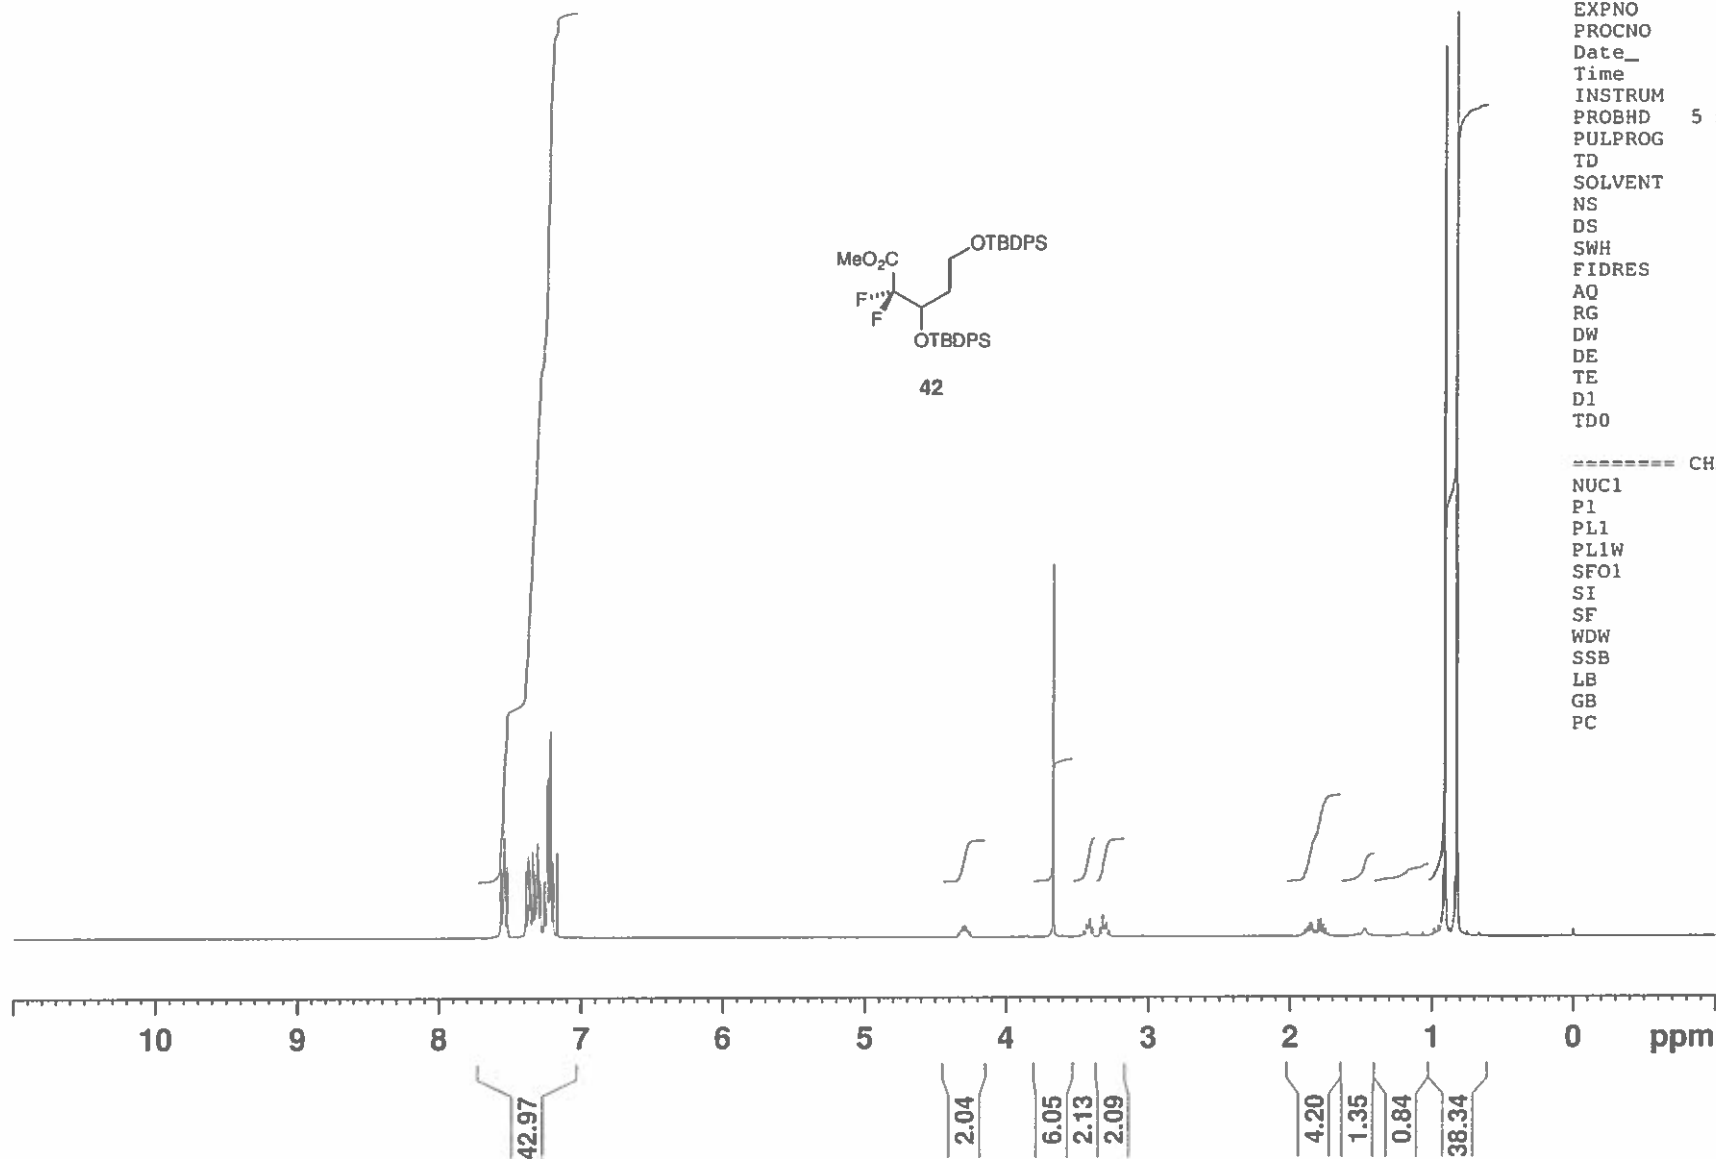

|                        |                                                                                                                          |                   |                                                                                       |                        |              |
|------------------------|--------------------------------------------------------------------------------------------------------------------------|-------------------|---------------------------------------------------------------------------------------|------------------------|--------------|
| Acquisition Time (sec) | 1.1010                                                                                                                   | Comment           | EJT-PRM80 methyl ester mCARBONnight CDCl3 /opt/oldbruk500data.11vii11/2013/Jun ejt 26 |                        |              |
| Date                   | 07 Jun 2013 03:50:40                                                                                                     | Date Stamp        | 07 Jun 2013 03:50:40                                                                  |                        |              |
| File Name              | \\ss7a.ds.man.ac.uk\vol5\VOL3\USERS\SNMRDATA\BRUK500DATA\BRUK500DATA\2013JUN\DATA\EJTNMR\2013-06-06-EJT-26\11\DATA\11\1R |                   |                                                                                       |                        |              |
| Frequency (MHz)        | 125.76                                                                                                                   | Nucleus           | 13C                                                                                   | Number of Transients   | 3072         |
| Original Points Count  | 32768                                                                                                                    | Owner             | vnmr1                                                                                 | Points Count           | 32768        |
| Receiver Gain          | 512.00                                                                                                                   | SW(cyclical) (Hz) | 29761.90                                                                              | Solvent                | CHLOROFORM-d |
| Spectrum Type          | STANDARD                                                                                                                 | Sweep Width (Hz)  | 29761.00                                                                              | Temperature (degree C) | 25.128       |
|                        |                                                                                                                          |                   |                                                                                       | Origin                 | spect        |
|                        |                                                                                                                          |                   |                                                                                       | Pulse Sequence         | zgpg30       |
|                        |                                                                                                                          |                   |                                                                                       | Spectrum Offset (Hz)   | 12569.3496   |

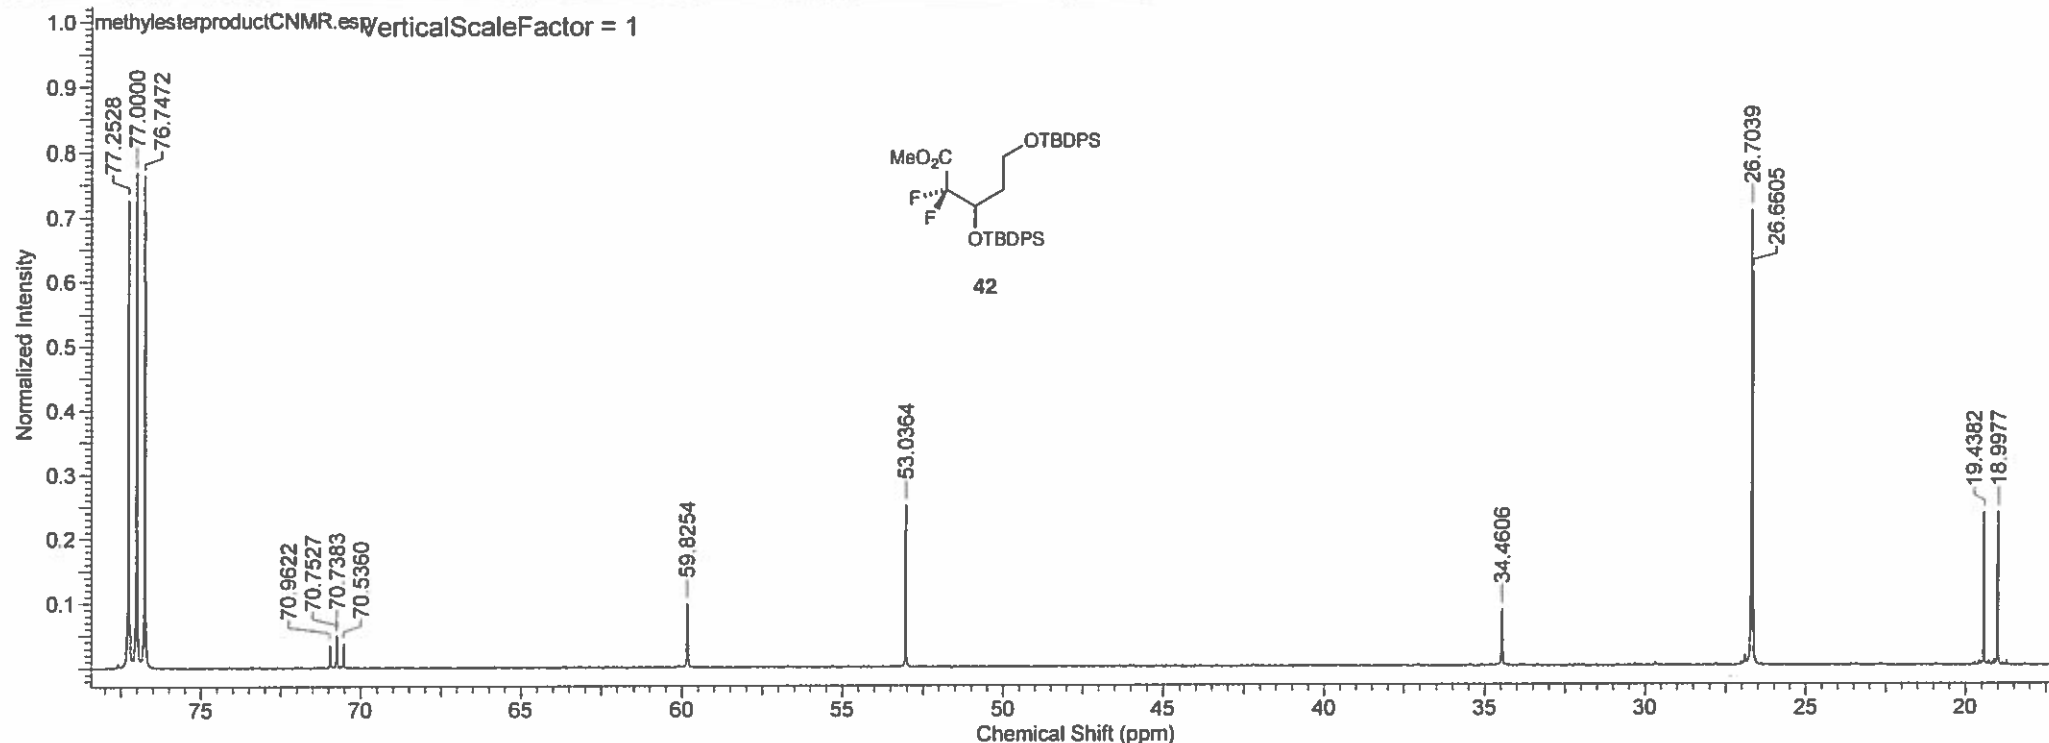

| No. | (ppm) | (Hz)   | Height |
|-----|-------|--------|--------|-----|-------|--------|--------|-----|-------|--------|--------|-----|-------|--------|--------|
| 1   | 19.00 | 2389.1 | 0.2368 | 4   | 26.70 | 3358.2 | 0.7079 | 7   | 59.83 | 7523.5 | 0.0992 | 10  | 70.75 | 8897.7 | 0.0487 |
| 2   | 19.44 | 2444.5 | 0.2365 | 5   | 34.46 | 4333.7 | 0.0876 | 8   | 70.54 | 8870.5 | 0.0373 | 11  | 70.96 | 8924.0 | 0.0351 |
| 3   | 26.66 | 3352.8 | 0.6122 | 6   | 53.04 | 6669.7 | 0.2506 | 9   | 70.74 | 8895.9 | 0.0510 | 12  | 76.75 | 9651.6 | 0.7640 |
|     |       |        |        |     |       |        |        |     |       |        |        | 13  | 77.00 | 9683.3 | 0.7680 |
|     |       |        |        |     |       |        |        |     |       |        |        | 14  | 77.25 | 9715.1 | 0.7269 |

|                        |                                                                                                                           |                   |                                                                                       |                        |              |                      |            |
|------------------------|---------------------------------------------------------------------------------------------------------------------------|-------------------|---------------------------------------------------------------------------------------|------------------------|--------------|----------------------|------------|
| Acquisition Time (sec) | 1.1010                                                                                                                    | Comment           | EJT-PRM80 methyl ester mCARBONnight CDCI3 /opt/oldbruk500data.11vii11/2013/Jun ejt 26 |                        |              |                      |            |
| Date                   | 07 Jun 2013 03:50:40                                                                                                      | Date Stamp        | 07 Jun 2013 03:50:40                                                                  |                        |              |                      |            |
| File Name              | \\ss7a.ds.man.ac.uk\vol5\VOL3\USERS\SNMRDATA\BRUK500DATA\BRUK500DATA\2013JUN\DATA\EJT\NMR\2013-06-06-EJT-26\11\PDATA\111R |                   |                                                                                       |                        |              |                      |            |
| Frequency (MHz)        | 125.76                                                                                                                    | Nucleus           | 13C                                                                                   | Number of Transients   | 3072         | Origin               | spect      |
| Original Points Count  | 32768                                                                                                                     | Owner             | vnmr1                                                                                 | Points Count           | 32768        | Pulse Sequence       | zgpg30     |
| Receiver Gain          | 512.00                                                                                                                    | SW(cyclical) (Hz) | 29761.90                                                                              | Solvent                | CHLOROFORM-d | Spectrum Offset (Hz) | 12569.3496 |
| Spectrum Type          | STANDARD                                                                                                                  | Sweep Width (Hz)  | 29761.00                                                                              | Temperature (degree C) | 25.128       |                      |            |

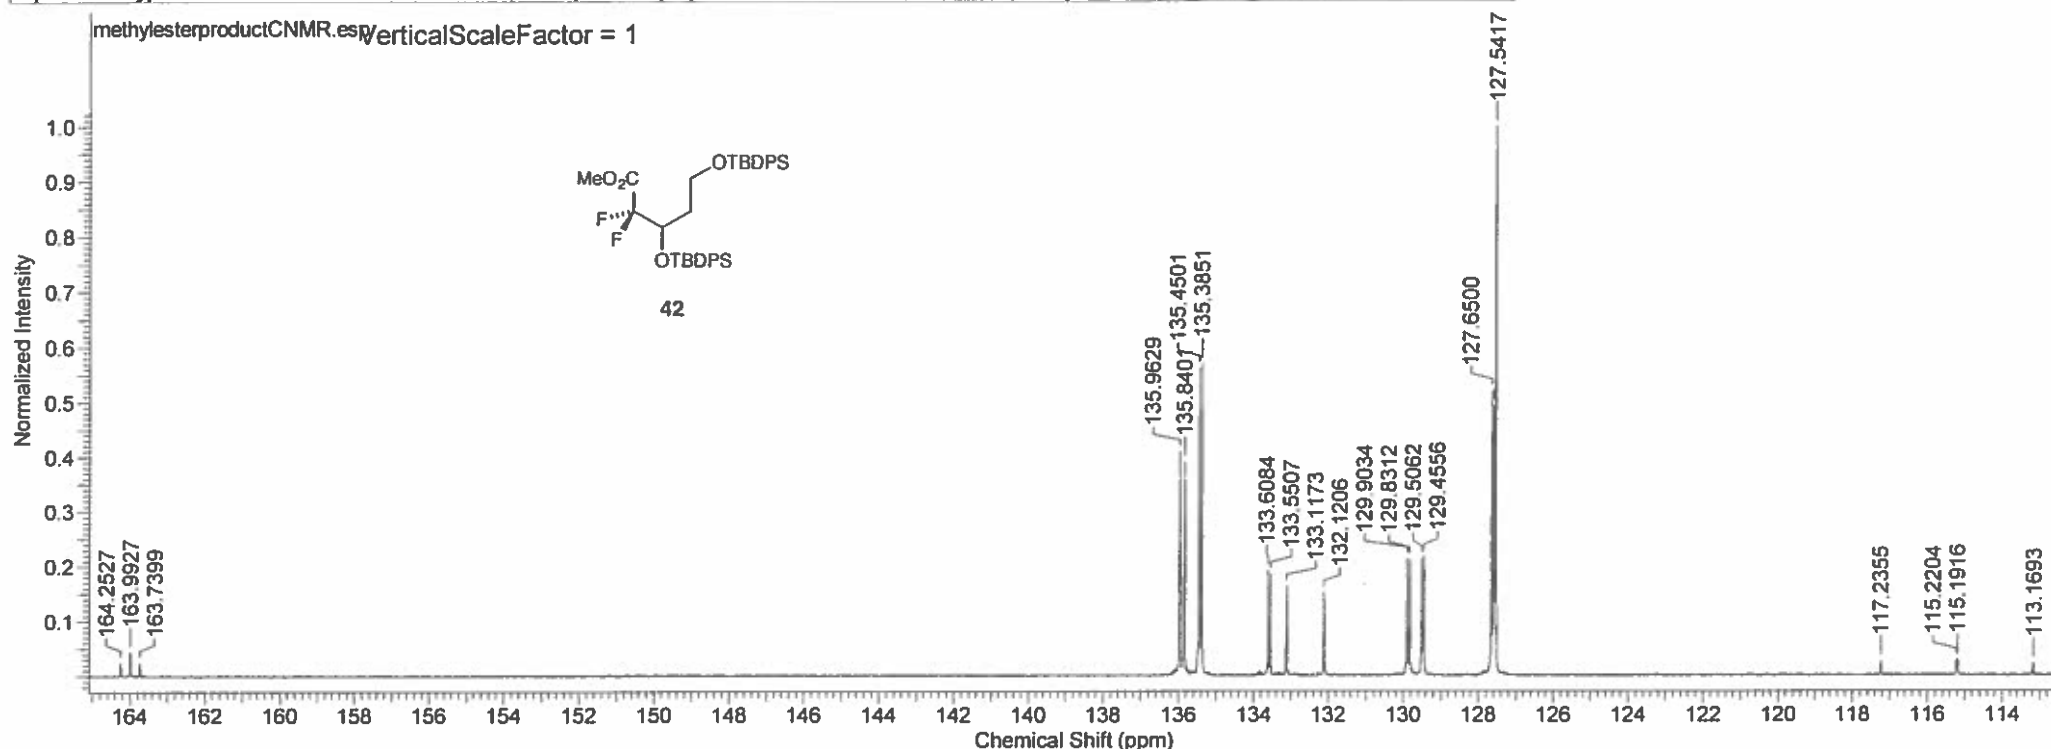

| No. | (ppm) | (Hz)   | Height | No. | (ppm)  | (Hz)    | Height | No. | (ppm)  | (Hz)    | Height | No. | (ppm)  | (Hz)    | Height |
|-----|-------|--------|--------|-----|--------|---------|--------|-----|--------|---------|--------|-----|--------|---------|--------|
| 1   | 19.00 | 2389.1 | 0.2368 | 9   | 70.74  | 8895.9  | 0.0510 | 17  | 115.22 | 14489.9 | 0.0265 | 25  | 129.90 | 16336.4 | 0.2136 |
| 2   | 19.44 | 2444.5 | 0.2365 | 10  | 70.75  | 8897.7  | 0.0487 | 18  | 117.24 | 14743.3 | 0.0254 | 26  | 132.12 | 16615.2 | 0.1516 |
| 3   | 26.66 | 3352.8 | 0.6122 | 11  | 70.96  | 8924.0  | 0.0351 | 19  | 127.54 | 16039.4 | 1.0000 | 27  | 133.12 | 16740.5 | 0.1625 |
| 4   | 26.70 | 3358.2 | 0.7079 | 12  | 76.75  | 9651.6  | 0.7640 | 20  | 127.59 | 16045.7 | 0.4926 | 28  | 133.55 | 16795.0 | 0.1850 |
| 5   | 34.46 | 4333.7 | 0.0876 | 13  | 77.00  | 9683.3  | 0.7680 | 21  | 127.65 | 16053.0 | 0.5199 | 29  | 133.61 | 16802.3 | 0.1924 |
| 6   | 53.04 | 6669.7 | 0.2506 | 14  | 77.25  | 9715.1  | 0.7269 | 22  | 129.46 | 16280.1 | 0.2176 | 30  | 135.39 | 17025.7 | 0.5682 |
| 7   | 59.83 | 7523.5 | 0.0992 | 15  | 113.17 | 14231.9 | 0.0225 | 23  | 129.51 | 16286.4 | 0.2148 | 31  | 135.45 | 17033.9 | 0.5619 |
| 8   | 70.54 | 8870.5 | 0.0373 | 16  | 115.19 | 14486.2 | 0.0292 | 24  | 129.83 | 16327.3 | 0.2114 | 32  | 135.84 | 17083.0 | 0.3899 |

**EJT-PRM89 f10-24 20mg**

mF19CPD CDCl3 {e:\bruk400data\2013\May} ejt 11

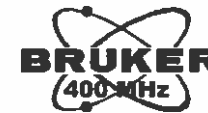

$\begin{array}{r} \diagup \\ \diagdown \end{array} \begin{array}{r} -111.40 \\ -112.09 \\ -117.61 \\ -118.29 \end{array}$

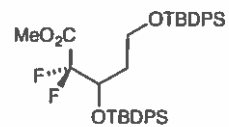

42

```

NAME          2013-05-29-ejt-11
EXPNO         11
PROCNO        1
Date_         20130529
Time          12.39
INSTRUM       AV400
PROBHD        5 mm PABBO BB-
PULPROG       zg1g
TD            131072
SOLVENT       CDC13
NS            16
DS            4
SWH            89285.711 Hz
FIDRES        0.681196 Hz
AQ            0.7340532 sec
RG            4100
DW            5.600 usec
DE            7.51 usec
TE            294.6 K
D1            1.00000000 sec
D11           0.03000000 sec
TD0           1

```

```
===== CHANNEL f1 =====
NUC1                19F
P1                  10.70 usec
PL1                 -5.00 dB
PL1W                27.00716019 W
SFO1                376.4607164 MHz
```

```

***** CHANIEL f2 *****
CPDPRG2          waltz16
NUC2              1H
PCPD2            90.00 usec
PL2              -3.60 dB
PL12             15.31 dB
PL2W             17.83863831 W
PL12W            0.22927761 W
SFO2             400.1316005 MHz
SI               262144
SF               376.4983660 MHz
WDW              EM
SSB              0
LB               0.30 Hz
GB               0
PC               2.00

```

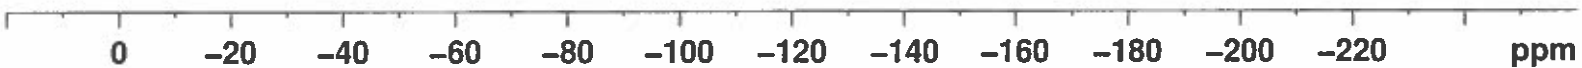

EJT-PRM92 prod fracs 40mg  
mPROTON CDCl3 {e:\bruk400data\2013\Jun} ejt 14

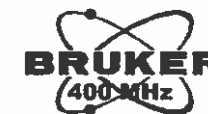

NAME 2013-06-13-ejt-14  
EXPNO 10  
PROCNO 1  
Date\_ 20130613  
Time 16.51  
INSTRUM AV400  
PROBHD 5 mm PABBO BB-  
PULPROG zg30b  
TD 65536  
SOLVENT CDCl3  
NS 16  
DS 0  
SWH 8264.463 Hz  
FIDRES 0.126106 Hz  
AQ 3.9649780 sec  
RG 101  
DW 60.500 usec  
DE 9.40 usec  
TE 294.3 K  
D1 1.00000000 sec  
TD0 1

----- CHANNEL f1 -----  
NUC1 1H  
P1 10.00 usec  
PL1 -3.60 dB  
PL1W 17.83863831 W  
SFO1 400.1324710 MHz  
SI 32768  
SF 400.1300465 MHz  
WDW EM  
SSB 0  
LB 0.30 Hz  
GB 0  
PC 1.00

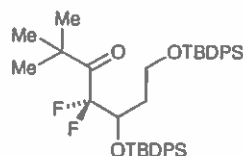

43

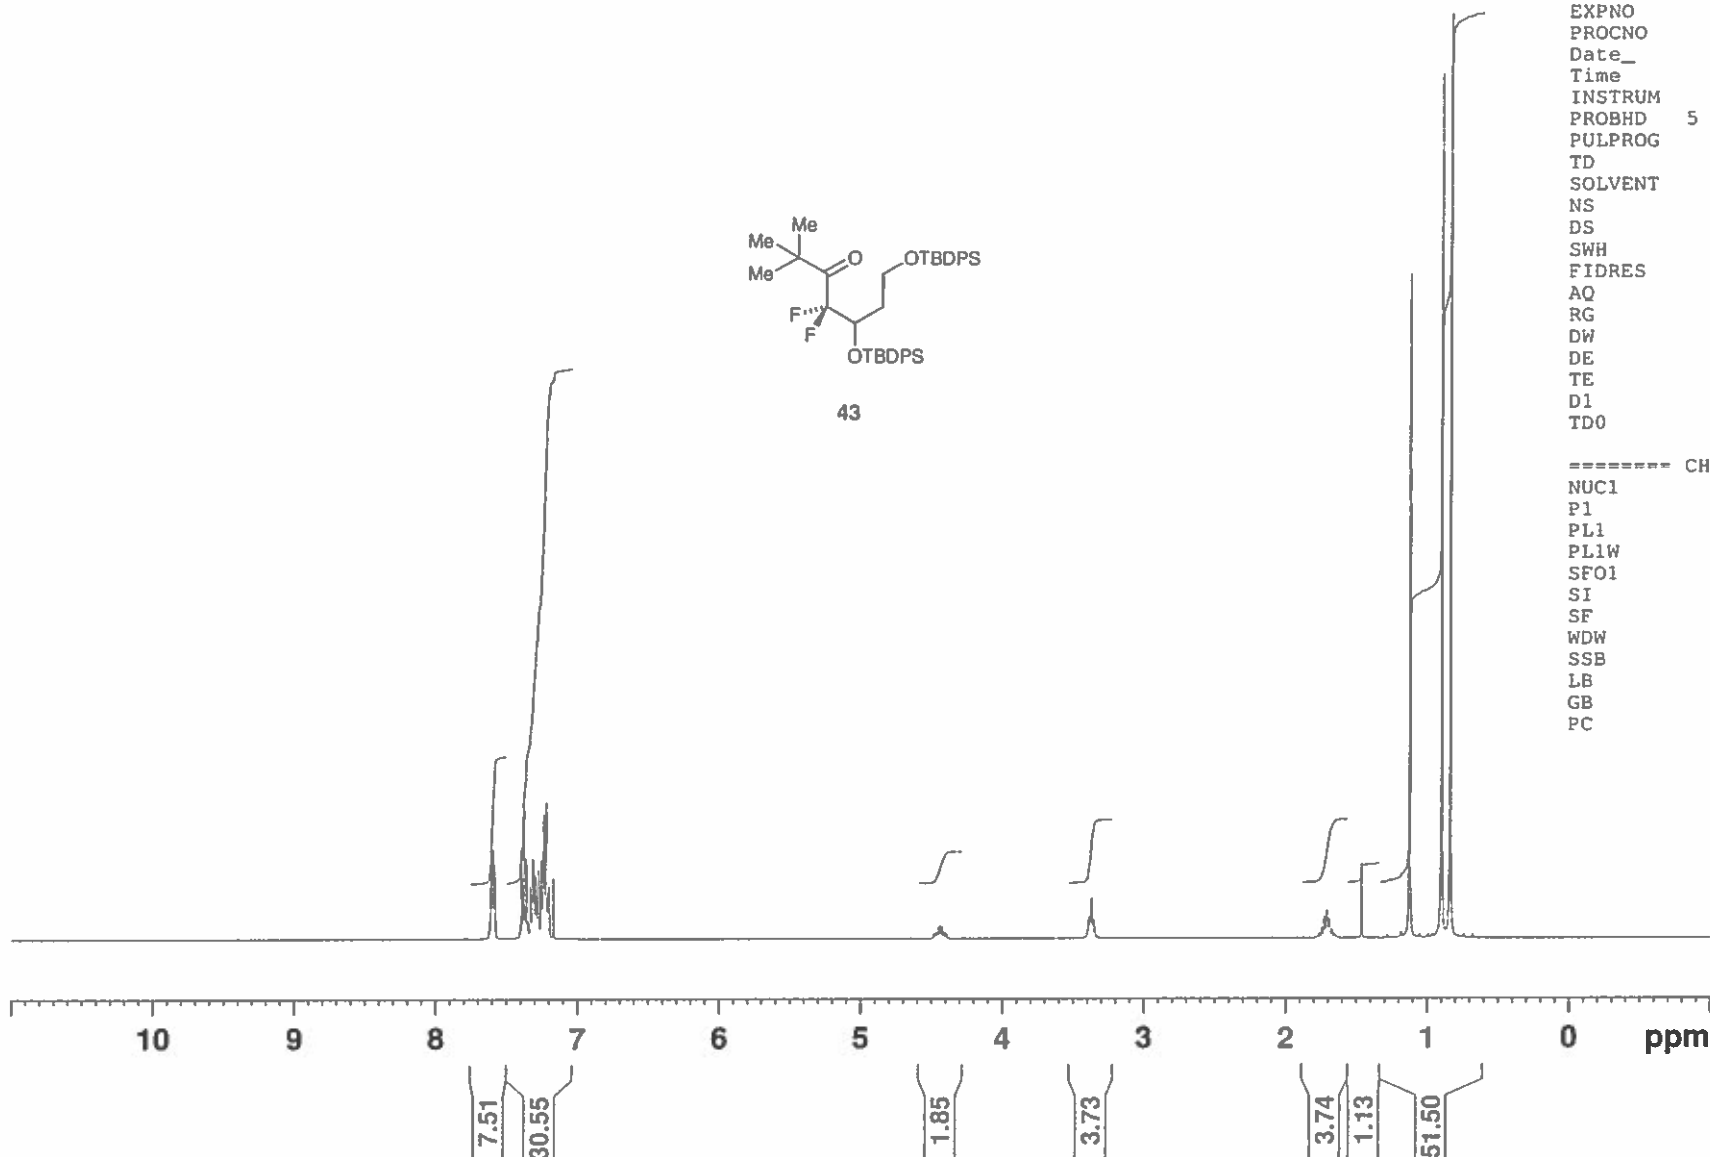



|                        |                                                                                                                        |                   |                                                                              |                        |              |                      |            |
|------------------------|------------------------------------------------------------------------------------------------------------------------|-------------------|------------------------------------------------------------------------------|------------------------|--------------|----------------------|------------|
| Acquisition Time (sec) | 1.3631                                                                                                                 | Comment           | EJT-PRM92 prod data mCARBON_A CDCI3 (E:\bruk400service_data\2013\Aug) ejt 12 |                        |              |                      |            |
| Date                   | 16 Aug 2013 13:01:04                                                                                                   | Date Stamp        | 16 Aug 2013 13:01:04                                                         |                        |              |                      |            |
| File Name              | \\ss7a.ds.man.ac.uk\vol5\VOL3\USERS\SNMRDATA\BRUK400SERVICE_DATA\2013\AUG\DATA\EJT\NMR\2013-08-16-EJT-12\10\PDATA\1\1R |                   |                                                                              |                        |              |                      |            |
| Frequency (MHz)        | 100.64                                                                                                                 | Nucleus           | 13C                                                                          | Number of Transients   | 256          | Origin               | AV400_S    |
| Original Points Count  | 32768                                                                                                                  | Owner             | Administrator                                                                | Points Count           | 32768        | Pulse Sequence       | zgpg30     |
| Receiver Gain          | 2050.00                                                                                                                | SW(cyclical) (Hz) | 24038.46                                                                     | Solvent                | CHLOROFORM-d | Spectrum Offset (Hz) | 10052.9766 |
| Spectrum Type          | STANDARD                                                                                                               | Sweep Width (Hz)  | 24037.73                                                                     | Temperature (degree C) | 25.100       |                      |            |

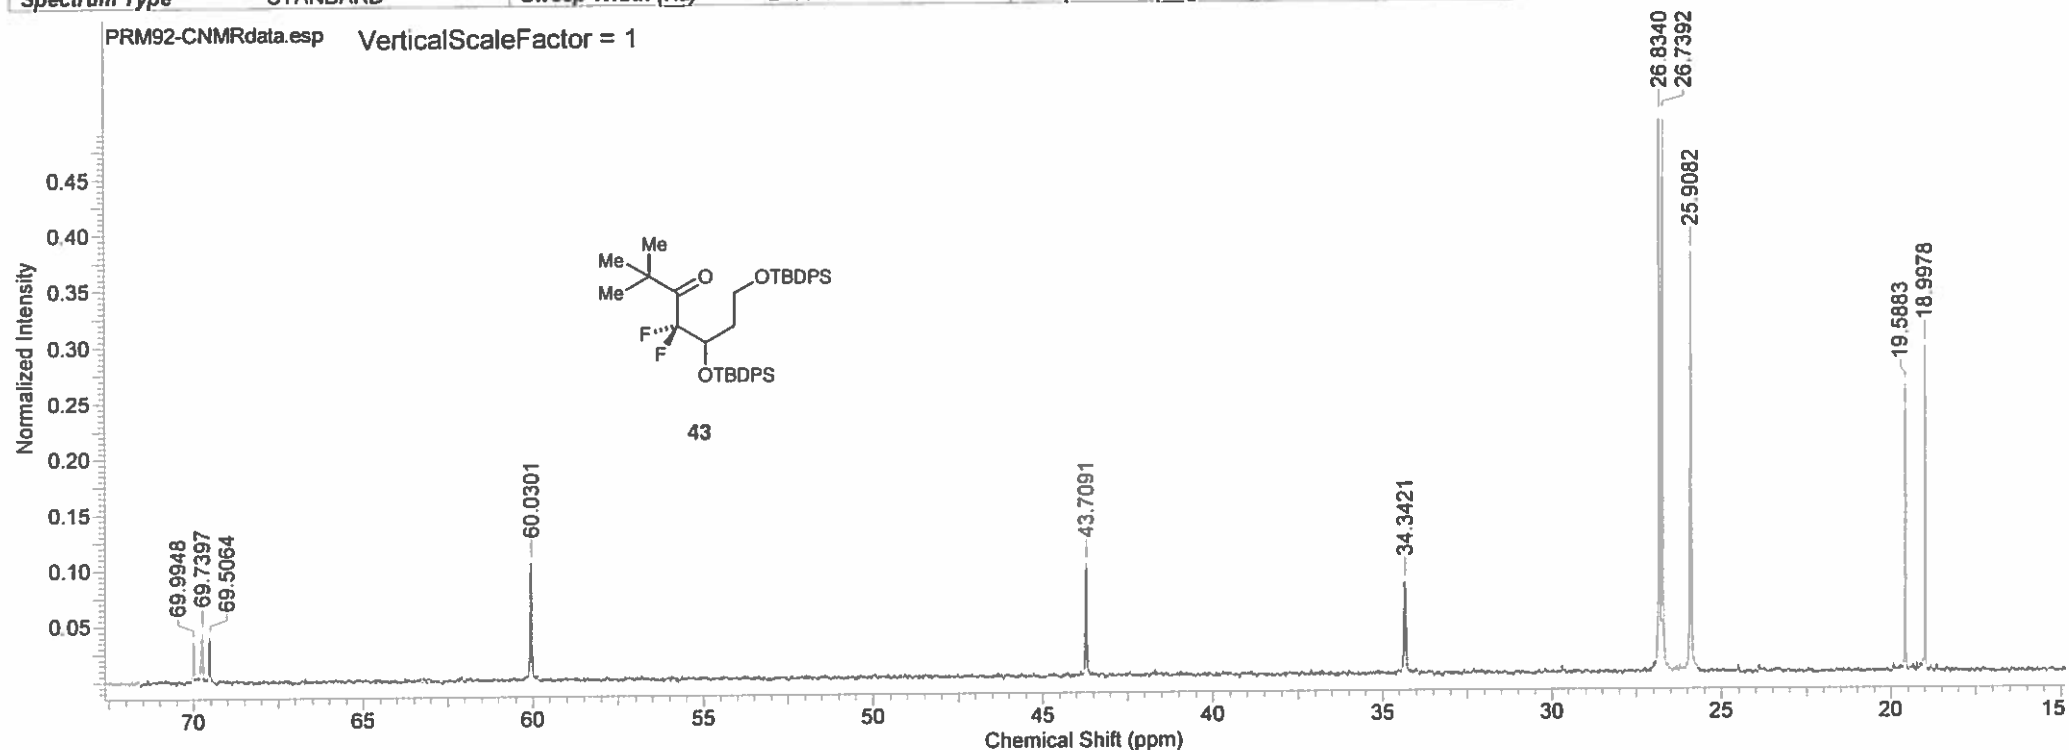

| No. | (ppm) | (Hz)   | Height |
|-----|-------|--------|--------|
| 1   | 19.00 | 1911.9 | 0.2909 |
| 2   | 19.59 | 1971.3 | 0.2561 |
| 3   | 25.91 | 2607.3 | 0.3759 |
| 4   | 26.74 | 2691.0 | 0.6812 |
| 5   | 26.83 | 2700.5 | 0.7331 |
| 6   | 34.34 | 3456.1 | 0.0819 |
| 7   | 43.71 | 4398.8 | 0.1006 |

| No. | (ppm)  | (Hz)    | Height |
|-----|--------|---------|--------|
| 8   | 60.03  | 6041.3  | 0.1051 |
| 9   | 69.51  | 6995.0  | 0.0402 |
| 10  | 69.74  | 7018.5  | 0.0451 |
| 11  | 69.99  | 7044.1  | 0.0362 |
| 12  | 115.58 | 11632.0 | 0.0139 |
| 13  | 118.16 | 11891.0 | 0.0151 |
| 14  | 120.77 | 12154.4 | 0.0177 |

| No. | (ppm)  | (Hz)    | Height |
|-----|--------|---------|--------|
| 15  | 127.54 | 12835.1 | 1.0000 |
| 16  | 127.60 | 12841.7 | 0.4956 |
| 17  | 129.43 | 13025.9 | 0.2381 |
| 18  | 129.48 | 13031.0 | 0.2207 |
| 19  | 129.67 | 13049.3 | 0.2017 |
| 20  | 129.79 | 13061.8 | 0.2198 |
| 21  | 132.22 | 13306.8 | 0.1308 |

| No. | (ppm)  | (Hz)    | Height |
|-----|--------|---------|--------|
| 22  | 133.54 | 13438.9 | 0.1312 |
| 23  | 133.65 | 13449.9 | 0.1402 |
| 24  | 133.68 | 13453.6 | 0.1522 |
| 25  | 135.04 | 13590.0 | 0.0101 |
| 26  | 135.17 | 13603.2 | 0.0124 |
| 27  | 135.41 | 13627.4 | 0.5391 |
| 28  | 135.48 | 13634.8 | 0.4682 |

| No. | (ppm)  | (Hz)    | Height |
|-----|--------|---------|--------|
| 29  | 135.54 | 13640.6 | 0.0254 |
| 30  | 135.87 | 13673.6 | 0.4506 |
| 31  | 136.04 | 13690.5 | 0.3669 |
| 32  | 204.29 | 20559.2 | 0.0217 |
| 33  | 204.57 | 20587.0 | 0.0263 |
| 34  | 204.84 | 20614.2 | 0.0223 |

|                        |                                                                                                                         |                   |                                                                              |                        |              |                      |            |
|------------------------|-------------------------------------------------------------------------------------------------------------------------|-------------------|------------------------------------------------------------------------------|------------------------|--------------|----------------------|------------|
| Acquisition Time (sec) | 1.3631                                                                                                                  | Comment           | EJT-PRM92 prod data mCARBON_A CDCl3 (E:\bruk400service_data\2013\Aug) ejt 12 |                        |              |                      |            |
| Date                   | 16 Aug 2013 13:01:04                                                                                                    | Date Stamp        | 16 Aug 2013 13:01:04                                                         |                        |              |                      |            |
| File Name              | \\ss7a.ds.man.ac.uk\vol5\VOL3\USERS\SNMR\DATA\BRUK400SERVICE_DATA\2013\AUG\DATA\EJT\NMR\2013-08-16-EJT-12\10\PDATA\1\1R |                   |                                                                              |                        |              |                      |            |
| Frequency (MHz)        | 100.64                                                                                                                  | Nucleus           | 13C                                                                          | Number of Transients   | 256          | Origin               | AV400_S    |
| Original Points Count  | 32768                                                                                                                   | Owner             | Administrator                                                                | Points Count           | 32768        | Pulse Sequence       | zgpg30     |
| Receiver Gain          | 2050.00                                                                                                                 | SW(cyclical) (Hz) | 24038.46                                                                     | Solvent                | CHLOROFORM-d | Spectrum Offset (Hz) | 10052.9766 |
| Spectrum Type          | STANDARD                                                                                                                | Sweep Width (Hz)  | 24037.73                                                                     | Temperature (degree C) | 25.100       |                      |            |

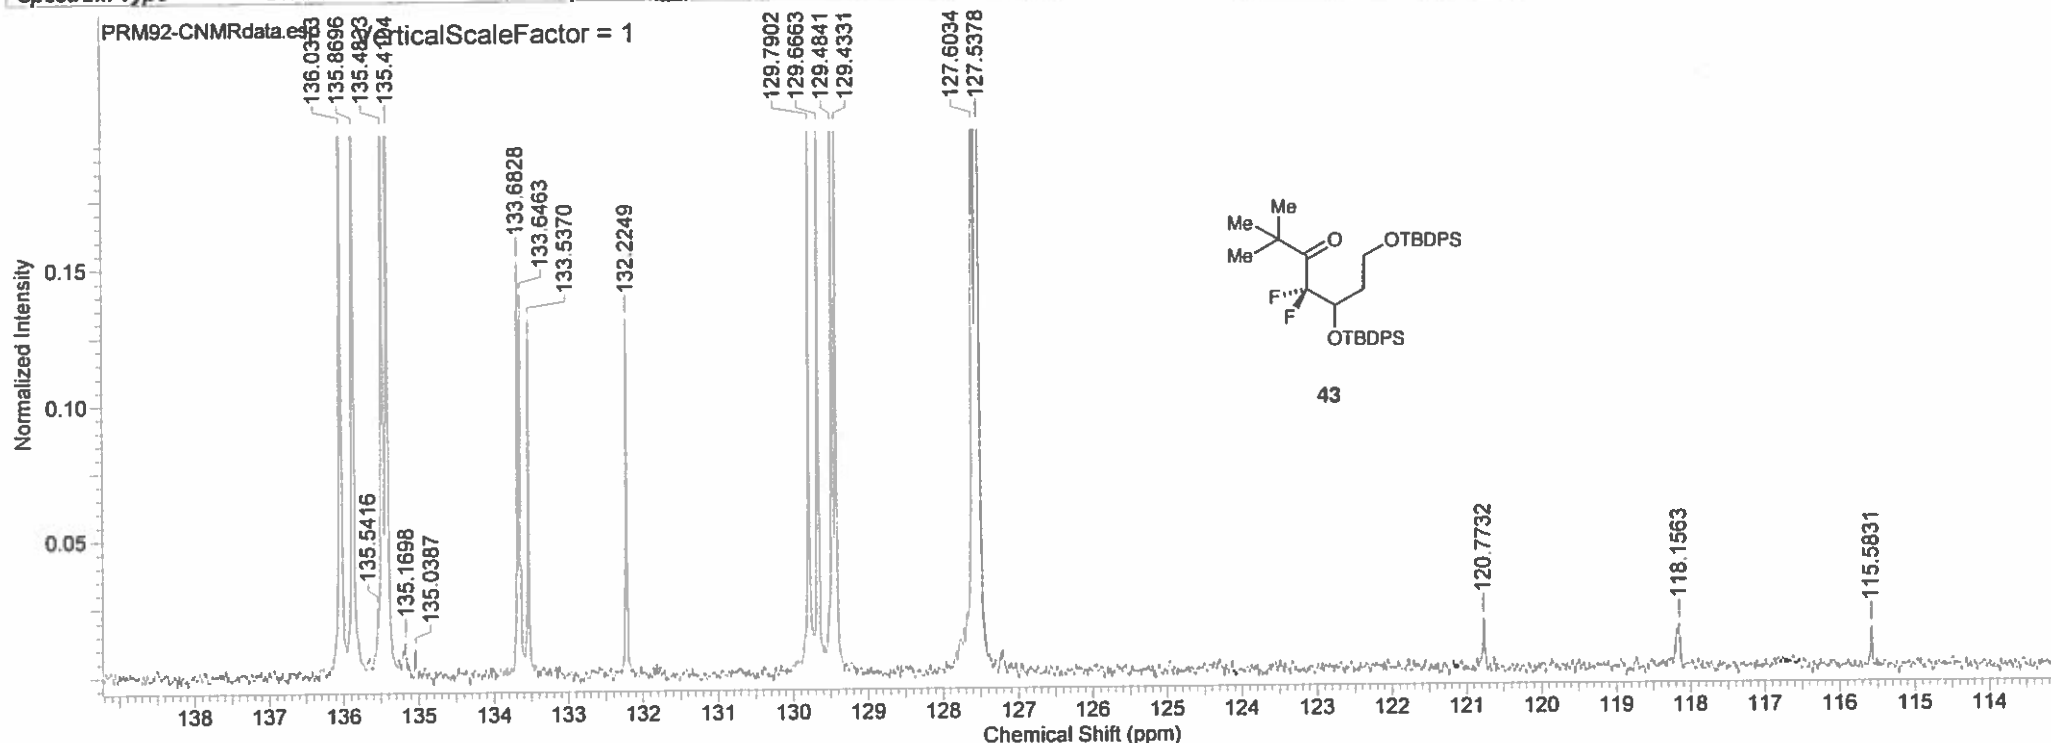

| No. | (ppm)  | (Hz)    | Height |
|-----|--------|---------|--------|-----|--------|---------|--------|-----|--------|---------|--------|-----|--------|---------|--------|
| 1   | 115.58 | 11632.0 | 0.0139 | 6   | 129.43 | 13025.9 | 0.2381 | 11  | 133.54 | 13438.9 | 0.1312 | 16  | 135.41 | 13627.4 | 0.5391 |
| 2   | 118.16 | 11891.0 | 0.0151 | 7   | 129.48 | 13031.0 | 0.2207 | 12  | 133.65 | 13449.9 | 0.1402 | 17  | 135.48 | 13634.8 | 0.4682 |
| 3   | 120.77 | 12154.4 | 0.0177 | 8   | 129.67 | 13049.3 | 0.2017 | 13  | 133.68 | 13453.6 | 0.1522 | 18  | 135.54 | 13640.6 | 0.0254 |
| 4   | 127.54 | 12835.1 | 1.0000 | 9   | 129.79 | 13061.8 | 0.2198 | 14  | 135.04 | 13590.0 | 0.0101 | 19  | 135.87 | 13673.6 | 0.4506 |
| 5   | 127.60 | 12841.7 | 0.4956 | 10  | 132.22 | 13306.8 | 0.1308 | 15  | 135.17 | 13603.2 | 0.0124 | 20  | 136.04 | 13690.5 | 0.3669 |
|     |        |         |        |     |        |         |        |     |        |         |        | 21  | 204.29 | 20559.2 | 0.0217 |
|     |        |         |        |     |        |         |        |     |        |         |        | 22  | 204.57 | 20587.0 | 0.0263 |
|     |        |         |        |     |        |         |        |     |        |         |        | 23  | 204.84 | 20614.2 | 0.0223 |

|                        |                                                                                                                        |                   |                                                                              |                        |              |
|------------------------|------------------------------------------------------------------------------------------------------------------------|-------------------|------------------------------------------------------------------------------|------------------------|--------------|
| Acquisition Time (sec) | 1.3631                                                                                                                 | Comment           | EJT-PRM92 prod data mCARBON A CDCl3 (E:\bruk400service_data\2013\Aug) ejt 12 |                        |              |
| Date                   | 16 Aug 2013 13:01:04                                                                                                   | Date Stamp        | 16 Aug 2013 13:01:04                                                         |                        |              |
| File Name              | \\ss7a.ds.man.ac.uk\vol5\VOL3\USERS\SNMRDATA\BRUK400SERVICE DATA\2013\AUG\DATA\EJT\NMR\2013-08-16-EJT-12\10\PDATA\111R |                   |                                                                              |                        |              |
| Frequency (MHz)        | 100.64                                                                                                                 | Nucleus           | 13C                                                                          | Number of Transients   | 256          |
| Original Points Count  | 32768                                                                                                                  | Owner             | Administrator                                                                | Points Count           | 32768        |
| Receiver Gain          | 2050.00                                                                                                                | SW(cyclical) (Hz) | 24038.46                                                                     | Solvent                | CHLOROFORM-d |
| Spectrum Type          | STANDARD                                                                                                               | Sweep Width (Hz)  | 24037.73                                                                     | Temperature (degree C) | 25.100       |
|                        |                                                                                                                        |                   |                                                                              | Origin                 | AV400 S      |
|                        |                                                                                                                        |                   |                                                                              | Pulse Sequence         | zgpg30       |
|                        |                                                                                                                        |                   |                                                                              | Spectrum Offset (Hz)   | 10052.9766   |

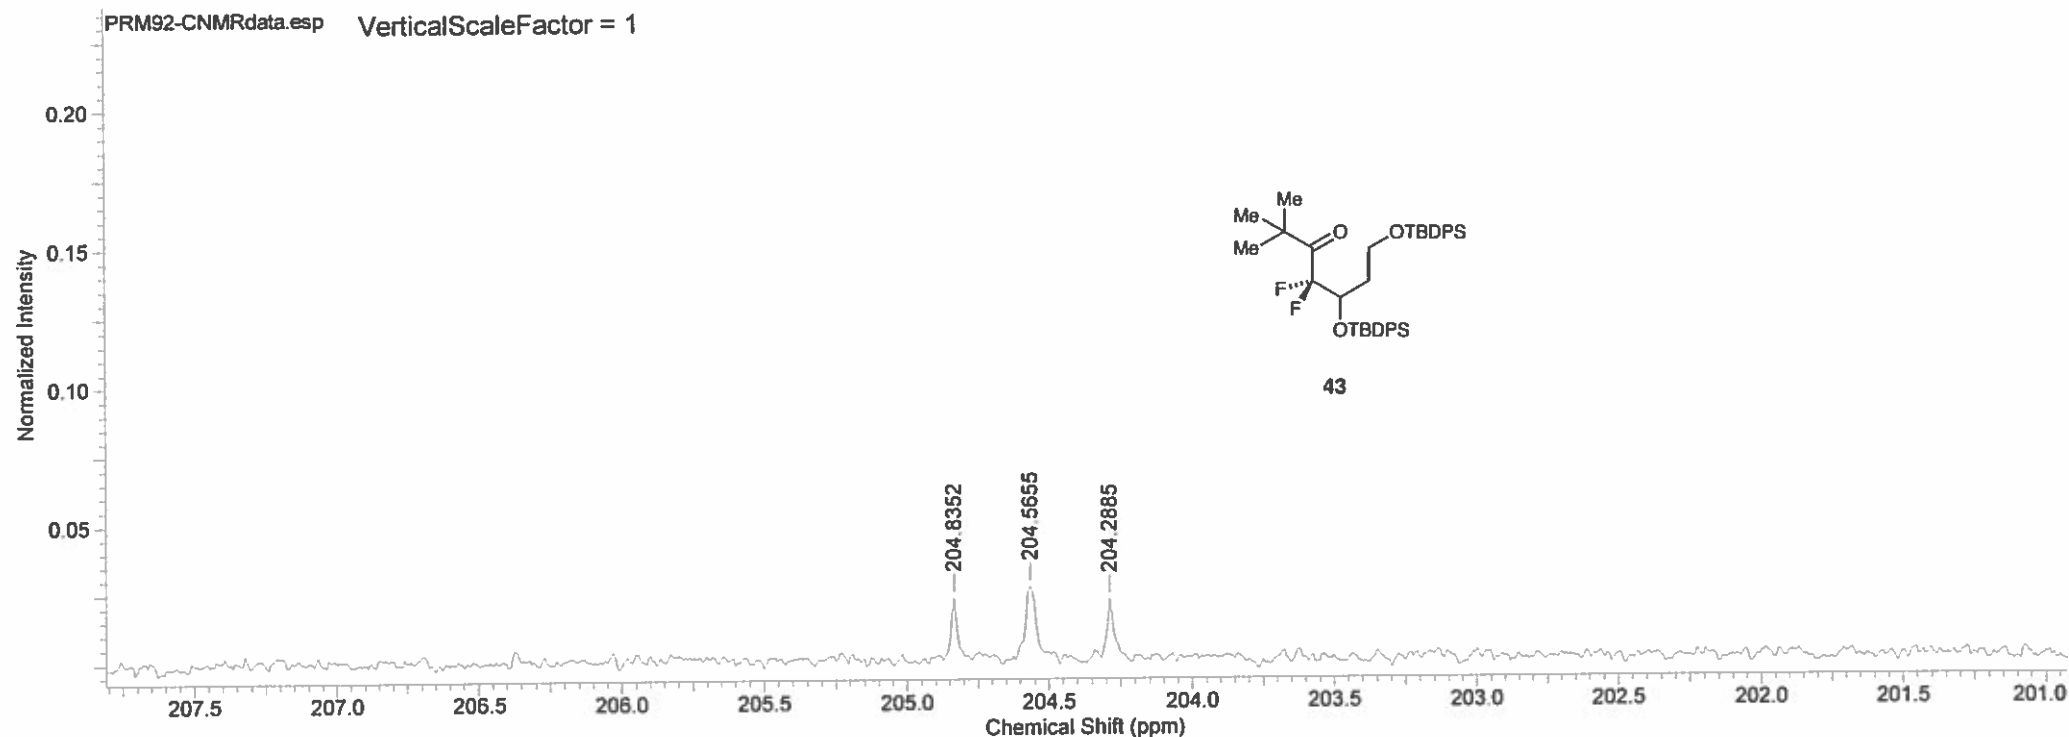

| No. | (ppm)  | (Hz)    | Height |
|-----|--------|---------|--------|
| 1   | 204.29 | 20559.2 | 0.0217 |
| 2   | 204.57 | 20587.0 | 0.0263 |
| 3   | 204.84 | 20614.2 | 0.0223 |

EJT-PRM92 prod frags 40mg  
mF19CPD CDCl3 {e:\bruk400data\2013\Jun} ejt 14

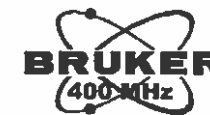

-109.59  
-110.33  
-111.31  
-112.05

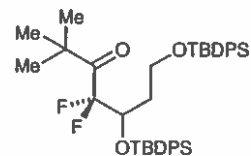

43

NAME 2013-06-13-ejt-14  
EXPNO 11  
PROCNO 1  
Date\_ 20130613  
Time 16.53  
INSTRUM AV400  
PROBHD 5 mm PABBO BB-  
PULPROG zgig  
TD 131072  
SOLVENT CDCl3  
NS 16  
DS 4  
SWH 89285.711 Hz  
FIDRES 0.681196 Hz  
AQ 0.7340532 sec  
RG 4100  
DW 5.600 usec  
DE 7.51 usec  
TE 294.5 K  
D1 1.00000000 sec  
D11 0.03000000 sec  
TD0 1

===== CHANNEL f1 =====  
NUC1 19F  
P1 10.70 usec  
PL1 -5.00 dB  
PL1W 27.00716019 W  
SFO1 376.4607164 MHz

===== CHANNEL f2 =====  
CPDPRG2 waltz16  
NUC2 1H  
PCPD2 90.00 usec  
PL2 -3.60 dB  
PL12 15.31 dB  
PL2W 17.83863831 W  
PL12W 0.22927761 W  
SFO2 400.1316005 MHz  
SI 262144  
SF 376.4983660 MHz  
WDW EM  
SSB 0  
LB 0.30 Hz  
GB 0  
PC 2.00

0 -20 -40 -60 -80 -100 -120 -140 -160 -180 -200 -220 ppm

|                        |                                                                                                                                     |                   |                                                                                            |                        |            |                      |           |
|------------------------|-------------------------------------------------------------------------------------------------------------------------------------|-------------------|--------------------------------------------------------------------------------------------|------------------------|------------|----------------------|-----------|
| Acquisition Time (sec) | 3.9846                                                                                                                              | Comment           | EJT-PRM93 Product data C-13 mPROTON C6D6 (E:\bruk400service_data\2013\Sep) Administrator 4 |                        |            |                      |           |
| Date                   | 16 Sep 2013 13:05:20                                                                                                                | Date Stamp        | 16 Sep 2013 13:05:20                                                                       |                        |            |                      |           |
| File Name              | \\ss7a.ds.man.ac.uk\vol5\vol3\users\snmrdata\bruk400service_data\2013\Sep\data\Administrator\nmr\2013-09-16-Administrator-4\110\fid |                   |                                                                                            |                        |            |                      |           |
| Frequency (MHz)        | 400.23                                                                                                                              | Nucleus           | 1H                                                                                         | Number of Transients   | 16         | Origin               | AV400_S   |
| Original Points Count  | 32768                                                                                                                               | Owner             | Administrator                                                                              | Points Count           | 32768      | Pulse Sequence       | zg30      |
| Receiver Gain          | 181.00                                                                                                                              | SW(cyclical) (Hz) | 8223.68                                                                                    | Solvent                | BENZENE-d6 | Spectrum Offset (Hz) | 2424.5730 |
| Spectrum Type          | STANDARD                                                                                                                            | Sweep Width (Hz)  | 8223.43                                                                                    | Temperature (degree C) | 21.000     |                      |           |

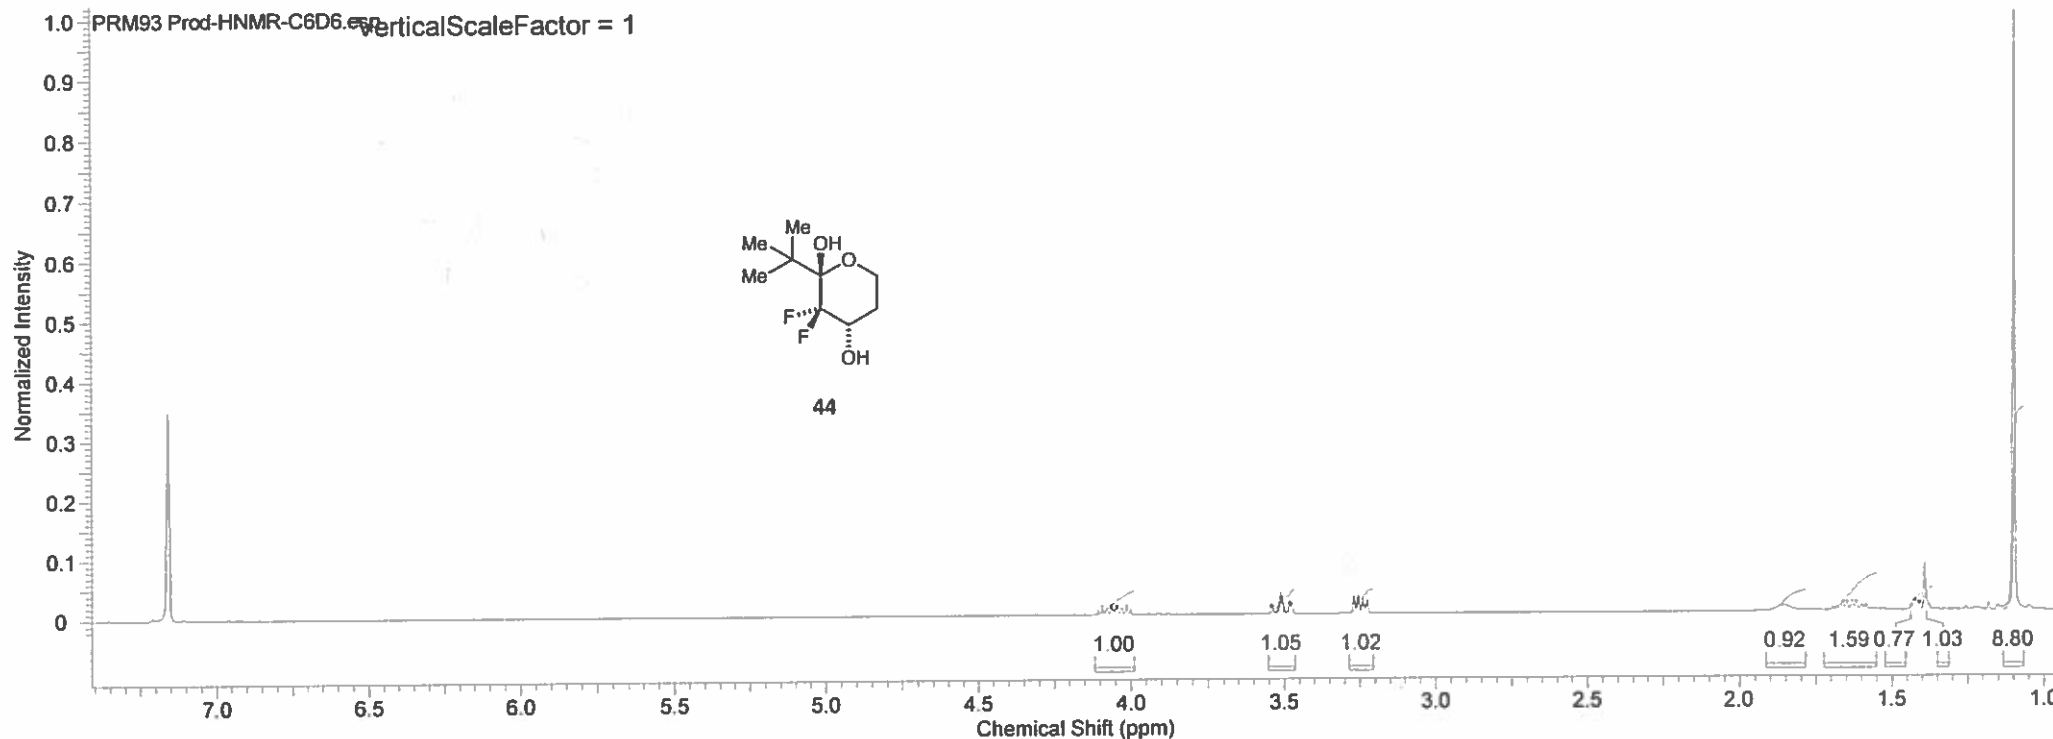

| No. | (ppm)         | Value      | Absolute Value | Non-Negative Value |
|-----|---------------|------------|----------------|--------------------|
| 1   | 6663 .. 1.138 | 7.9730225  | 3.25690757e+10 | 8.79730225         |
| 2   | 3673 .. 1.401 | 1.02738047 | 3.80353306e+9  | 1.02738047         |
| 3   | 4051 .. 1.470 | 0.77102357 | 2.85445734e+9  | 0.77102357         |
| 4   | 5520 .. 1.721 | 1.59436548 | 5.90260582e+9  | 1.59436548         |
| 5   | 7838 .. 1.910 | 0.91760439 | 3.39712384e+9  | 0.91760439         |
| 6   | 2054 .. 3.281 | 1.02023995 | 3.77709773e+9  | 1.02023995         |
| 7   | 4649 .. 3.551 | 1.04753137 | 3.87813530e+9  | 1.04753137         |
| 8   | 9897 .. 4.110 | 0.99798036 | 3.69468902e+9  | 0.99798036         |

|                        |                                                                                                                                    |                   |                                                                                            |                        |            |                      |            |
|------------------------|------------------------------------------------------------------------------------------------------------------------------------|-------------------|--------------------------------------------------------------------------------------------|------------------------|------------|----------------------|------------|
| Acquisition Time (sec) | 1.3631                                                                                                                             | Comment           | EJT-PRM93 Product data C-13 mCARBON C6D6 (E:\bruk400service_data\2013\Sep) Administrator 4 |                        |            |                      |            |
| Date                   | 16 Sep 2013 13:56:32                                                                                                               | Date Stamp        | 16 Sep 2013 13:56:32                                                                       |                        |            |                      |            |
| File Name              | \\ss7a.ds.man.ac.uk\vol5\vol3\users\snmrdata\bruk400service_data\2013\Sep\data\Administrator\nmr\2013-09-16-Administrator-4\13\fid |                   |                                                                                            |                        |            |                      |            |
| Frequency (MHz)        | 100.64                                                                                                                             | Nucleus           | 13C                                                                                        | Number of Transients   | 12000      | Origin               | AV400_S    |
| Original Points Count  | 32768                                                                                                                              | Owner             | Administrator                                                                              | Points Count           | 32768      | Pulse Sequence       | zgpg30     |
| Receiver Gain          | 2050.00                                                                                                                            | SW(cyclical) (Hz) | 24038.46                                                                                   | Solvent                | BENZENE-d6 | Spectrum Offset (Hz) | 10119.6650 |
| Spectrum Type          | STANDARD                                                                                                                           | Sweep Width (Hz)  | 24037.73                                                                                   | Temperature (degree C) | 21.000     |                      |            |

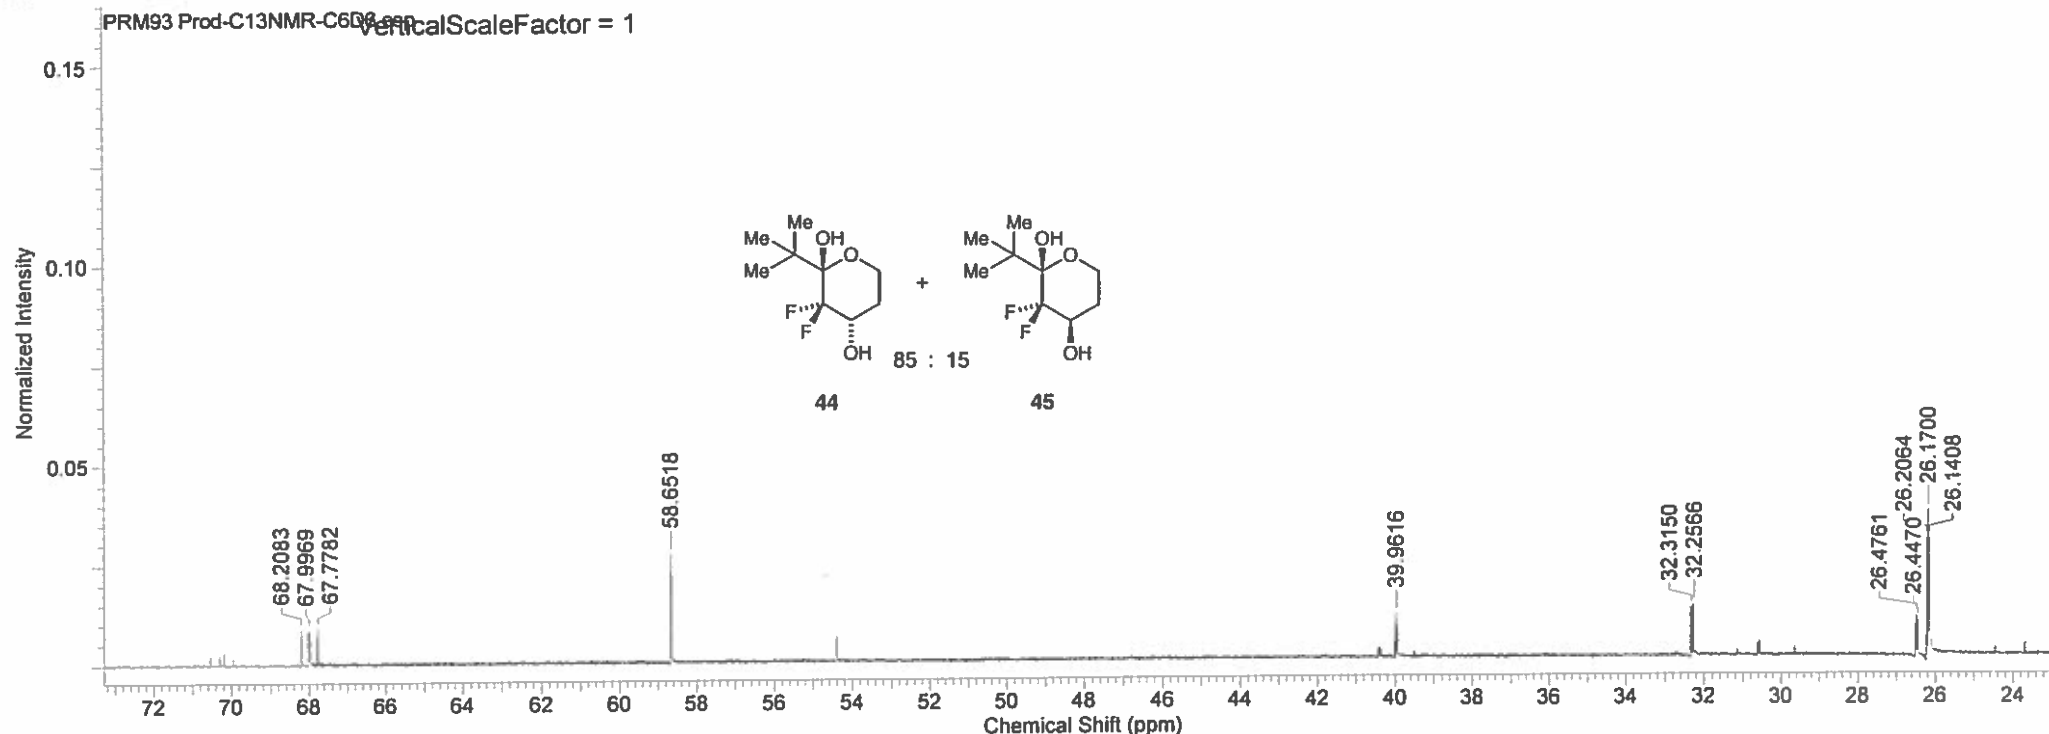

| No. | (ppm) | (Hz)   | Height |
|-----|-------|--------|--------|-----|-------|--------|--------|-----|-------|--------|--------|-----|-------|--------|--------|
| 1   | 26.14 | 2630.8 | 0.0291 | 4   | 26.45 | 2661.6 | 0.0085 | 7   | 32.31 | 3252.1 | 0.0121 | 10  | 67.78 | 6821.1 | 0.0091 |
| 2   | 26.17 | 2633.7 | 0.0362 | 5   | 26.48 | 2664.5 | 0.0096 | 8   | 39.96 | 4021.7 | 0.0109 | 11  | 68.00 | 6843.1 | 0.0086 |
| 3   | 26.21 | 2637.4 | 0.0290 | 6   | 32.26 | 3246.2 | 0.0127 | 9   | 58.65 | 5902.6 | 0.0272 | 12  | 68.21 | 6864.3 | 0.0088 |

|                        |                                                                                                                                    |                   |                                                                                            |                        |            |                      |            |
|------------------------|------------------------------------------------------------------------------------------------------------------------------------|-------------------|--------------------------------------------------------------------------------------------|------------------------|------------|----------------------|------------|
| Acquisition Time (sec) | 1.3631                                                                                                                             | Comment           | EJT-PRM93 Product data C-13 mCARBON C6D6 (E:\bruk400service_data\2013\Sep) Administrator 4 |                        |            |                      |            |
| Date                   | 16 Sep 2013 13:56:32                                                                                                               | Date Stamp        | 16 Sep 2013 13:56:32                                                                       |                        |            |                      |            |
| File Name              | \\ss7a.ds.man.ac.uk\vol5\vol3\users\snmrdata\bruk400service_data\2013\Sep\data\Administrator\nmr\2013-09-16-Administrator-4\13\fid |                   |                                                                                            |                        |            |                      |            |
| Frequency (MHz)        | 100.64                                                                                                                             | Nucleus           | 13C                                                                                        | Number of Transients   | 12000      | Origin               | AV400_S    |
| Original Points Count  | 32768                                                                                                                              | Owner             | Administrator                                                                              | Points Count           | 32768      | Pulse Sequence       | zgpg30     |
| Receiver Gain          | 2050.00                                                                                                                            | SW(cyclical) (Hz) | 24038.46                                                                                   | Solvent                | BENZENE-d6 | Spectrum Offset (Hz) | 10119.6650 |
| Spectrum Type          | STANDARD                                                                                                                           | Sweep Width (Hz)  | 24037.73                                                                                   | Temperature (degree C) | 21.000     |                      |            |

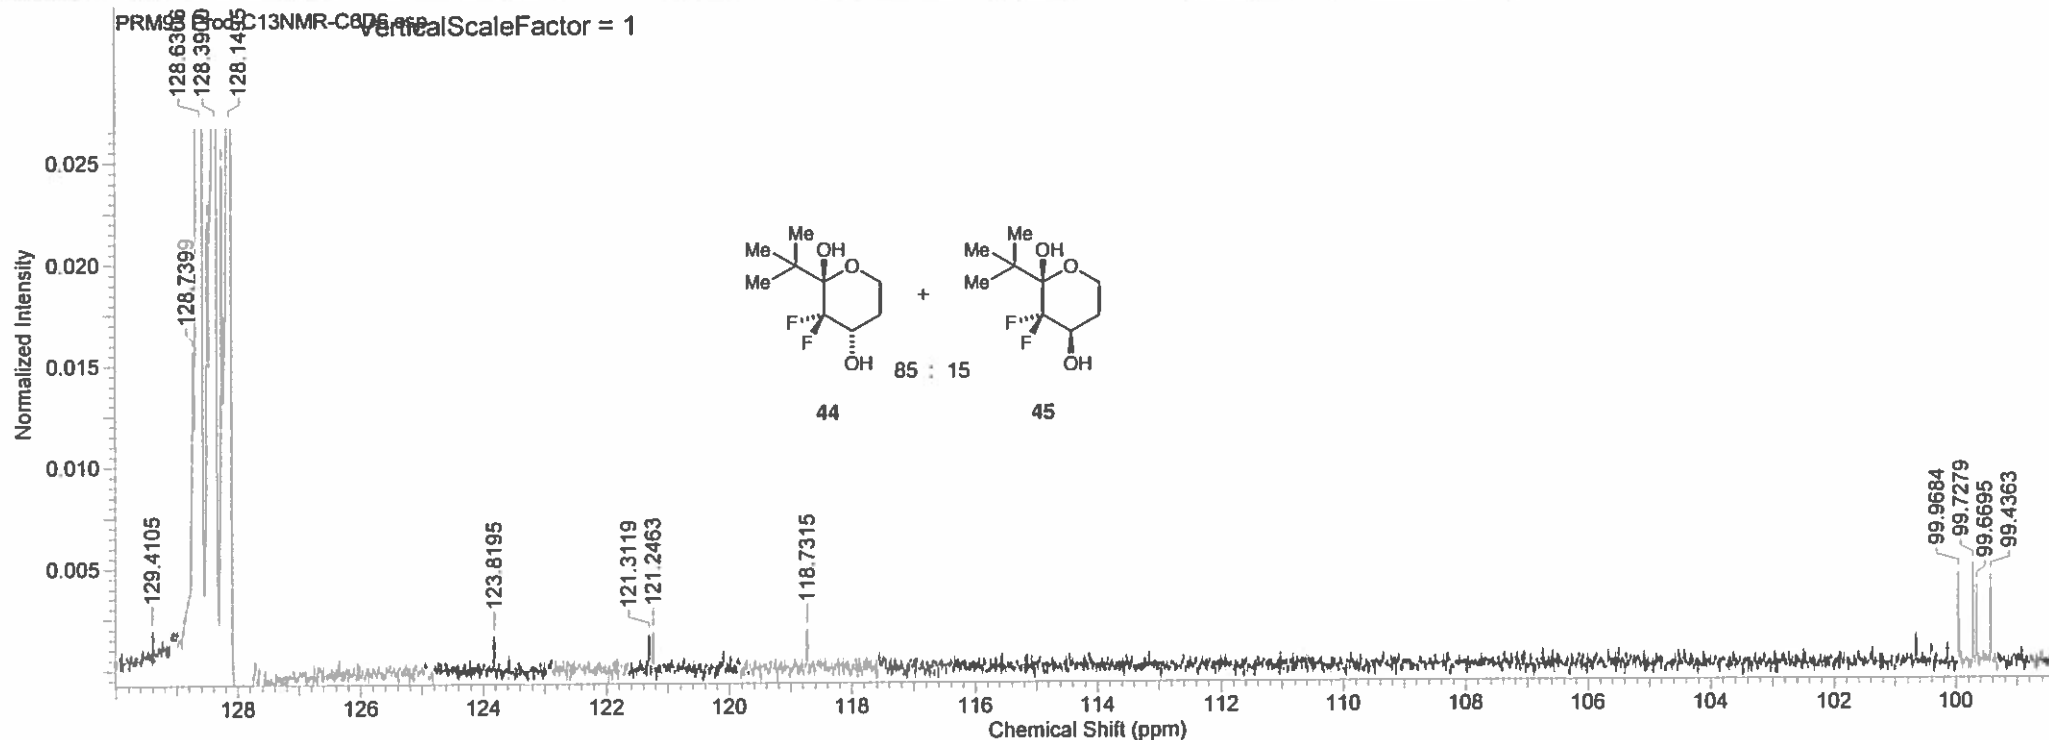

| No. | (ppm) | (Hz)   | Height | No. | (ppm) | (Hz)   | Height | No. | (ppm)  | (Hz)    | Height | No. | (ppm)  | (Hz)    | Height |
|-----|-------|--------|--------|-----|-------|--------|--------|-----|--------|---------|--------|-----|--------|---------|--------|
| 1   | 26.14 | 2630.8 | 0.0291 | 7   | 32.31 | 3252.1 | 0.0121 | 13  | 99.44  | 10007.1 | 0.0043 | 19  | 121.31 | 12208.6 | 0.0017 |
| 2   | 26.17 | 2633.7 | 0.0362 | 8   | 39.96 | 4021.7 | 0.0109 | 14  | 99.67  | 10030.5 | 0.0039 | 20  | 123.82 | 12460.9 | 0.0016 |
| 3   | 26.21 | 2637.4 | 0.0290 | 9   | 58.65 | 5902.6 | 0.0272 | 15  | 99.73  | 10036.4 | 0.0049 | 21  | 128.15 | 12896.7 | 0.9836 |
| 4   | 26.45 | 2661.6 | 0.0085 | 10  | 67.78 | 6821.1 | 0.0091 | 16  | 99.97  | 10060.6 | 0.0045 | 22  | 128.27 | 12909.2 | 0.0249 |
| 5   | 26.48 | 2664.5 | 0.0096 | 11  | 68.00 | 6843.1 | 0.0086 | 17  | 118.73 | 11948.9 | 0.0019 | 23  | 128.39 | 12920.9 | 1.0000 |
| 6   | 32.26 | 3246.2 | 0.0127 | 12  | 68.21 | 6864.3 | 0.0088 | 18  | 121.25 | 12202.0 | 0.0018 | 24  | 128.51 | 12932.6 | 0.0222 |
|     |       |        |        |     |       |        |        |     |        |         |        | 25  | 128.63 | 12945.1 | 0.9943 |
|     |       |        |        |     |       |        |        |     |        |         |        | 26  | 128.74 | 12956.1 | 0.0157 |
|     |       |        |        |     |       |        |        |     |        |         |        | 27  | 129.41 | 13023.6 | 0.0020 |

EJT-PRM93 Prod crystals CD2Cl2  
m19F CD2Cl2 /opt/oldbruk500data.11vii11/2013/Sep ejt 23

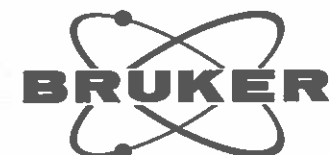

NAME 2013-09-10-ejt-23  
EXPNO 11  
PROCNO 1  
Date\_ 20130910  
Time 14.54  
INSTRUM spect  
PROBHD 5 mm PABBO BB-  
PULPROG zgfglqn  
TD 131072  
SOLVENT CD2Cl2  
NS 16  
DS 4  
SWH 113636.367 Hz  
FIDRES 0.866977 Hz  
AQ 0.5767668 sec  
RG 28.5  
DW 4.400 usec  
DE 6.50 usec  
TE 300.0 K  
D1 1.00000000 sec  
TD0 1

===== CHANNEL f1 =====  
NUC1 19F  
P1 17.50 usec  
PL1 -2.90 dB  
PL1W 48.97788239 W  
SFO1 470.5453180 MHz  
SI 65536  
SF 470.5923770 MHz  
WDW EM  
SSB 0  
LB 0.30 Hz  
GB 0  
PC 1.00

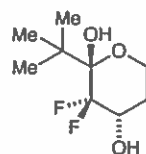

44

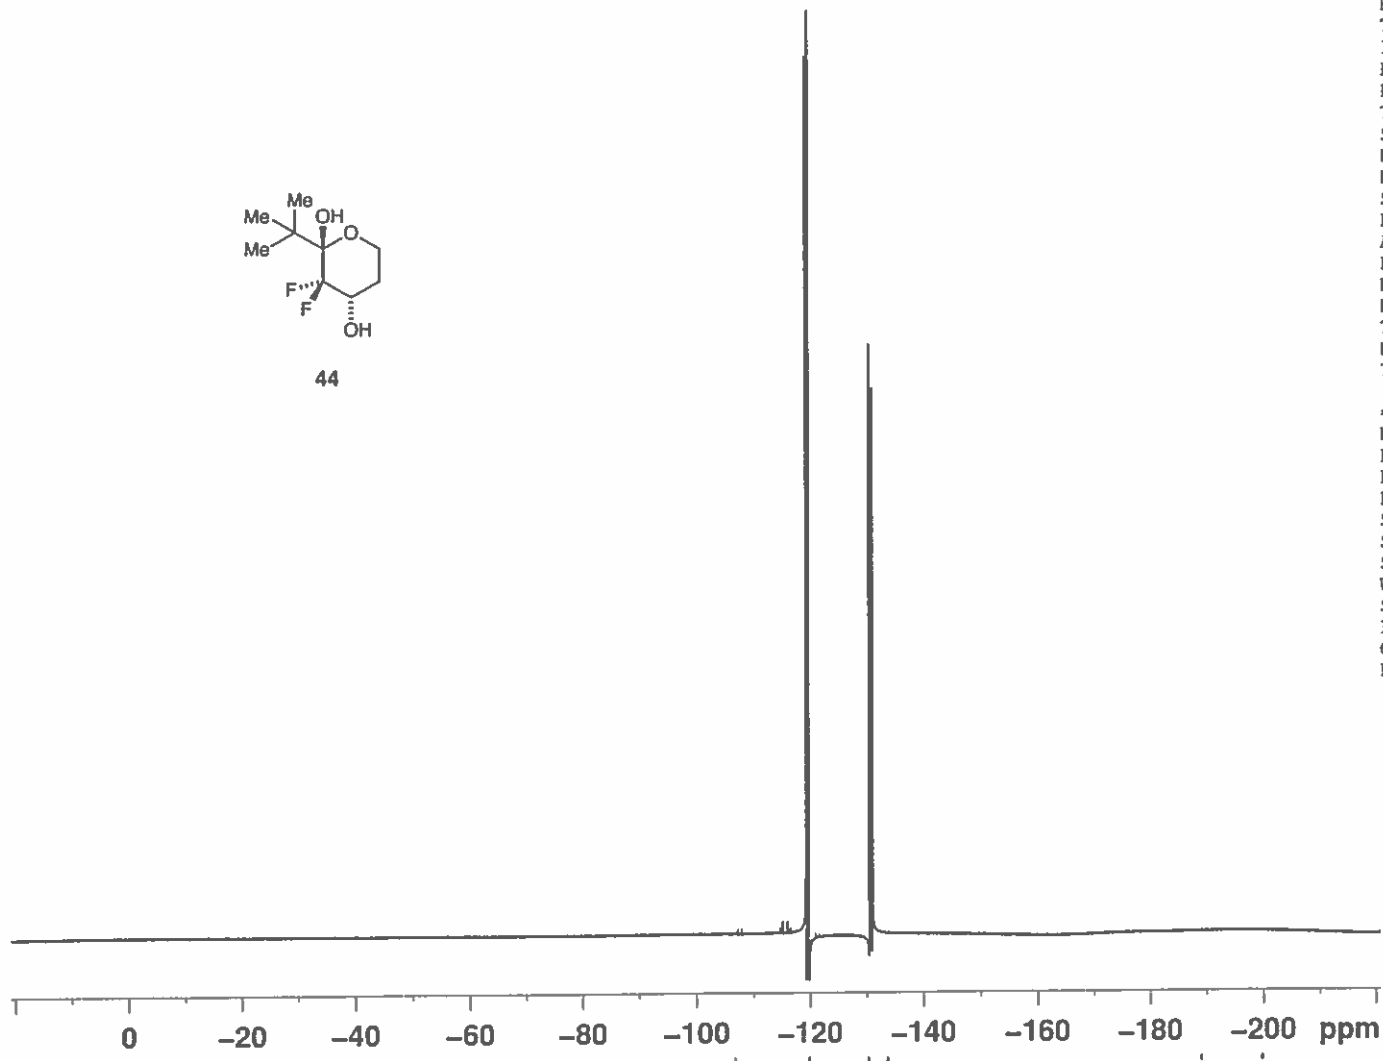



EJT-PRM93 Prod crystals in C6D6 2\*o/n  
 mPROTON C6D6 {e:\bruk400data\2013\Sep} ejt 17

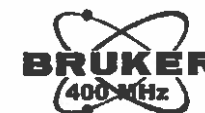

NAME 2013-09-12-ejt-17  
 EXPNO 10  
 PROCNO 1  
 Date\_ 20130912  
 Time 10.13  
 INSTRUM AV400  
 PROBHD 5 mm PABBO BB-  
 PULPROG zg30b  
 TD 65536  
 SOLVENT C6D6  
 NS 16  
 DS 0  
 SWH 8264.463 Hz  
 FIDRES 0.126106 Hz  
 AQ 3.9649780 sec  
 RG 114  
 DW 60.500 usec  
 DE 8.45 usec  
 TE 293.3 K  
 D1 1.00000000 sec  
 TD0 1

===== CHANNEL f1 =====  
 NUC1 1H  
 P1 14.50 usec  
 PL1 -3.60 dB  
 PL1W 17.83863831 W  
 SFO1 400.1324710 MHz  
 SI 32768  
 SF 400.1300000 MHz  
 WDW EM  
 SSB 0  
 LB 0.30 Hz  
 GB 0  
 PC 1.00

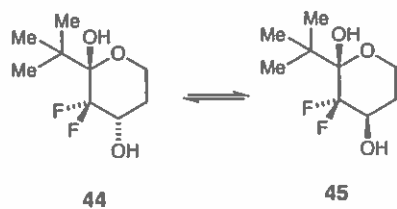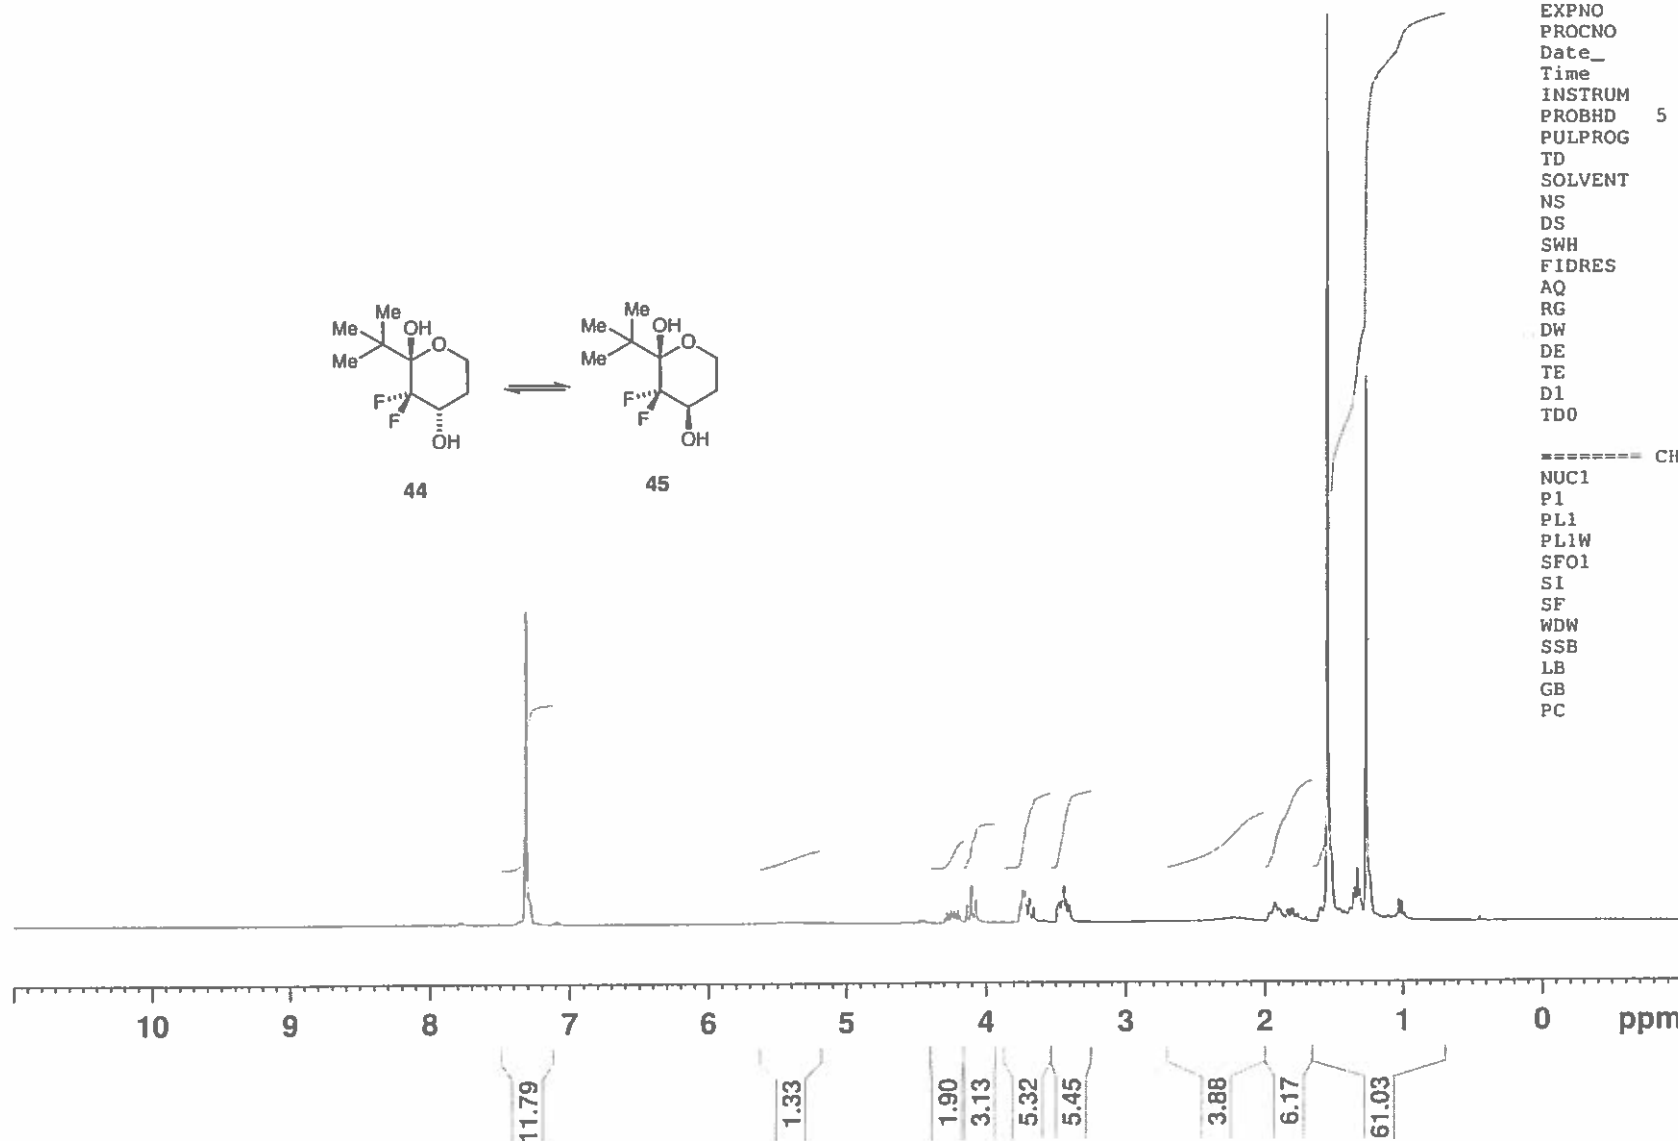

This report was created by ACD/NMR Processor Academic Edition. For more information go to [www.acddatabases.com/nmr/processor/](http://www.acddatabases.com/nmr/processor/)

|                        |                                                                                                                                      |                   |                                                                                         |                        |            |
|------------------------|--------------------------------------------------------------------------------------------------------------------------------------|-------------------|-----------------------------------------------------------------------------------------|------------------------|------------|
| Acquisition Time (sec) | 1.3631                                                                                                                               | Comment           | EJT-PRM93 Prod crystals mCARBON C6D6 (E:\bruk400service_data\2013\Sep) Administrator 10 |                        |            |
| Date                   | 12 Sep 2013 06:00:48                                                                                                                 | Date Stamp        | 12 Sep 2013 06:00:48                                                                    |                        |            |
| File Name              | \\ss7a.ds.man.ac.uk\vol5\vol3\users\snmr\data\bruk400service_data\2013\Sep\data\Administrator\nmr\2013-09-11-Administrator-10\10\vid |                   |                                                                                         |                        |            |
| Frequency (MHz)        | 100.64                                                                                                                               | Nucleus           | 13C                                                                                     | Number of Transients   | 12000      |
| Original Points Count  | 32768                                                                                                                                | Owner             | Administrator                                                                           | Points Count           | 32768      |
| Receiver Gain          | 2050.00                                                                                                                              | SW(cyclical) (Hz) | 24038.46                                                                                | Solvent                | BENZENE-d6 |
| Spectrum Type          | STANDARD                                                                                                                             | Sweep Width (Hz)  | 24037.73                                                                                | Temperature (degree C) | 18.900     |
|                        |                                                                                                                                      |                   |                                                                                         | Pulse Sequence         | zgpg30     |
|                        |                                                                                                                                      |                   |                                                                                         | Spectrum Offset (Hz)   | 10119.6650 |

PRM93 equilibrated mixture C13-C6D6 25%  
VerticalScaleFactor = 1

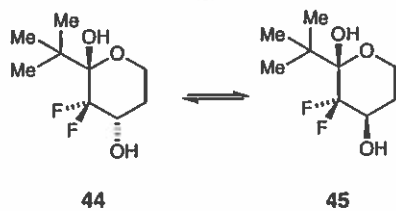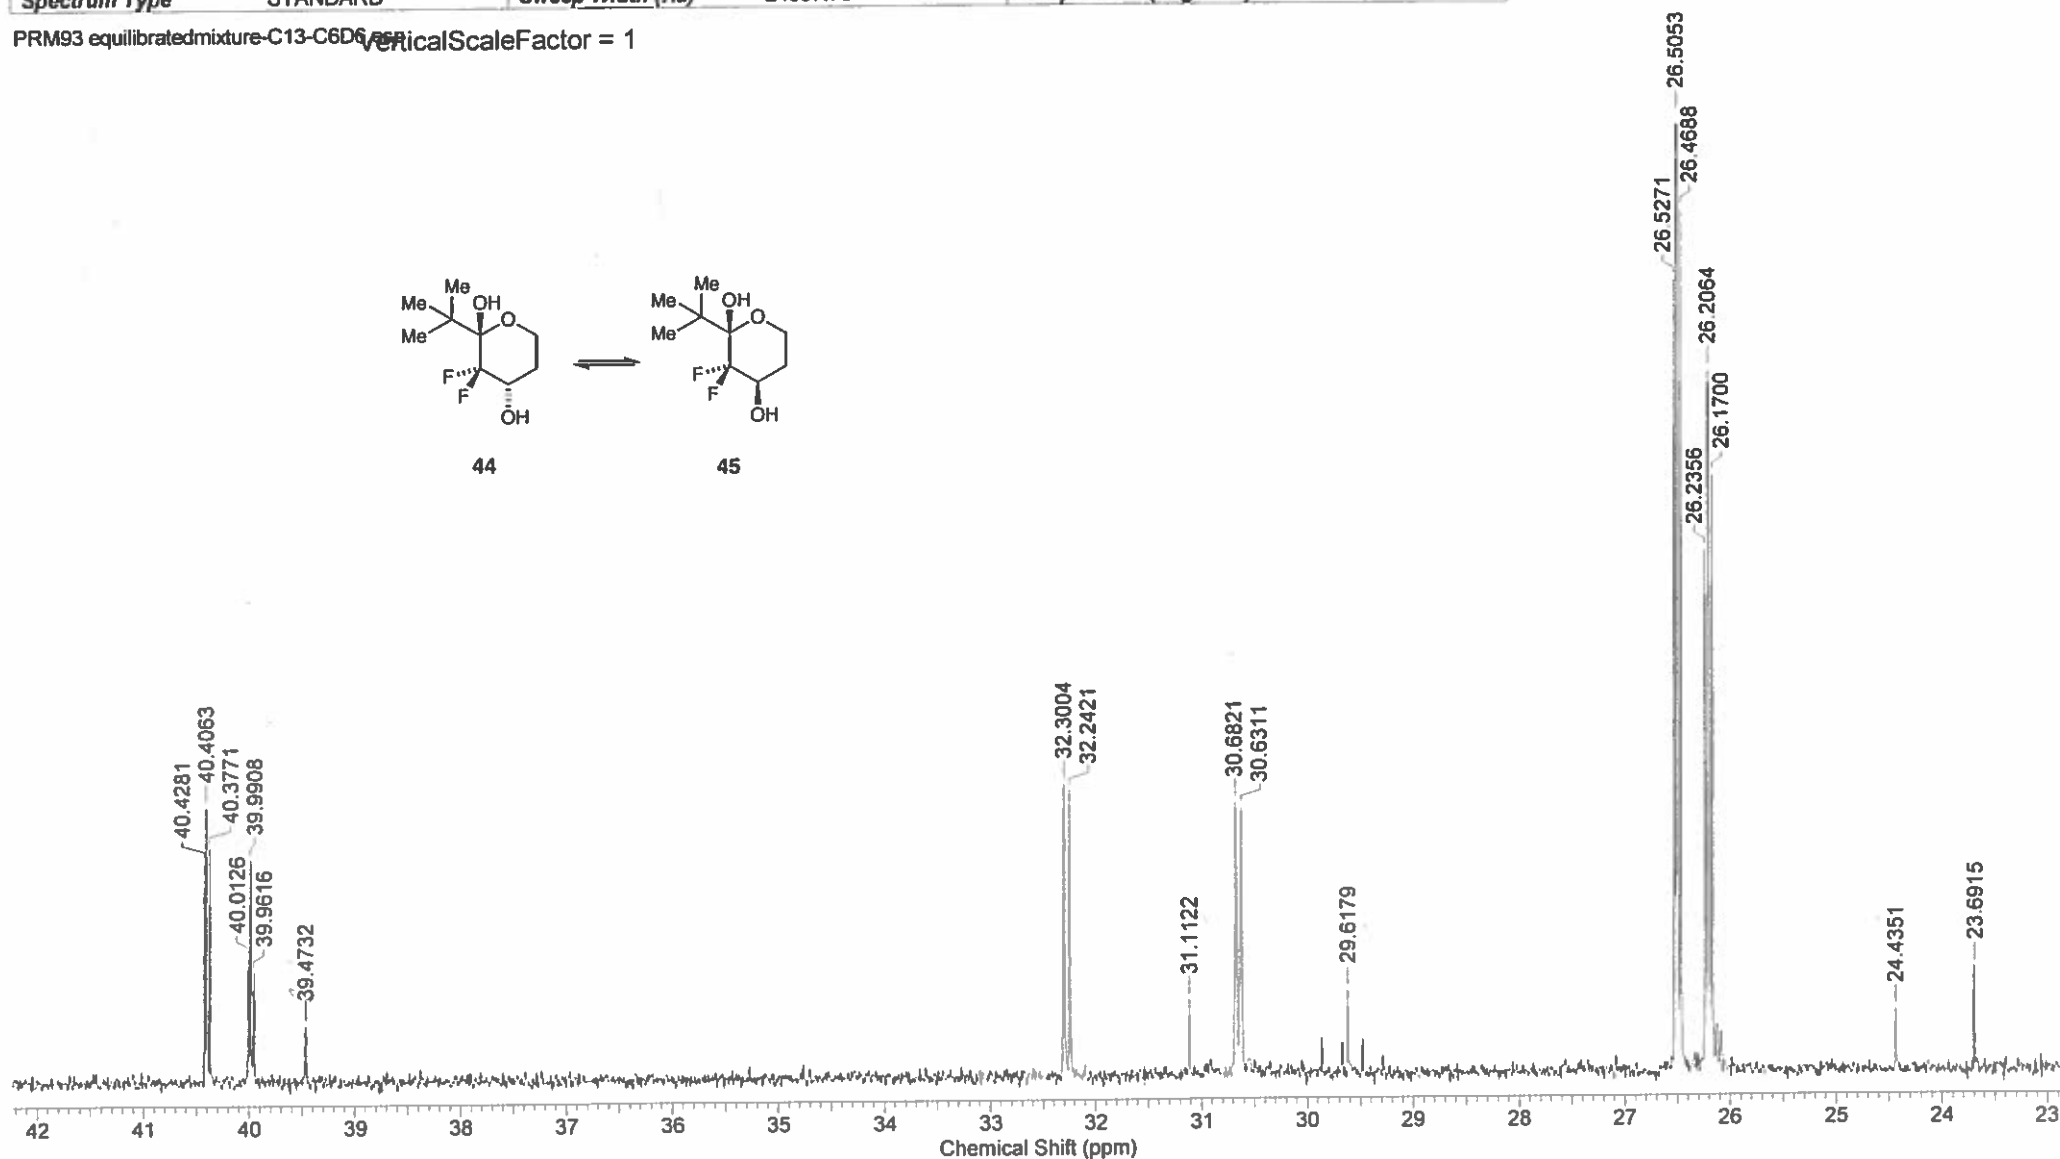

This report was created by ACD/NMR Processor Academic Edition. For more information go to [www.acdlabs.com/nmrproc/](http://www.acdlabs.com/nmrproc/)

This report was created by ACD/NMR Processor Academic Edition. For more information go to [www.acdnlabs.com/nmr/proc/](http://www.acdnlabs.com/nmr/proc/)

|                        |                                                                                                                                     |                   |                                                                                         |                        |            |
|------------------------|-------------------------------------------------------------------------------------------------------------------------------------|-------------------|-----------------------------------------------------------------------------------------|------------------------|------------|
| Acquisition Time (sec) | 1.3631                                                                                                                              | Comment           | EJT-PRM93 Prod crystals mCARBON C6D6 (E:\bruk400service_data\2013\Sep) Administrator 10 |                        |            |
| Date                   | 12 Sep 2013 06:00:48                                                                                                                | Date Stamp        | 12 Sep 2013 06:00:48                                                                    |                        |            |
| File Name              | \\ss7a.ds.man.ac.uk\vol5\vol3\users\snmrdata\bruk400service_data\2013\Sep\data\Administrator\nmr\2013-09-11-Administrator-10\10\fid |                   |                                                                                         |                        |            |
| Frequency (MHz)        | 100.64                                                                                                                              | Nucleus           | 13C                                                                                     | Number of Transients   | 12000      |
| Original Points Count  | 32768                                                                                                                               | Owner             | Administrator                                                                           | Points Count           | 32768      |
| Receiver Gain          | 2050.00                                                                                                                             | SW(cyclical) (Hz) | 24038.46                                                                                | Solvent                | BENZENE-d6 |
| Spectrum Type          | STANDARD                                                                                                                            | Sweep Width (Hz)  | 24037.73                                                                                | Temperature (degree C) | 18.900     |
|                        |                                                                                                                                     |                   |                                                                                         | Origin                 | AV400_S    |
|                        |                                                                                                                                     |                   |                                                                                         | Pulse Sequence         | zgpg30     |
|                        |                                                                                                                                     |                   |                                                                                         | Spectrum Offset (Hz)   | 10119.6650 |

PRM93 equilibrated mixture C13-C6D6 asf  
VerticalScaleFactor = 1

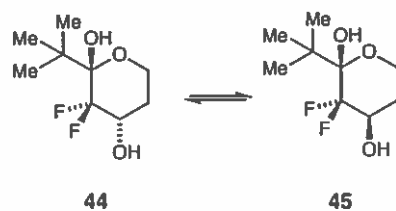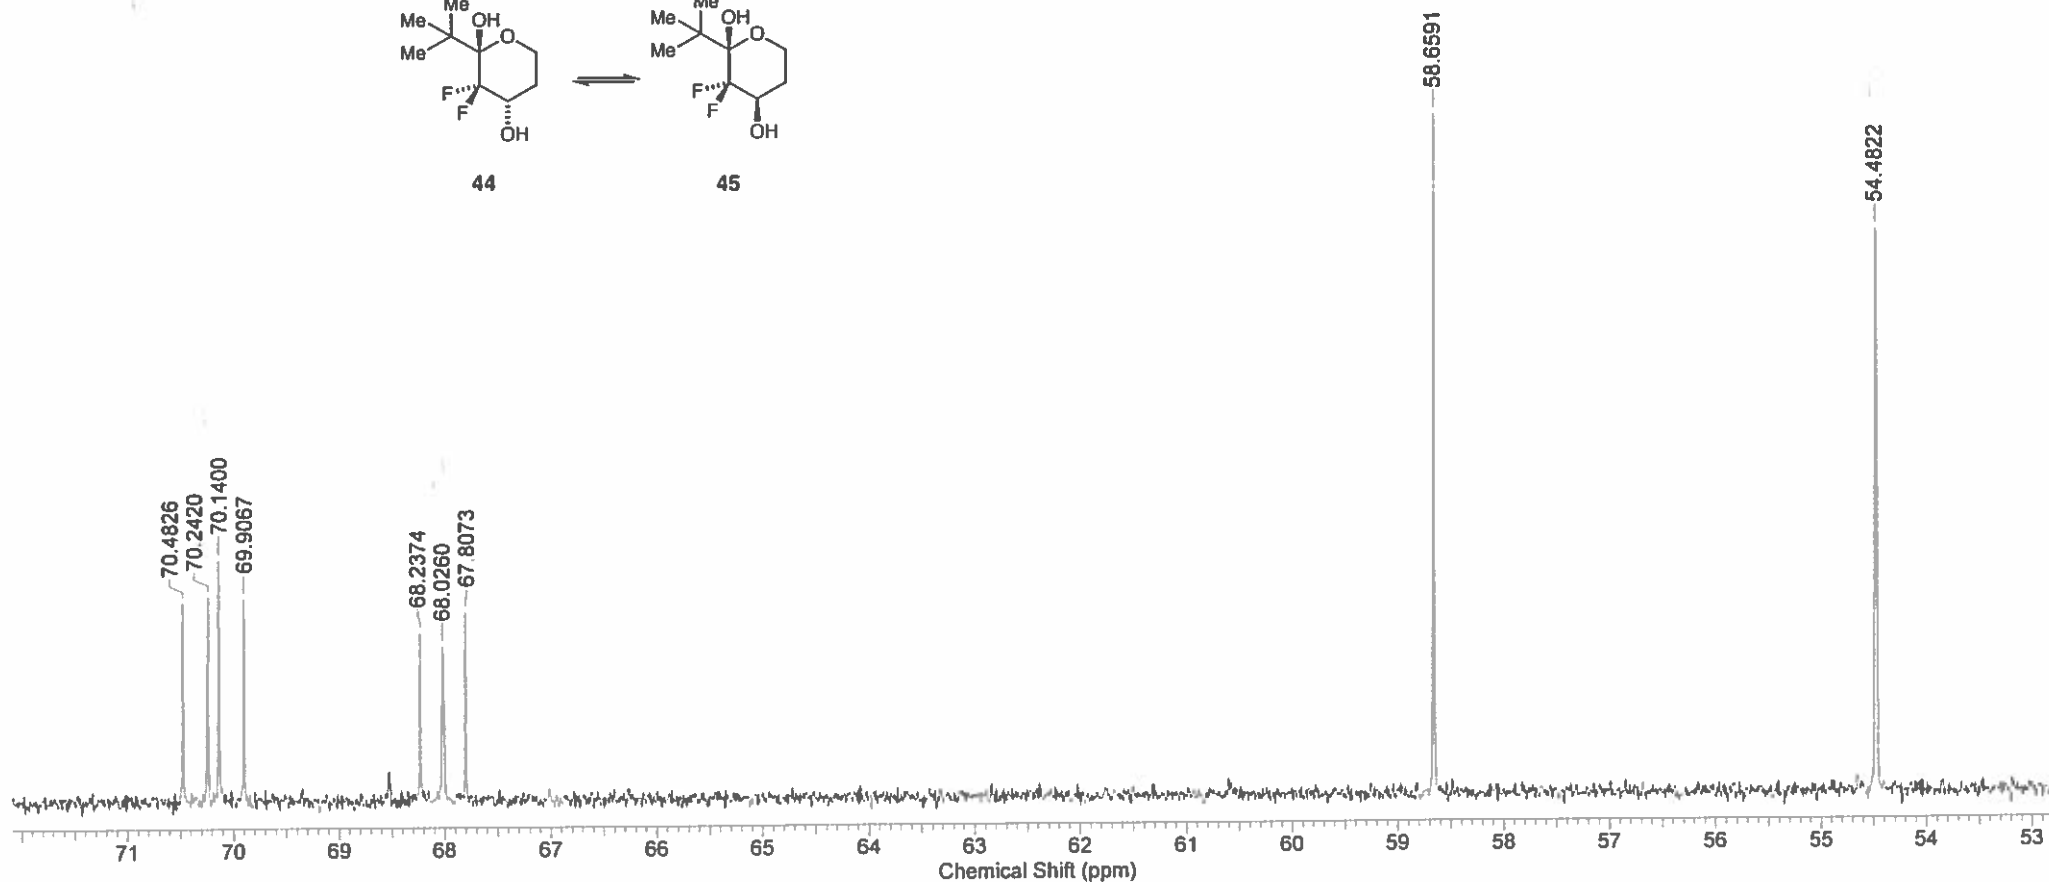

This report was created by ACD/NMR Processor Academic Edition. For more information go to [www.acdlabs.com/nmrproc/](http://www.acdlabs.com/nmrproc/)

|                        |                                                                                                                                     |                   |                                                                                         |                        |            |                      |            |
|------------------------|-------------------------------------------------------------------------------------------------------------------------------------|-------------------|-----------------------------------------------------------------------------------------|------------------------|------------|----------------------|------------|
| Acquisition Time (sec) | 1.3631                                                                                                                              | Comment           | EJT-PRM93 Prod crystals mCARBON C6D6 (E:\bruk400service_data\2013\Sep) Administrator 10 |                        |            |                      |            |
| Date                   | 12 Sep 2013 06:00:48                                                                                                                | Date Stamp        | 12 Sep 2013 06:00:48                                                                    |                        |            |                      |            |
| File Name              | \\ss7a.ds.man.ac.uk\vol5\vol3\users\snmrdata\bruk400service_data\2013\Sep\data\Administrator\nmr\2013-09-11-Administrator-10\10\fid |                   |                                                                                         |                        |            |                      |            |
| Frequency (MHz)        | 100.64                                                                                                                              | Nucleus           | 13C                                                                                     | Number of Transients   | 12000      | Origin               | AV400_S    |
| Original Points Count  | 32768                                                                                                                               | Owner             | Administrator                                                                           | Points Count           | 32768      | Pulse Sequence       | zgpg30     |
| Receiver Gain          | 2050.00                                                                                                                             | SW(cyclical) (Hz) | 24038.46                                                                                | Solvent                | BENZENE-d6 | Spectrum Offset (Hz) | 10119.6650 |
| Spectrum Type          | STANDARD                                                                                                                            | Sweep Width (Hz)  | 24037.73                                                                                | Temperature (degree C) | 18.900     |                      |            |

PRM93 equilibratedmixture-C13-C6D6.esp

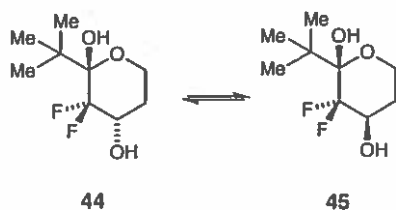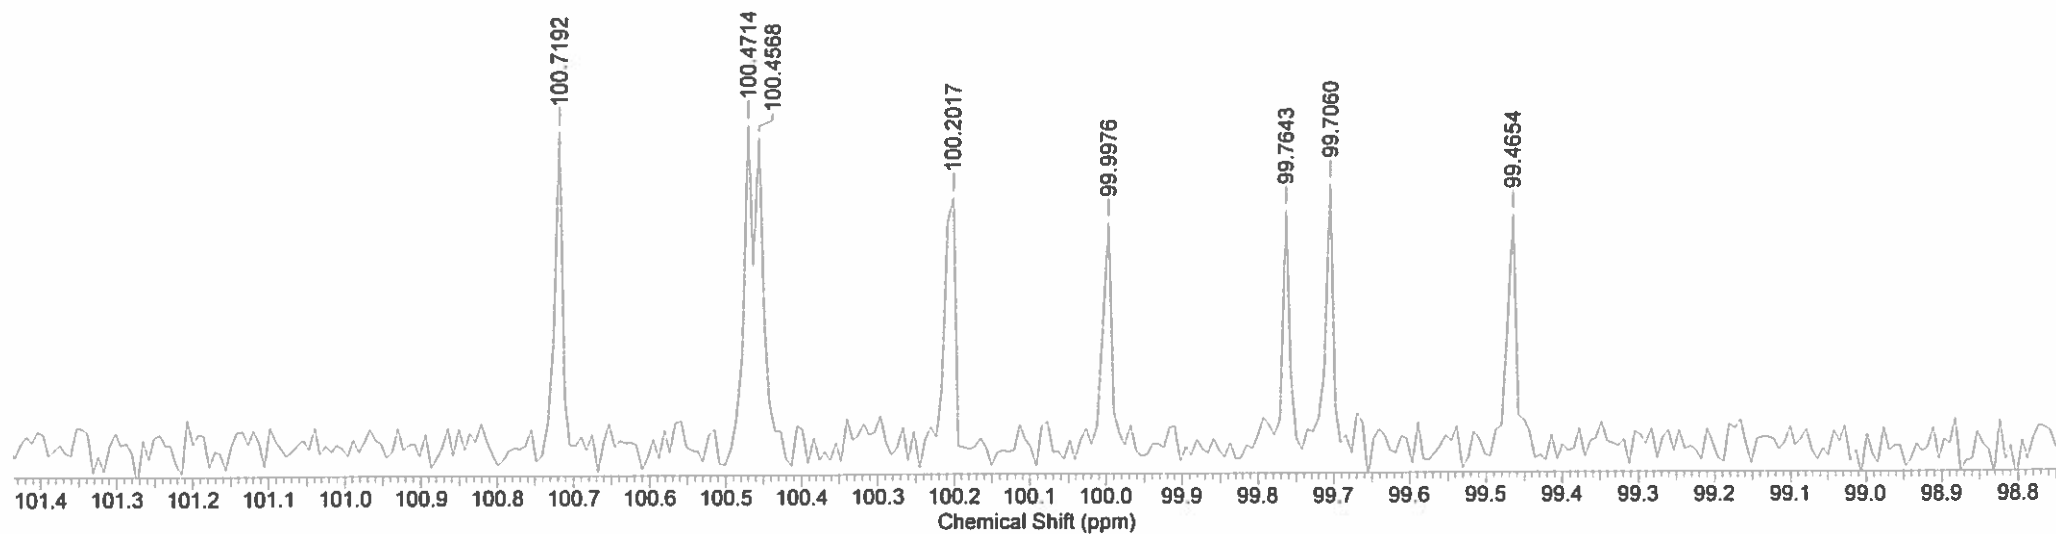

This report was created by ACD/NMR Processor Academic Edition. For more information go to [www.acdlabs.com/nmrproc/](http://www.acdlabs.com/nmrproc/)

|                                                                                                                  |                                                                                                                                     |                   |                                                                                         |                        |            |                      |            |
|------------------------------------------------------------------------------------------------------------------|-------------------------------------------------------------------------------------------------------------------------------------|-------------------|-----------------------------------------------------------------------------------------|------------------------|------------|----------------------|------------|
| This report was created by ACD/NAME Processors Academic Edition. For more information go to: www.academicnmr.com |                                                                                                                                     |                   |                                                                                         |                        |            |                      |            |
| Acquisition Time (sec)                                                                                           | 1.3631                                                                                                                              | Comment           | EJT-PRM93 Prod crystals mCARBON C6D6 (E:\bruk400service_data\2013\Sep) Administrator 10 |                        |            |                      |            |
| Date                                                                                                             | 12 Sep 2013 06:00:48                                                                                                                | Date Stamp        | 12 Sep 2013 06:00:48                                                                    |                        |            |                      |            |
| File Name                                                                                                        | \\ss7a.ds.man.ac.uk\vol5\vol3\users\snmrdata\bruk400service_data\2013\Sep\data\Administrator\nmr\2013-09-11-Administrator-10\10\fid |                   |                                                                                         |                        |            |                      |            |
| Frequency (MHz)                                                                                                  | 100.64                                                                                                                              | Nucleus           | 13C                                                                                     | Number of Transients   | 12000      | Origin               | AV400_S    |
| Original Points Count                                                                                            | 32768                                                                                                                               | Owner             | Administrator                                                                           | Points Count           | 32768      | Pulse Sequence       | zgpg30     |
| Receiver Gain                                                                                                    | 2050.00                                                                                                                             | SW(cyclical) (Hz) | 24038.46                                                                                | Solvent                | BENZENE-d6 | Spectrum Offset (Hz) | 10119.6650 |
| Spectrum Type                                                                                                    | STANDARD                                                                                                                            | Sweep Width (Hz)  | 24037.73                                                                                | Temperature (degree C) | 18.900     |                      |            |

PRM93 equilibratedmixture-C13-C6D6.esp

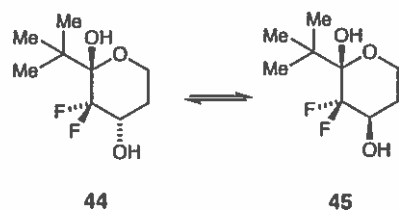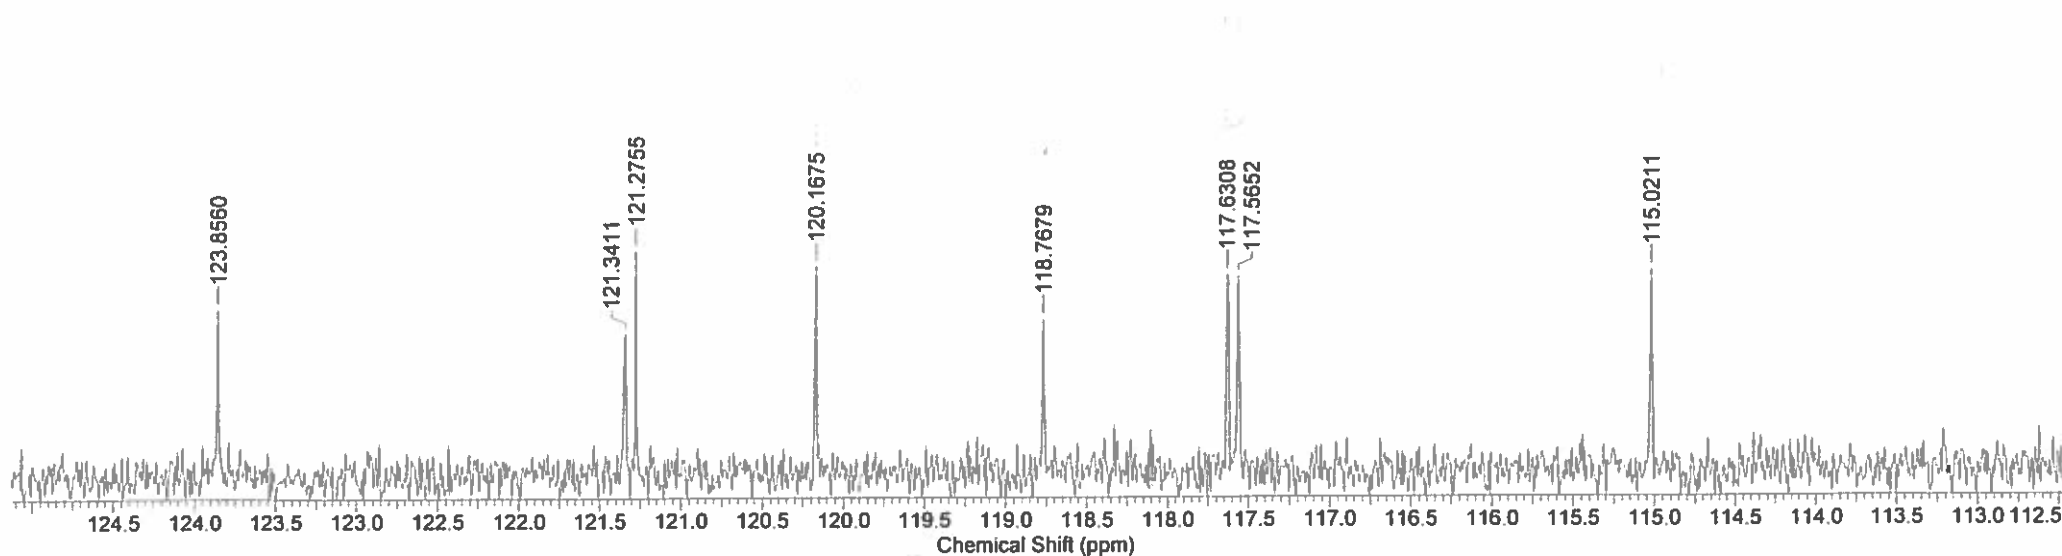

This report was created by ACD/NMR Processor Academic Edition. For more information go to [www.acdlabs.com/nmrproc/](http://www.acdlabs.com/nmrproc/)

|                        |                                                                                                  |                        |                                                                                    |                      |             |
|------------------------|--------------------------------------------------------------------------------------------------|------------------------|------------------------------------------------------------------------------------|----------------------|-------------|
| Acquisition Time (sec) | 0.7340                                                                                           | Comment                | EJT-PRM93 Prod crystals in C6D6 2"/n mF19CPD C6D6 (e:\bruk400data\2013\Sep)\ejt 17 |                      |             |
| Date                   | 12 Sep 2013 10:14:40                                                                             | Date Stamp             | 12 Sep 2013 10:14:40                                                               |                      |             |
| File Name              | \ss7a.ds.man.ac.uk\vol3\users\snmrdata\bruk400data\2013\Sep\data\ejt\nmr\2013-09-12-ejt-17\11Vid |                        |                                                                                    | Frequency (MHz)      | 376.50      |
| Nucleus                | 19F                                                                                              | Number of Transients   | 16                                                                                 | Origin               | AV400       |
| Owner                  | Administrator                                                                                    | Points Count           | 65536                                                                              | Pulse Sequence       | zgig        |
| SW(cyclical) (Hz)      | 89285.71                                                                                         | Solvent                | BENZENE-d6                                                                         | Spectrum Offset (Hz) | -37649.5977 |
| Sweep Width (Hz)       | 89284.35                                                                                         | Temperature (degree C) | 20.500                                                                             | Spectrum Type        | STANDARD    |

PRM93 equilibrated mixture-F19-C6D6 ASP  
VerticalScaleFactor = 1

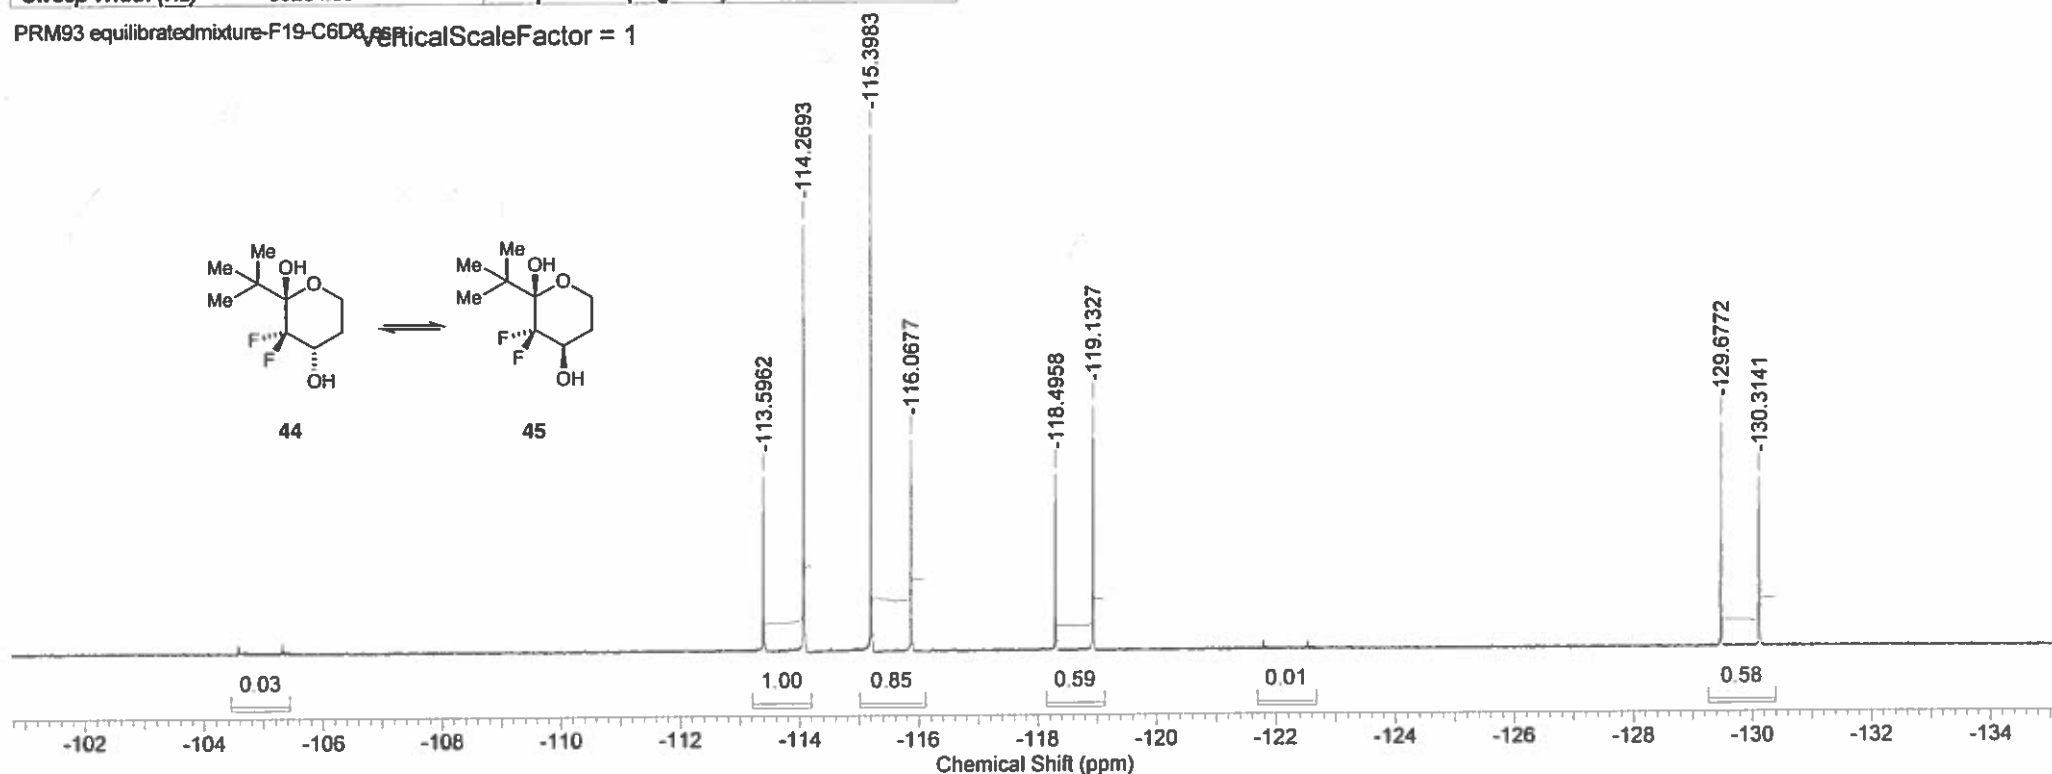

| No. | (ppm)                  | Value         | Absolute Value | Non-Negative Value |
|-----|------------------------|---------------|----------------|--------------------|
| 1   | 5932 .. -1290.57895821 | 1.36767340e+7 | 0.57895821     |                    |
| 2   | 3756 .. -1210.00921777 | 2.17751453e+5 | 0.00921777     |                    |
| 3   | 3266 .. -1180.59456044 | 1.40453060e+7 | 0.59456044     |                    |
| 4   | 3128 .. -1150.84520292 | 1.99662340e+7 | 0.84520292     |                    |
| 5   | 3975 .. -1131.00384212 | 2.37137700e+7 | 1.00384212     |                    |
| 6   | 5377 .. -1040.02603587 | 6.15045438e+5 | 0.02603587     |                    |

EJT-PRM94 f7-16 47mg  
mPROTON CDCl3 /opt/oldbruk500data.11vii11/2013/Jun ejt 15

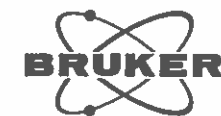

NAME 2013-06-12-ejt-15  
EXPNO 10  
PROCNO 1  
Date\_ 20130612  
Time 15.56  
INSTRUM spect  
PROBHD 5 mm PABBO BB-  
PULPROG zg30b  
TD 65536  
SOLVENT CDCl3  
NS 16  
DS 0  
SWH 10330.578 Hz  
FIDRES 0.157632 Hz  
AQ 3.1719923 sec  
RG 20.2  
DW 48.400 usec  
DE 13.00 usec  
TE 298.0 K  
D1 1.00000000 sec  
TD0 1

===== CHANNEL f1 =====  
NUC1 1H  
P1 10.00 usec  
PL1 -0.10 dB  
PL1W 26.21803665 W  
SFO1 500.1330885 MHz  
SI 32768  
SF 500.1300610 MHz  
WDW EM  
SSB 0  
LB 0.30 Hz  
GB 0  
PC 1.00

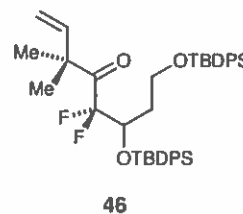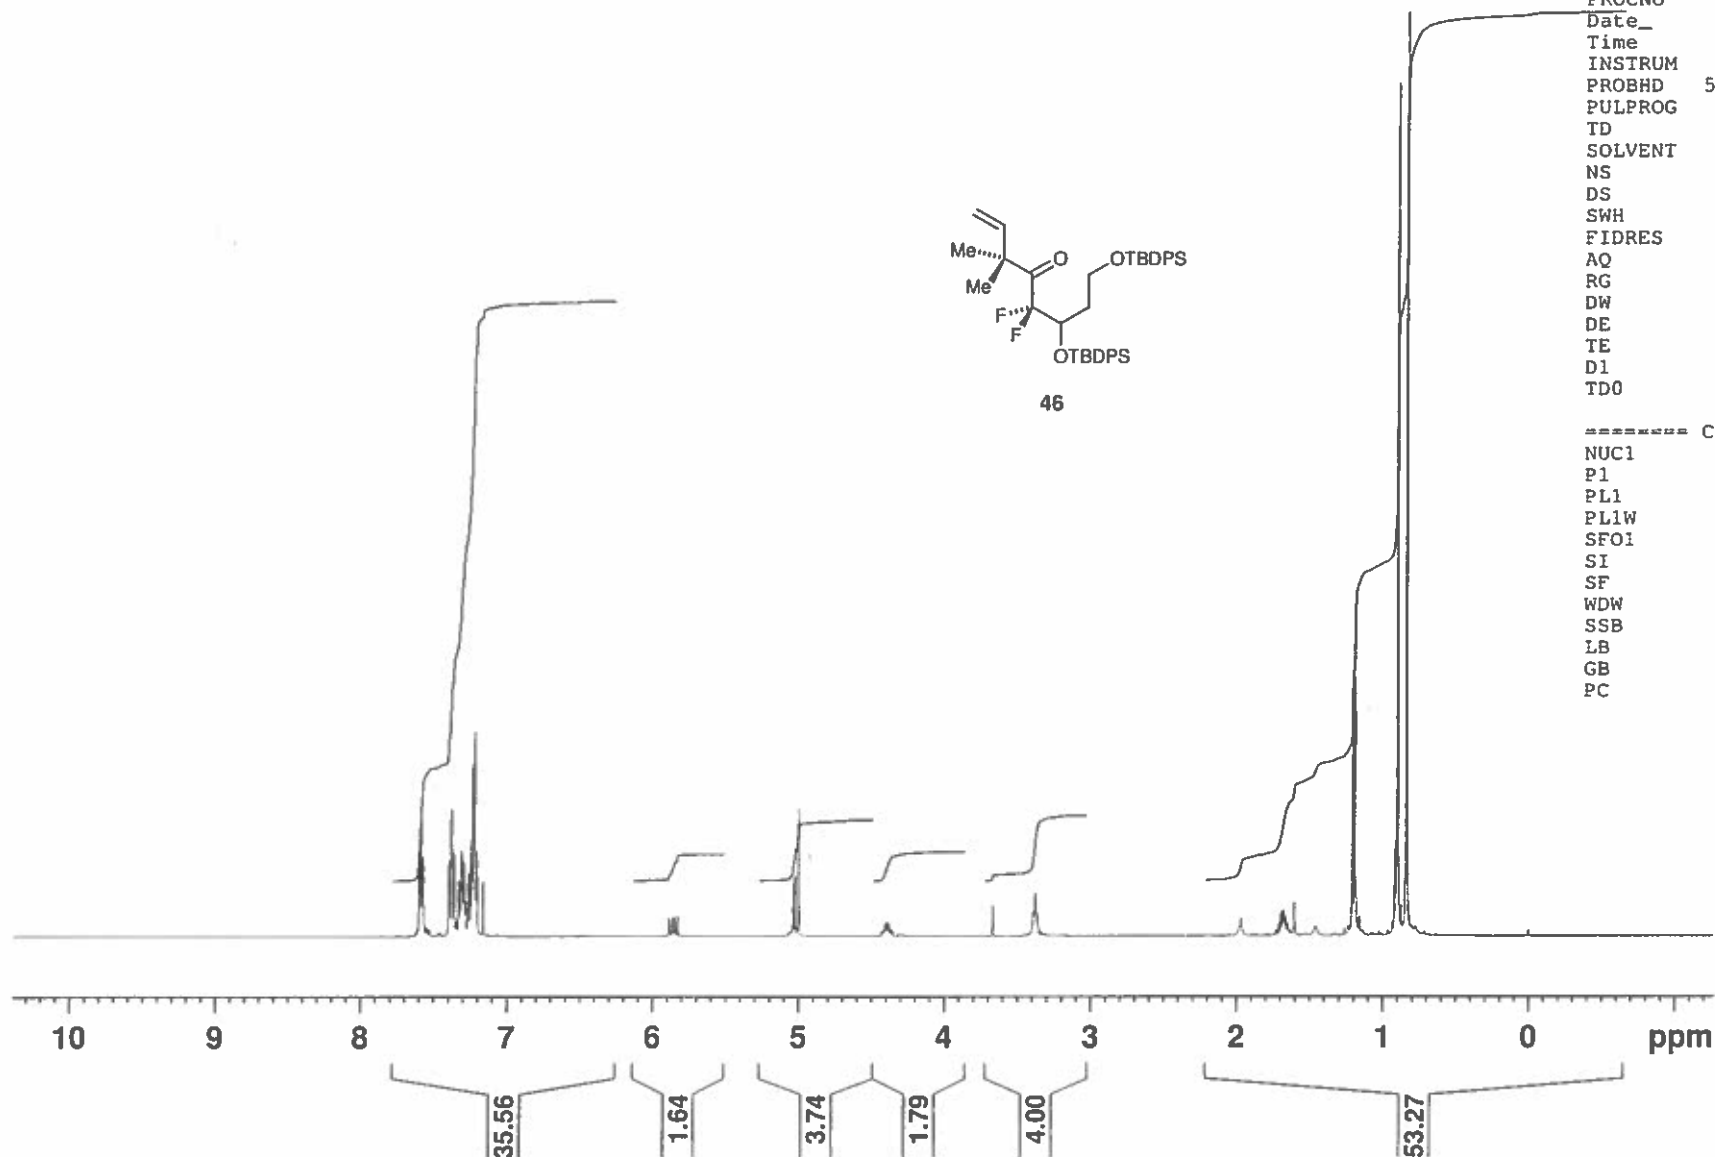

|                        |                                                                                                                           |                   |                                                                                    |                        |              |                                 |
|------------------------|---------------------------------------------------------------------------------------------------------------------------|-------------------|------------------------------------------------------------------------------------|------------------------|--------------|---------------------------------|
| Acquisition Time (sec) | 1.1010                                                                                                                    | Comment           | EJT-PRM94 Prod data mCARBONnight CDCI3 /opt/oldbruk500data.11vii11/2013/Jun ejt 15 |                        |              |                                 |
| Date                   | 13 Jun 2013 04:54:40                                                                                                      | Date Stamp        | 13 Jun 2013 04:54:40                                                               |                        |              |                                 |
| File Name              | \\ss7a.ds.man.ac.uk\vol5\VOL3\USERS\SNMRDATA\BRUK500DATA\BRUK500DATA\2013JUN\DATA\EJT\NMR\2013-06-12-EJT-15\20\PDATA\111R |                   |                                                                                    |                        |              |                                 |
| Frequency (MHz)        | 125.76                                                                                                                    | Nucleus           | 13C                                                                                | Number of Transients   | 3072         | Origin spect                    |
| Original Points Count  | 32768                                                                                                                     | Owner             | vnmr1                                                                              | Points Count           | 32768        | Pulse Sequence zgpg30           |
| Receiver Gain          | 512.00                                                                                                                    | SW(cyclical) (Hz) | 29761.90                                                                           | Solvent                | CHLOROFORM-d | Spectrum Offset (Hz) 12571.1670 |
| Spectrum Type          | STANDARD                                                                                                                  | Sweep Width (Hz)  | 29761.00                                                                           | Temperature (degree C) | 25.029       |                                 |

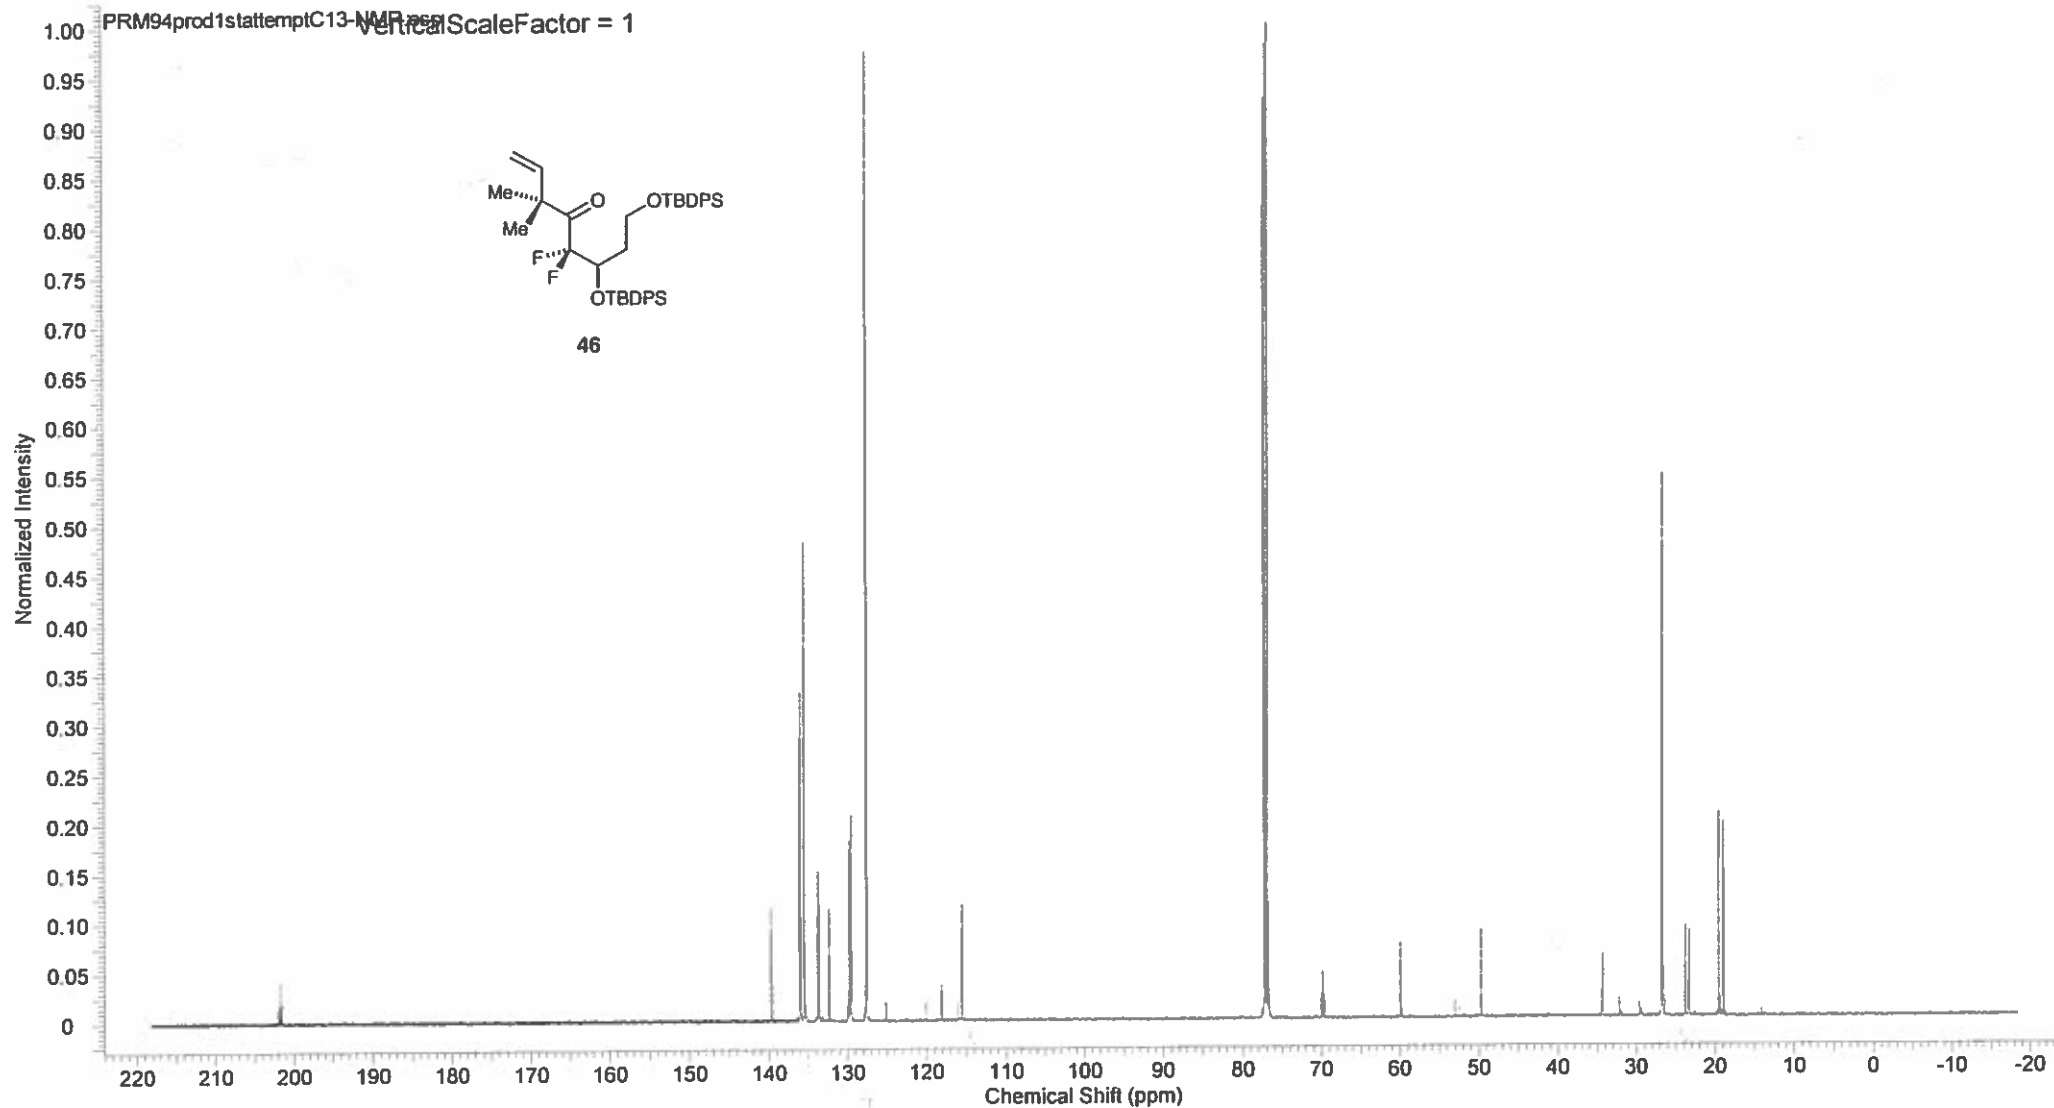



|                        |                                                                                                                    |                        |                                                                                   |                      |             |
|------------------------|--------------------------------------------------------------------------------------------------------------------|------------------------|-----------------------------------------------------------------------------------|----------------------|-------------|
| Acquisition Time (sec) | 0.5767                                                                                                             | Comment                | ETJ-PRM94 prod frags 354mg m19FCPD CDCl3 /opt/oldbruk500data.11v11/2013/Aug ejt 1 |                      |             |
| Date                   | 24 Aug 2013 18:04:00                                                                                               | Date Stamp             | 24 Aug 2013 18:04:00                                                              |                      |             |
| File Name              | \\ss7a.ds.man.ac.uk\vol5\vol3\users\snmrdata\bruk500data\bruk500data\2013\Aug\data\ejt\nmr\2013-08-24-ejt-1\12\fid |                        |                                                                                   | Frequency (MHz)      | 470.59      |
| Nucleus                | 19F                                                                                                                | Number of Transients   | 16                                                                                | Origin               | spect       |
| Owner                  | nmr1                                                                                                               | Points Count           | 65536                                                                             | Pulse Sequence       | zgfhgqn     |
| SW (cyclical) (Hz)     | 113636.37                                                                                                          | Solvent                | CHLOROFORM-d                                                                      | Spectrum Offset (Hz) | -47059.0234 |
| Sweep Width (Hz)       | 113634.63                                                                                                          | Temperature (degree C) | 27.000                                                                            | Spectrum Type        | STANDARD    |

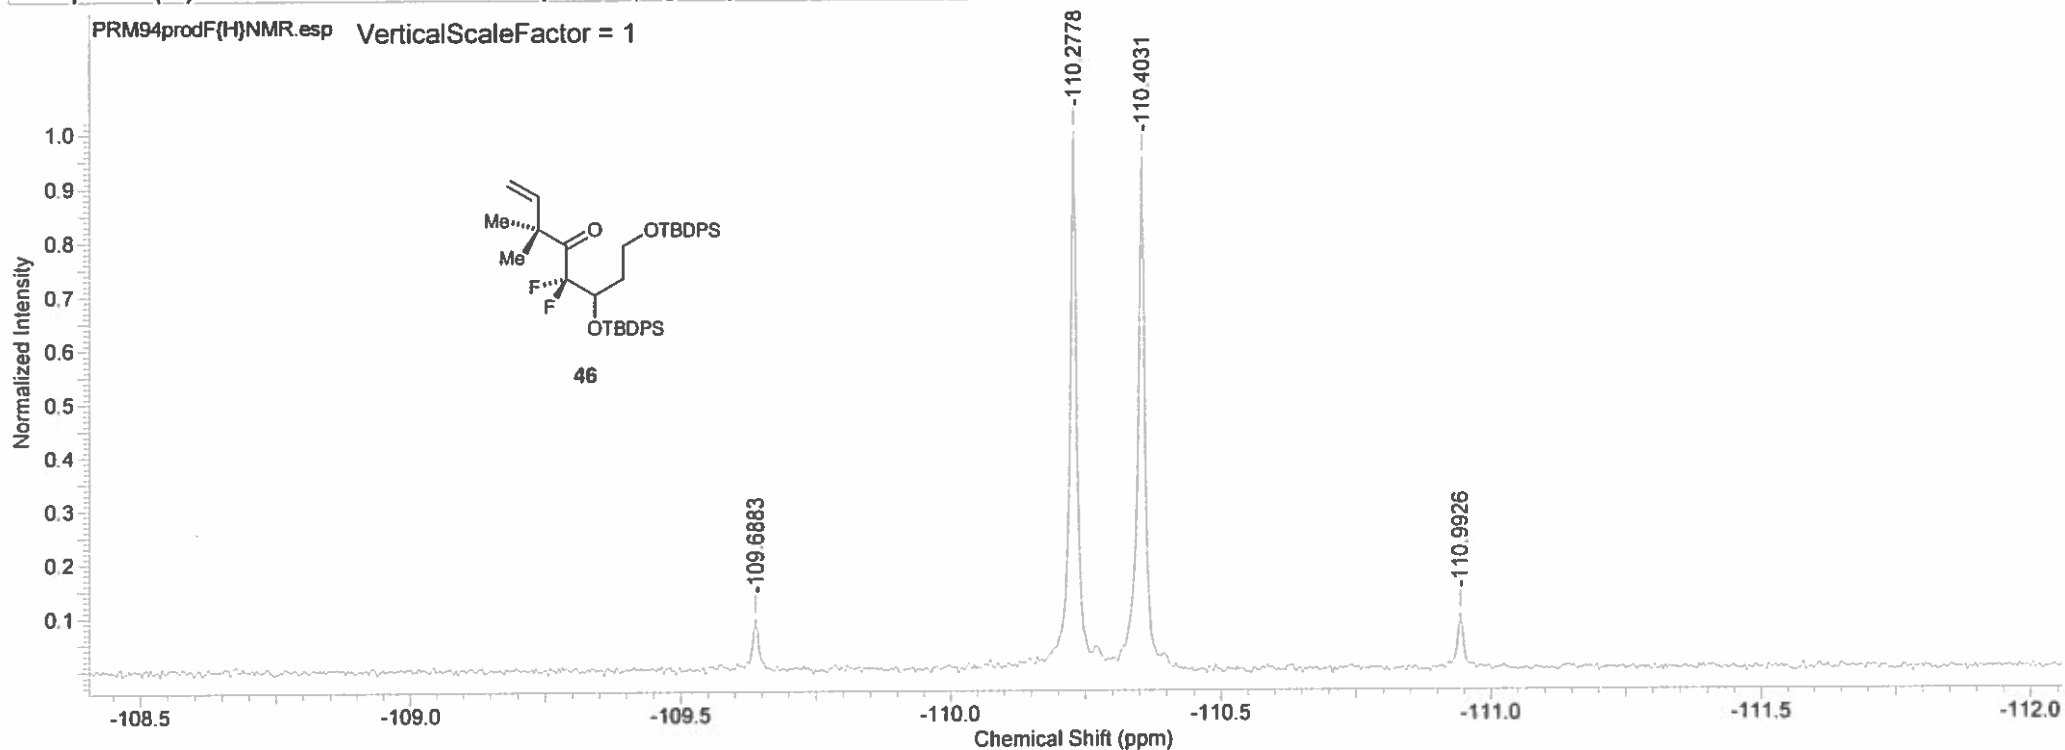

| No. | (ppm)   | (Hz)     | Height |
|-----|---------|----------|--------|
| 1   | -110.99 | -52232.3 | 0.1008 |
| 2   | -110.40 | -51954.8 | 0.9523 |
| 3   | -110.28 | -51895.9 | 1.0000 |
| 4   | -109.69 | -51618.5 | 0.0963 |

EJT-PRM95 Product data  
mPROTON C6D6 /opt/oldbruk500data.11vii11/2013/Sep ejt 11

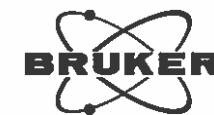

NAME 2013-09-20-ejt-11  
EXPNO 10  
PROCNO 1  
Date\_ 20130920  
Time 10.35  
INSTRUM spect  
PROBHD 5 mm PABBO BB-  
PULPROG zg30b  
TD 65536  
SOLVENT C6D6  
NS 16  
DS 0  
SWH 10330.578 Hz  
FIDRES 0.157632 Hz  
AQ 3.1719923 sec  
RG 22.6  
DW 48.400 usec  
DE 13.00 usec  
TE 300.0 K  
D1 1.00000000 sec  
TD0 1

===== CHANNEL f1 =====  
NUC1 1H  
P1 10.00 usec  
PL1 -0.10 dB  
PL1W 26.21803665 W  
SFO1 500.1330885 MHz  
SI 32768  
SF 500.1300778 MHz  
WDW EM  
SSB 0  
LB 0.30 Hz  
GB 0  
PC 1.00

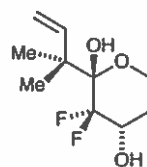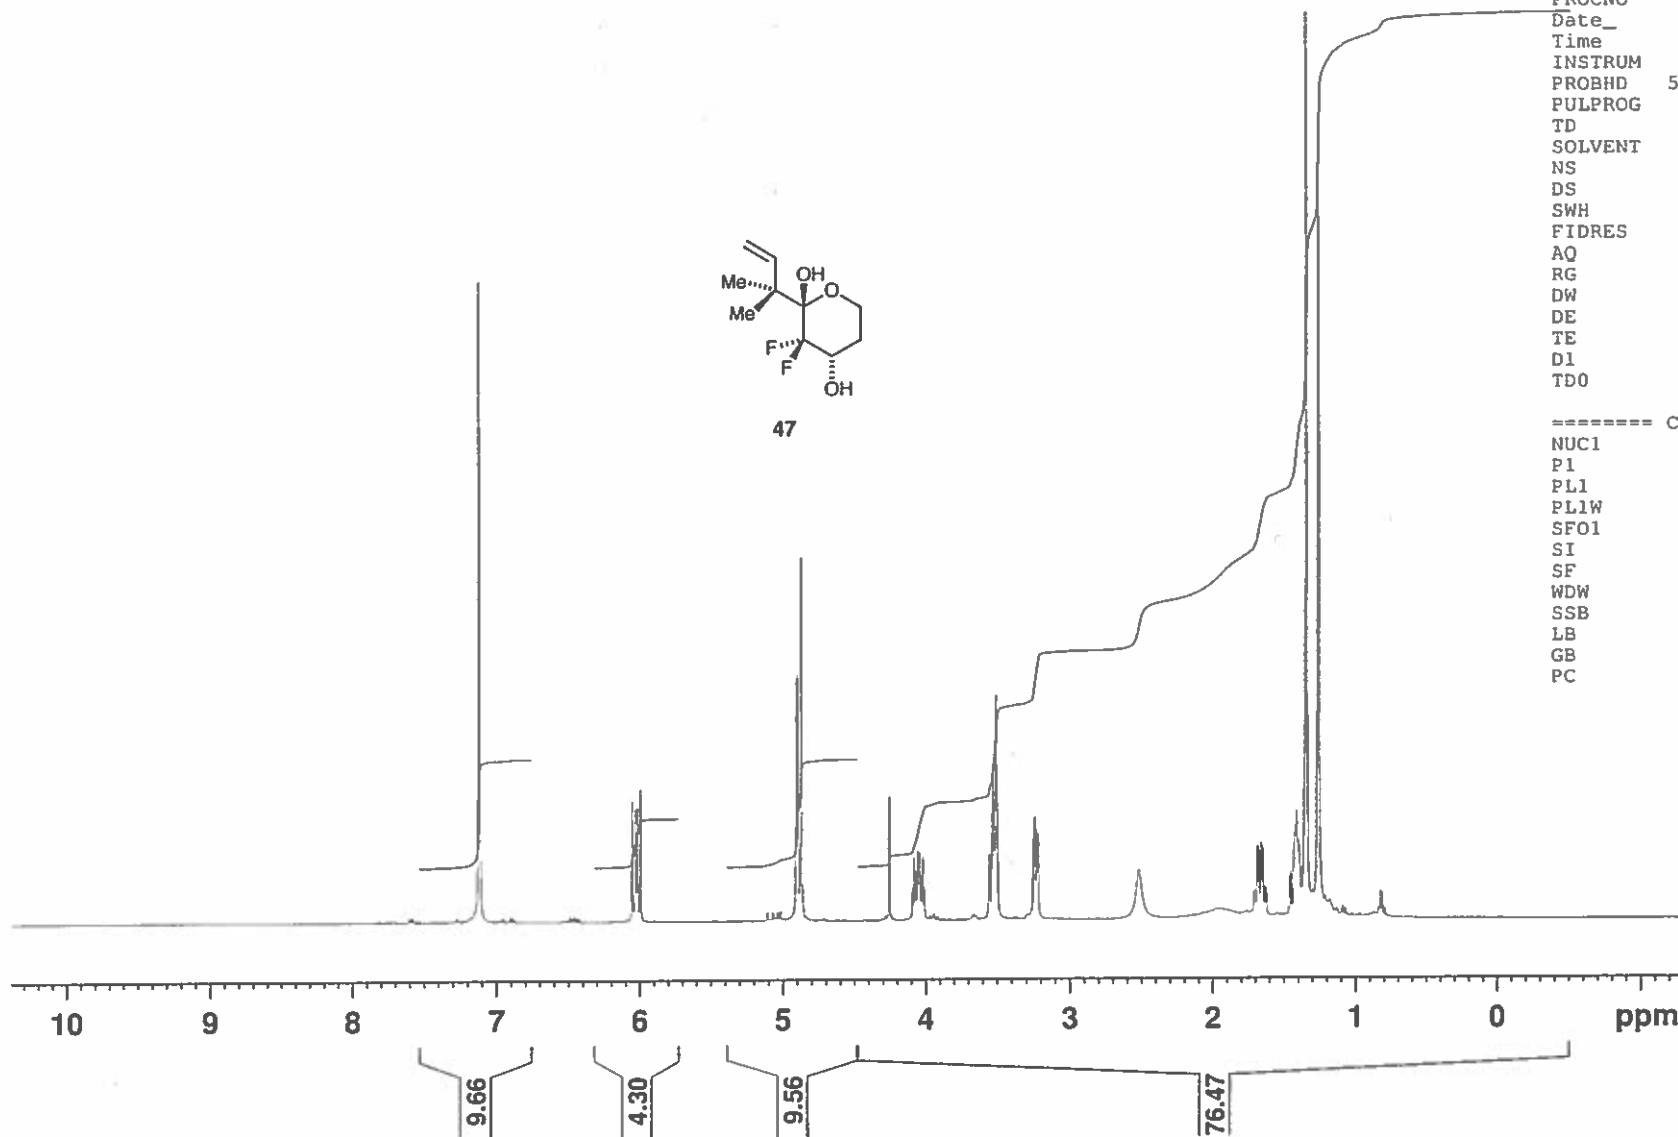

|                        |                                                                                                                                     |                   |                                                                                                       |                        |            |
|------------------------|-------------------------------------------------------------------------------------------------------------------------------------|-------------------|-------------------------------------------------------------------------------------------------------|------------------------|------------|
| Acquisition Time (sec) | 1.3631                                                                                                                              | Comment           | P Mears 0913-081 ejt-prm95 prod xtals mCARBON C6D6 (E:\bruk400service_data\2013\Sep) Administrator 13 |                        |            |
| Date                   | 20 Sep 2013 10:46:40                                                                                                                | Date Stamp        | 20 Sep 2013 10:46:40                                                                                  |                        |            |
| File Name              | \\ss7a.ds.man.ac.uk\vol5\vol3\users\snmrdata\bruk400service_data\2013\Sep\data\Administrator\nmr\2013-09-20-Administrator-13\11\fid |                   |                                                                                                       |                        |            |
| Frequency (MHz)        | 100.64                                                                                                                              | Nucleus           | 13C                                                                                                   | Number of Transients   | 6144       |
| Original Points Count  | 32768                                                                                                                               | Owner             | Administrator                                                                                         | Points Count           | 32768      |
| Receiver Gain          | 2050.00                                                                                                                             | SW(cyclical) (Hz) | 24038.46                                                                                              | Solvent                | BENZENE-d6 |
| Spectrum Type          | STANDARD                                                                                                                            | Sweep Width (Hz)  | 24037.73                                                                                              | Temperature (degree C) | 21.700     |
|                        |                                                                                                                                     |                   |                                                                                                       | Origin                 | AV400_S    |
|                        |                                                                                                                                     |                   |                                                                                                       | Pulse Sequence         | zgpg30     |
|                        |                                                                                                                                     |                   |                                                                                                       | Spectrum Offset (Hz)   | 10120.3975 |

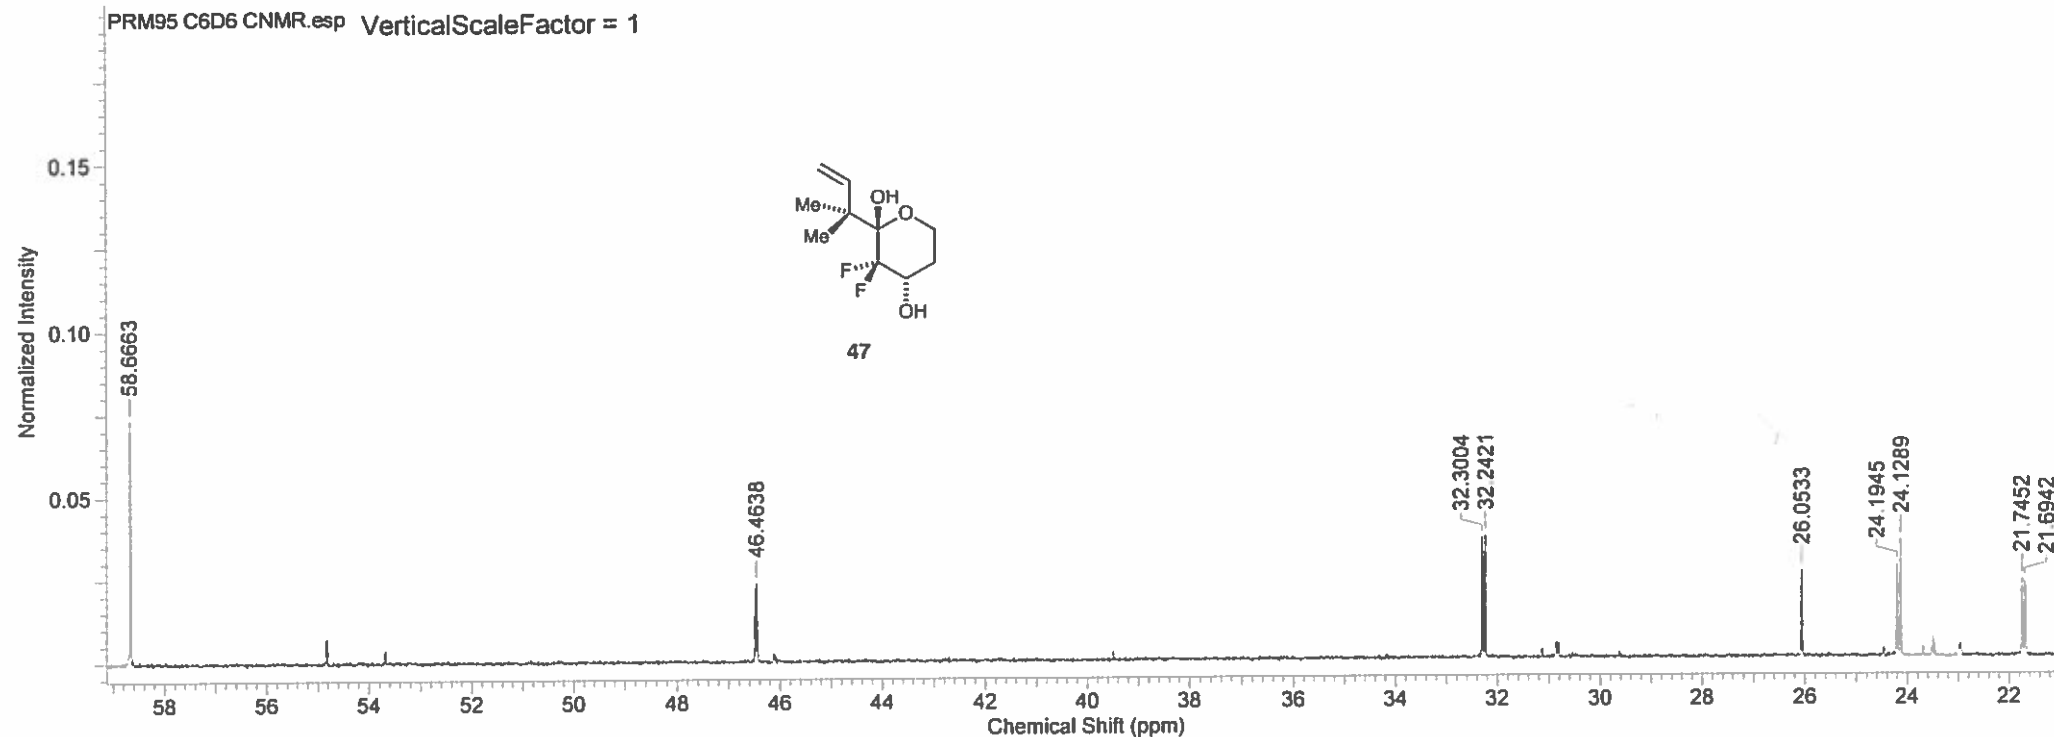

| No. | (ppm) | (Hz)   | Height |
|-----|-------|--------|--------|
| 1   | 21.69 | 2183.3 | 0.0226 |
| 2   | 21.75 | 2188.4 | 0.0232 |
| 3   | 24.13 | 2428.3 | 0.0351 |
| 4   | 24.19 | 2434.9 | 0.0275 |
| 5   | 26.05 | 2622.0 | 0.0258 |
| 6   | 32.24 | 3244.8 | 0.0365 |
| 7   | 32.30 | 3250.6 | 0.0363 |
| 8   | 46.46 | 4676.0 | 0.0235 |
| 9   | 58.67 | 5904.1 | 0.0736 |

|                        |                                                                                                                                    |                   |                                                                                                       |                        |            |                      |            |
|------------------------|------------------------------------------------------------------------------------------------------------------------------------|-------------------|-------------------------------------------------------------------------------------------------------|------------------------|------------|----------------------|------------|
| Acquisition Time (sec) | 1.3631                                                                                                                             | Comment           | P Mears 0913-081 ejt-prm95 prod xtals mCARBON C6D6 (E:\bruk400service_data\2013\Sep) Administrator 13 |                        |            |                      |            |
| Date                   | 20 Sep 2013 10:46:40                                                                                                               | Date Stamp        | 20 Sep 2013 10:46:40                                                                                  |                        |            |                      |            |
| File Name              | \\ss7a.ds.man.ac.uk\vol5\vol3\users\snmrdata\bruk400service_data\2013\Sep\data\Administrator\nmr\2013-09-20-Administrator-13\11Vid |                   |                                                                                                       |                        |            |                      |            |
| Frequency (MHz)        | 100.64                                                                                                                             | Nucleus           | 13C                                                                                                   | Number of Transients   | 6144       | Origin               | AV400_S    |
| Original Points Count  | 32768                                                                                                                              | Owner             | Administrator                                                                                         | Points Count           | 32768      | Pulse Sequence       | zgpg30     |
| Receiver Gain          | 2050.00                                                                                                                            | SW(cyclical) (Hz) | 24038.46                                                                                              | Solvent                | BENZENE-d6 | Spectrum Offset (Hz) | 10120.3975 |
| Spectrum Type          | STANDARD                                                                                                                           | Sweep Width (Hz)  | 24037.73                                                                                              | Temperature (degree C) | 21.700     |                      |            |

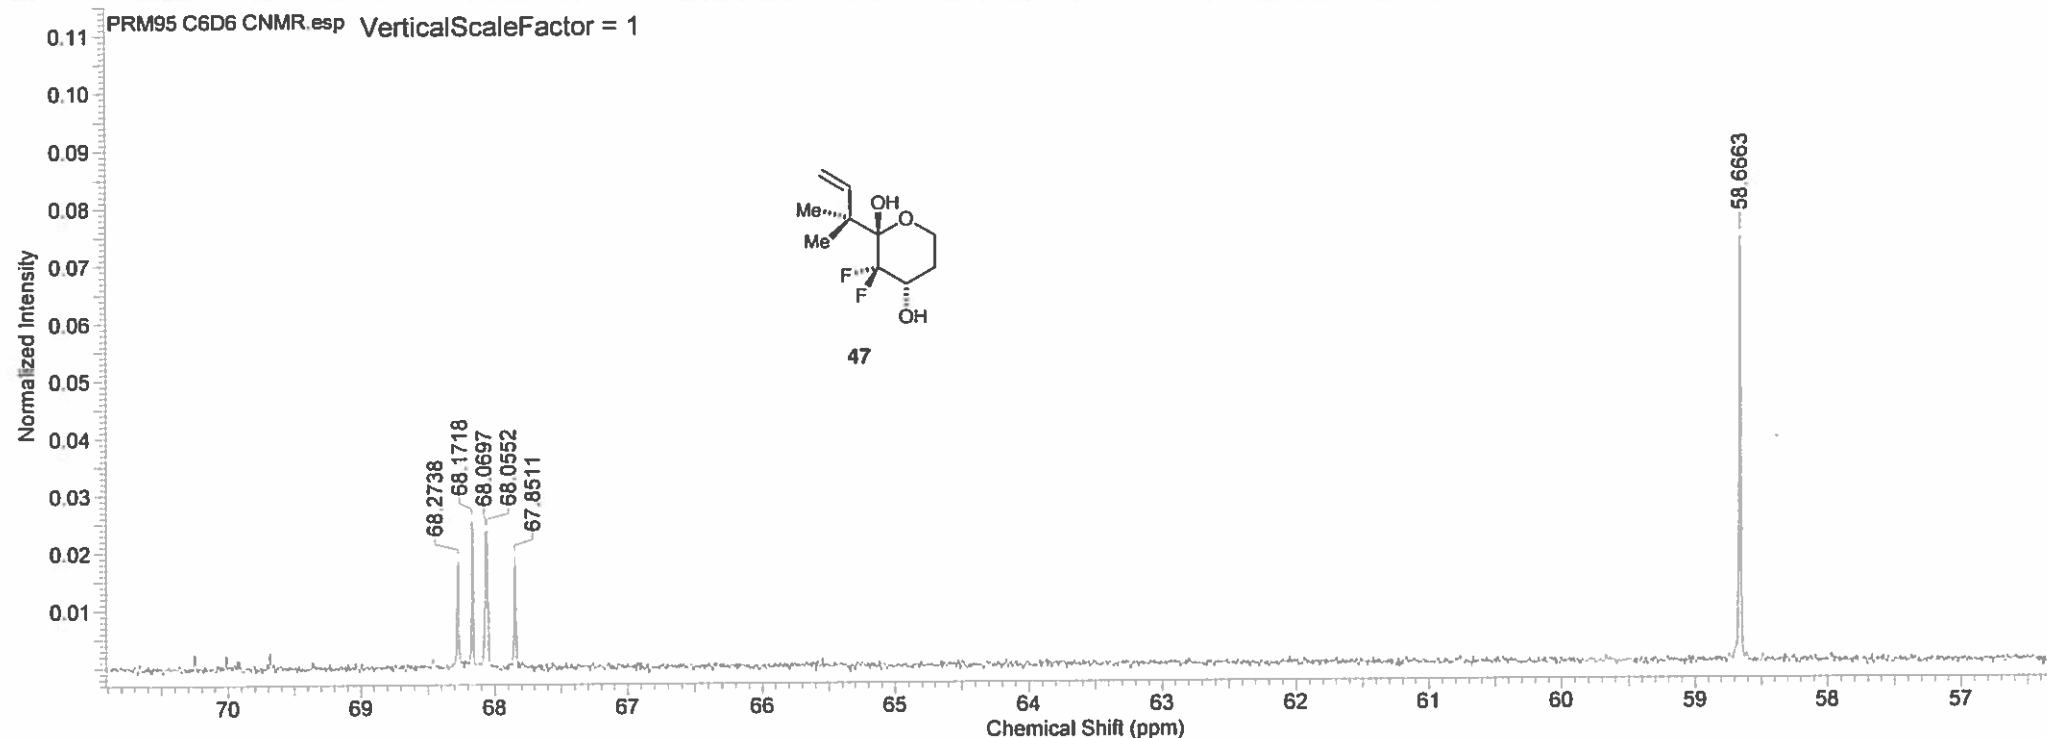

| No. | (ppm) | (Hz)   | Height |
|-----|-------|--------|--------|-----|-------|--------|--------|-----|-------|--------|--------|-----|-------|--------|--------|
| 1   | 21.69 | 2183.3 | 0.0226 | 4   | 24.19 | 2434.9 | 0.0275 | 7   | 32.30 | 3250.6 | 0.0363 | 10  | 67.85 | 6828.4 | 0.0191 |
| 2   | 21.75 | 2188.4 | 0.0232 | 5   | 26.05 | 2622.0 | 0.0258 | 8   | 46.46 | 4676.0 | 0.0235 | 11  | 68.06 | 6848.9 | 0.0237 |
| 3   | 24.13 | 2428.3 | 0.0351 | 6   | 32.24 | 3244.8 | 0.0365 | 9   | 58.67 | 5904.1 | 0.0736 | 12  | 68.07 | 6850.4 | 0.0235 |
|     |       |        |        |     |       |        |        |     |       |        |        | 13  | 68.17 | 6860.7 | 0.0255 |
|     |       |        |        |     |       |        |        |     |       |        |        | 14  | 68.27 | 6870.9 | 0.0183 |

|                        |                                                                                                                                     |                   |                                                                                                       |                        |            |                      |            |
|------------------------|-------------------------------------------------------------------------------------------------------------------------------------|-------------------|-------------------------------------------------------------------------------------------------------|------------------------|------------|----------------------|------------|
| Acquisition Time (sec) | 1.3631                                                                                                                              | Comment           | P Mears 0913-081 ejt-prm95 prod xtals mCARBON C6D6 (E:\bruk400service_data\2013\Sep) Administrator 13 |                        |            |                      |            |
| Date                   | 20 Sep 2013 10:46:40                                                                                                                | Date Stamp        | 20 Sep 2013 10:46:40                                                                                  |                        |            |                      |            |
| File Name              | \\ss7a.ds.man.ac.uk\vol5\vol3\users\snmrdata\bruk400service_data\2013\Sep\data\Administrator\nmr\2013-09-20-Administrator-13\11\fid |                   |                                                                                                       |                        |            |                      |            |
| Frequency (MHz)        | 100.64                                                                                                                              | Nucleus           | 13C                                                                                                   | Number of Transients   | 6144       | Origin               | AV400_S    |
| Original Points Count  | 32768                                                                                                                               | Owner             | Administrator                                                                                         | Points Count           | 32768      | Pulse Sequence       | zgpg30     |
| Receiver Gain          | 2050.00                                                                                                                             | SW(cyclical) (Hz) | 24038.46                                                                                              | Solvent                | BENZENE-d6 | Spectrum Offset (Hz) | 10120.3975 |
| Spectrum Type          | STANDARD                                                                                                                            | Sweep Width (Hz)  | 24037.73                                                                                              | Temperature (degree C) | 21.700     |                      |            |

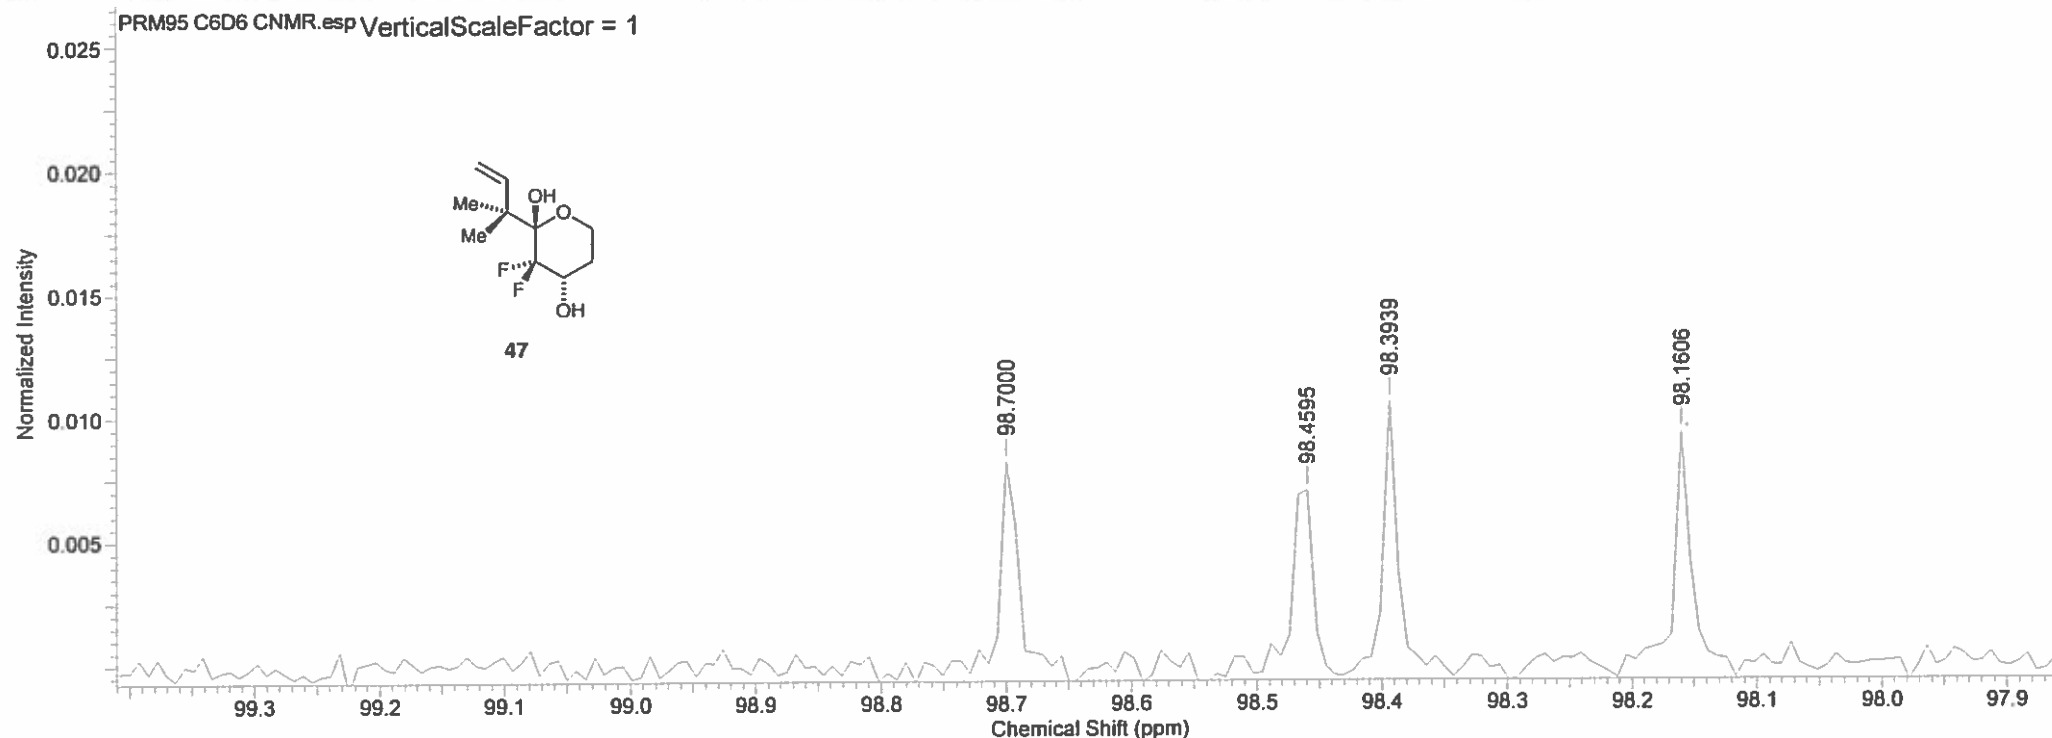

| No. | (ppm) | (Hz)   | Height |
|-----|-------|--------|--------|-----|-------|--------|--------|-----|-------|--------|--------|-----|-------|--------|--------|
| 1   | 21.69 | 2183.3 | 0.0226 | 5   | 26.05 | 2622.0 | 0.0258 | 9   | 58.67 | 5904.1 | 0.0736 | 13  | 68.17 | 6860.7 | 0.0255 |
| 2   | 21.75 | 2188.4 | 0.0232 | 6   | 32.24 | 3244.8 | 0.0365 | 10  | 67.85 | 6828.4 | 0.0191 | 14  | 68.27 | 6870.9 | 0.0183 |
| 3   | 24.13 | 2428.3 | 0.0351 | 7   | 32.30 | 3250.6 | 0.0363 | 11  | 68.06 | 6848.9 | 0.0237 | 15  | 98.16 | 9878.7 | 0.0092 |
| 4   | 24.19 | 2434.9 | 0.0275 | 8   | 46.46 | 4676.0 | 0.0235 | 12  | 68.07 | 6850.4 | 0.0235 | 16  | 98.39 | 9902.2 | 0.0105 |
|     |       |        |        |     |       |        |        |     |       |        |        | 17  | 98.46 | 9908.8 | 0.0069 |
|     |       |        |        |     |       |        |        |     |       |        |        | 18  | 98.70 | 9933.0 | 0.0081 |

|                        |                                                                                                                                    |                   |                                                                                                      |                        |            |
|------------------------|------------------------------------------------------------------------------------------------------------------------------------|-------------------|------------------------------------------------------------------------------------------------------|------------------------|------------|
| Acquisition Time (sec) | 1.3631                                                                                                                             | Comment           | P Mears 0913-081 ejl-pm95 prod xtals mCARBON C6D6 (E:\bruk400service_data\2013\Sep) Administrator 13 |                        |            |
| Date                   | 20 Sep 2013 10:46:40                                                                                                               | Date Stamp        | 20 Sep 2013 10:46:40                                                                                 |                        |            |
| File Name              | \\ss7a.ds.man.ac.uk\vol5\vol3\users\snmrdata\bruk400service_data\2013\Sep\data\Administrator\nmr\2013-09-20-Administrator-13\11Vid |                   |                                                                                                      |                        |            |
| Frequency (MHz)        | 100.64                                                                                                                             | Nucleus           | 13C                                                                                                  | Number of Transients   | 6144       |
| Original Points Count  | 32768                                                                                                                              | Owner             | Administrator                                                                                        | Points Count           | 32768      |
| Receiver Gain          | 2050.00                                                                                                                            | SW(cyclical) (Hz) | 24038.46                                                                                             | Solvent                | BENZENE-d6 |
| Spectrum Type          | STANDARD                                                                                                                           | Sweep Width (Hz)  | 24037.73                                                                                             | Temperature (degree C) | 21.700     |
|                        |                                                                                                                                    |                   |                                                                                                      | Origin                 | AV400 S    |
|                        |                                                                                                                                    |                   |                                                                                                      | Pulse Sequence         | zgpg30     |
|                        |                                                                                                                                    |                   |                                                                                                      | Spectrum Offset (Hz)   | 10120.3975 |

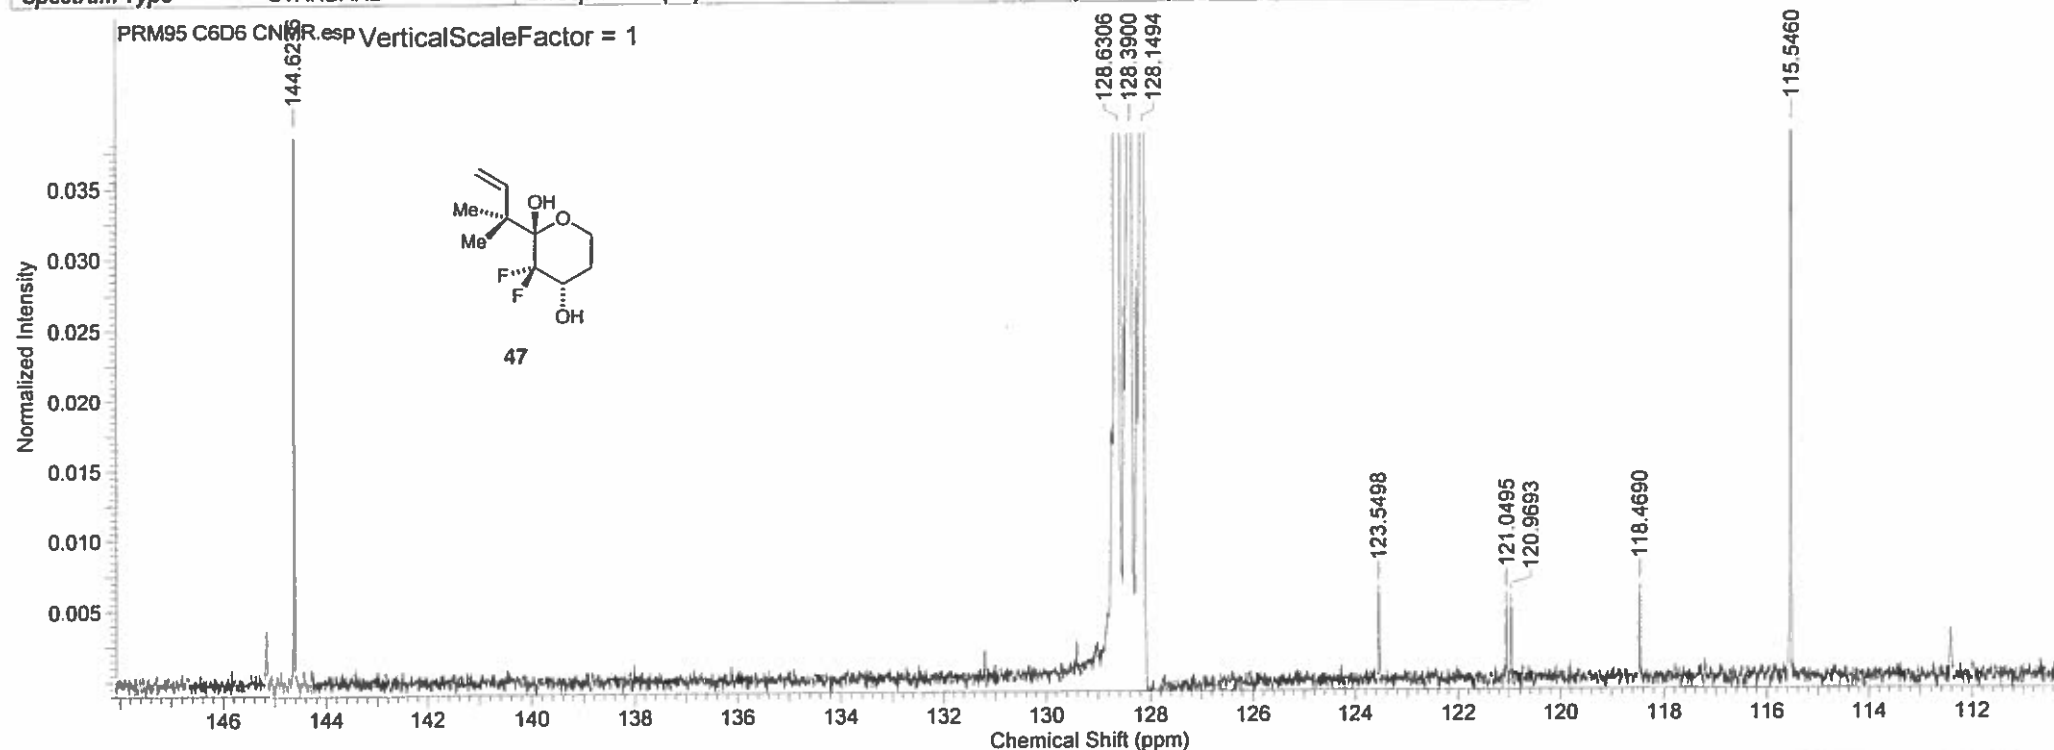

| No. | (ppm) | (Hz)   | Height | No. | (ppm) | (Hz)   | Height | No. | (ppm) | (Hz)   | Height | No. | (ppm)  | (Hz)    | Height | No. | (ppm)  | (Hz)    | Height |
|-----|-------|--------|--------|-----|-------|--------|--------|-----|-------|--------|--------|-----|--------|---------|--------|-----|--------|---------|--------|
| 1   | 21.69 | 2183.3 | 0.0226 | 7   | 32.30 | 3250.6 | 0.0363 | 13  | 68.17 | 6860.7 | 0.0255 | 19  | 115.55 | 11628.3 | 0.0593 | 25  | 128.27 | 12909.2 | 0.0277 |
| 2   | 21.75 | 2188.4 | 0.0232 | 8   | 46.46 | 4676.0 | 0.0235 | 14  | 68.27 | 6870.9 | 0.0183 | 20  | 118.47 | 11922.5 | 0.0063 | 26  | 128.39 | 12920.9 | 1.0000 |
| 3   | 24.13 | 2428.3 | 0.0351 | 9   | 58.67 | 5904.1 | 0.0736 | 15  | 98.16 | 9878.7 | 0.0092 | 21  | 120.97 | 12174.1 | 0.0056 | 27  | 128.51 | 12932.6 | 0.0251 |
| 4   | 24.19 | 2434.9 | 0.0275 | 10  | 67.85 | 6828.4 | 0.0191 | 16  | 98.39 | 9902.2 | 0.0105 | 22  | 121.05 | 12182.2 | 0.0058 | 28  | 128.63 | 12945.1 | 0.9899 |
| 5   | 26.05 | 2622.0 | 0.0258 | 11  | 68.06 | 6848.9 | 0.0237 | 17  | 98.46 | 9908.8 | 0.0069 | 23  | 123.55 | 12433.8 | 0.0063 | 29  | 144.62 | 14554.6 | 0.0523 |
| 6   | 32.24 | 3244.8 | 0.0365 | 12  | 68.07 | 6850.4 | 0.0235 | 18  | 98.70 | 9933.0 | 0.0081 | 24  | 128.15 | 12896.7 | 0.9879 |     |        |         |        |

|                        |                                                                                                                            |                   |                                                                                |                        |            |                      |             |
|------------------------|----------------------------------------------------------------------------------------------------------------------------|-------------------|--------------------------------------------------------------------------------|------------------------|------------|----------------------|-------------|
| Acquisition Time (sec) | 0.5767                                                                                                                     | Comment           | EJT-PRM95 Product data m19FCPD C6D6 /op/oldbruk500data.11vii11/2013/Sep ejl 11 |                        |            |                      |             |
| Date                   | 20 Sep 2013 10:40:16                                                                                                       | Date Stamp        | 20 Sep 2013 10:40:16                                                           |                        |            |                      |             |
| File Name              | \\ss7a.ds.man.ac.uk\vol5\VOL3\USERS\SNMRDATA\BRUK500DATA\BRUK500DATA\2013\SEP\DATA\EJT\NMR\2013-09-20-EJT-11\12\PDATA\111R |                   |                                                                                |                        |            |                      |             |
| Frequency (MHz)        | 470.59                                                                                                                     | Nucleus           | 19F                                                                            | Number of Transients   | 16         | Origin               | spect       |
| Original Points Count  | 65536                                                                                                                      | Owner             | nmr1                                                                           | Points Count           | 65536      | Pulse Sequence       | zgfhiggn    |
| Receiver Gain          | 32.00                                                                                                                      | SW(cyclical) (Hz) | 113636.37                                                                      | Solvent                | BENZENE-d6 | Spectrum Offset (Hz) | -47059.0234 |
| Spectrum Type          | STANDARD                                                                                                                   | Sweep Width (Hz)  | 113634.63                                                                      | Temperature (degree C) | 27.000     |                      |             |

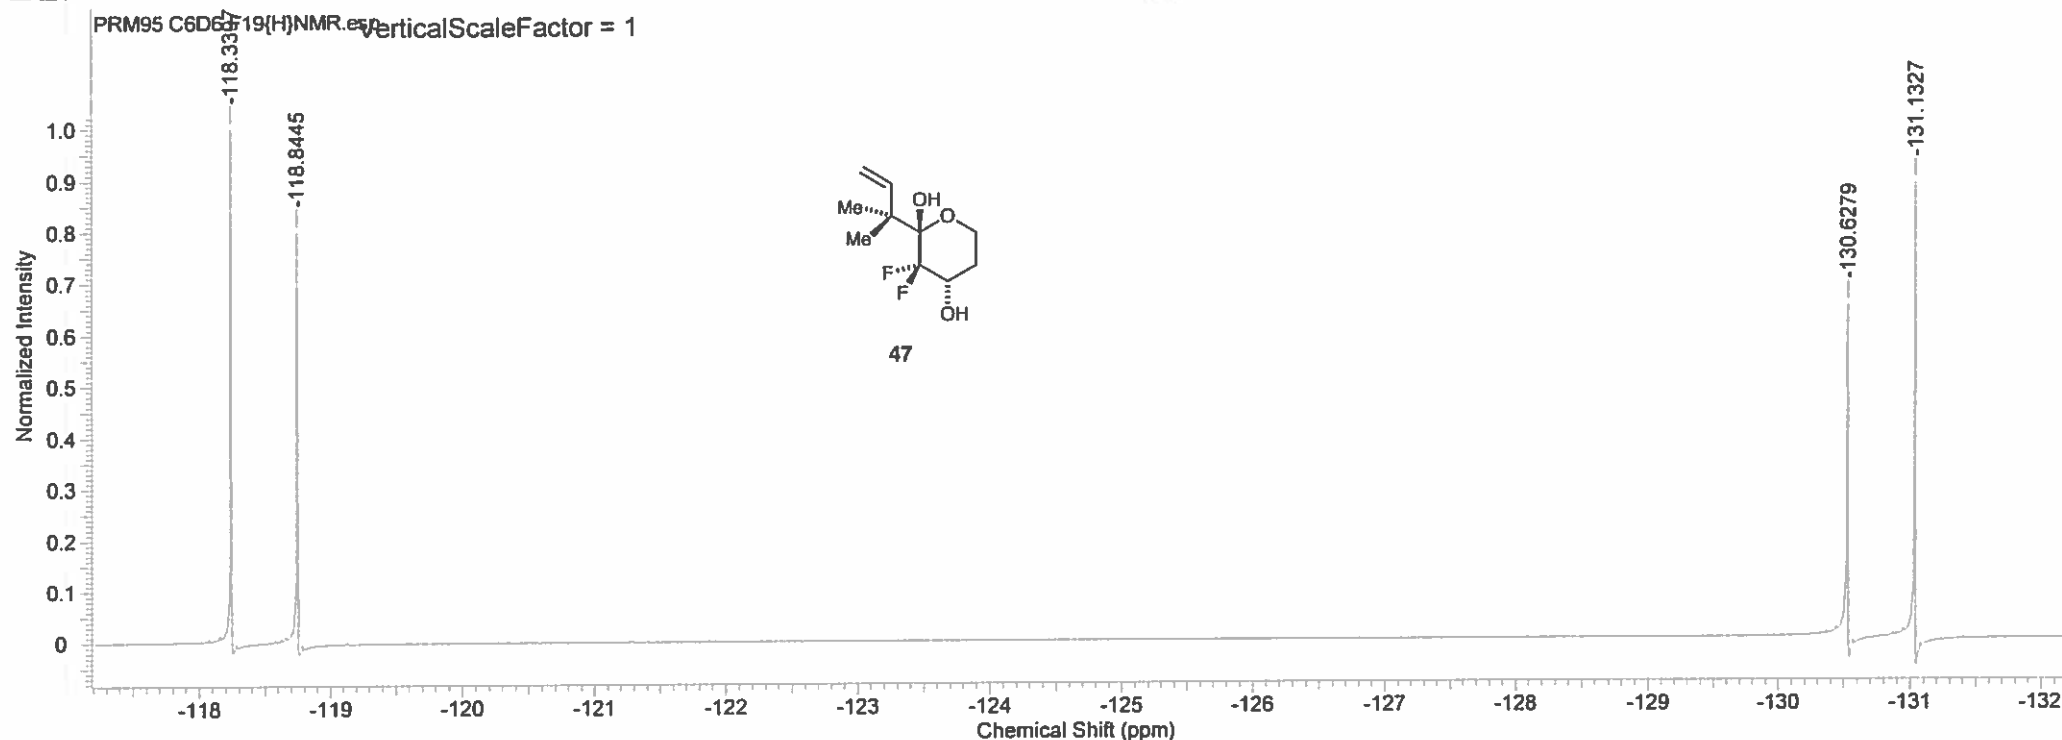

EJT-PRM95 prod crystals over weekend equilibrated  
mPROTON C6D6 {e:\bruk400data\2013\Sep} ejt 37

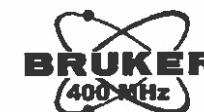

NAME 2013-09-23-ejt-37  
EXPNO 10  
PROCNO 1  
Date\_ 20130923  
Time 11.40  
INSTRUM AV400  
PROBHD 5 mm PABBO BB-  
PULPROG zg30b  
TD 65536  
SOLVENT C6D6  
NS 16  
DS 0  
SWH 8264.463 Hz  
FIDRES 0.126106 Hz  
AQ 3.9649780 sec  
RG 101  
DW 60.500 usec  
DE 8.45 usec  
TE 295.1 K  
D1 1.00000000 sec  
TD0 1

===== CHANNEL f1 =====  
NUC1 1H  
P1 14.50 usec  
PL1 -3.60 dB  
PL1W 17.83863831 W  
SFO1 400.1324710 MHz  
SI 32768  
SF 400.1300000 MHz  
WDW EM  
SSB 0  
LB 0.30 Hz  
GB 0  
PC 1.00

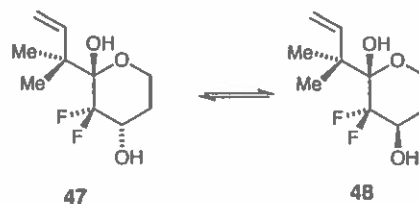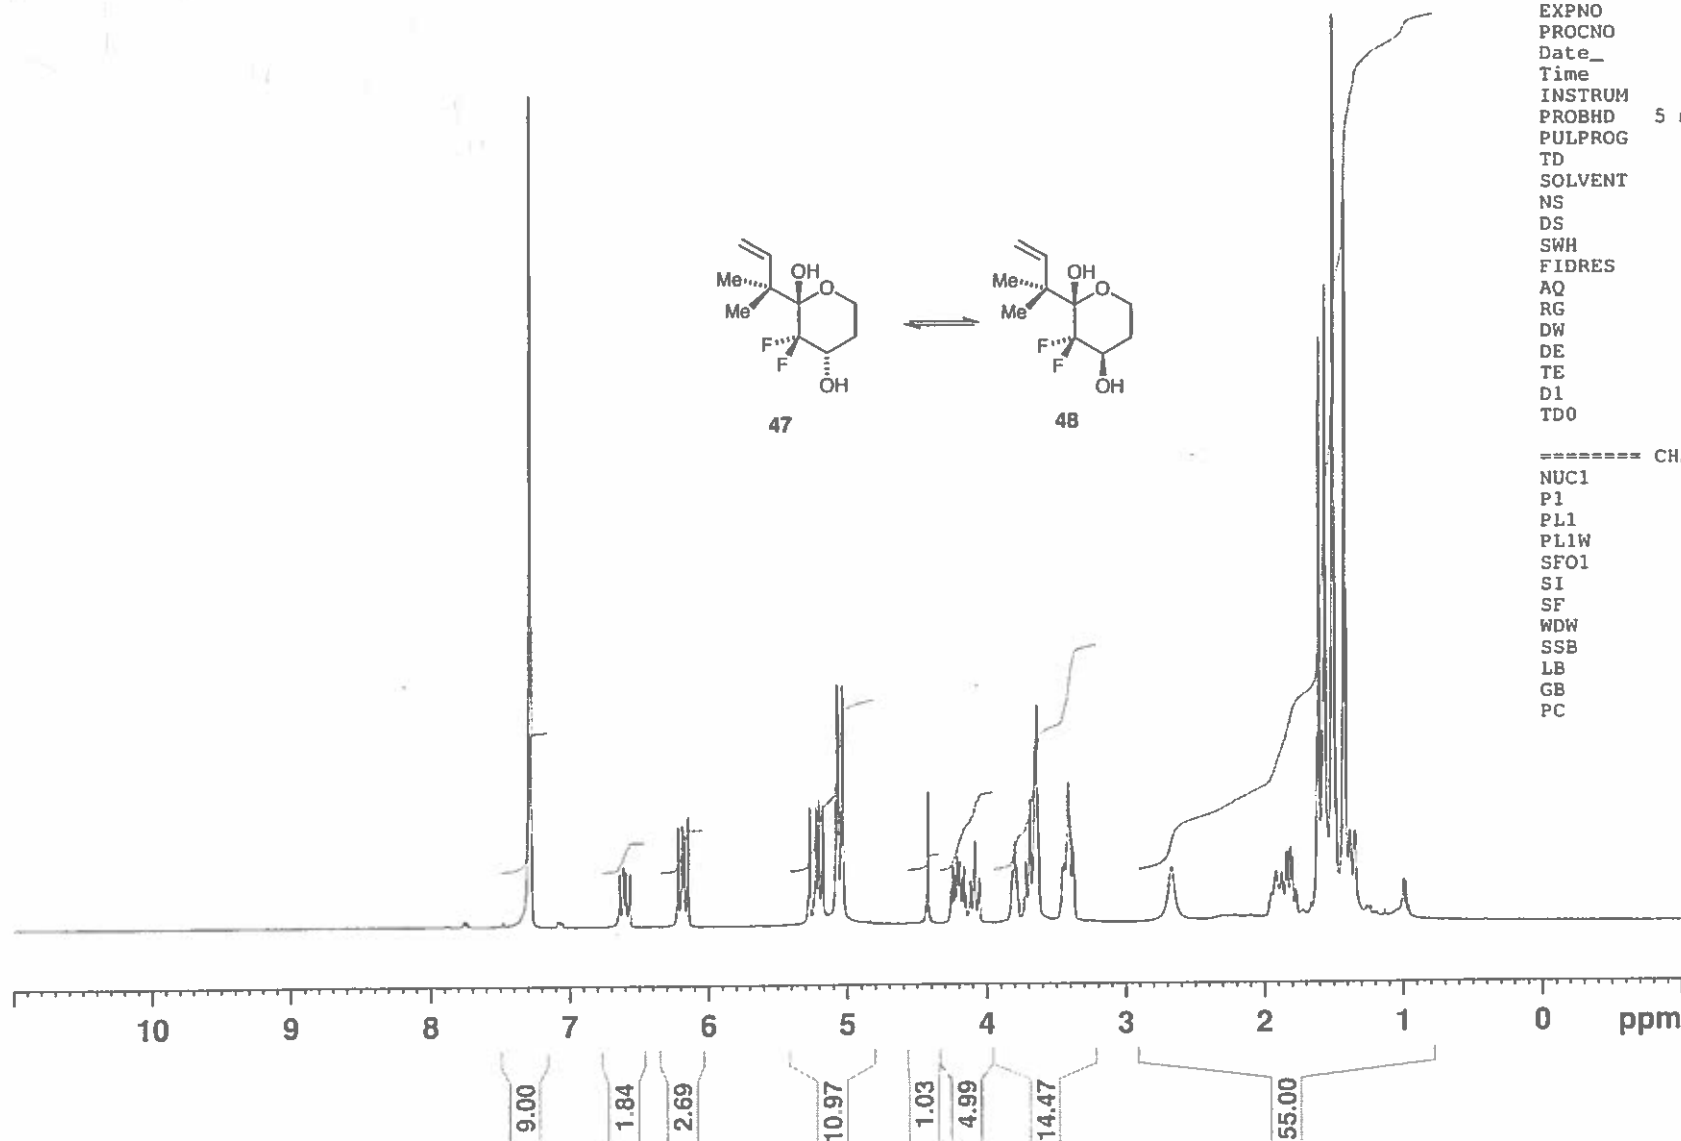



This report was created by ACD/NMR Processor Academic Edition. For more information go to [www.acdlabs.com/nmrproc/](http://www.acdlabs.com/nmrproc/)

This report was created by ACD/NMR Processor Academic Edition. For more information go to [www.accdirect.com/nmrprod](http://www.accdirect.com/nmrprod)

|                        |                                                                                                          |                        |                                                                                                 |                      |             |                       |          |
|------------------------|----------------------------------------------------------------------------------------------------------|------------------------|-------------------------------------------------------------------------------------------------|----------------------|-------------|-----------------------|----------|
| Acquisition Time (sec) | 0.7340                                                                                                   | Comment                | EJT-PRM95 prod crystals over weekend equilibrated mF19CPD C6D6 (e:\bruk400data\2013\Sep) ejt 37 |                      |             |                       |          |
| Date                   | 23 Sep 2013 11:42:08                                                                                     | Date Stamp             | 23 Sep 2013 11:42:08                                                                            |                      |             |                       |          |
| File Name              | \\ss7a.ds.man.ac.uk\vol5\vol3\users\snmr\data\bruk400data\2013\Sep\data\ejt\nmr\2013-09-23-ejt-37\11\fid |                        |                                                                                                 |                      |             | Frequency (MHz)       | 376.50   |
| Nucleus                | 19F                                                                                                      | Number of Transients   | 16                                                                                              | Origin               | AV400       | Original Points Count | 65536    |
| Owner                  | Administrator                                                                                            | Points Count           | 65536                                                                                           | Pulse Sequence       | zgig        | Receiver Gain         | 4100.00  |
| SW(cyclical) (Hz)      | 89285.71                                                                                                 | Solvent                | BENZENE-d6                                                                                      | Spectrum Offset (Hz) | -37649.5977 | Spectrum Type         | STANDARD |
| Sweep Width (Hz)       | 89284.35                                                                                                 | Temperature (degree C) | 22.300                                                                                          |                      |             |                       |          |

PRM95 equilibrated mixture-F19-C6D6-25F VerticalScaleFactor = 1

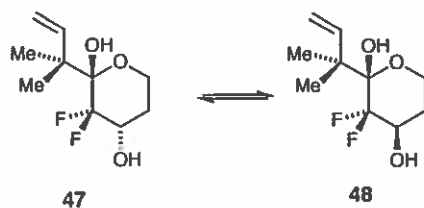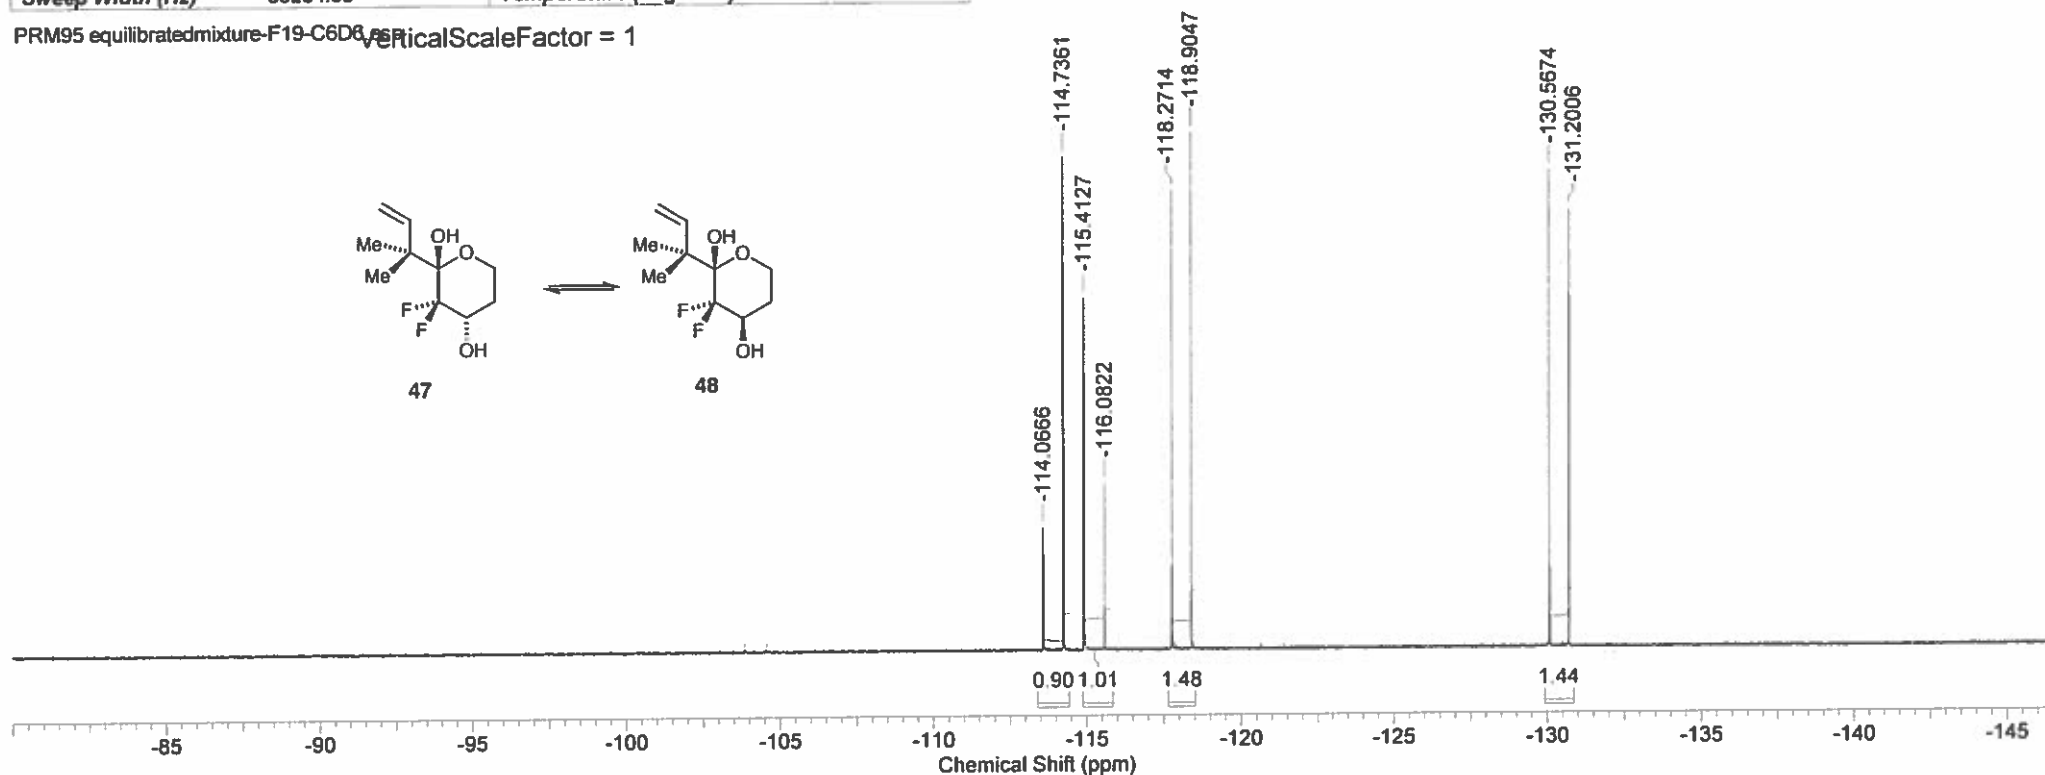

| No. | (ppm)                  | Value         | Absolute Value | Non-Negative Value |
|-----|------------------------|---------------|----------------|--------------------|
| 1   | 3493 .. -1301.44295704 | 2.36217000e+7 | 1.44295704     |                    |
| 2   | 0336 .. -1161.48149800 | 2.42526280e+7 | 1.48149800     |                    |
| 3   | 2540 .. -1151.00809872 | 1.65029200e+7 | 1.00809872     |                    |
| 4   | 9284 .. -1130.89820582 | 1.47039360e+7 | 0.89820582     |                    |

EJT-PRM115 product data allylic alcohol  
mPROTONnight CDCl3 /opt/oldbruk500data.11vii11/2014/Jan ejt 3

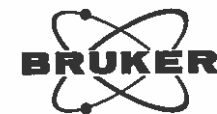

NAME 2014-01-12-ejt-3  
EXPNO 11  
PROCNO 1  
Date\_ 20140112  
Time 17.54  
INSTRUM spect  
PROBHD 5 mm PABBO BB-  
PULPROG zg30b  
TD 65536  
SOLVENT CDCl3  
NS 16  
DS 0  
SWH 10330.578 Hz  
FIDRES 0.157632 Hz  
AQ 3.1719923 sec  
RG 16  
DW 48.400 usec  
DE 13.00 usec  
TE 300.0 K  
D1 1.00000000 sec  
TD0 1

===== CHANNEL f1 =====  
NUC1 1H  
P1 10.00 usec  
PL1 -0.10 dB  
PL1W 26.21803665 W  
SF01 500.1330885 MHz  
SI 32768  
SF 500.1300437 MHz  
WDW EM  
SSB 0  
LB 0.30 Hz  
GB 0  
PC 1.00

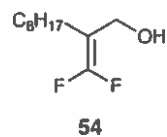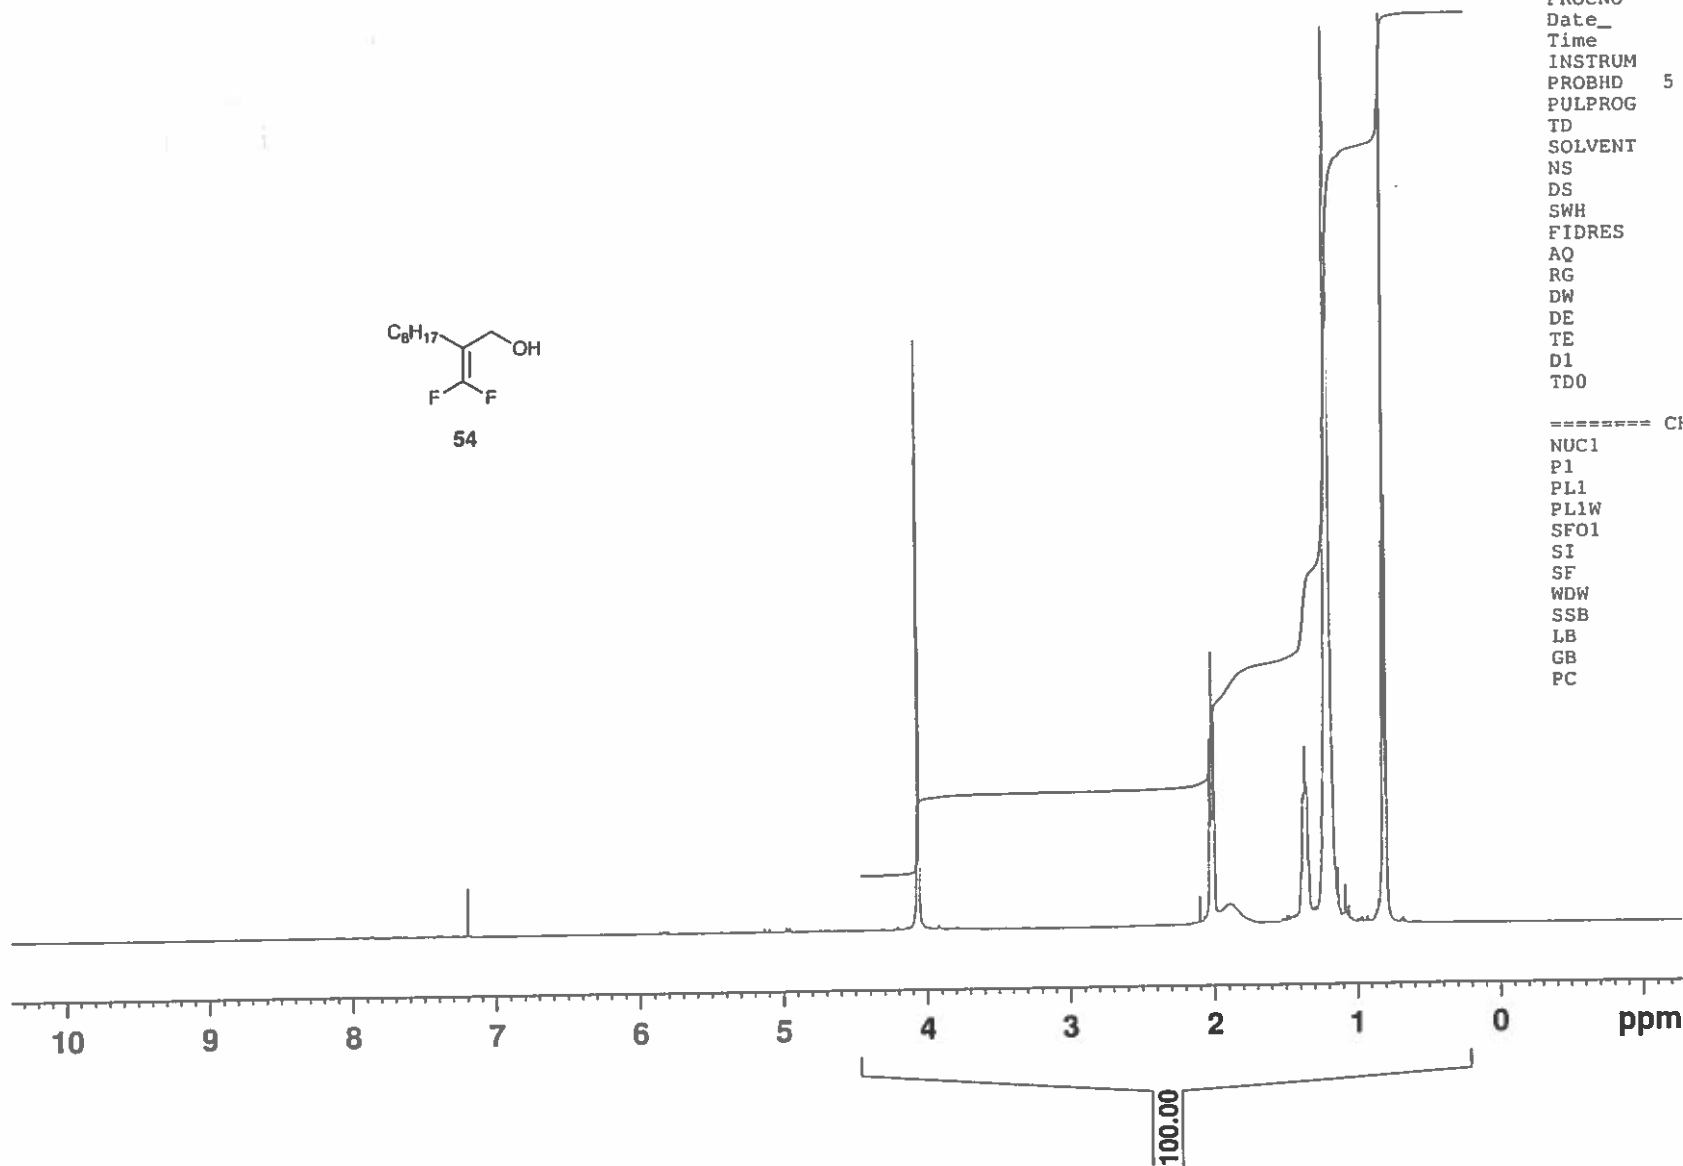

|                        |                                                                                                                         |                   |                                                                                                       |                        |              |                                 |
|------------------------|-------------------------------------------------------------------------------------------------------------------------|-------------------|-------------------------------------------------------------------------------------------------------|------------------------|--------------|---------------------------------|
| Acquisition Time (sec) | 1.1010                                                                                                                  | Comment           | EJT-PRM115 product data allylic alcohol mCARBONnight CDCl3 /opt/oldbruk500data.11vii11/2014/Jan ejt 3 |                        |              |                                 |
| Date                   | 12 Jan 2014 17:50:56                                                                                                    | Date Stamp        | 12 Jan 2014 17:50:56                                                                                  |                        |              |                                 |
| File Name              | \\ss7a.ds.man.ac.uk\vol5\VOL3\USERS\SNMRDATA\BRUK500DATA\BRUK500DATA\2014\JANDATA\EJTNMR\2014-01-12-EJT-3\10\PDATA\111R |                   |                                                                                                       |                        |              |                                 |
| Frequency (MHz)        | 125.76                                                                                                                  | Nucleus           | 13C                                                                                                   | Number of Transients   | 3072         | Origin spect                    |
| Original Points Count  | 32768                                                                                                                   | Owner             | vnmr1                                                                                                 | Points Count           | 32768        | Pulse Sequence zgpg30           |
| Receiver Gain          | 512.00                                                                                                                  | SW(cyclical) (Hz) | 29761.90                                                                                              | Solvent                | CHLOROFORM-d | Spectrum Offset (Hz) 12571.1670 |
| Spectrum Type          | STANDARD                                                                                                                | Sweep Width (Hz)  | 29761.00                                                                                              | Temperature (degree C) | 20.099       |                                 |

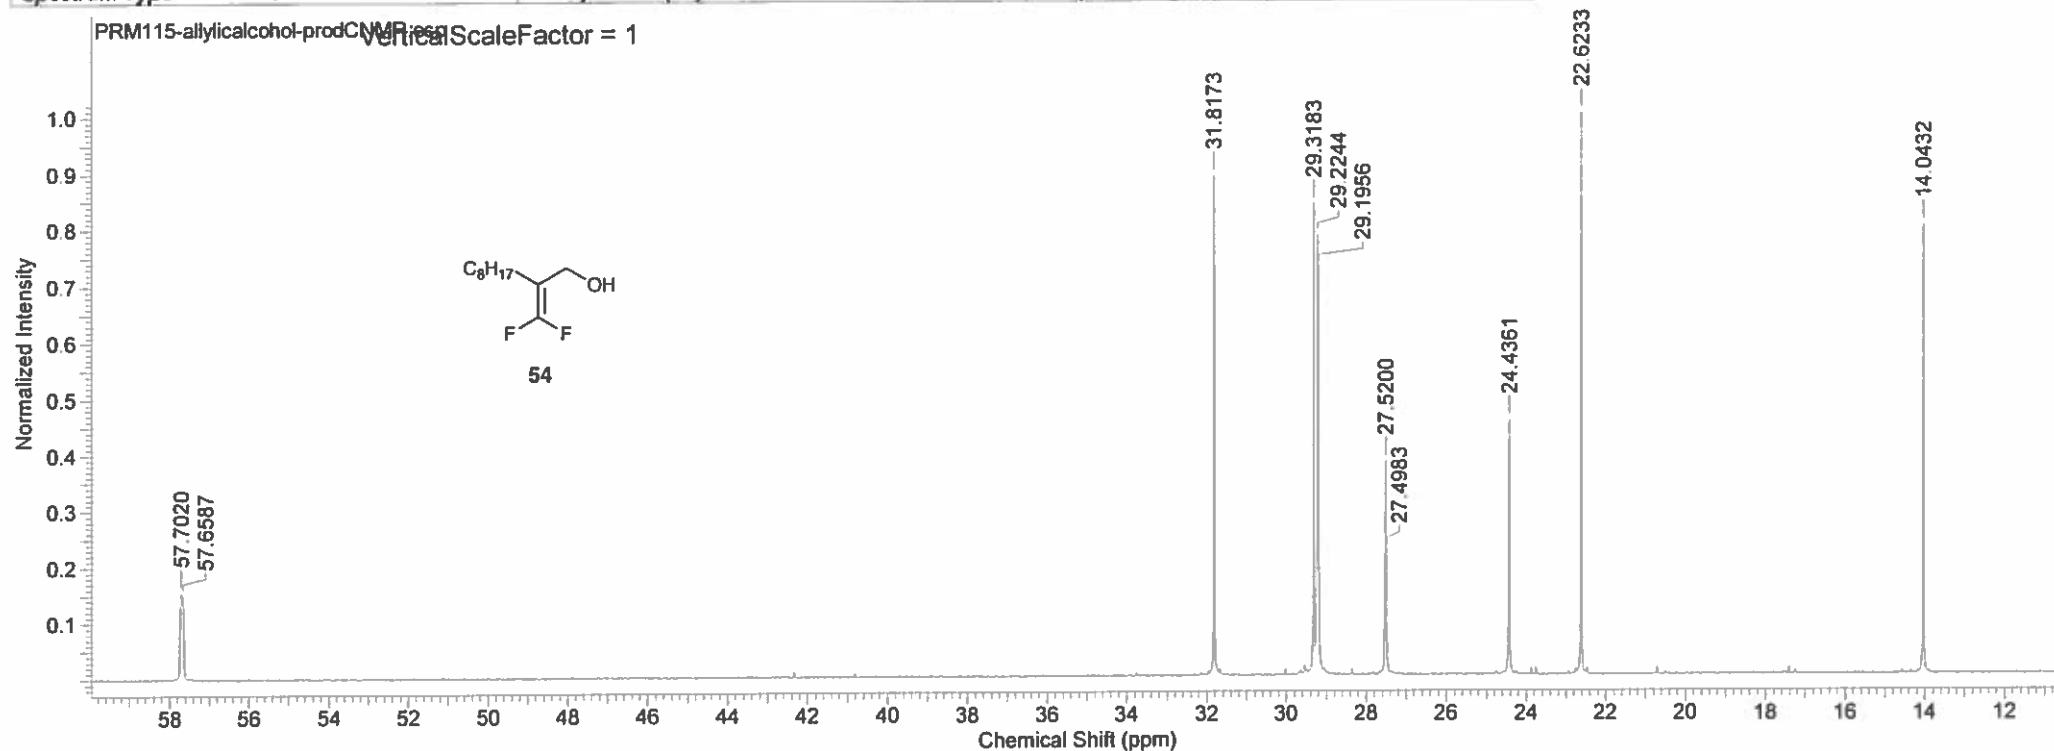

| No. | (ppm) | (Hz)   | Height |
|-----|-------|--------|--------|-----|-------|--------|--------|-----|-------|--------|--------|-----|-------|--------|--------|
| 1   | 14.04 | 1766.0 | 0.7988 | 4   | 27.50 | 3458.1 | 0.2238 | 7   | 29.22 | 3675.2 | 0.7842 | 10  | 57.66 | 7251.0 | 0.1504 |
| 2   | 22.62 | 2845.1 | 1.0000 | 5   | 27.52 | 3460.9 | 0.3816 | 8   | 29.32 | 3687.0 | 0.8407 | 11  | 57.70 | 7256.5 | 0.1568 |
| 3   | 24.44 | 3073.0 | 0.4542 | 6   | 29.20 | 3671.6 | 0.7282 | 9   | 31.82 | 4001.3 | 0.8907 |     |       |        |        |

|                        |                                                                                                                           |                   |                                                                                                      |                        |              |                      |            |
|------------------------|---------------------------------------------------------------------------------------------------------------------------|-------------------|------------------------------------------------------------------------------------------------------|------------------------|--------------|----------------------|------------|
| Acquisition Time (sec) | 1.1010                                                                                                                    | Comment           | EJT-PRM115 product data allylic alcohol mCARBONnight CDCl3 /opt/oldbruk500data.11vii1/2014/Jan ejt 3 |                        |              |                      |            |
| Date                   | 12 Jan 2014 17:50:56                                                                                                      | Date Stamp        | 12 Jan 2014 17:50:56                                                                                 |                        |              |                      |            |
| File Name              | \\ss7a.ds.man.ac.uk\vol5\VOL3\USERS\SNMRDATA\BRUK500DATA\BRUK500DATA\2014\JAN\DATA\EJT\NMR\2014-01-12-EJT-3\10\PDATA\111R |                   |                                                                                                      |                        |              |                      |            |
| Frequency (MHz)        | 125.76                                                                                                                    | Nucleus           | 13C                                                                                                  | Number of Transients   | 3072         | Origin               | spect      |
| Original Points Count  | 32768                                                                                                                     | Owner             | vnmr1                                                                                                | Points Count           | 32768        | Pulse Sequence       | zgpg30     |
| Receiver Gain          | 512.00                                                                                                                    | SW(cyclical) (Hz) | 29761.90                                                                                             | Solvent                | CHLOROFORM-d | Spectrum Offset (Hz) | 12571.1670 |
| Spectrum Type          | STANDARD                                                                                                                  | Sweep Width (Hz)  | 29761.00                                                                                             | Temperature (degree C) | 20.099       |                      |            |

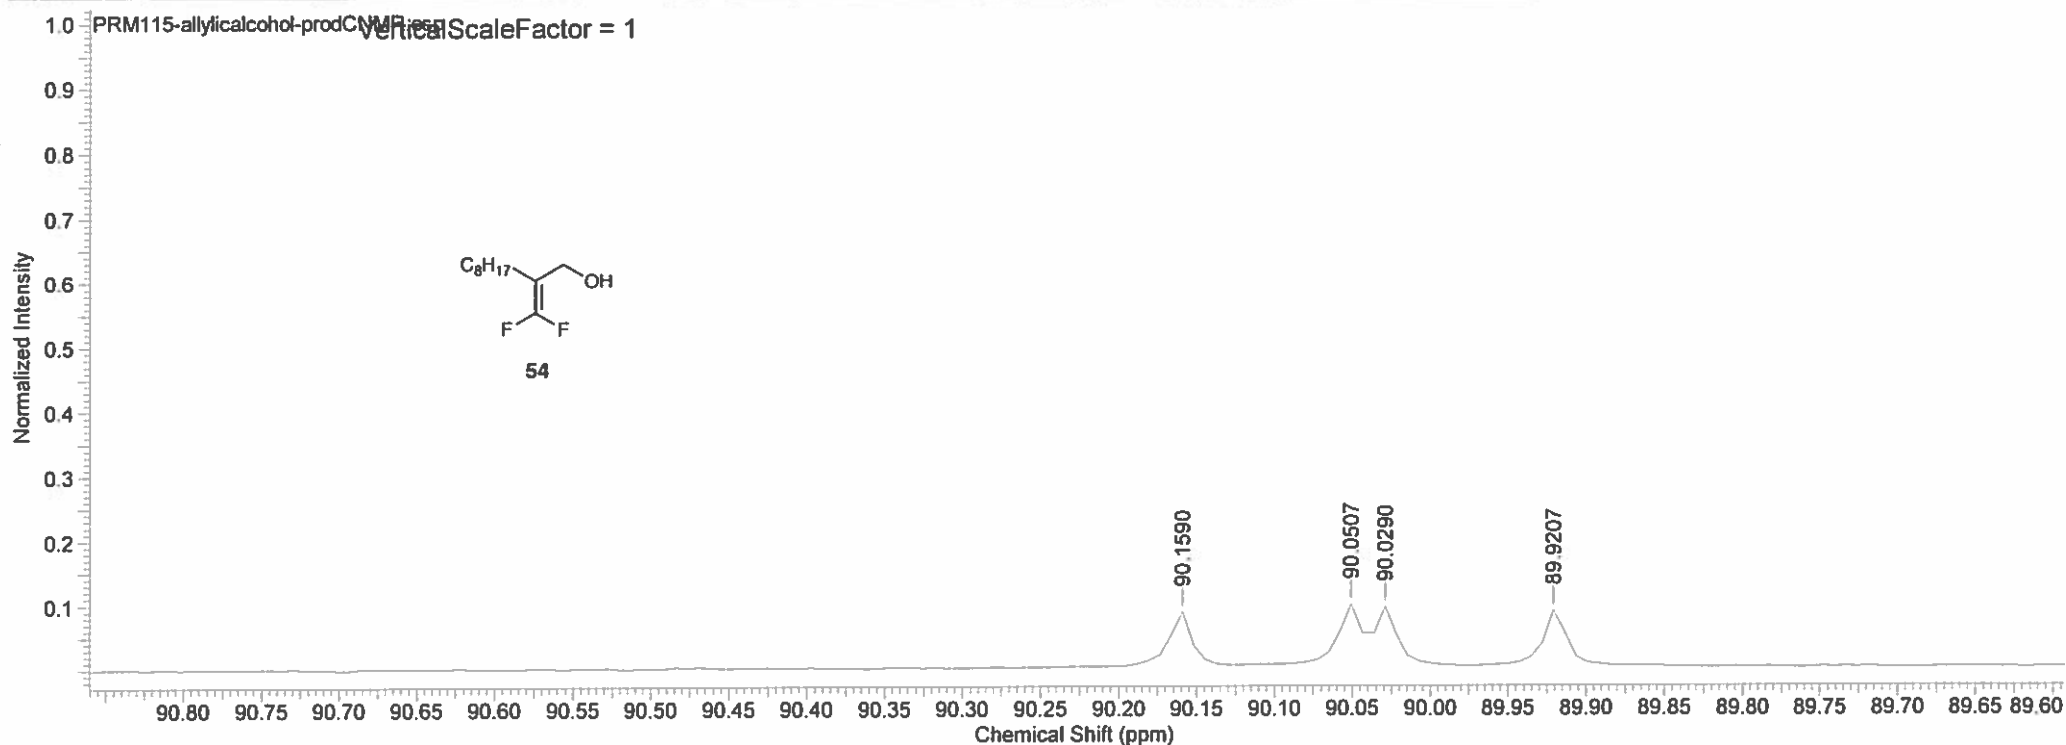

| No. | (ppm) | (Hz)   | Height | No. | (ppm) | (Hz)   | Height | No. | (ppm) | (Hz)   | Height | No. | (ppm) | (Hz)    | Height |
|-----|-------|--------|--------|-----|-------|--------|--------|-----|-------|--------|--------|-----|-------|---------|--------|
| 1   | 14.04 | 1766.0 | 0.7988 | 4   | 27.50 | 3458.1 | 0.2238 | 7   | 29.22 | 3675.2 | 0.7842 | 10  | 57.66 | 7251.0  | 0.1504 |
| 2   | 22.62 | 2845.1 | 1.0000 | 5   | 27.52 | 3460.9 | 0.3816 | 8   | 29.32 | 3687.0 | 0.8407 | 11  | 57.70 | 7256.5  | 0.1568 |
| 3   | 24.44 | 3073.0 | 0.4542 | 6   | 29.20 | 3671.6 | 0.7282 | 9   | 31.82 | 4001.3 | 0.8907 | 12  | 89.92 | 11308.2 | 0.0872 |
|     |       |        |        |     |       |        |        |     |       |        |        | 13  | 90.03 | 11321.9 | 0.0938 |
|     |       |        |        |     |       |        |        |     |       |        |        | 14  | 90.05 | 11324.6 | 0.0980 |
|     |       |        |        |     |       |        |        |     |       |        |        | 15  | 90.16 | 11338.2 | 0.0866 |

|                        |                                                                                                                          |                   |                                                                                                      |                        |              |                      |            |
|------------------------|--------------------------------------------------------------------------------------------------------------------------|-------------------|------------------------------------------------------------------------------------------------------|------------------------|--------------|----------------------|------------|
| Acquisition Time (sec) | 1.1010                                                                                                                   | Comment           | EJT-PRM115 product data allylic alcohol mCARBONnight CDCl3 /opt/oldbruk500data.11vii1/2014/Jan ejt 3 |                        |              |                      |            |
| Date                   | 12 Jan 2014 17:50:56                                                                                                     | Date Stamp        | 12 Jan 2014 17:50:56                                                                                 |                        |              |                      |            |
| File Name              | \\ss7a.ds.man.ac.uk\vol5\VOL3\USERS\SNMRDATA\BRUK500DATA\BRUK500DATA\2014\JAN\DATA\EJT\NMR\2014-01-12-EJT-3\10\PDAT\111R |                   |                                                                                                      |                        |              |                      |            |
| Frequency (MHz)        | 125.76                                                                                                                   | Nucleus           | 13C                                                                                                  | Number of Transients   | 3072         | Origin               | spect      |
| Original Points Count  | 32768                                                                                                                    | Owner             | vnmr1                                                                                                | Points Count           | 32768        | Pulse Sequence       | zgpg30     |
| Receiver Gain          | 512.00                                                                                                                   | SW(cyclical) (Hz) | 29761.90                                                                                             | Solvent                | CHLOROFORM-d | Spectrum Offset (Hz) | 12571.1670 |
| Spectrum Type          | STANDARD                                                                                                                 | Sweep Width (Hz)  | 29761.00                                                                                             | Temperature (degree C) | 20.099       |                      |            |

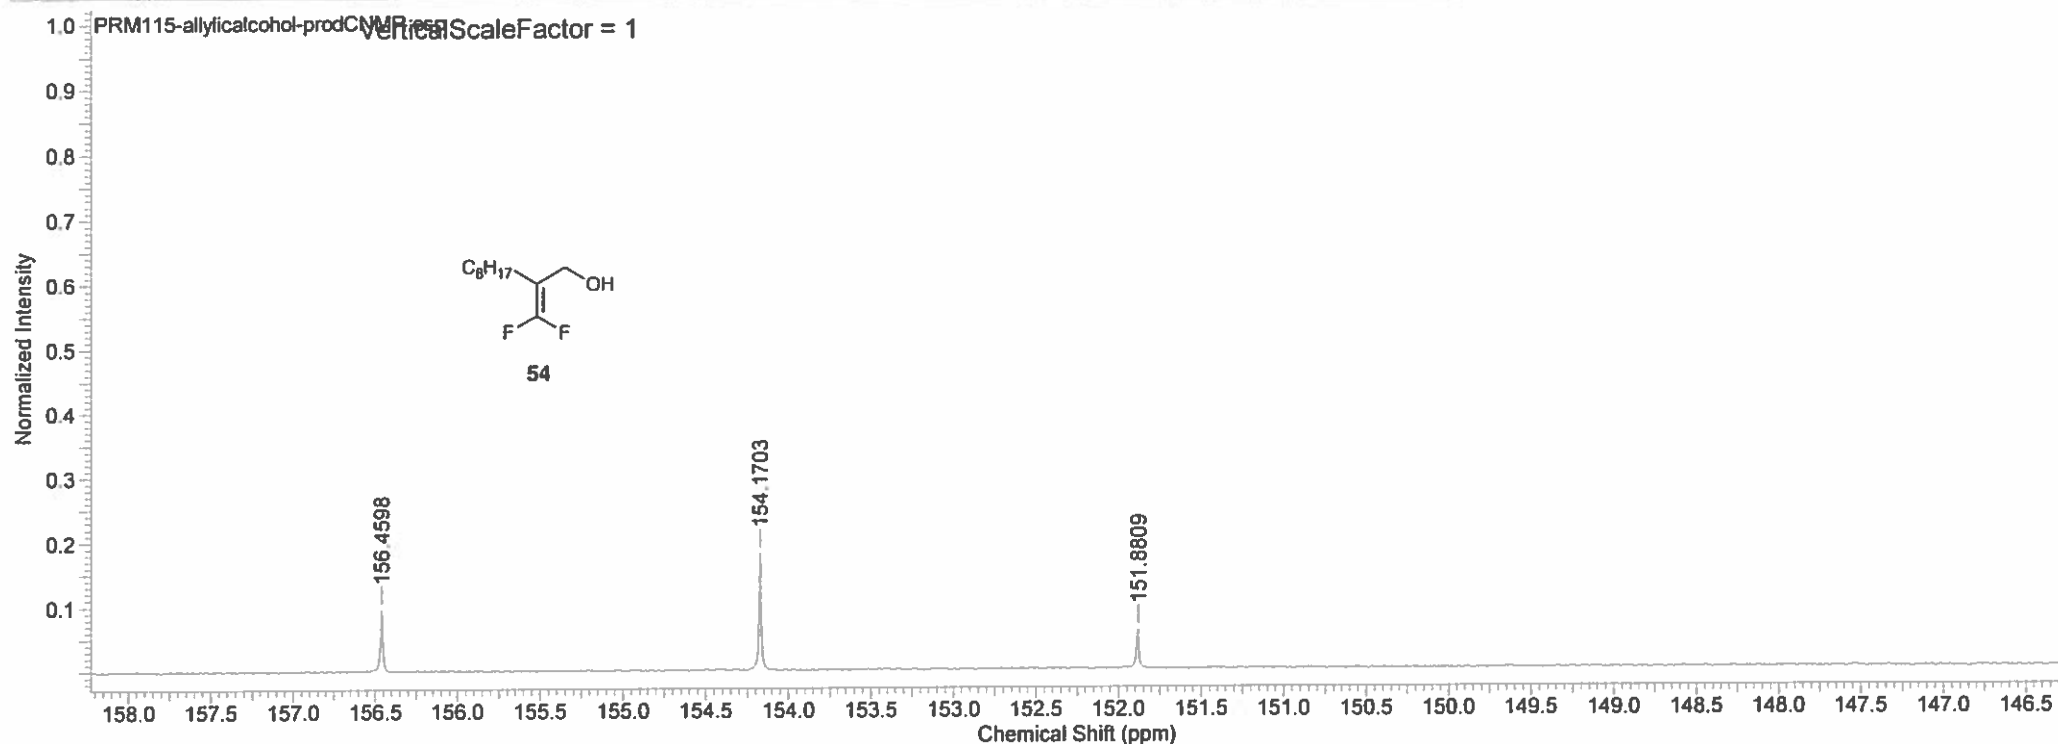

| No. | (ppm) | (Hz)   | Height | No. | (ppm) | (Hz)   | Height | No. | (ppm) | (Hz)    | Height | No. | (ppm)  | (Hz)    | Height |
|-----|-------|--------|--------|-----|-------|--------|--------|-----|-------|---------|--------|-----|--------|---------|--------|
| 1   | 14.04 | 1766.0 | 0.7988 | 5   | 27.52 | 3460.9 | 0.3816 | 9   | 31.82 | 4001.3  | 0.8907 | 13  | 90.03  | 11321.9 | 0.0938 |
| 2   | 22.62 | 2845.1 | 1.0000 | 6   | 29.20 | 3671.6 | 0.7282 | 10  | 57.66 | 7251.0  | 0.1504 | 14  | 90.05  | 11324.6 | 0.0980 |
| 3   | 24.44 | 3073.0 | 0.4542 | 7   | 29.22 | 3675.2 | 0.7842 | 11  | 57.70 | 7256.5  | 0.1568 | 15  | 90.16  | 11338.2 | 0.0866 |
| 4   | 27.50 | 3458.1 | 0.2238 | 8   | 29.32 | 3687.0 | 0.8407 | 12  | 89.92 | 11308.2 | 0.0872 | 16  | 151.88 | 19100.2 | 0.0602 |

| No. | (ppm)  | (Hz)    | Height |
|-----|--------|---------|--------|
| 17  | 154.17 | 19388.1 | 0.1808 |
| 18  | 156.46 | 19676.0 | 0.0960 |

|                        |                                                                                                               |                   |                                                                           |                        |              |                      |             |
|------------------------|---------------------------------------------------------------------------------------------------------------|-------------------|---------------------------------------------------------------------------|------------------------|--------------|----------------------|-------------|
| Acquisition Time (sec) | 0.7340                                                                                                        | Comment           | EJT-PRM115E prod frags 94mg mF19CPD CDCl3 (e:\bruk400data\2013\Dec) ejt 9 |                        |              |                      |             |
| Date                   | 18 Dec 2013 12:50:08                                                                                          | Date Stamp        | 18 Dec 2013 12:50:08                                                      |                        |              |                      |             |
| File Name              | \\ss7a.ds.man.ac.uk\vol5\VOL3\USERS\SNMRDATA\BRUK400DATA\2013\DEC\DATA\EJT\NMR\2013-12-18-EJT-9\11\PDATA\111R |                   |                                                                           |                        |              |                      |             |
| Frequency (MHz)        | 376.50                                                                                                        | Nucleus           | 19F                                                                       | Number of Transients   | 16           | Origin               | AV400       |
| Original Points Count  | 65536                                                                                                         | Owner             | Administrator                                                             | Points Count           | 262144       | Pulse Sequence       | zgig        |
| Receiver Gain          | 4100.00                                                                                                       | SW(cyclical) (Hz) | 89285.71                                                                  | Solvent                | CHLOROFORM-d | Spectrum Offset (Hz) | -37649.5977 |
| Spectrum Type          | STANDARD                                                                                                      | Sweep Width (Hz)  | 89285.37                                                                  | Temperature (degree C) | 20.700       |                      |             |

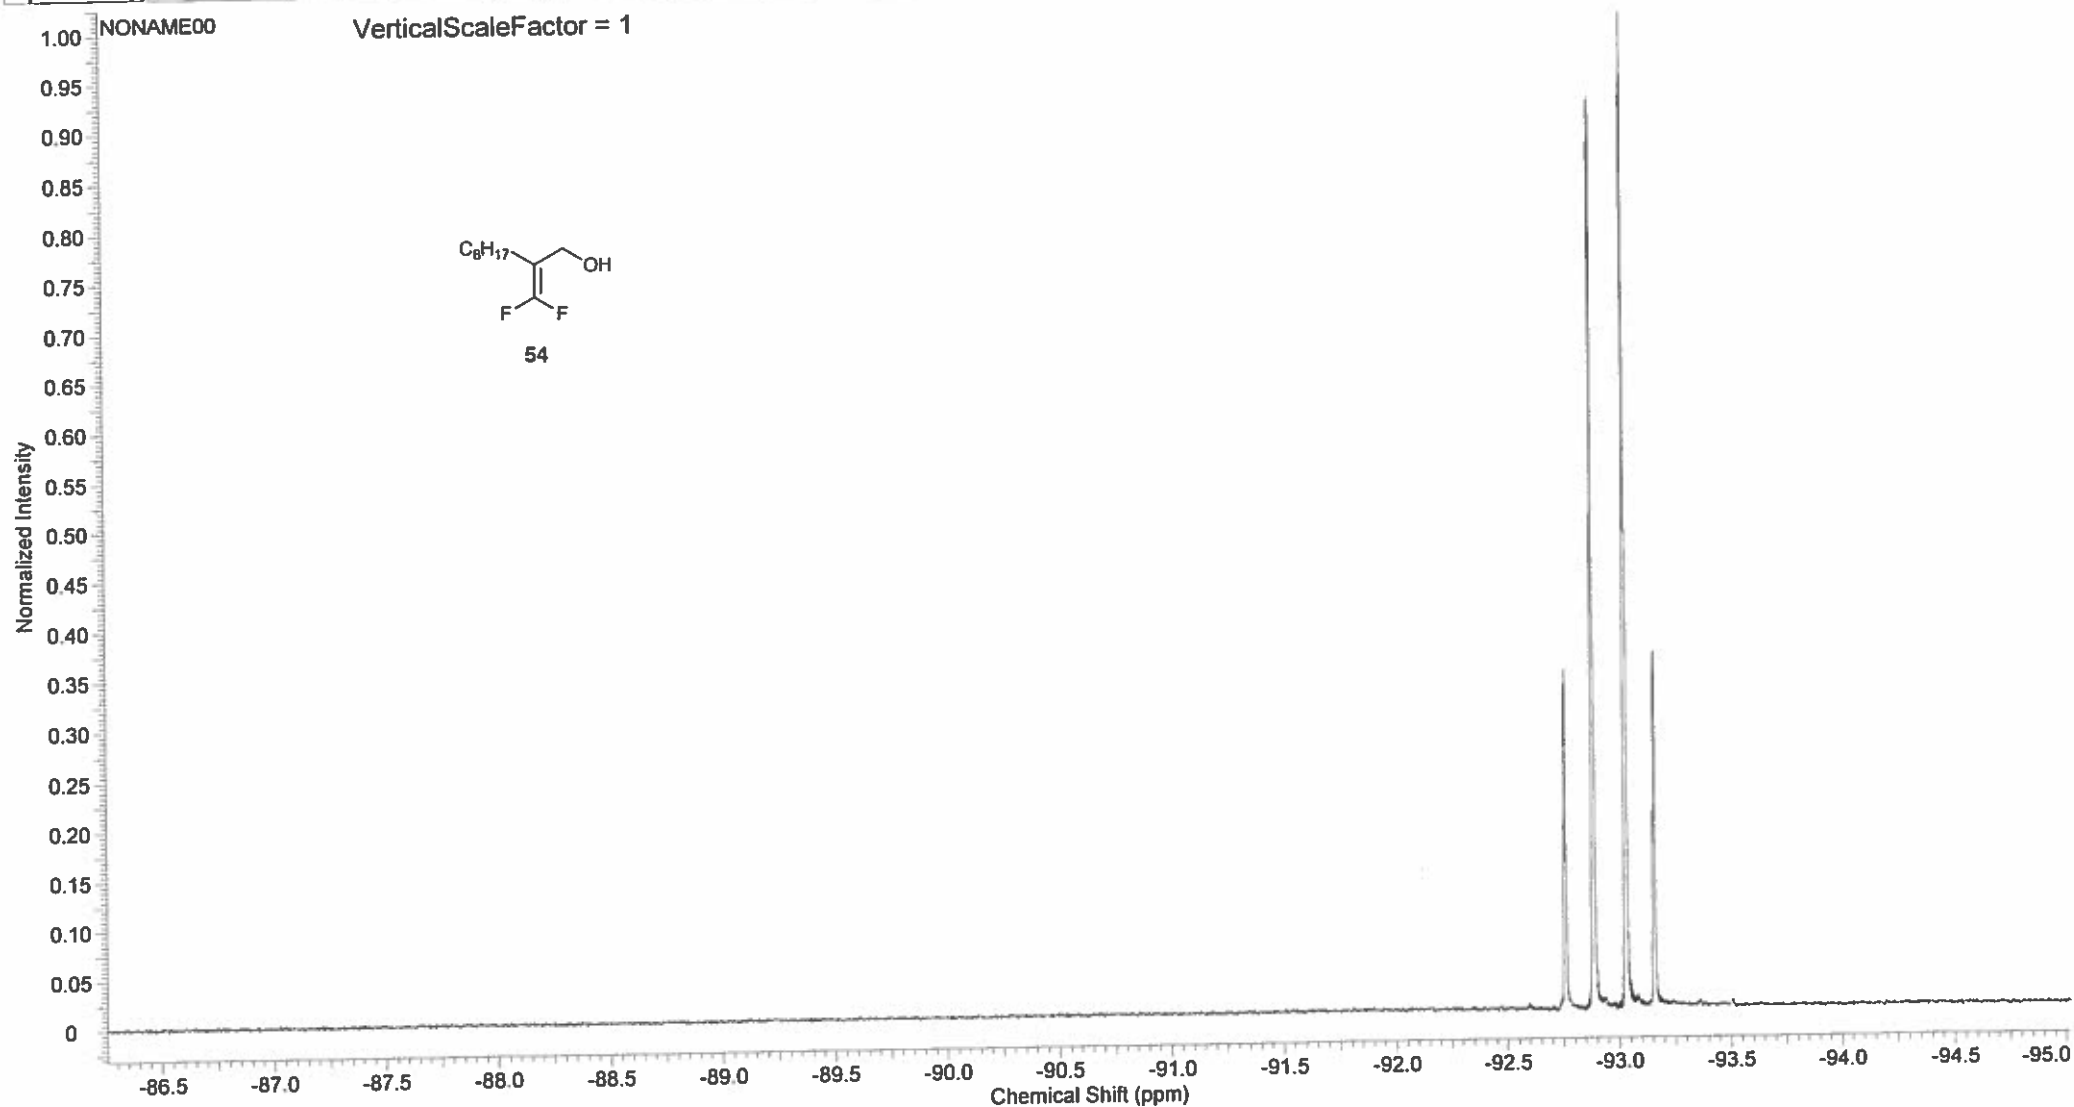

|                        |                                                                                                       |                        |                                                                                     |                      |                 |                       |          |
|------------------------|-------------------------------------------------------------------------------------------------------|------------------------|-------------------------------------------------------------------------------------|----------------------|-----------------|-----------------------|----------|
| Acquisition Time (sec) | 3.1719                                                                                                | Comment                | EJT-PRM116 gamma-bromide data mPROTONnight CDCl3 (F:\bruk500_b_data\2014\Jan\ejt 15 |                      |                 |                       |          |
| Date                   | 13 Jan 2014 16:08:32                                                                                  | Date Stamp             | 13 Jan 2014 16:08:32                                                                |                      |                 |                       |          |
| File Name              | \\ss7a.ds.man.ac.uk\vol5\vol3\users\snmrdata\bruk500\data\2014\Jan\data\ejt\nmr\2014-01-13-ejt-15\fid |                        |                                                                                     |                      | Frequency (MHz) | 500.13                |          |
| Nucleus                | 1H                                                                                                    | Number of Transients   | 16                                                                                  | Origin               | spect           | Original Points Count | 32768    |
| Owner                  | Administrator                                                                                         | Points Count           | 32768                                                                               | Pulse Sequence       | zg30            | Receiver Gain         | 20.20    |
| SW(cyclical) (Hz)      | 10330.58                                                                                              | Solvent                | CHLOROFORM-d                                                                        | Spectrum Offset (Hz) | 3079.6614       | Spectrum Type         | STANDARD |
| Sweep Width (Hz)       | 10330.26                                                                                              | Temperature (degree C) | 25.000                                                                              |                      |                 |                       |          |

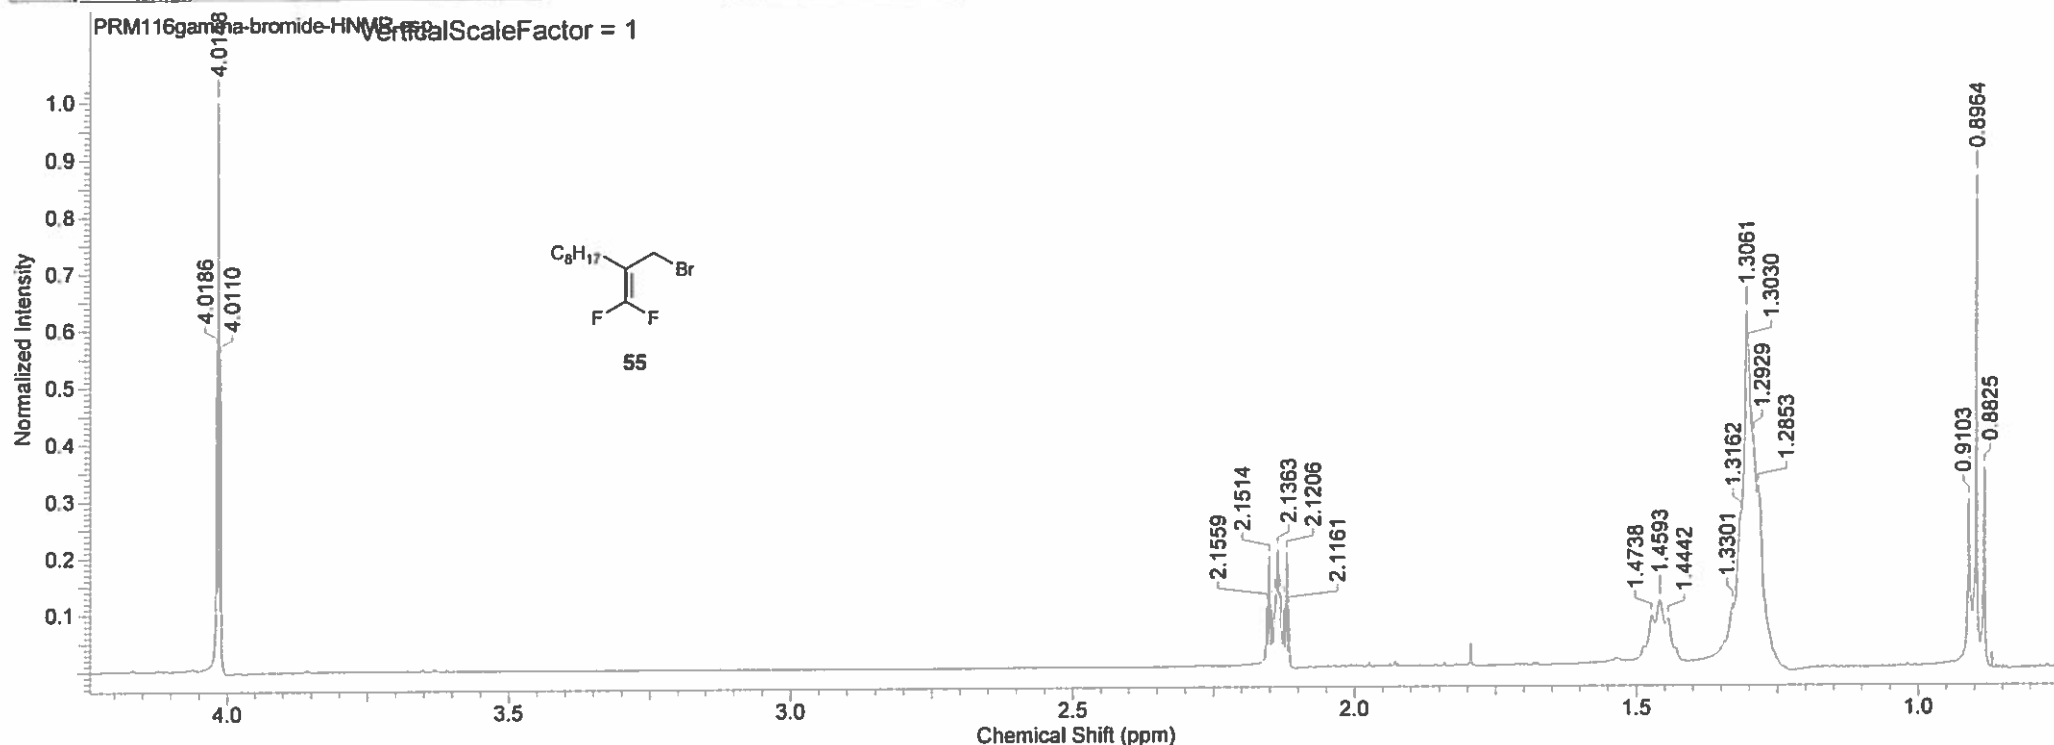

| No. | (ppm) | (Hz)  | Height | No. | (ppm) | (Hz)  | Height | No. | (ppm) | (Hz)   | Height | No. | (ppm) | (Hz)   | Height |
|-----|-------|-------|--------|-----|-------|-------|--------|-----|-------|--------|--------|-----|-------|--------|--------|
| 1   | 0.88  | 441.4 | 0.3473 | 6   | 1.30  | 651.7 | 0.5638 | 11  | 1.46  | 729.8  | 0.1155 | 16  | 2.13  | 1066.2 | 0.1312 |
| 2   | 0.90  | 448.3 | 0.8616 | 7   | 1.31  | 653.2 | 0.6235 | 12  | 1.47  | 737.1  | 0.0883 | 17  | 2.13  | 1067.2 | 0.1312 |
| 3   | 0.91  | 455.2 | 0.2924 | 8   | 1.32  | 658.3 | 0.2676 | 13  | 2.12  | 1058.3 | 0.1030 | 18  | 2.14  | 1068.4 | 0.2079 |
| 4   | 1.29  | 642.8 | 0.3156 | 9   | 1.33  | 665.2 | 0.1092 | 14  | 2.12  | 1060.6 | 0.2010 | 19  | 2.14  | 1070.6 | 0.1279 |
| 5   | 1.29  | 646.6 | 0.4054 | 10  | 1.44  | 722.3 | 0.0831 | 15  | 2.12  | 1062.8 | 0.1131 | 20  | 2.15  | 1073.8 | 0.1106 |
|     |       |       |        |     |       |       |        |     |       |        |        | 21  | 2.15  | 1076.0 | 0.1937 |
|     |       |       |        |     |       |       |        |     |       |        |        | 22  | 2.16  | 1078.2 | 0.1086 |
|     |       |       |        |     |       |       |        |     |       |        |        | 23  | 4.01  | 2006.0 | 0.5535 |
|     |       |       |        |     |       |       |        |     |       |        |        | 24  | 4.01  | 2007.9 | 1.0000 |
|     |       |       |        |     |       |       |        |     |       |        |        | 25  | 4.02  | 2009.8 | 0.5684 |

|                        |                                                                                        |                        |                                                                                      |                      |            |
|------------------------|----------------------------------------------------------------------------------------|------------------------|--------------------------------------------------------------------------------------|----------------------|------------|
| Acquisition Time (sec) | 1.0912                                                                                 | Comment                | EJT-PRM116 gamma-bromide data mCARBONnight CDCl3 (F:\bruk500_b_data\2014\Jan) ejt 15 |                      |            |
| Date                   | 13 Jan 2014 20:50:08                                                                   | Date Stamp             | 13 Jan 2014 20:50:08                                                                 |                      |            |
| File Name              | \\ss7a.ds.man.ac.uk\vol5\vol3\users\snmrdata\bruk500bdata\2014\Jan\data\ejt15\15111Vid |                        |                                                                                      | Frequency (MHz)      | 125.76     |
| Nucleus                | 13C                                                                                    | Number of Transients   | 3096                                                                                 | Origin               | spect      |
| Owner                  | Administrator                                                                          | Points Count           | 32768                                                                                | Pulse Sequence       | zgpg30     |
| SW(cyclical) (Hz)      | 30030.03                                                                               | Solvent                | CHLOROFORM-d                                                                         | Receiver Gain        | 4597.60    |
| Sweep Width (Hz)       | 30029.11                                                                               | Temperature (degree C) | 25.000                                                                               | Spectrum Offset (Hz) | 12574.2715 |
|                        |                                                                                        |                        |                                                                                      | Spectrum Type        | STANDARD   |

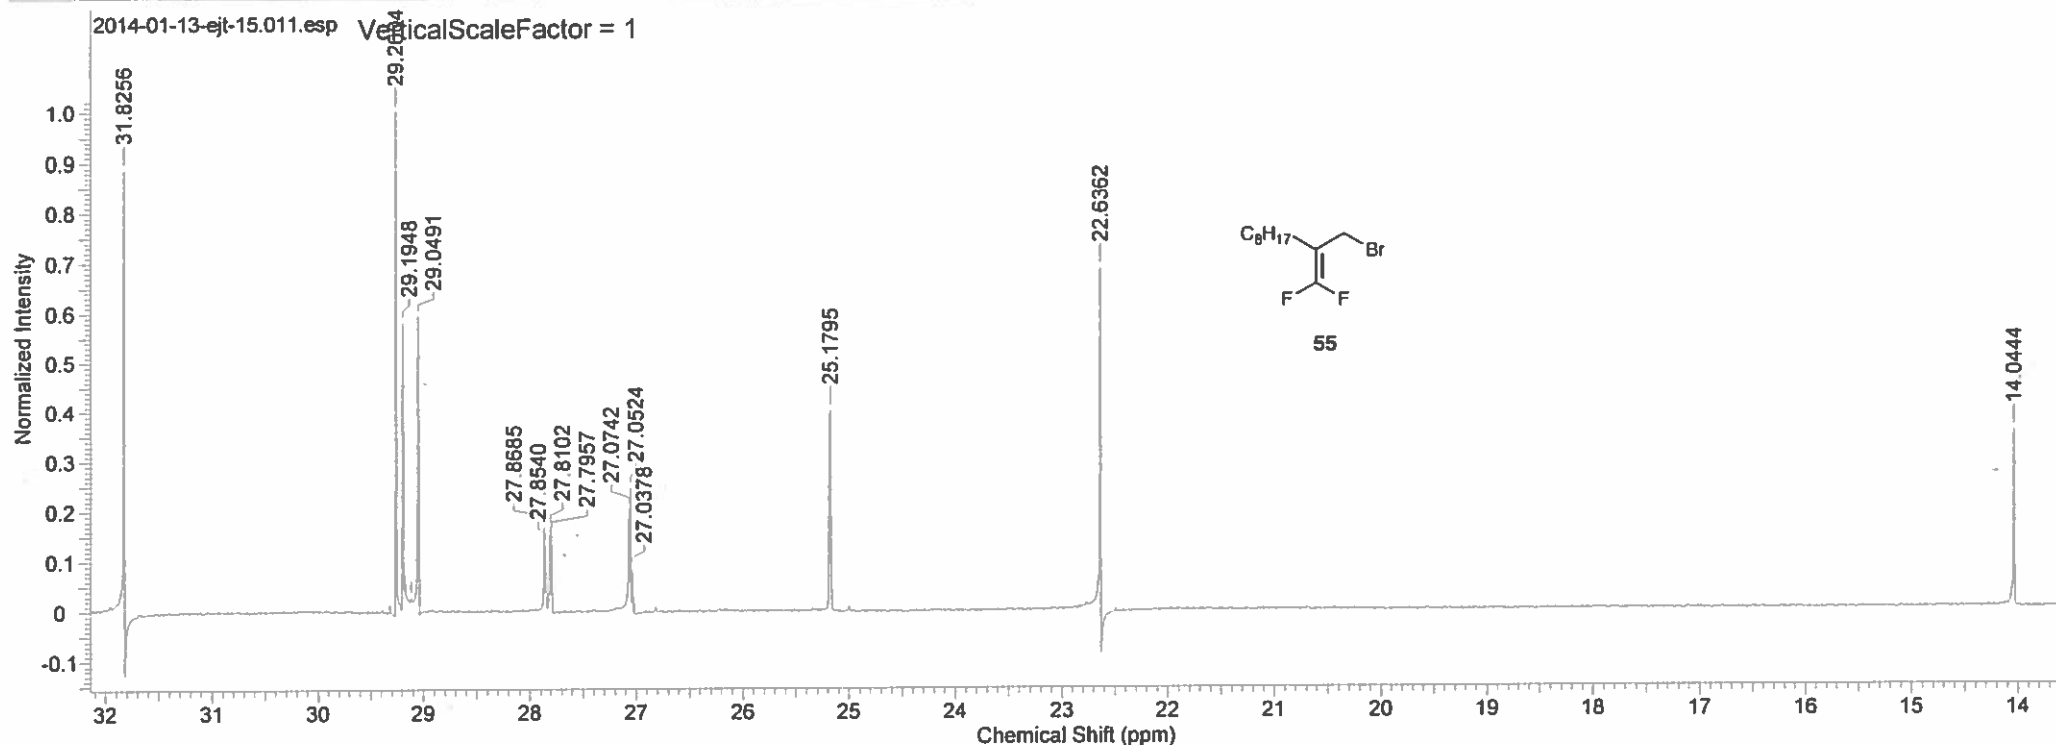

| No. | (ppm) | (Hz)   | Height | No. | (ppm) | (Hz)   | Height | No. | (ppm) | (Hz)   | Height | No. | (ppm)  | (Hz)    | Height |
|-----|-------|--------|--------|-----|-------|--------|--------|-----|-------|--------|--------|-----|--------|---------|--------|
| 1   | 14.04 | 1766.2 | 0.3511 | 6   | 27.07 | 3404.8 | 0.2039 | 11  | 29.05 | 3653.1 | 0.5937 | 16  | 88.84  | 11172.6 | 0.0722 |
| 2   | 22.64 | 2846.7 | 0.6830 | 7   | 27.80 | 3495.5 | 0.1549 | 12  | 29.11 | 3661.4 | 0.0268 | 17  | 88.95  | 11186.3 | 0.0809 |
| 3   | 25.18 | 3166.5 | 0.4006 | 8   | 27.81 | 3497.4 | 0.1686 | 13  | 29.19 | 3671.5 | 0.5800 | 18  | 89.02  | 11195.5 | 0.0630 |
| 4   | 27.04 | 3400.2 | 0.0841 | 9   | 27.85 | 3502.9 | 0.1310 | 14  | 29.26 | 3679.7 | 1.0000 | 19  | 89.13  | 11208.3 | 0.0664 |
| 5   | 27.05 | 3402.0 | 0.2455 | 10  | 27.87 | 3504.7 | 0.1670 | 15  | 31.83 | 4002.3 | 0.8875 | 20  | 151.60 | 19065.0 | 0.0455 |
|     |       |        |        |     |       |        |        |     |       |        |        | 21  | 153.90 | 19354.6 | 0.0672 |
|     |       |        |        |     |       |        |        |     |       |        |        | 22  | 153.92 | 19356.4 | 0.0605 |
|     |       |        |        |     |       |        |        |     |       |        |        | 23  | 156.22 | 19646.0 | 0.0411 |



|                        |                                                                                                      |                        |                                                                                     |                      |            |
|------------------------|------------------------------------------------------------------------------------------------------|------------------------|-------------------------------------------------------------------------------------|----------------------|------------|
| Acquisition Time (sec) | 1.0912                                                                                               | Comment                | EJT-PRM116 gamma-bromide data mCARBONnight CDCl3 (F:\bruk500_b_data\2014\Jan\ejt 15 |                      |            |
| Date                   | 13 Jan 2014 20:50:08                                                                                 | Date Stamp             | 13 Jan 2014 20:50:08                                                                |                      |            |
| File Name              | \\ss7a.ds.man.ac.uk\vol5\vol3\users\snmrdata\bruk500bdata\2014\Jan\data\ejt15\15-01-13-ejt-15\11\fid |                        |                                                                                     | Frequency (MHz)      | 125.76     |
| Nucleus                | 13C                                                                                                  | Number of Transients   | 3096                                                                                | Origin               | spect      |
| Owner                  | Administrator                                                                                        | Points Count           | 32768                                                                               | Pulse Sequence       | zgpg30     |
| SW(cyclical) (Hz)      | 30030.03                                                                                             | Solvent                | CHLOROFORM-d                                                                        | Receiver Gain        | 4597.60    |
| Sweep Width (Hz)       | 30029.11                                                                                             | Temperature (degree C) | 25.000                                                                              | Spectrum Offset (Hz) | 12574.2715 |
|                        |                                                                                                      |                        |                                                                                     | Spectrum Type        | STANDARD   |

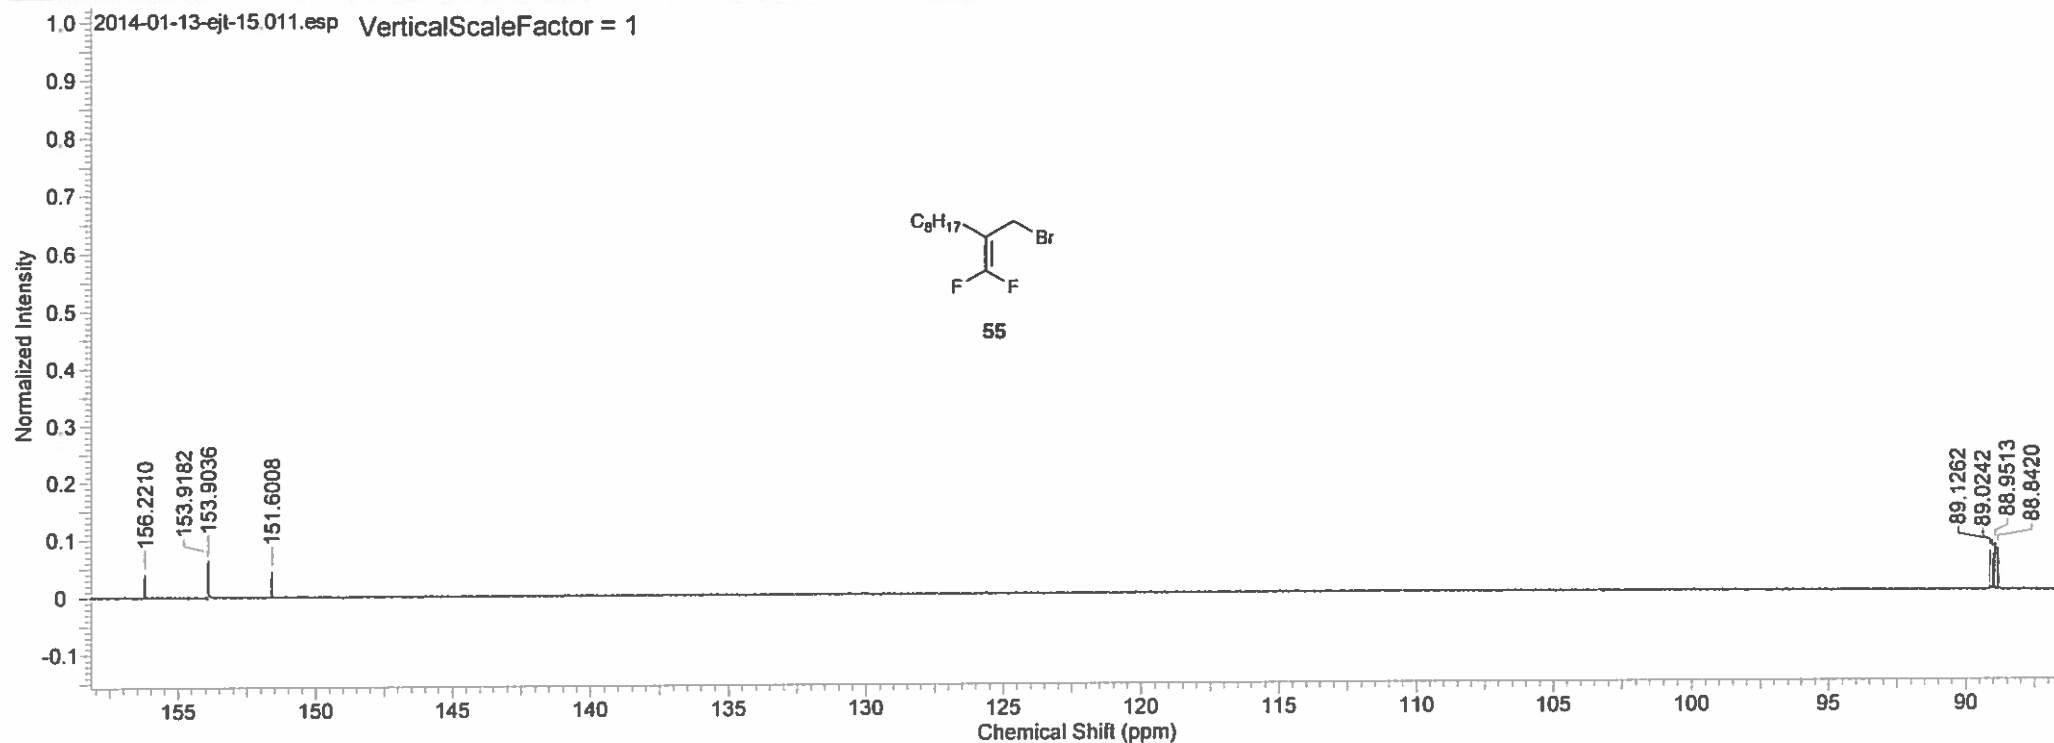

| No. | (ppm)  | (Hz)    | Height |
|-----|--------|---------|--------|
| 1   | 88.84  | 11172.6 | 0.0722 |
| 2   | 88.95  | 11186.3 | 0.0809 |
| 3   | 89.02  | 11195.5 | 0.0630 |
| 4   | 89.13  | 11208.3 | 0.0664 |
| 5   | 151.60 | 19065.0 | 0.0455 |
| 6   | 153.90 | 19354.6 | 0.0672 |
| 7   | 153.92 | 19356.4 | 0.0605 |
| 8   | 156.22 | 19646.0 | 0.0411 |

|                        |                                                                                                         |                   |                                                                      |                        |              |                      |             |
|------------------------|---------------------------------------------------------------------------------------------------------|-------------------|----------------------------------------------------------------------|------------------------|--------------|----------------------|-------------|
| Acquisition Time (sec) | 0.7340                                                                                                  | Comment           | EJT-PRM116 f3+4 117mg mF19CPD CDCl3 (e:\bruk400data\2014\Jan) ejt 42 |                        |              |                      |             |
| Date                   | 13 Jan 2014 12:33:04                                                                                    | Date Stamp        | 13 Jan 2014 12:33:04                                                 |                        |              |                      |             |
| File Name              | \\ss7a.ds.man.ac.uk\vol5\USERS\SNMRDATA\BRUK400DATA\2014\JAN\DATA\EJTWNR\2014-01-13-EJT-42\11\PDAT\111R |                   |                                                                      |                        |              |                      |             |
| Frequency (MHz)        | 376.50                                                                                                  | Nucleus           | 19F                                                                  | Number of Transients   | 16           | Origin               | AV400       |
| Original Points Count  | 65536                                                                                                   | Owner             | Administrator                                                        | Points Count           | 262144       | Pulse Sequence       | zgig        |
| Receiver Gain          | 4100.00                                                                                                 | SW(cyclical) (Hz) | 89285.71                                                             | Solvent                | CHLOROFORM-d | Spectrum Offset (Hz) | -37649.5977 |
| Spectrum Type          | STANDARD                                                                                                | Sweep Width (Hz)  | 89285.37                                                             | Temperature (degree C) | 20.800       |                      |             |

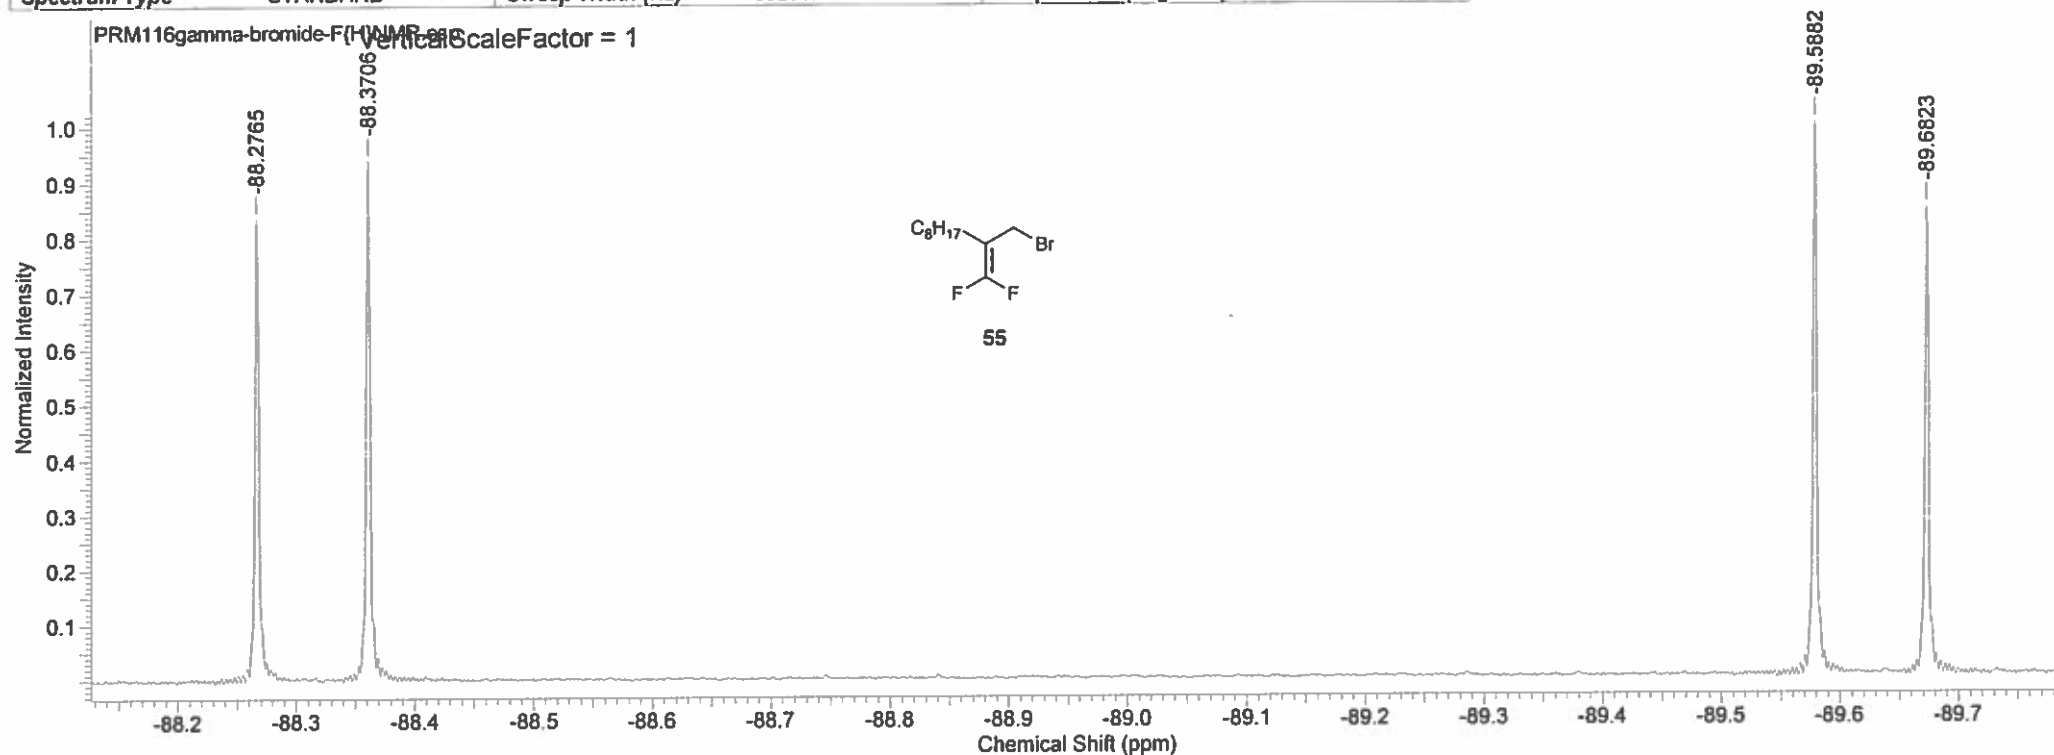

| No. | (ppm)  | (Hz)     | Height |
|-----|--------|----------|--------|
| 1   | -89.68 | -33765.3 | 0.8449 |
| 2   | -89.59 | -33729.8 | 1.0000 |
| 3   | -88.37 | -33271.4 | 0.9398 |
| 4   | -88.28 | -33236.0 | 0.8364 |

|                        |                                                                                                                |                   |                                                                             |                        |              |                      |           |
|------------------------|----------------------------------------------------------------------------------------------------------------|-------------------|-----------------------------------------------------------------------------|------------------------|--------------|----------------------|-----------|
| Acquisition Time (sec) | 3.9649                                                                                                         | Comment           | EJT-PRM120 reflux o/n tol-d8 mPROTON CDCl3 (e:\bruk400data\2014\Jan) ejt 28 |                        |              |                      |           |
| Date                   | 10 Jan 2014 10:46:24                                                                                           | Date Stamp        | 10 Jan 2014 10:46:24                                                        |                        |              |                      |           |
| File Name              | \\ss7a.ds.man.ac.uk\vol5\VOL3\USERS\SNMRDATA\BRUK400DATA\2014\JAN\DATA\EJT\NMR\2014-01-10-EJT-28\10\PDATA\1\1R |                   |                                                                             |                        |              |                      |           |
| Frequency (MHz)        | 400.13                                                                                                         | Nucleus           | 1H                                                                          | Number of Transients   | 16           | Origin               | AV400     |
| Original Points Count  | 32768                                                                                                          | Owner             | Administrator                                                               | Points Count           | 32768        | Pulse Sequence       | zg30b     |
| Receiver Gain          | 128.00                                                                                                         | SW(cyclical) (Hz) | 8264.46                                                                     | Solvent                | CHLOROFORM-d | Spectrum Offset (Hz) | 2421.3662 |
| Spectrum Type          | STANDARD                                                                                                       | Sweep Width (Hz)  | 8264.21                                                                     | Temperature (degree C) | 20.400       |                      |           |

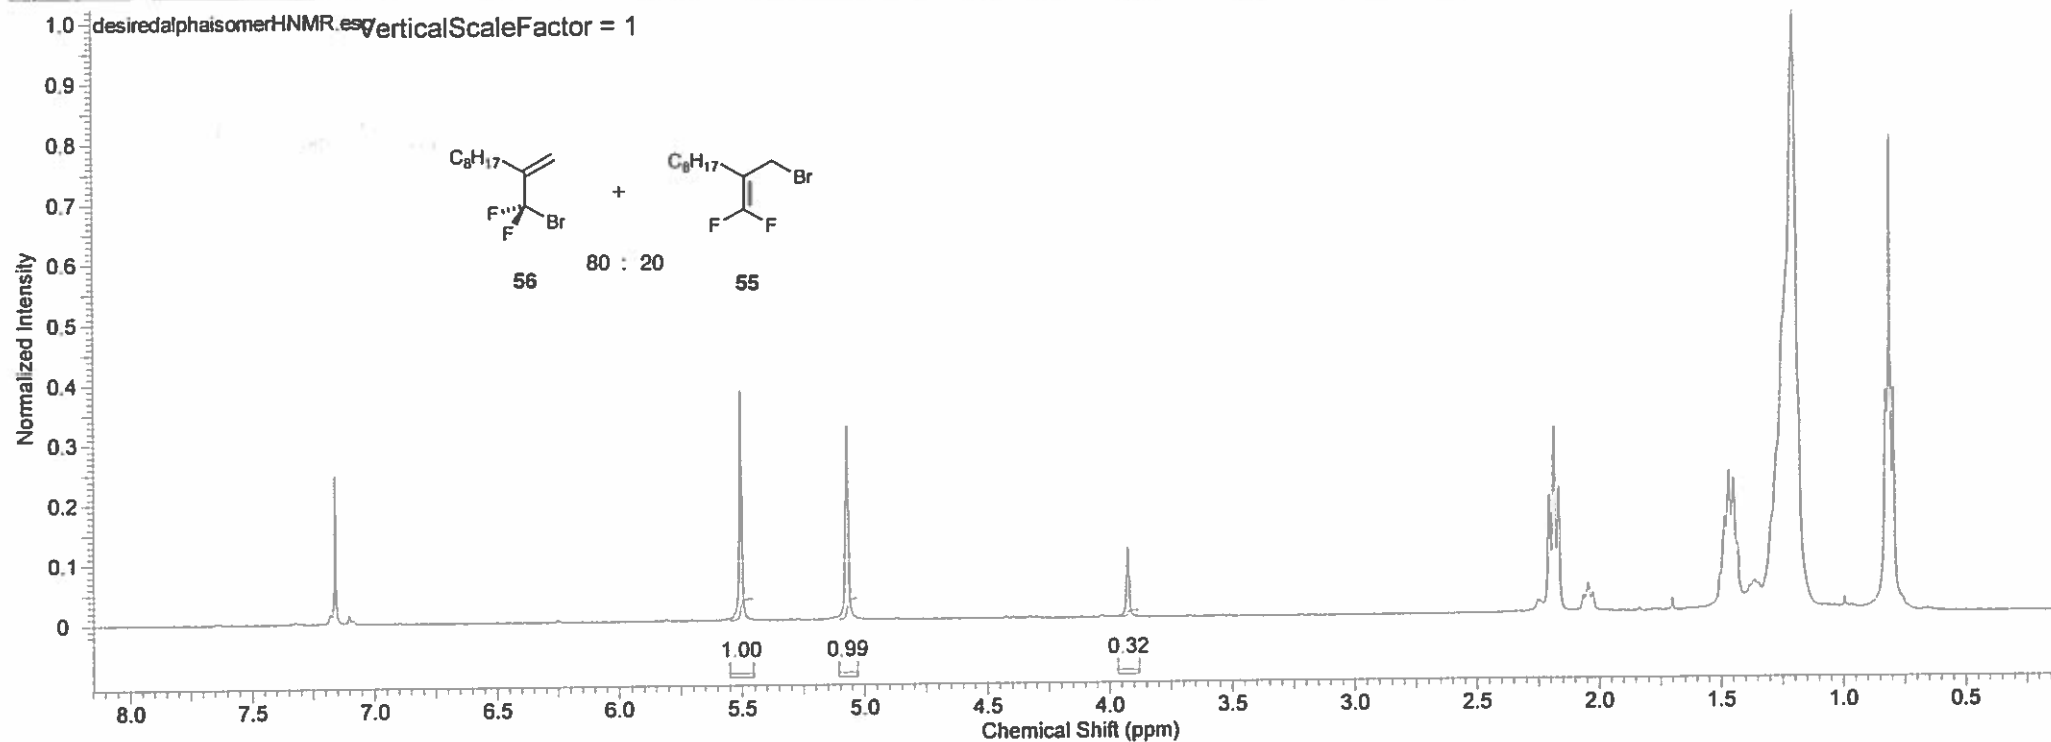

| No. | (ppm)         | Value      | Absolute Value | Non-Negative Value |
|-----|---------------|------------|----------------|--------------------|
| 1   | 3791 .. 3.960 | 0.31848073 | 6.23530000e+6  | 0.31848073         |
| 2   | 0303 .. 5.100 | 0.99194330 | 1.94205280e+7  | 0.99194330         |
| 3   | 4545 .. 5.550 | 0.99989295 | 1.95761680e+7  | 0.99989295         |

|                        |                                                                                                        |                        |                                                                                      |                      |            |
|------------------------|--------------------------------------------------------------------------------------------------------|------------------------|--------------------------------------------------------------------------------------|----------------------|------------|
| Acquisition Time (sec) | 1.0912                                                                                                 | Comment                | EJT-PRM116I alpha-bromide data mCARBONnight CDCI3 (F:\bruk500_b_data\2014Jan) ejt 16 |                      |            |
| Date                   | 14 Jan 2014 01:48:48                                                                                   | Date Stamp             | 14 Jan 2014 01:48:48                                                                 |                      |            |
| File Name              | \ss7a.ds.man.ac.uk\vol5\vol3\users\snmrdata\bruk500bdata\2014Jan\data\ejt\nmr\2014-01-13-ejt-16\11\fid |                        |                                                                                      | Frequency (MHz)      | 125.76     |
| Nucleus                | <sup>13</sup> C                                                                                        | Number of Transients   | 3096                                                                                 | Origin               | spect      |
| Owner                  | Administrator                                                                                          | Points Count           | 32768                                                                                | Pulse Sequence       | zgpg30     |
| SW(cyclical) (Hz)      | 30030.03                                                                                               | Solvent                | CHLOROFORM-d                                                                         | Receiver Gain        | 4096.00    |
| Sweep Width (Hz)       | 30029.11                                                                                               | Temperature (degree C) | 25.000                                                                               | Spectrum Offset (Hz) | 12574.2715 |
|                        |                                                                                                        |                        |                                                                                      | Spectrum Type        | STANDARD   |

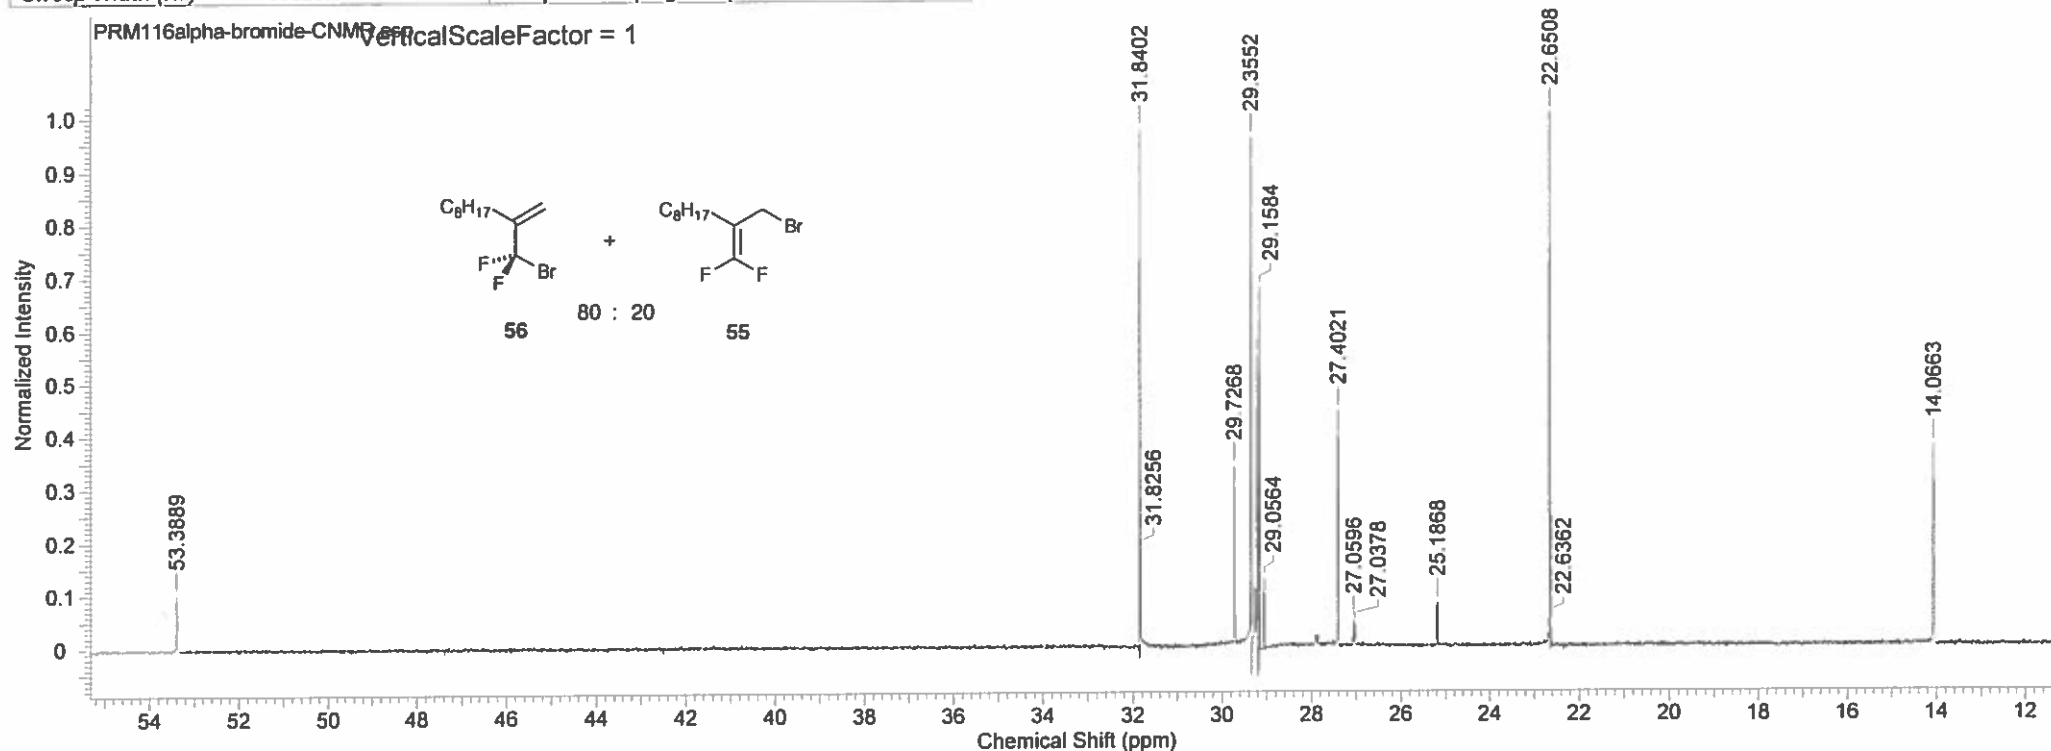

| No. | (ppm) | (Hz)   | Height | No. | (ppm) | (Hz)   | Height | No. | (ppm) | (Hz)   | Height | No. | (ppm)  | (Hz)    | Height |
|-----|-------|--------|--------|-----|-------|--------|--------|-----|-------|--------|--------|-----|--------|---------|--------|
| 1   | 14.07 | 1768.9 | 0.3709 | 6   | 27.06 | 3403.0 | 0.0437 | 11  | 29.27 | 3680.6 | 0.1341 | 16  | 53.39  | 6714.1  | 0.1016 |
| 2   | 22.64 | 2846.7 | 0.0414 | 7   | 27.40 | 3446.0 | 0.4405 | 12  | 29.36 | 3691.6 | 0.9545 | 17  | 114.26 | 14369.1 | 0.1056 |
| 3   | 22.65 | 2848.5 | 1.0000 | 8   | 29.06 | 3654.1 | 0.1222 | 13  | 29.73 | 3738.4 | 0.3351 | 18  | 114.32 | 14376.5 | 0.3611 |
| 4   | 25.19 | 3167.4 | 0.0763 | 9   | 29.16 | 3666.9 | 0.6740 | 14  | 31.83 | 4002.3 | 0.1738 | 19  | 114.38 | 14383.8 | 0.1226 |
| 5   | 27.04 | 3400.2 | 0.0358 | 10  | 29.21 | 3673.3 | 0.5448 | 15  | 31.84 | 4004.1 | 0.9721 | 20  | 117.30 | 14751.3 | 0.0533 |
|     |       |        |        |     |       |        |        |     |       |        |        | 21  | 119.73 | 15056.5 | 0.0576 |
|     |       |        |        |     |       |        |        |     |       |        |        | 22  | 122.16 | 15362.6 | 0.0286 |
|     |       |        |        |     |       |        |        |     |       |        |        | 23  | 145.21 | 18261.3 | 0.0397 |
|     |       |        |        |     |       |        |        |     |       |        |        | 24  | 145.37 | 18281.4 | 0.0736 |
|     |       |        |        |     |       |        |        |     |       |        |        | 25  | 145.52 | 18300.7 | 0.0430 |

|                        |                                                                                                         |                        |                                                                                       |                      |            |
|------------------------|---------------------------------------------------------------------------------------------------------|------------------------|---------------------------------------------------------------------------------------|----------------------|------------|
| Acquisition Time (sec) | 1.0912                                                                                                  | Comment                | EJT-PRM116I alpha-bromide data mCARBONnight CDCl3 (F:\bruk500_b_data\2014\Jan) ejt 16 |                      |            |
| Date                   | 14 Jan 2014 01:48:48                                                                                    | Date Stamp             | 14 Jan 2014 01:48:48                                                                  |                      |            |
| File Name              | \ss7a.ds.man.ac.uk\vol5\vol3\users\snmrdata\bruk500bdata\2014\Jan\data\ejt\nmr\2014-01-13-ejt-16\11\fid |                        |                                                                                       | Frequency (MHz)      | 125.76     |
| Nucleus                | <sup>13</sup> C                                                                                         | Number of Transients   | 3096                                                                                  | Origin               | spect      |
| Owner                  | Administrator                                                                                           | Points Count           | 32768                                                                                 | Pulse Sequence       | zgpg30     |
| SW(cyclical) (Hz)      | 30030.03                                                                                                | Solvent                | CHLOROFORM-d                                                                          | Receiver Gain        | 4096.00    |
| Sweep Width (Hz)       | 30029.11                                                                                                | Temperature (degree C) | 25.000                                                                                | Spectrum Offset (Hz) | 12574.2715 |
|                        |                                                                                                         |                        |                                                                                       | Spectrum Type        | STANDARD   |

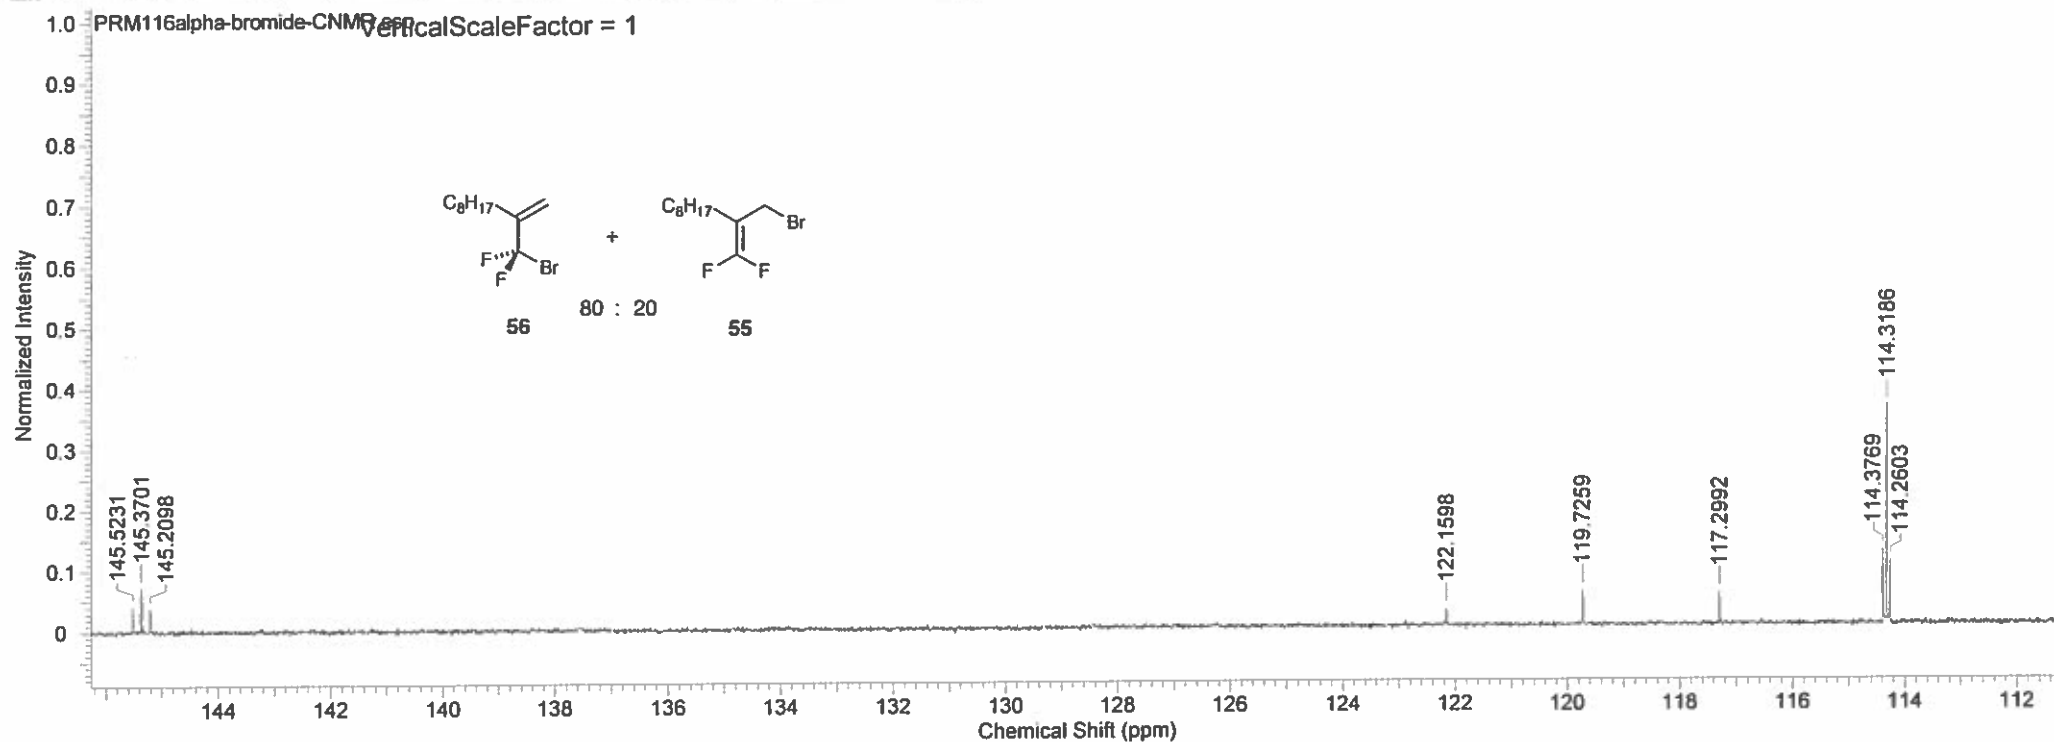

| No. | (ppm)  | (Hz)    | Height |
|-----|--------|---------|--------|
| 1   | 114.26 | 14369.1 | 0.1056 |
| 2   | 114.32 | 14376.5 | 0.3611 |
| 3   | 114.38 | 14383.8 | 0.1226 |
| 4   | 117.30 | 14751.3 | 0.0533 |
| 5   | 119.73 | 15056.5 | 0.0576 |
| 6   | 122.16 | 15362.6 | 0.0286 |
| 7   | 145.21 | 18261.3 | 0.0397 |
| 8   | 145.37 | 18281.4 | 0.0736 |
| 9   | 145.52 | 18300.7 | 0.0430 |

|                        |                                                                                                                |                   |                                                                             |                        |              |
|------------------------|----------------------------------------------------------------------------------------------------------------|-------------------|-----------------------------------------------------------------------------|------------------------|--------------|
| Acquisition Time (sec) | 0.7340                                                                                                         | Comment           | EJT-PRM120 reflux o/n tol-d8 mF19CPD CDCI3 (e:\bruk400data\2014\Jan) ejt 28 |                        |              |
| Date                   | 10 Jan 2014 10:48:32                                                                                           | Date Stamp        | 10 Jan 2014 10:48:32                                                        |                        |              |
| File Name              | \\ss7a.ds.man.ac.uk\vol5\VOL3\USERS\SNMRDATA\BRUK400DATA\2014\JAN\DATA\EJT\NMR\2014-01-10-EJT-28\11\PDATA\111R |                   |                                                                             |                        |              |
| Frequency (MHz)        | 376.50                                                                                                         | Nucleus           | 19F                                                                         | Number of Transients   | 16           |
| Original Points Count  | 65536                                                                                                          | Owner             | Administrator                                                               | Points Count           | 262144       |
| Receiver Gain          | 4100.00                                                                                                        | SW(cyclical) (Hz) | 89285.71                                                                    | Solvent                | CHLOROFORM-d |
| Spectrum Type          | STANDARD                                                                                                       | Sweep Width (Hz)  | 89285.37                                                                    | Temperature (degree C) | 20.700       |
|                        |                                                                                                                |                   |                                                                             | Origin                 | AV400        |
|                        |                                                                                                                |                   |                                                                             | Pulse Sequence         | zgpg         |
|                        |                                                                                                                |                   |                                                                             | Spectrum Offset (Hz)   | -37649.5977  |

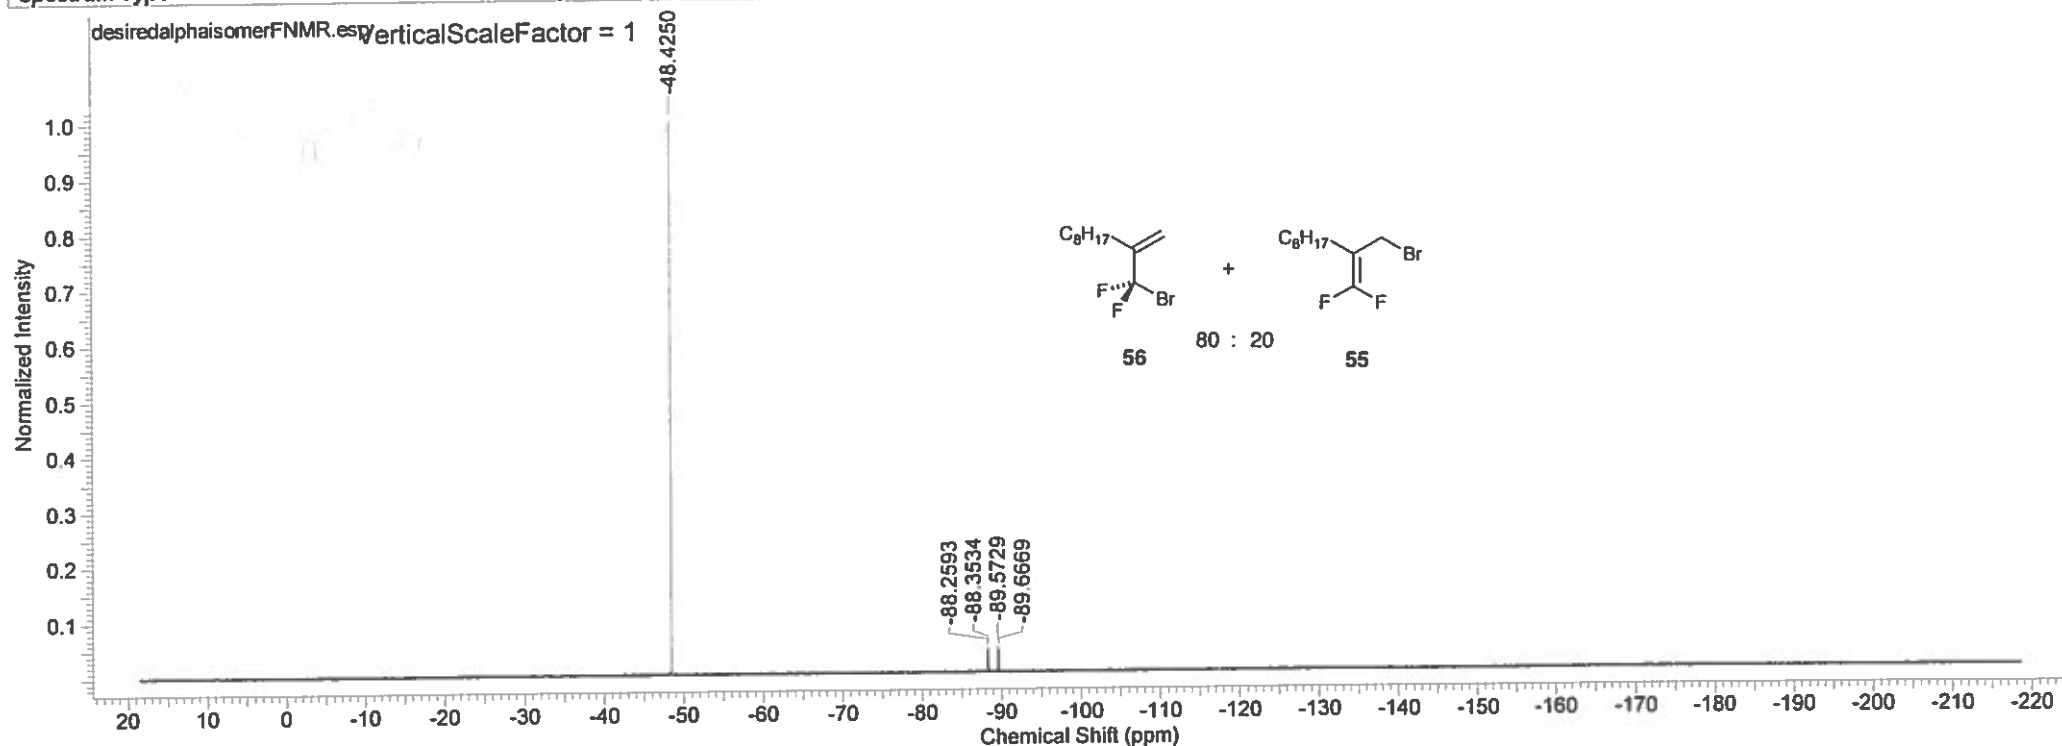

| No. | (ppm)  | (Hz)     | Height |
|-----|--------|----------|--------|
| 1   | -89.67 | -33759.5 | 0.0402 |
| 2   | -89.57 | -33724.0 | 0.0467 |
| 3   | -88.35 | -33264.9 | 0.0441 |
| 4   | -88.26 | -33229.5 | 0.0391 |
| 5   | -48.43 | -18231.9 | 1.0000 |

EJT-PRM123A prod data  
mPROTON\_A\_night CDCl3 {e:\bruk400cdata\2014\Jan} ejt 1

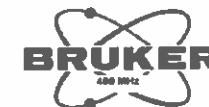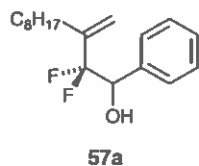

Current Data Parameters  
NAME 2014-01-27-ejt-1  
EXPNO 11  
PROCNO 1

F2 - Acquisition Parameters  
Date\_ 20140127  
Time 22.55  
INSTRUM spect  
PROBHD 5 mm CPPBBO BB  
PULPROG zg30  
TD 65536  
SOLVENT CDCl3  
NS 16  
DS 2  
SWH 8223.685 Hz  
FIDRES 0.125483 Hz  
AQ 3.9845889 sec  
RG 80.6  
DW 60.800 usec  
DE 10.00 usec  
TE 295.0 K  
D1 1.00000000 sec  
TDO 1

===== CHANNEL f1 =====  
SFO1 400.0718803 MHz  
NUC1 1H  
P1 12.00 usec  
PLW1 7.40000010 W

F2 - Processing parameters  
SI 32768  
SF 400.0700000 MHz  
WDW EM  
SSB 0  
LB 0.30 Hz  
GB 0  
PC 1.00

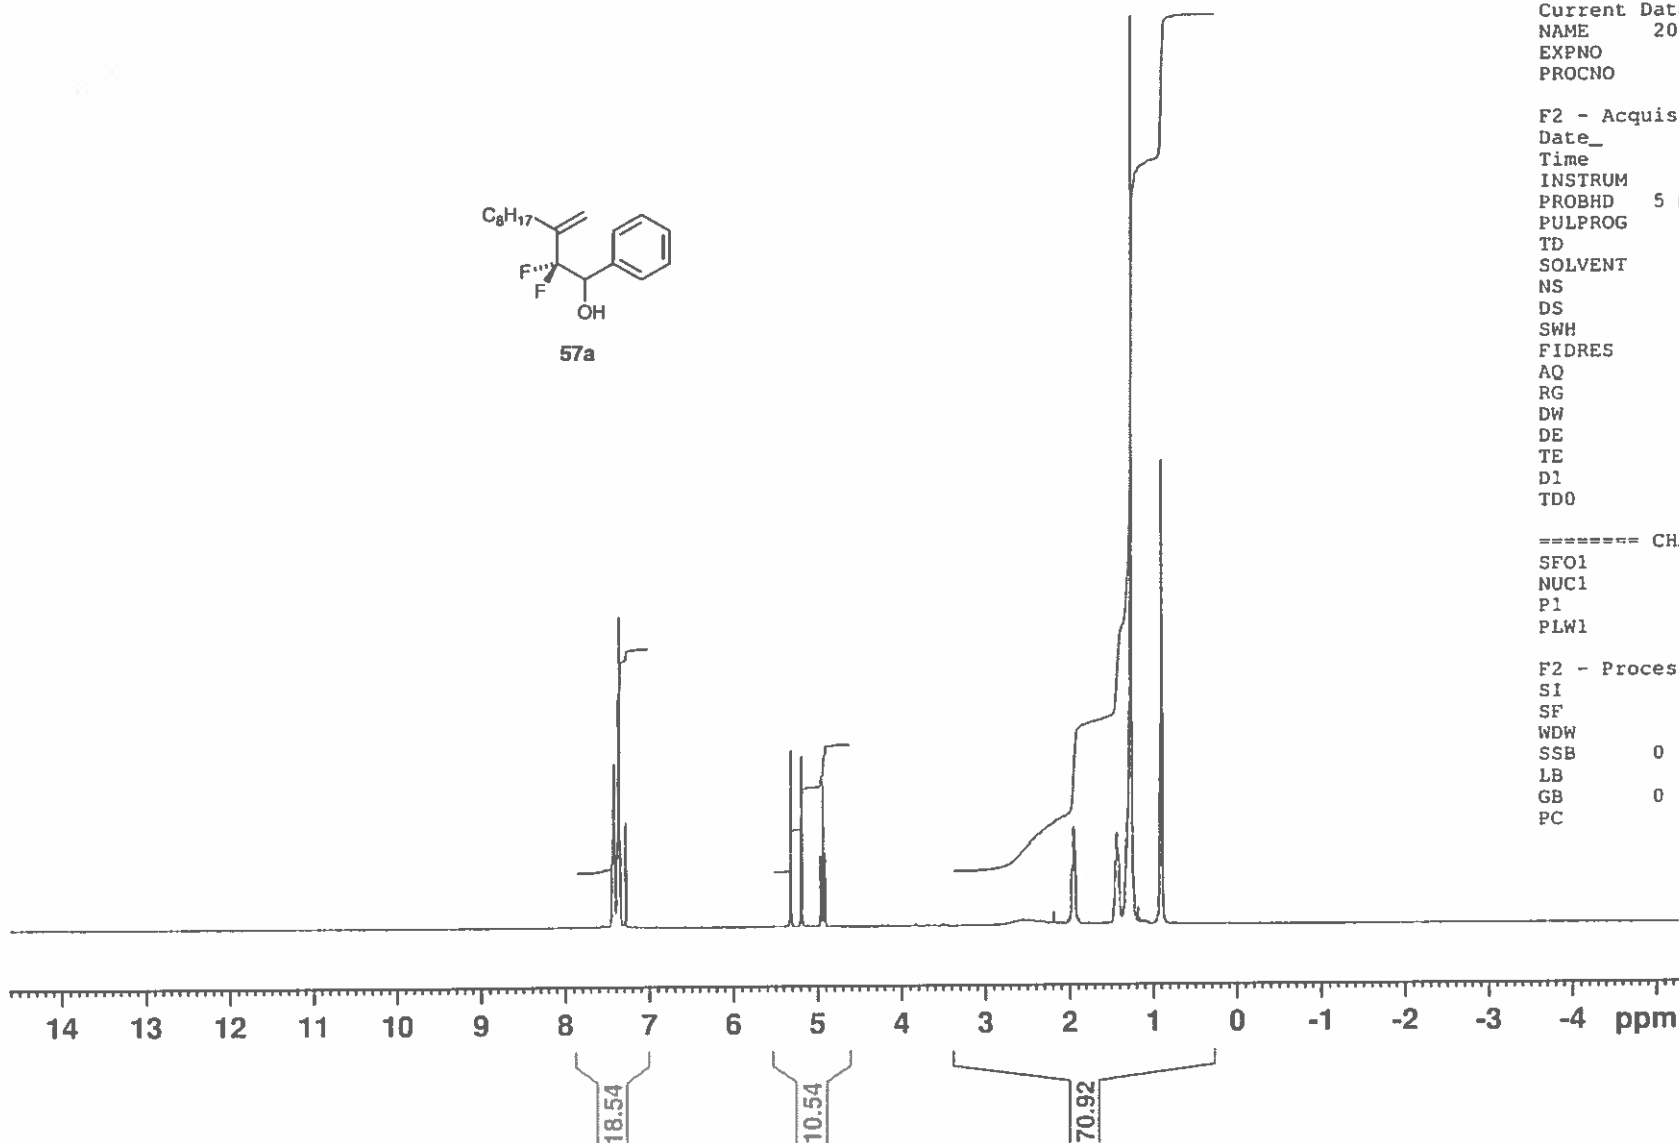

EJT-PRM123A prod data  
mCARBON\_B CDCl3 {e:\bruk400\data\2014\Jan\ejt-1

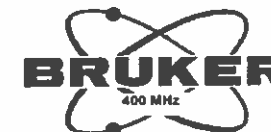

Current Data Parameters  
NAME 2014-01-27-ejt-1  
EXPNO 10  
PROCNO 1

F2 - Acquisition Parameters  
Date\_ 20140127  
Time 22.53  
INSTRUM spect  
PROBHD 5 mm CPPBBO BB  
PULPROG zgpg30  
TD 65536  
SOLVENT CDCl3  
NS 1024  
DS 4  
SWH 24038.461 Hz  
FIDRES 0.366798 Hz  
AQ 1.3631488 sec  
RG 45.2  
DW 20.800 usec  
DE 41.77 usec  
TE 295.0 K  
D1 2.00000000 sec  
D11 0.03000000 sec  
TD0 1

----- CHANNEL f1 -----  
SFO1 100.6077384 MHz  
NUC1 13C  
P1 10.00 usec  
PLW1 33.00000000 W

----- CHANNEL f2 -----  
SFO2 400.0716003 MHz  
NUC2 1H  
CPDPRG2 waltz16  
PCPD2 80.00 usec  
PLW2 7.40000010 W  
PLW12 0.17209999 W  
PLW13 0.11014000 W

F2 - Processing parameters  
S1 32768  
SF 100.5976820 MHz  
WDW EM  
SSB 0  
LB 1.00 Hz  
GB 0  
PC 1.40

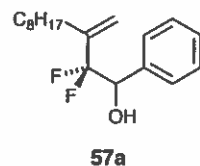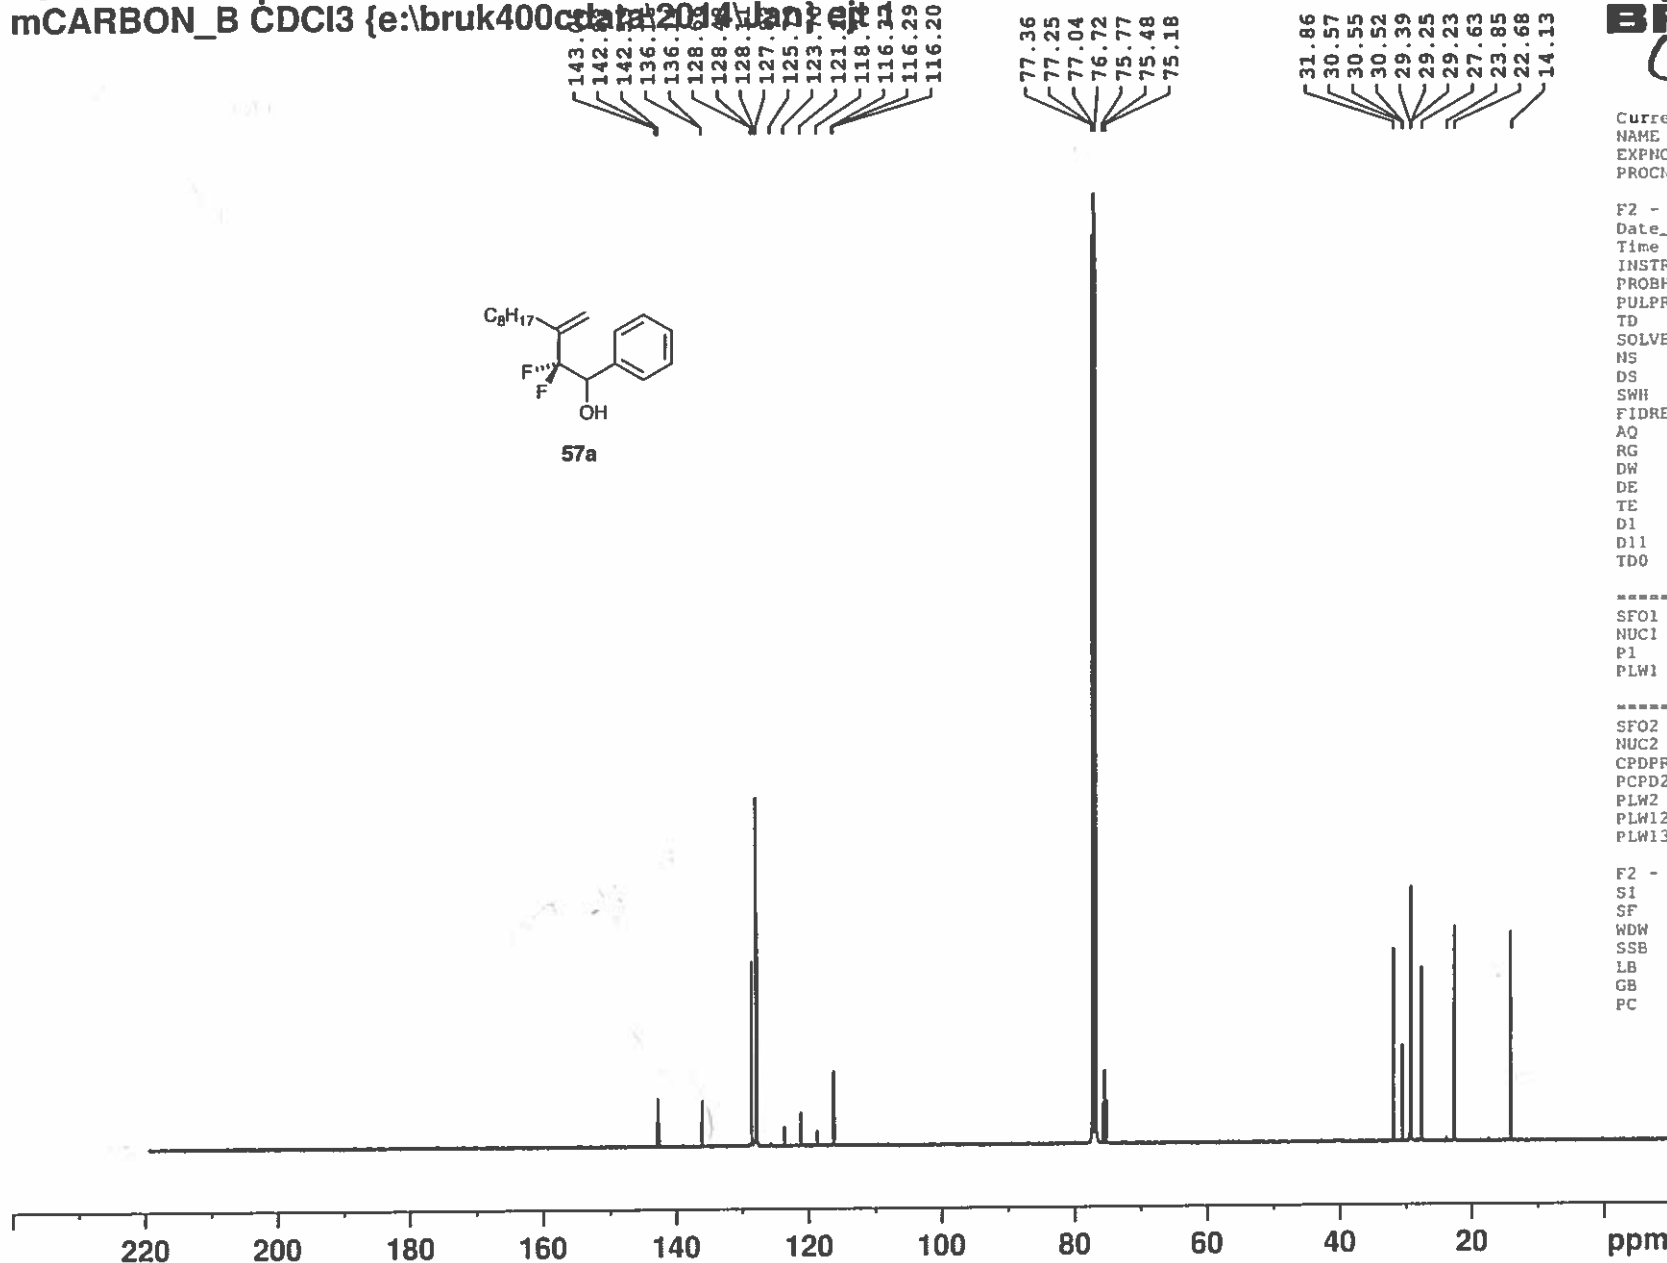



EJT-PRM123A f25-43 29mg  
m19F CDC13 /opt/oldbruk500data.11vii11/2014/Jan ejt 34

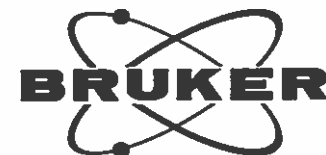

NAME 2014-01-27-ejt-34  
EXPNO 11  
PROCNO 1  
Date\_ 20140127  
Time 14.55  
INSTRUM spect  
PROBHD 5 mm PABBO BB-  
PULPROG zgpg30  
TD 131072  
SOLVENT CDC13  
NS 16  
DS 4  
SWH 113636.367 Hz  
FIDRES 0.866977 Hz  
AQ 0.5767668 sec  
RG 203  
DW 4.400 usec  
DE 6.50 usec  
TE 300.0 K  
D1 1.00000000 sec  
TD0 1

===== CHANNEL f1 =====  
NUC1 19F  
P1 12.38 usec  
PL1 -0.10 dB  
PL1W 25.70395851 W  
SFO1 470.5453180 MHz  
SI 65536  
SF 470.5923770 MHz  
WDW EM  
SSB 0  
LB 0.30 Hz  
GB 0  
PC 1.00

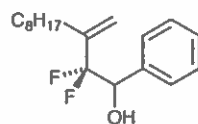

57a

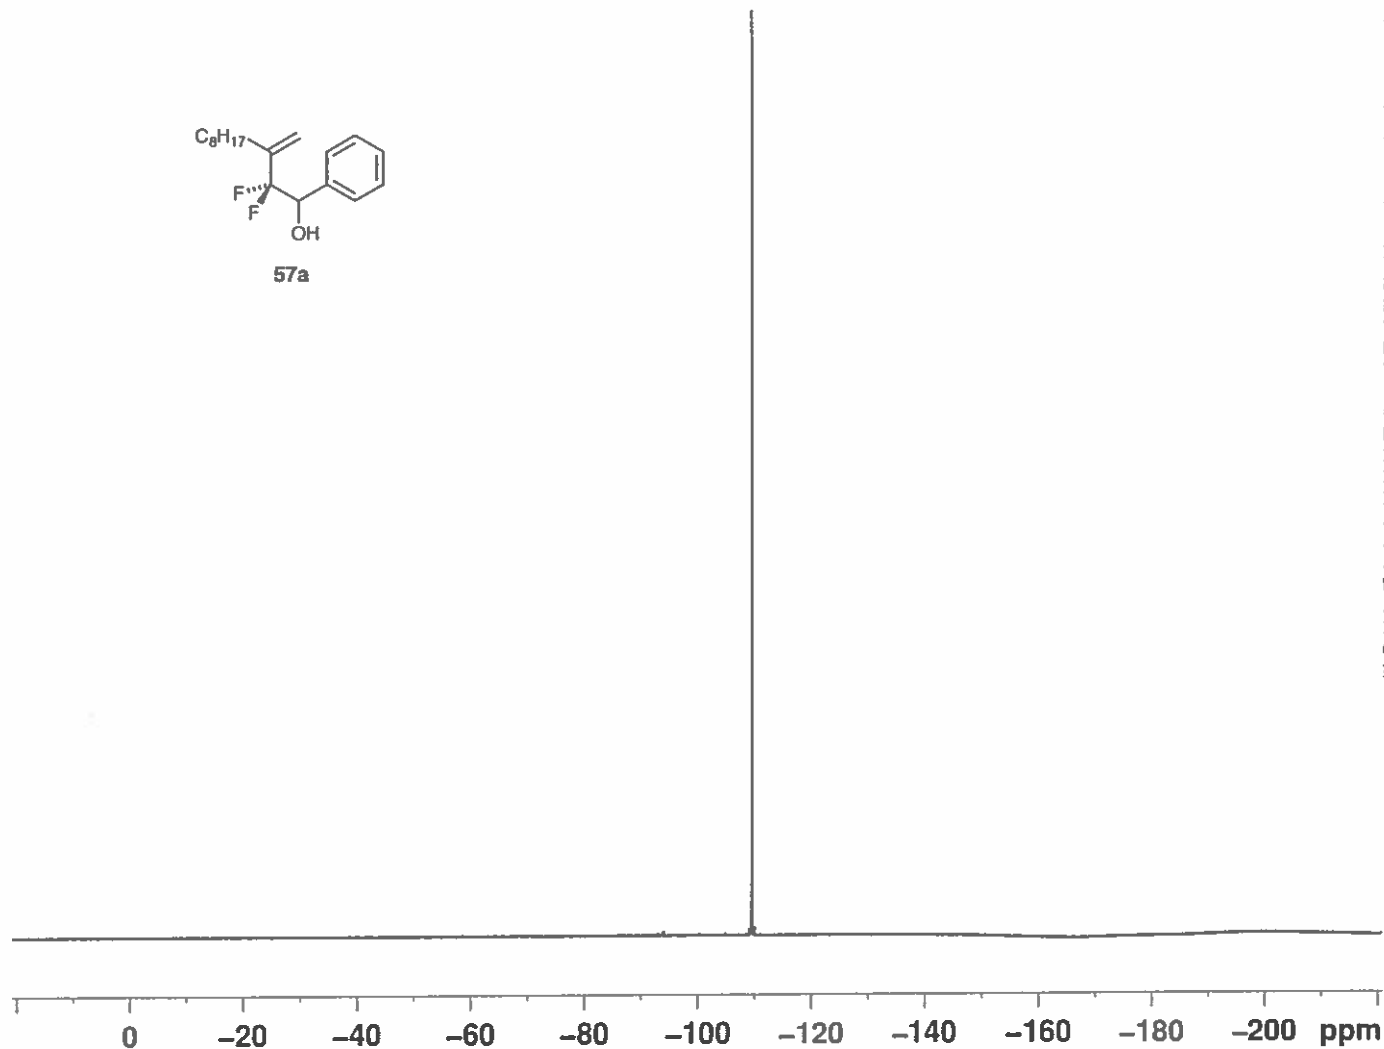

EJT-PRM123B prod data  
mPROTON CDCl<sub>3</sub> /opt/oldbruk500data.11vii11/2014/Feb ejt 25

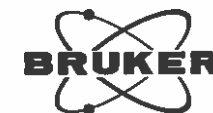

NAME 2014-02-10-ejt-25  
EXPNO 10  
PROCNO 1  
Date\_ 20140210  
Time 17.45  
INSTRUM spect  
PROBHD 5 mm PABBO BB-  
PULPROG zg30b  
TD 65536  
SOLVENT CDCl<sub>3</sub>  
NS 16  
DS 0  
SWH 10330.578 Hz  
FIDRES 0.157632 Hz  
AQ 3.1719923 sec  
RG 20.2  
DW 48.400 usec  
DE 13.00 usec  
TE 294.2 K  
D1 1.00000000 sec  
TD0 1

===== CHANNEL f1 =====  
NUC1 1H  
P1 10.00 usec  
PL1 -0.10 dB  
PL1W 26.21803665 W  
SFO1 500.1330885 MHz  
SI 32768  
SF 500.1300522 MHz  
WDW EM  
SSB 0  
LB 0.30 Hz  
GB 0  
PC 1.00

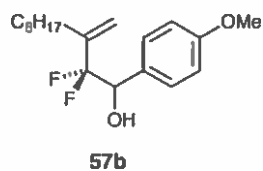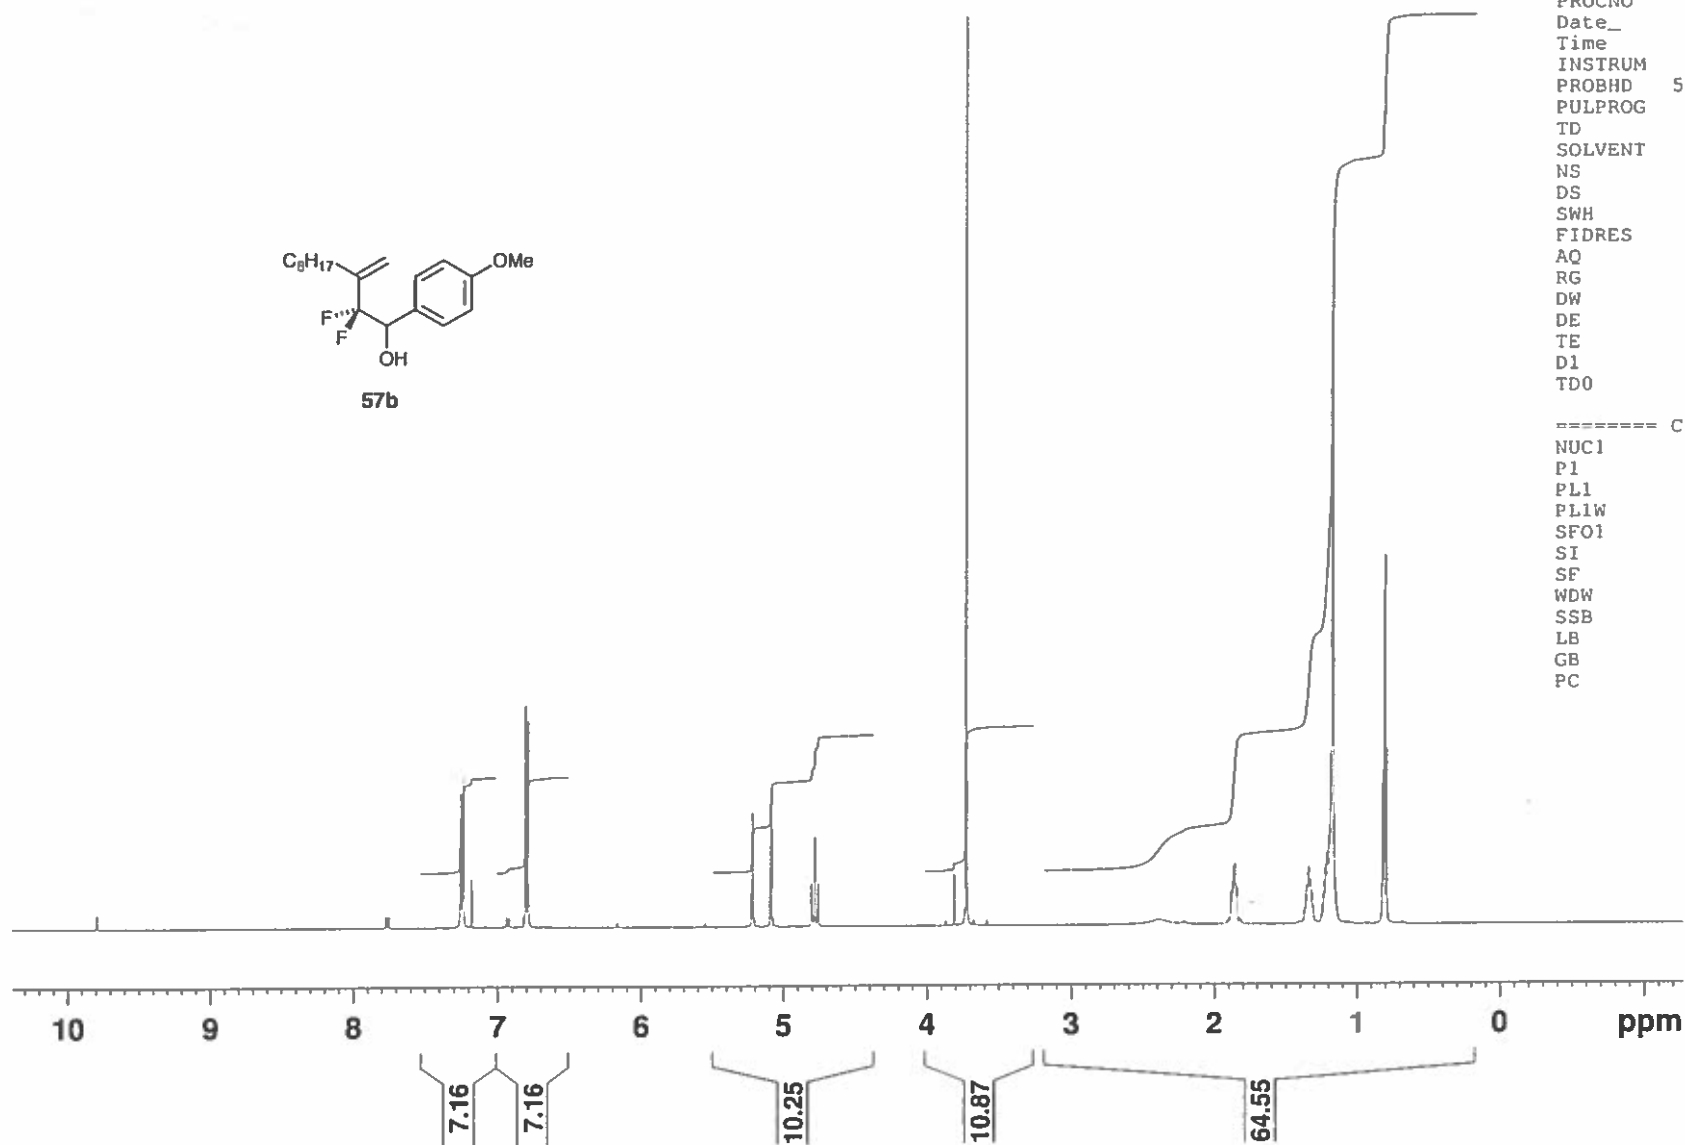

EJT-PRM123B prod data

mCARBON\_B CDCl3 (e:\bruk400\data\2014 Feb\ejt40

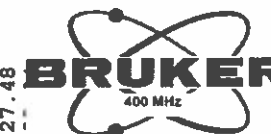

Current Data Parameters  
NAME 2014-02-10-ejt-40  
EXPNO 10  
PROCNO 1

F2 - Acquisition Parameters  
Date\_ 20140211  
Time 21.30  
INSTRUM spect  
PROBHD 5 mm CFPBBO BB  
PULPROG zgpg30  
TD 65536  
SOLVENT CDCl3  
NS 1024  
DS 4  
SWH 24038.461 Hz  
FIDRES 0.366798 Hz  
AQ 1.3631488 sec  
RG 45.2  
DW 20.800 usec  
DE 41.77 usec  
TE 298.0 K  
D1 2.00000000 sec  
D11 0.03000000 sec  
TDO 1

===== CHANNEL f1 =====  
SFO1 100.6077379 MHz  
NUC1 13C  
P1 10.00 usec  
PLW1 33.00000000 W

===== CHANNEL f2 =====  
SFO2 400.0716003 MHz  
NUC2 1H  
CPDPRGf2 waltz16  
PCPD2 80.00 usec  
PLW2 7.40000010 W  
PLW12 0.17209999 W  
PLW13 0.11014000 W

F2 - Processing parameters  
SI 32768  
SF 100.5976815 MHz  
WDW EM  
SSB 0  
LB 1.00 Hz  
GB 0  
PC 1.40

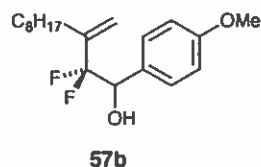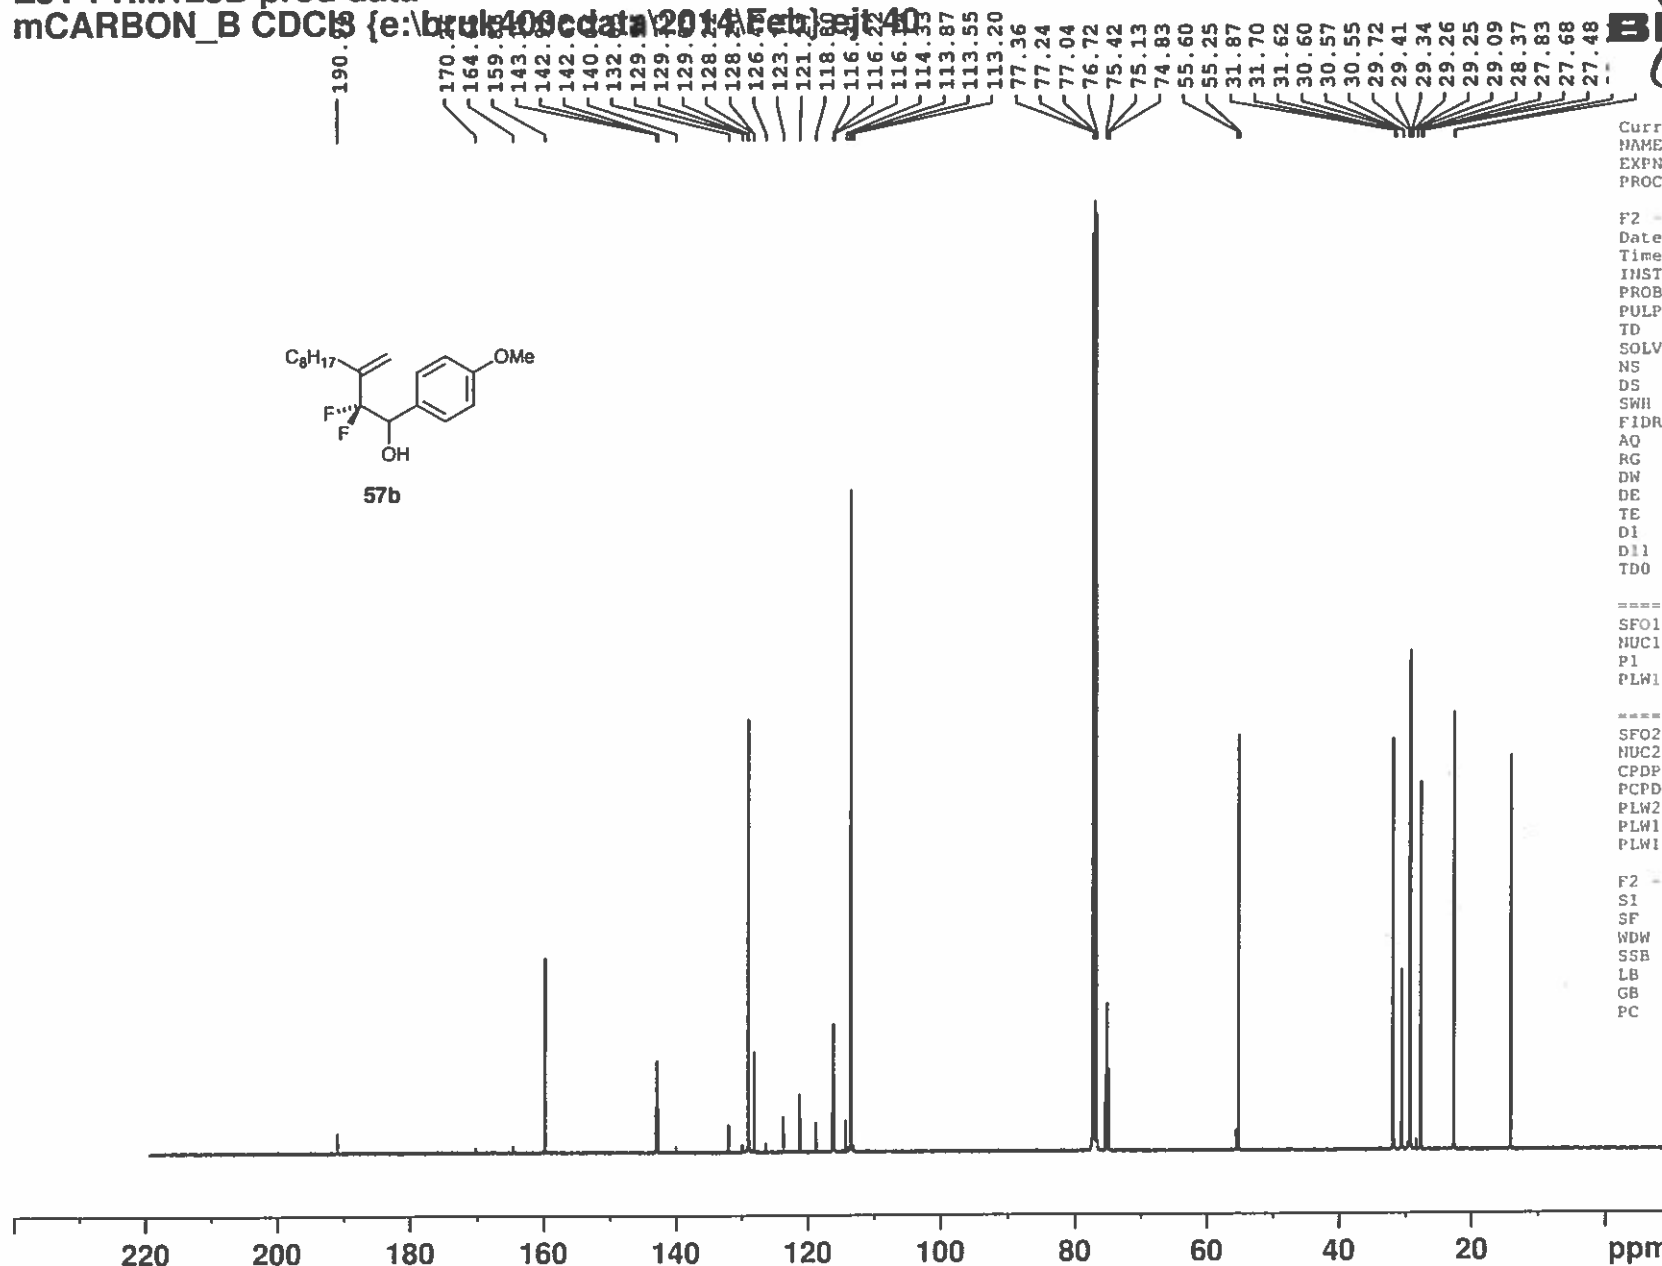

EJT-PRM123B prod data  
 m19FCPD CDC13 /opt/oldbruk500data.11vii11/2014/Feb ejt 25

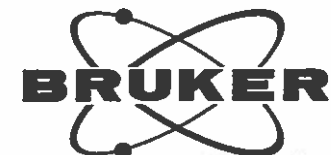

NAME 2014-02-10-ejt-25  
 EXPNO 12  
 PROCNO 1  
 Date\_ 20140210  
 Time 17.50  
 INSTRUM spect  
 PROBHD 5 mm PABBO BB-  
 PULPROG zgfhiggn  
 TD 131072  
 SOLVENT CDC13  
 NS 16  
 DS 4  
 SWH 113636.367 Hz  
 FIDRES 0.866977 Hz  
 AQ 0.5767668 sec  
 RG 32  
 DW 4.400 usec  
 DE 6.50 usec  
 TE 294.3 K  
 D1 1.00000000 sec  
 D11 0.03000000 sec  
 D12 0.00002000 sec  
 TD0 1

===== CHANNEL f1 =====  
 NUC1 19F  
 P1 12.38 usec  
 PL1 -0.10 dB  
 PL1W 25.70395851 W  
 SFO1 470.5453180 MHz

===== CHANNEL f2 =====  
 CPDPRG2 waltz16  
 NUC2 1H  
 PCPD2 80.00 usec  
 PL2 0.00 dB  
 PL12 17.23 dB  
 PL2W 25.62124252 W  
 PL12W 0.48484197 W  
 SFO2 500.1320005 MHz  
 SI 65536  
 SF 470.5923770 MHz  
 WDW EM  
 SSB 0  
 LB 0.30 Hz  
 GB 0  
 PC 1.00

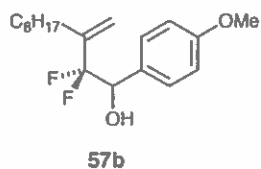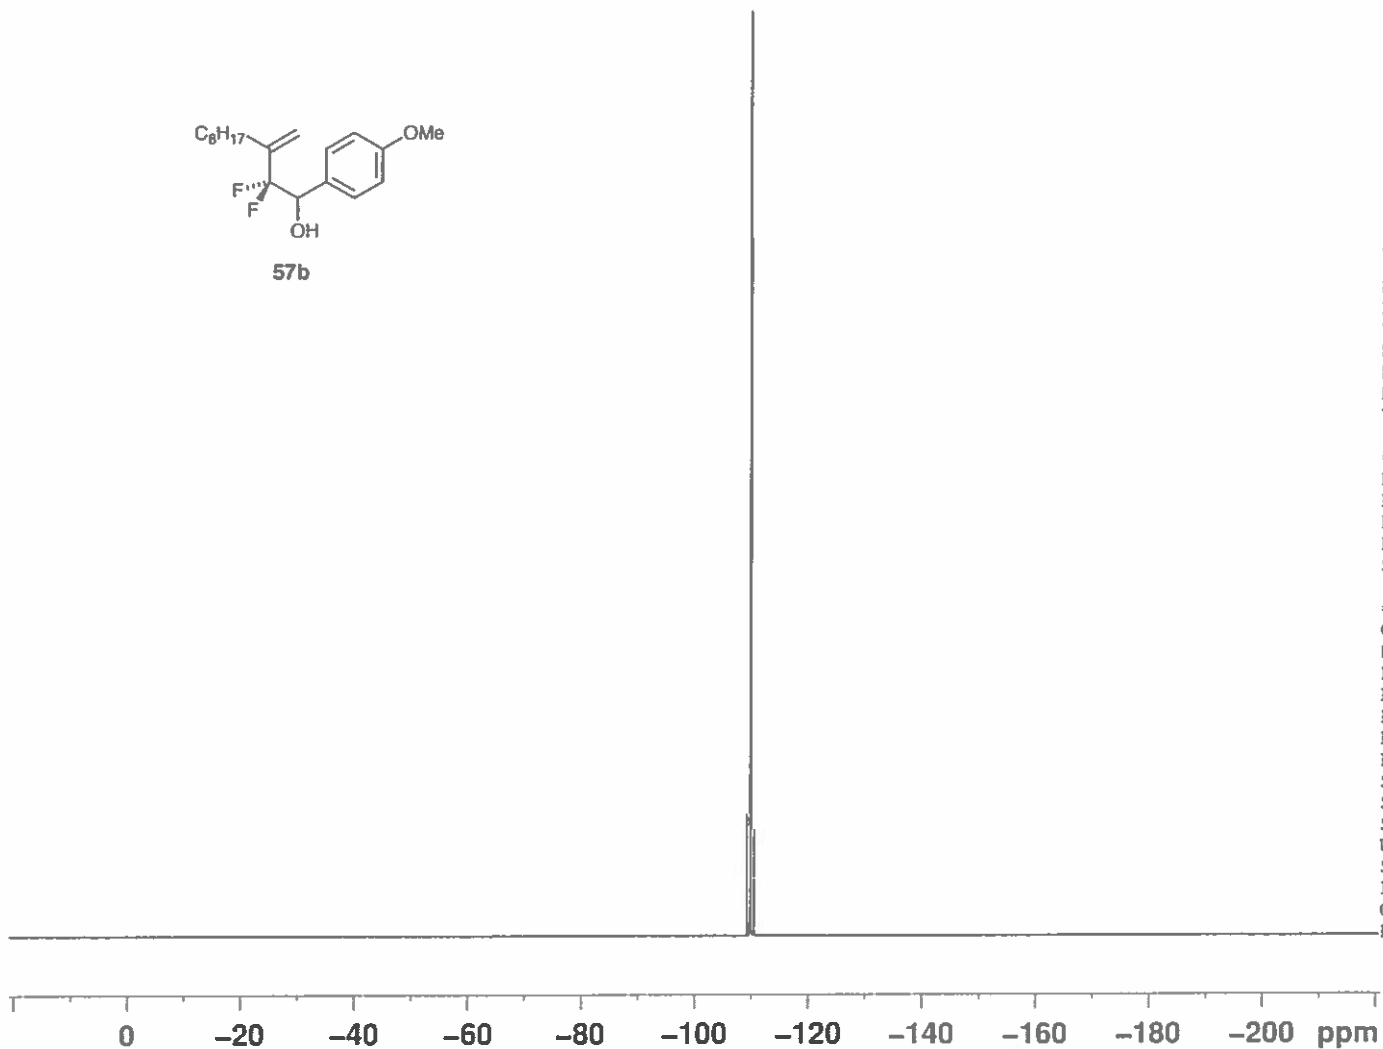

EJT-PRM123C Prod data  
mPROTON\_A\_night CDCl3 {e:\bruk400cdata\2014\Feb} ejt 41

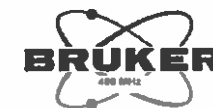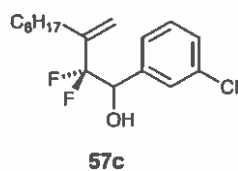

Current Data Parameters  
NAME 2014-02-10-ejt-41  
EXPNO 21  
PROCNO 1

F2 - Acquisition Parameters  
Date\_ 20140211  
Time 23.18  
INSTRUM spect  
PROBHD 5 mm CPPBBO BB  
PULPROG zg30  
TD 65536  
SOLVENT CDCl3  
NS 16  
DS 2  
SWH 8223.685 Hz  
FIDRES 0.125483 Hz  
AQ 3.9845889 sec  
RG 36  
DW 60.800 usec  
DE 10.00 usec  
TE 298.0 K  
D1 1.00000000 sec  
TD0 1

===== CHANNEL f1 =====  
SF01 400.0718803 MHz  
NUC1 1H  
P1 12.00 usec  
PLW1 7.40000010 W

F2 - Processing parameters  
SI 32768  
SF 400.0700000 MHz  
WDW EM  
SSB 0  
LB 0.30 Hz  
GB 0  
PC 1.00

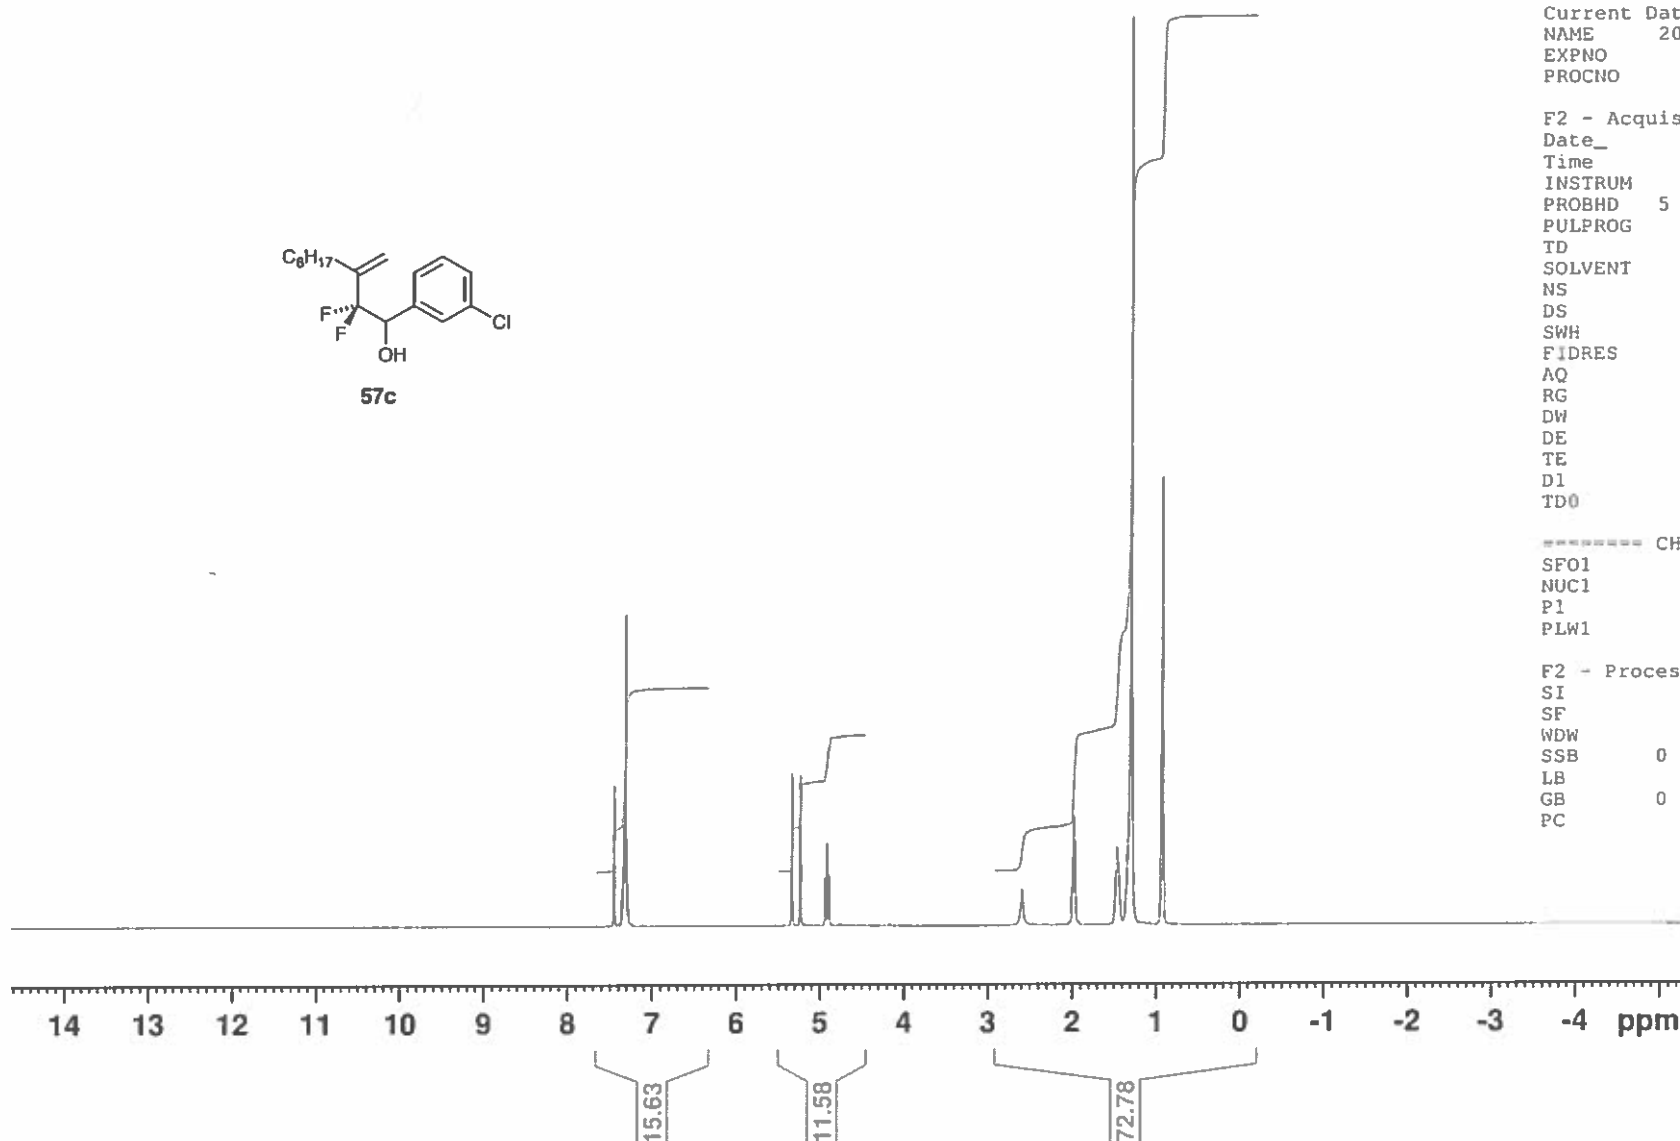

EJT-PRM123C Prod data

mCARBON\_B CDC13 (Bruker 400) data 2014 Feb ejt-41

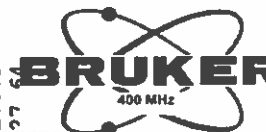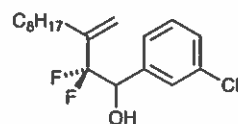

57c

Current Data Parameters  
NAME 2014-02-10-ejt-41  
EXPNO 20  
PROCNO 1

F2 - Acquisition Parameters  
Date\_ 20140211  
Time 23.16  
INSTRUM spect  
PROBHD 5 mm CPPBBO BB  
PULPROG zgpg30  
TD 65536  
SOLVENT CDC13  
NS 1024  
DS 4  
SWH 24038.461 Hz  
FIDRES 0.366798 Hz  
AQ 1.3631488 sec  
RG 71.8  
DW 20.800 usec  
DE 41.77 usec  
TE 298.0 K  
D1 2.00000000 sec  
D11 0.03000000 sec  
TD0 1

===== CHANNEL f1 =====  
SFO1 100.6077379 MHz  
NUC1 13C  
P1 10.00 usec  
PLW1 33.00000000 W

===== CHANNEL f2 =====  
SFO2 400.0716003 MHz  
NUC2 1H  
CPDPRGf2 waltz16  
PCPD2 80.00 usec  
PLW2 7.40000010 W  
PLW12 0.17209999 W  
PLW13 0.11014000 W

F2 - Processing parameters  
SI 32768  
SF 100.5976815 MHz  
WDW EM  
SSB 0  
LB 1.00 Hz  
GB 0  
PC 1.40

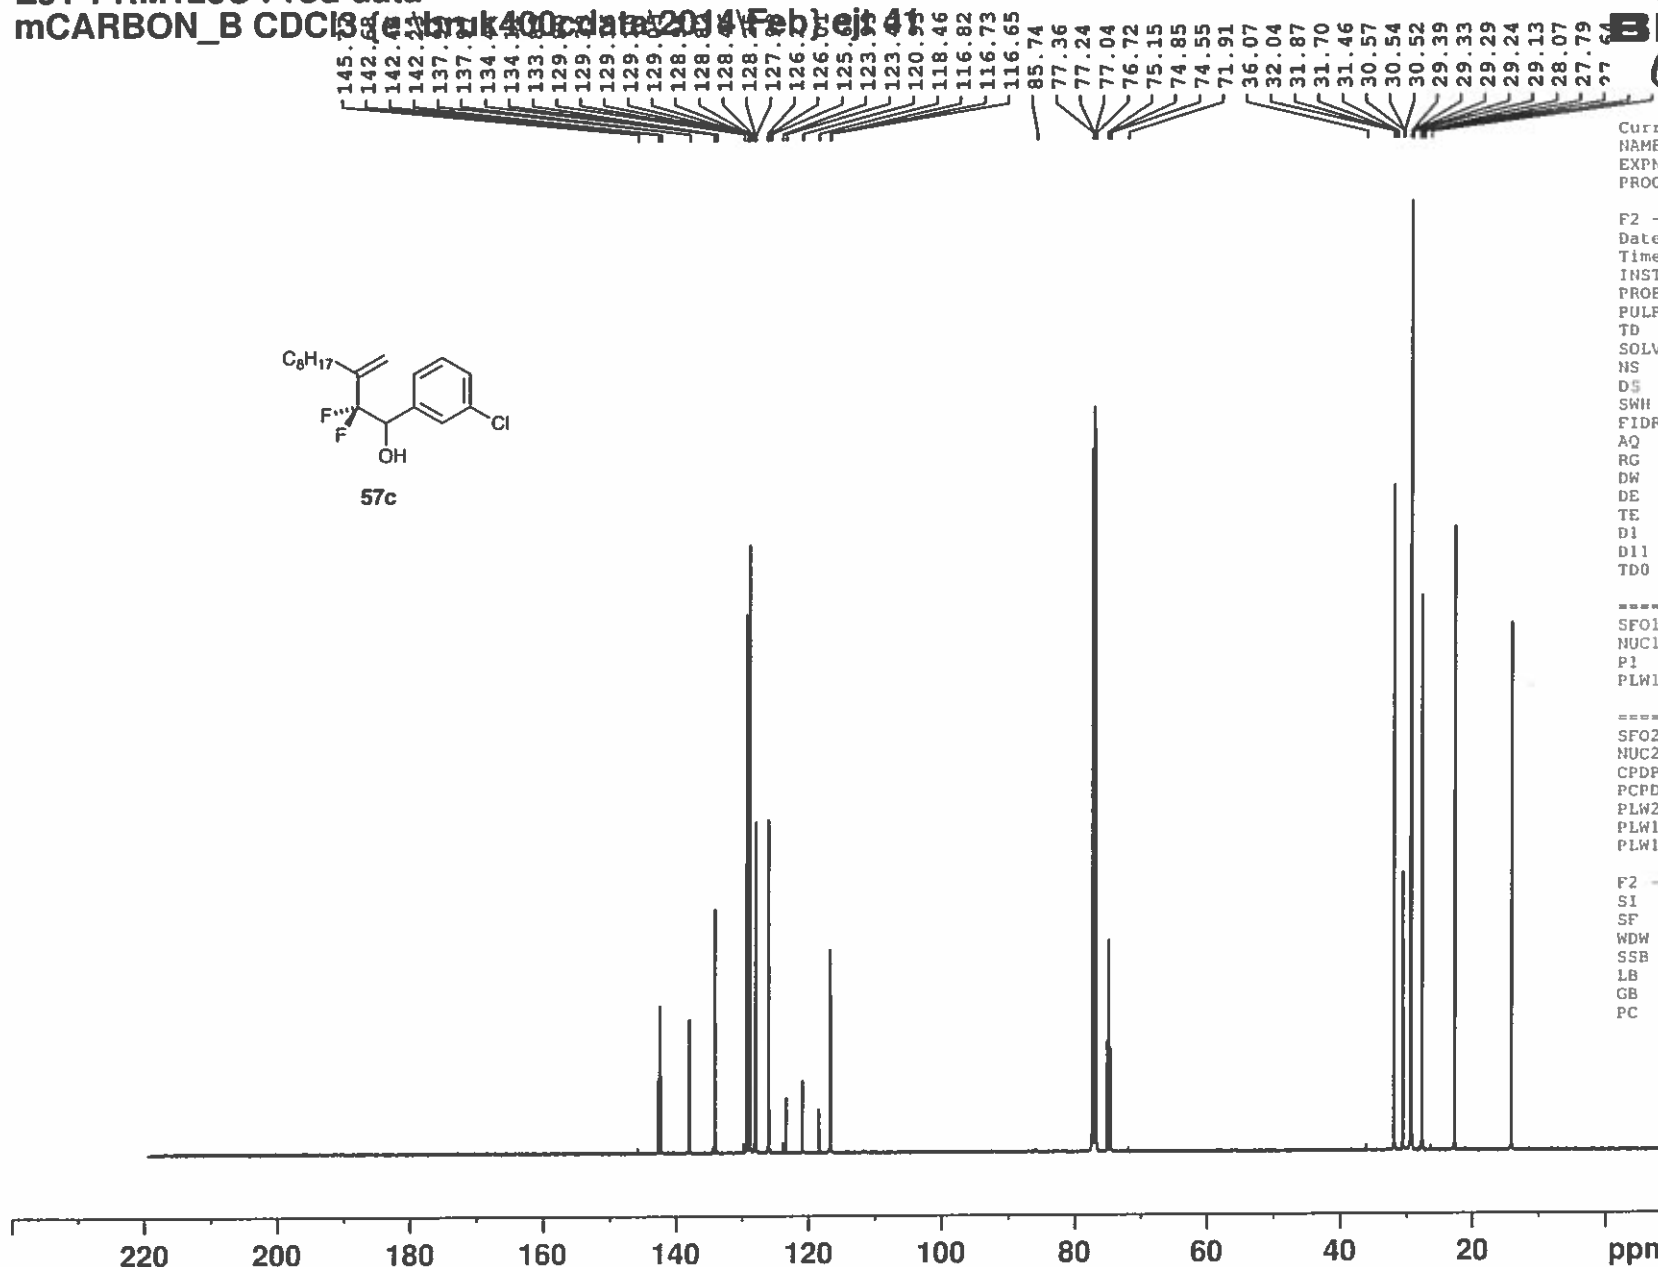

|                        |                                                                                                                            |                   |                                                                            |                        |              |                      |             |
|------------------------|----------------------------------------------------------------------------------------------------------------------------|-------------------|----------------------------------------------------------------------------|------------------------|--------------|----------------------|-------------|
| Acquisition Time (sec) | 0.5767                                                                                                                     | Comment           | EJT-PRM123C prod m19FCPD CDCI3 /opt/oldbruk500data.11vii11/2014/Feb ejt 10 |                        |              |                      |             |
| Date                   | 11 Feb 2014 09:33:52                                                                                                       | Date Stamp        | 11 Feb 2014 09:33:52                                                       |                        |              |                      |             |
| File Name              | \\ss7a.ds.man.ac.uk\vol5\VOL3\USERS\SNMRDATA\BRUK500DATA\BRUK500DATA\2014\FEB\DATA\EJT\NMR\2014-02-11-EJT-10\12\PDATA\111R |                   |                                                                            |                        |              |                      |             |
| Frequency (MHz)        | 470.59                                                                                                                     | Nucleus           | 19F                                                                        | Number of Transients   | 16           | Origin               | spect       |
| Original Points Count  | 65536                                                                                                                      | Owner             | vnmr1                                                                      | Points Count           | 65536        | Pulse Sequence       | zgfhggn     |
| Receiver Gain          | 32.00                                                                                                                      | SW(cyclical) (Hz) | 113636.37                                                                  | Solvent                | CHLOROFORM-d | Spectrum Offset (Hz) | -47059.0234 |
| Spectrum Type          | STANDARD                                                                                                                   | Sweep Width (Hz)  | 113634.63                                                                  | Temperature (degree C) | 21.184       |                      |             |

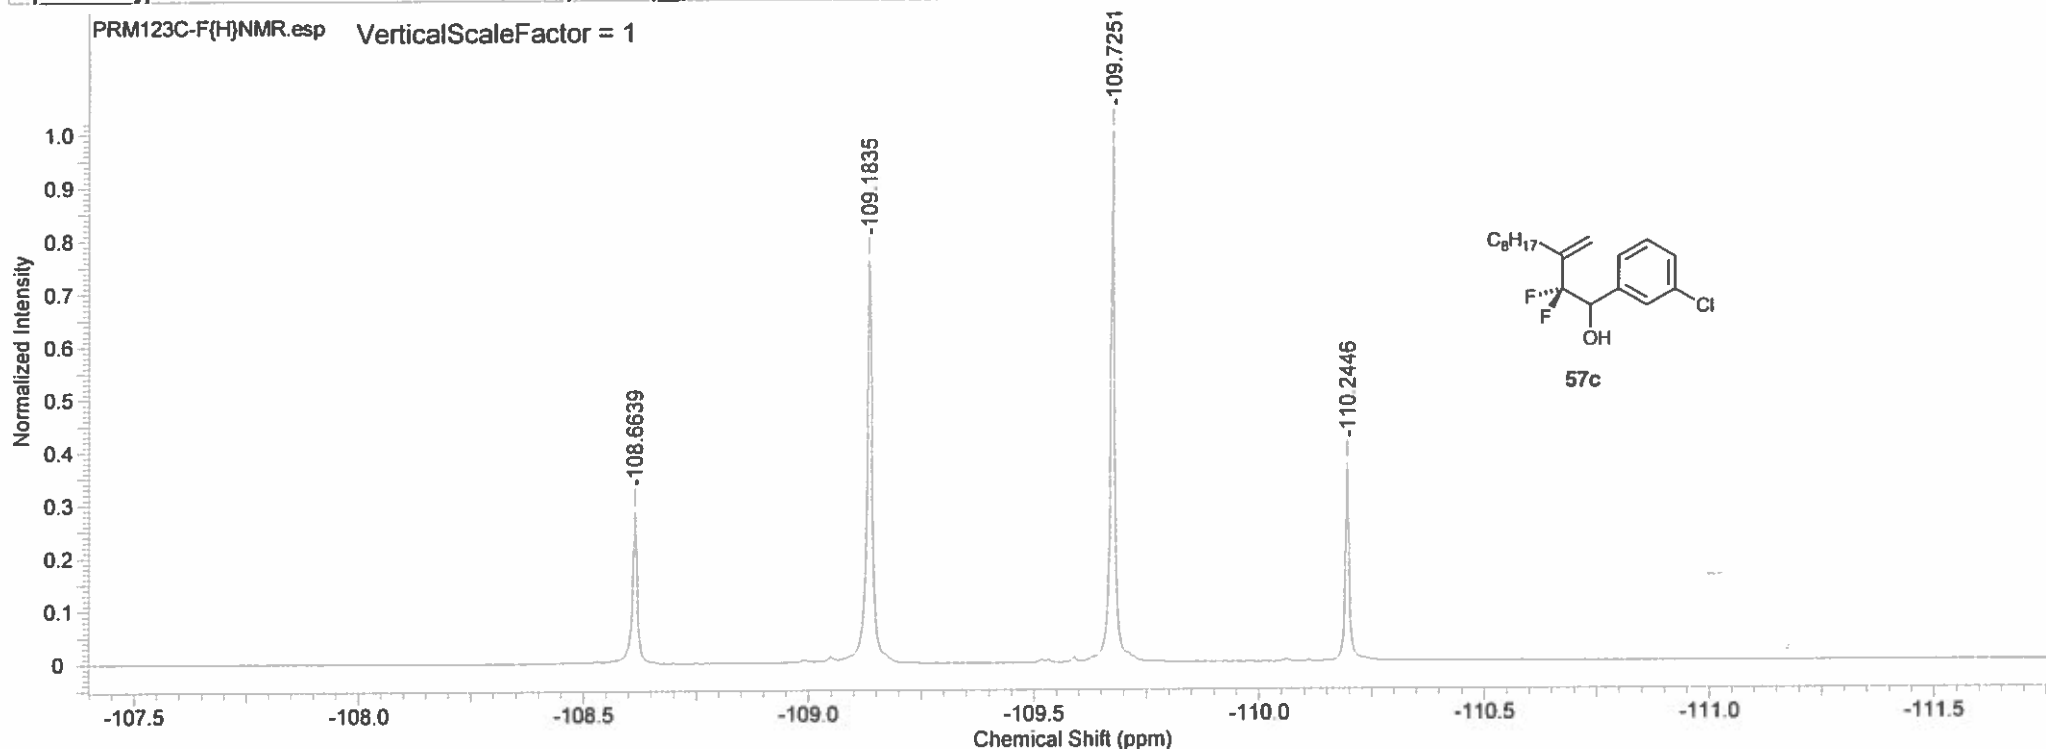

| No. | (ppm)   | (Hz)     | Height |
|-----|---------|----------|--------|
| 1   | -110.24 | -51880.3 | 0.3719 |
| 2   | -109.73 | -51635.8 | 1.0000 |
| 3   | -109.18 | -51380.9 | 0.7599 |
| 4   | -108.66 | -51136.4 | 0.2865 |

EJT-PRM123D prod f12-26 48mg  
mPROTON CDCl3 {e:\bruk400data\2014\Feb} ejt 27

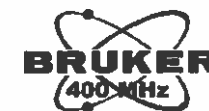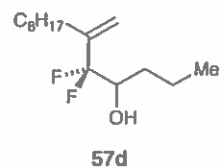

NAME 2014-02-14-ejt-27  
EXPNO 10  
PROCNO 1  
Date\_ 20140214  
Time 15.25  
INSTRUM AV400  
PROBHD 5 mm PABBO BB-  
PULPROG zg30b  
TD 65536  
SOLVENT CDCl3  
NS 16  
DS 0  
SWH 8264.463 Hz  
FIDRES 0.126106 Hz  
AQ 3.9649780 sec  
RG 90.5  
DW 60.500 usec  
DE 8.45 usec  
TE 294.0 K  
D1 1.00000000 sec  
TD0 1

===== CHANNEL f1 =====  
NUC1 1H  
P1 14.50 usec  
PL1 -3.60 dB  
PL1W 17.83863831 W  
SFO1 400.1324710 MHz  
SI 32768  
SF 400.1300369 MHz  
WDW EM  
SSB 0  
LB 0.30 Hz  
GB 0  
PC 1.00

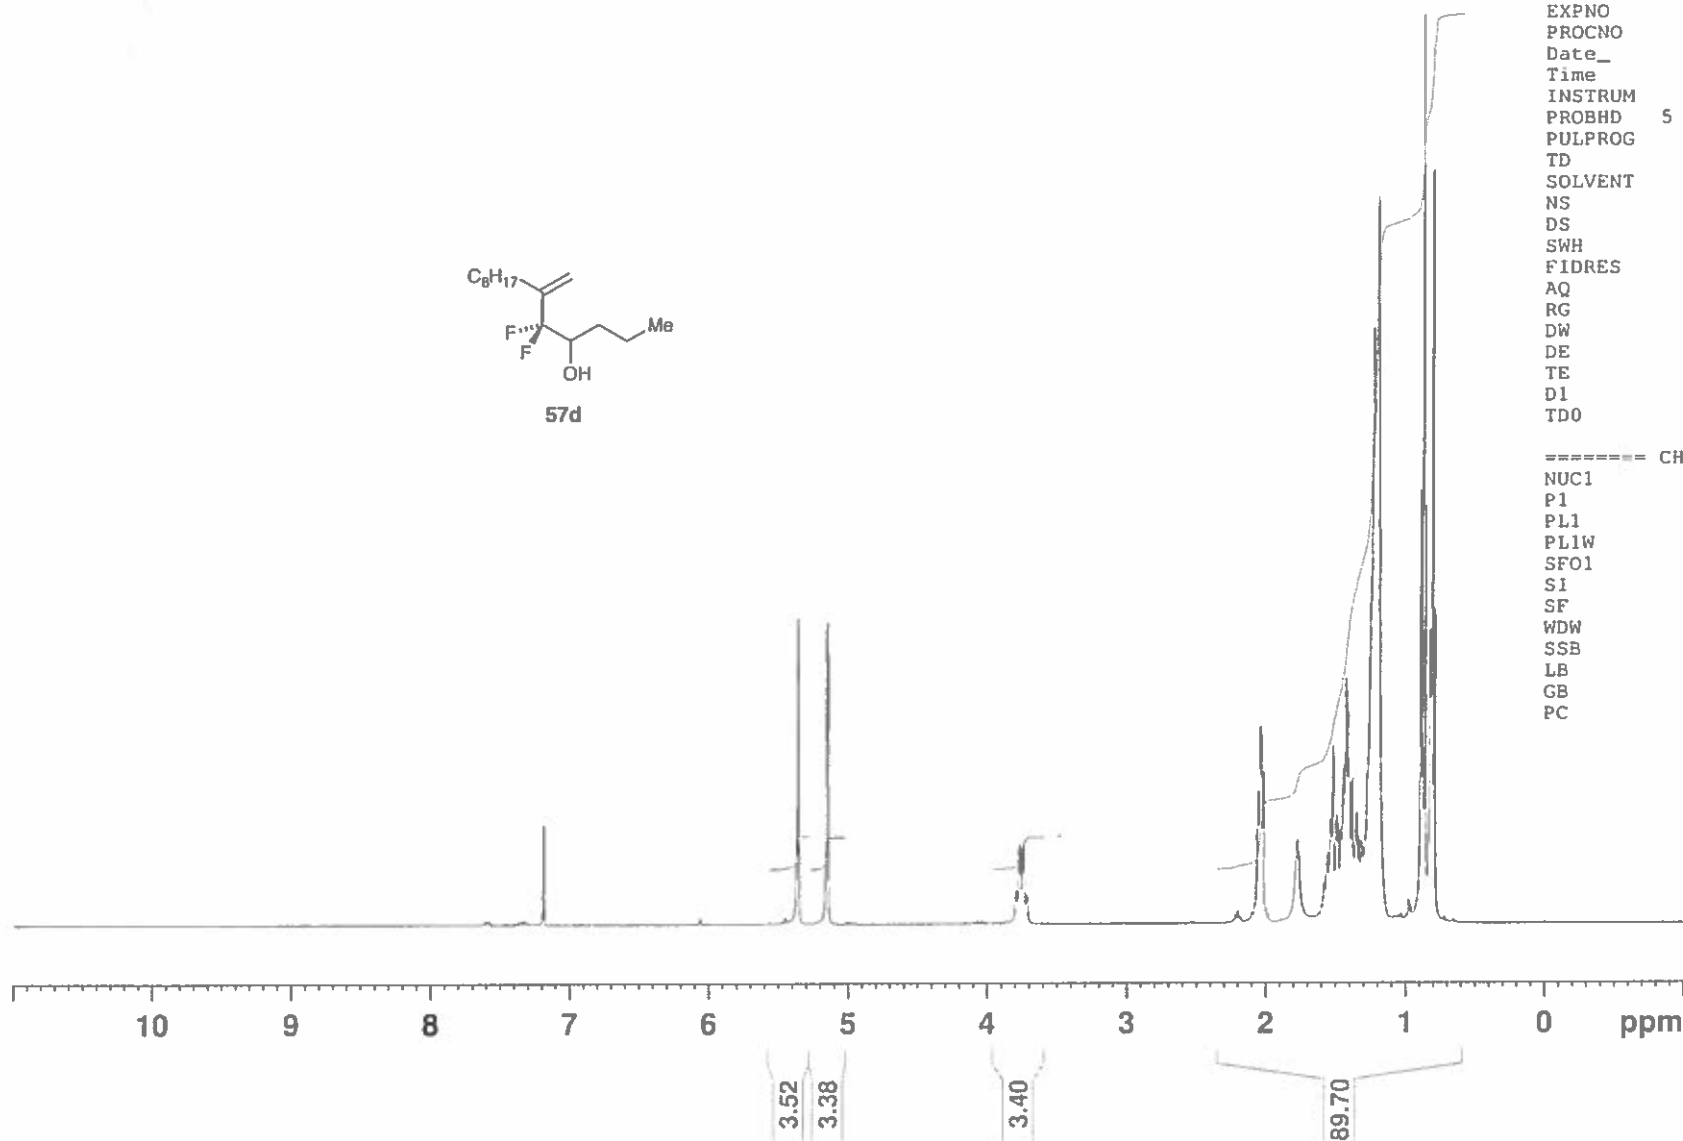



EJT-PRM123D prod data  
mCARBON\_B CDCl3 {e:\bruk400\data\2014\Feb\ejt-14

143.8  
142.8  
142.5  
135.5  
127.8  
124.5  
124.2  
121.1  
119.3  
115.5  
115.4

77.34  
77.22  
77.02  
76.70  
72.65  
72.36  
72.07  
42.57  
36.49  
33.01  
31.92  
31.89  
31.86  
30.55  
30.52  
30.50  
29.43  
29.32  
29.25  
28.46  
27.95  
27.80  
22.83  
22.66  
20.21  
19.04

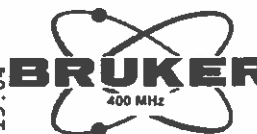

Current Data Parameters  
NAME 2014-02-14-ejt-14  
EXPNO 10  
PROCNO 1

F2 - Acquisition Parameters  
Date\_ 20140215  
Time 4.54  
INSTRUM spect  
PROBHD 5 mm CPPBBO BB  
PULPROG zgpg30  
TD 65536  
SOLVENT CDCl3  
NS 512  
DS 4  
SWH 24038.461 Hz  
FIDRES 0.366798 Hz  
AQ 1.3631488 sec  
RG 71.8  
DW 20.800 usec  
DE 41.77 usec  
TE 298.2 K  
D1 2.00000000 sec  
D11 0.03000000 sec  
TD0 1

----- CHANNEL f1 -----  
SFO1 100.6077379 MHz  
NUC1 13C  
P1 10.00 usec  
PLW1 33.00000000 W

----- CHANNEL f2 -----  
SFO2 400.0716003 MHz  
NUC2 1H  
CPDPRG12 waltz16  
PCPD2 80.00 usec  
PLW2 7.40000010 W  
PLW12 0.17209999 W  
PLW13 0.11014000 W

F2 - Processing parameters  
SI 32768  
SF 100.5976815 MHz  
WDW EM  
SSB 0  
LB 1.00 Hz  
GB 0  
PC 1.40

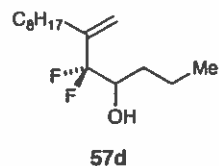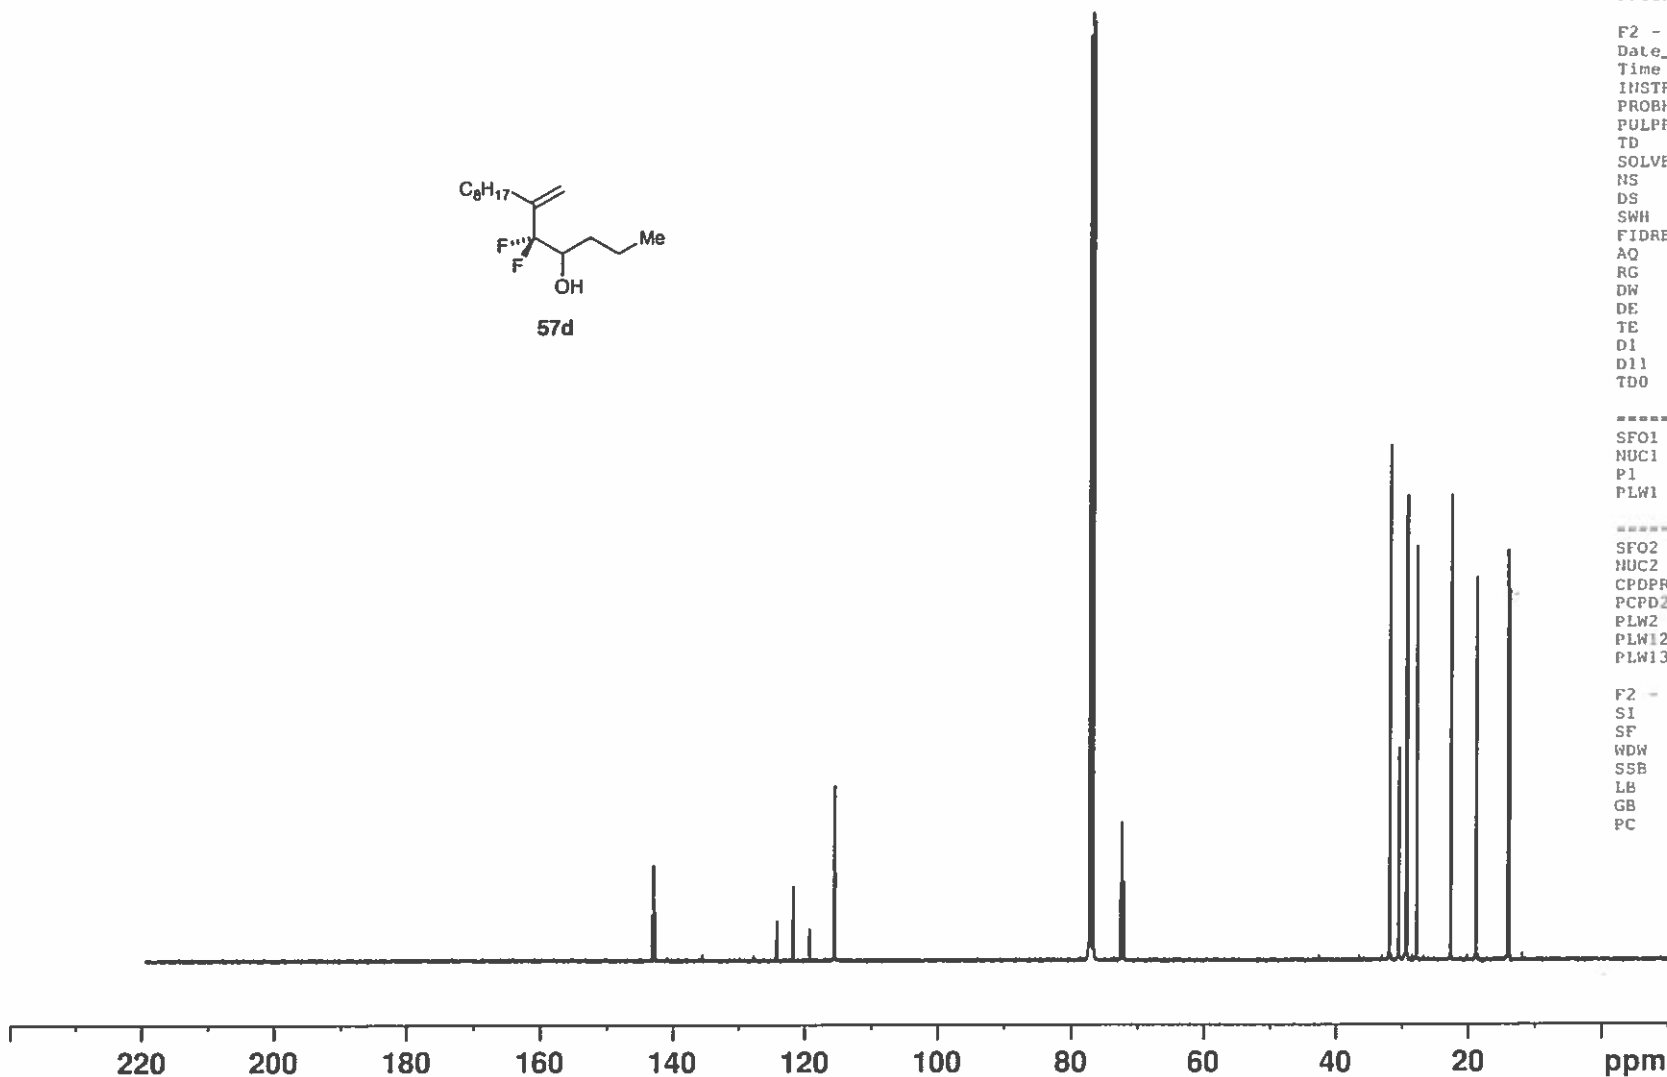

EJT-PRM123D crude 60mg  
m19F CDC13 /opt/oldbruk500data.11vii11/2014/Feb ejt 3

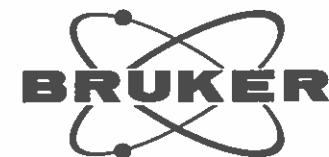

NAME 2014-02-14-ejt-3  
EXPNO 11  
PROCNO 1  
Date\_ 20140214  
Time 11.18  
INSTRUM spect  
PROBHD 5 mm PABBO BB-  
PULPROG zgfg1gn  
TD 131072  
SOLVENT CDC13  
NS 16  
DS 4  
SWH 113636.367 Hz  
FIDRES 0.866977 Hz  
AQ 0.5767668 sec  
RG 203  
DW 4.400 usec  
DE 6.50 usec  
TE 300.0 K  
D1 1.00000000 sec  
TD0 1

===== CHANNEL f1 =====  
NUC1 19F  
P1 12.38 usec  
PL1 -0.10 dB  
PL1W 25.70395851 W  
SFO1 470.5453180 MHz  
S1 65536  
SF 470.5923770 MHz  
WDW EM  
SSB 0  
LB 0.30 Hz  
GB 0  
PC 1.00

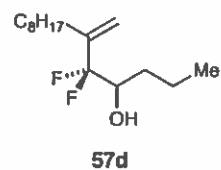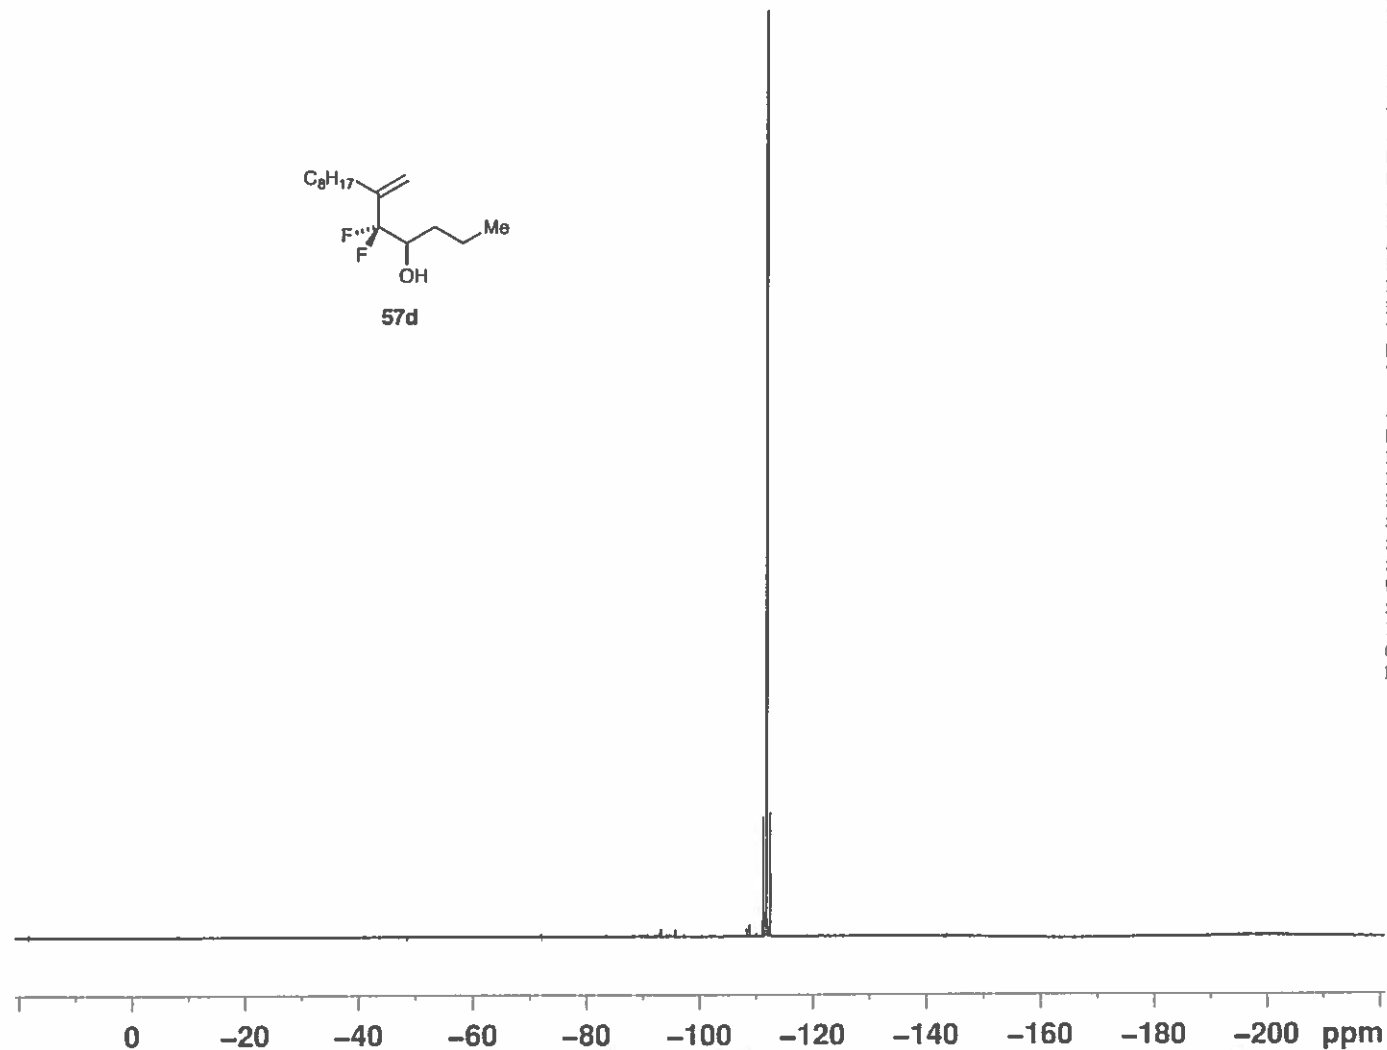

EJT-PRM123G prod data  
mPROTON\_A\_night CDCl3 {e:\bruk400cdata\2014\Feb} ejt 56

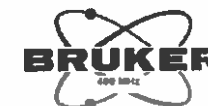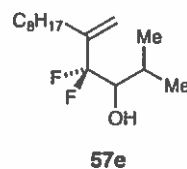

Current Data Parameters  
NAME 2014-02-22-ejt-56  
EXPNO 10  
PROCNO 1

F2 - Acquisition Parameters  
Date\_ 20140223  
Time 10.30  
INSTRUM spect  
PROBHD 5 mm CPPBBO BB  
PULPROG zg30  
TD 65536  
SOLVENT CDCl3  
NS 16  
DS 2  
SWH 8223.685 Hz  
FIDRES 0.125483 Hz  
AQ 3.9845889 sec  
RG 45.2  
DW 60.800 usec  
DE 10.00 usec  
TE 298.0 K  
D1 1.00000000 sec  
TD0 1

===== CHANNEL f1 =====  
SFO1 400.0718803 MHz  
NUC1 1H  
P1 12.00 usec  
PLW1 7.40000010 W

F2 - Processing parameters  
SI 32768  
SF 400.0700371 MHz  
WDW EM  
SSB 0  
LB 0.30 Hz  
GB 0  
PC 1.00

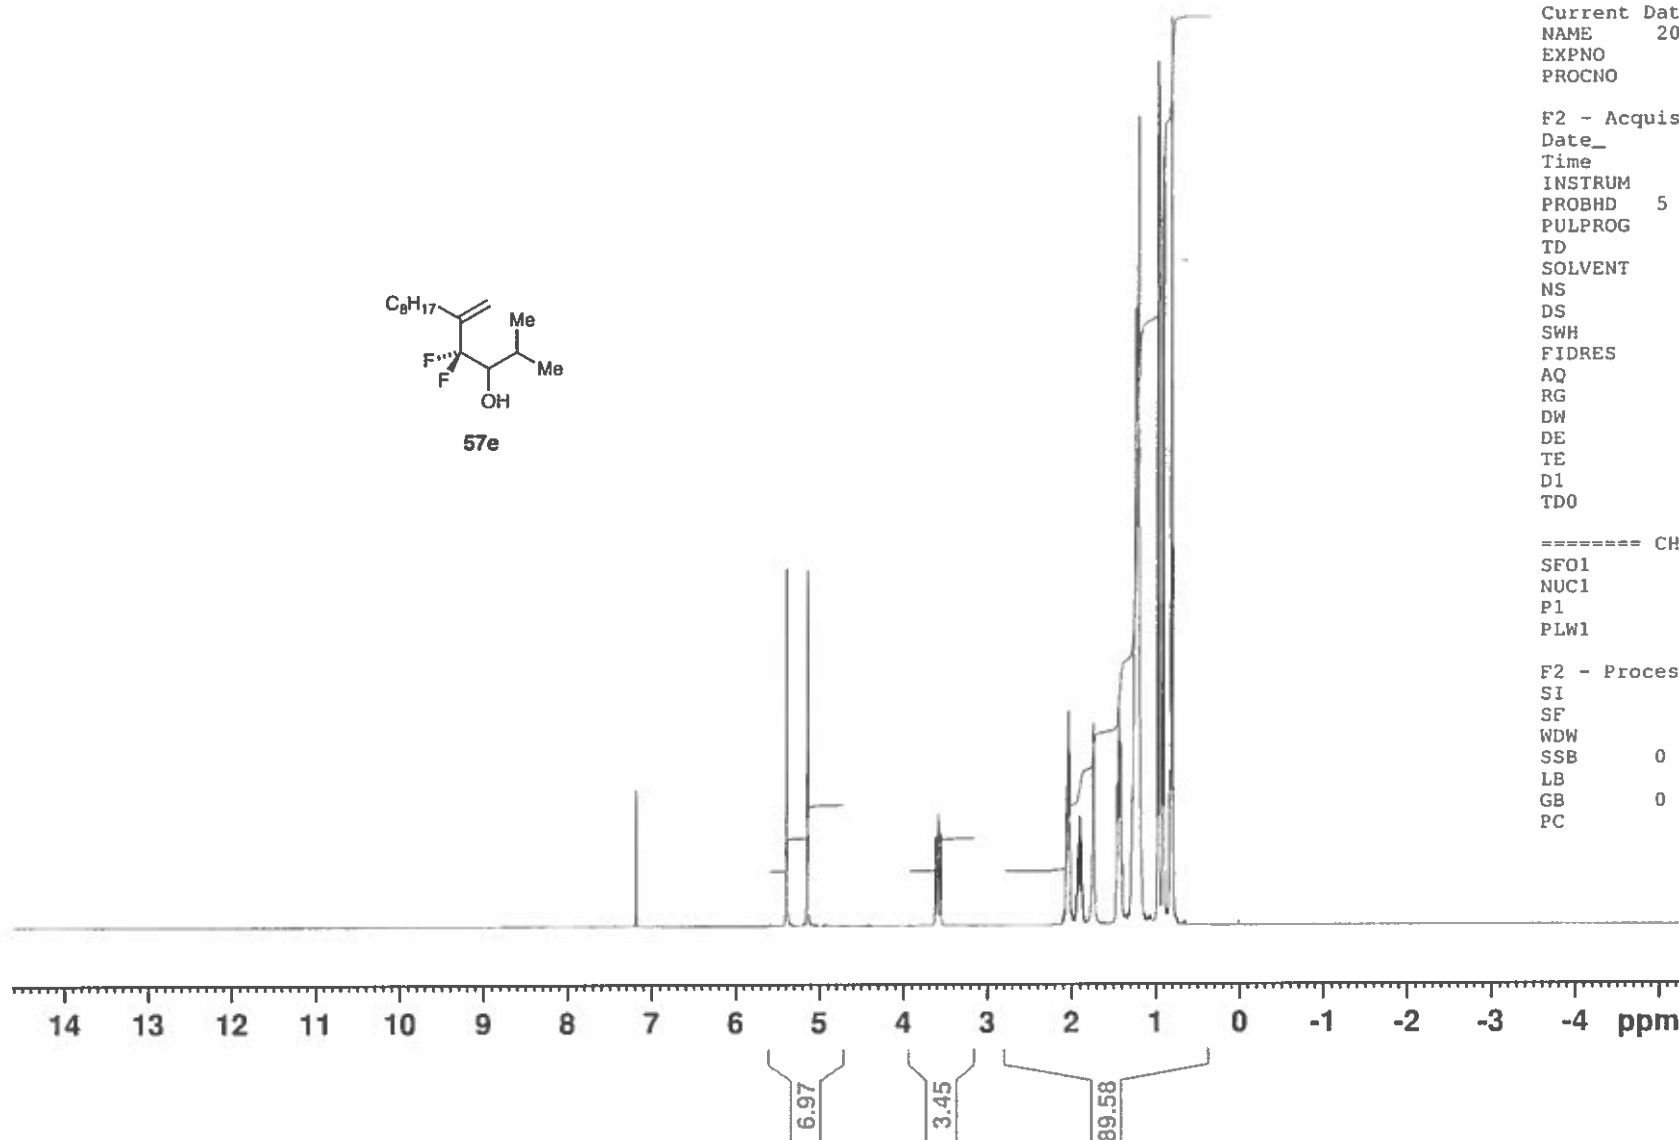

EJT-PRM123G prod data  
mCARBON\_B CDCl3 {e:\bruk400cdata\2014\Feb\ejt-56

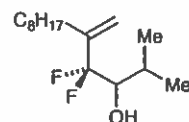

57e

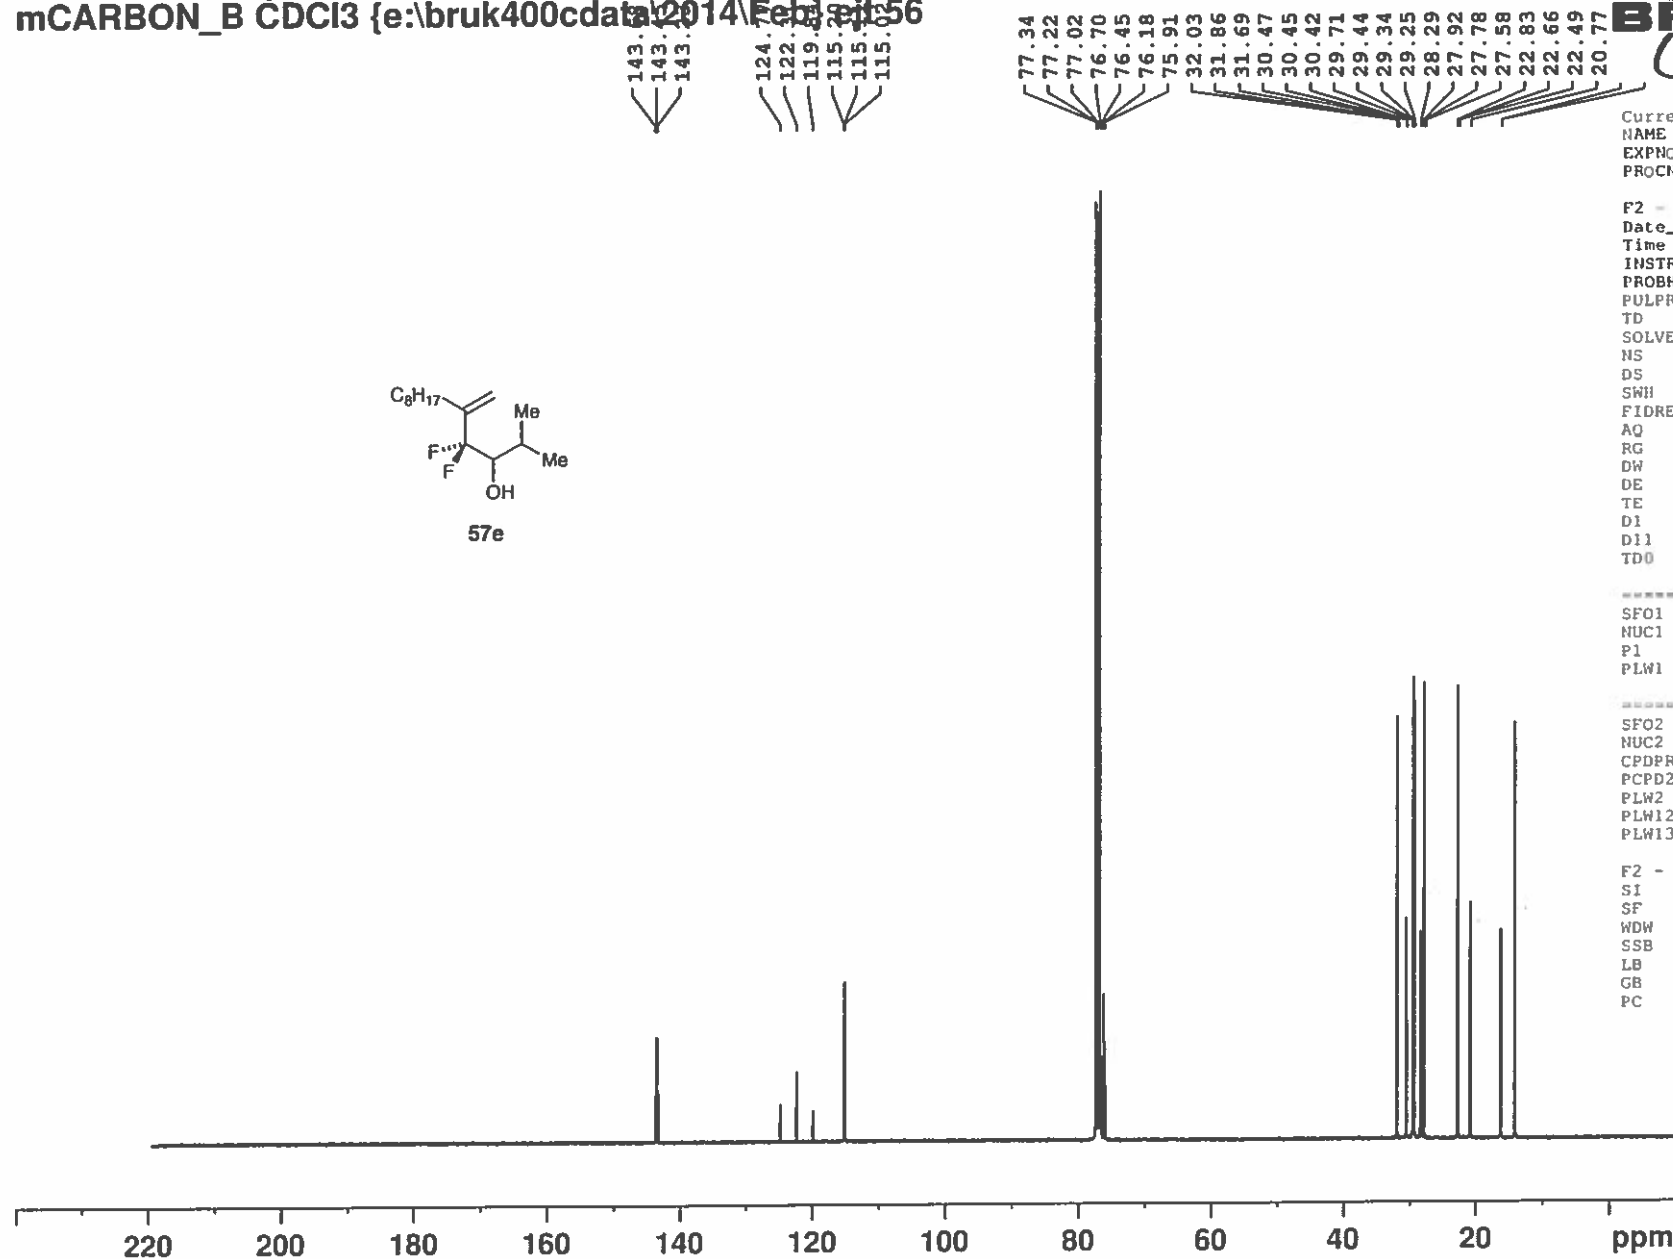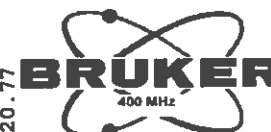

Current Data Parameters  
NAME 2014-02-22-ejt-56  
EXPNO 11  
PROCNO 1

F2 - Acquisition Parameters  
Date\_ 20140223  
Time 11.30  
INSTRUM spect  
PROBHD 5 mm CPPBBO BB  
PULPROG zgpg30  
TD 65536  
SOLVENT CDCl3  
NS 1024  
DS 4  
SWH 24038.461 Hz  
FIDRES 0.366798 Hz  
AQ 1.3631488 sec  
RG 71.8  
DW 20.800 usec  
DE 41.77 usec  
TE 298.0 K  
D1 2.00000000 sec  
D11 0.03000000 sec  
TD0 1

===== CHANNEL f1 =====  
SFO1 100.6077379 MHz  
NUC1 13C  
P1 10.00 usec  
PLW1 33.00000000 W

===== CHANNEL f2 =====  
SFO2 400.0716003 MHz  
NUC2 1H  
CPDPRG2 waltz16  
PCPD2 80.00 usec  
PLW2 7.40000010 W  
PLW12 0.17209999 W  
PLW13 0.11014000 W

F2 - Processing parameters  
SI 32768  
SF 100.5976815 MHz  
WDW EM  
SSB 0  
LB 1.00 Hz  
GB 0  
PC 1.40

|                        |                                                                                                                |                        |                                                                            |                      |                 |                       |          |
|------------------------|----------------------------------------------------------------------------------------------------------------|------------------------|----------------------------------------------------------------------------|----------------------|-----------------|-----------------------|----------|
| Acquisition Time (sec) | 0.5767                                                                                                         | Comment                | EJT-PRM123G prod m19FCPD CDCl3 /opt/oldbruk500data.11vii11/2014/Feb ejt 56 |                      |                 |                       |          |
| Date                   | 23 Feb 2014 18:54:56                                                                                           | Date Stamp             | 23 Feb 2014 18:54:56                                                       |                      |                 |                       |          |
| File Name              | \\ss7a.ds.man.ac.uk\vol3\users\snmrdata\bruk500data\bruk500data\2014\Feb\data\ejt\nmr\2014-02-23-ejt-56\12\fid |                        |                                                                            |                      | Frequency (MHz) | 470.59                |          |
| Nucleus                | 19F                                                                                                            | Number of Transients   | 16                                                                         | Origin               | spect           | Original Points Count | 65536    |
| Owner                  | vnmr1                                                                                                          | Points Count           | 65536                                                                      | Pulse Sequence       | zgfhgqn         | Receiver Gain         | 32.00    |
| SW(cyclical) (Hz)      | 113636.37                                                                                                      | Solvent                | CHLOROFORM-d                                                               | Spectrum Offset (Hz) | -47059.0234     | Spectrum Type         | STANDARD |
| Sweep Width (Hz)       | 113634.63                                                                                                      | Temperature (degree C) | 27.000                                                                     |                      |                 |                       |          |

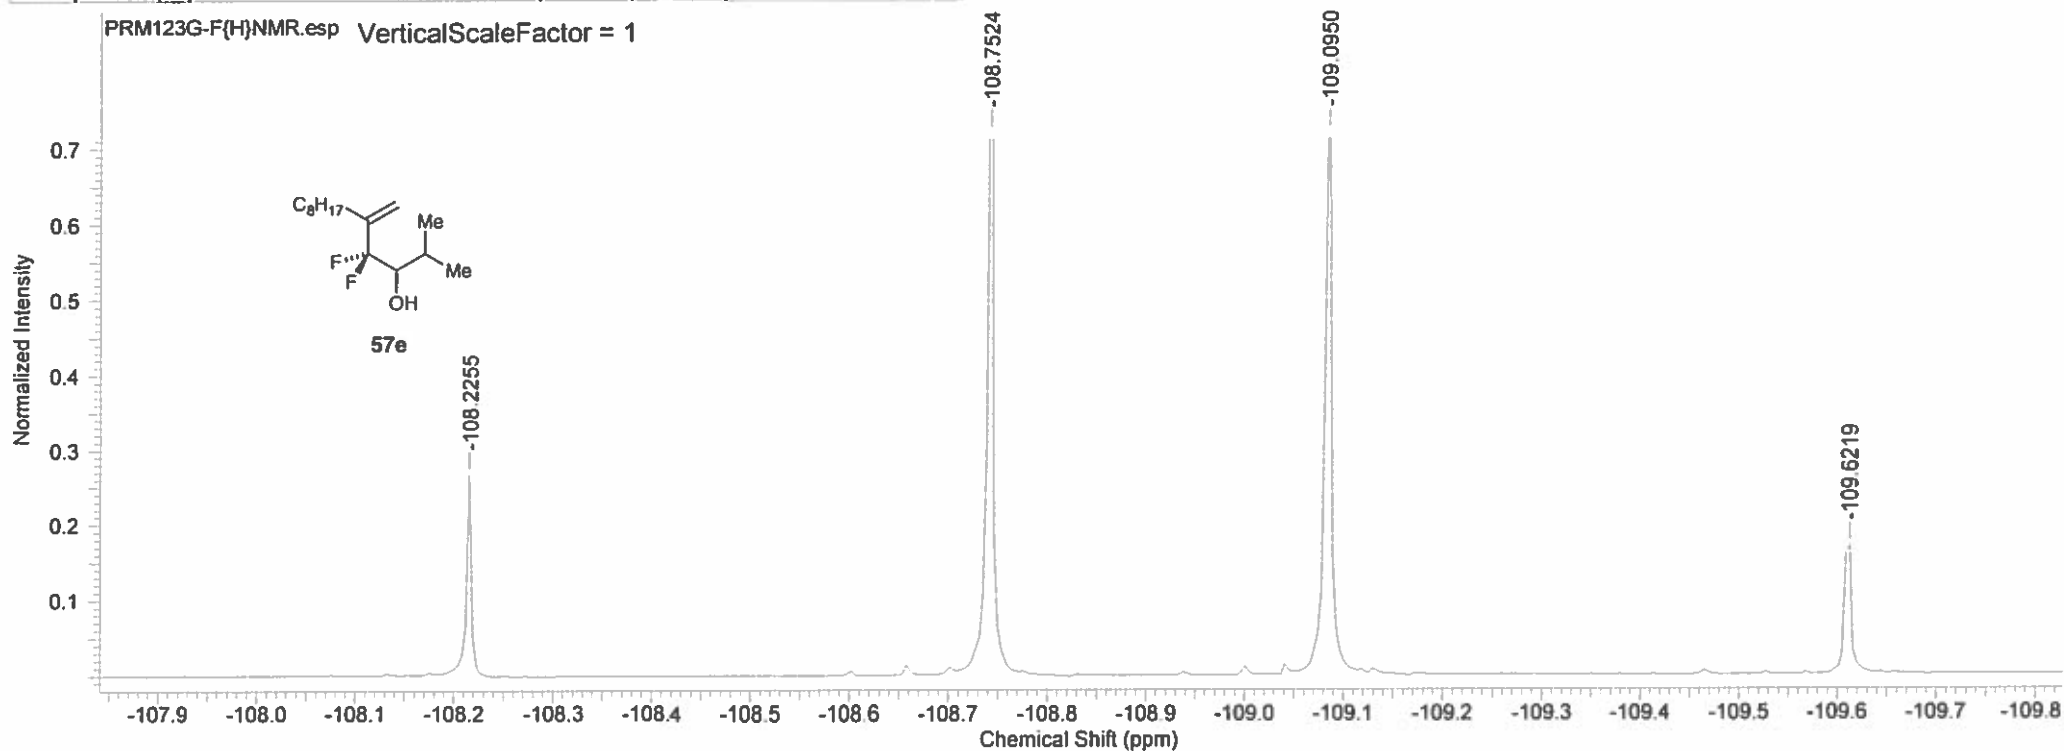

| No. | (ppm)   | (Hz)     | Height |
|-----|---------|----------|--------|
| 1   | -109.62 | -51587.2 | 0.1688 |
| 2   | -109.10 | -51339.3 | 0.8761 |
| 3   | -108.75 | -51178.0 | 1.0000 |
| 4   | -108.23 | -50930.1 | 0.2675 |

EJT-PRM123E f8-15 24mg  
mPROTON CDCl3 /opt/oldbruk500data.11vii11/2014/Jan ejt 29

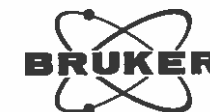

NAME 2014-01-28-ejt-29  
EXPNO 10  
PROCNO 1  
Date\_ 20140128  
Time 16.14  
INSTRUM spect  
PROBHD 5 mm PABBO BB-  
PULPROG zg30b  
TD 65536  
SOLVENT CDCl3  
NS 16  
DS 0  
SWH 10330.578 Hz  
FIDRES 0.157632 Hz  
AQ 3.171923 sec  
RG 25.4  
DW 48.400 usec  
DE 13.00 usec  
TE 300.0 K  
D1 1.00000000 sec  
TD0 1

===== CHANNEL f1 =====  
NUC1 1H  
P1 10.00 usec  
PL1 -0.10 dB  
PL1W 26.21803665 W  
SF01 500.1330885 MHz  
SI 32768  
SF 500.1300482 MHz  
WDW EM  
SSB 0  
LB 0.30 Hz  
GB 0  
PC 1.00

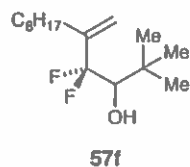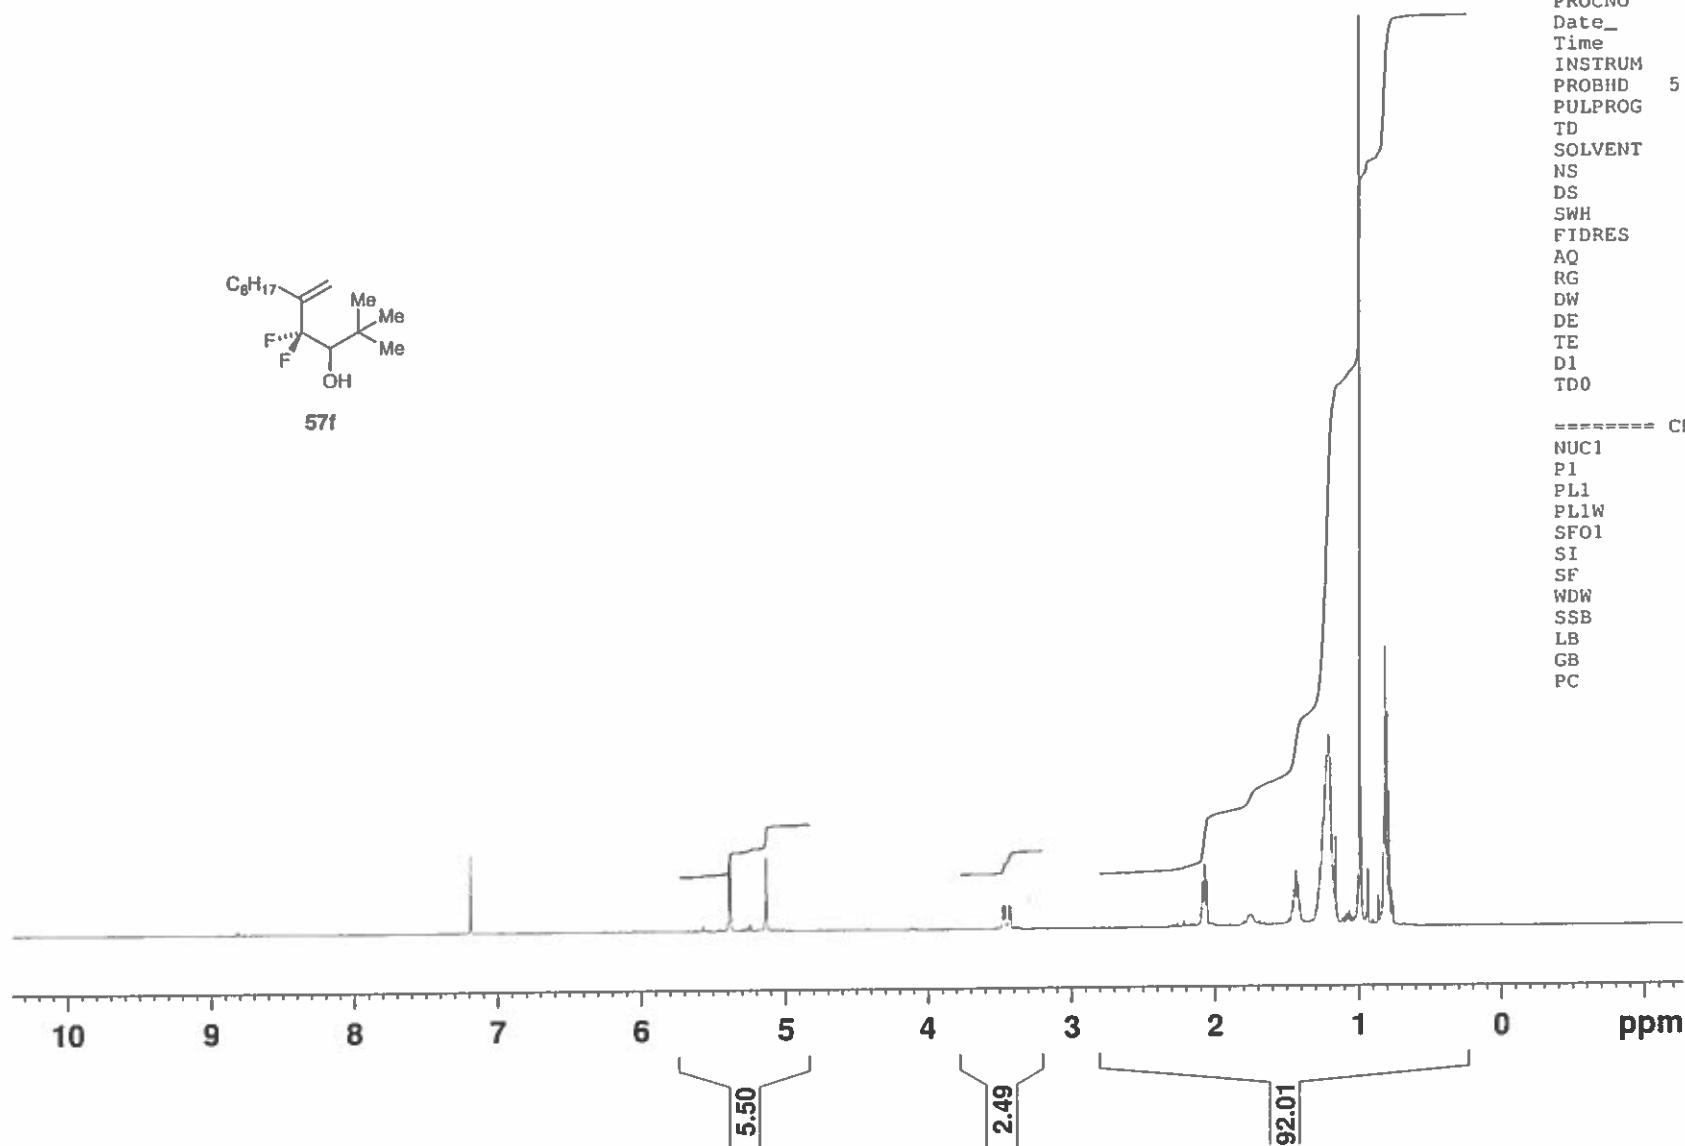

EJT-PRM123E Prod data 24mg  
mCARBON B CDCl3 {e:\bruk400\data\2014\jan\ejt\_32

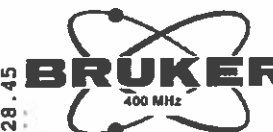

211.42

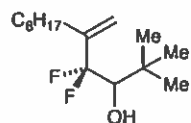

571

149.0  
144.0  
144.0  
144.0  
125.0  
123.0  
123.0  
120.0  
116.0  
114.0  
114.0  
114.0  
114.0  
114.0  
78.36  
78.06  
78.06  
77.79  
77.34  
77.23  
77.02  
76.71  
54.95  
45.16  
41.35  
36.08  
34.78  
34.44  
31.87  
31.70  
31.61  
31.01  
30.56  
30.54  
30.51  
29.99  
29.77  
29.46  
29.40  
29.31  
29.26  
29.17  
29.11  
29.07  
29.03  
28.45

Current Data Parameters  
NAME 2014-01-28-ejt-32  
EXPNO 22  
PROCNO 1

F2 - Acquisition Parameters  
Date\_ 20140129  
Time 19.09  
INSTRUM spect  
PROBHD 5 mm CPPBBO BB  
PULPROG zgpg30  
TD 65536  
SOLVENT CDCl3  
NS 1024  
DS 4  
SWH 24038.461 Hz  
FIDRES 0.366798 Hz  
AQ 1.3631488 sec  
RG 71.8  
DW 20.800 usec  
DE 41.77 usec  
TE 295.0 K  
D1 2.00000000 sec  
D11 0.03000000 sec  
TD0 1

===== CHANNEL f1 =====  
SF01 100.6077384 MHz  
NUC1 13C  
P1 10.00 usec  
PLW1 33.00000000 W

===== CHANNEL f2 =====  
SF02 400.0716003 MHz  
NUC2 1H  
CPDPRG12 waltz16  
PCPD2 80.00 usec  
PLW2 7.40000010 W  
PLW12 0.17209999 W  
PLW13 0.11014000 W

F2 - Processing parameters  
SI 32768  
SF 100.5976820 MHz  
WDW EM  
SSB 0  
LB 1.00 Hz  
GB 0  
PC 1.40

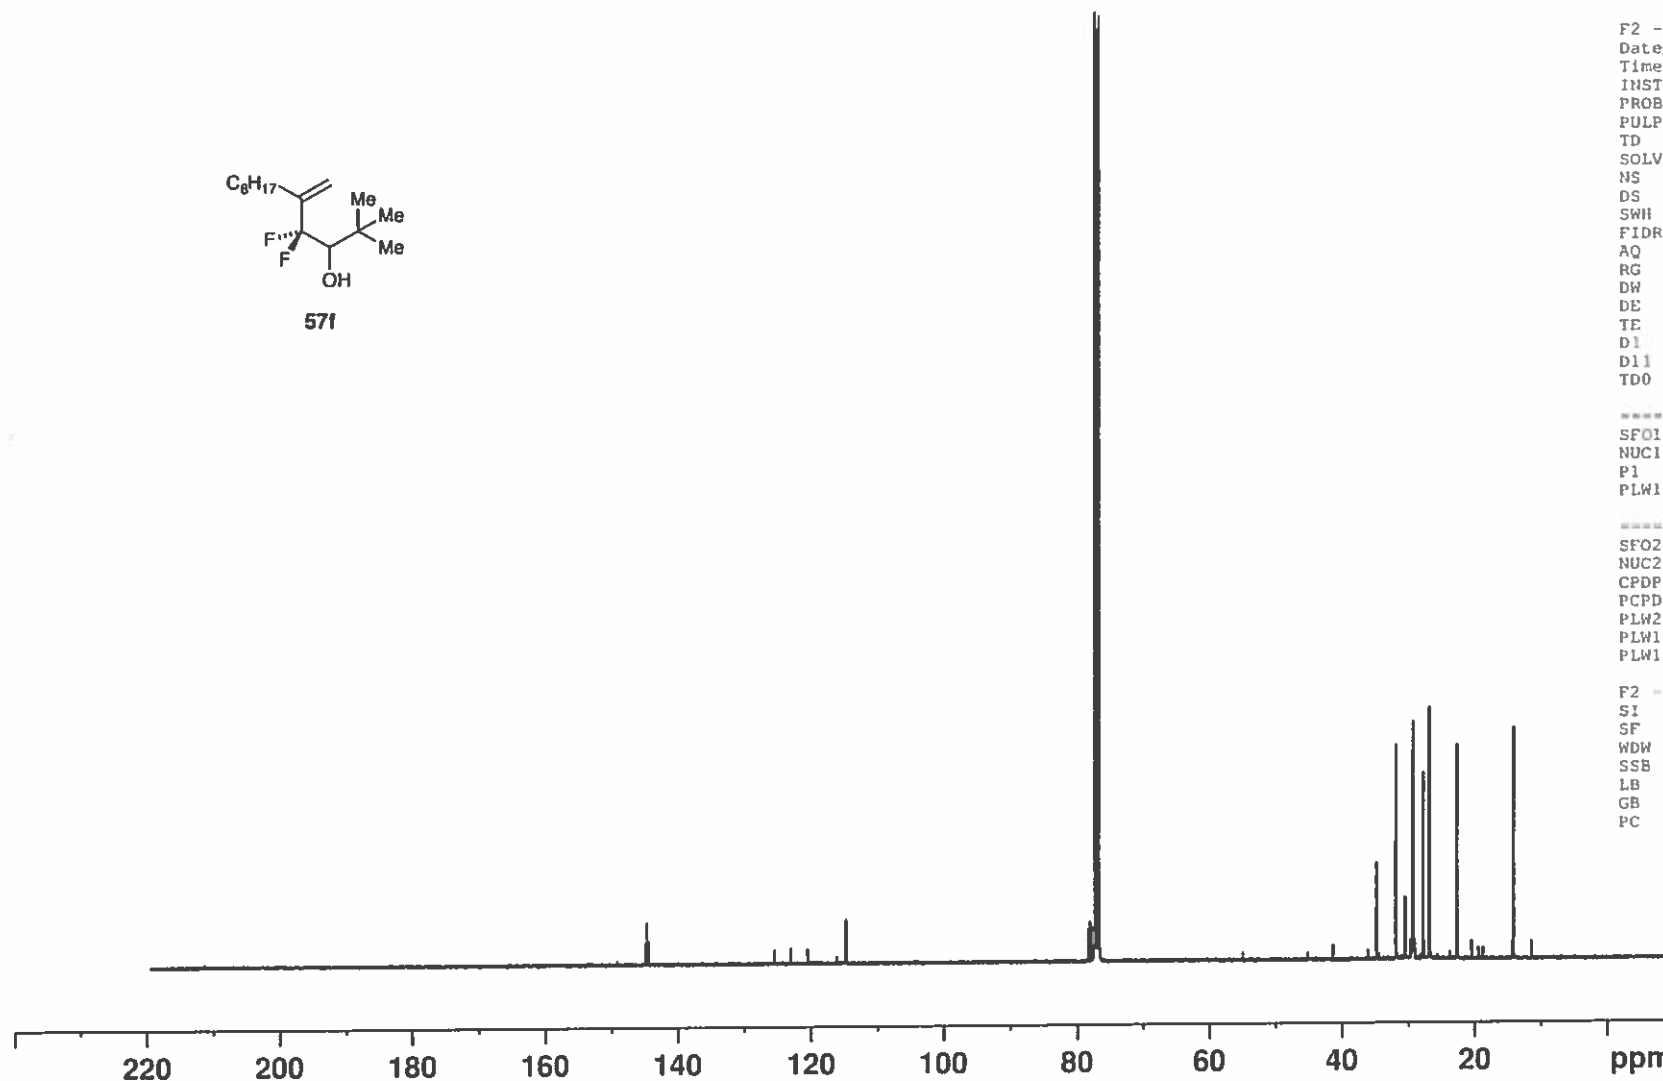

|                        |                                                                                                                            |                   |                                                                                  |                        |              |                      |             |
|------------------------|----------------------------------------------------------------------------------------------------------------------------|-------------------|----------------------------------------------------------------------------------|------------------------|--------------|----------------------|-------------|
| Acquisition Time (sec) | 0.5767                                                                                                                     | Comment           | EJT-PRM123E f8-15 24mg m19FCPD CDCl3 /opt/oldbruk500data.11vii11/2014/Jan ejt 29 |                        |              |                      |             |
| Date                   | 28 Jan 2014 16:19:12                                                                                                       | Date Stamp        | 28 Jan 2014 16:19:12                                                             |                        |              |                      |             |
| File Name              | \\ss7a.ds.man.ac.uk\vol5\VOL3\USERS\SNMRDATA\BRUK500DATA\BRUK500DATA\2014\JAN\DATA\EJT\NMR\2014-01-28-EJT-29\12\PDATA\111R |                   |                                                                                  |                        |              |                      |             |
| Frequency (MHz)        | 470.59                                                                                                                     | Nucleus           | 19F                                                                              | Number of Transients   | 16           | Origin               | spect       |
| Original Points Count  | 65536                                                                                                                      | Owner             | vnmr1                                                                            | Points Count           | 65536        | Pulse Sequence       | zgfhigqn    |
| Receiver Gain          | 32.00                                                                                                                      | SW(cyclical) (Hz) | 113636.37                                                                        | Solvent                | CHLOROFORM-d | Spectrum Offset (Hz) | -47059.0234 |
| Spectrum Type          | STANDARD                                                                                                                   | Sweep Width (Hz)  | 113634.63                                                                        | Temperature (degree C) | 27.000       |                      |             |

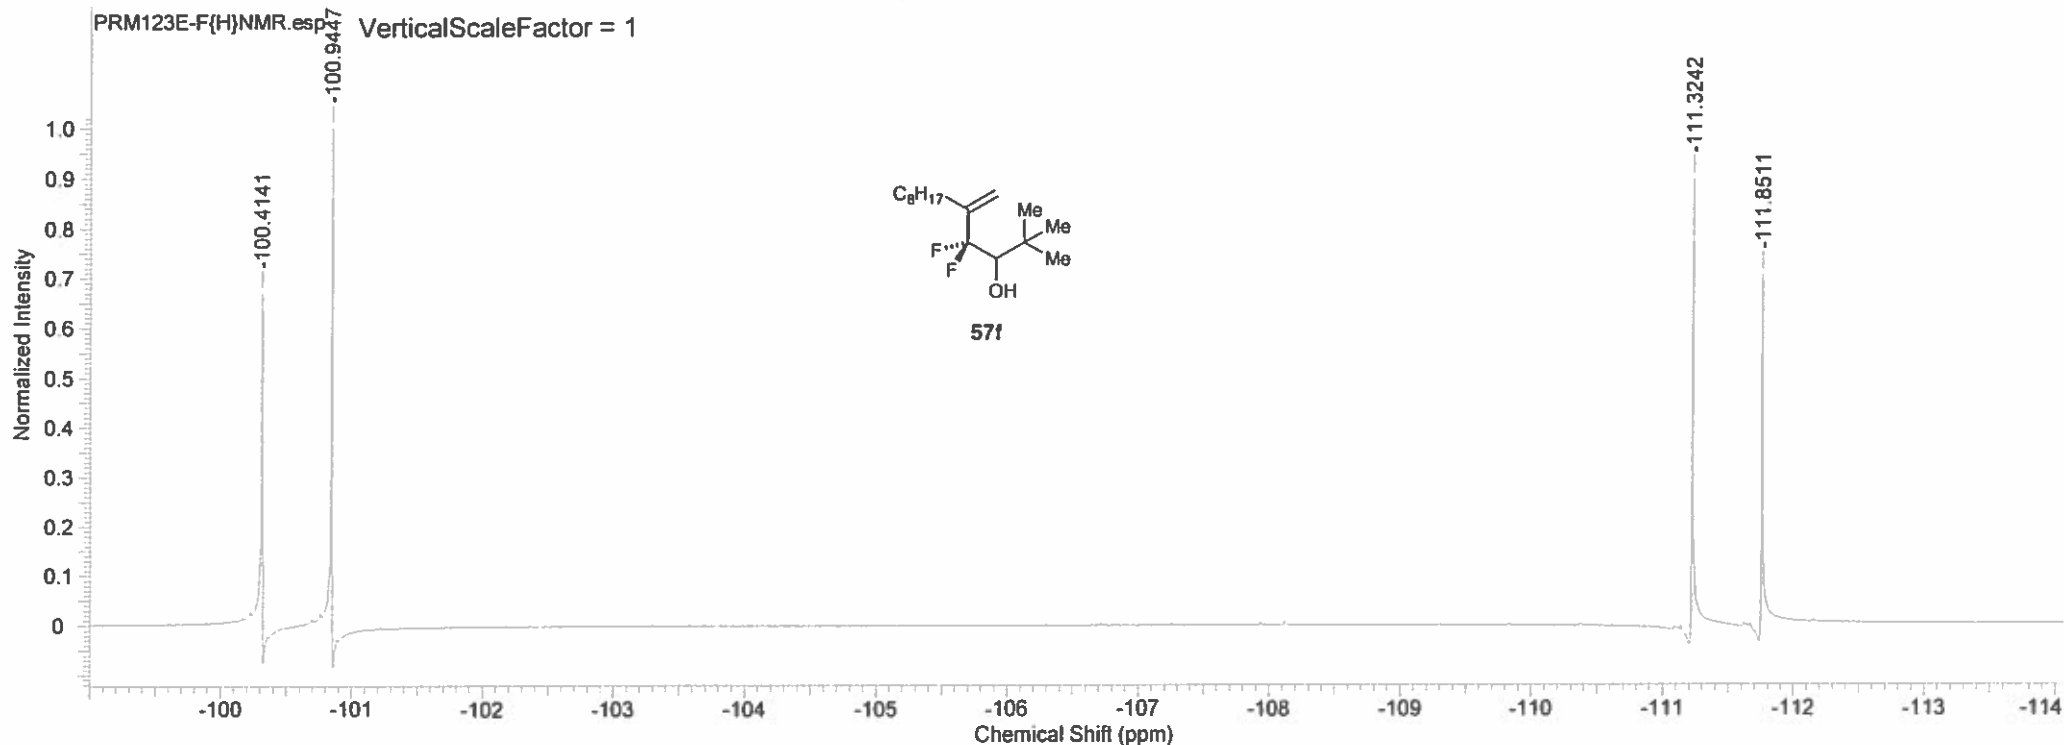

| No. | (ppm)   | (Hz)     | Height |
|-----|---------|----------|--------|
| 1   | -111.85 | -52636.3 | 0.7016 |
| 2   | -111.32 | -52388.3 | 0.8938 |
| 3   | -100.94 | -47503.8 | 1.0000 |
| 4   | -100.41 | -47254.1 | 0.6694 |



P. Mears  
EJT-PRM 120 prod F31-41  
0214-029  
mPROTON CDCl3 {E:\bruk500cdata\2014\Feb} staff 29

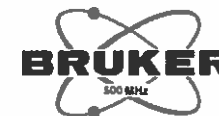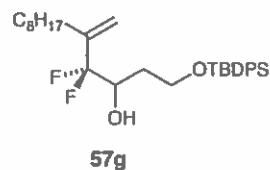

Current Data Parameters  
NAME 2014-02-18-staff-29  
EXPNO 10  
PROCNO 1

F2 - Acquisition Parameters  
Date\_ 20140218  
Time\_ 15.28  
INSTRUM spect  
PROBHD 5 mm CPPBBO BB  
PULPROG zg30  
TD 65536  
SOLVENT CDCl3  
NS 16  
DS 2  
SWH 10000.000 Hz  
FIDRES 0.152588 Hz  
AQ 3.2767999 sec  
RG 47.9  
DW 50.000 usec  
DE 13.87 usec  
TE 298.2 K  
D1 1.00000000 sec  
TD0 1

===== CHANNEL f1 =====  
SFO1 500.1930889 MHz  
NUC1 1H  
P1 13.00 usec  
PLW1 16.00000000 W

F2 - Processing parameters  
SI 65536  
SF 500.1900500 MHz  
WDW EM  
SSB 0  
LB 0.30 Hz  
GB 0  
PC 1.00

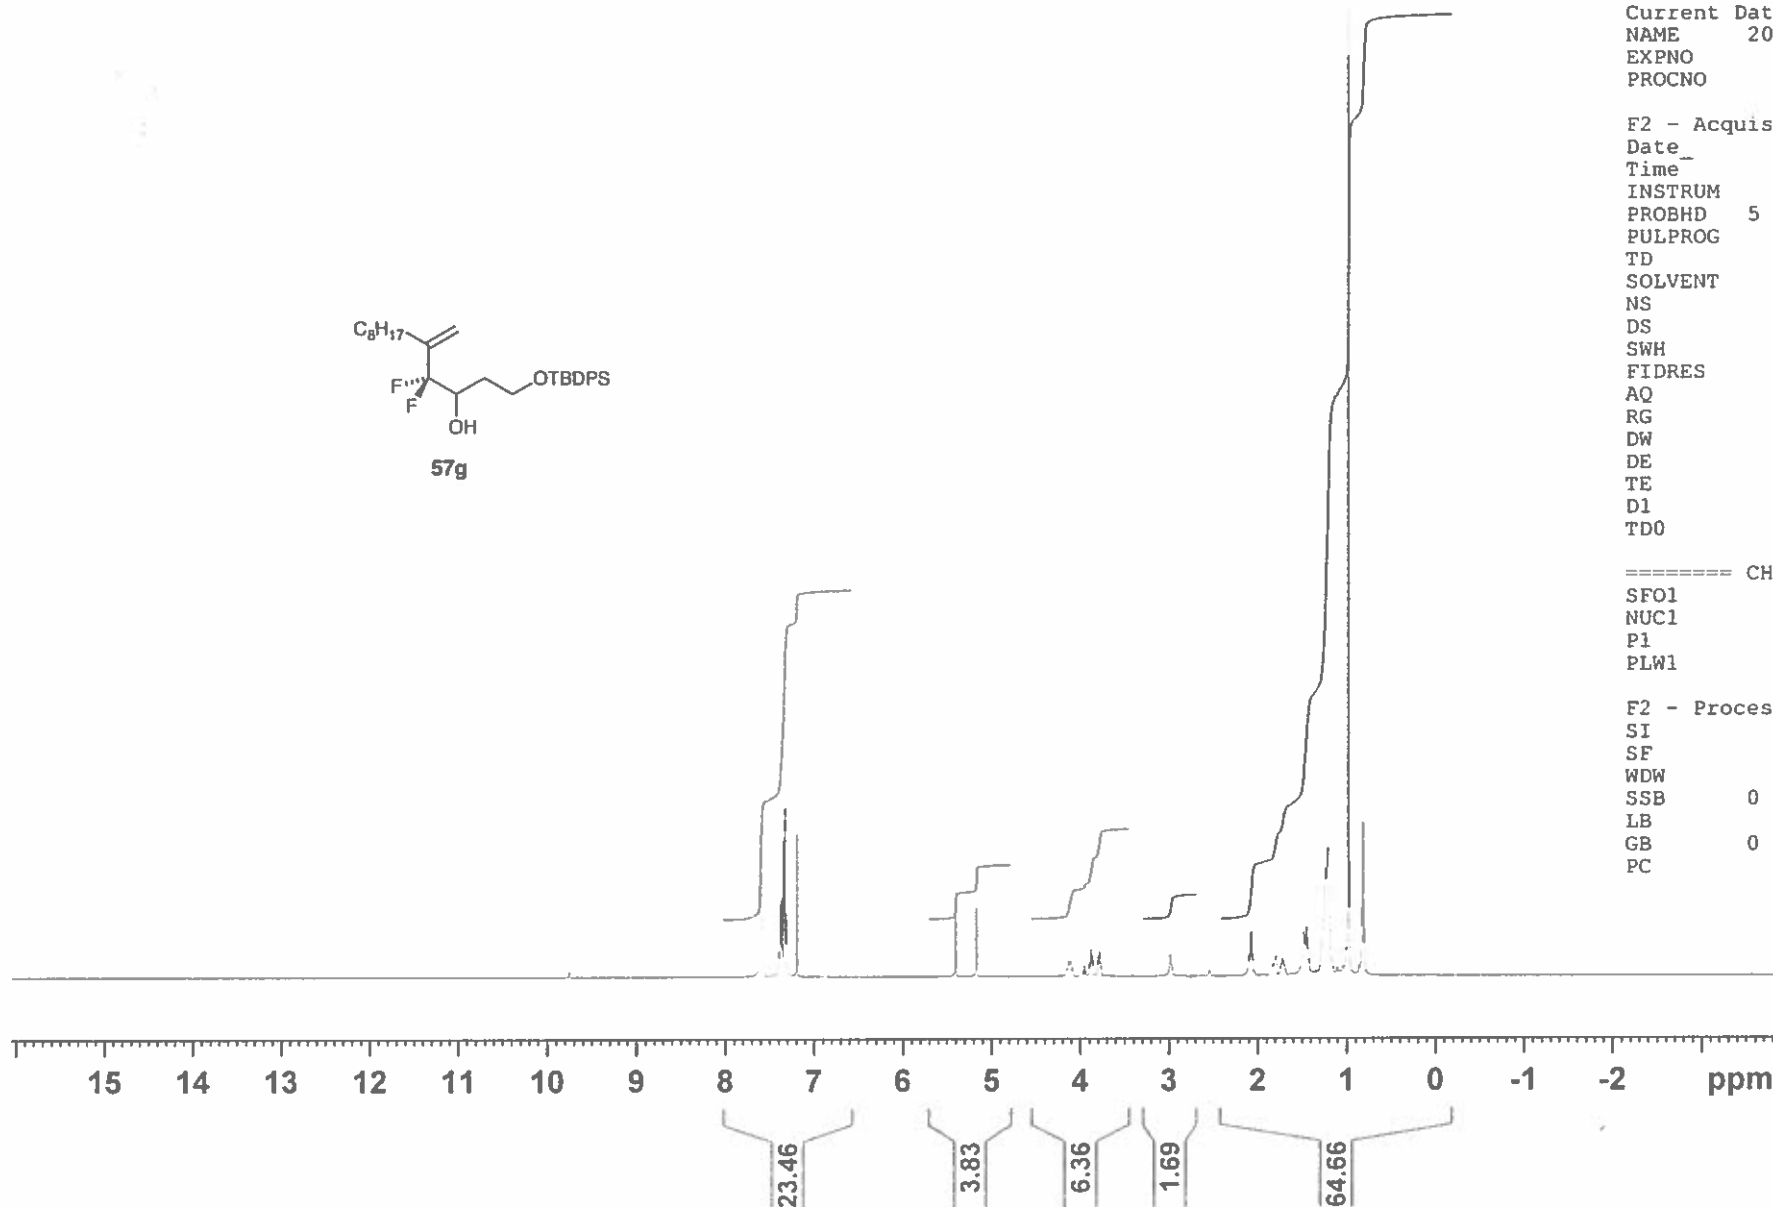

mCARBON CDC13 {E:\bruk500cdata\2014\Feb} staff 29

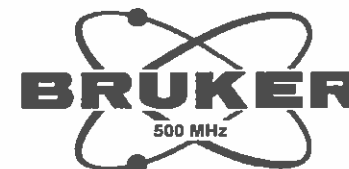

Current Data Parameters  
NAME 2014-02-18-staff-29  
EXPNO 11  
PROCNO 1

F2 - Acquisition Parameters  
Date\_ 20140218  
Time\_ 17.17  
INSTRUM spect  
PROBHD 5 mm CPPBBO BB  
PULPROG zgpg30  
TD 65536  
SOLVENT CDC13  
NS 2048  
DS 4  
SWH 29761.904 Hz  
FIDRES 0.454131 Hz  
AQ 1.1010048 sec  
RG 184.4  
DW 16.800 usec  
DE 102.82 usec  
TE 298.2 K  
D1 2.00000000 sec  
D11 0.03000000 sec  
TD0 1

===== CHANNEL f1 =====  
SFO1 125.7854504 MHz  
NUC1 13C  
P1 10.00 usec  
PLW1 53.59999847 W

===== CHANNEL f2 =====  
SFO2 500.1920008 MHz  
NUC2 1H  
CPDPRG12 waltz16  
PCPD2 80.00 usec  
PLW2 16.00000000 W  
PLW12 0.28622001 W  
PLW13 0.18318000 W

F2 - Processing parameters  
SI 32768  
SF 125.7728760 MHz  
WDW EM  
SSB 0  
LB 1.00 Hz  
GB 0  
PC 1.40

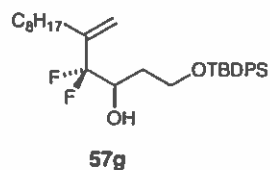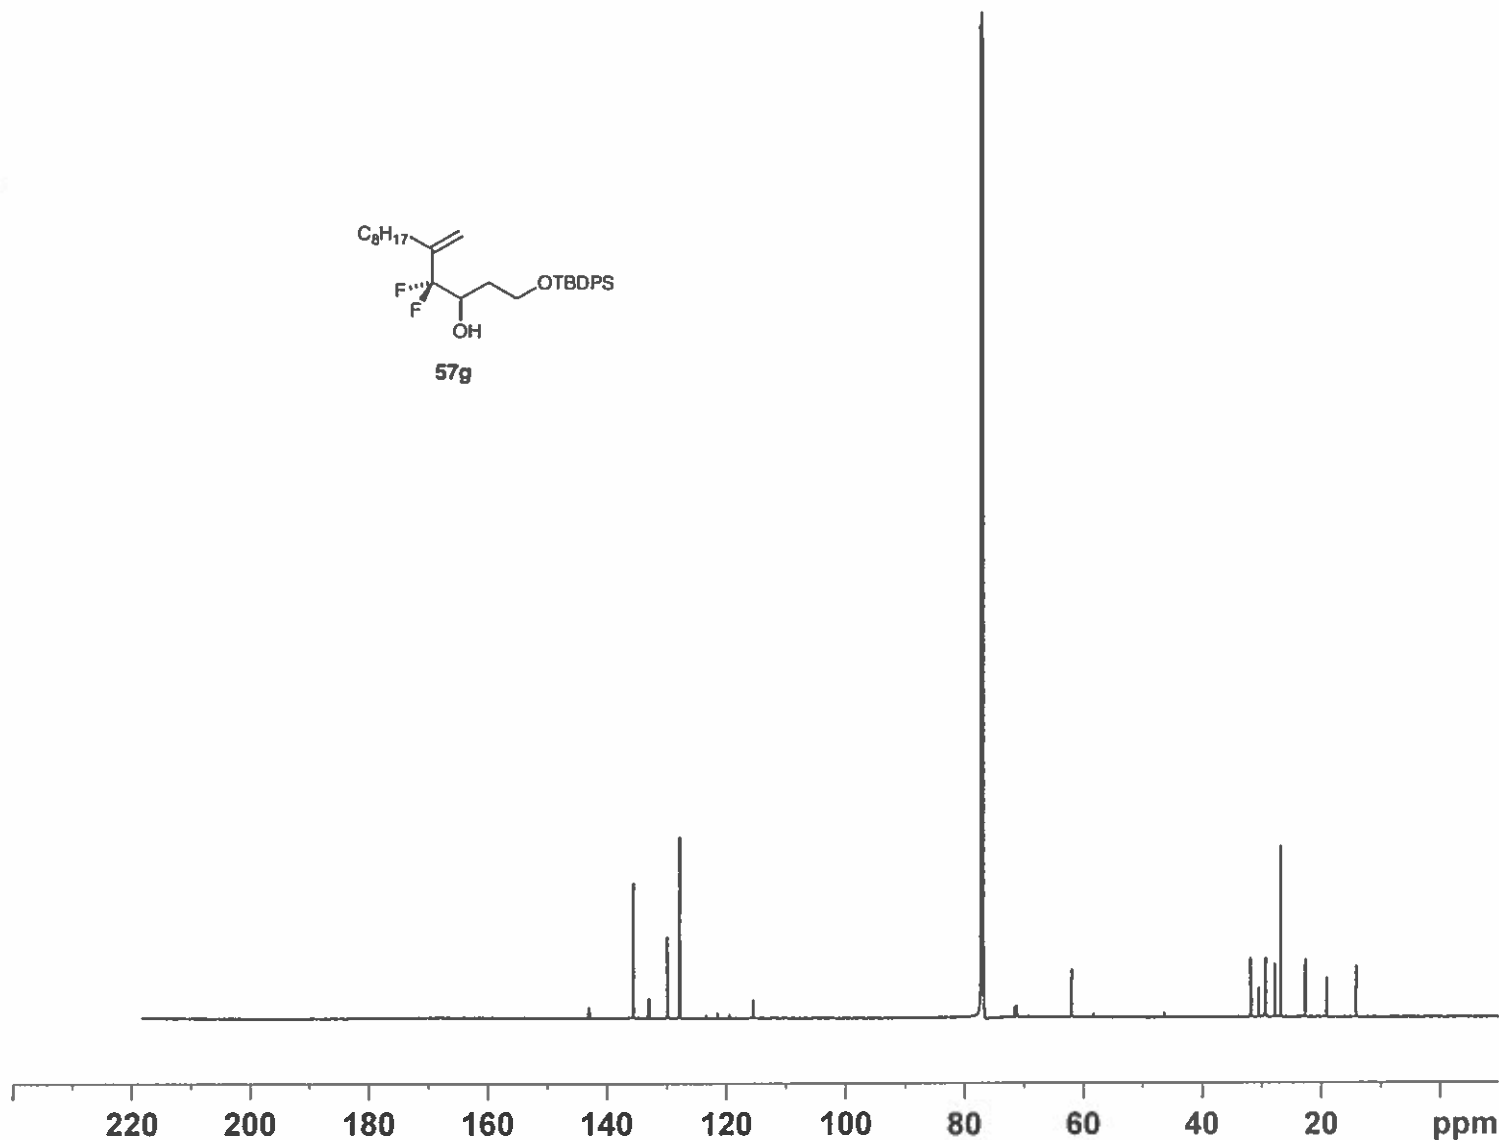

EJT-PRM120 f95-113 24mg  
mF19CPD CDCl3 {e:\bruk400data\2014\Feb} ejt 1

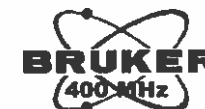

-109.91  
-110.56  
-113.92  
-114.47

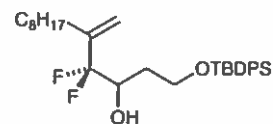

57g

NAME 2014-02-13-ejt-1  
EXPNO 11  
PROCNO 1  
Date\_ 20140213  
Time 13.50  
INSTRUM AV400  
PROBHD 5 mm PABBO BB-  
PULPROG zgig  
TD 131072  
SOLVENT CDCl3  
NS 16  
DS 4  
SWH 89285.711 Hz  
FIDRES 0.681196 Hz  
AQ 0.7340532 sec  
RG 4100  
DW 5.600 usec  
DE 7.51 usec  
TE 294.3 K  
D1 1.00000000 sec  
D11 0.03000000 sec  
TD0 1

===== CHANNEL f1 =====  
NUC1 19F  
P1 10.70 usec  
PL1 -5.00 dB  
PL1W 27.00716019 W  
SFO1 376.4607164 MHz

===== CHANNEL f2 =====  
CPDPRG2 waltz16  
NUC2 1H  
PCPD2 90.00 usec  
PL2 -3.60 dB  
PL12 12.14 dB  
PL2W 17.83863831 W  
PL12W 0.47573122 W  
SFO2 400.1316005 MHz  
S1 262144  
SF 376.4983660 MHz  
WDW EM  
SSB 0  
LB 0.30 Hz  
GB 0  
PC 2.00

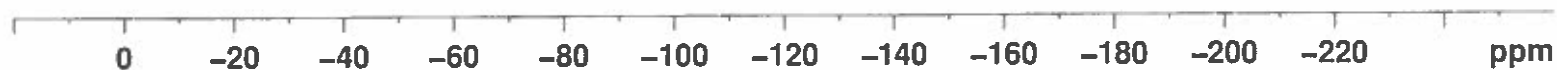

EJT-PRM145 f5-13 113mg  
mPROTON\_A\_night CDCl3 {e:\bruk400cdata\2014\Mar} ejt 11

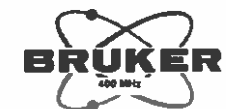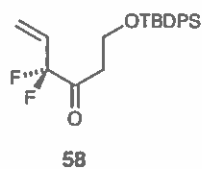

Current Data Parameters  
NAME 2014-03-28-ejt-11  
EXPNO 13  
PROCNO 1

F2 - Acquisition Parameters  
Date\_ 20140328  
Time 22.16  
INSTRUM spect  
PROBHD 5 mm CFPBBO BB  
PULPROG zg30  
TD 65536  
SOLVENT CDCl3  
NS 16  
DS 2  
SWH 8223.685 Hz  
FIDRES 0.125483 Hz  
AQ 3.9845889 sec  
RG 40.3  
DW 60.800 usec  
DE 10.00 usec  
TE 298.0 K  
D1 1.00000000 sec  
TD0 1

===== CHANNEL f1 =====  
SFO1 400.0718803 MHz  
NUC1 1H  
P1 12.00 usec  
PLW1 7.40000010 W

F2 - Processing parameters  
S1 32768  
SF 400.0700535 MHz  
WDW EM  
SSB 0  
LB 0.30 Hz  
GB 0  
PC 1.00

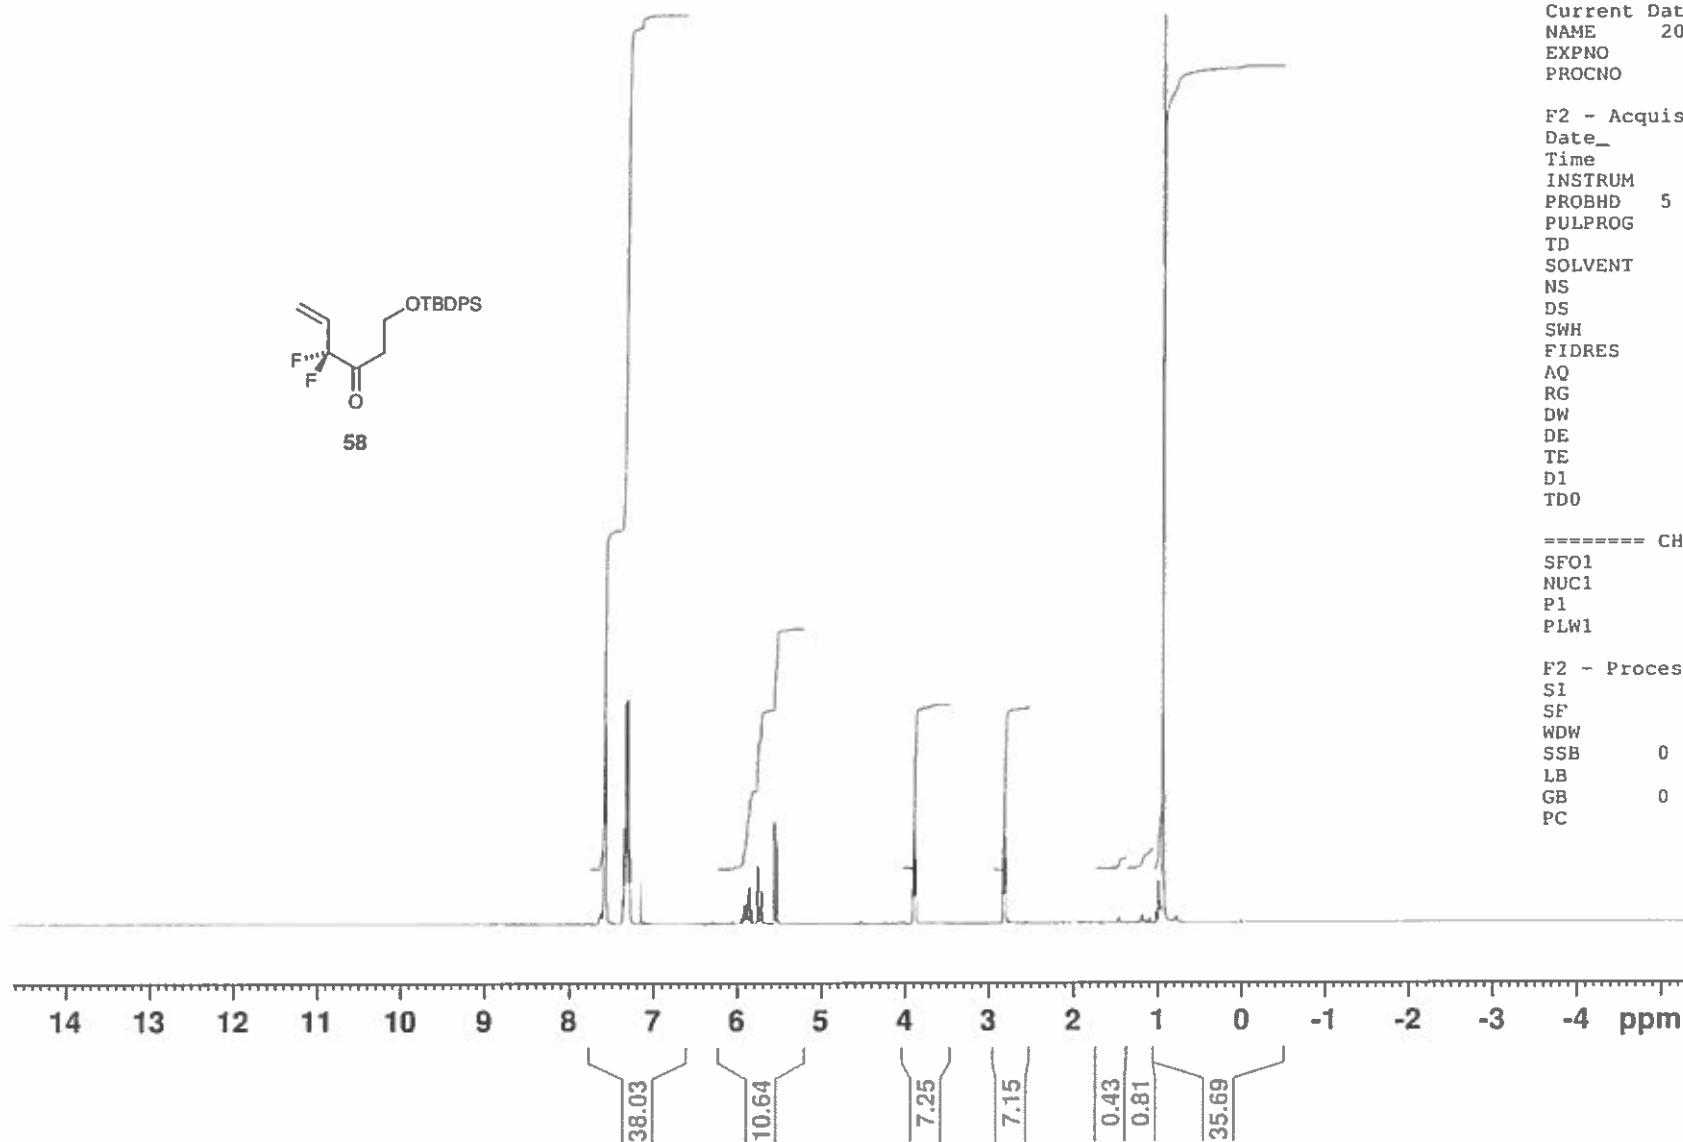

mCARBON BEDCIS (e:\bruk400\data\2013\Mar\pit 11

**58**

[illegible]

19.28 **BRUKER**  
400 MHz

```
Current Data Parameters
NAME      2014-03-28-ejt-11
EXPNO      12
PROCNO     1
```

```

F2 - Acquisition Parameters
Date_      20140328
Time       22.14
INSTRUM    spect
PROBHD     5 mm CYPBBO BB
PULPROG    zgpg30
TD         65536
SOLVENT    CDC13
NS         1024
DS         4
SWH        24038.461 Hz
FIDRES     0.366798 Hz
AQ         1.3631488 sec
RG         71.8
DW         20.800 usec
DE         41.77 usec
TE         298.0 K
D1         2.0000000 sec
D11        0.03000000 sec
TD0        1

```

```

===== CHANNEL f1 =====
SFO1      100.6077379 MHz
NUC1      13C
P1         10.00 usec
PLW1      33.00000000 W

```

```

===== CHANNEL f2 =====
SFO2          400.0716003 MHz
NUC2          1H
CPDRPG{2      waltz16
PCPD2          80.00 usec
PLW2          7.40000010 W
PLW12         0.17209999 W
PLW13         0.11014000 W

```

```

F2 - Processing parameters
SI              32768
SF              100.5976815 MHz
WDW              EM
SSB             0
LB              1.00 Hz
GB              0
PC              1.40

```

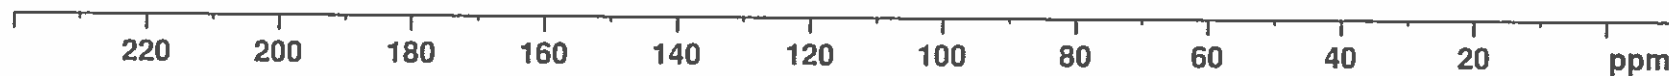

|                        |                                                                                                                           |                   |                                                                               |                        |              |                      |             |
|------------------------|---------------------------------------------------------------------------------------------------------------------------|-------------------|-------------------------------------------------------------------------------|------------------------|--------------|----------------------|-------------|
| Acquisition Time (sec) | 0.5767                                                                                                                    | Comment           | EJT-PRM145 f3-7 40mg m19FCPD CDCl3 /opt/oldbruk500data.11vii11/2014/Mar ejt 5 |                        |              |                      |             |
| Date                   | 26 Mar 2014 14:26:08                                                                                                      | Date Stamp        | 26 Mar 2014 14:26:08                                                          |                        |              |                      |             |
| File Name              | \\ss7a.ds.man.ac.uk\vol5\VOL3\USERS\SNMRDATA\BRUK500DATA\BRUK500DATA\2014\MAR\DATA\EJT\NMR\2014-03-26-EJT-5\12\PDATA\111R |                   |                                                                               |                        |              |                      |             |
| Frequency (MHz)        | 470.59                                                                                                                    | Nucleus           | 19F                                                                           | Number of Transients   | 16           | Origin               | spect       |
| Original Points Count  | 65536                                                                                                                     | Owner             | vnmr1                                                                         | Points Count           | 65536        | Pulse Sequence       | zgfhhgqn    |
| Receiver Gain          | 575.00                                                                                                                    | SW(cyclical) (Hz) | 113636.37                                                                     | Solvent                | CHLOROFORM-d | Spectrum Offset (Hz) | -47059.0234 |
| Spectrum Type          | STANDARD                                                                                                                  | Sweep Width (Hz)  | 113634.63                                                                     | Temperature (degree C) | 27.000       |                      |             |

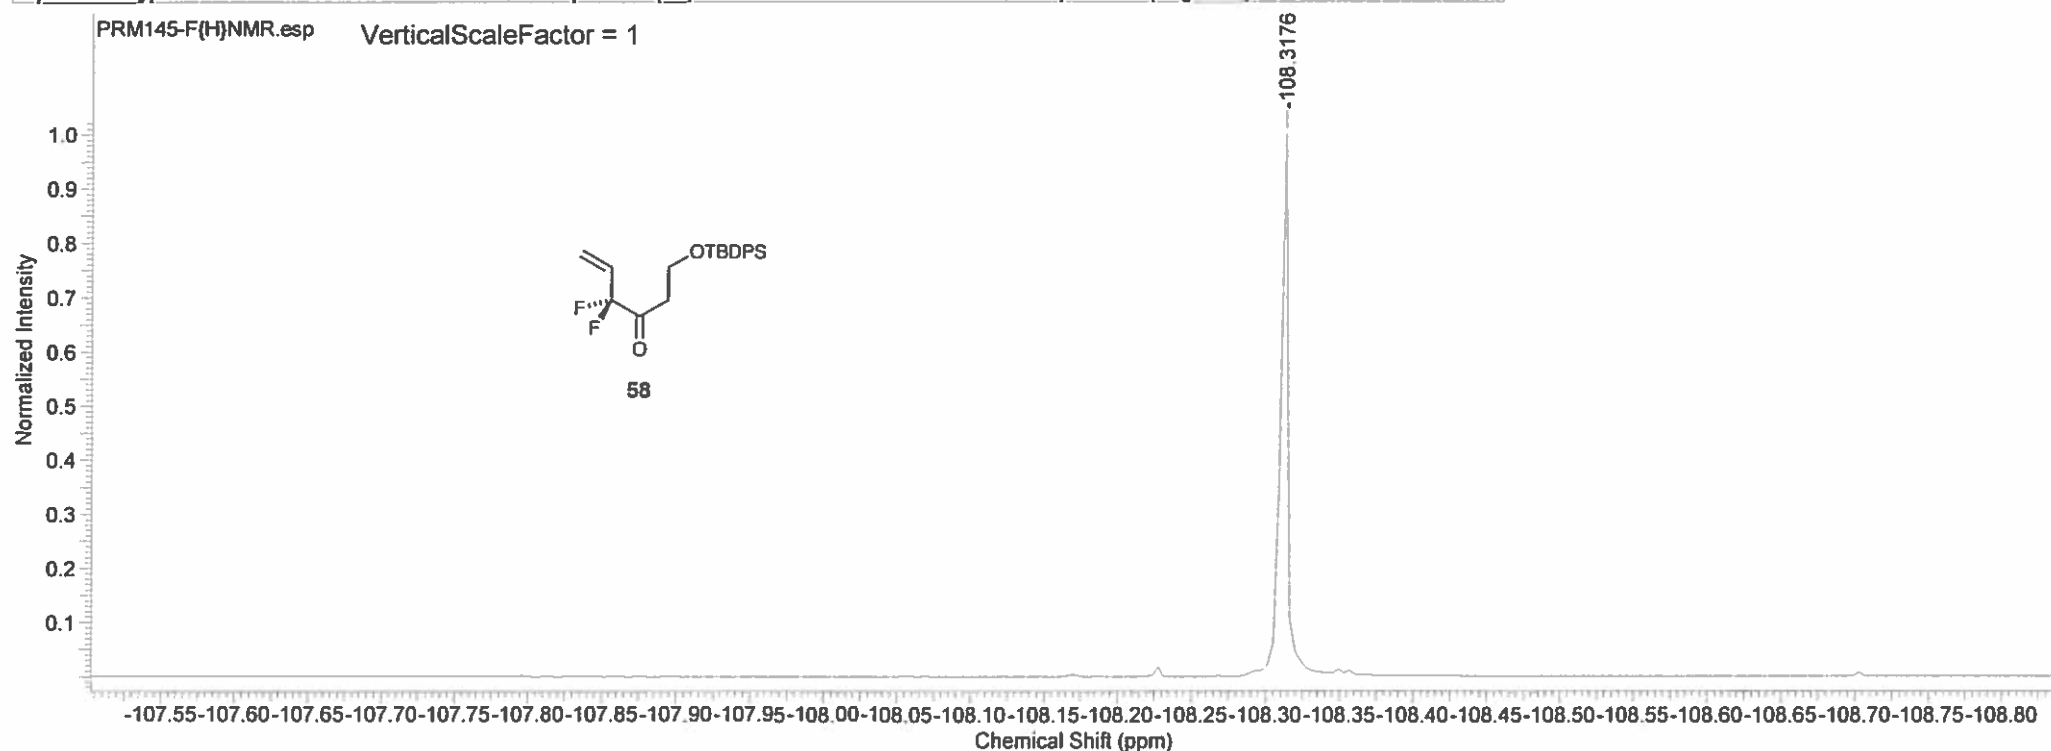

EJT-PRM146 phosphoranylidene f14-24 20mg  
mPROTON\_A CDCl3 {e:\bruk400cdata\2014\Apr} ejt 42

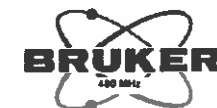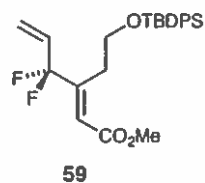

Current Data Parameters  
NAME 2014-04-01-ejt-42  
EXPNO 10  
PROCNO 1

F2 - Acquisition Parameters  
Date\_ 20140401  
Time 12.26  
INSTRUM spect  
PROBHD 5 mm CPPBBO BB  
PULPROG zg30  
TD 65536  
SOLVENT CDCl3  
NS 4  
DS 2  
SWH 8012.820 Hz  
FIDRES 0.122266 Hz  
AQ 4.0894465 sec  
RG 90.5  
DW 62.400 usec  
DE 10.00 usec  
TE 298.0 K  
D1 1.00000000 sec  
TD0 1

===== CHANNEL f1 =====  
SFO1 400.0719003 MHz  
NUC1 1H  
P1 12.00 usec  
PLW1 7.40000010 W

F2 - Processing parameters  
SI 65536  
SF 400.0700435 MHz  
WDW EM  
SSB 0  
LB 0.30 Hz  
GB 0  
PC 1.00

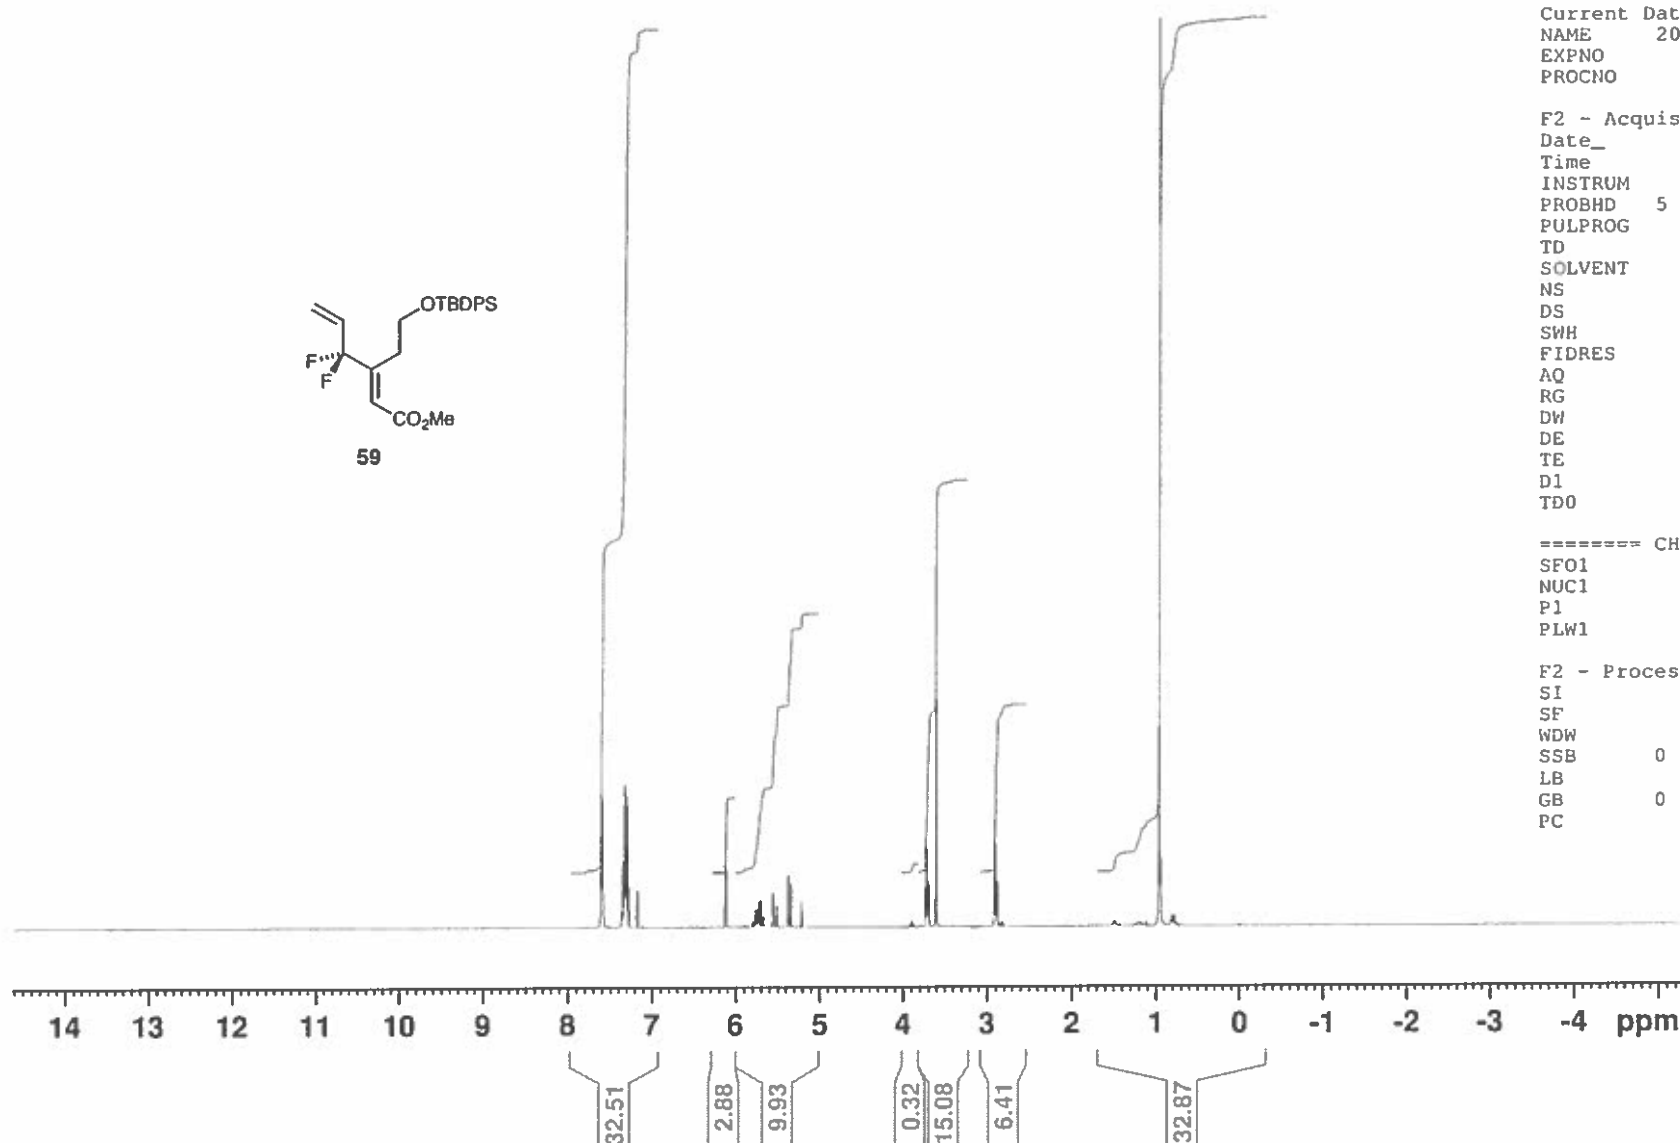

|                        |                                                                                                          |                        |                                                                          |                      |            |
|------------------------|----------------------------------------------------------------------------------------------------------|------------------------|--------------------------------------------------------------------------|----------------------|------------|
| Acquisition Time (sec) | 1.3631                                                                                                   | Comment                | EJT-PRM146 prod alkene mCARBON_B CDCl3 (e:\bruk400cdata\2014\Apr} ejt 24 |                      |            |
| Date                   | 03 Apr 2014 19:05:52                                                                                     | Date Stamp             | 03 Apr 2014 19:05:52                                                     |                      |            |
| File Name              | \\ss7a.ds.man.ac.uk\vol5\vol3\users\snmrdata\bruk400cdata\2014\Apr\data\ejt\nmr\2014-04-03-ejt-24\10\fid | Frequency (MHz)        | 100.60                                                                   |                      |            |
| Nucleus                | 13C                                                                                                      | Number of Transients   | 1024                                                                     | Origin               | spect      |
| Owner                  | nmrsu                                                                                                    | Points Count           | 32768                                                                    | Pulse Sequence       | zgpg30     |
| SW(cyclical) (Hz)      | 24038.46                                                                                                 | Solvent                | CHLOROFORM-d                                                             | Spectrum Offset (Hz) | 10052.8125 |
| Sweep Width (Hz)       | 24037.73                                                                                                 | Temperature (degree C) | 25.000                                                                   | Spectrum Type        | STANDARD   |

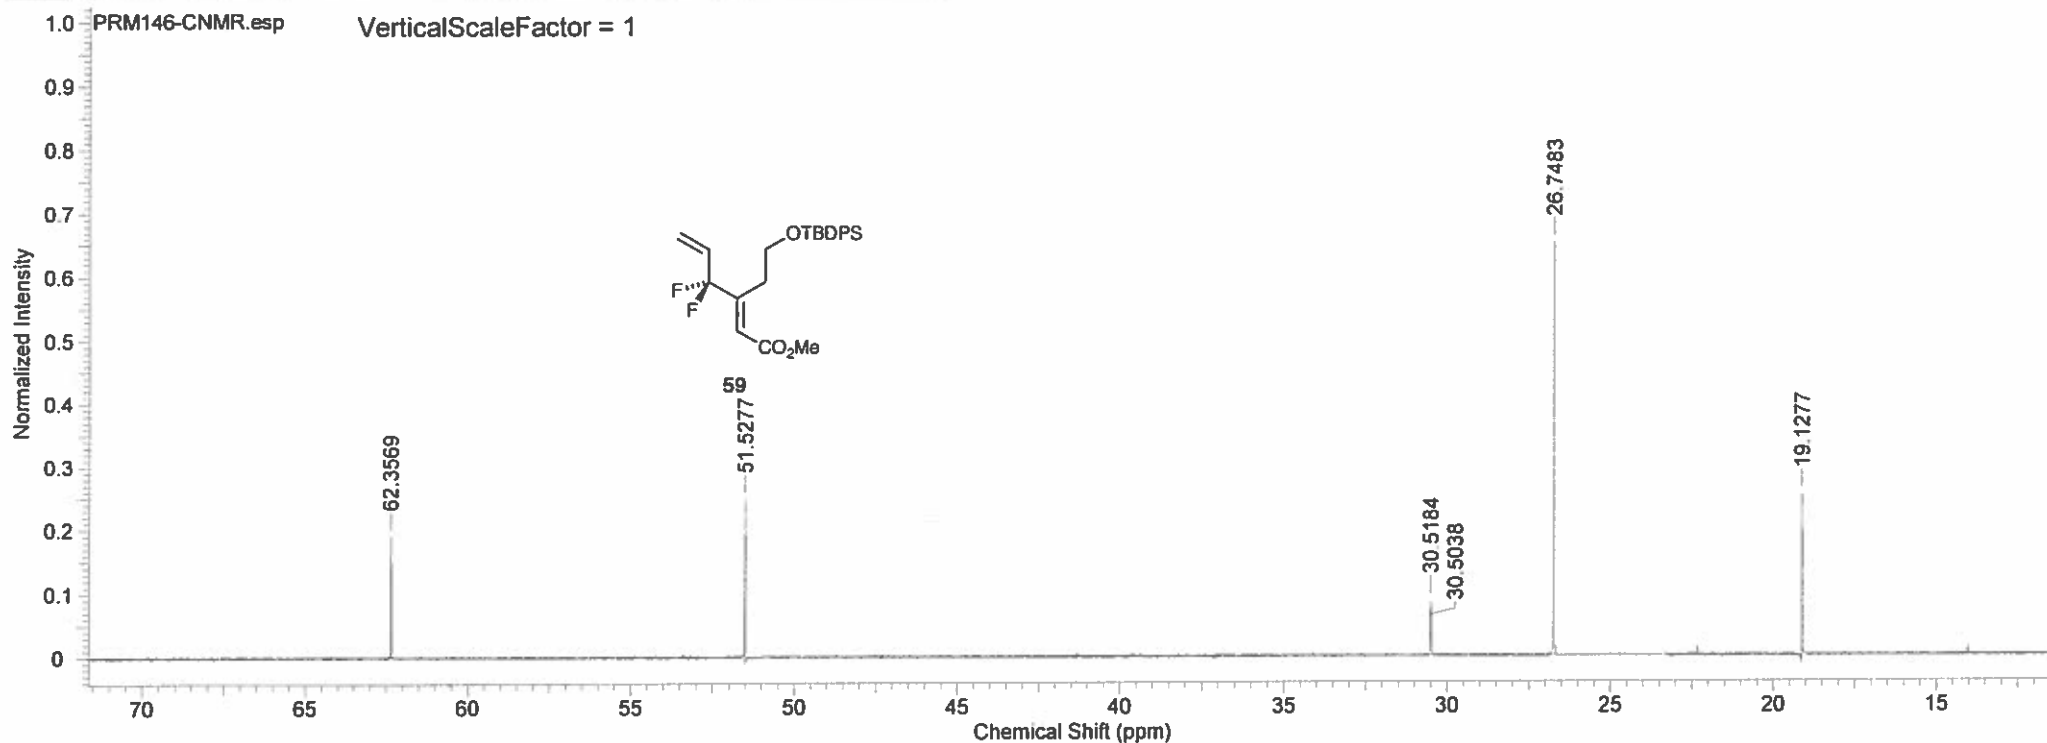

| No. | (ppm) | (Hz)   | Height |
|-----|-------|--------|--------|
| 1   | 19.13 | 1924.2 | 0.2521 |
| 2   | 26.75 | 2690.8 | 0.6509 |
| 3   | 30.50 | 3068.6 | 0.0458 |
| 4   | 30.52 | 3070.1 | 0.0862 |
| 5   | 30.53 | 3071.5 | 0.0407 |
| 6   | 51.53 | 5183.6 | 0.2488 |
| 7   | 62.36 | 6273.0 | 0.1910 |



|                        |                                                                                                          |                        |                                                                          |                      |            |                       |          |
|------------------------|----------------------------------------------------------------------------------------------------------|------------------------|--------------------------------------------------------------------------|----------------------|------------|-----------------------|----------|
| Acquisition Time (sec) | 1.3631                                                                                                   | Comment                | EJT-PRM146 prod alkene mCARBON_B CDCl3 (e:\bruk400cdata\2014\Apr) ejt 24 |                      |            |                       |          |
| Date                   | 03 Apr 2014 19:05:52                                                                                     | Date Stamp             | 03 Apr 2014 19:05:52                                                     |                      |            |                       |          |
| File Name              | \\ss7a.ds.man.ac.uk\vol5\vol3\users\snmrdata\bruk400cdata\2014\Apr\data\ejt\nmr\2014-04-03-ejt-24\10\fid |                        |                                                                          | Frequency (MHz)      | 100.60     |                       |          |
| Nucleus                | 13C                                                                                                      | Number of Transients   | 1024                                                                     | Origin               | spect      | Original Points Count | 32768    |
| Owner                  | nmrsu                                                                                                    | Points Count           | 32768                                                                    | Pulse Sequence       | zgpg30     | Receiver Gain         | 45.20    |
| SW(cyclical) (Hz)      | 24038.46                                                                                                 | Solvent                | CHLOROFORM-d                                                             | Spectrum Offset (Hz) | 10052.8125 | Spectrum Type         | STANDARD |
| Sweep Width (Hz)       | 24037.73                                                                                                 | Temperature (degree C) | 25.000                                                                   |                      |            |                       |          |

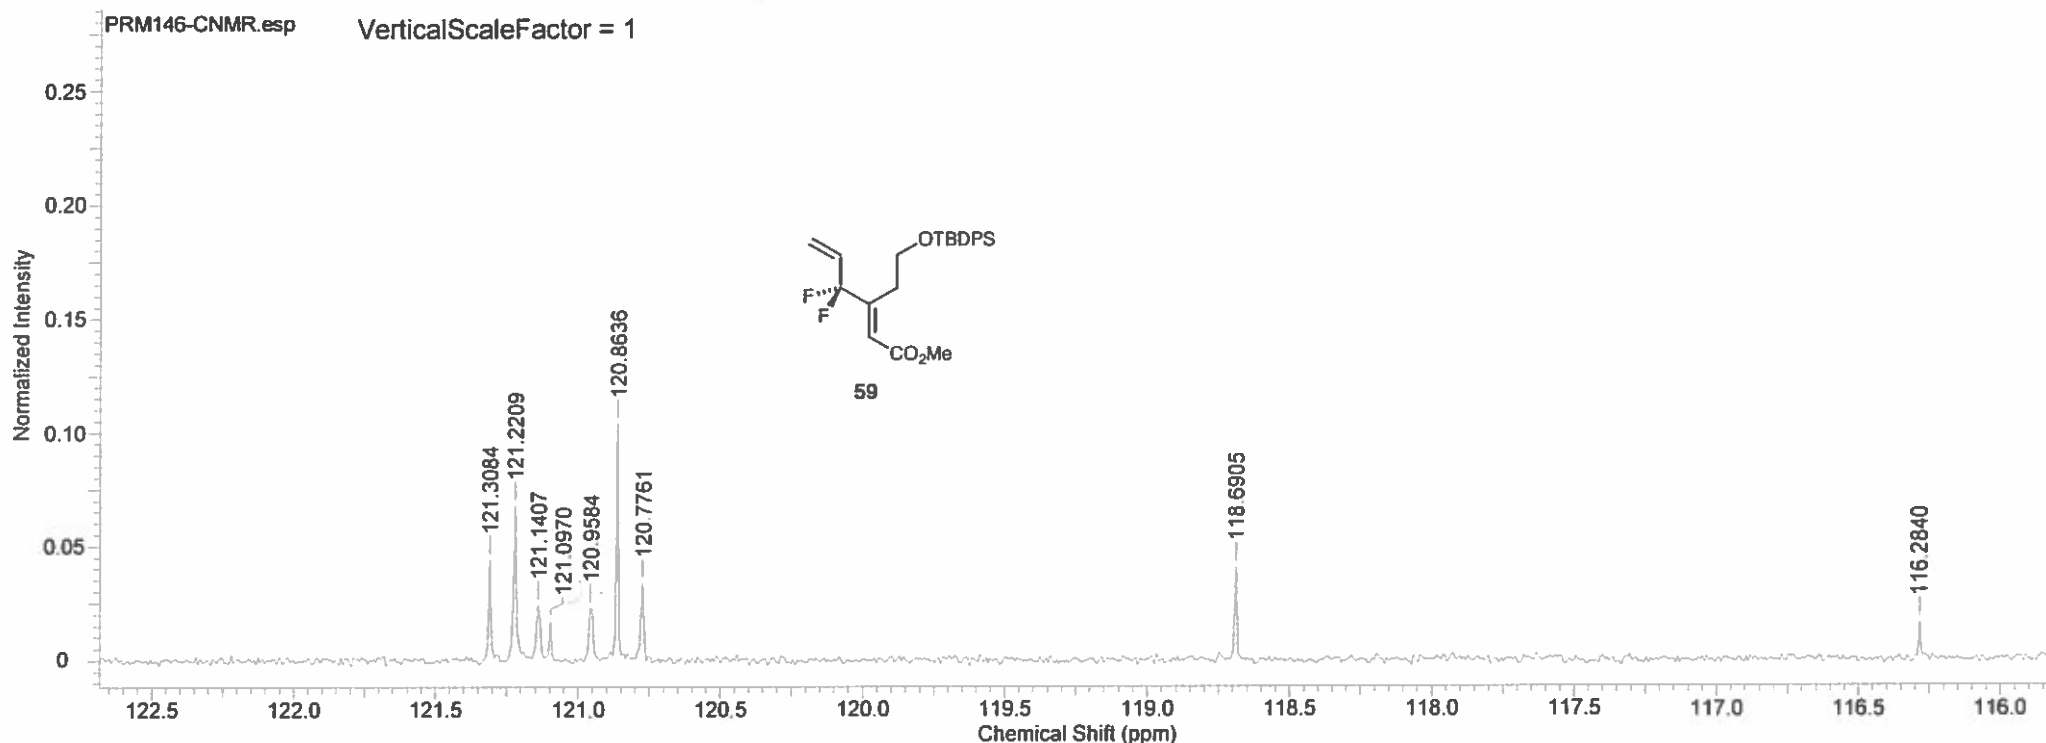

| No. | (ppm) | (Hz)   | Height | No. | (ppm)  | (Hz)    | Height | No. | (ppm)  | (Hz)    | Height | No. | (ppm)  | (Hz)    | Height |
|-----|-------|--------|--------|-----|--------|---------|--------|-----|--------|---------|--------|-----|--------|---------|--------|
| 1   | 19.13 | 1924.2 | 0.2521 | 5   | 30.53  | 3071.5  | 0.0407 | 9   | 118.69 | 11940.0 | 0.0403 | 13  | 121.10 | 12182.1 | 0.0171 |
| 2   | 26.75 | 2690.8 | 0.6509 | 6   | 51.53  | 5183.6  | 0.2488 | 10  | 120.78 | 12149.8 | 0.0338 | 14  | 121.14 | 12186.5 | 0.0241 |
| 3   | 30.50 | 3068.6 | 0.0458 | 7   | 62.36  | 6273.0  | 0.1910 | 11  | 120.86 | 12158.6 | 0.1039 | 15  | 121.22 | 12194.5 | 0.0676 |
| 4   | 30.52 | 3070.1 | 0.0862 | 8   | 116.28 | 11697.9 | 0.0158 | 12  | 120.96 | 12168.1 | 0.0228 | 16  | 121.31 | 12203.3 | 0.0440 |

| No. | (ppm) | (Hz)   | Height | No. | (ppm)  | (Hz)    | Height | No. | (ppm)  | (Hz)    | Height | No. | (ppm)  | (Hz)    | Height | No. | (ppm)  | (Hz)    | Height |
|-----|-------|--------|--------|-----|--------|---------|--------|-----|--------|---------|--------|-----|--------|---------|--------|-----|--------|---------|--------|
| 1   | 19.13 | 1924.2 | 0.2521 | 6   | 51.53  | 5183.6  | 0.2488 | 11  | 120.86 | 12158.6 | 0.1039 | 16  | 121.31 | 12203.3 | 0.0440 | 21  | 131.65 | 13243.6 | 0.0470 |
| 2   | 26.75 | 2690.8 | 0.6509 | 7   | 62.36  | 6273.0  | 0.1910 | 12  | 120.96 | 12168.1 | 0.0228 | 17  | 127.59 | 12835.0 | 1.0000 | 22  | 133.68 | 13447.5 | 0.1445 |
| 3   | 30.50 | 3068.6 | 0.0458 | 8   | 116.28 | 11697.9 | 0.0158 | 13  | 121.10 | 12182.1 | 0.0171 | 18  | 129.55 | 13032.3 | 0.2574 | 23  | 135.59 | 13639.7 | 0.7165 |
| 4   | 30.52 | 3070.1 | 0.0862 | 9   | 118.69 | 11940.0 | 0.0403 | 14  | 121.14 | 12186.5 | 0.0241 | 19  | 131.08 | 13186.4 | 0.0393 |     |        |         |        |
| 5   | 30.53 | 3071.5 | 0.0407 | 10  | 120.78 | 12149.8 | 0.0338 | 15  | 121.22 | 12194.5 | 0.0676 | 20  | 131.36 | 13215.0 | 0.0929 |     |        |         |        |



|                        |                                                                                                        |                        |                                                                                            |                      |             |
|------------------------|--------------------------------------------------------------------------------------------------------|------------------------|--------------------------------------------------------------------------------------------|----------------------|-------------|
| Acquisition Time (sec) | 0.7340                                                                                                 | Comment                | EJT-PRM146 phosphoranylidene f14-24 20mg mF19_cryo CDCl3 (e:\bruk400cdata\2014\Apr)\ejt 42 |                      |             |
| Date                   | 01 Apr 2014 12:29:04                                                                                   | Date Stamp             | 01 Apr 2014 12:29:04                                                                       |                      |             |
| File Name              | \ss7a.ds.man.ac.uk\vol5\vol3\users\snmrdata\bruk400cdata\2014\Apr\data\ejt\nmr\2014-04-01-ejt-42\1\fid |                        |                                                                                            | Frequency (MHz)      | 376.44      |
| Nucleus                | 19F                                                                                                    | Number of Transients   | 4                                                                                          | Origin               | spect       |
| Owner                  | nmrsu                                                                                                  | Points Count           | 65536                                                                                      | Pulse Sequence       | zg          |
| SW(cyclical) (Hz)      | 89285.71                                                                                               | Solvent                | CHLOROFORM-d                                                                               | Spectrum Offset (Hz) | -37644.8594 |
| Sweep Width (Hz)       | 89284.35                                                                                               | Temperature (degree C) | 25.000                                                                                     | Spectrum Type        | STANDARD    |

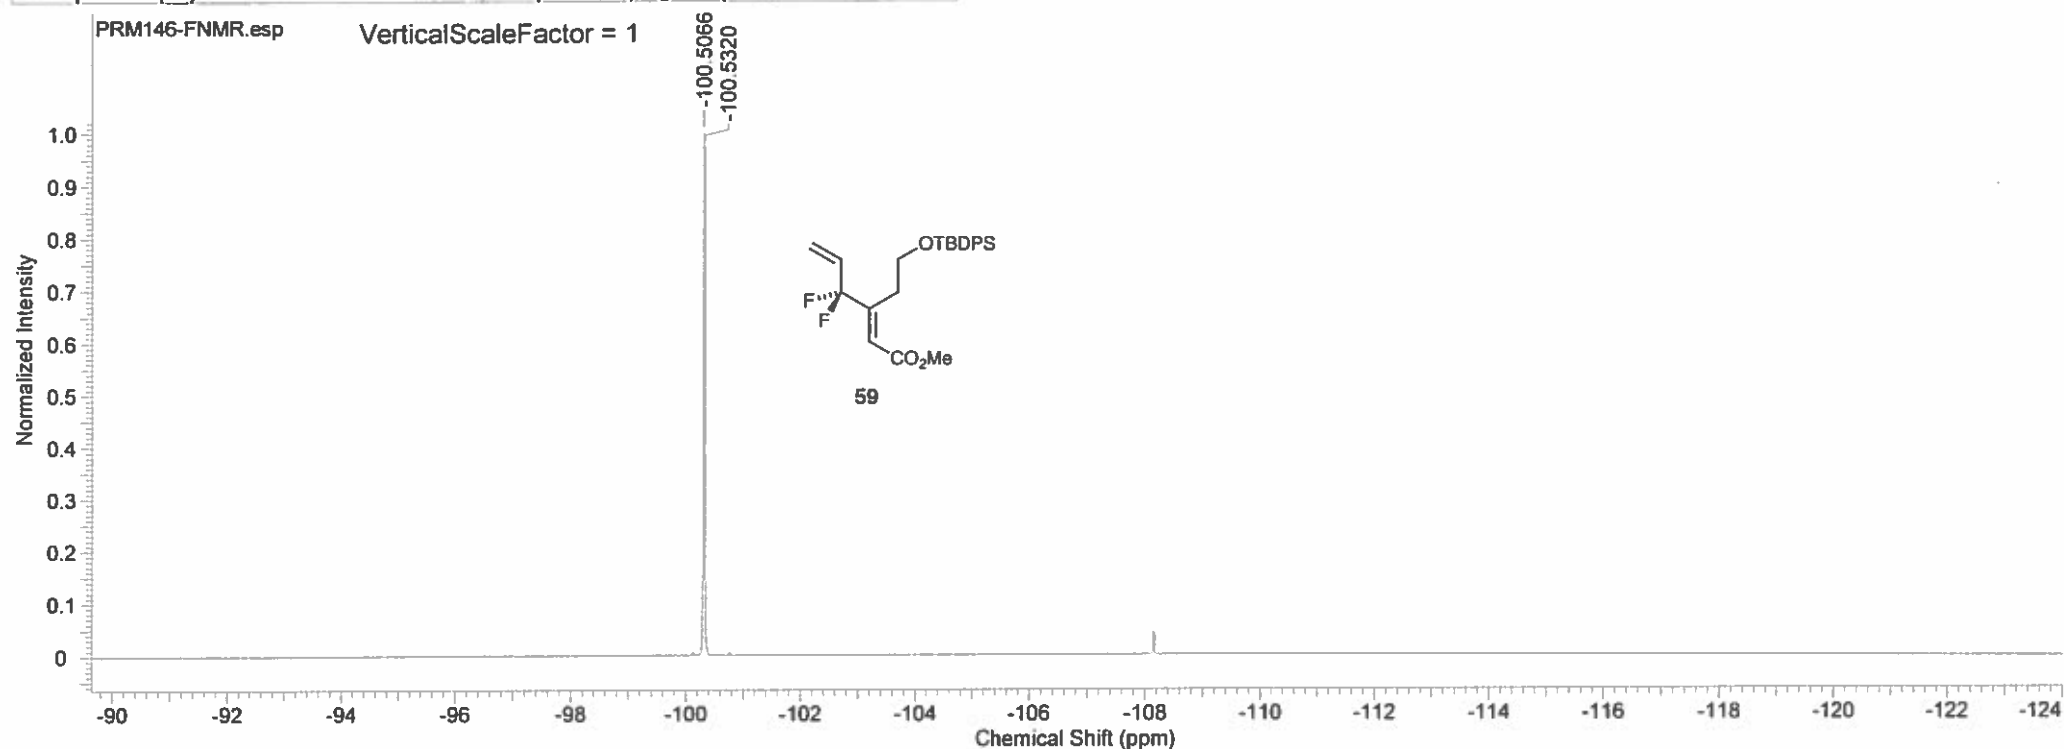

| No. | (ppm)   | (Hz)     | Height |
|-----|---------|----------|--------|
| 1   | -100.53 | -37844.4 | 0.9733 |
| 2   | -100.51 | -37834.9 | 1.0000 |

EJT-PRM146 isomer data  
mPROTON\_A\_night CDCl3 {e:\bruk400cdata\2014\Apr} ejt 18

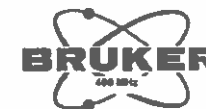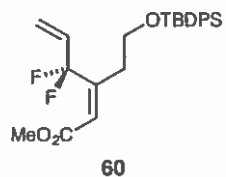

Current Data Parameters  
NAME 2014-04-29-ejt-18  
EXPNO 11  
PROCNO 1

F2 - Acquisition Parameters  
Date\_ 20140430  
Time 3.52  
INSTRUM spect  
PROBHD 5 mm CPPBBO BB  
PULPROG zg30  
TD 65536  
SOLVENT CDCl3  
NS 16  
DS 2  
SWH 8223.685 Hz  
FIDRES 0.125483 Hz  
AQ 3.9845889 sec  
RG 114  
DW 60.800 usec  
DE 10.00 usec  
TE 298.0 K  
D1 1.00000000 sec  
TD0 1

===== CHANNEL f1 =====  
SF01 400.0718803 MHz  
NUC1 1H  
P1 12.00 usec  
PLW1 7.40000010 W

F2 - Processing parameters  
SI 32768  
SF 400.0700399 MHz  
WDW EM  
SSB 0  
LB 0.30 Hz  
GB 0  
PC 1.00

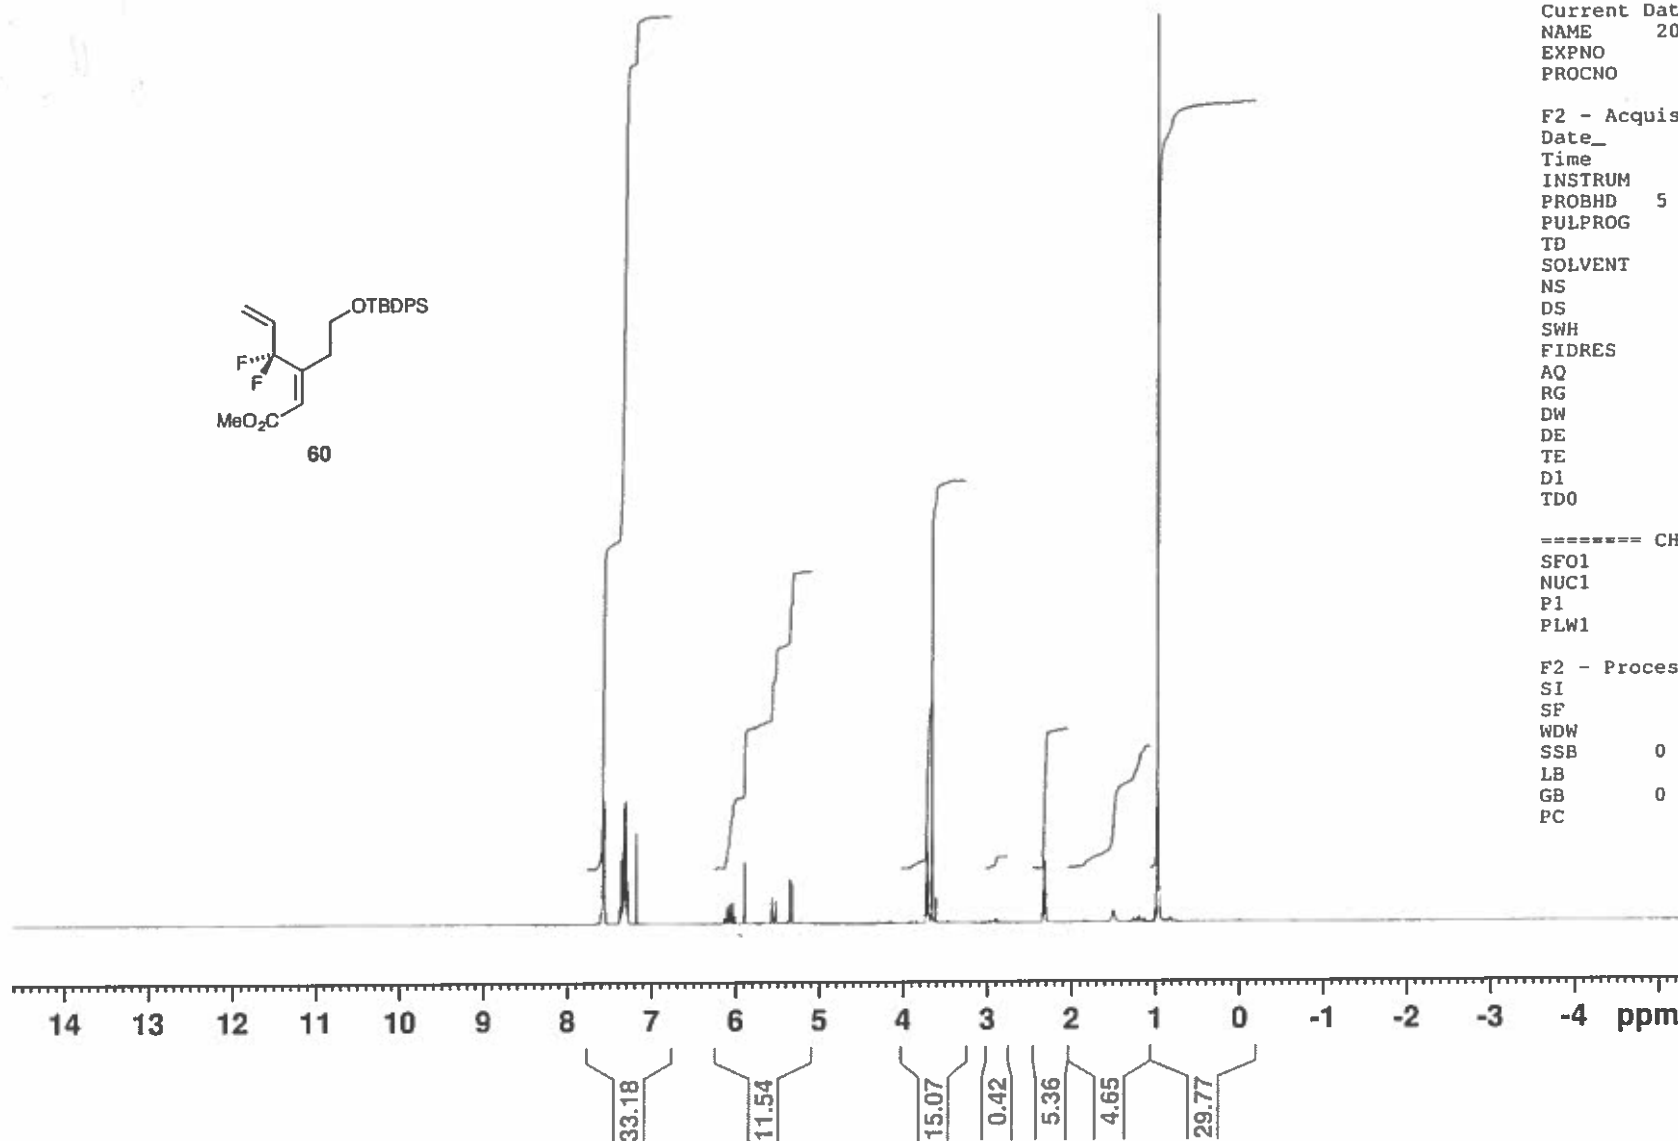

## EJT-PRM146 isomer data

mCARBON\_B CDCl3 (a Bruker 400c data 2014 Apr) ejt-18

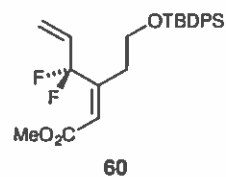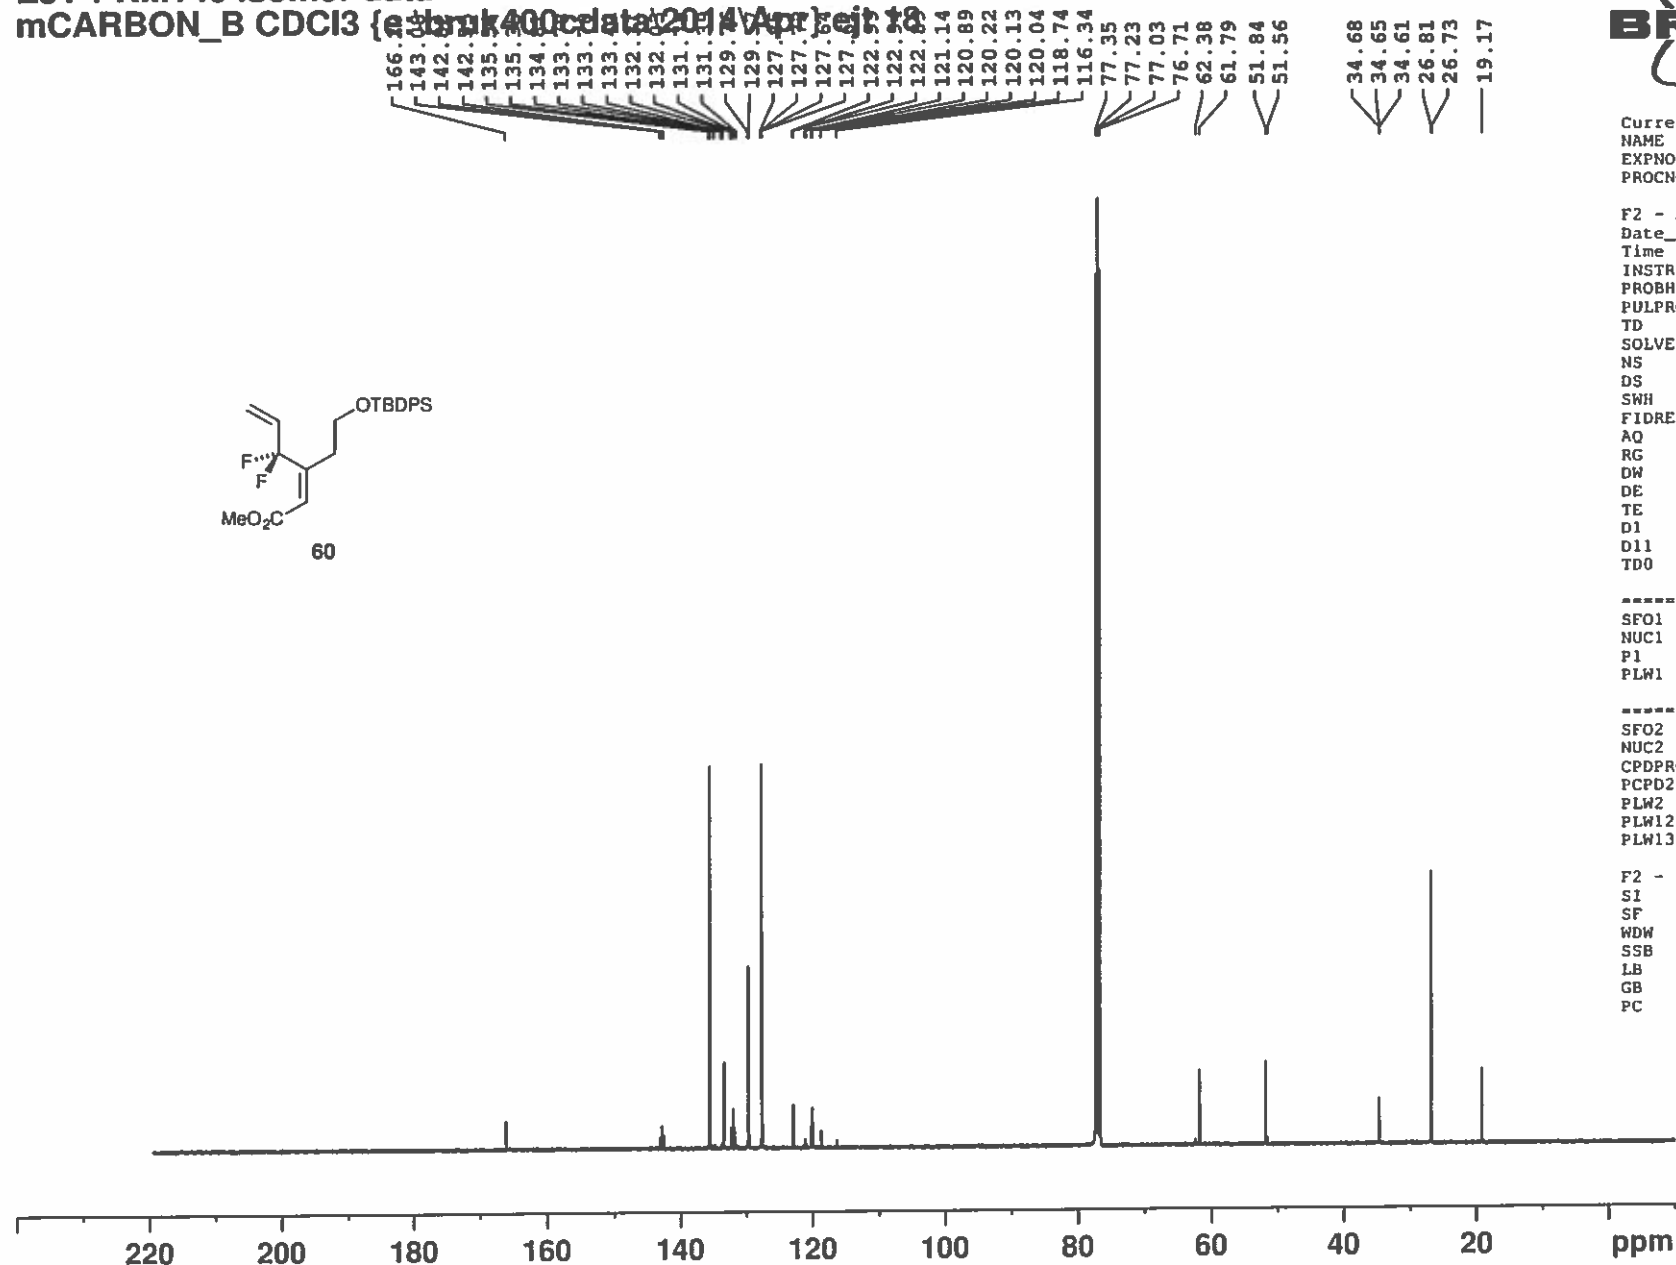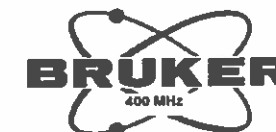

Current Data Parameters  
 NAME 2014-04-29-ejt-18  
 EXPNO 10  
 PROCNO 1

F2 - Acquisition Parameters  
 Date\_ 20140430  
 Time 3.49  
 INSTRUM spect  
 PROBHD 5 mm CPPBBO BB  
 PULPROG zgpg30  
 TD 65536  
 SOLVENT CDCl3  
 NS 1024  
 DS 4  
 SWH 24038.461 Hz  
 FIDRES 0.366798 Hz  
 AQ 1.3631488 sec  
 RG 45.2  
 DW 20.800 usec  
 DE 41.77 usec  
 TE 298.0 K  
 D1 2.00000000 sec  
 D11 0.03000000 sec  
 TDO 1

----- CHANNEL f1 -----  
 SFO1 100.6077379 MHz  
 NUC1 13C  
 P1 10.00 usec  
 PLW1 33.00000000 W

----- CHANNEL f2 -----  
 SFO2 400.0716003 MHz  
 NUC2 1H  
 CPDPRG12 waltz16  
 PCPD2 80.00 usec  
 PLW2 7.40000010 W  
 PLW12 0.17209999 W  
 PLW13 0.11014000 W

F2 - Processing parameters  
 SI 32768  
 SF 100.5976815 MHz  
 WDW EM  
 SSB 0  
 LB 1.00 Hz  
 GB 0  
 PC 1.40

This report was created by ACD/NMR Processor Academic Edition. For more information go to [www.acdlabs.com/nmrproc/](http://www.acdlabs.com/nmrproc/)

This report was created by ACD/NAME Processor Academic Edition. For more information, go to [www.academic.mnrlab.com](http://www.academic.mnrlab.com).

|                        |                                                                                                                  |                   |                                                                       |                        |              |
|------------------------|------------------------------------------------------------------------------------------------------------------|-------------------|-----------------------------------------------------------------------|------------------------|--------------|
| Acquisition Time (sec) | 0.7340                                                                                                           | Comment           | EJT-PRM146 f44-48 40mg mF19CPD CDCl3 (e:\bruk400data\2014\May) ejt 23 |                        |              |
| Date                   | 19 May 2014 19:08:00                                                                                             | Date Stamp        | 19 May 2014 19:08:00                                                  |                        |              |
| File Name              | \\ss7a.ds.man.ac.uk\vol5\VOL3\USERS\SNMRDATA\BRUK400DATA\2014\MAY\DATA\EJT\NMR\2014-05-19-EJT-23\22\PD\DATA\1\1R |                   |                                                                       |                        |              |
| Frequency (MHz)        | 376.50                                                                                                           | Nucleus           | 19F                                                                   | Number of Transients   | 16           |
| Original Points Count  | 65536                                                                                                            | Owner             | Administrator                                                         | Points Count           | 262144       |
| Receiver Gain          | 4100.00                                                                                                          | SW(cyclical) (Hz) | 89285.71                                                              | Solvent                | CHLOROFORM-d |
| Spectrum Type          | STANDARD                                                                                                         | Sweep Width (Hz)  | 89285.37                                                              | Temperature (degree C) | 22.600       |
|                        |                                                                                                                  |                   |                                                                       | Origin                 | AV400        |
|                        |                                                                                                                  |                   |                                                                       | Pulse Sequence         | zgig         |
|                        |                                                                                                                  |                   |                                                                       | Spectrum Offset (Hz)   | -37649.5977  |

2014-05-19-EJT-23.022.001.1R.esp VerticalScaleFactor 1

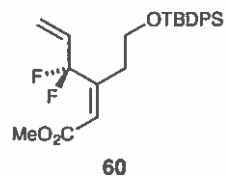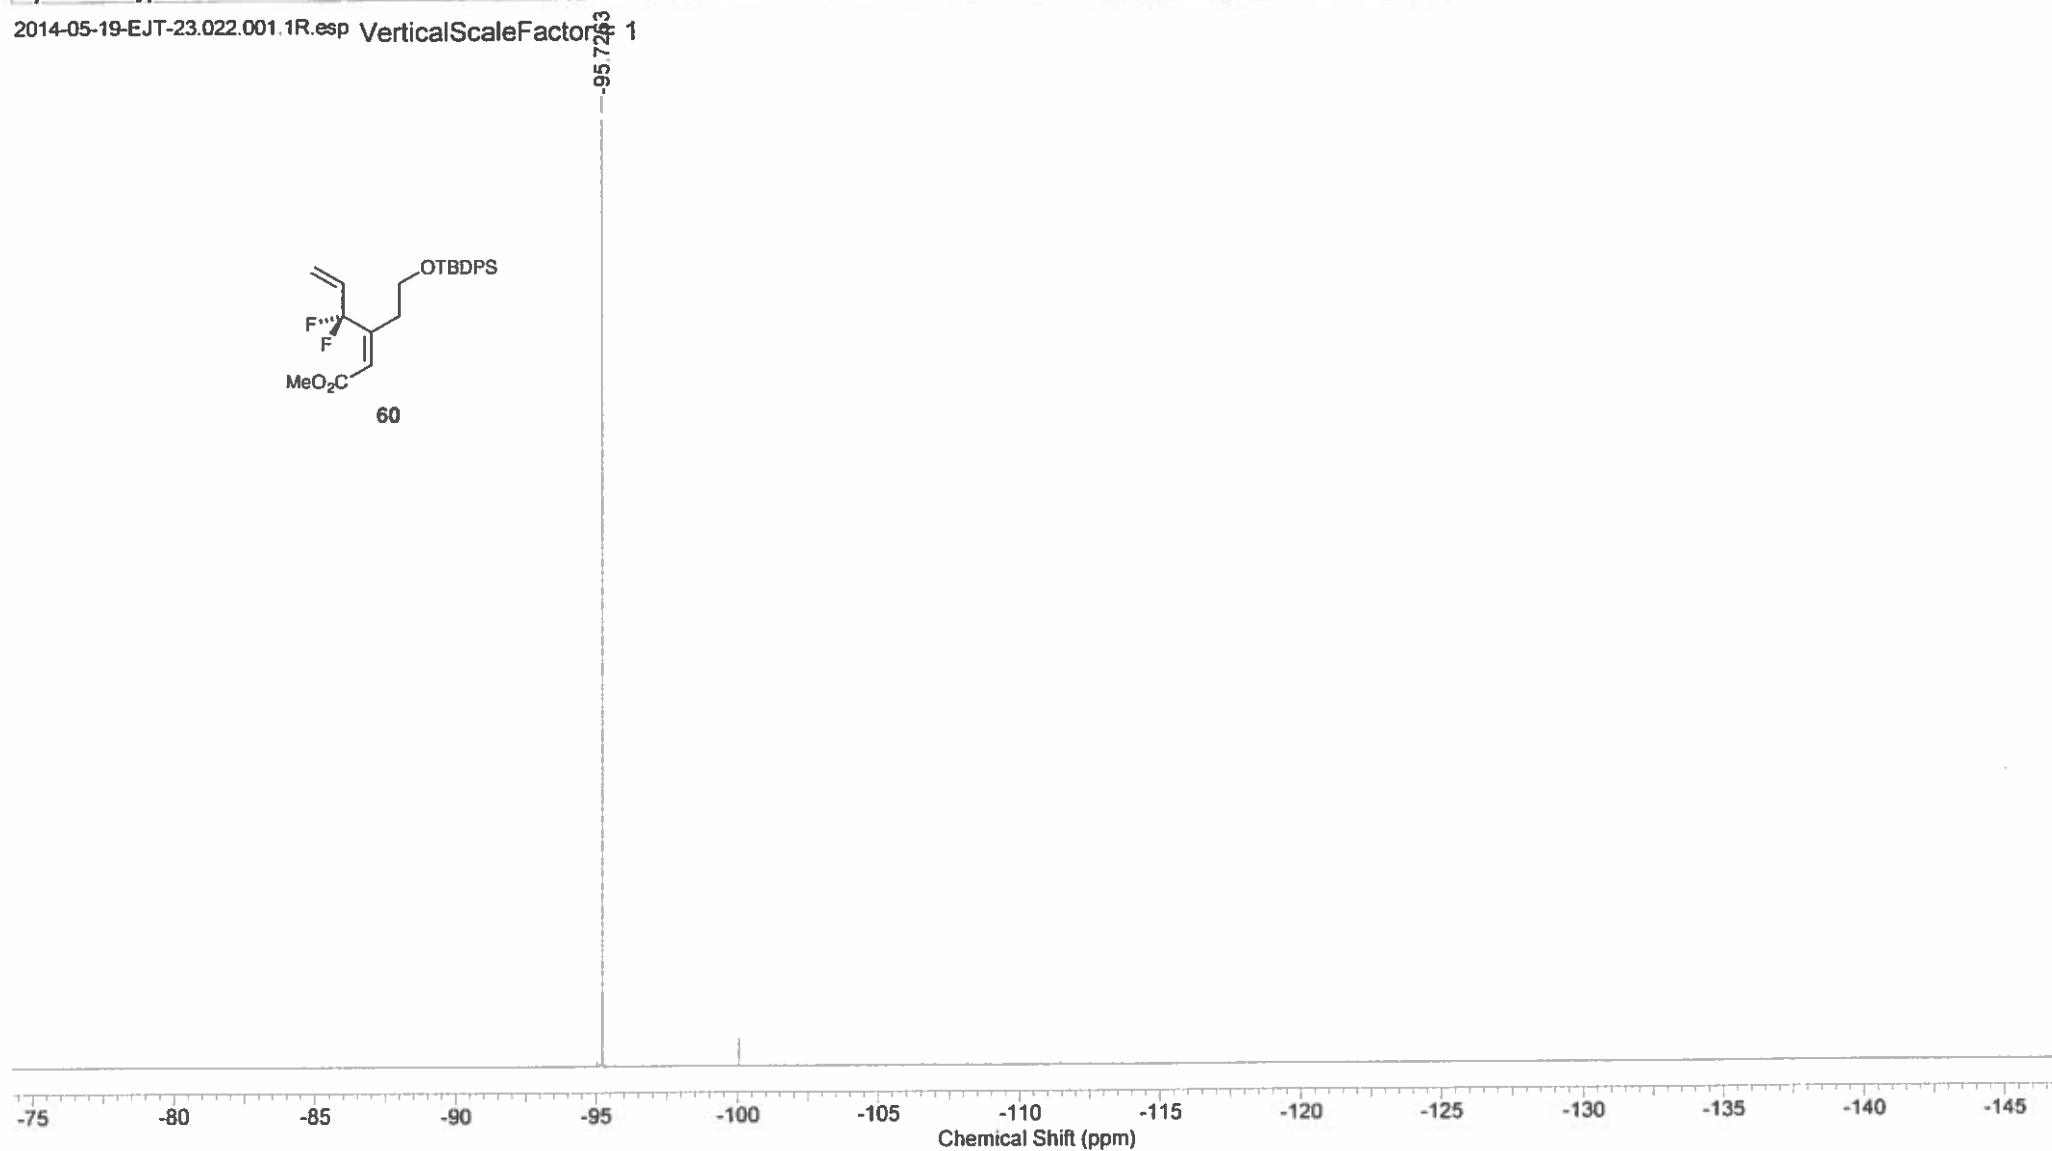



```

===== CHANNEL f1 =====
NUC1                      1H
P1                        10.00 usec
PL1                      -0.10 dB
PL1W                    26.21803665 W
SFO1                    500.1330885 MHz
SI                       32768
SF                      500.1300498 MHz
WDW                      EM
SSB                      0
LB                       0.30 Hz
GB                      0
PC                       1.00

```

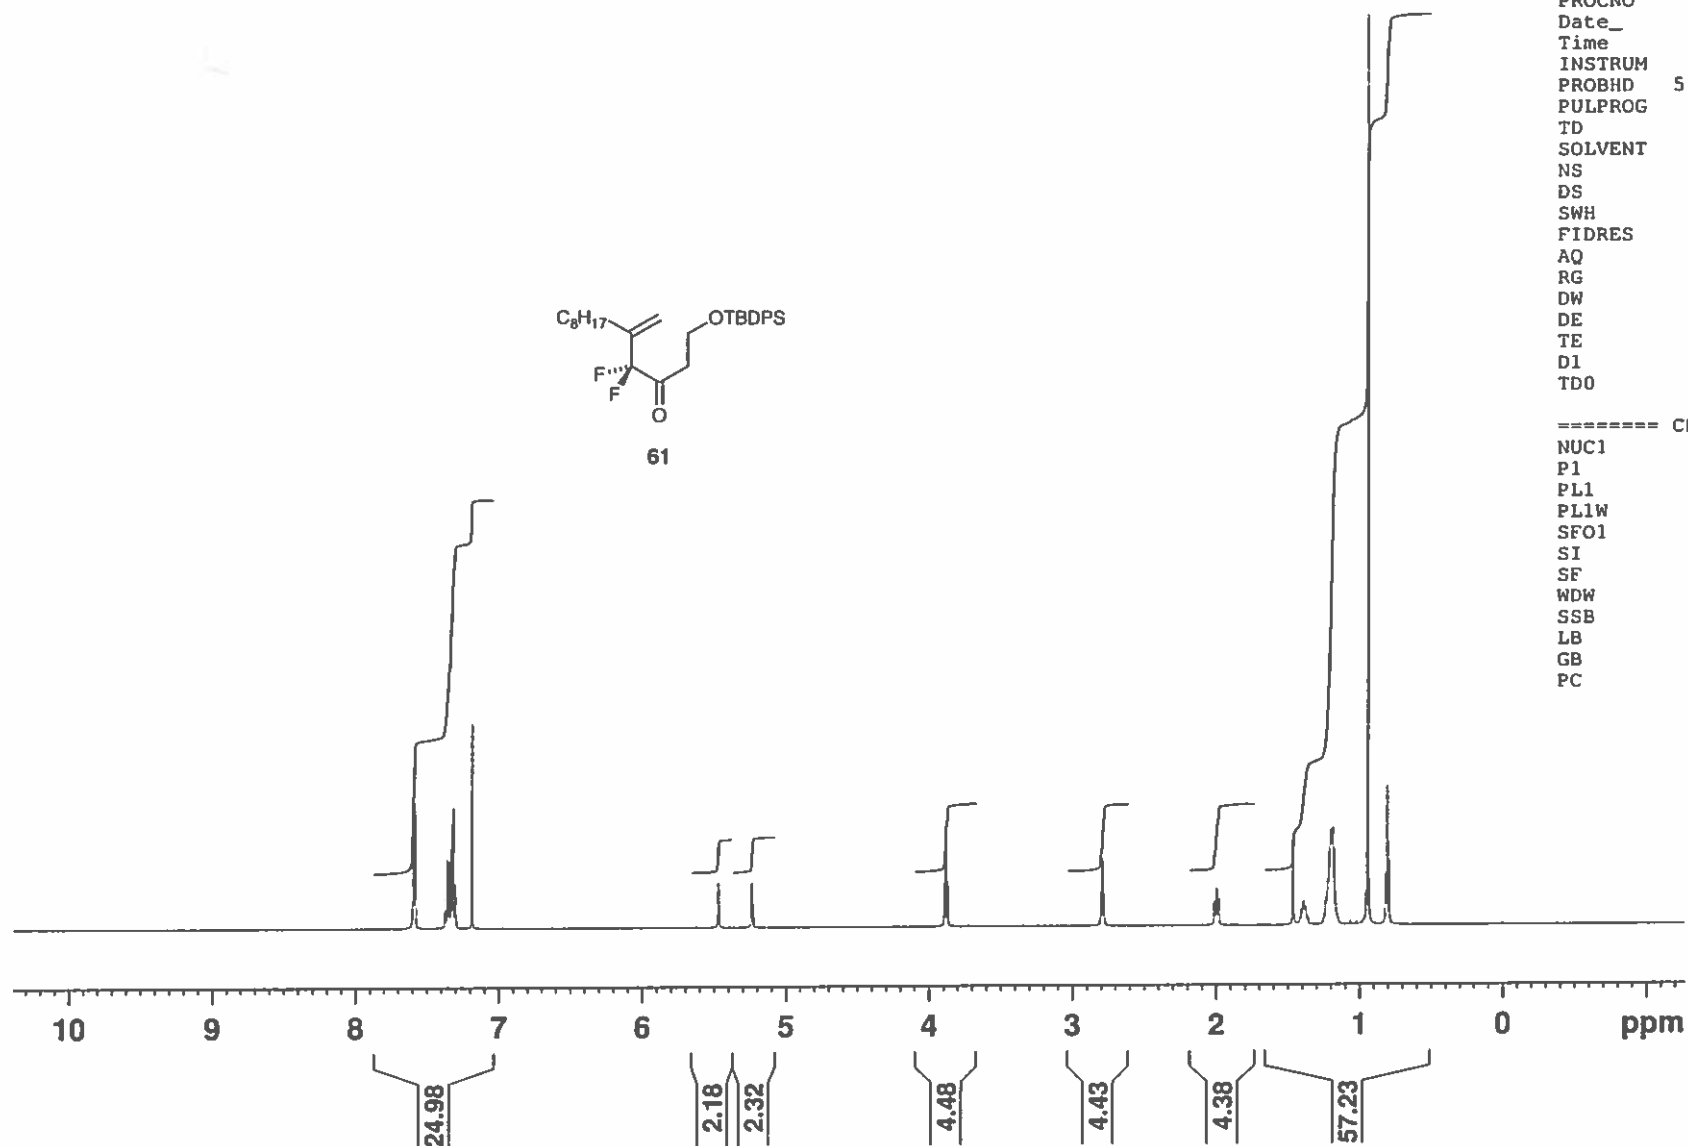



EJT-PRM132 f11-19 55mg

mCARBON\_B @CDCl3 (e-jt-400cdata 2014 Mar) ejt-34

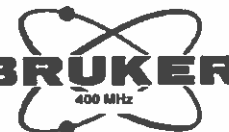

198.198.198.141.141.140.140.135.135.135.133.133.133.132.130.129.129.127.127.127.118.118.117.117.117.116.113.83.77.77.77.76.70.64.58.53.39.31.29.29.29.29.27.27.27.26.26.26.23.23.23

Current Data Parameters  
NAME 2014-03-05-ejt-34  
EXPNO 11  
PROCNO 1

F2 - Acquisition Parameters  
Date\_ 20140306  
Time 2.59  
INSTRUM spect  
PROBHD 5 mm CPPBBO BB  
PULPROG zgpg30  
TD 65536  
SOLVENT CDCl3  
NS 1024  
DS 4  
SWH 24038.461 Hz  
FIDRES 0.366798 Hz  
AQ 1.3631488 sec  
RG 45.2  
DW 20.800 usec  
DE 41.77 usec  
TE 298.0 K  
D1 2.00000000 sec  
D11 0.03000000 sec  
TD0 1

----- CHANNEL f1 -----  
SFO1 100.6077379 MHz  
NUC1 13C  
P1 10.00 usec  
PLW1 33.00000000 W

----- CHANNEL f2 -----  
SFO2 400.0716003 MHz  
NUC2 1H  
CPDPRG2 waltz16  
PCPD2 80.00 usec  
PLW2 7.40000010 W  
PLW12 0.17209999 W  
PLW13 0.11014000 W

F2 - Processing parameters  
SI 32768  
SF 100.5976815 MHz  
WDW EM  
SSB 0  
LB 1.00 Hz  
GB 0  
PC 1.40

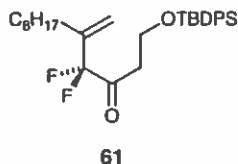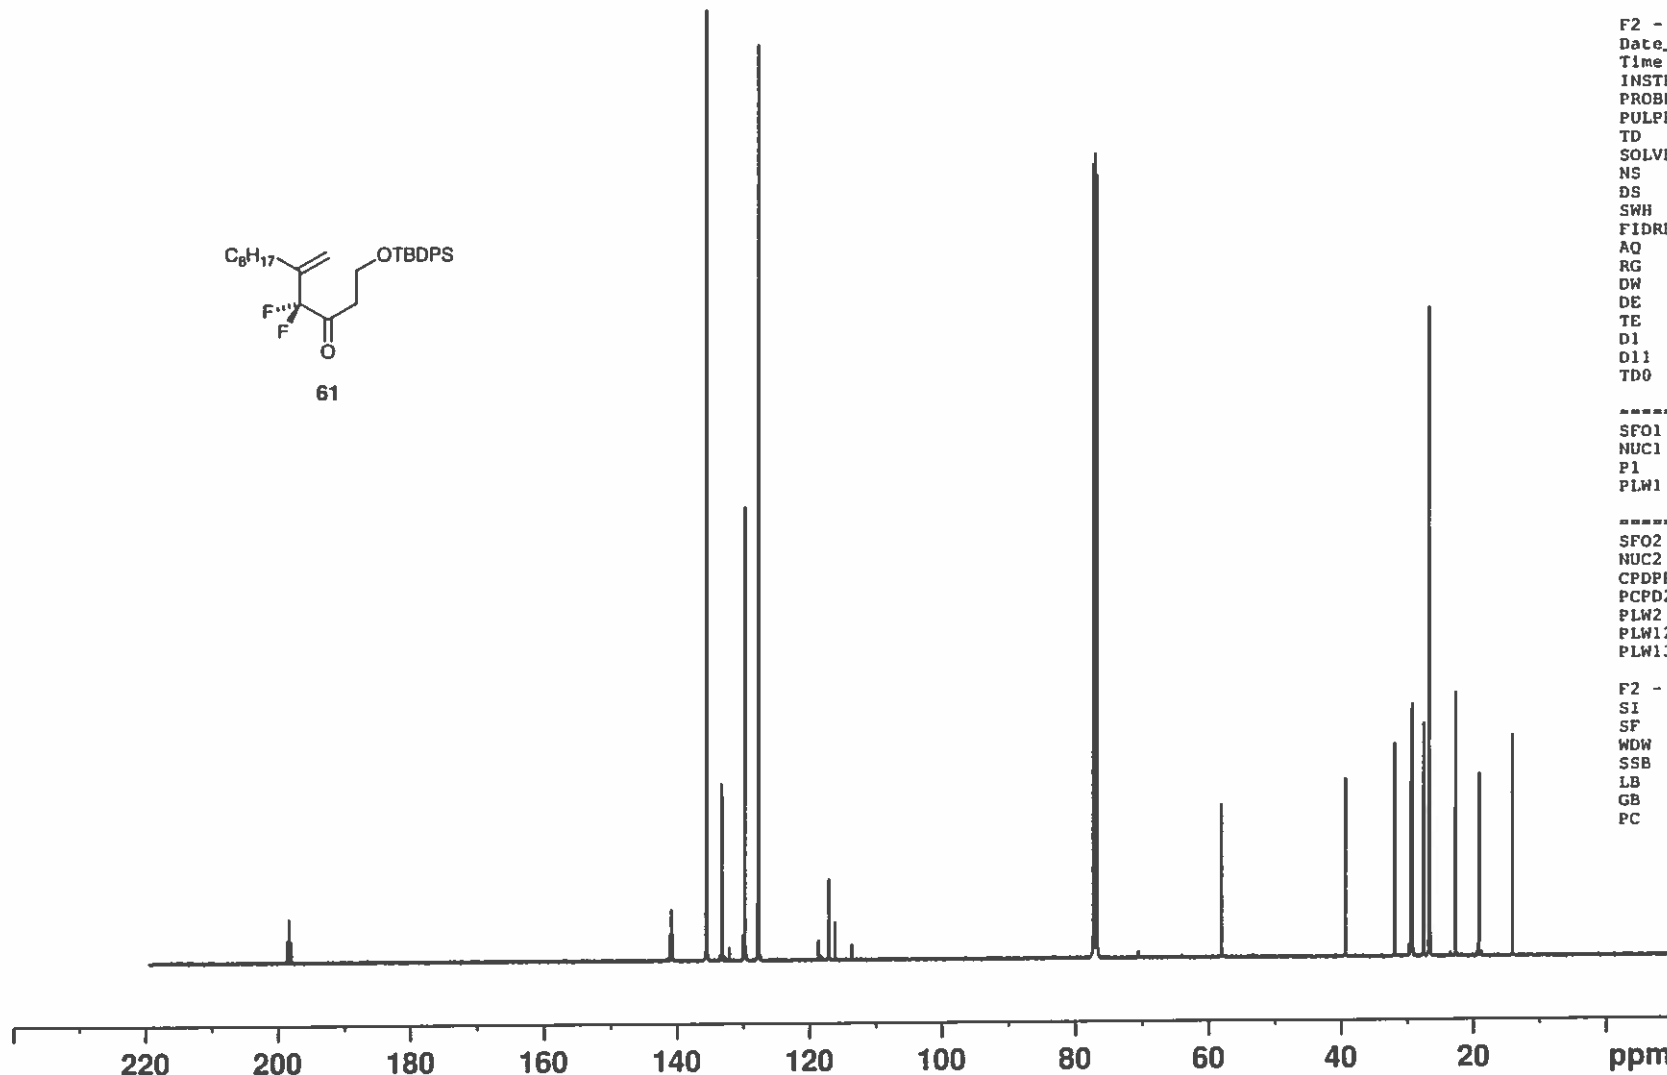

This report was created by ACD/NMR Processor Academic Edition. For more information go to [www.acdlabs.com/nmrproc/](http://www.acdlabs.com/nmrproc/)

|                        |                                                                                                                            |                   |                                                                             |                        |              |                      |             |
|------------------------|----------------------------------------------------------------------------------------------------------------------------|-------------------|-----------------------------------------------------------------------------|------------------------|--------------|----------------------|-------------|
| Acquisition Time (sec) | 0.5767                                                                                                                     | Comment           | EJT-PRM132 f5-10 7mg m19F CDCl3 /opt/oldbruk500data.11vii11/2014/Mar ejt 28 |                        |              |                      |             |
| Date                   | 03 Mar 2014 14:21:52                                                                                                       | Date Stamp        | 03 Mar 2014 14:21:52                                                        |                        |              |                      |             |
| File Name              | \\ss7a.ds.man.ac.uk\vol5\VOL3\USERS\SNMRDATA\BRUK500DATA\BRUK500DATA\2014\MAR\DATA\EJT\NMR\2014-03-03-EJT-28\11\PDATA\1\1R |                   |                                                                             |                        |              |                      |             |
| Frequency (MHz)        | 470.59                                                                                                                     | Nucleus           | 19F                                                                         | Number of Transients   | 16           | Origin               | spec1       |
| Original Points Count  | 65536                                                                                                                      | Owner             | vnmr1                                                                       | Points Count           | 65536        | Pulse Sequence       | zgfgn       |
| Receiver Gain          | 362.00                                                                                                                     | SW(cyclical) (Hz) | 113636.37                                                                   | Solvent                | CHLOROFORM-d | Spectrum Offset (Hz) | -47059.0234 |
| Spectrum Type          | STANDARD                                                                                                                   | Sweep Width (Hz)  | 113634.63                                                                   | Temperature (degree C) | 27.000       |                      |             |

PRM132-FNMR.esp

VerticalScaleFactor = 1

-109.7398

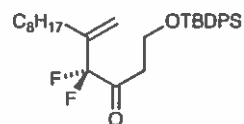

61

-92 -94 -96 -98 -100 -102 -104 -106 -108 -110 -112 -114 -116 -118 -120 -122 -124 -126 -128 -130 -132 -134 -136 -138 -140  
Chemical Shift (ppm)

EJT-PRM133 f16-21 4mg  
mPROTON CDCl3 /opt/oldbruk500data.11vii11/2014/Mar ejt 7

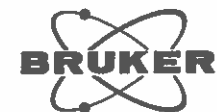

NAME 2014-03-07-ejt-7  
EXPNO 10  
PROCNO 1  
Date\_ 20140307  
Time 15.20  
INSTRUM spect  
PROBHD 5 mm PABBO BB-  
PULPROG zg30b  
TD 65536  
SOLVENT CDCl3  
NS 16  
DS 0  
SWH 10330.578 Hz  
FIDRES 0.157632 Hz  
AQ 3.1719923 sec  
RG 287  
DW 48.400 usec  
DE 13.00 usec  
TE 298.0 K  
D1 1.00000000 sec  
TD0 1

===== CHANNEL f1 =====  
NUC1 1H  
P1 10.00 usec  
PL1 -0.10 dB  
PL1W 26.21803665 W  
SFO1 500.1330885 MHz  
SI 32768  
SF 500.1300487 MHz  
WDW EM  
SSB 0  
LB 0.30 Hz  
GB 0  
PC 1.00

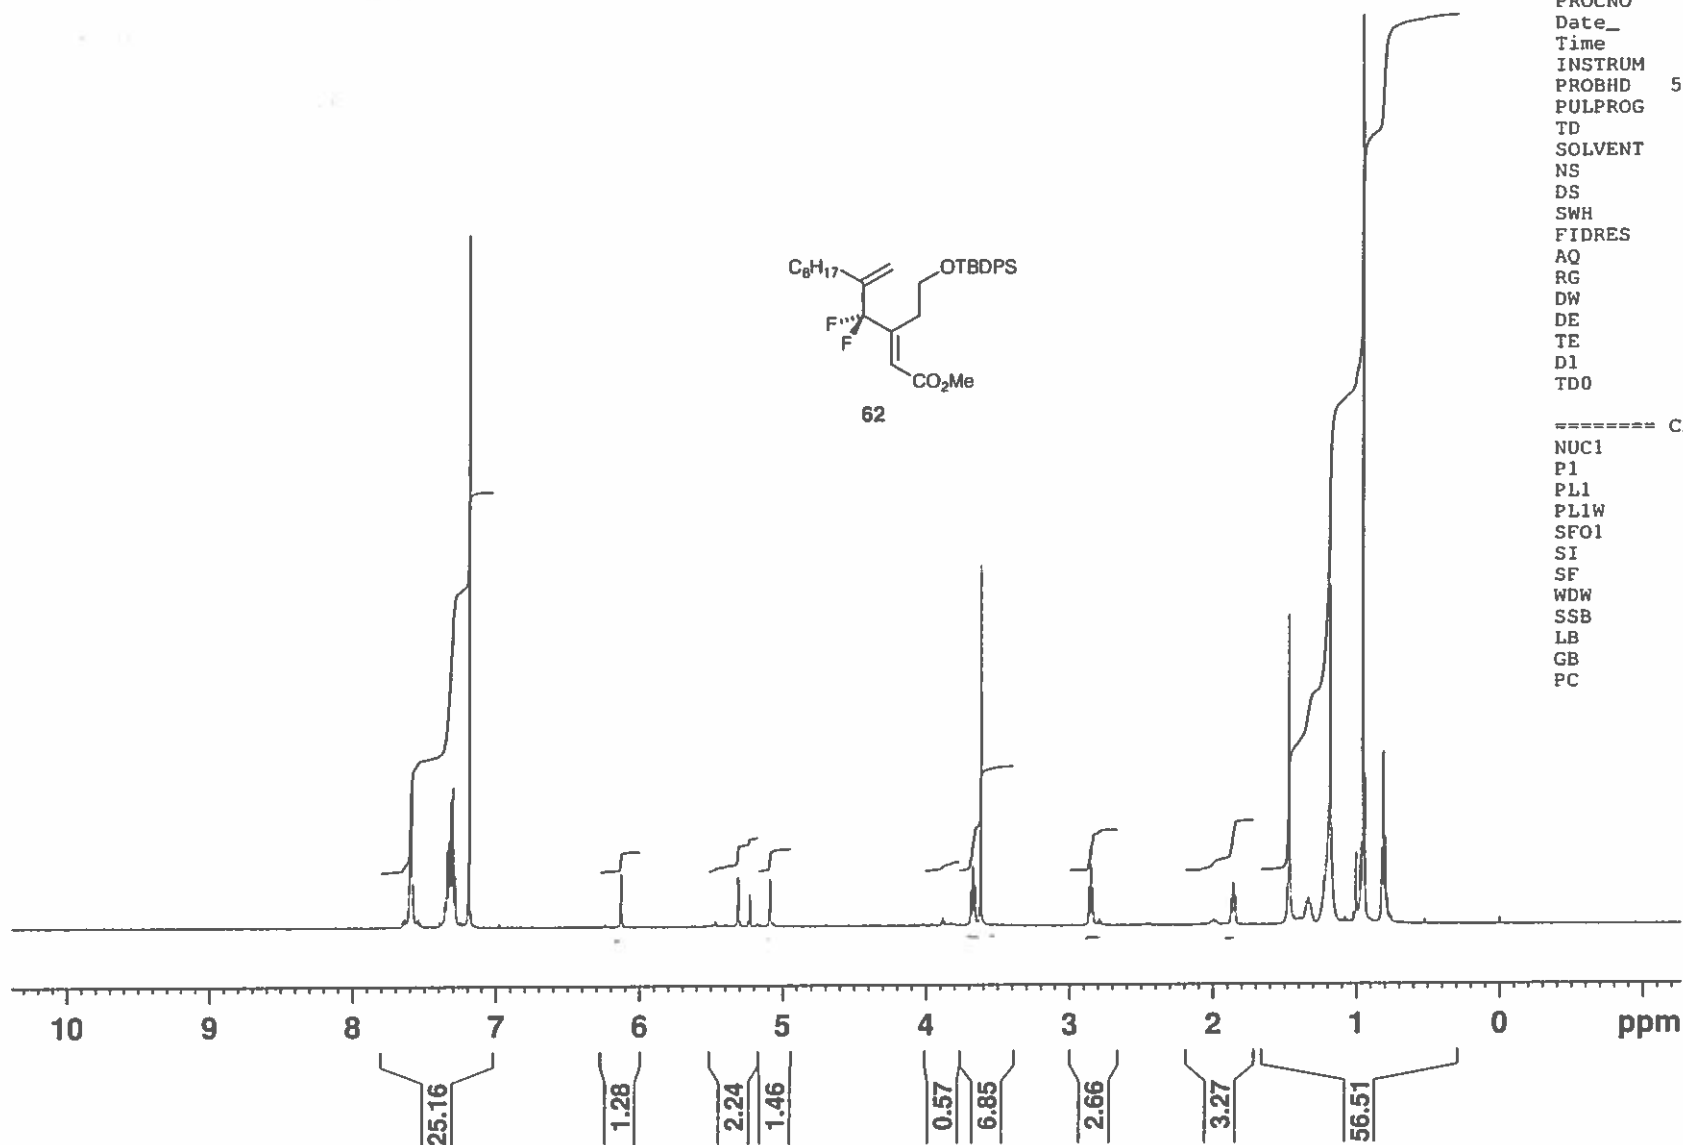

This report was created by ACD/NMR Processor Academic Edition. For more information go to [www.acdlabs.com/nmrproc/](http://www.acdlabs.com/nmrproc/)

This report was created by ACD/NAME Processor Academic Edition. For more information go to [www.acadab.com/nmr/proc/](http://www.acadab.com/nmr/proc/)

|                        |                                                                                                            |                        |                                                                                   |                      |            |                       |          |
|------------------------|------------------------------------------------------------------------------------------------------------|------------------------|-----------------------------------------------------------------------------------|----------------------|------------|-----------------------|----------|
| Acquisition Time (sec) | 1.1010                                                                                                     | Comment                | P. Mears EJT-PRM133prod 0614-032 mCARBON CDCl3 (E:\bruk500cdata\2014Jun) staff 42 |                      |            |                       |          |
| Date                   | 20 Jun 2014 07:19:44                                                                                       | Date Stamp             | 20 Jun 2014 07:19:44                                                              |                      |            |                       |          |
| File Name              | \\ss7a.ds.man.ac.uk\vol5\vol3\users\snmrdata\bruk500cdata\2014Jun\data\staff\nmr\2014-06-19-staff-42\12Vid |                        |                                                                                   |                      |            |                       |          |
| Nucleus                | 13C                                                                                                        | Number of Transients   | 10240                                                                             | Origin               | spect      | Frequency (MHz)       | 125.77   |
| Owner                  | nmrsu                                                                                                      | Points Count           | 32768                                                                             | Pulse Sequence       | zgpg30     | Original Points Count | 32768    |
| SW(cyclical) (Hz)      | 29761.90                                                                                                   | Solvent                | CHLOROFORM-d                                                                      | Spectrum Offset (Hz) | 12568.6943 | Receiver Gain         | 184.40   |
| Sweep Width (Hz)       | 29761.00                                                                                                   | Temperature (degree C) | 22.159                                                                            |                      |            | Spectrum Type         | STANDARD |

PRM133-CNMR.esp

VerticalScaleFactor = 1

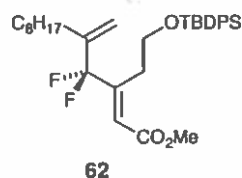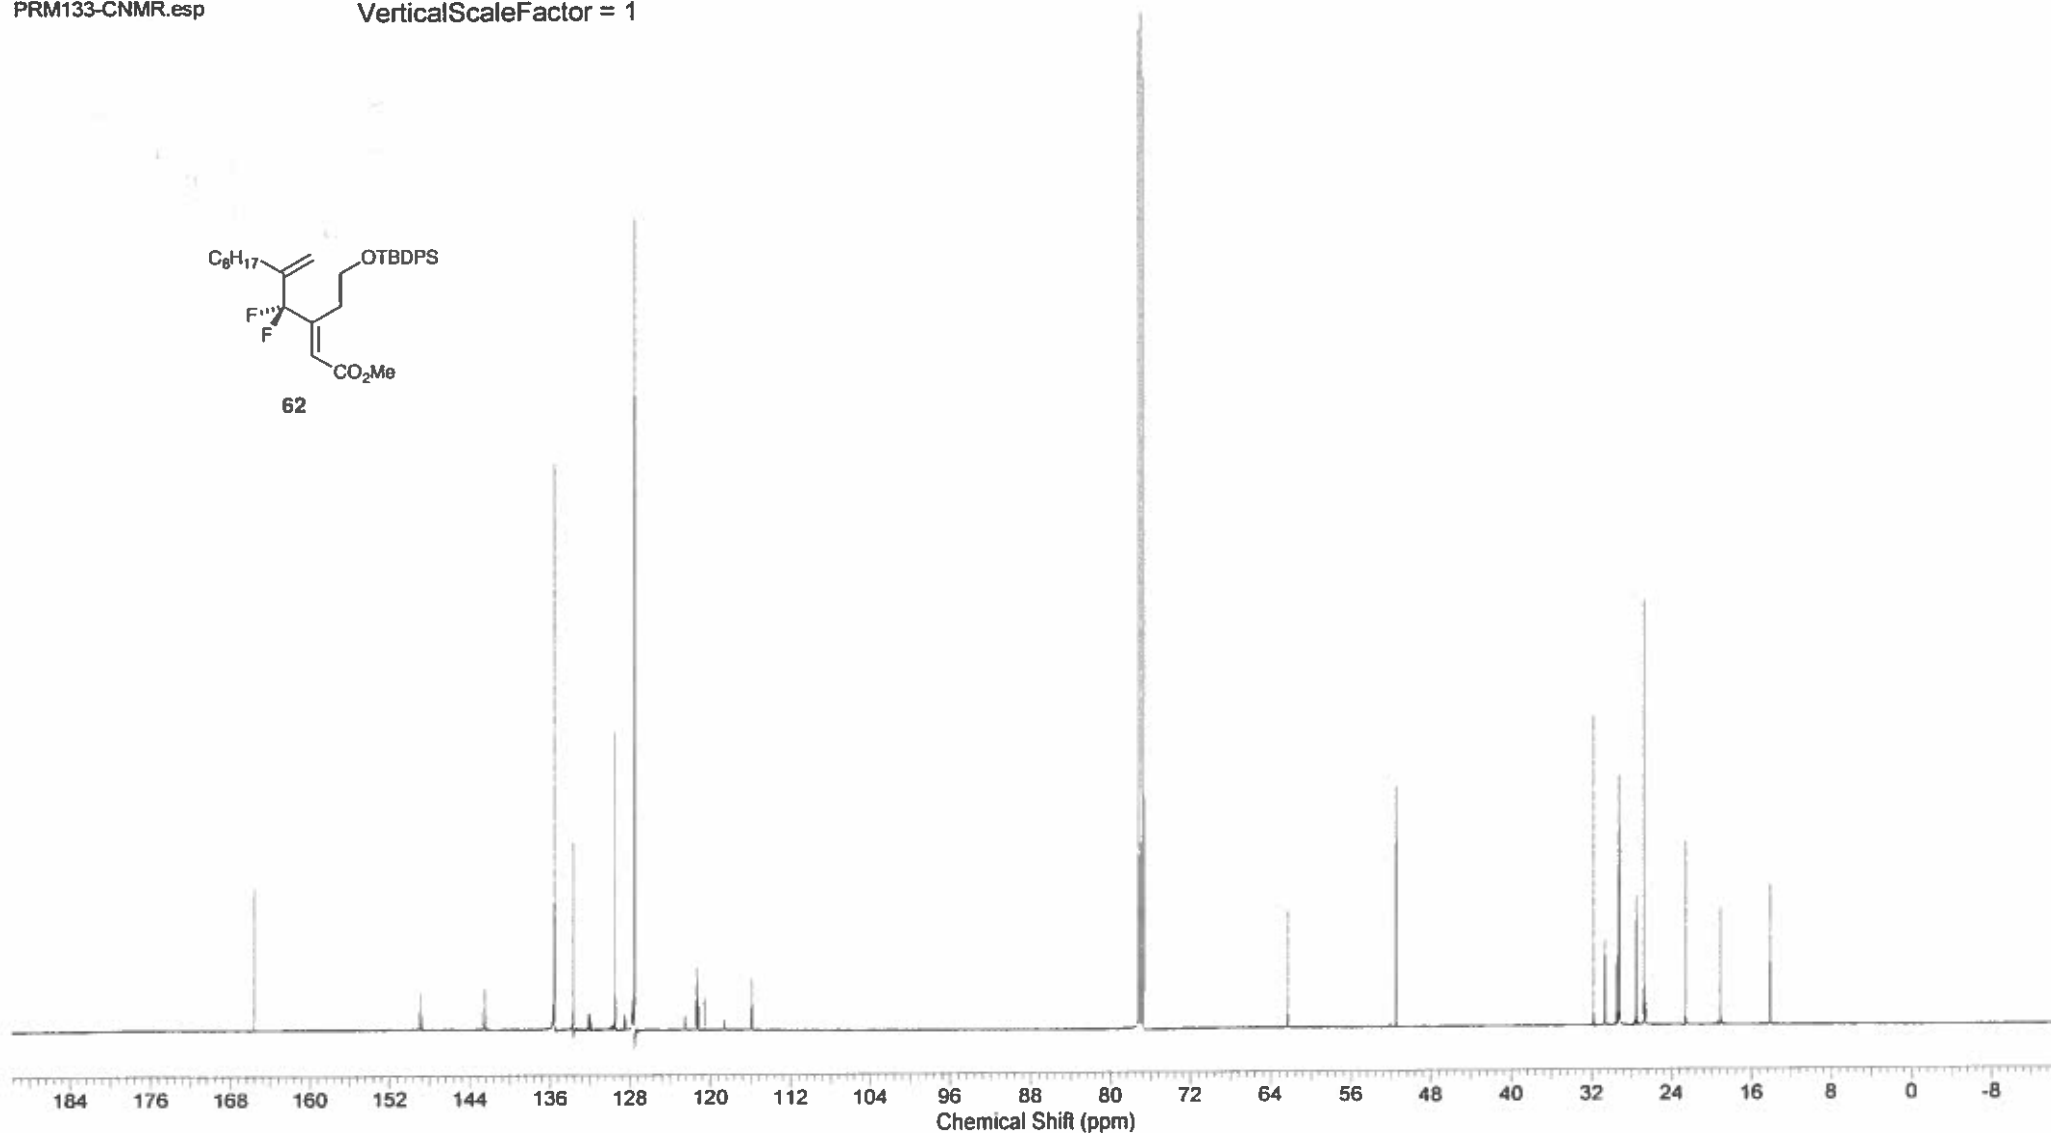

This report was created by ACD/NMR Processor Academic Edition. For more information go to [www.acdlabs.com/nmrproc/](http://www.acdlabs.com/nmrproc/)

|                        |                                                                                                         |                        |                                                                        |                      |             |
|------------------------|---------------------------------------------------------------------------------------------------------|------------------------|------------------------------------------------------------------------|----------------------|-------------|
| Acquisition Time (sec) | 0.7340                                                                                                  | Comment                | EJT-PRM133 f14-21 17mg mF19CPD CDCl3 (e:\bruk400adata\2014\Jun) ejt 28 |                      |             |
| Date                   | 17 Jun 2014 12:50:24                                                                                    | Date Stamp             | 17 Jun 2014 12:50:24                                                   |                      |             |
| File Name              | \\ss7a.ds.man.ac.uk\vol5\vol3\users\snmrdata\bruk400adata\2014\Jun\data\ejt\nmr\2014-06-17-ejt-28\12Vid |                        |                                                                        | Frequency (MHz)      | 376.50      |
| Nucleus                | 19F                                                                                                     | Number of Transients   | 16                                                                     | Origin               | AV400       |
| Owner                  | nrmru                                                                                                   | Points Count           | 65536                                                                  | Pulse Sequence       | zgig        |
| SW(cyclical) (Hz)      | 89285.71                                                                                                | Solvent                | CHLOROFORM-d                                                           | Spectrum Offset (Hz) | -37649.5977 |
| Sweep Width (Hz)       | 89284.35                                                                                                | Temperature (degree C) | 22.400                                                                 | Spectrum Type        | STANDARD    |

PRM133-F{H}NMR.esp

VerticalScaleFactor = 1

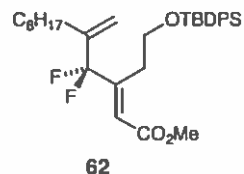

-101.9805

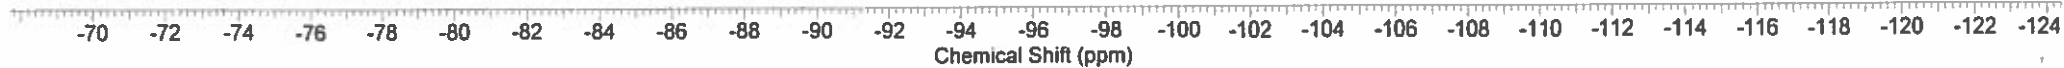

|                        |                      |                   |                                                                                                               |                        |                      |
|------------------------|----------------------|-------------------|---------------------------------------------------------------------------------------------------------------|------------------------|----------------------|
| Acquisition Time (sec) | 3.9649               | Comment           | EJT-PRM136 prod mPROTON CDCl3 {e:\bruk400data\2014\Mar} ejt 44                                                | Date                   | 14 Mar 2014 11:46:08 |
| Date Stamp             | 14 Mar 2014 11:46:08 | File Name         | \\ss7a.ds.man.ac.uk\vol5\VOL3\USERS\SNMRDATA\BRUK400DATA\2014\MAR\DATA\EJTWNR\2014-03-14-EJT-44\10\PDATA\1\1R |                        |                      |
| Frequency (MHz)        | 400.13               | Nucleus           | 1H                                                                                                            | Number of Transients   | 16                   |
| Original Points Count  | 32768                | Owner             | Administrator                                                                                                 | Points Count           | 32768                |
| Receiver Gain          | 128.00               | SW(cyclical) (Hz) | 8264.46                                                                                                       | Solvent                | CHLOROFORM-d         |
| Spectrum Type          | STANDARD             | Sweep Width (Hz)  | 8264.21                                                                                                       | Temperature (degree C) | 21.400               |
|                        |                      |                   |                                                                                                               | Origin                 | AV400                |
|                        |                      |                   |                                                                                                               | Pulse Sequence         | zg30b                |
|                        |                      |                   |                                                                                                               | Spectrum Offset (Hz)   | 2464 6750            |

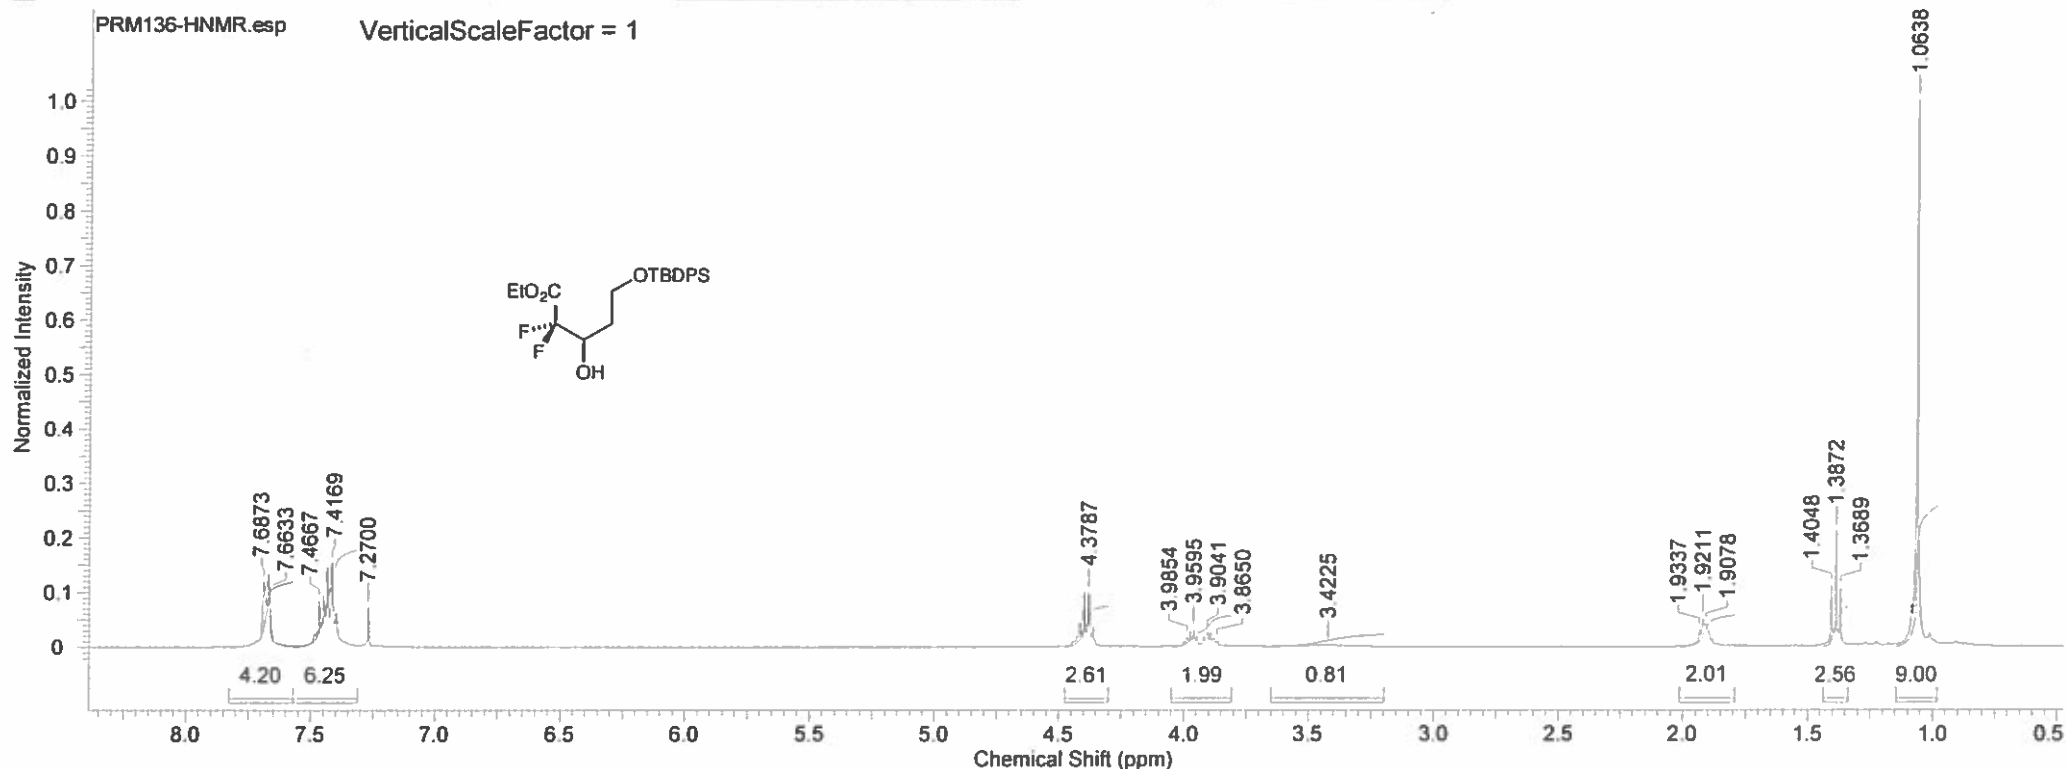

| No. | (ppm)         | Value      | Absolute Value | Non-Negative Value |
|-----|---------------|------------|----------------|--------------------|
| 1   | 3815 .. 1.148 | 99984264   | 1.72771696e+8  | 8.99984264         |
| 2   | 3378 .. 1.432 | 56114244   | 4.91667400e+7  | 2.56114244         |
| 3   | 934 .. 2.012  | 00694013   | 3.85276120e+7  | 2.00694013         |
| 4   | 1978 .. 3.650 | 80761468   | 1.55039330e+7  | 0.80761468         |
| 5   | 3076 .. 4.04  | 1.98614478 | 3.81284000e+7  | 1.98614478         |
| 6   | 3008 .. 4.472 | 61058092   | 5.01158200e+7  | 2.61058092         |
| 7   | 3095 .. 7.566 | 25181770   | 1.20017336e+8  | 6.25181770         |
| 8   | 5699 .. 7.824 | 1.9923115  | 8.06134400e+7  | 4.19923115         |

|                        |                                                                                        |                        |                                                                             |                      |            |                       |          |
|------------------------|----------------------------------------------------------------------------------------|------------------------|-----------------------------------------------------------------------------|----------------------|------------|-----------------------|----------|
| Acquisition Time (sec) | 1.0912                                                                                 | Comment                | EJT-PRM136 Prod data mCARBONnight CDCI3 (F:\bruk500_b_data\2014\Mar) ejt 59 |                      |            |                       |          |
| Date                   | 21 Mar 2014 21:41:20                                                                   | Date Stamp             | 21 Mar 2014 21:41:20                                                        |                      |            |                       |          |
| File Name              | \\ss7a.ds.man.ac.uk\vol5\vol3\users\snmr\data\bruk500\data\2014\Mar\data\ejt-59\10\vid |                        |                                                                             |                      |            | Frequency (MHz)       | 125.76   |
| Nucleus                | 13C                                                                                    | Number of Transients   | 3096                                                                        | Origin               | spect      | Original Points Count | 32768    |
| Owner                  | Administrator                                                                          | Points Count           | 32768                                                                       | Pulse Sequence       | zgpg30     | Receiver Gain         | 5792.60  |
| SW(cyclical) (Hz)      | 30030.03                                                                               | Solvent                | CHLOROFORM-d                                                                | Spectrum Offset (Hz) | 12566.0234 | Spectrum Type         | STANDARD |
| Sweep Width (Hz)       | 30029.11                                                                               | Temperature (degree C) | 25.000                                                                      |                      |            |                       |          |

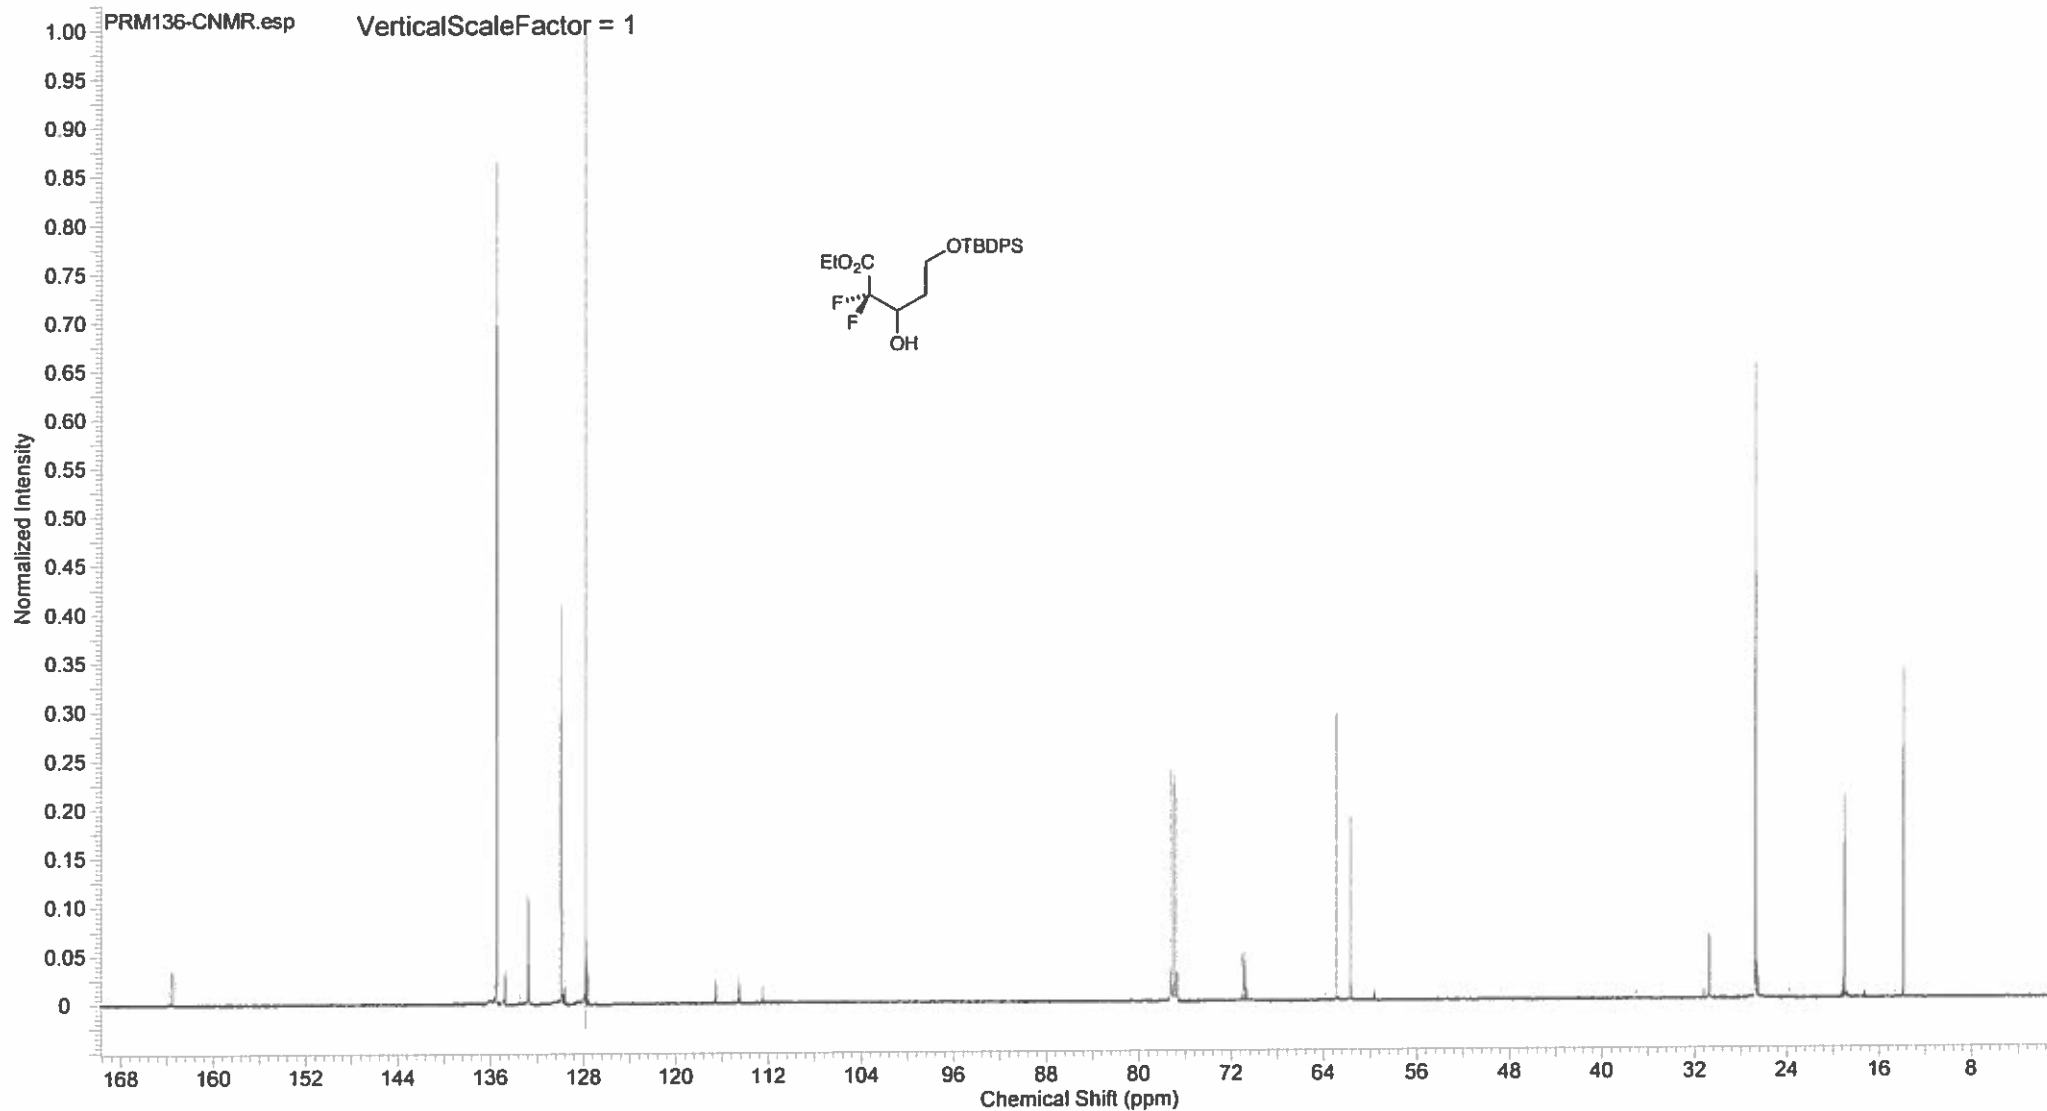

|                        |                      |                   |                                                                                                                |                        |              |                      |             |
|------------------------|----------------------|-------------------|----------------------------------------------------------------------------------------------------------------|------------------------|--------------|----------------------|-------------|
| Acquisition Time (sec) | 0.7340               | Comment           | EJT-PRM136 prod mF19CPD CDCl3 (e:\bruk400data\2014\Mar) ejt 44                                                 |                        | Date         | 14 Mar 2014 11:46:08 |             |
| Date Stamp             | 14 Mar 2014 11:46:08 | File Name         | \\ss7a.ds.man.ac.uk\vol5\VOL3\USERS\SNMRDATA\BRUK400DATA\2014\MAR\DATA\EJT\NMR\2014-03-14-EJT-44\11\PDATA\1\1R |                        |              |                      |             |
| Frequency (MHz)        | 376.50               | Nucleus           | 19F                                                                                                            | Number of Transients   | 16           | Origin               | AV400       |
| Original Points Count  | 65536                | Owner             | Administrator                                                                                                  | Points Count           | 262144       | Pulse Sequence       | zgig        |
| Receiver Gain          | 4100.00              | SW(cyclical) (Hz) | 89285.71                                                                                                       | Solvent                | CHLOROFORM-d | Spectrum Offset (Hz) | -37649.5977 |
| Spectrum Type          | STANDARD             | Sweep Width (Hz)  | 89285.37                                                                                                       | Temperature (degree C) | 21.600       |                      |             |

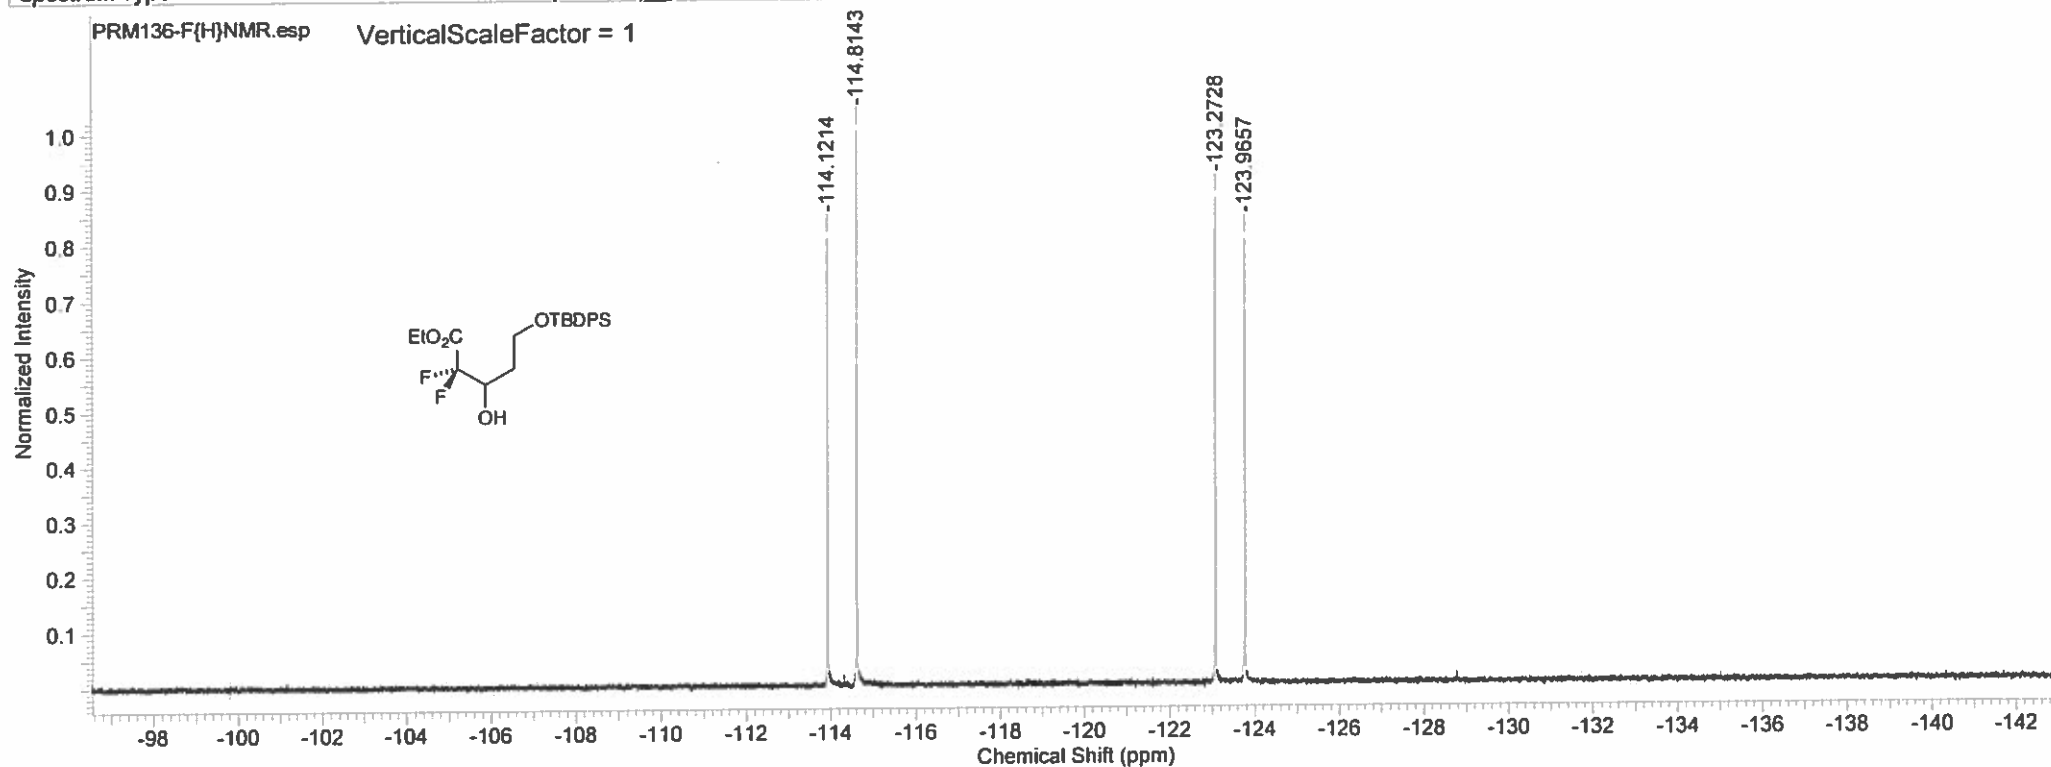

| No. | (ppm)   | (Hz)     | Height |
|-----|---------|----------|--------|
| 1   | -123.97 | -46672.9 | 0.8015 |
| 2   | -123.27 | -46412.0 | 0.8765 |
| 3   | -114.81 | -43227.4 | 1.0000 |
| 4   | -114.12 | -42966.5 | 0.8086 |



EJT-PRM137 DMP f21-26 22mg  
mPROTON CDCl3 /opt/oldbruk500data.11vii11/2014/Mar ejt 56

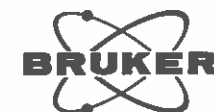

NAME 2014-03-14-ejt-56  
EXPNO 10  
PROCNO 1  
Date\_ 20140314  
Time 15.04  
INSTRUM spect  
PROBHD 5 mm PABBO BB-  
PULPROG zg30b  
TD 65536  
SOLVENT CDCl3  
NS 16  
DS 0  
SWH 10330.578 Hz  
FIDRES 0.157632 Hz  
AQ 3.1719923 sec  
RG 90.5  
DW 48.400 usec  
DE 13.00 usec  
TE 298.1 K  
D1 1.00000000 sec  
TD0 1

===== CHANNEL f1 =====  
NUC1 1H  
P1 10.00 usec  
PL1 -0.10 dB  
PL1W 26.21803665 W  
SF01 500.1330885 MHz  
SI 32768  
SF 500.1300535 MHz  
WDW EM  
SSB 0  
LB 0.30 Hz  
GB 0  
PC 1.00

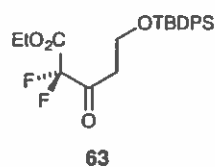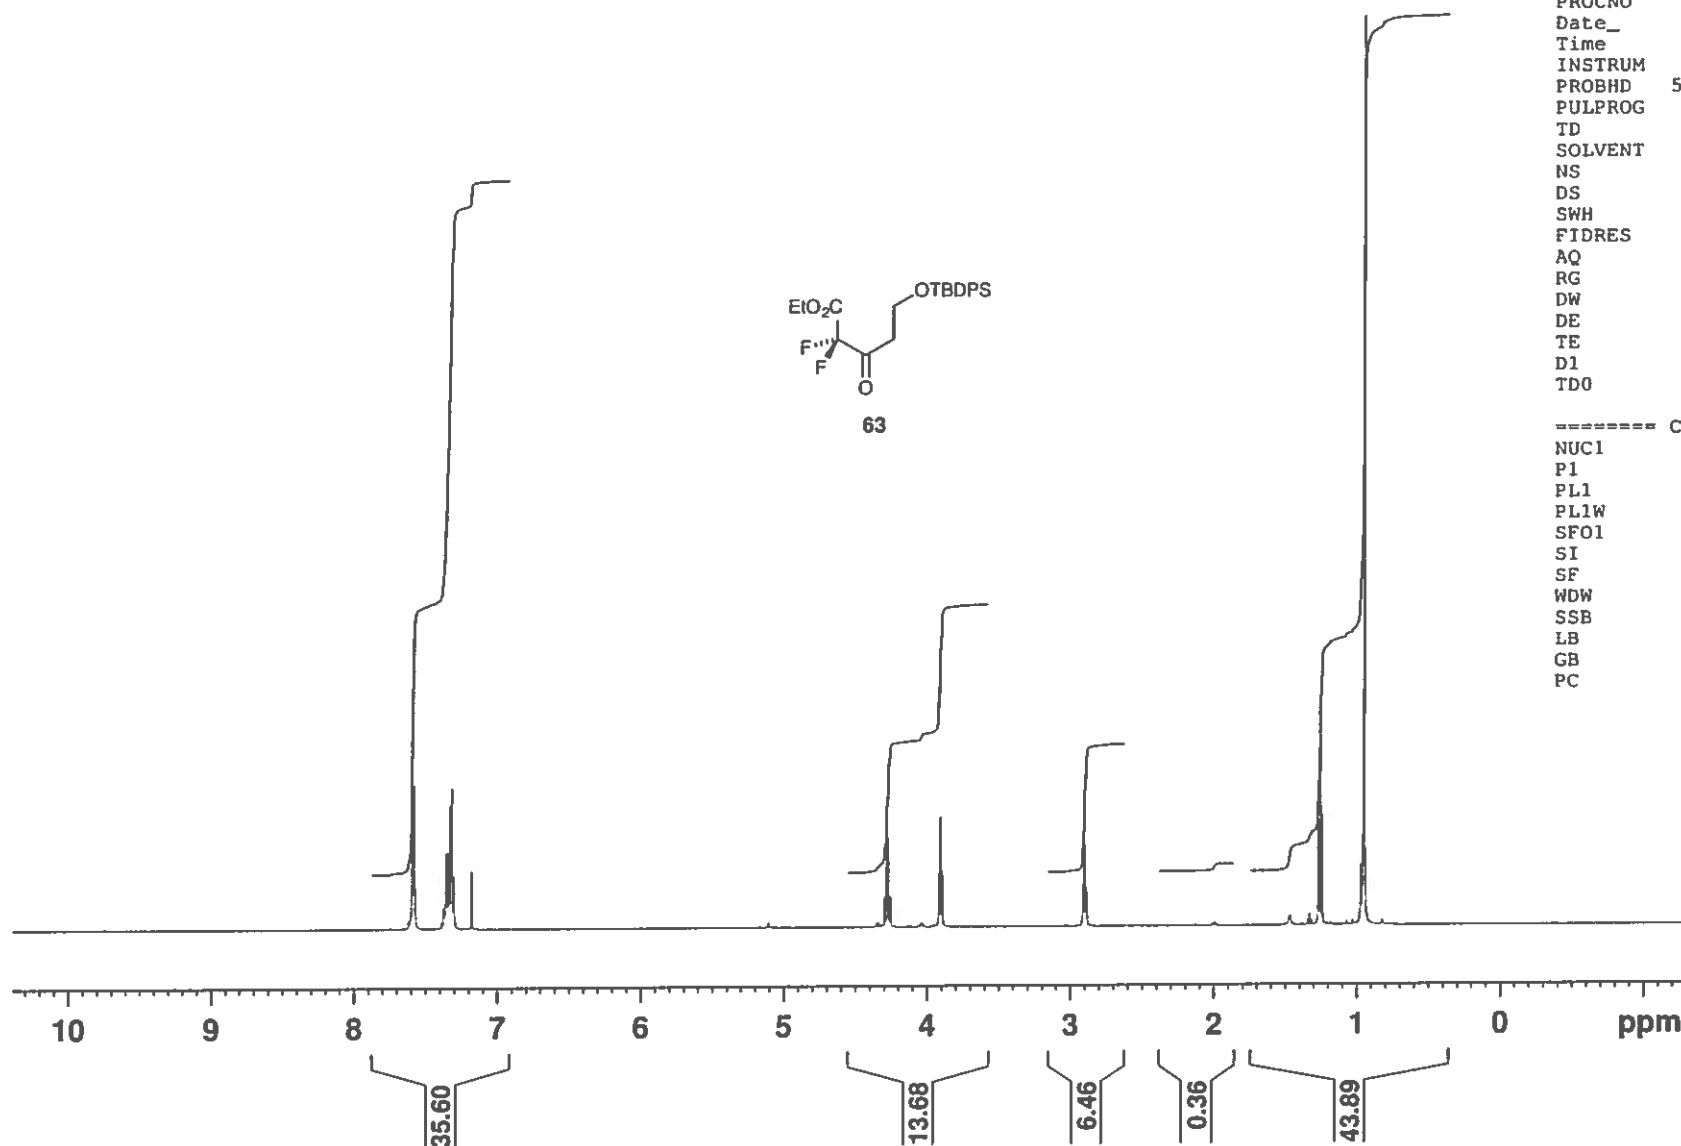

EJT-PRM137 f21-28 47mg

mCARBON\_B CDCl3 (e:\bruk400\data\2014\Mar\ejt-25

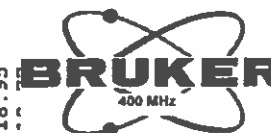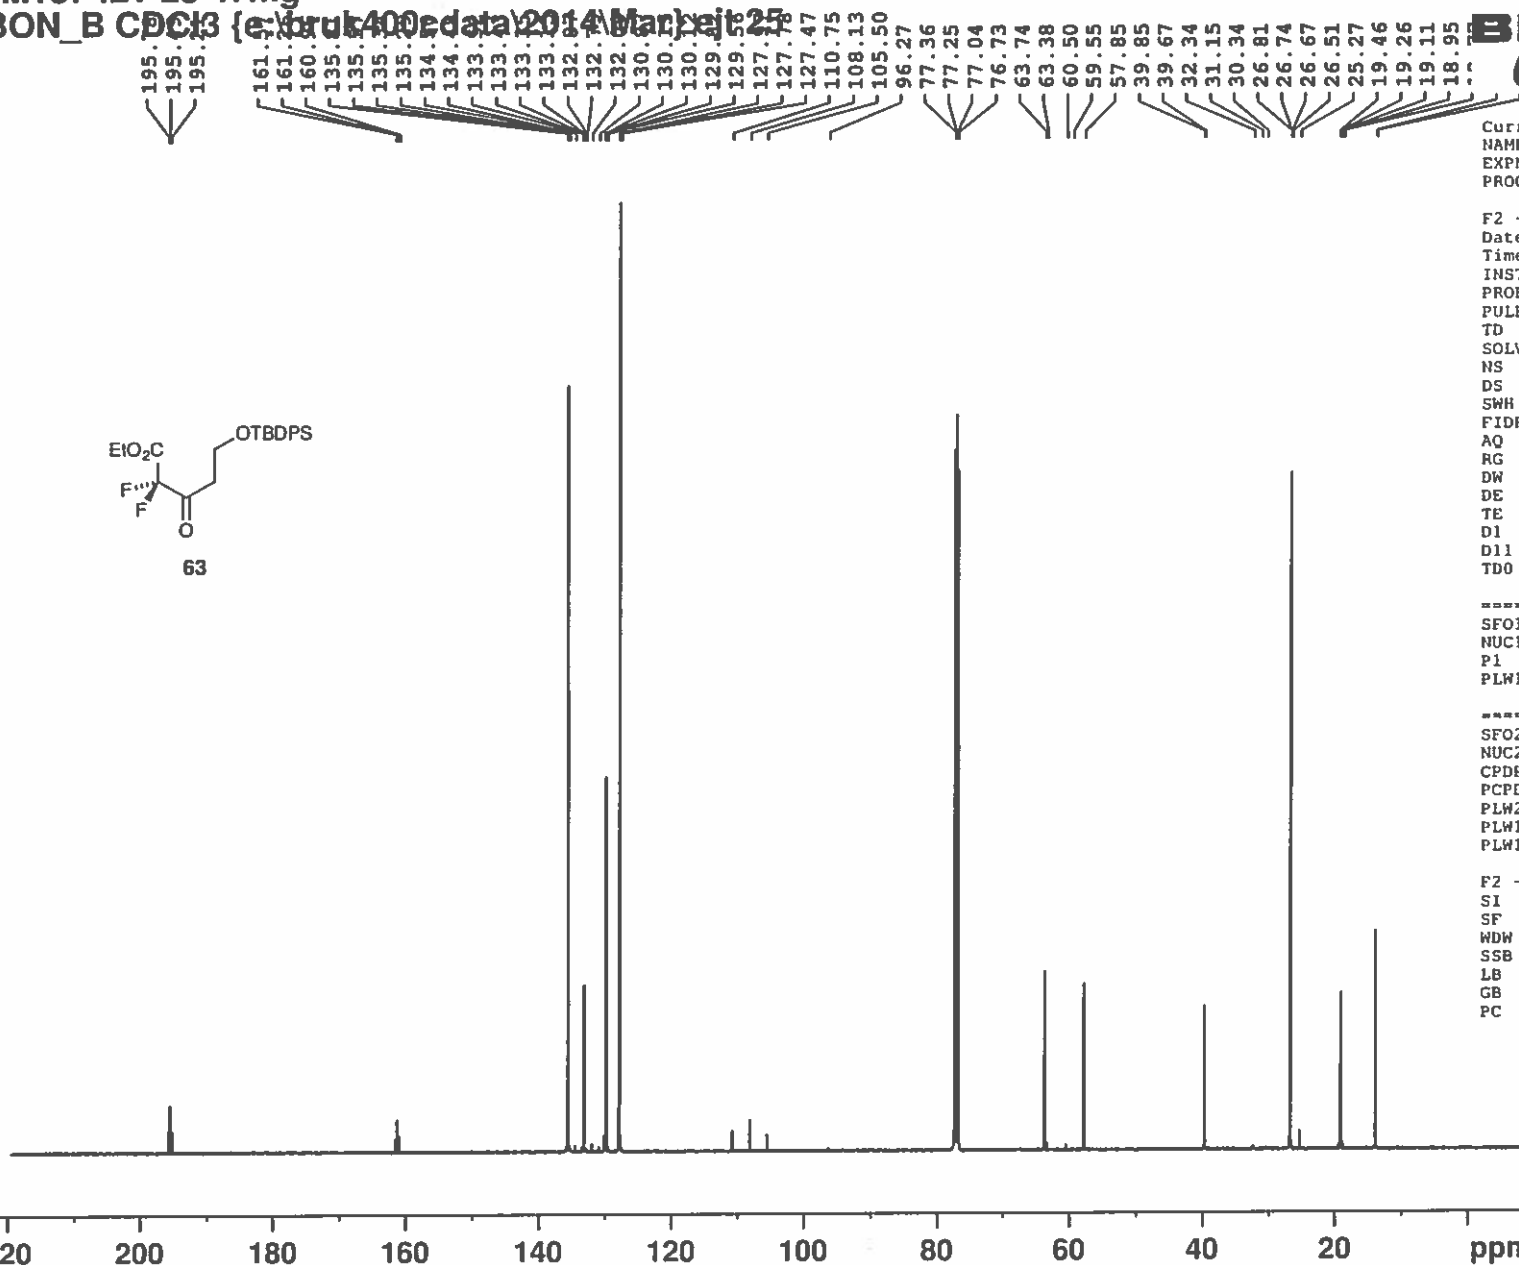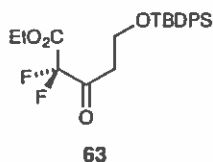

Current Data Parameters  
 NAME 2014-03-17-ejt-25  
 EXPNO 10  
 PROCNO 1

F2 - Acquisition Parameters  
 Date\_ 20140317  
 Time 23.20  
 INSTRUM spect  
 PROBHD 5 mm CPPBBO BB  
 PULPROG zgpg30  
 TD 65536  
 SOLVENT CDCl3  
 NS 1024  
 DS 4  
 SWH 24038.461 Hz  
 FIDRES 0.366798 Hz  
 AQ 1.3631488 sec  
 RG 45.2  
 DW 20.800 usec  
 DE 41.77 usec  
 TE 298.0 K  
 D1 2.00000000 sec  
 D11 0.03000000 sec  
 TDO 1

===== CHANNEL f1 =====  
 SFO1 100.6077379 MHz  
 NUC1 13C  
 P1 10.00 usec  
 PLW1 33.00000000 W

===== CHANNEL f2 =====  
 SFO2 400.0716003 MHz  
 NUC2 1H  
 CPDPRG12 waltz16  
 PCPD2 80.00 usec  
 PLW2 7.40000010 W  
 PLW12 0.17209999 W  
 PLW13 0.11014000 W

F2 - Processing parameters  
 SI 32768  
 SF 100.5976815 MHz  
 WDW EM  
 SSB 0  
 LB 1.00 Hz  
 GB 0  
 PC 1.40

|                        |                                                                                                                           |                   |                                                                                      |                        |              |                      |             |
|------------------------|---------------------------------------------------------------------------------------------------------------------------|-------------------|--------------------------------------------------------------------------------------|------------------------|--------------|----------------------|-------------|
| Acquisition Time (sec) | 0.5767                                                                                                                    | Comment           | EJT-PRM137 DMP f21-26 22mg m19FCPD CDCl3 /opt/oldbruk500data.11vii11/2014/Mar ejt 56 |                        |              |                      |             |
| Date                   | 14 Mar 2014 15:08:48                                                                                                      | Date Stamp        | 14 Mar 2014 15:08:48                                                                 |                        |              |                      |             |
| File Name              | \\ss7a.ds.man.ac.uk\vol5VOL3\USERS\SNMRDATA\BRUK500DATA\BRUK500DATA\2014\MAR\DATA\EJT\NMR\2014-03-14-EJT-56\12\PDATA\111R |                   |                                                                                      |                        |              |                      |             |
| Frequency (MHz)        | 470.59                                                                                                                    | Nucleus           | 19F                                                                                  | Number of Transients   | 16           | Origin               | spect       |
| Original Points Count  | 65536                                                                                                                     | Owner             | vnmr1                                                                                | Points Count           | 65536        | Pulse Sequence       | zgfhigqn    |
| Receiver Gain          | 912.00                                                                                                                    | SW(cyclical) (Hz) | 113636.37                                                                            | Solvent                | CHLOROFORM-d | Spectrum Offset (Hz) | -47059.0234 |
| Spectrum Type          | STANDARD                                                                                                                  | Sweep Width (Hz)  | 113634.63                                                                            | Temperature (degree C) | 27.000       |                      |             |

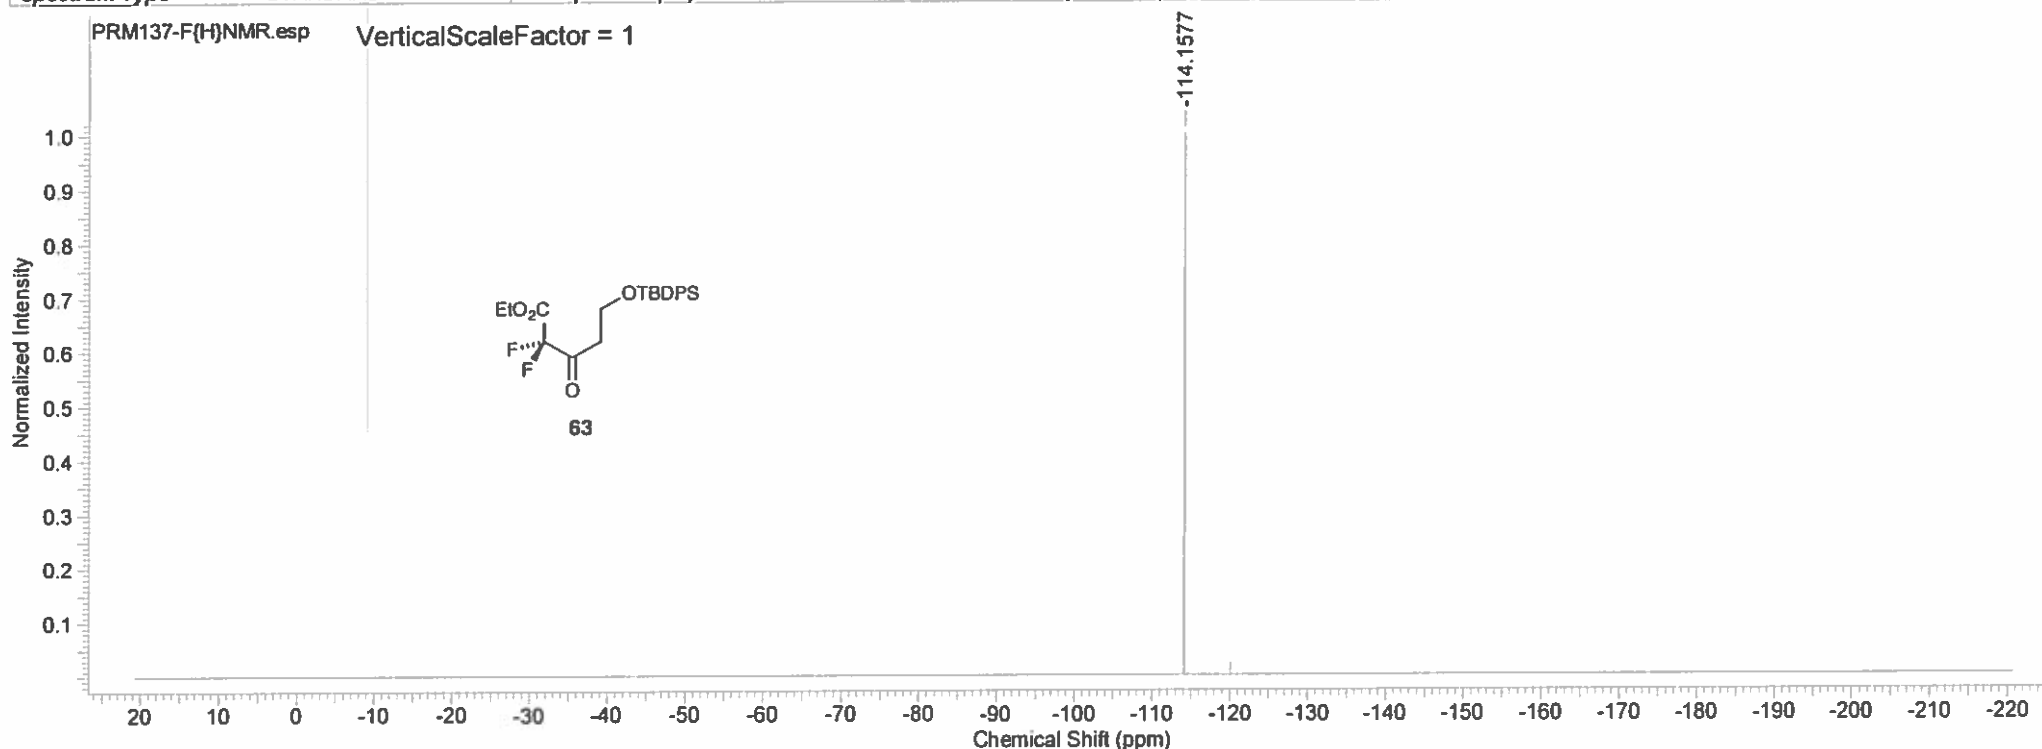

| No. | (ppm)   | (Hz)     | Height |
|-----|---------|----------|--------|
| 1   | -114.16 | -53721.7 | 1.0000 |

EJT-PRM147 f17-27 31mg  
mPROTON CDCl3 {e:\bruk400data\2014\Apr} ejt 50

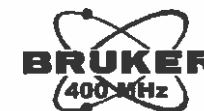

NAME 2014-04-05-ejt-50  
EXPNO 10  
PROCNO 1  
Date\_ 20140405  
Time 11.59  
INSTRUM AV400  
PROBHD 5 mm PABBO BB-  
PULPROG zg30b  
TD 65536  
SOLVENT CDCl3  
NS 16  
DS 0  
SWH 8264.463 Hz  
FIDRES 0.126106 Hz  
AQ 3.9649780 sec  
RG 128  
DW 60.500 usec  
DE 8.45 usec  
TE 294.6 K  
D1 1.00000000 sec  
TD0 1

===== CHANNEL f1 =====  
NUC1 1H  
P1 14.50 usec  
PL1 -3.60 dB  
PL1W 17.83863831 W  
SFO1 400.1324710 MHz  
SI 32768  
SF 400.1300416 MHz  
WDW EM  
SSB 0  
LB 0.30 Hz  
GB 0  
PC 1.00

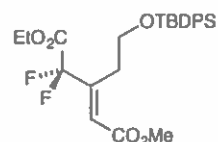

64

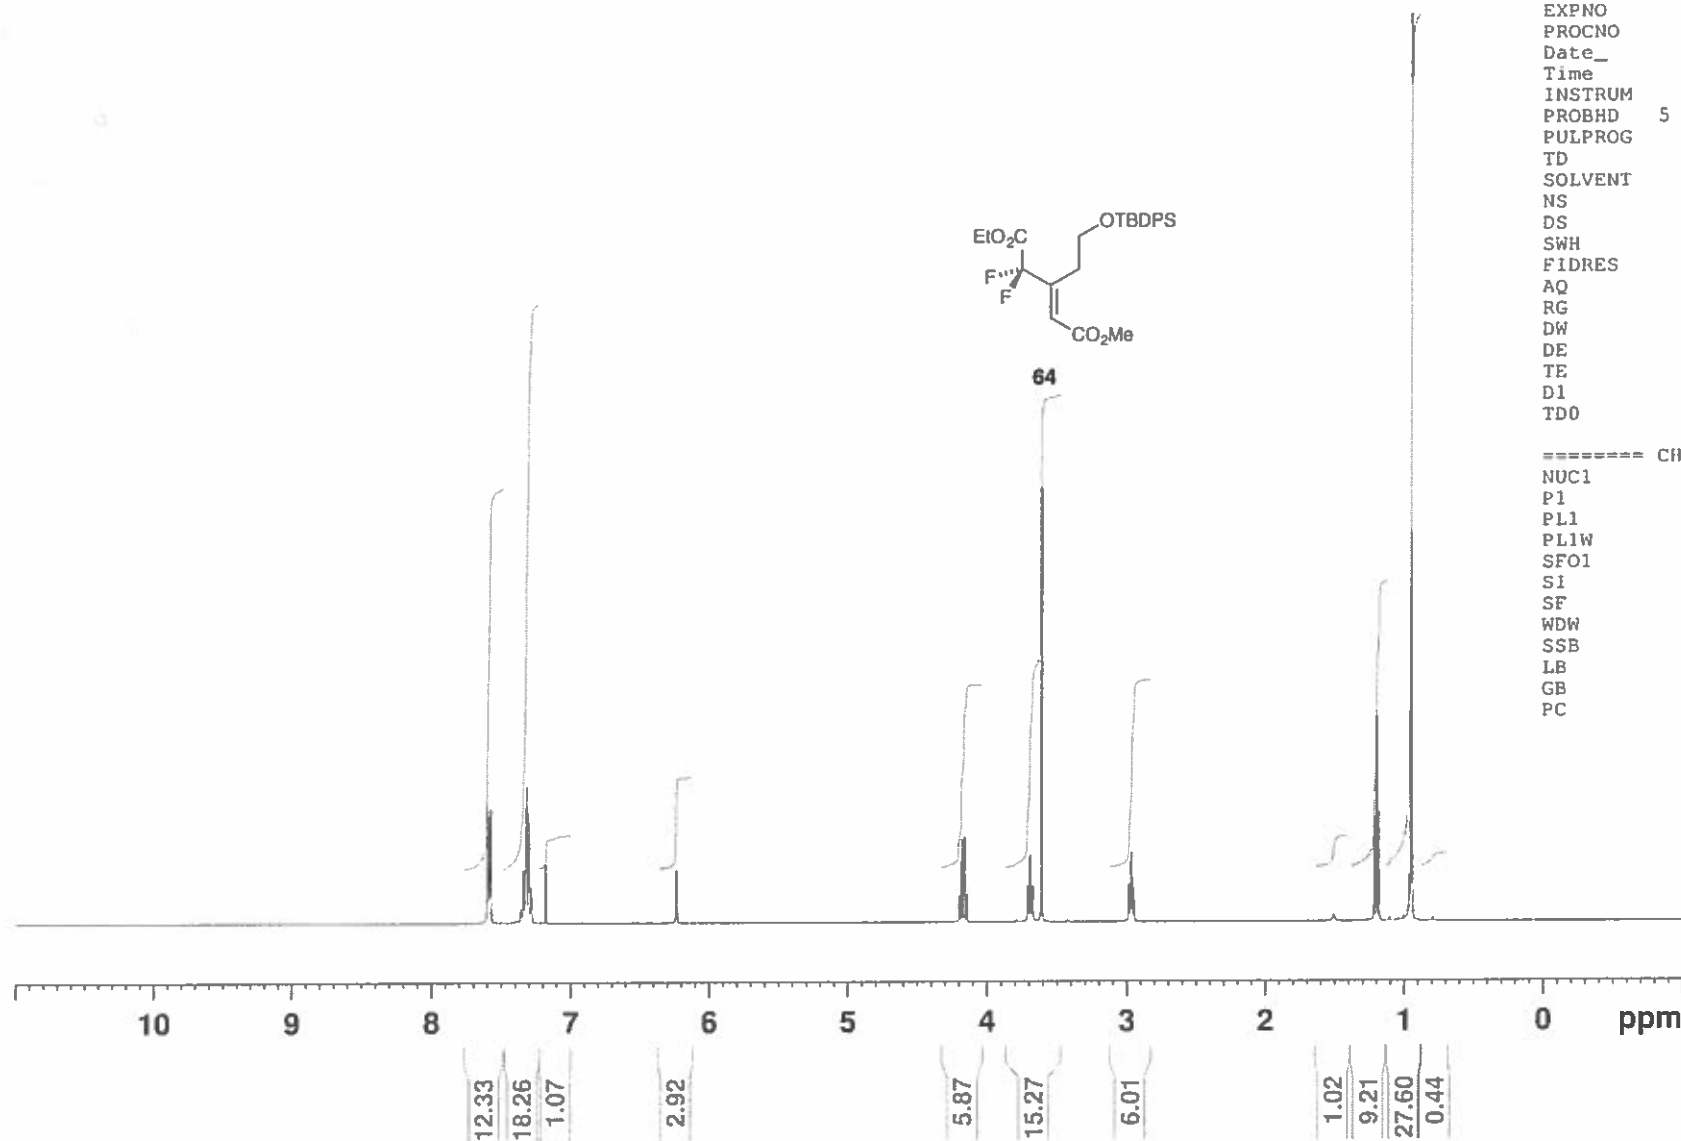

EJT-PRM147 prod data

13C NMR of compound 64 in CDCl3, Bruker 400 data 2014 Apr ejt-10

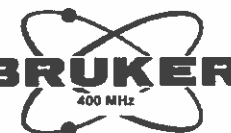

165.1  
163.1  
162.1  
146.1  
146.1  
145.1  
135.1  
135.1  
135.1  
133.1  
133.1  
133.1  
133.1  
129.1  
129.1  
129.1  
128.1  
128.1  
127.1  
127.1  
127.1  
127.1  
123.1  
123.1  
115.1  
113.1  
110.64  
77.26  
77.06  
76.74  
63.46  
62.02  
51.70  
31.96  
30.13  
29.73  
29.39  
28.67  
27.63  
26.92  
26.90  
26.75  
26.62  
26.59  
26.42  
26.33  
26.05  
25.94  
25.92  
25.89  
22.72  
19.50  
19.30  
19.16  
18.99  
18.81

Current Data Parameters  
NAME 2014-04-06-ejt-10  
EXPNO 10  
PROCNO 1

F2 - Acquisition Parameters  
Date\_ 20140406  
Time 20.53  
INSTRUM spect  
PROBHD 5 mm CPPBBO BB  
PULPROG zgpg30  
TD 65536  
SOLVENT CDC13  
NS 1024  
DS 4  
SWH 24038.461 Hz  
FIDRES 0.366798 Hz  
AQ 1.3631488 sec  
RG 45.2  
DW 20.800 usec  
DE 41.77 usec  
TE 298.0 K  
D1 2.00000000 sec  
D11 0.03000000 sec  
TD0 1

===== CHANNEL f1 =====  
SFO1 100.6077379 MHz  
NUC1 13C  
P1 10.00 usec  
PLW1 33.00000000 W

===== CHANNEL f2 =====  
SFO2 400.0716003 MHz  
NUC2 1H  
CPDPRG{2} waltz16  
PCPD2 80.00 usec  
PLW2 7.40000010 W  
PLW12 0.17209999 W  
PLW13 0.11014000 W

F2 - Processing parameters  
SI 32768  
SF 100.5976815 MHz  
WDW EM  
SSB 0  
LB 1.00 Hz  
GB 0  
PC 1.40

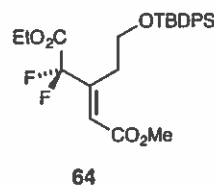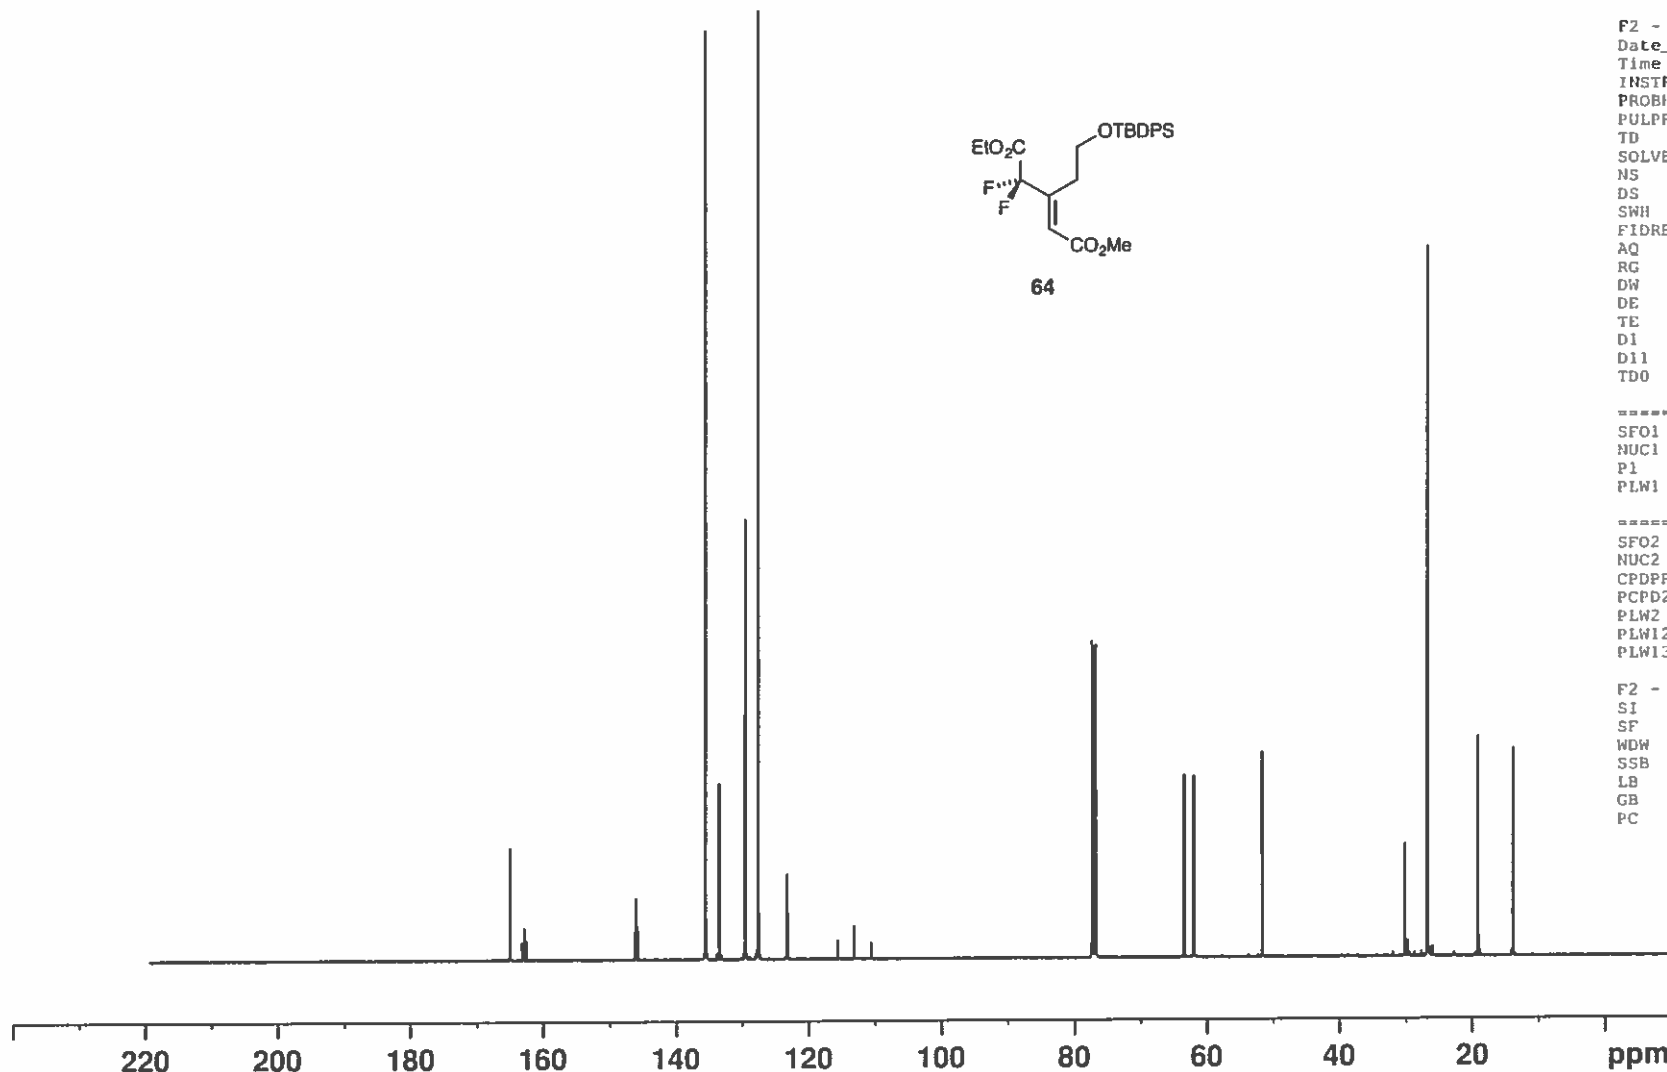

|                        |                      |                   |                                                                                                                |                        |              |                      |             |
|------------------------|----------------------|-------------------|----------------------------------------------------------------------------------------------------------------|------------------------|--------------|----------------------|-------------|
| Acquisition Time (sec) | 0.7340               | Comment           | EJT-PRM147 f17-27 31mg mF19 CDCl3 (e:\bruk400\data\2014\Apr) ejt 50                                            |                        | Date         | 05 Apr 2014 12:01:20 |             |
| Date Stamp             | 05 Apr 2014 12:01:20 | File Name         | \\ss7a.ds.man.ac.uk\vol5\VOL3\USERS\SNMRDATA\BRUK400DATA\2014\APR\DATA\EJT\NMR\2014-04-05-EJT-50\12\PDATA\1\1R |                        |              |                      |             |
| Frequency (MHz)        | 376.50               | Nucleus           | 19F                                                                                                            | Number of Transients   | 16           | Origin               | AV400       |
| Original Points Count  | 65536                | Owner             | Administrator                                                                                                  | Points Count           | 262144       | Pulse Sequence       | zg          |
| Receiver Gain          | 4100.00              | SW(cyclical) (Hz) | 89285.71                                                                                                       | Solvent                | CHLOROFORM-d | Spectrum Offset (Hz) | -37649.5977 |
| Spectrum Type          | STANDARD             | Sweep Width (Hz)  | 89285.37                                                                                                       | Temperature (degree C) | 21.700       |                      |             |

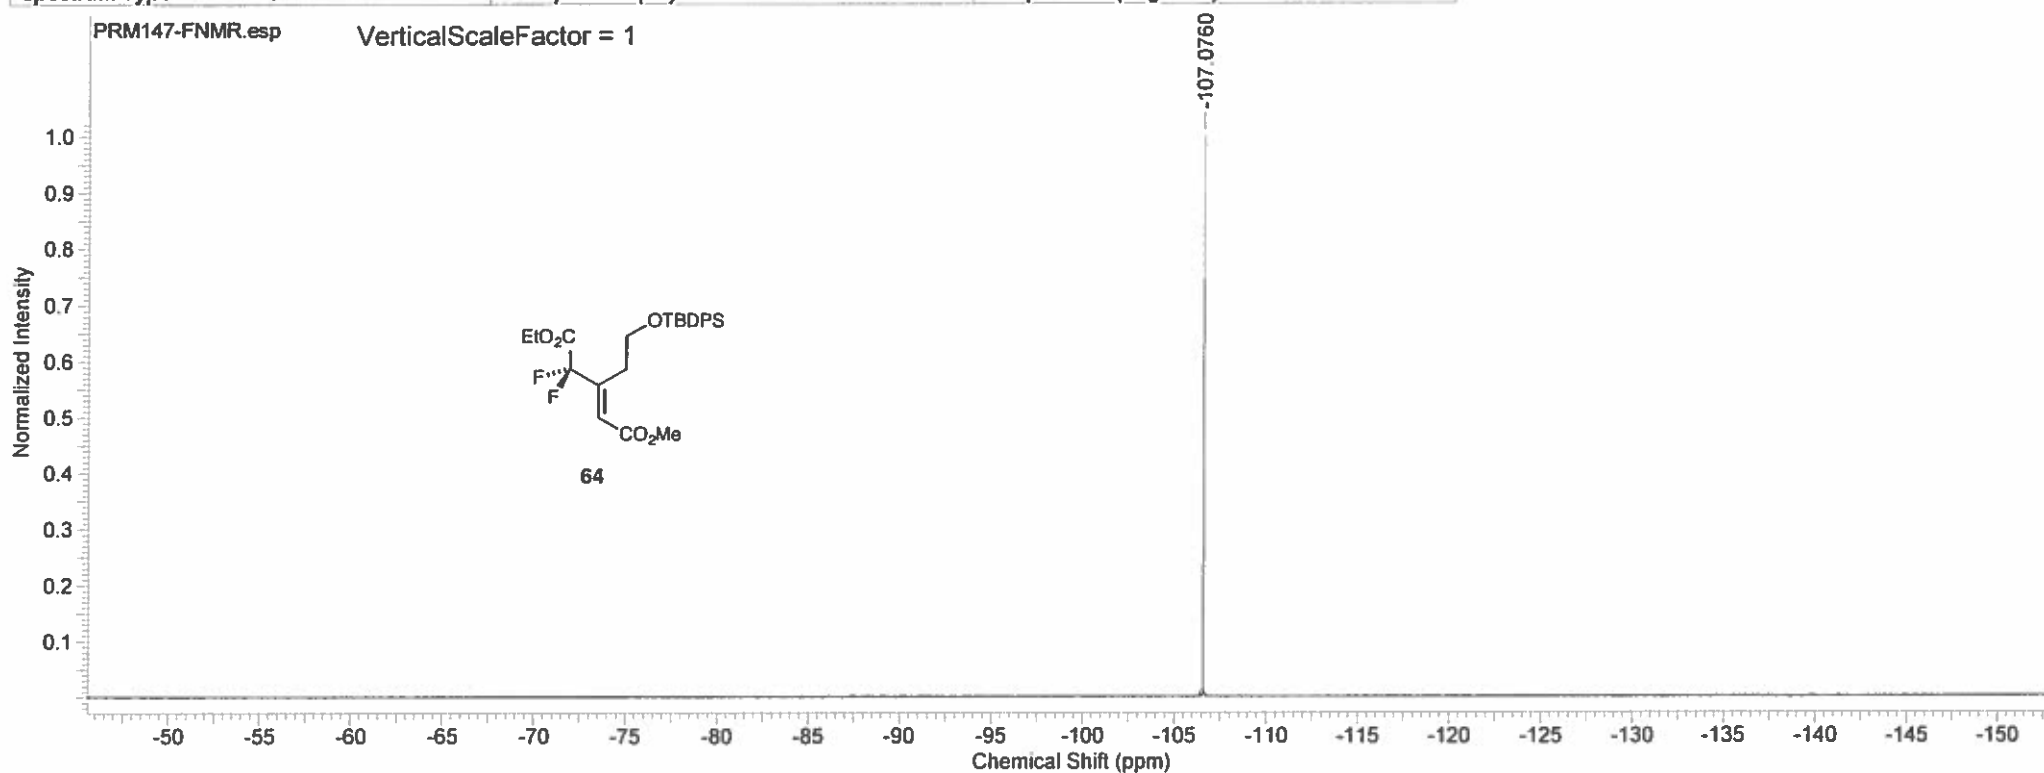

| No. | (ppm)   | (Hz)     | Height |
|-----|---------|----------|--------|
| 1   | -107.08 | -40313.9 | 1.0000 |

EJT-PRM147 f18-21 26mg  
 mPROTON CDCl3 /opt/oldbruk500data.11vii11/2014/Apr ejt 7

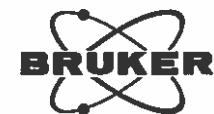

NAME 2014-04-06-ejt-7  
 EXPNO 10  
 PROCNO 1  
 Date\_ 20140406  
 Time 19.54  
 INSTRUM spect  
 PROBHD 5 mm PABBO BB-  
 PULPROG zg30b  
 TD 65536  
 SOLVENT CDCl3  
 NS 16  
 DS 0  
 SWH 10330.578 Hz  
 FIDRES 0.157632 Hz  
 AQ 3.1719923 sec  
 RG 90.5  
 DW 48.400 usec  
 DE 13.00 usec  
 TE 294.5 K  
 D1 1.00000000 sec  
 TD0 1

===== CHANNEL f1 =====  
 NUC1 1H  
 P1 10.00 usec  
 PL1 -0.10 dB  
 PL1W 26.21803665 W  
 SFO1 500.1330885 MHz  
 SI 32768  
 SF 500.1300541 MHz  
 WDW EM  
 SSB 0  
 LB 0.30 Hz  
 GB 0  
 PC 1.00

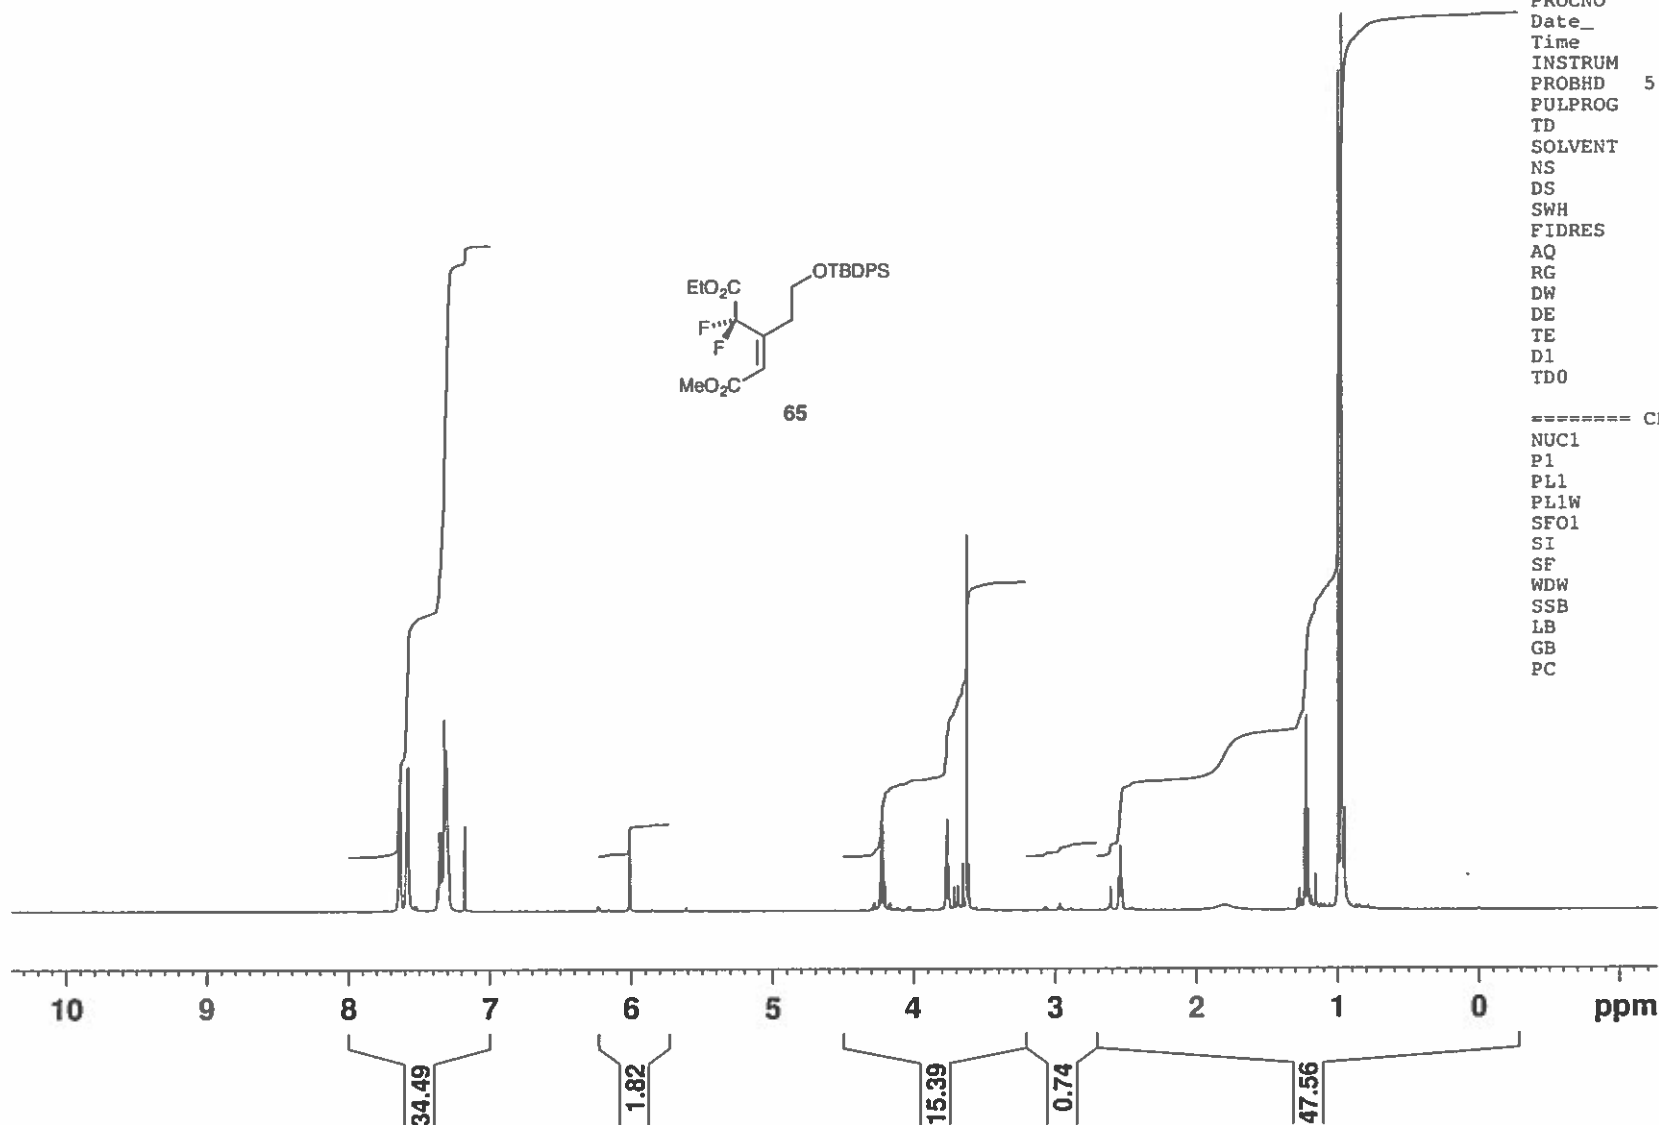

EJT-PRM147 f18-21 26mg  
m19F CDC13 /opt/oldbruk500data.11vii11/2014/Apr ejt 7

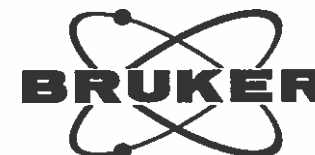

NAME 2014-04-06-ejt-7  
EXPNO 11  
PROCNO 1  
Date\_ 20140406  
Time 19.56  
INSTRUM spect  
PROBHD 5 mm PABBO BB-  
PULPROG zgfglqn  
TD 131072  
SOLVENT CDC13  
NS 16  
DS 4  
SWH 113636.367 Hz  
FIDRES 0.866977 Hz  
AQ 0.5767668 sec  
RG 406  
DW 4.400 usec  
DE 6.50 usec  
TE 300.0 K  
D1 1.00000000 sec  
TD0 1

----- CHANNEL f1 -----  
NUC1 19F  
P1 12.38 usec  
PL1 -0.10 dB  
PL1W 25.70395851 W  
SF01 470.5453180 MHz  
SI 65536  
SF 470.5923770 MHz  
WDW EM  
SSB 0  
LB 0.30 Hz  
GB 0  
PC 1.00

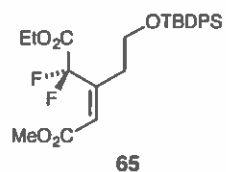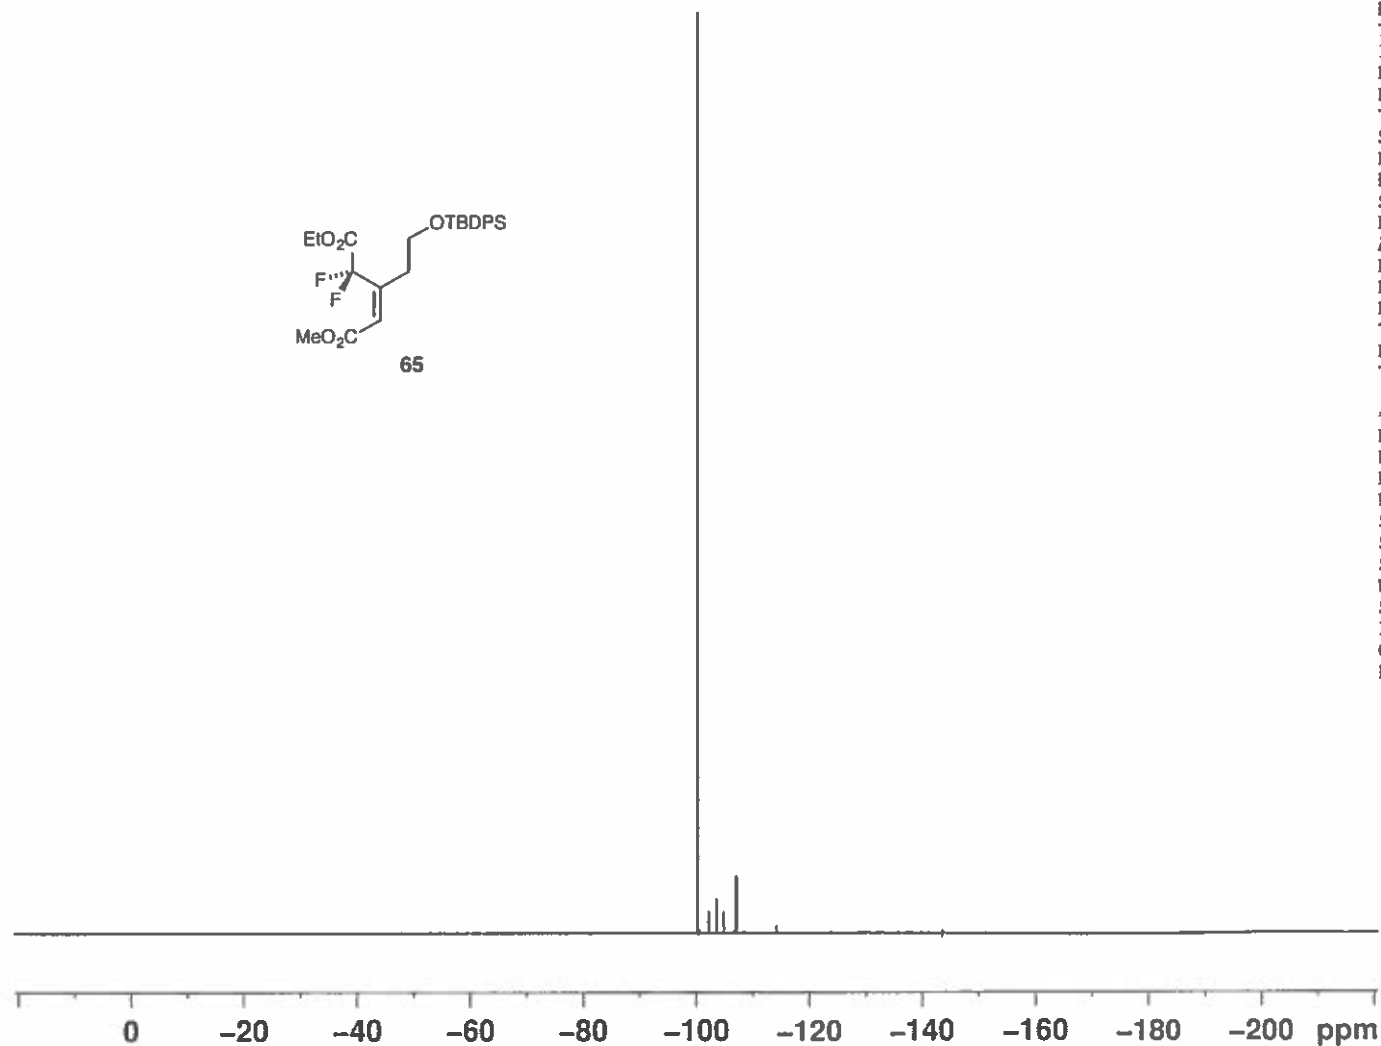



EJT-PRM149F f17-34 38mg  
mPROTON CDCl3 {e:\bruk400data\2014\May} ejt 54

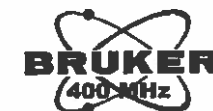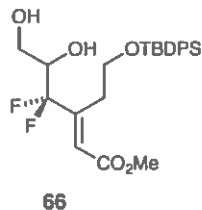

NAME 2014-05-09-ejt-54  
EXPNO 10  
PROCNO 1  
Date\_ 20140509  
Time 13.20  
INSTRUM AV400  
PROBHD 5 mm PABBO BB-  
PULPROG zg30b  
TD 65536  
SOLVENT CDCl3  
NS 16  
DS 0  
SWH 8264.463 Hz  
FIDRES 0.126106 Hz  
AQ 3.9649780 sec  
RG 128  
DW 60.500 usec  
DE 8.45 usec  
TE 295.0 K  
D1 1.00000000 sec  
TD0 1

===== CHANNEL f1 =====  
NUC1 1H  
P1 14.50 usec  
PL1 -3.60 dB  
PL1W 17.83863831 W  
SFO1 400.1324710 MHz  
SI 32768  
SF 400.1300407 MHz  
WDW EM  
SSB 0  
LB 0.30 Hz  
GB 0  
PC 1.00

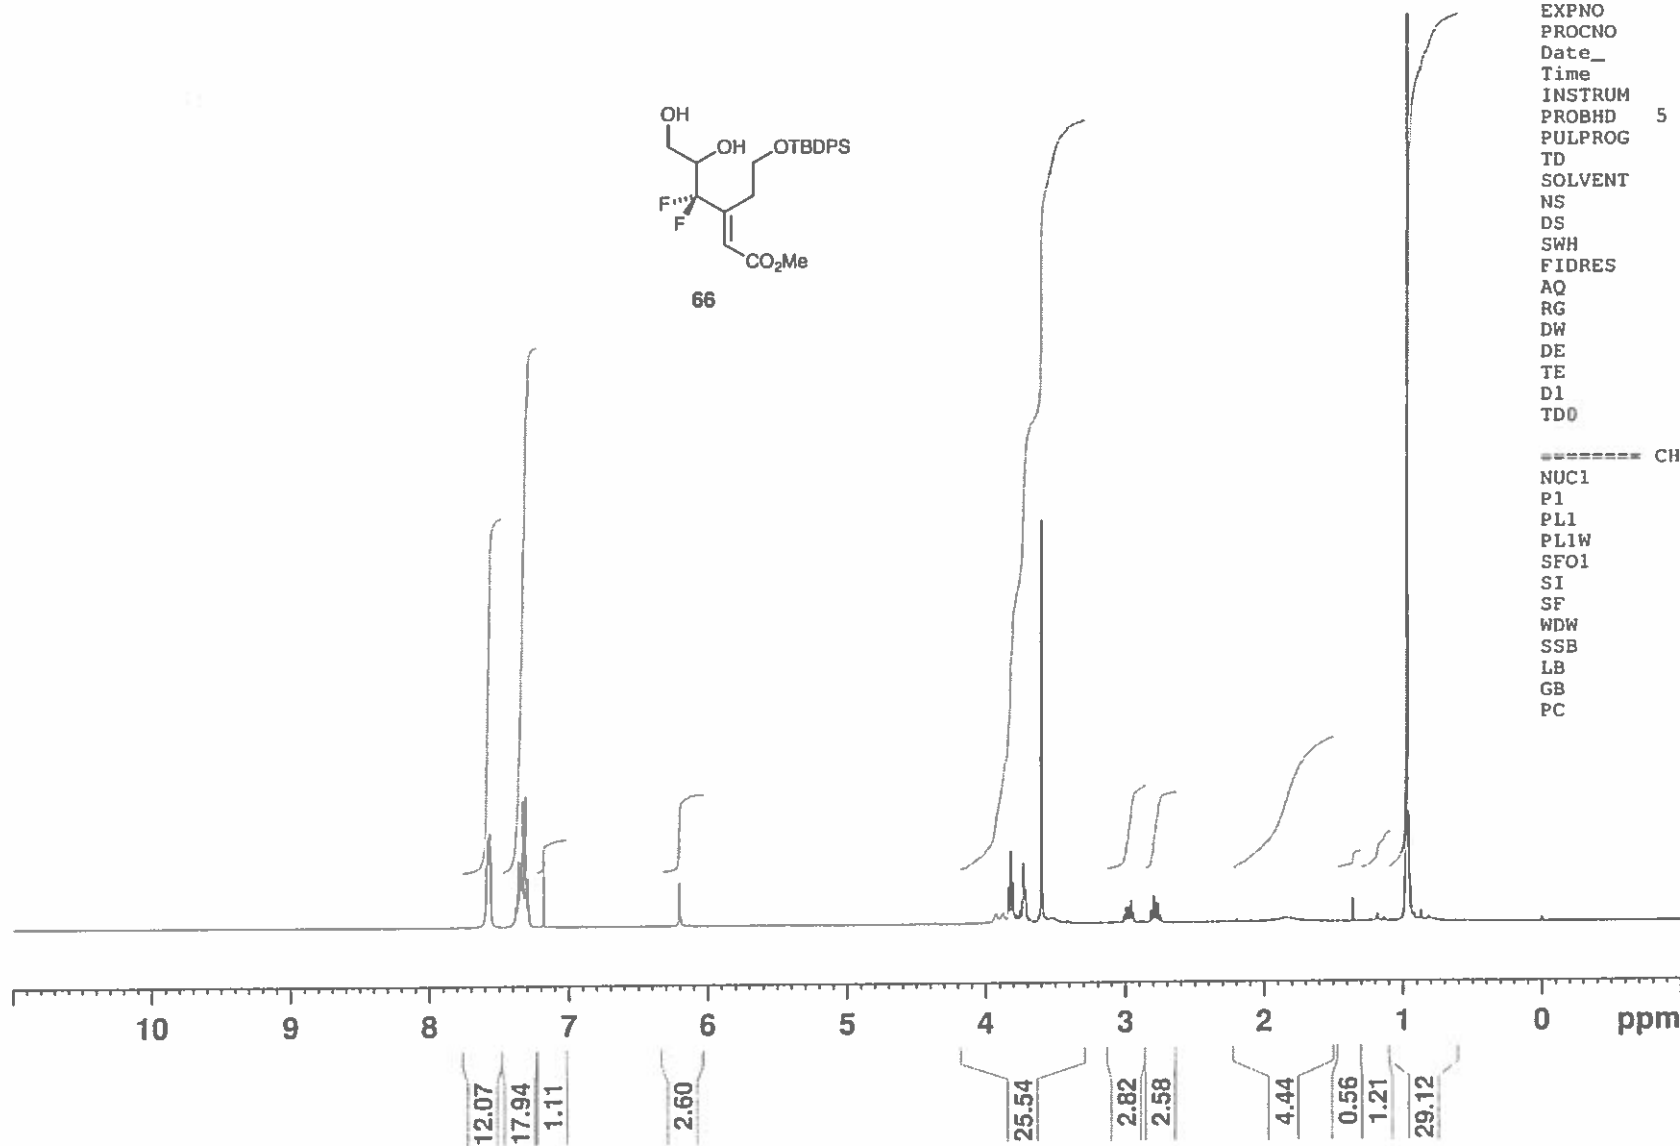

EJT-PRM149 Prod data

mCARBON\_B CDCl3 (e:\bruker\data\2014\May\ejt-24)

165.149.149.148.135.135.132.130.130.129.128.127.123.122.122.122.120.120.118.118.77.77.77.76.72.71.71.71.63.60.60.51.30.29.29.26.26.25.19.19.18.

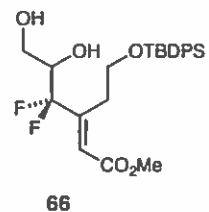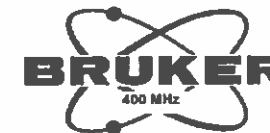

Current Data Parameters  
NAME 2014-05-12-ejt-24  
EXPNO 10  
PROCNO 1

F2 - Acquisition Parameters  
Date\_ 20140513  
Time 22.51  
INSTRUM spect  
PROBHD 5 mm CPPBBO BB  
PULPROG zgpg30  
TD 65536  
SOLVENT CDCl3  
NS 1024  
DS 4  
SWH 24038.461 Hz  
FIDRES 0.366798 Hz  
AQ 1.3631488 sec  
RG 71.8  
DW 20.800 usec  
DE 41.77 usec  
TE 295.0 K  
D1 2.00000000 sec  
D11 0.03000000 sec  
TD0 1

----- CHANNEL f1 -----  
SFO1 100.6077379 MHz  
NUC1 13C  
P1 10.00 usec  
PLW1 33.00000000 W

----- CHANNEL f2 -----  
SFO2 400.0716003 MHz  
NUC2 1H  
CPDPRG12 waltz16  
PCPD2 80.00 usec  
PLW2 7.40000010 W  
PLW12 0.17209999 W  
PLW13 0.11014000 W

F2 - Processing parameters  
SI 32768  
SF 100.5976815 MHz  
WDW EM  
SSB 0  
LB 1.00 Hz  
GB 0  
PC 1.40

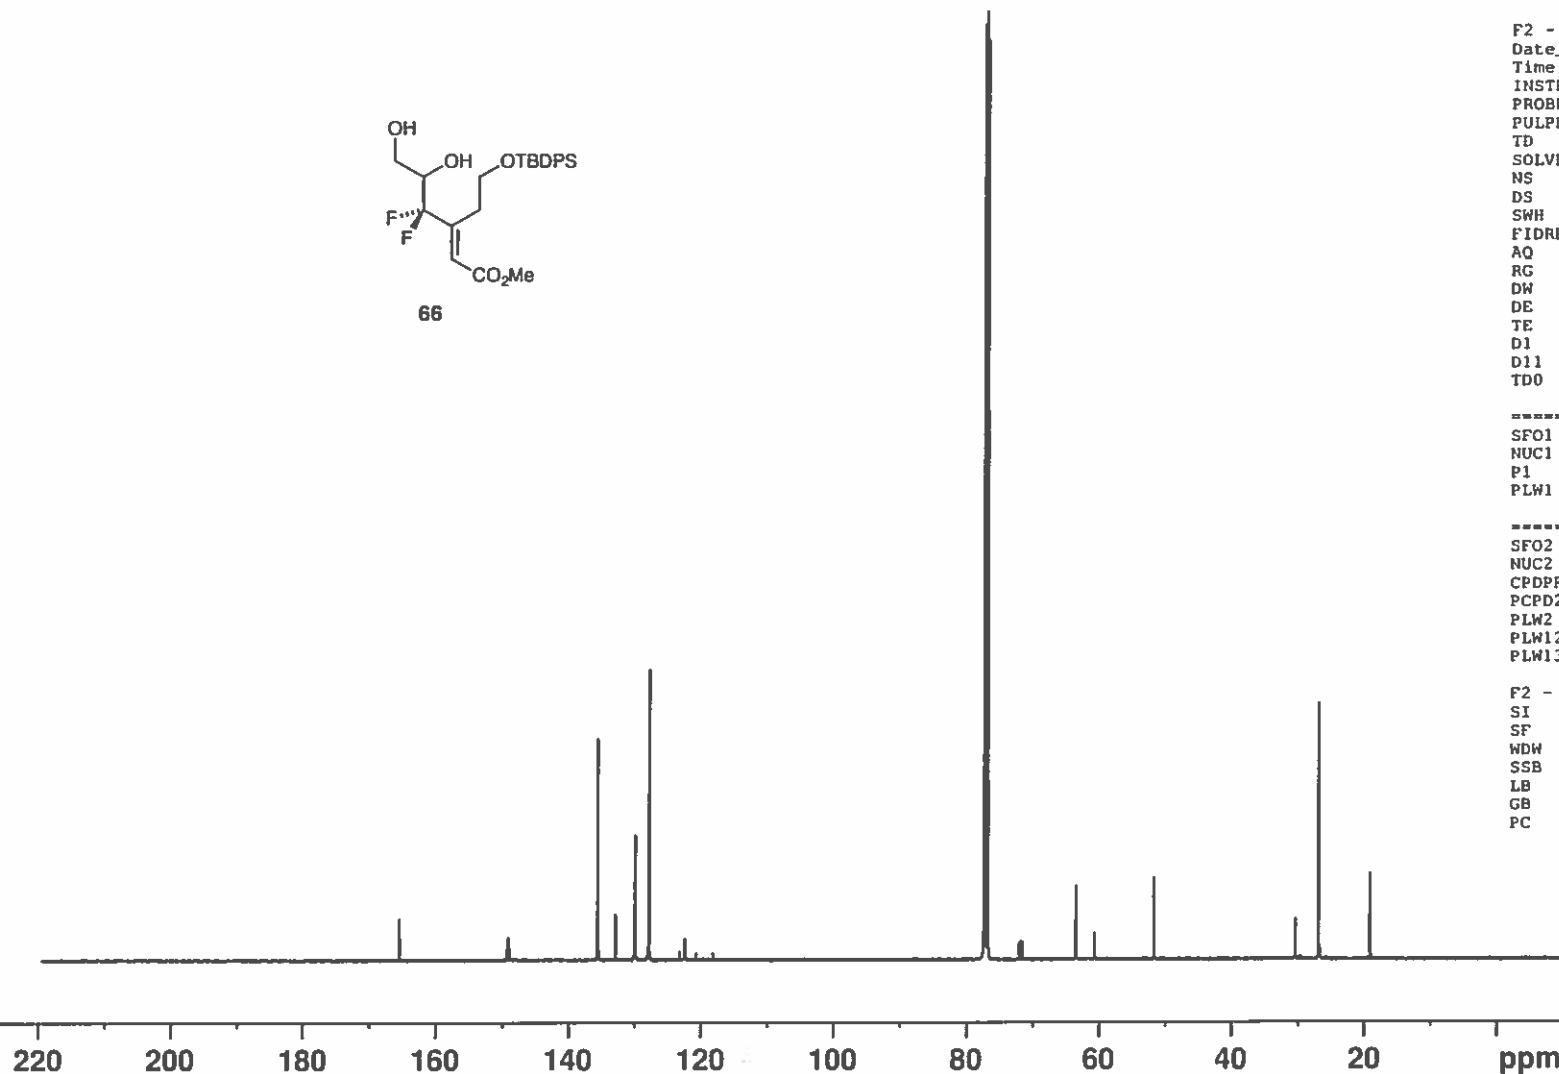

|                        |                                                                                                                |                   |                                                                       |                        |              |                      |             |
|------------------------|----------------------------------------------------------------------------------------------------------------|-------------------|-----------------------------------------------------------------------|------------------------|--------------|----------------------|-------------|
| Acquisition Time (sec) | 0.7340                                                                                                         | Comment           | EJT-PRM149F f17-34 38mg mF19CPD CDCl3 (e:\bruk400data\2014May) ejt 54 |                        |              |                      |             |
| Date                   | 09 May 2014 13:22:24                                                                                           | Date Stamp        | 09 May 2014 13:22:24                                                  |                        |              |                      |             |
| File Name              | \\ss7a.ds.man.ac.uk\vol5\VOL3\USERS\SNMRDATA\BRUK400DATA\2014MAY\DATA\EJT\NMR\2014-05-09-EJT-54\111\PDATA\111R |                   |                                                                       |                        |              |                      |             |
| Frequency (MHz)        | 376.50                                                                                                         | Nucleus           | 19F                                                                   | Number of Transients   | 16           | Origin               | AV400       |
| Original Points Count  | 65536                                                                                                          | Owner             | Administrator                                                         | Points Count           | 262144       | Pulse Sequence       | zgig        |
| Receiver Gain          | 4100.00                                                                                                        | SW(cyclical) (Hz) | 89285.71                                                              | Solvent                | CHLOROFORM-d | Spectrum Offset (Hz) | -37649.5977 |
| Spectrum Type          | STANDARD                                                                                                       | Sweep Width (Hz)  | 89285.37                                                              | Temperature (degree C) | 22.200       |                      |             |

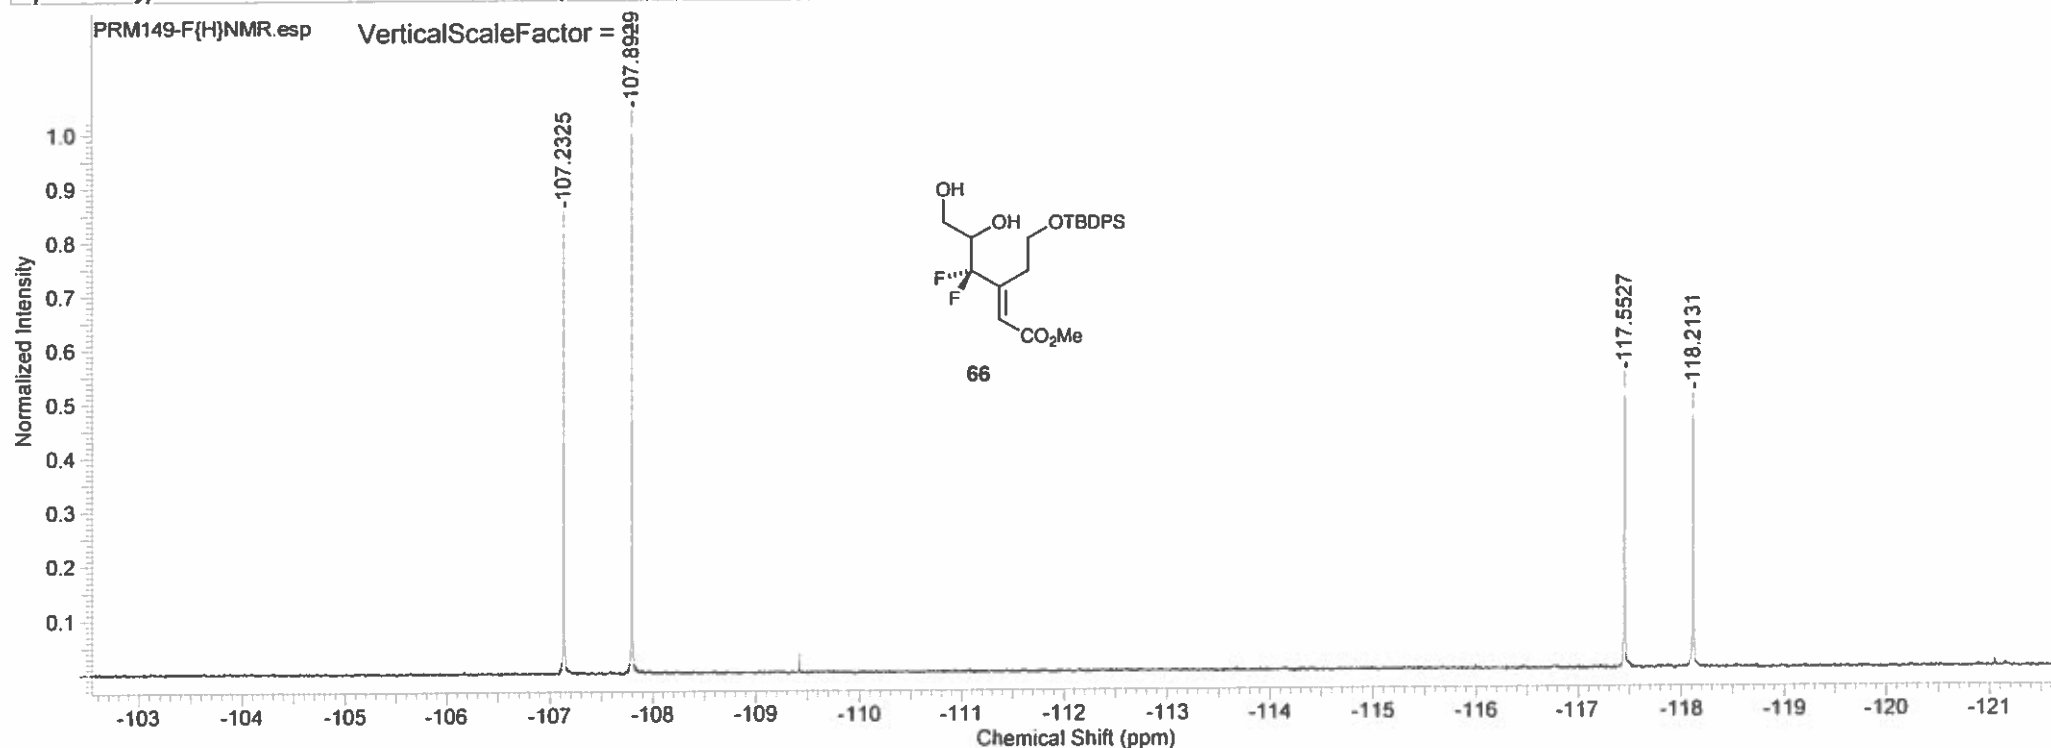

| No. | (ppm)   | (Hz)     | Height |
|-----|---------|----------|--------|
| 1   | -118.21 | -44507.0 | 0.4667 |
| 2   | -117.55 | -44258.4 | 0.5046 |
| 3   | -107.89 | -40621.5 | 1.0000 |
| 4   | -107.23 | -40372.8 | 0.8148 |

EJT-PRM150 Zn allylation f5-15 20mg  
 mPROTON CDCl3 {e:\bruk400data\2014\May} ejt 11

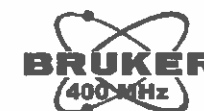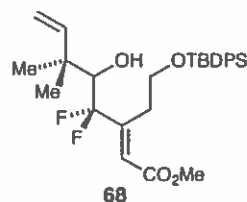

NAME 2014-05-16-ejt-11  
 EXPNO 10  
 PROCNO 1  
 Date\_ 20140516  
 Time 15.29  
 INSTRUM AV400  
 PROBHD 5 mm PABBO BB-  
 PULPROG zg30b  
 TD 65536  
 SOLVENT CDCl3  
 NS 16  
 DS 0  
 SWH 8264.463 Hz  
 FIDRES 0.126106 Hz  
 AQ 3.9649780 sec  
 RG 144  
 DW 60.500 usec  
 DE 8.45 usec  
 TE 295.0 K  
 D1 1.00000000 sec  
 TD0 1

===== CHANNEL f1 =====  
 NUC1 1H  
 P1 14.50 usec  
 PL1 -3.60 dB  
 PL1W 17.83863831 W  
 SFO1 400.1324710 MHz  
 S1 32768  
 SF 400.1300394 MHz  
 WDW EM  
 SSB 0  
 LB 0.30 Hz  
 GB 0  
 PC 1.00

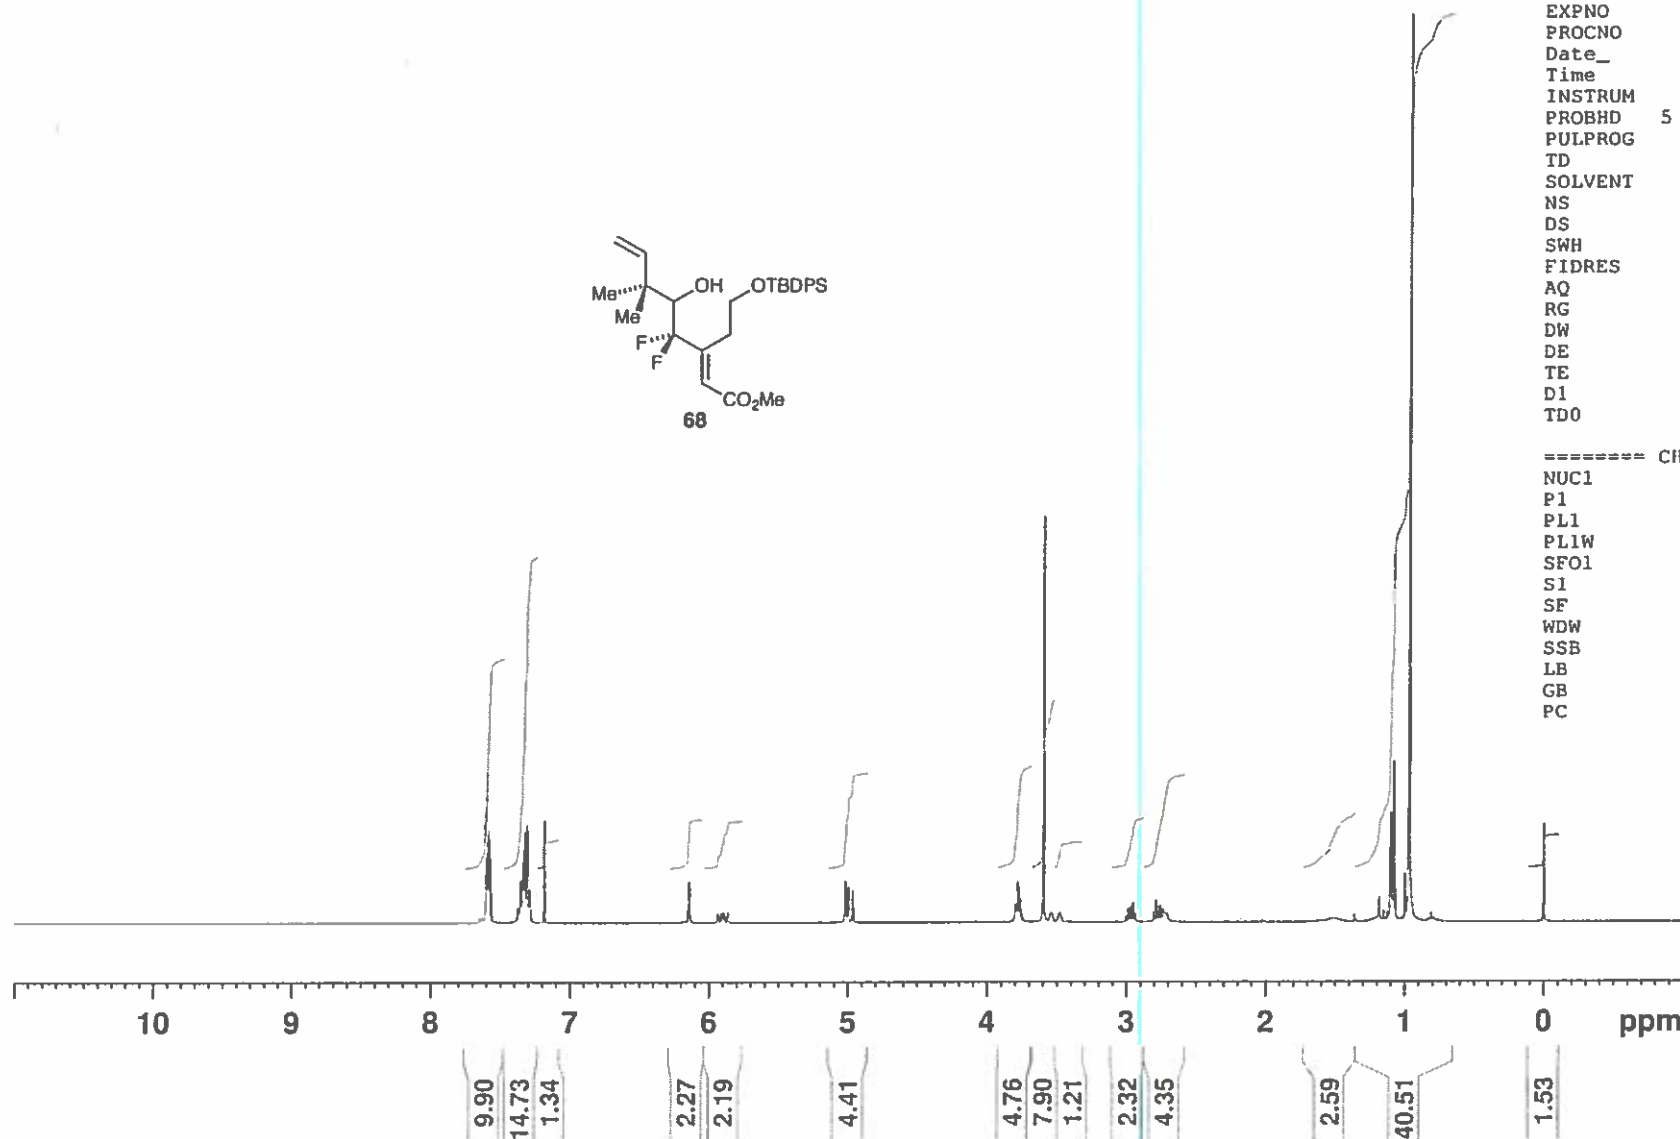

|                        |                                                                                                             |                        |                                                                                    |                      |            |
|------------------------|-------------------------------------------------------------------------------------------------------------|------------------------|------------------------------------------------------------------------------------|----------------------|------------|
| Acquisition Time (sec) | 1.1010                                                                                                      | Comment                | P. Mears EJ-PRM150 Prod 0514-049 mCARBON CDCl3 {E:\bruk500cdata\2014\May} staff 17 |                      |            |
| Date                   | 21 May 2014 15:30:24                                                                                        | Date Stamp             | 21 May 2014 15:30:24                                                               |                      |            |
| File Name              | \\ss7a.ds.man.ac.uk\vol5\vol3\users\snmrdata\bruk500cdata\2014\May\data\staff\nmr\2014-05-21-staff-17\12Vid |                        |                                                                                    | Frequency (MHz)      | 125.77     |
| Nucleus                | 13C                                                                                                         | Number of Transients   | 2048                                                                               | Origin               | spect      |
| Owner                  | nmrsu                                                                                                       | Points Count           | 32768                                                                              | Pulse Sequence       | zgpg30     |
| SW(cyclical) (Hz)      | 29761.90                                                                                                    | Solvent                | CHLOROFORM-d                                                                       | Receiver Gain        | 184.40     |
| Sweep Width (Hz)       | 29761.00                                                                                                    | Temperature (degree C) | 22.160                                                                             | Spectrum Offset (Hz) | 12568.6943 |
|                        |                                                                                                             |                        |                                                                                    | Spectrum Type        | STANDARD   |

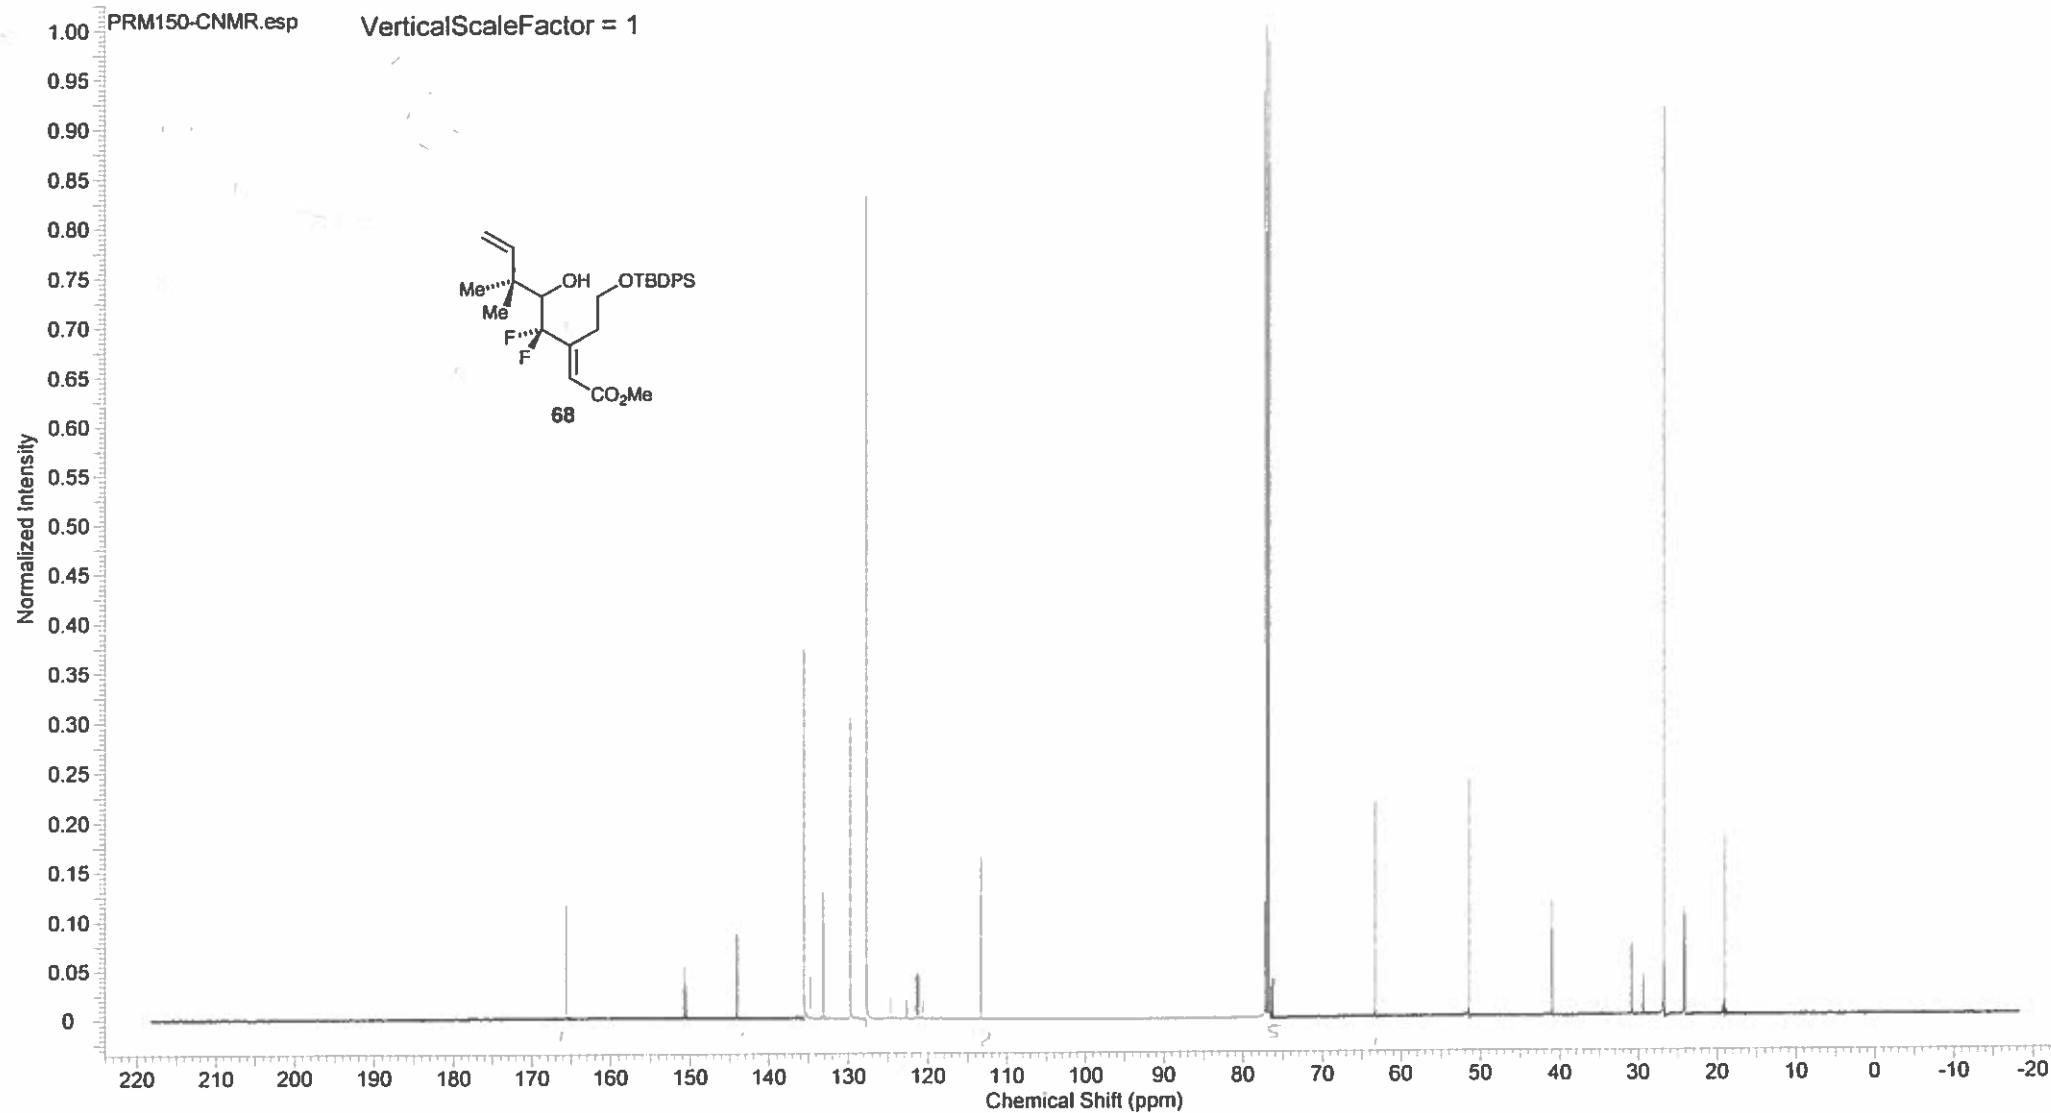

|                               |                                                                                                                |                          |                                                                                    |                               |              |
|-------------------------------|----------------------------------------------------------------------------------------------------------------|--------------------------|------------------------------------------------------------------------------------|-------------------------------|--------------|
| <b>Acquisition Time (sec)</b> | 0.7340                                                                                                         | <b>Comment</b>           | EJT-PRM150 Zn allylation f5-15 20mg mF19CPD CDCI3 (e:\bruk400data\2014\May) ejt 11 |                               |              |
| <b>Date</b>                   | 16 May 2014 15:30:24                                                                                           | <b>Date Stamp</b>        | 16 May 2014 15:30:24                                                               |                               |              |
| <b>File Name</b>              | \\ss7a.ds.man.ac.uk\vol5\VOL3\USERS\SNMRDATA\BRUK400DATA\2014\MAY\DATA\EJT\NMR\2014-05-16-EJT-11\1\1\PDAT\1\1R |                          |                                                                                    |                               |              |
| <b>Frequency (MHz)</b>        | 376.50                                                                                                         | <b>Nucleus</b>           | 19F                                                                                | <b>Number of Transients</b>   | 16           |
| <b>Original Points Count</b>  | 65536                                                                                                          | <b>Owner</b>             | Administrator                                                                      | <b>Points Count</b>           | 262144       |
| <b>Receiver Gain</b>          | 4100.00                                                                                                        | <b>SW(cyclical) (Hz)</b> | 89285.71                                                                           | <b>Solvent</b>                | CHLOROFORM-d |
| <b>Spectrum Type</b>          | STANDARD                                                                                                       | <b>Sweep Width (Hz)</b>  | 89285.37                                                                           | <b>Temperature (degree C)</b> | 22.200       |
|                               |                                                                                                                |                          |                                                                                    | <b>Origin</b>                 | AV400        |
|                               |                                                                                                                |                          |                                                                                    | <b>Pulse Sequence</b>         | zgig         |
|                               |                                                                                                                |                          |                                                                                    | <b>Spectrum Offset (Hz)</b>   | -37649.5977  |

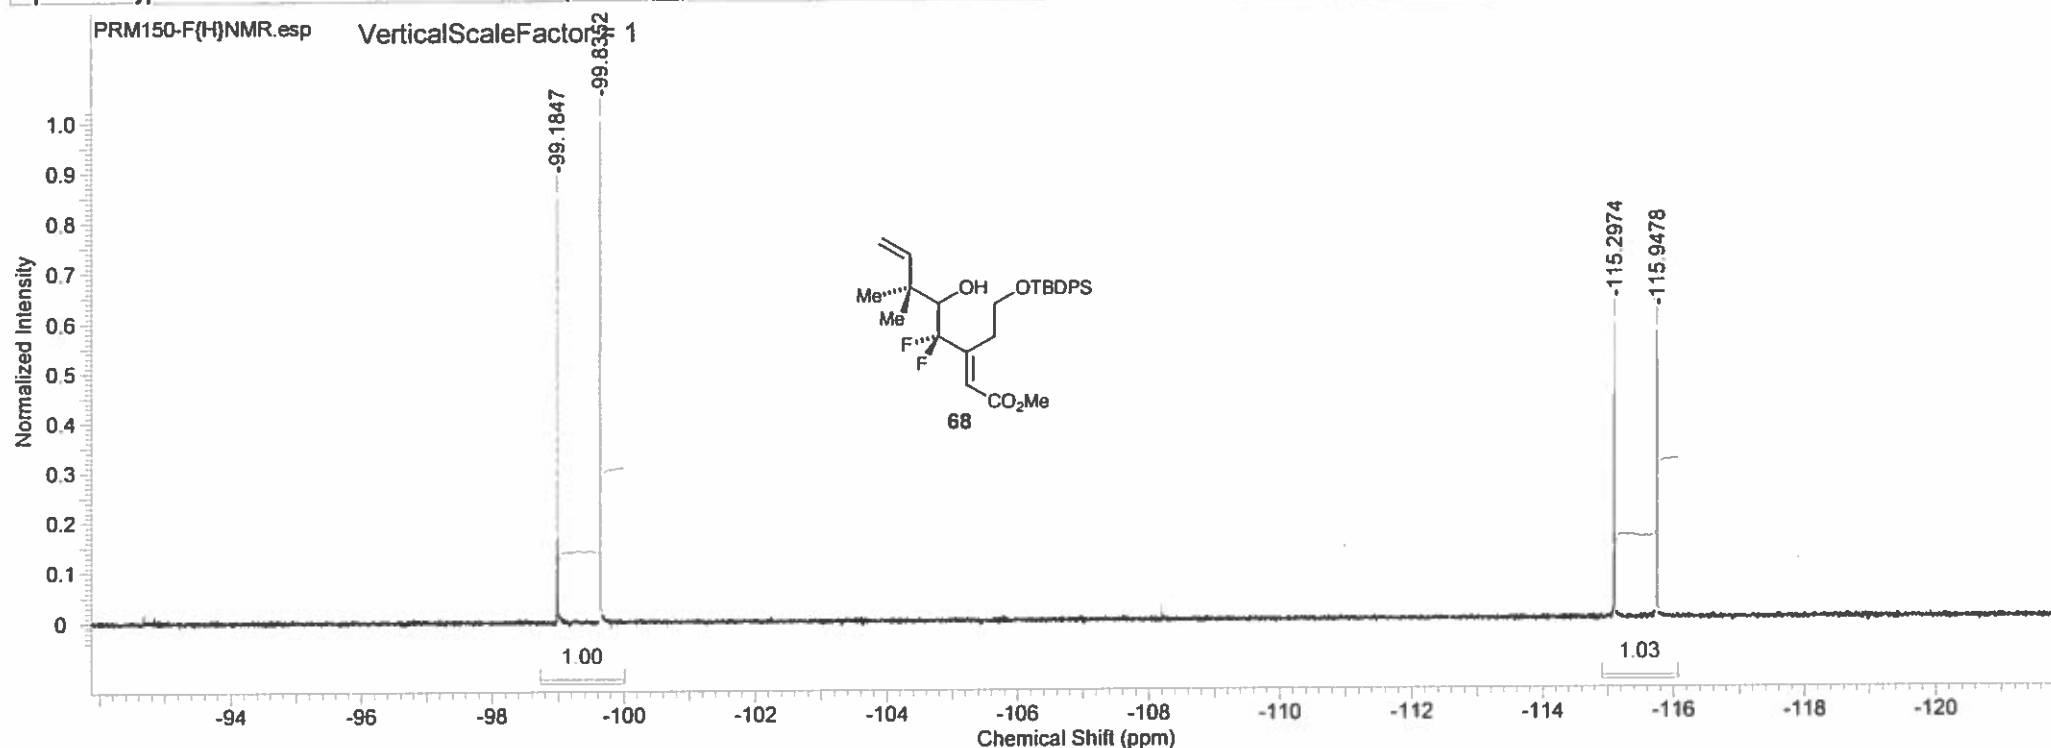

| No. | (ppm)    | Value          | Absolute Value | Non-Negative Value |
|-----|----------|----------------|----------------|--------------------|
| 1   | 2702 ... | -1151.03150678 | 1.04263719e+6  | 1.03150678         |
| 2   | 2075 ..  | -98.0.99985164 | 1.01064050e+6  | 0.99985164         |

EJT-PRM151 f4-12 11mg  
mPROTON CDCl3 {E:\bruk500adata\2014\May} ejt 7

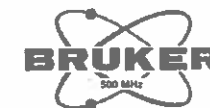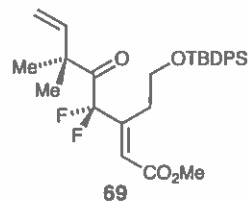

Current Data Parameters  
NAME 2014-05-17-ejt-7  
EXPNO 20  
PROCNO 1

F2 - Acquisition Parameters  
Date\_ 20140517  
Time 15.18  
INSTRUM spect  
PROBHD 5 mm PABBO BB-  
PULPROG zg30  
TD 65536  
SOLVENT CDCl3  
NS 16  
DS 0  
SWH 10330.578 Hz  
FIDRES 0.157632 Hz  
AQ 3.1719425 sec  
RG 144  
DW 48.400 usec  
DE 13.00 usec  
TE 293.0 K  
D1 1.00000000 sec  
TD0 1

===== CHANNEL f1 =====  
SF01 500.1330885 MHz  
NUC1 1H  
P1 10.00 usec  
PLW1 26.21800041 W

F2 - Processing parameters  
SI 32768  
SF 500.1300481 MHz  
WDW EM  
SSB 0  
LB 0.30 Hz  
GB 0  
PC 1.00

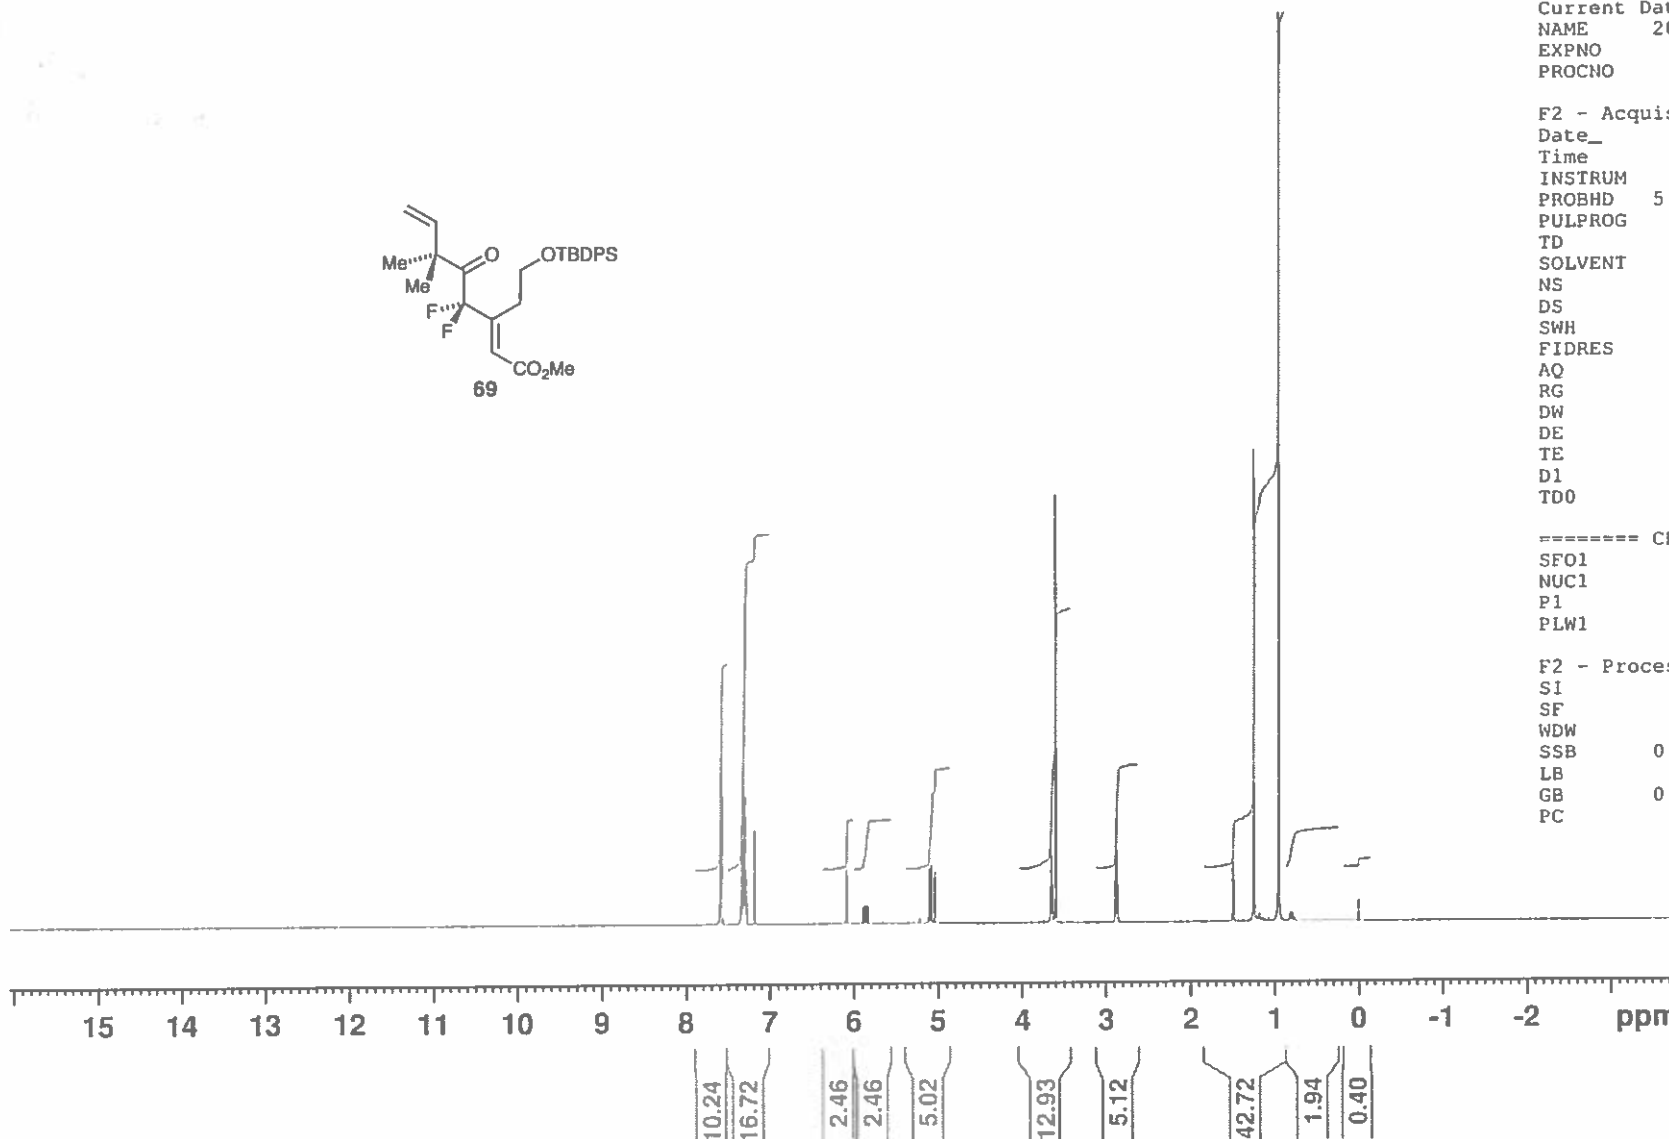

P. Mears  
 EJT151 prod data  
 0614-017  
 2048 scans  
 mCARBON CDC13 {E:\bruk500cdata\2014\Jun} staff 16

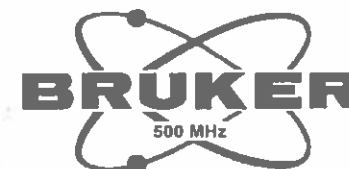

Current Data Parameters  
 NAME 2014-06-11-staff-16  
 EXPNO 10  
 PROCNO 1

F2 - Acquisition Parameters  
 Date\_ 20140611  
 Time\_ 15.58  
 INSTRUM spect  
 PROBHD 5 mm CPPBBO BB  
 PULPROG zgpg30  
 TD 65536  
 SOLVENT CDC13  
 NS 2048  
 DS 4  
 SWH 29761.904 Hz  
 FIDRES 0.454131 Hz  
 AQ 1.1010048 sec  
 RG 184.4  
 DW 16.800 usec  
 DE 102.82 usec  
 TE 298.2 K  
 D1 2.00000000 sec  
 D11 0.03000000 sec  
 TD0 1

===== CHANNEL f1 =====  
 SFO1 125.7854504 MHz  
 NUC1 13C  
 P1 10.00 usec  
 PLW1 53.59999847 W

===== CHANNEL f2 =====  
 SFO2 500.1920008 MHz  
 NUC2 1H  
 CPDPRG[2] waltz16  
 PCPD2 80.00 usec  
 PLW2 16.00000000 W  
 PLW12 0.28622001 W  
 PLW13 0.18318000 W

F2 - Processing parameters  
 SI 32768  
 SF 125.7728760 MHz  
 WDW EM  
 SSB 0  
 LB 1.00 Hz  
 GB 0  
 PC 1.40

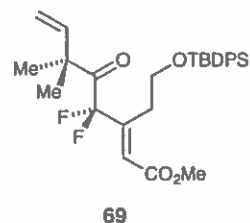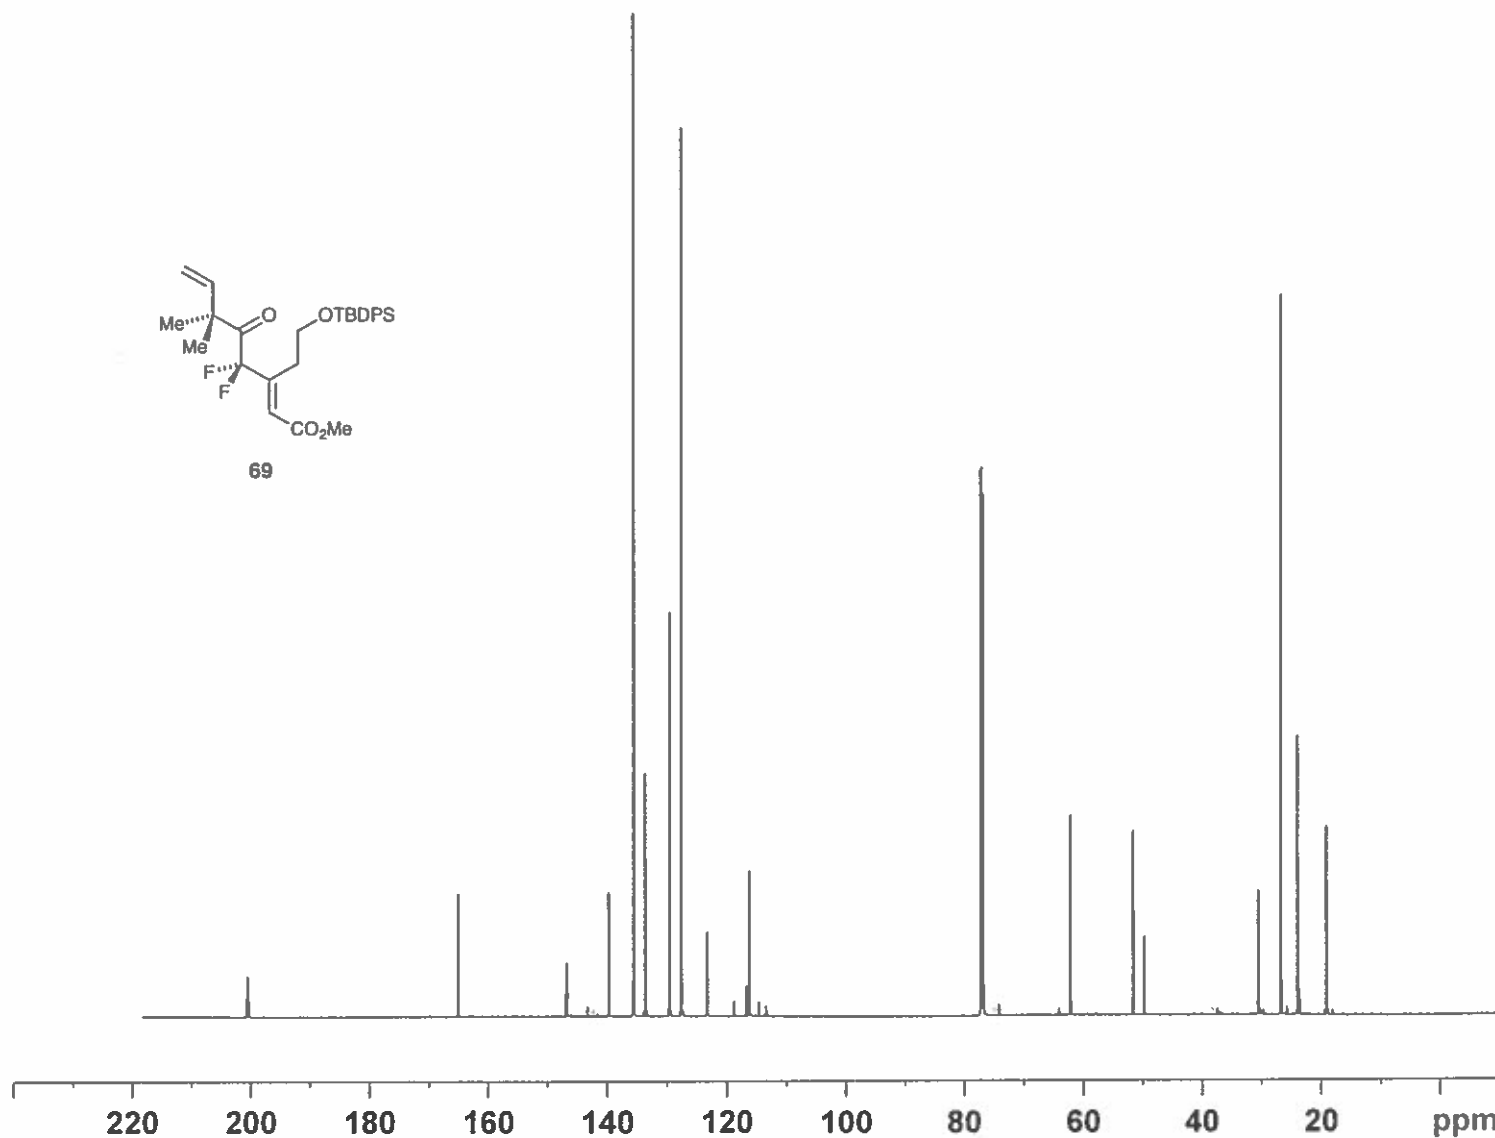



This report was created by ACD/NMR Processor Academic Edition. For more information go to [www.acdlabs.com/nmrproc/](http://www.acdlabs.com/nmrproc/)

This report was created by ACD/NMR Processor Academic Edition. For more information go to [www.acdlabs.com/nmr/proc/](http://www.acdlabs.com/nmr/proc/)

|                        |                                                                                                        |                        |                                                                  |                      |             |                       |        |
|------------------------|--------------------------------------------------------------------------------------------------------|------------------------|------------------------------------------------------------------|----------------------|-------------|-----------------------|--------|
| Acquisition Time (sec) | 0.5767                                                                                                 | Comment                | EJT-PRM151 f4-12 11mg m19F CDCl3 (E:\bruk500adata\2014May) ejl 7 |                      |             |                       |        |
| Date                   | 17 May 2014 15:21:52                                                                                   | Date Stamp             | 17 May 2014 15:21:52                                             |                      |             |                       |        |
| File Name              | \\ss7a.ds.man.ac.uk\vol5\vol3\users\snmrdata\bruk500adata\2014May\data\ejl\nmr\2014-05-17-ejt-7\22\fid |                        |                                                                  |                      |             |                       |        |
| Nucleus                | 19F                                                                                                    | Number of Transients   | 16                                                               | Origin               | spect       | Frequency (MHz)       | 470.59 |
| Owner                  | nmsu                                                                                                   | Points Count           | 65536                                                            | Pulse Sequence       | zgfgn       | Original Points Count | 65536  |
| SW(cyclical) (Hz)      | 113636.37                                                                                              | Solvent                | CHLOROFORM-d                                                     | Spectrum Offset (Hz) | -47059.0234 | Receiver Gain         | 362.00 |
| Sweep Width (Hz)       | 113634.63                                                                                              | Temperature (degree C) | 20.000                                                           | Spectrum Type        | STANDARD    |                       |        |

PRM151-FNMR.esp

VerticalScaleFactor =

-102.0393

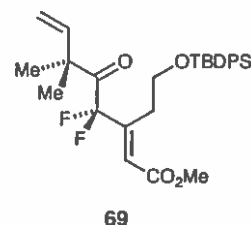

-86 -88 -90 -92 -94 -96 -98 -100 -102 -104 -106 -108 -110 -112 -114 -116 -118 -120 -122 -124 -126 -128 -130 -132 -134 -136 -138  
Chemical Shift (ppm)

EJT-PRM152 HF.py f3-11 15mg  
mPROTON C6D6 {e:\bruk400data\2014\May} ejt 2

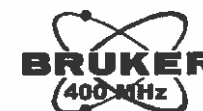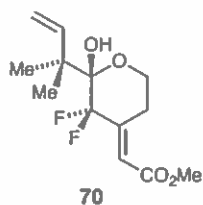

NAME 2014-05-23-ejt-2  
EXPNO 10  
PROCNO 1  
Date\_ 20140523  
Time 12.12  
INSTRUM AV400  
PROBHD 5 mm PABBO BB-  
PULPROG zg30b  
TD 65536  
SOLVENT C6D6  
NS 16  
DS 0  
SWH 8264.463 Hz  
FIDRES 0.126106 Hz  
AQ 3.9649780 sec  
RG 144  
DW 60.500 usec  
DE 8.45 usec  
TE 295.1 K  
D1 1.00000000 sec  
TD0 1

===== CHANNEL f1 =====  
NUC1 1H  
P1 14.50 usec  
PL1 -3.60 dB  
PL1W 17.83863831 W  
SFO1 400.1324710 MHz  
SI 32768  
SF 400.1300000 MHz  
WDW EM  
SSB 0  
LB 0.30 Hz  
GB 0  
PC 1.00

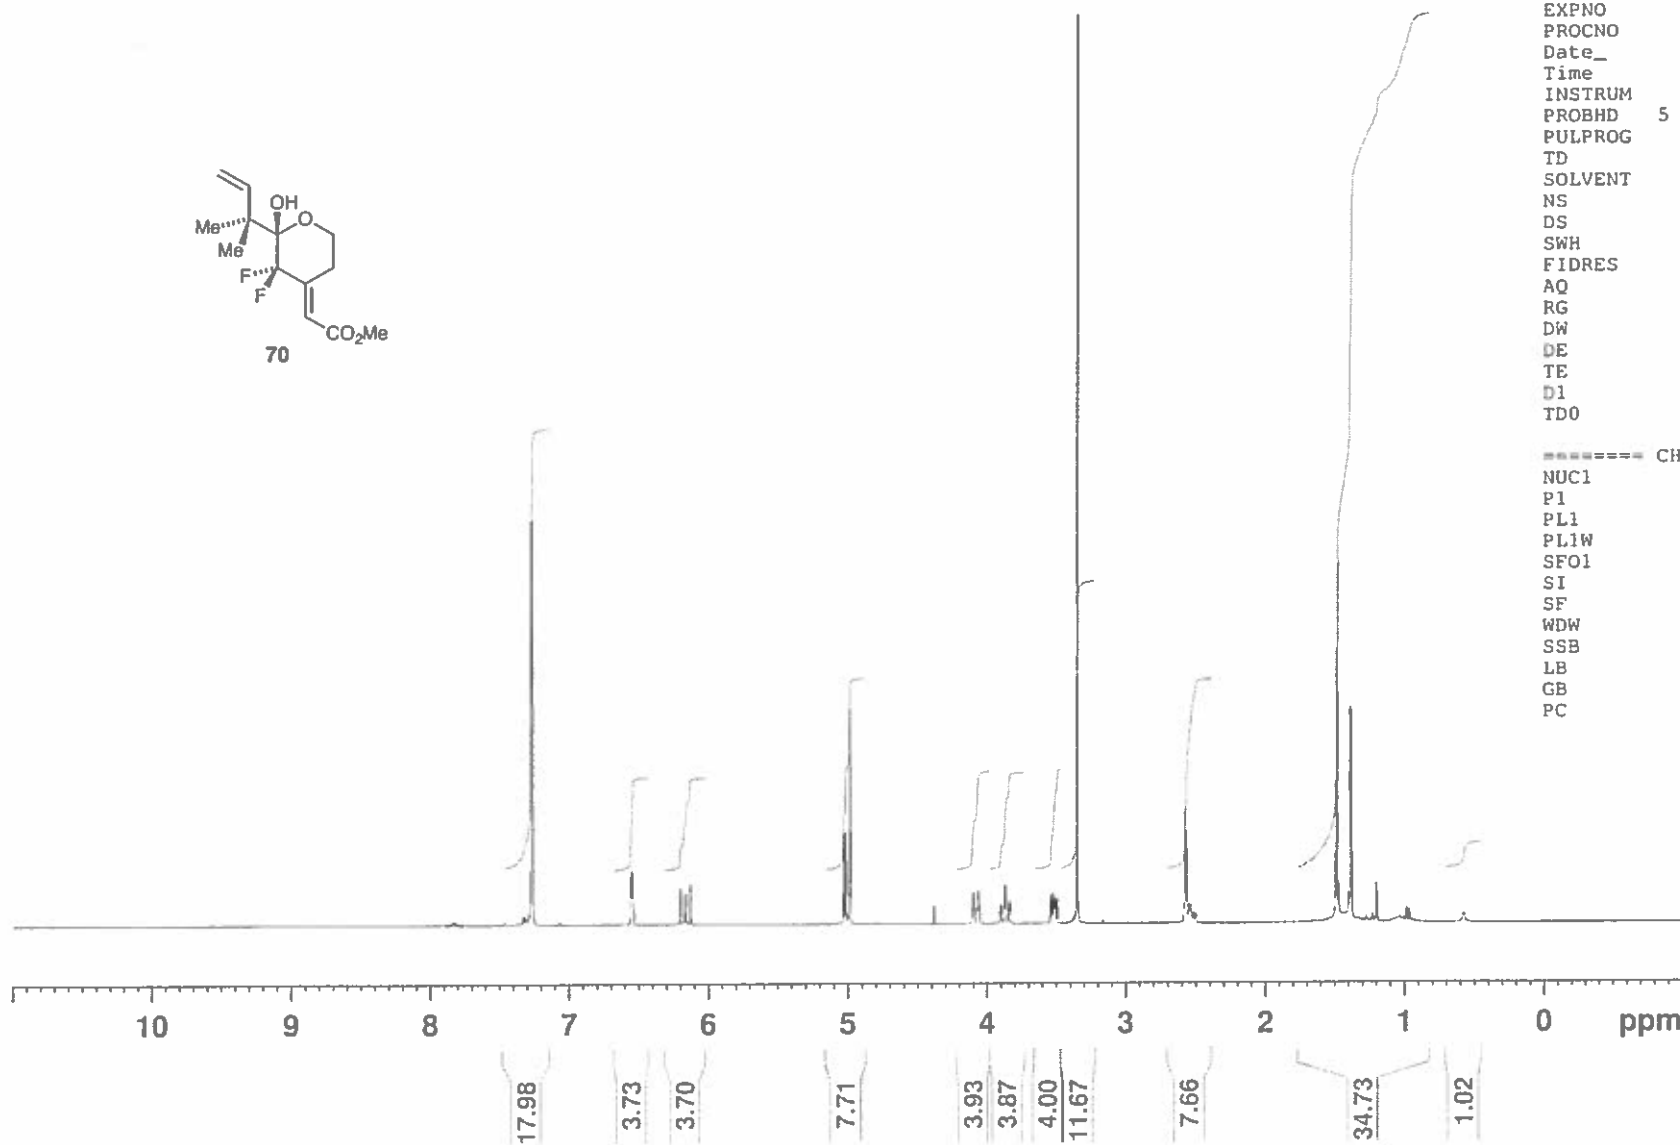

This report was created by ACD/NMR Processor Academic Edition. For more information go to [www.acdlabs.com/nmrproc/](http://www.acdlabs.com/nmrproc/)

|                        |                                                                                                             |                        |                                                                                           |                      |            |
|------------------------|-------------------------------------------------------------------------------------------------------------|------------------------|-------------------------------------------------------------------------------------------|----------------------|------------|
| Acquisition Time (sec) | 1.1010                                                                                                      | Comment                | P. Mears EJTB-PRM152 HF.py 83-11 0514-053 mCARBON C6D6 (E:\bruk500cdata\2014May) staff 28 |                      |            |
| Date                   | 23 May 2014 20:35:28                                                                                        | Date Stamp             | 23 May 2014 20:35:28                                                                      |                      |            |
| File Name              | \\ss7a.ds.man.ac.uk\vol5\vol3\users\snmrdata\bruk500cdata\2014May\data\staff\nmr\2014-05-23-staff-28\12\fid |                        |                                                                                           | Frequency (MHz)      | 125.77     |
| Nucleus                | 13C                                                                                                         | Number of Transients   | 5120                                                                                      | Origin               | spect      |
| Owner                  | nmsu                                                                                                        | Points Count           | 32768                                                                                     | Pulse Sequence       | zgpg30     |
| SW(cyclical) (Hz)      | 29761.90                                                                                                    | Solvent                | BENZENE-d6                                                                                | Receiver Gain        | 184.40     |
| Sweep Width (Hz)       | 29761.00                                                                                                    | Temperature (degree C) | 25.149                                                                                    | Spectrum Offset (Hz) | 12662.5273 |
|                        |                                                                                                             |                        |                                                                                           | Spectrum Type        | STANDARD   |

PRM152-C13NMR.esp

VerticalScaleFactor = 1

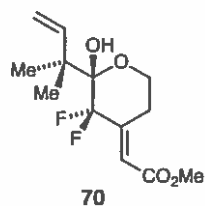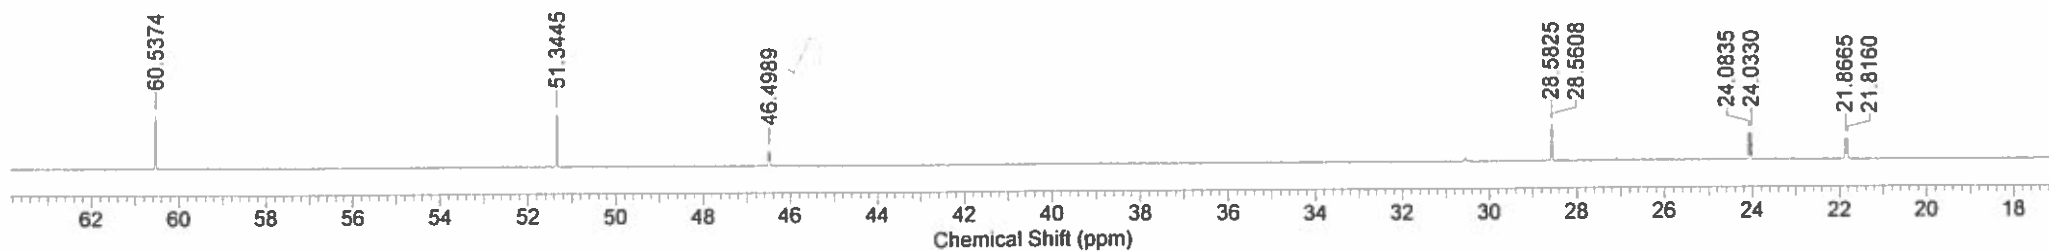

This report was created by ACD/NMR Processor Academic Edition. For more information go to [www.acdlabs.com/nmrproc/](http://www.acdlabs.com/nmrproc/)

|                        |                                                                                                              |                        |                                                                                           |                      |            |
|------------------------|--------------------------------------------------------------------------------------------------------------|------------------------|-------------------------------------------------------------------------------------------|----------------------|------------|
| Acquisition Time (sec) | 1.1010                                                                                                       | Comment                | P. Mears EJ1-PRM152 HF.py 83-11 0514-053 mCARBON C6D6 (E:\bruk500cdata\2014\May) staff 28 |                      |            |
| Date                   | 23 May 2014 20:35:28                                                                                         | Date Stamp             | 23 May 2014 20:35:28                                                                      |                      |            |
| File Name              | \\ss7a.ds.man.ac.uk\vol5\vol3\users\snmrdata\bruk500cdata\2014\May\data\staff\nmr\2014-05-23-staff-28\12\fid |                        |                                                                                           | Frequency (MHz)      | 125.77     |
| Nucleus                | 13C                                                                                                          | Number of Transients   | 5120                                                                                      | Origin               | spect      |
| Owner                  | nmsu                                                                                                         | Points Count           | 32768                                                                                     | Pulse Sequence       | zgpg30     |
| SW(cyclical) (Hz)      | 29761.90                                                                                                     | Solvent                | BENZENE-d6                                                                                | Receiver Gain        | 184.40     |
| Sweep Width (Hz)       | 29761.00                                                                                                     | Temperature (degree C) | 25.149                                                                                    | Spectrum Offset (Hz) | 12662.5273 |
|                        |                                                                                                              |                        |                                                                                           | Spectrum Type        | STANDARD   |

PRM152-C13NMR.esp

VerticalScaleFactor = 1

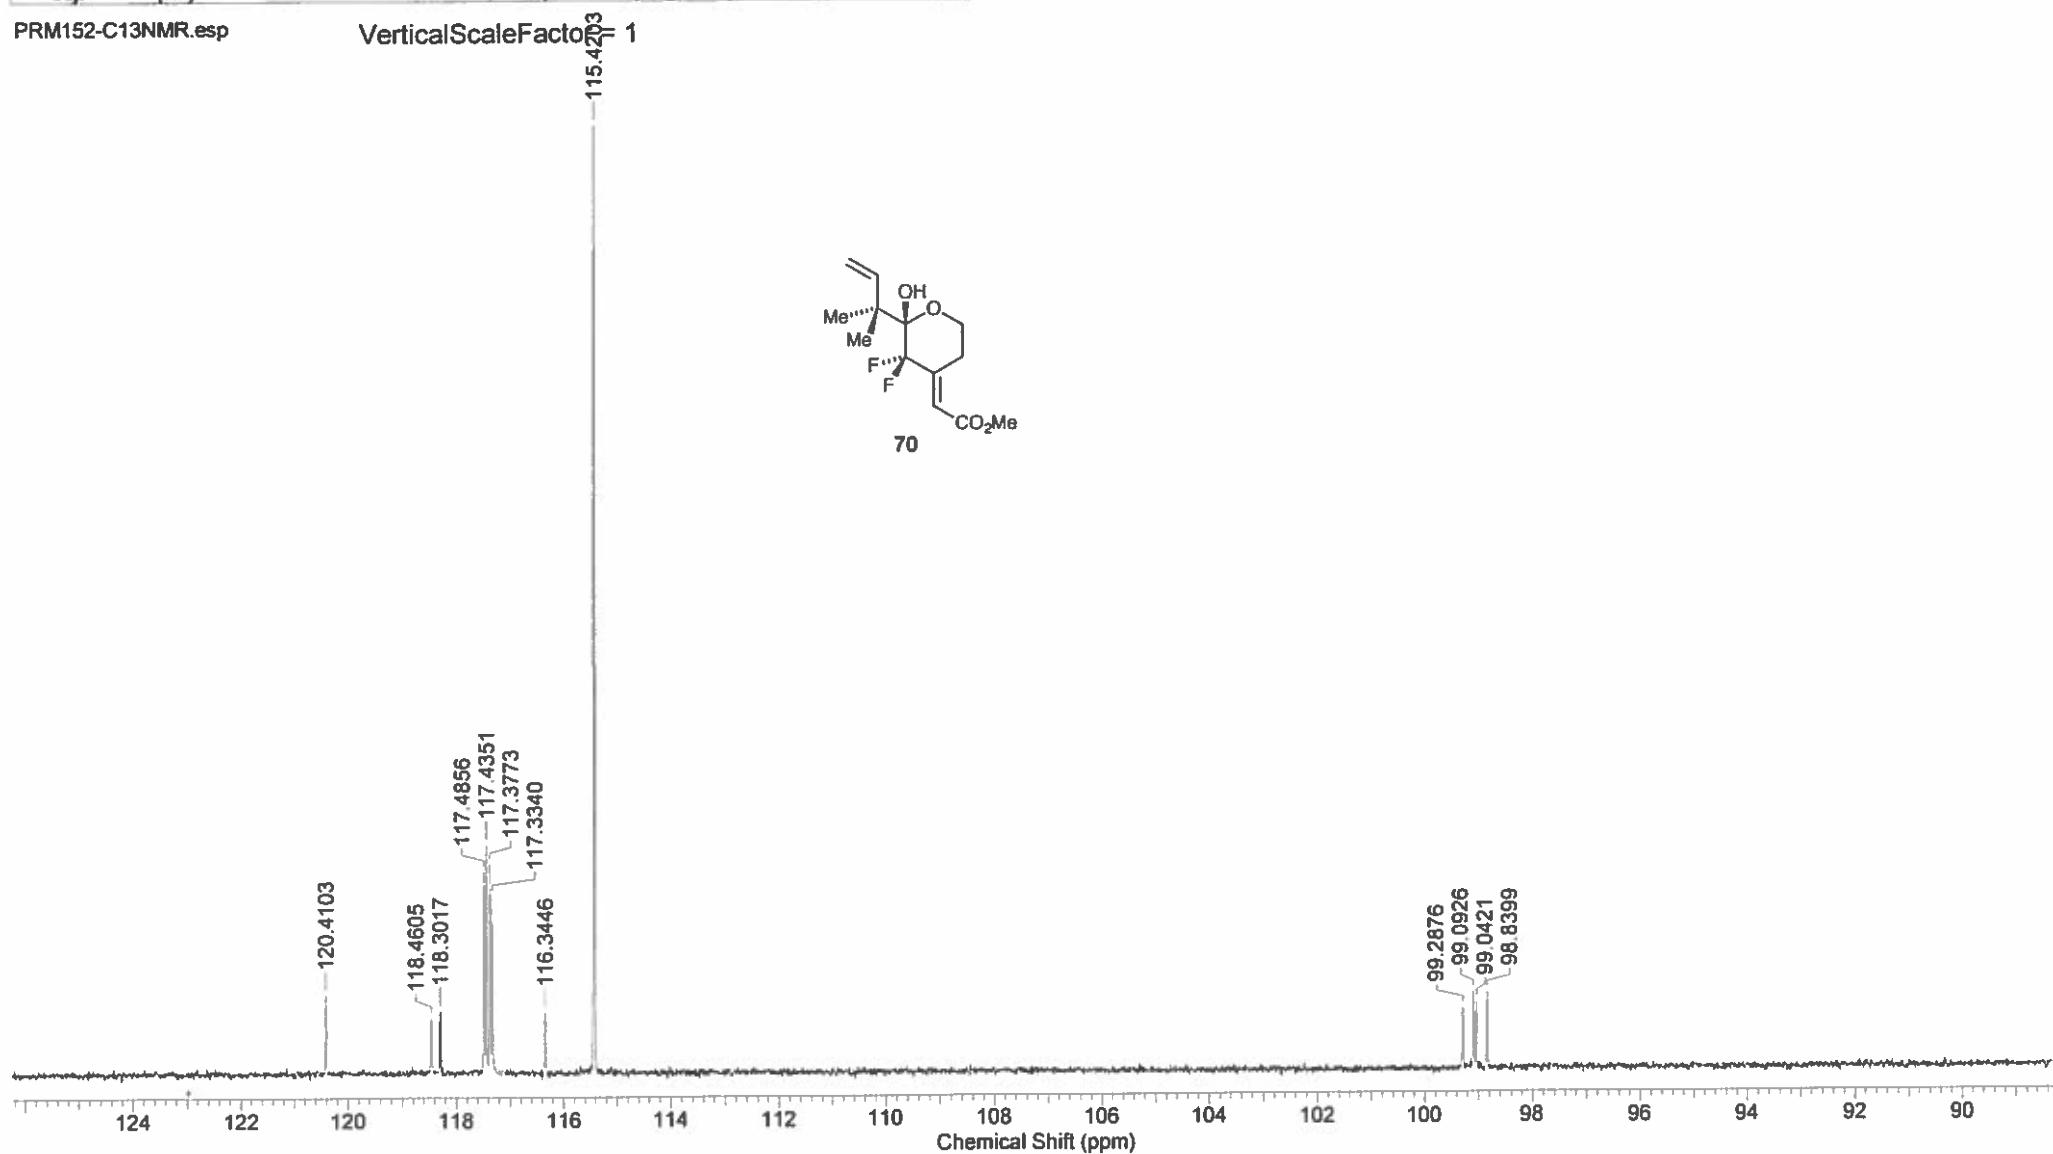

This report was created by ACD/NMR Processor Academic Edition. For more information go to [www.acdlabs.com/nmrproc/](http://www.acdlabs.com/nmrproc/)

|                        |                                                                                                              |                        |                                                                                           |                      |            |
|------------------------|--------------------------------------------------------------------------------------------------------------|------------------------|-------------------------------------------------------------------------------------------|----------------------|------------|
| Acquisition Time (sec) | 1.1010                                                                                                       | Comment                | P. Mears EJ1-PRM152 HF.py 83-11 0514-053 mCARBON C6D6 (E:\bruk500cdata\2014\May) staff 28 |                      |            |
| Date                   | 23 May 2014 20:35:28                                                                                         | Date Stamp             | 23 May 2014 20:35:28                                                                      |                      |            |
| File Name              | \\ss7a.ds.man.ac.uk\vol5\vol3\users\snmrdata\bruk500cdata\2014\May\data\staff\nmr\2014-05-23-staff-28\12\fid |                        |                                                                                           | Frequency (MHz)      | 125.77     |
| Nucleus                | 13C                                                                                                          | Number of Transients   | 5120                                                                                      | Origin               | spect      |
| Owner                  | nmsu                                                                                                         | Points Count           | 32768                                                                                     | Pulse Sequence       | zgpg30     |
| SW(cyclical) (Hz)      | 29761.90                                                                                                     | Solvent                | BENZENE-d6                                                                                | Spectrum Offset (Hz) | 12662.5273 |
| Sweep Width (Hz)       | 29761.00                                                                                                     | Temperature (degree C) | 25.149                                                                                    | Spectrum Type        | STANDARD   |

PRM152-C13NMR.esp

VerticalScaleFactor = 1

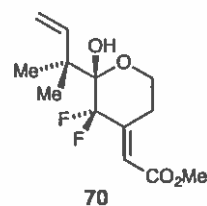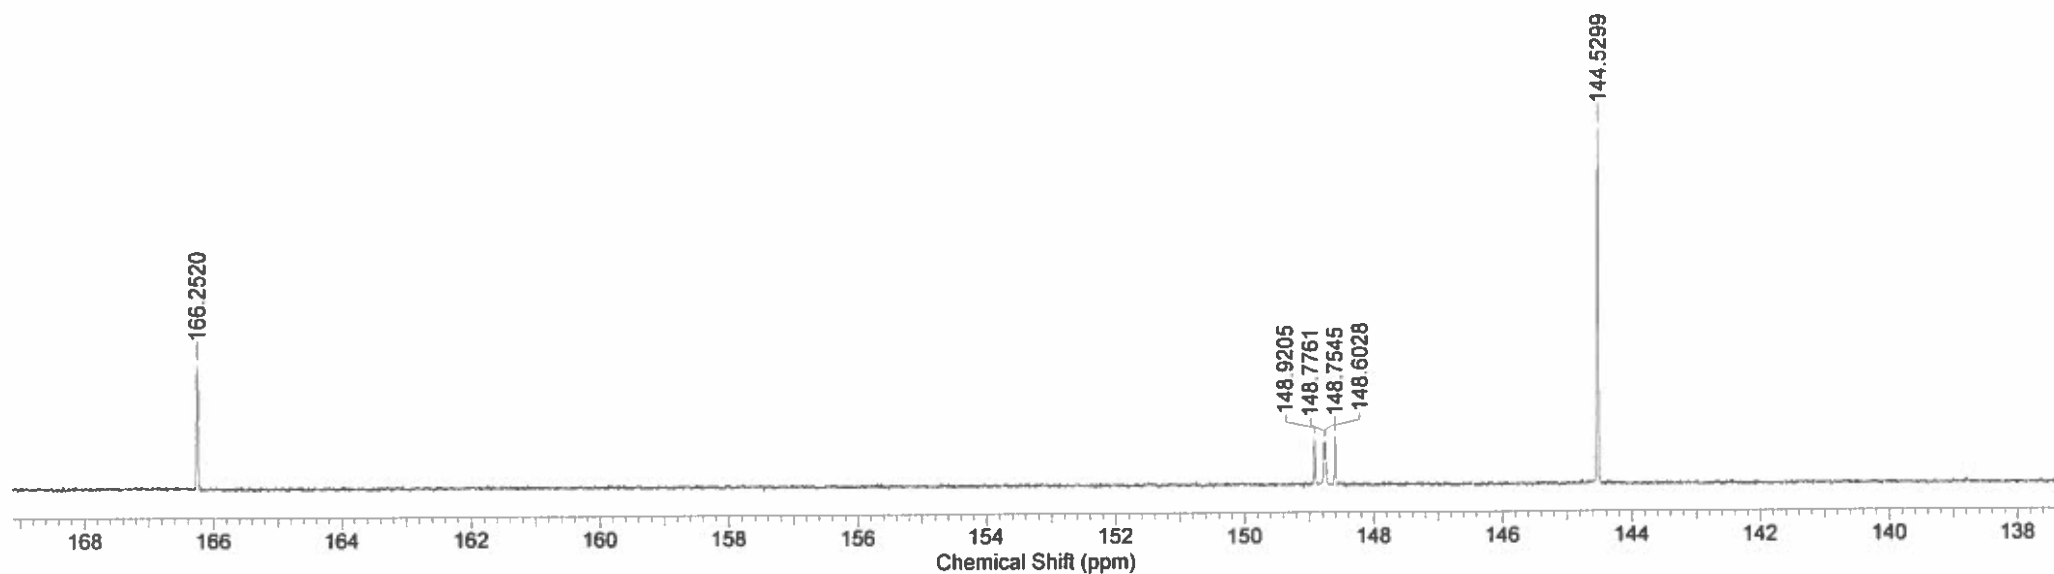

This report was created by ACD/NMR Processor Academic Edition. For more information go to [www.acdlabs.com/nmrproc/](http://www.acdlabs.com/nmrproc/)

|                        |                                                                                                                 |                   |                                                                          |                        |            |                      |             |
|------------------------|-----------------------------------------------------------------------------------------------------------------|-------------------|--------------------------------------------------------------------------|------------------------|------------|----------------------|-------------|
| Acquisition Time (sec) | 0.7340                                                                                                          | Comment           | EJT-PRM152 HF.py f3-11 15mg mF19CPD C6D6 (e:\bruk400data\2014\May) ejt 2 |                        |            |                      |             |
| Date                   | 23 May 2014 12:14:08                                                                                            | Date Stamp        | 23 May 2014 12:14:08                                                     |                        |            |                      |             |
| File Name              | \\ss7a.ds.man.ac.uk\vol5\VOL3\USERS\SNMRDATA\BRUK400DATA\2014\MAY\DATA\EJT\NMR\2014-05-23-EJT-2\11\1\PDATA\111R |                   |                                                                          |                        |            |                      |             |
| Frequency (MHz)        | 376.50                                                                                                          | Nucleus           | 19F                                                                      | Number of Transients   | 16         | Origin               | AV400       |
| Original Points Count  | 65536                                                                                                           | Owner             | Administrator                                                            | Points Count           | 262144     | Pulse Sequence       | zgig        |
| Receiver Gain          | 4100.00                                                                                                         | SW(cyclical) (Hz) | 89285.71                                                                 | Solvent                | BENZENE-d6 | Spectrum Offset (Hz) | -37649.5977 |
| Spectrum Type          | STANDARD                                                                                                        | Sweep Width (Hz)  | 89285.37                                                                 | Temperature (degree C) | 22.300     |                      |             |

2014-05-23-EJT-2.011.001.1R.esp VerticalScaleFactor = 1

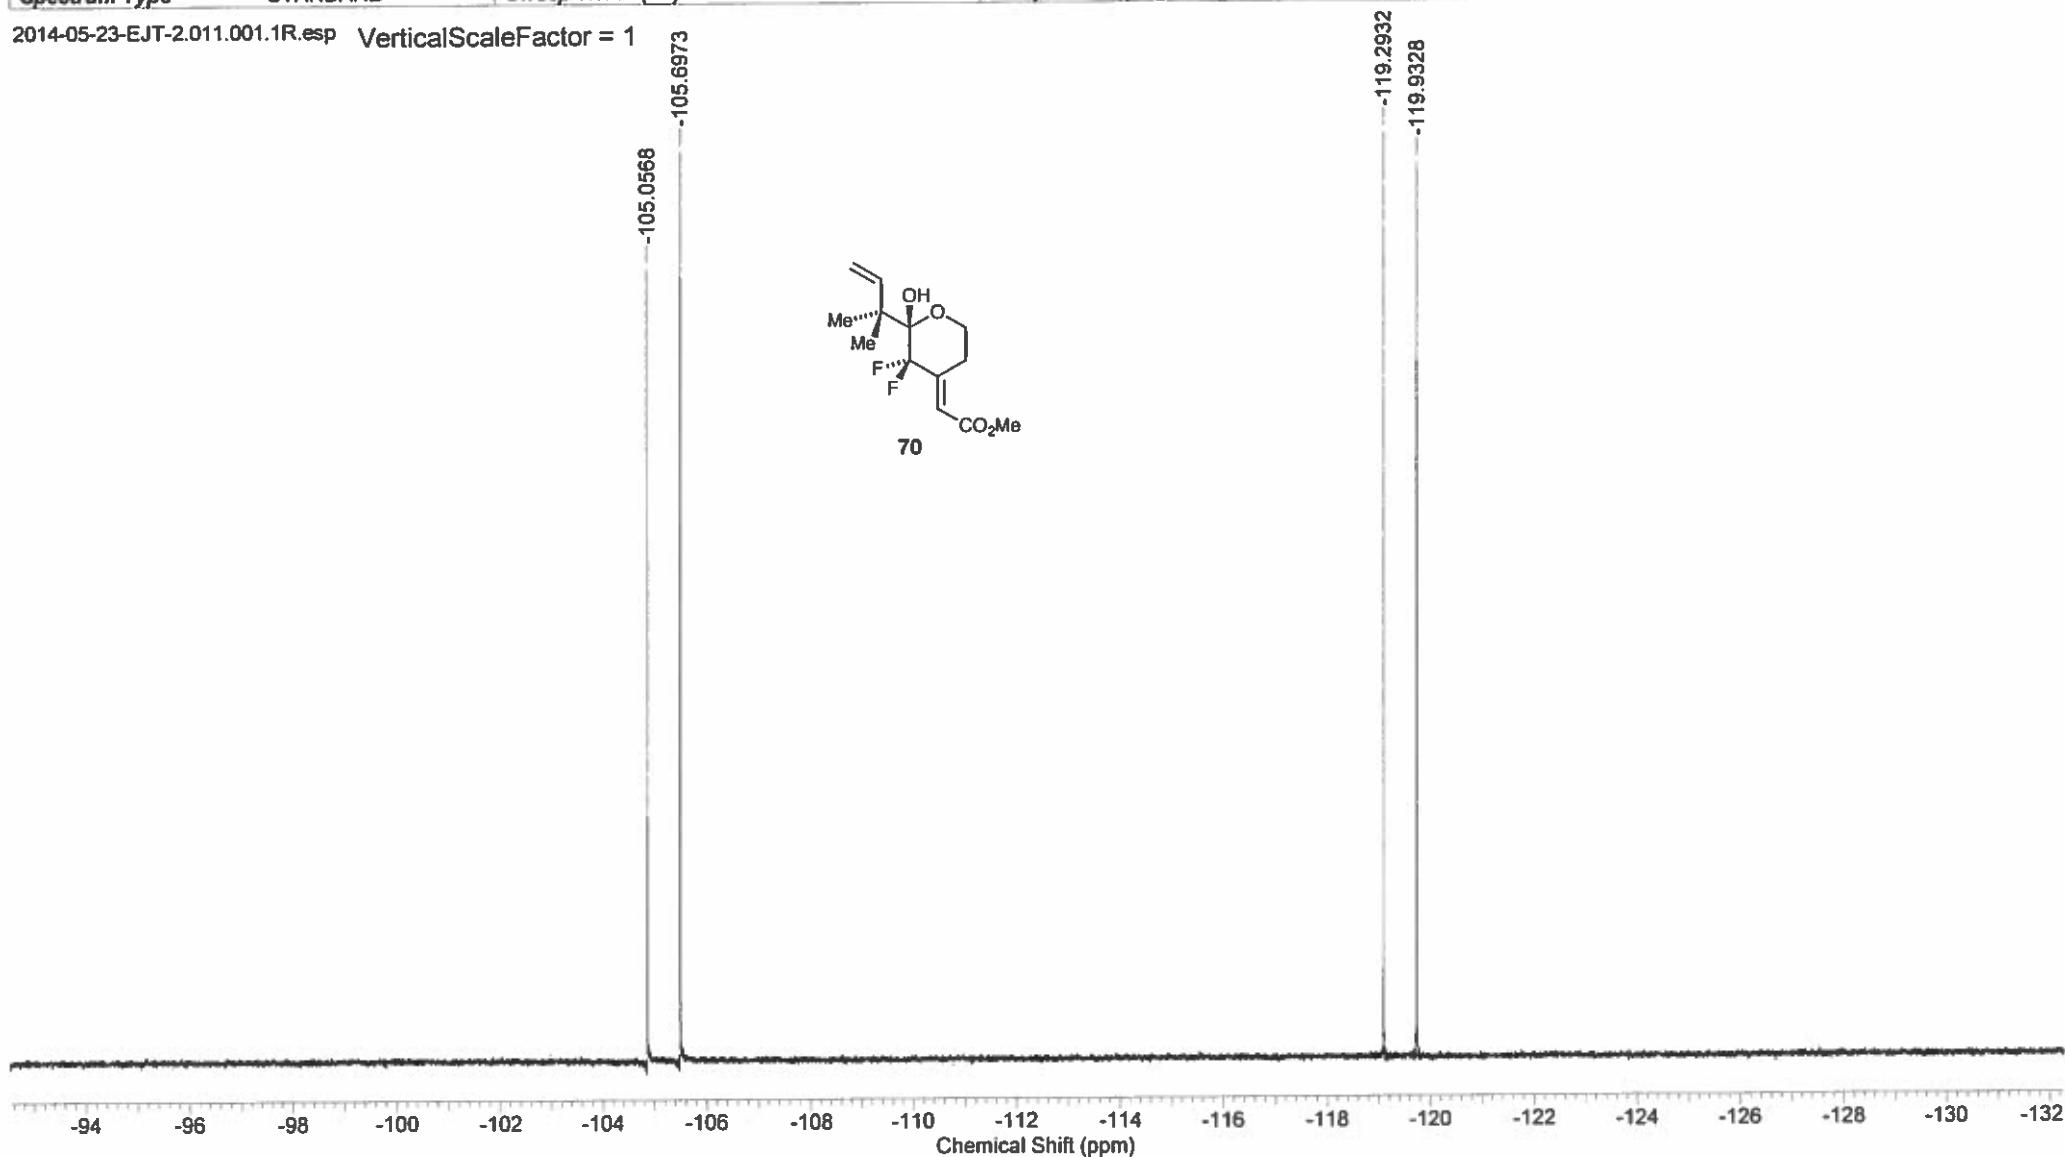

This report was created by ACD/NMR Processor Academic Edition. For more information go to [www.acdlabs.com/nmrproc/](http://www.acdlabs.com/nmrproc/)

|                        |                                                                                                          |                        |                                                                         |                       |           |
|------------------------|----------------------------------------------------------------------------------------------------------|------------------------|-------------------------------------------------------------------------|-----------------------|-----------|
| Acquisition Time (sec) | 3.9649                                                                                                   | Comment                | EJT-PRM161 f15-35 289mg mPROTON CDCl3 (e:\bruk400adata\2015\Feb) ejt 22 |                       |           |
| Date                   | 25 Feb 2015 16:36:16                                                                                     | Date Stamp             | 25 Feb 2015 16:36:16                                                    |                       |           |
| File Name              | \\ss7a.ds.man.ac.uk\vol5\vol3\users\snmrdata\bruk400adata\2015\Feb\data\ejt\nmr\2015-02-25-ejt-22\10\vid | Frequency (MHz)        | 400.13                                                                  | Original Points Count | 32768     |
| Nucleus                | 1H                                                                                                       | Number of Transients   | 16                                                                      | Origin                | AV400     |
| Owner                  | nmrsu                                                                                                    | Points Count           | 32768                                                                   | Pulse Sequence        | zg30b     |
| SW(cyclical) (Hz)      | 8264.46                                                                                                  | Solvent                | CHLOROFORM-d                                                            | Spectrum Offset (Hz)  | 2464.6748 |
| Sweep Width (Hz)       | 8264.21                                                                                                  | Temperature (degree C) | 19.900                                                                  | Spectrum Type         | STANDARD  |

PRM161aldehyde-HNMR.esp

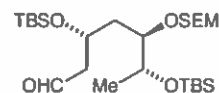

72

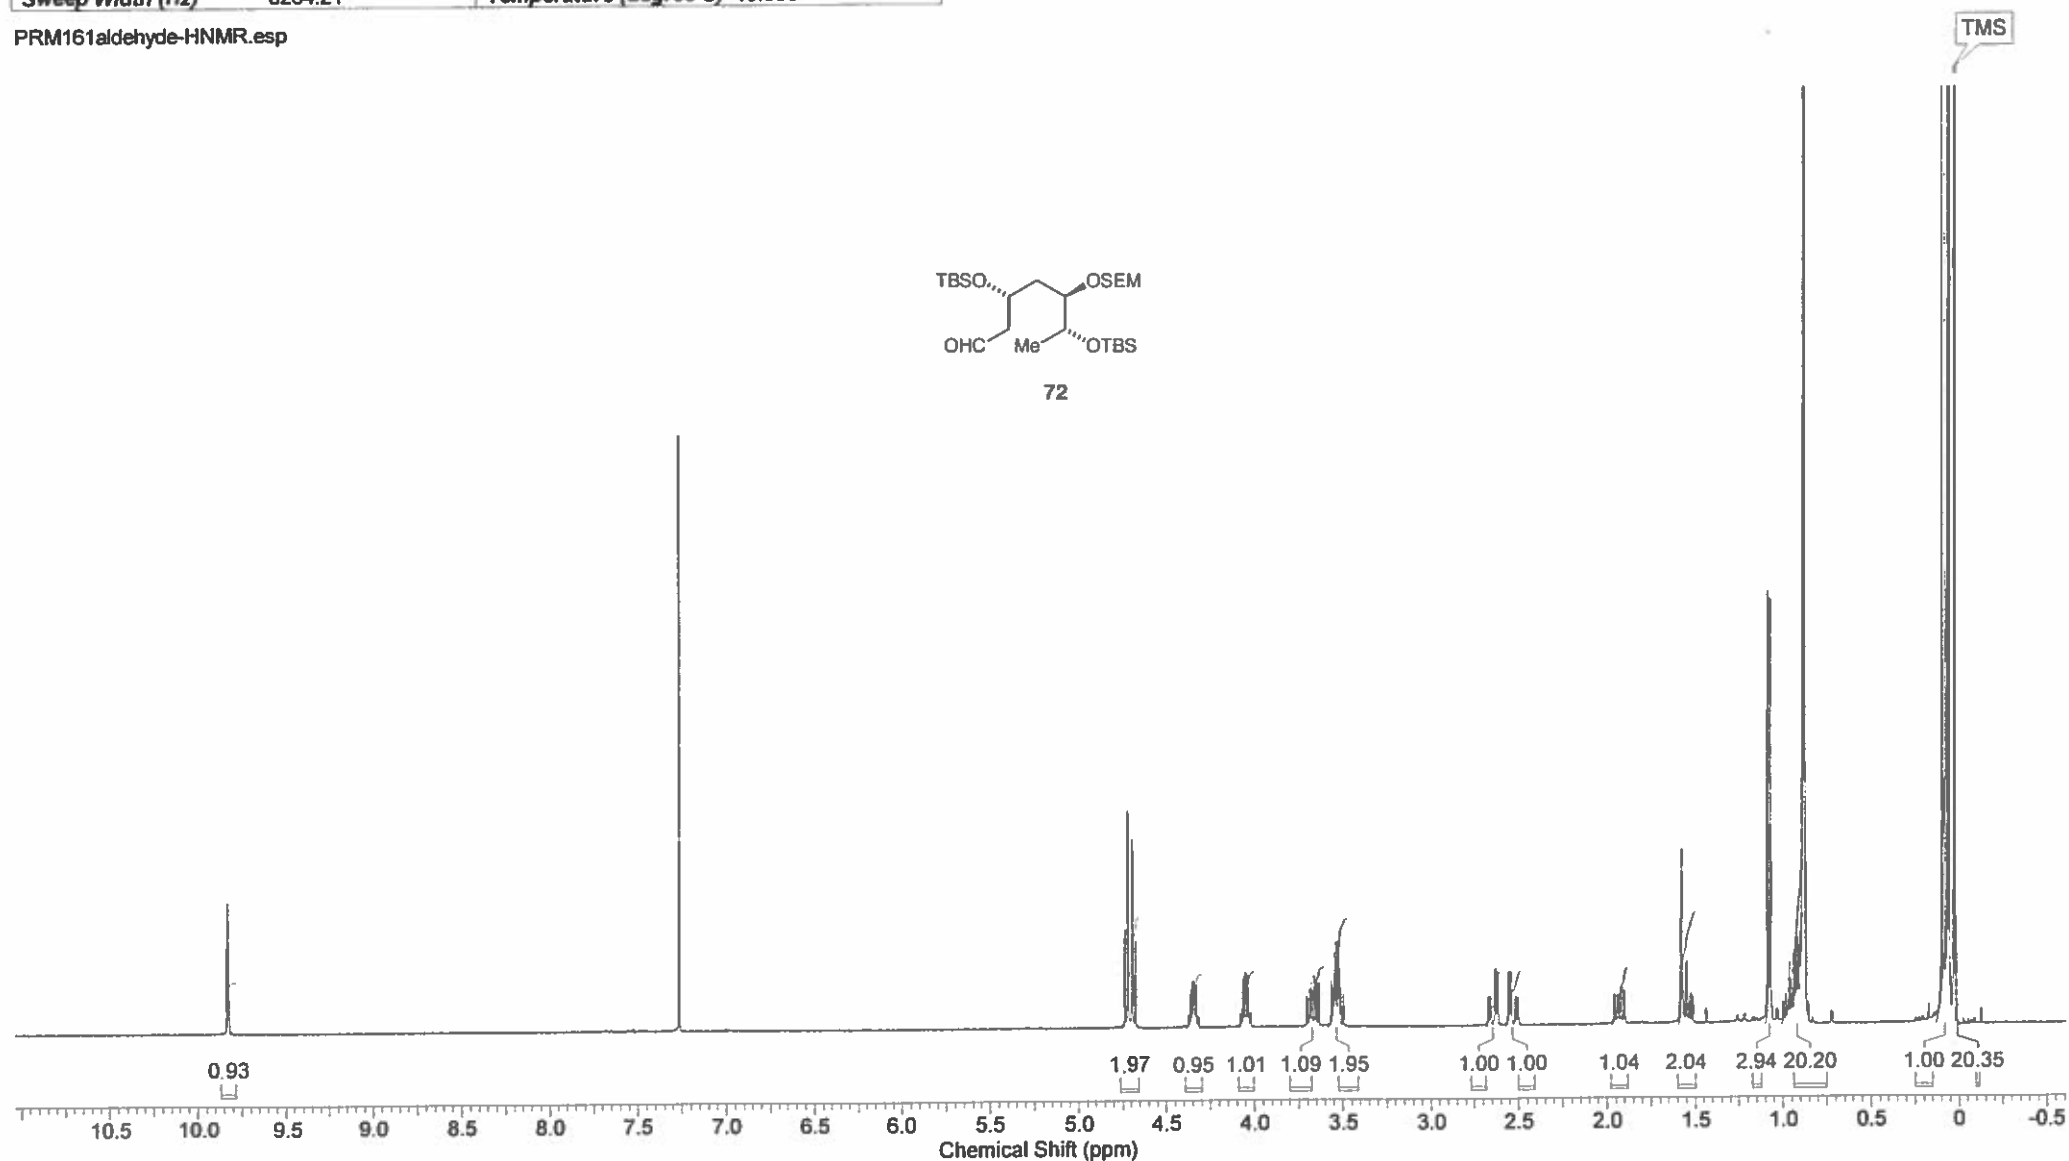

This report was created by ACD/NMR Processor Academic Edition. For more information go to [www.acdlabs.com/nmrproc/](http://www.acdlabs.com/nmrproc/)

|                                                                                                                                                                    |                                                                                                         |                                                                               |              |                      |            |                       |          |
|--------------------------------------------------------------------------------------------------------------------------------------------------------------------|---------------------------------------------------------------------------------------------------------|-------------------------------------------------------------------------------|--------------|----------------------|------------|-----------------------|----------|
| This report was created by ACD/NMR Processor Academic Edition. For more information go to <a href="http://www.acdlabs.com/nmr/proc/">www.acdlabs.com/nmr/proc/</a> |                                                                                                         |                                                                               |              |                      |            |                       |          |
| Acquisition Time (sec)                                                                                                                                             | 1.3631                                                                                                  | Comment EJT-PRM161 aldehyde mCARBON B CDCl3 (e:\bruk400cdata\2014\Nov) ejt 20 |              |                      |            |                       |          |
| Date                                                                                                                                                               | 29 Nov 2014 17:23:12                                                                                    | Date Stamp                                                                    |              | 29 Nov 2014 17:23:12 |            |                       |          |
| File Name                                                                                                                                                          | \\ss7a.ds.man.ac.uk\vol5\vol3\users\snmrdata\bruk400cdata\2014\Nov\data\ejt\nmr\2014-11-29-ejt-20\30vid |                                                                               |              | Frequency (MHz)      | 100.60     |                       |          |
| Nucleus                                                                                                                                                            | 13C                                                                                                     | Number of Transients                                                          | 1024         | Origin               | spect      | Original Points Count | 32768    |
| Owner                                                                                                                                                              | nmrsu                                                                                                   | Points Count                                                                  | 32768        | Pulse Sequence       | zgpg30     | Receiver Gain         | 45.20    |
| SW(cyclical) (Hz)                                                                                                                                                  | 24038.46                                                                                                | Solvent                                                                       | CHLOROFORM-d | Spectrum Offset (Hz) | 10053.5352 | Spectrum Type         | STANDARD |
| Sweep Width (Hz)                                                                                                                                                   | 24037.73                                                                                                | Temperature (degree C)                                                        | 23.149       |                      |            |                       |          |

2014-11-29-ejt-20.030.esp

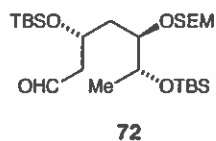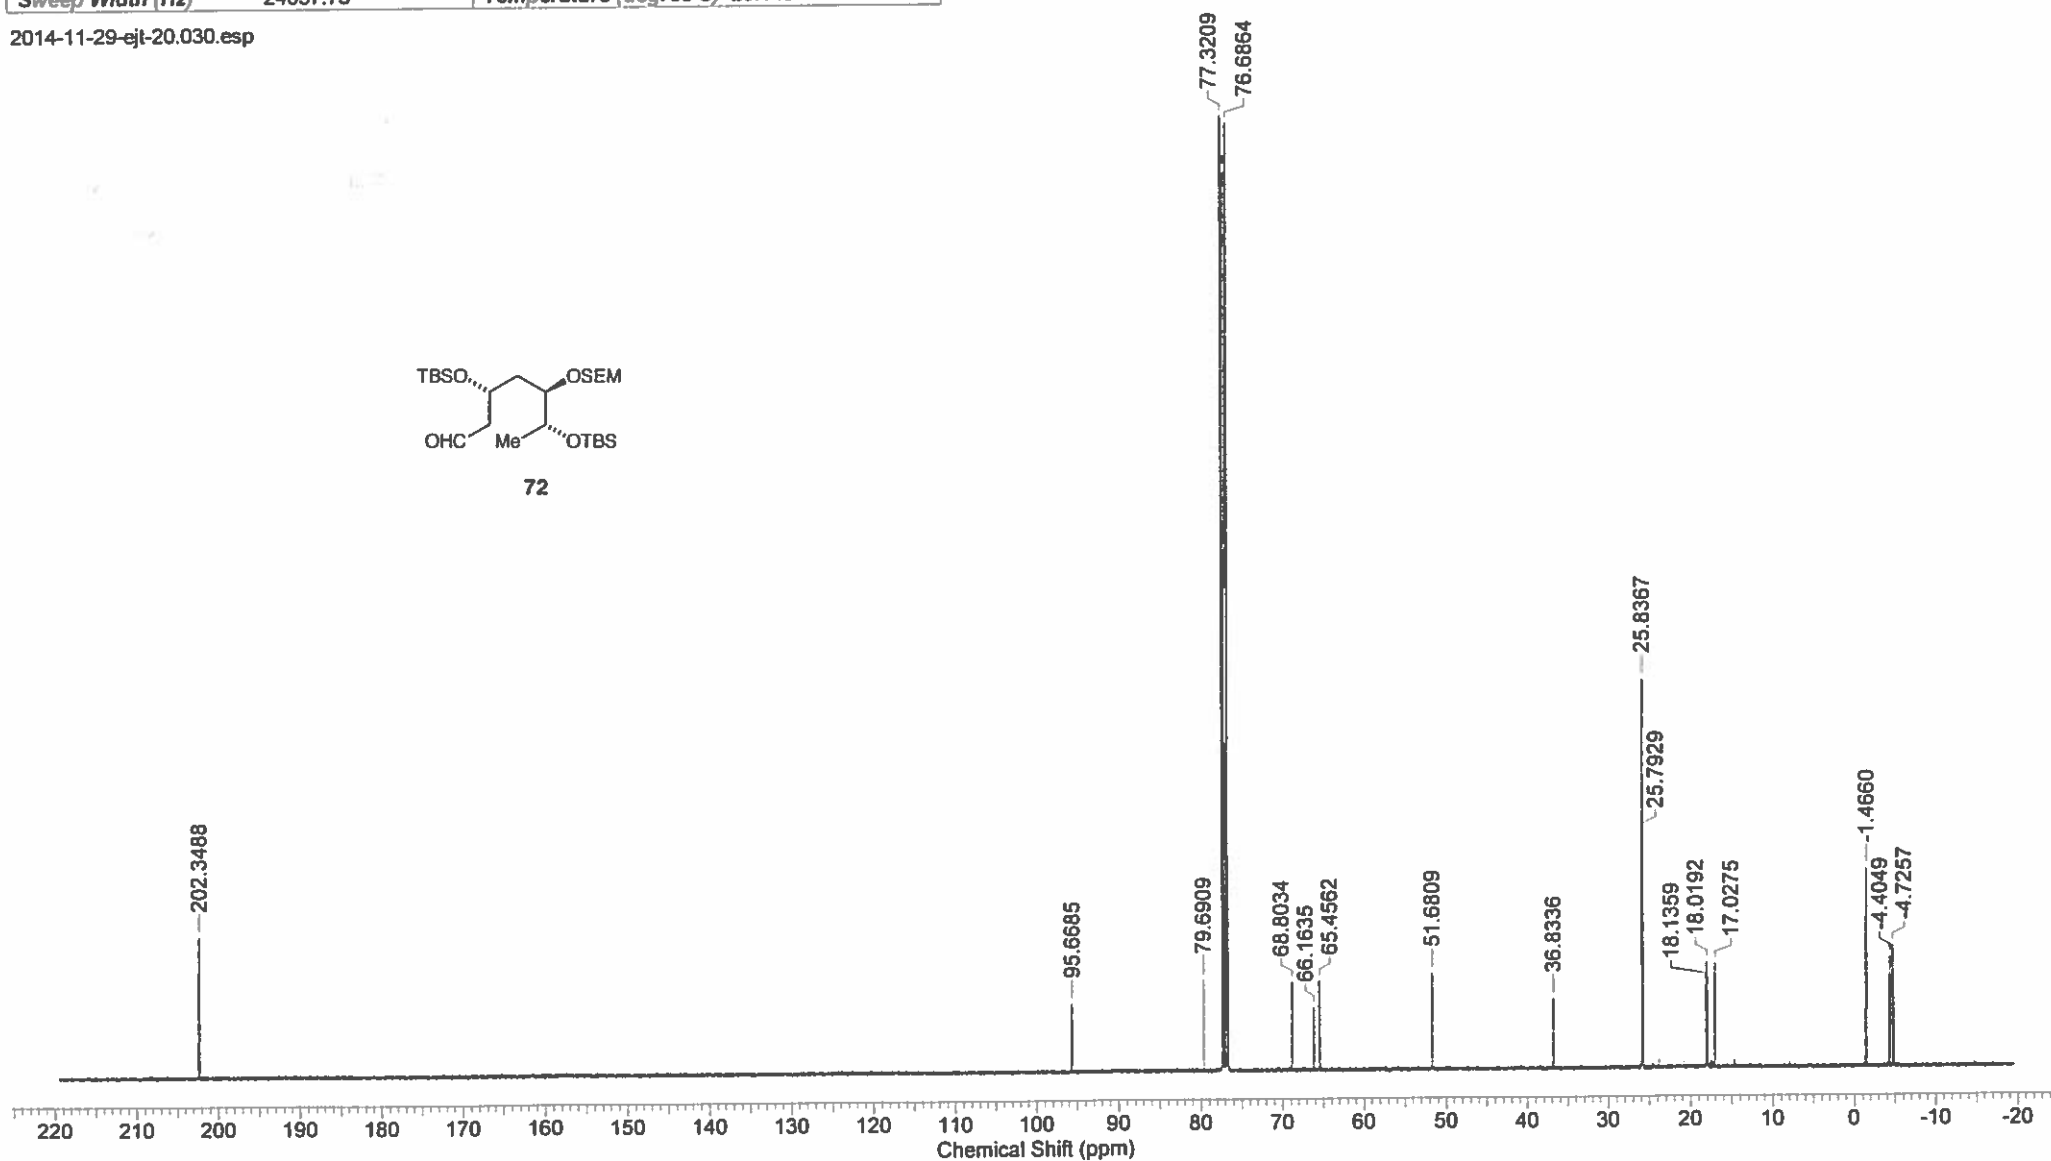



This report was created by ACD/NMR Processor Academic Edition. For more information go to [www.acdlabs.com/nmrproc/](http://www.acdlabs.com/nmrproc/)

|                        |                                                                                                      |                        |                                                                                                |                      |           |
|------------------------|------------------------------------------------------------------------------------------------------|------------------------|------------------------------------------------------------------------------------------------|----------------------|-----------|
| Acquisition Time (sec) | 3.9649                                                                                               | Comment                | EJT-PRM166 f12+13 34mg clean front diastereomer? mPROTON CDCl3 (e:\bruk400adata\2015Jan)\ejt 2 |                      |           |
| Date                   | 08 Jan 2015 13:17:52                                                                                 | Date Stamp             | 08 Jan 2015 13:17:52                                                                           |                      |           |
| File Name              | \ss7a.ds.man.ac.uk\vol5\vol3\users\snmrdata\bruk400adata\2015Jan\data\ejt\nmr\2015-01-08-ejt-2\13vid |                        |                                                                                                | Frequency (MHz)      | 400.13    |
| Nucleus                | 1H                                                                                                   | Number of Transients   | 16                                                                                             | Origin               | AV400     |
| Owner                  | nmrsu                                                                                                | Points Count           | 32768                                                                                          | Pulse Sequence       | zg30b     |
| SW(cyclical) (Hz)      | 8264.46                                                                                              | Solvent                | CHLOROFORM-d                                                                                   | Spectrum Offset (Hz) | 2464.9270 |
| Sweep Width (Hz)       | 8264.21                                                                                              | Temperature (degree C) | 23.000                                                                                         | Receiver Gain        | 101.00    |
|                        |                                                                                                      |                        |                                                                                                | Spectrum Type        | STANDARD  |

PRM166-frontdiast-HNMR.esp

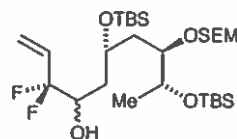

73

(less polar)

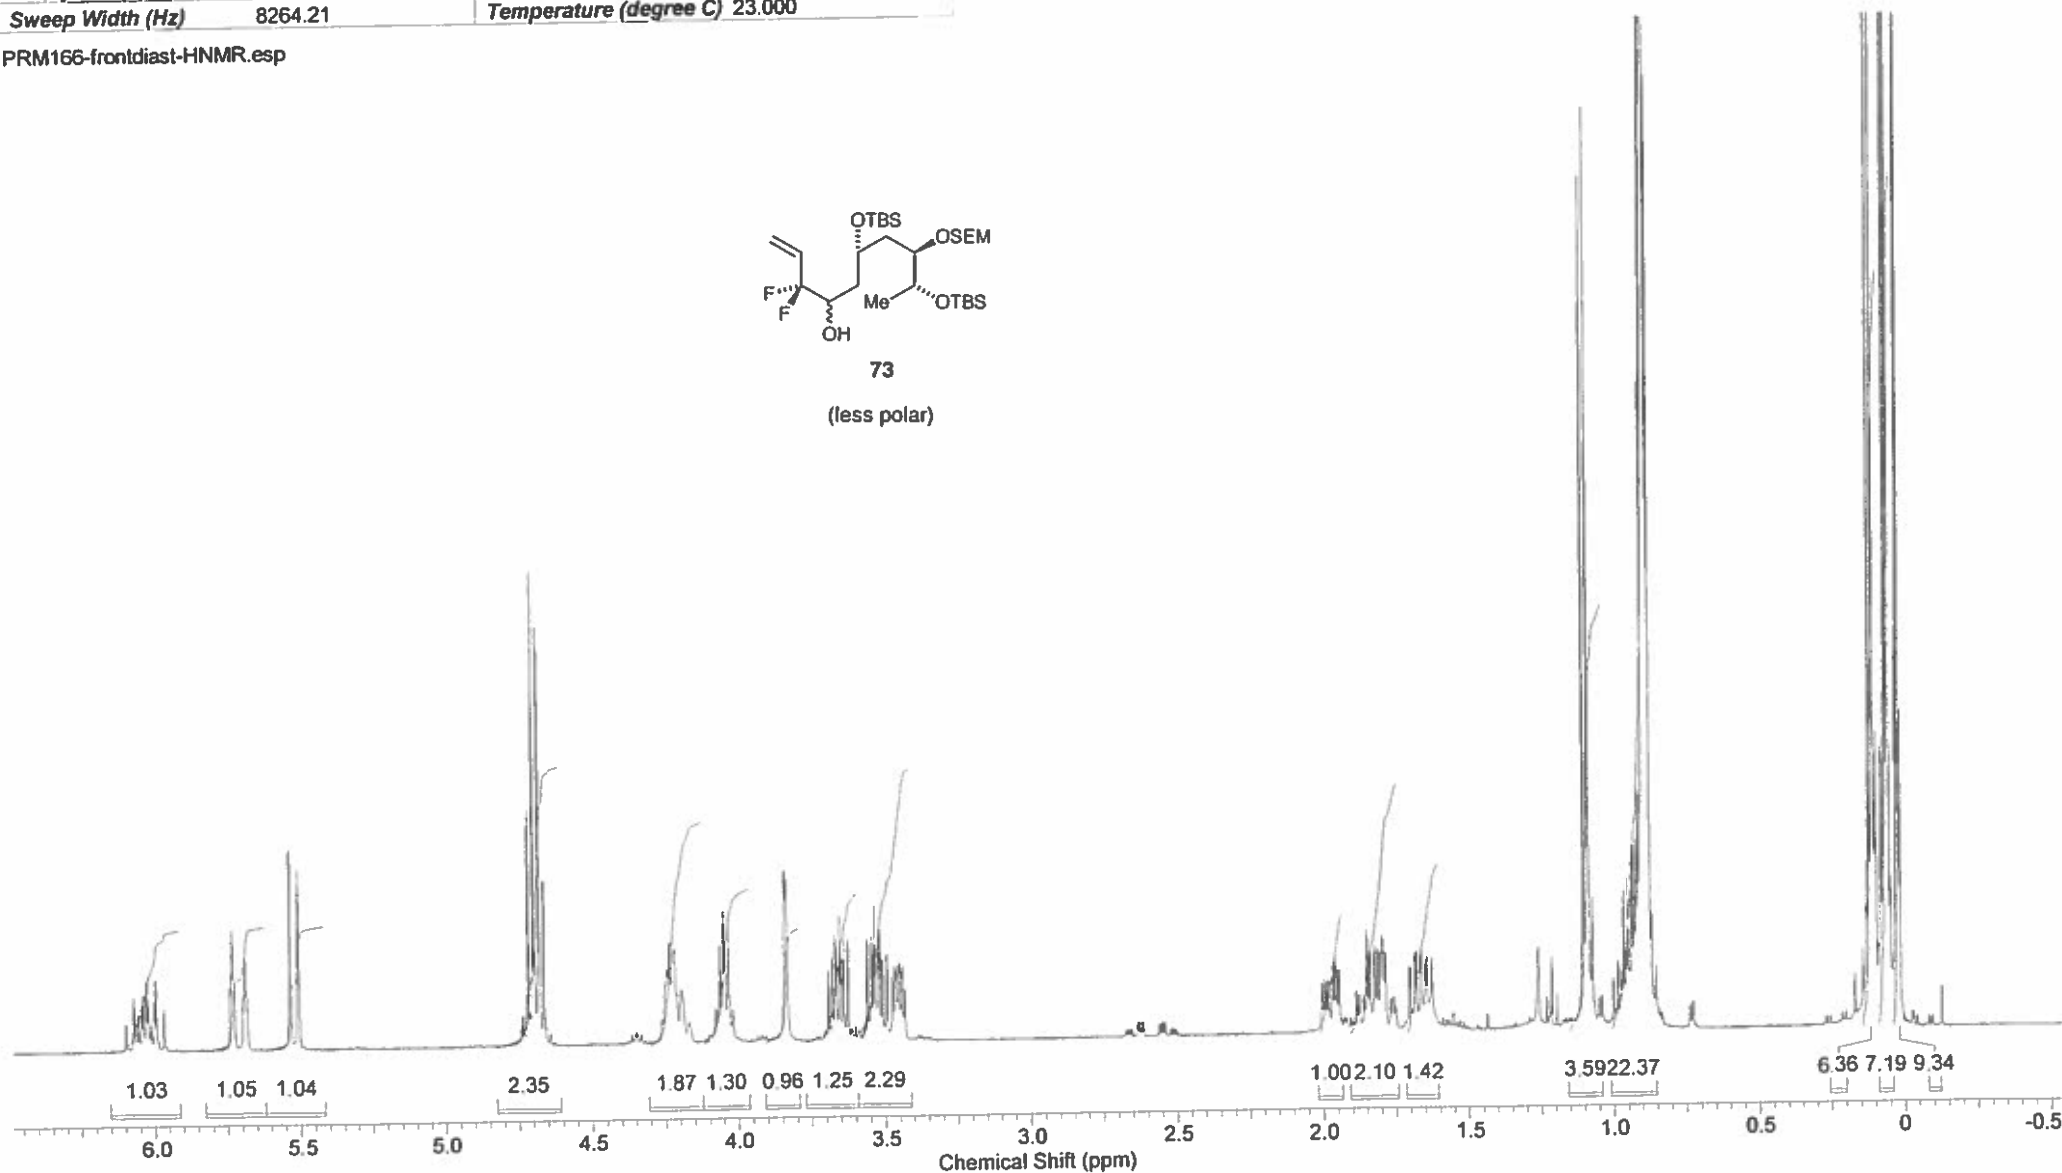

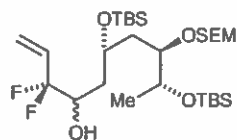

73

(less polar)

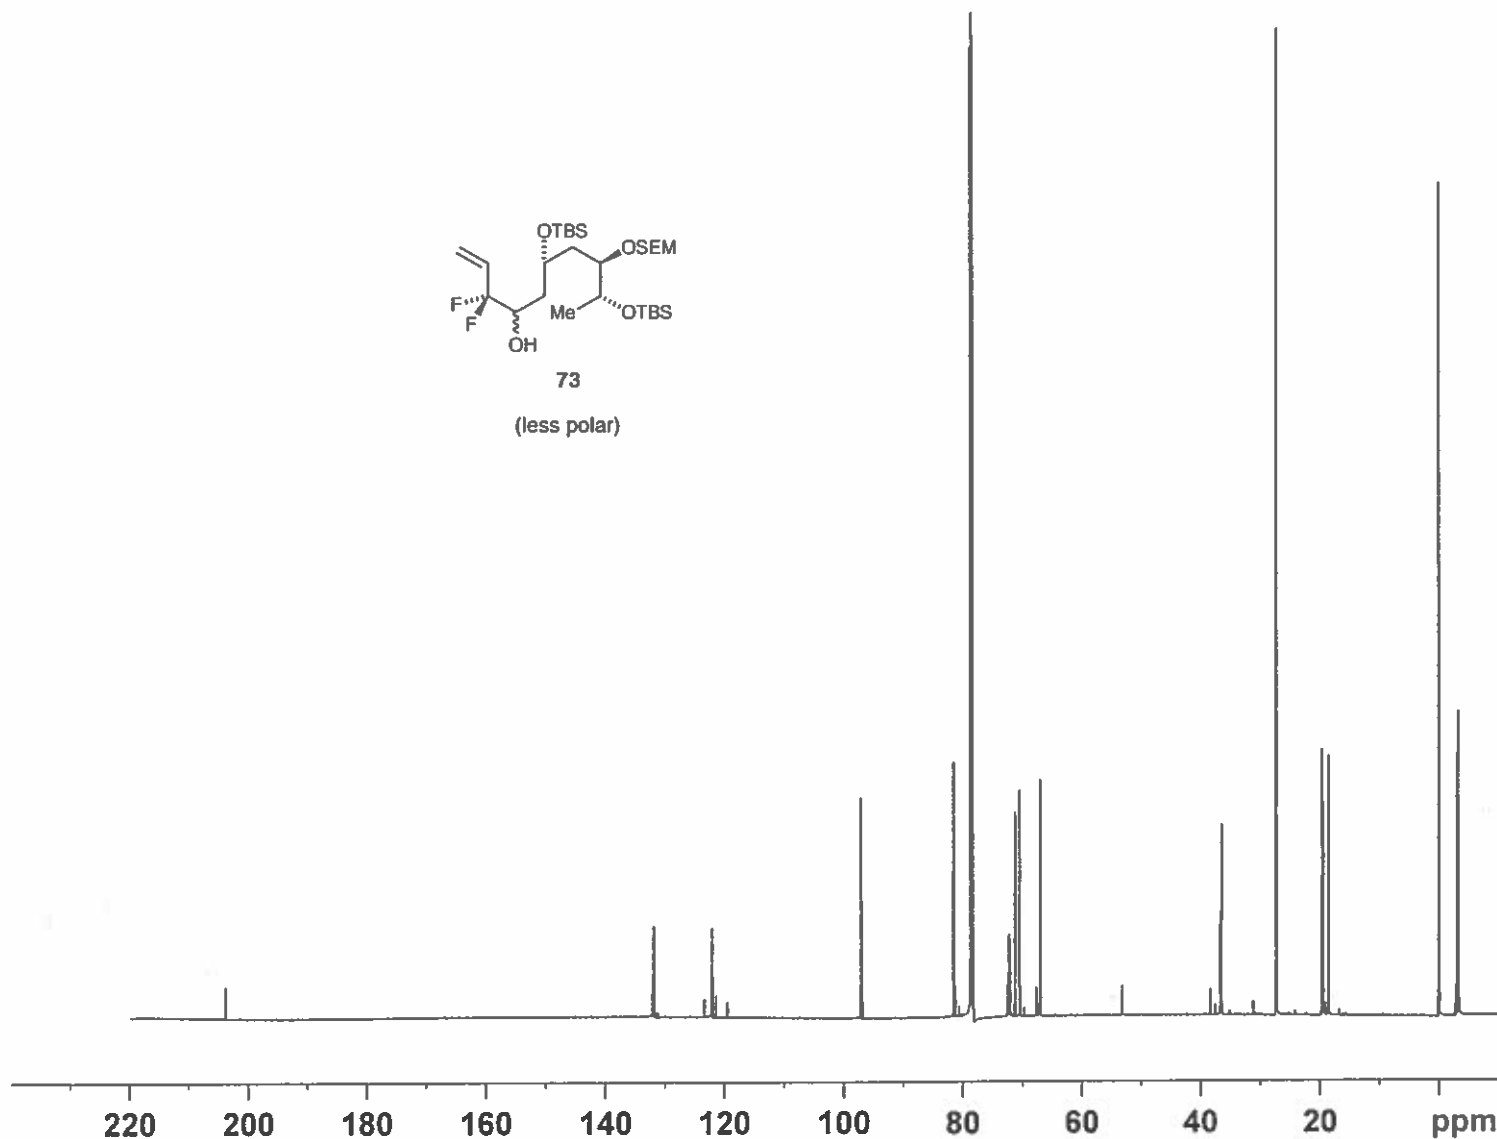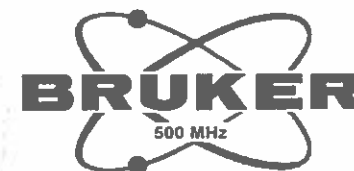

```
Current Data Parameters
NAME      2015-01-09-staff-7
EXPNO      11
PROCNO     1
```

```

F2 - Acquisition Parameters
Date_                20150109
Time_                18.18
INSTRUM              spect
PROBHD               5 mm CPPBBO BB
PULPROG              zgpg30
TD                   65536
SOLVENT              CDC13
NS                    5000
DS                     4
SWH                  29761.904 Hz
FIDRES               0.454131 Hz
AQ                   1.1010048 sec
RG                    184.4
DW                   16.800 usec
DE                   102.82 usec
TE                   298.0 K
D1                   2.00000000 sec
D11                  0.03000000 sec
TD0                   1

```

```
===== CHANNEL f1 =====
SFO1      125.7854504 MHz
NUC1              13C
P1              10.00 usec
PLW1      53.59999847 W
```

```
===== CHANNEL f2 =====
SFO2      500.1920008 MHz
NUC2      1H
PCDPRG[2] waltz16
PCPD2      80.00 usec
PLW2      16.00000000 W
PLW12     0.28622001 W
PLW13     0.18318000 W
```

```

F2 - Processing parameters
SI                      32768
SF                      125.7726921 MHz
WDW                      EM
SSB                      0
LB                      1.00 Hz
GB                      0
PC                      1.40

```

This report was created by ACD/NMR Processor Academic Edition. For more information go to [www.acdlabs.com/nmrproc/](http://www.acdlabs.com/nmrproc/)

|                        |                                                                                                       |                        |                                                                                                 |                      |             |
|------------------------|-------------------------------------------------------------------------------------------------------|------------------------|-------------------------------------------------------------------------------------------------|----------------------|-------------|
| Acquisition Time (sec) | 0.7340                                                                                                | Comment                | EJT-PRM166 f12+13 34mg clean front diastereomer? mF19CPD CDCl3 (e:\bruk400adata\2015\Jan) ejt 2 |                      |             |
| Date                   | 08 Jan 2015 13:22:08                                                                                  | Date Stamp             | 08 Jan 2015 13:22:08                                                                            |                      |             |
| File Name              | \ss7a.ds.man.ac.uk\vol5\vol3\users\snmrdata\bruk400adata\2015\Jan\data\ejt\nmr\2015-01-08-ejt-2\15Vid |                        |                                                                                                 | Frequency (MHz)      | 376.50      |
| Nucleus                | 19F                                                                                                   | Number of Transients   | 16                                                                                              | Origin               | AV400       |
| Owner                  | nmsu                                                                                                  | Points Count           | 65536                                                                                           | Pulse Sequence       | zgig        |
| SW(cyclical) (Hz)      | 89285.71                                                                                              | Solvent                | CHLOROFORM-d                                                                                    | Receiver Gain        | 2050.00     |
| Sweep Width (Hz)       | 89284.35                                                                                              | Temperature (degree C) | 23.000                                                                                          | Spectrum Offset (Hz) | -37649.5977 |
|                        |                                                                                                       |                        |                                                                                                 | Spectrum Type        | STANDARD    |

PRM166-frontdiast-F{H}NMR.esp

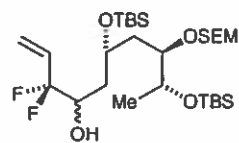

73

(less polar)

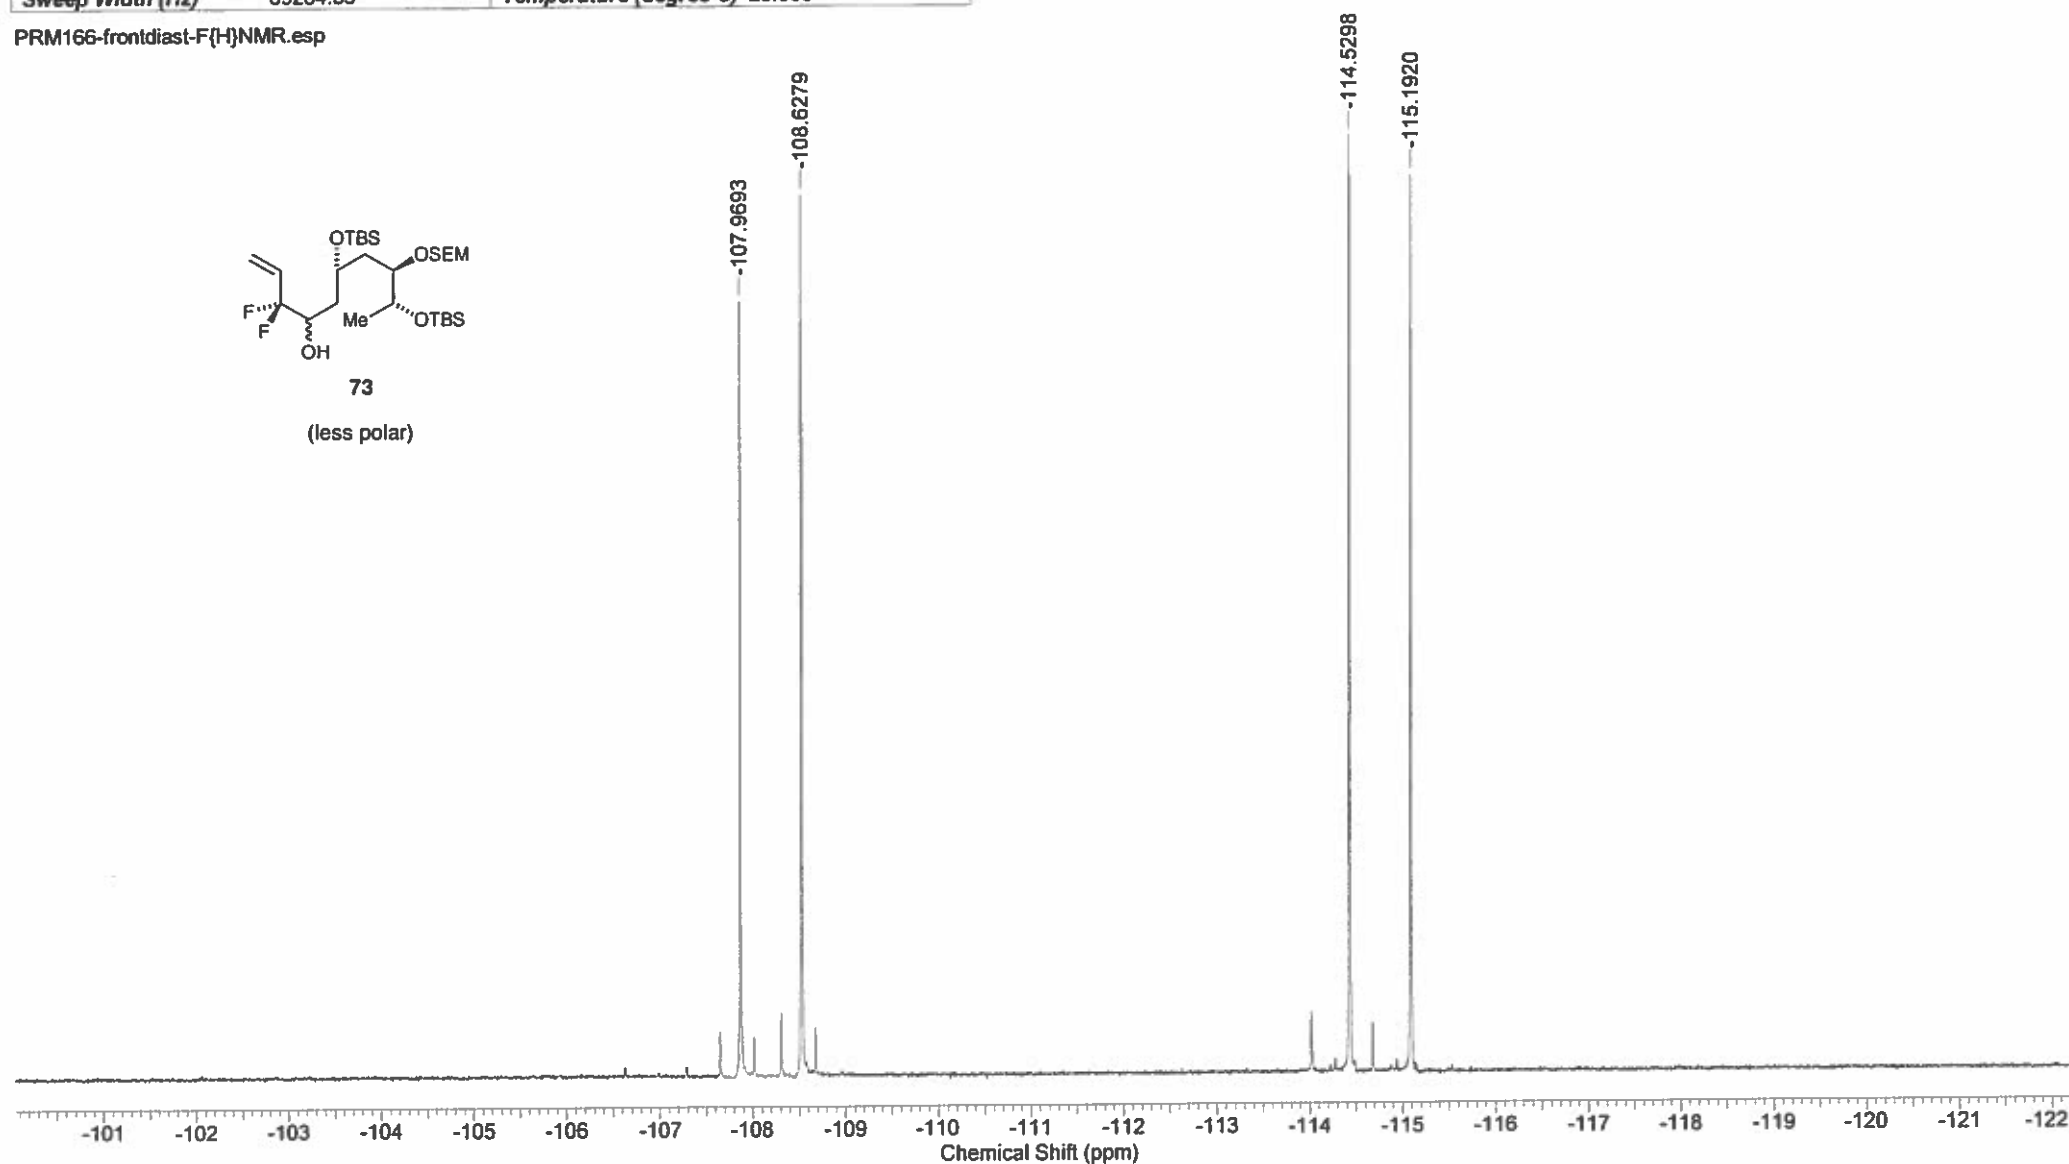

This report was created by ACD/NMR Processor Academic Edition. For more information go to [www.acdlabs.com/nmrproc/](http://www.acdlabs.com/nmrproc/)

|                               |                                                                                                         |                               |                                                                       |                             |           |
|-------------------------------|---------------------------------------------------------------------------------------------------------|-------------------------------|-----------------------------------------------------------------------|-----------------------------|-----------|
| <b>Acquisition Time (sec)</b> | 3.9649                                                                                                  | <b>Comment</b>                | EJT-PRM166 f39-43 40mg mPROTON CDCl3 (e:\bruk400adata\2015Jan) ejt 34 |                             |           |
| <b>Date</b>                   | 16 Jan 2015 11:35:28                                                                                    | <b>Date Stamp</b>             | 16 Jan 2015 11:35:28                                                  |                             |           |
| <b>File Name</b>              | \\ss7a.ds.man.ac.uk\vol5\vol3\users\snmrdata\bruk400adata\2015Jan\data\ejt\nmr\2015-01-16-ejt-34\10\fid |                               |                                                                       | <b>Frequency (MHz)</b>      | 400.13    |
| <b>Nucleus</b>                | 1H                                                                                                      | <b>Number of Transients</b>   | 16                                                                    | <b>Origin</b>               | AV400     |
| <b>Owner</b>                  | nmrsu                                                                                                   | <b>Points Count</b>           | 32768                                                                 | <b>Pulse Sequence</b>       | zg30b     |
| <b>SW(cyclical) (Hz)</b>      | 8264.46                                                                                                 | <b>Solvent</b>                | CHLOROFORM-d                                                          | <b>Spectrum Offset (Hz)</b> | 2464.9272 |
| <b>Sweep Width (Hz)</b>       | 8264.21                                                                                                 | <b>Temperature (degree C)</b> | 23.000                                                                | <b>Spectrum Type</b>        | STANDARD  |

PRM166-reardiast-HNMR.esp

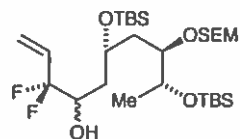

73

(more polar)

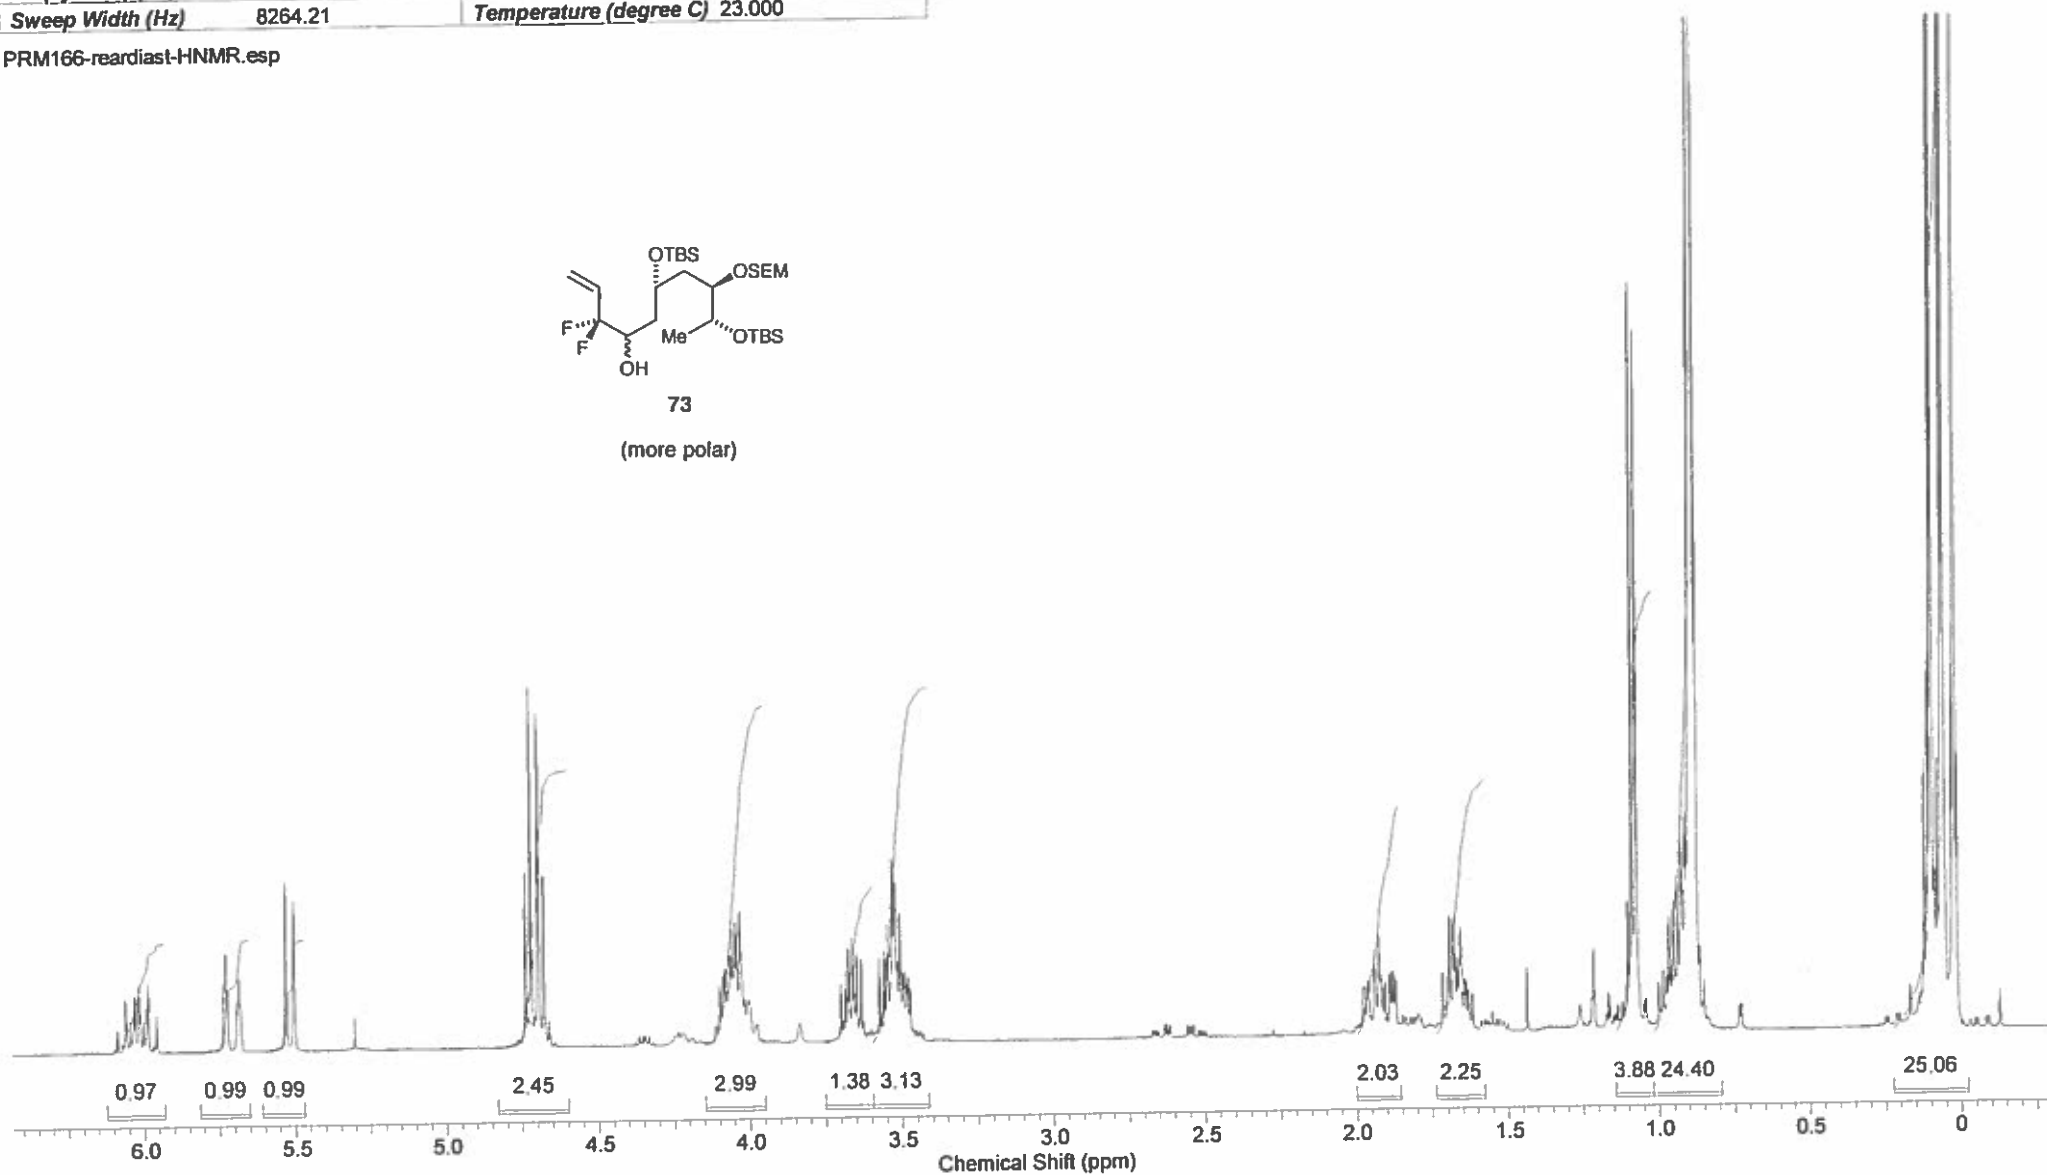

EJT-PRM166 clean rear diastereomer f39-43 40mg

mCARTON: B CDCl3 (e:\bruk400\data\2015\Jan) ejt 56

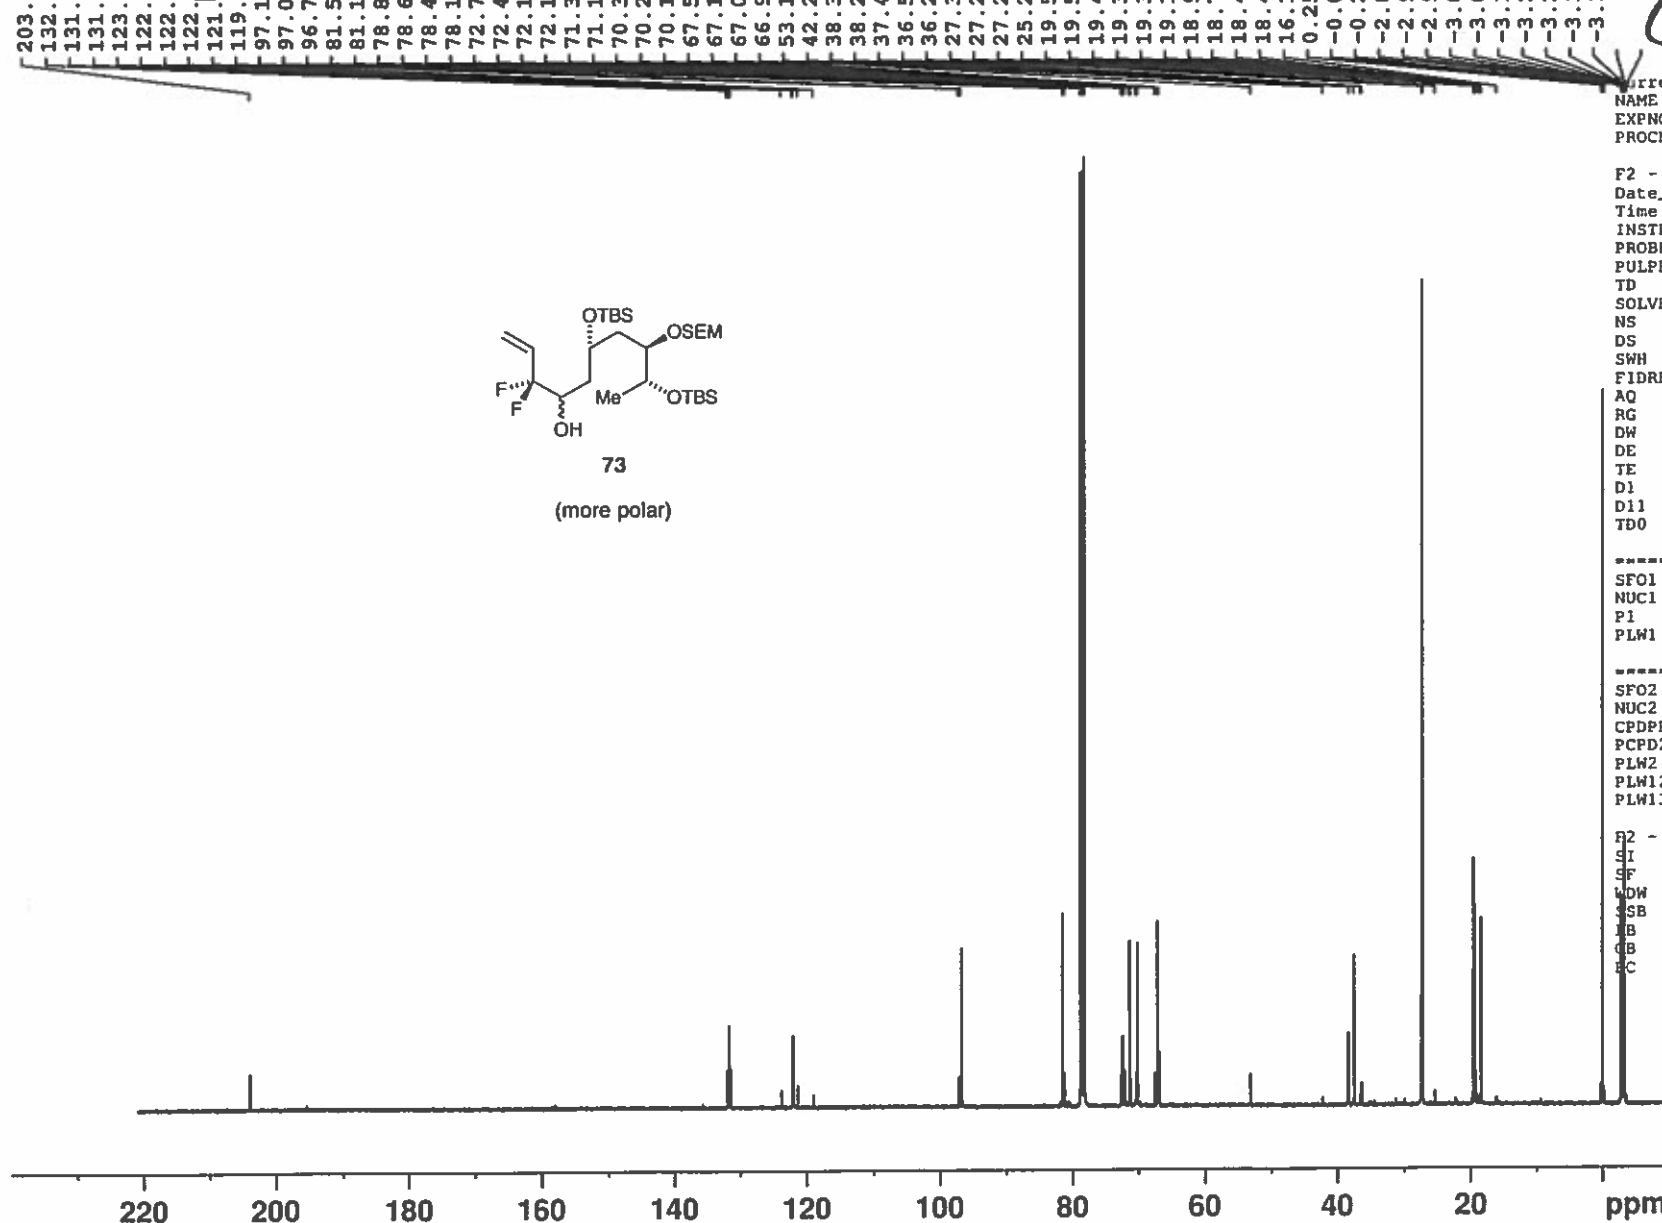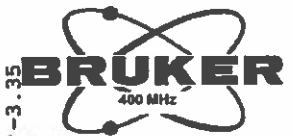

Current Data Parameters  
NAME 2015-01-16-ejt-56  
EXPNO 10  
PROCNO 1

F2 - Acquisition Parameters  
Date\_ 20150116  
Time 22.49  
INSTRUM spect  
PROBHD 5 mm CPPBBO BB  
PULPROG zgpg30  
TD 65536  
SOLVENT CDCl3  
NS 1024  
DS 4  
SWH 24038.461 Hz  
FIDRES 0.366798 Hz  
AQ 1.3631488 sec  
RG 45.2  
DW 20.800 usec  
DE 41.77 usec  
TE 287.5 K  
D1 2.00000000 sec  
D11 0.03000000 sec  
TD0 1

----- CHANNEL f1 -----  
SFO1 100.6077379 MHz  
NUC1 13C  
P1 10.00 usec  
PLW1 33.00000000 W

----- CHANNEL f2 -----  
SFO2 400.0716003 MHz  
NUC2 1H  
CPDPRG[2] waltz16  
PCPD2 80.00 usec  
PLW2 7.40000010 W  
PLW12 0.17209999 W  
PLW13 0.11014000 W

R2 - Processing parameters  
SI 32768  
SF 100.5975375 MHz  
WDW EM  
SSB 0  
LB 1.00 Hz  
GB 0  
PC 1.40

This report was created by ACD/NMR Processor Academic Edition. For more information go to [www.acdlabs.com/nmrproc/](http://www.acdlabs.com/nmrproc/)

|                        |                                                                                                         |                        |                                                                        |                      |             |
|------------------------|---------------------------------------------------------------------------------------------------------|------------------------|------------------------------------------------------------------------|----------------------|-------------|
| Acquisition Time (sec) | 0.7340                                                                                                  | Comment                | EJT-PRM166 f39-43 40mg mF19CPD CDCl3 (e:\bruk400adata\2015\Jan) ejt 34 |                      |             |
| Date                   | 16 Jan 2015 11:39:44                                                                                    | Date Stamp             | 16 Jan 2015 11:39:44                                                   |                      |             |
| File Name              | \ss7a.ds.man.ac.uk\vol5\vol3\users\snmrdata\bruk400adata\2015\Jan\data\ejt\nmr\2015-01-16-ejt-34\12\fid |                        |                                                                        | Frequency (MHz)      | 376.50      |
| Nucleus                | 19F                                                                                                     | Number of Transients   | 16                                                                     | Origin               | AV400       |
| Owner                  | nmrsu                                                                                                   | Points Count           | 65536                                                                  | Pulse Sequence       | zgig        |
| SW(cyclical) (Hz)      | 89285.71                                                                                                | Solvent                | CHLOROFORM-d                                                           | Receiver Gain        | 322.00      |
| Sweep Width (Hz)       | 89284.35                                                                                                | Temperature (degree C) | 23.000                                                                 | Spectrum Offset (Hz) | -37649.5977 |
|                        |                                                                                                         |                        |                                                                        | Spectrum Type        | STANDARD    |

PRM166-reardiast-F(H)NMR.esp

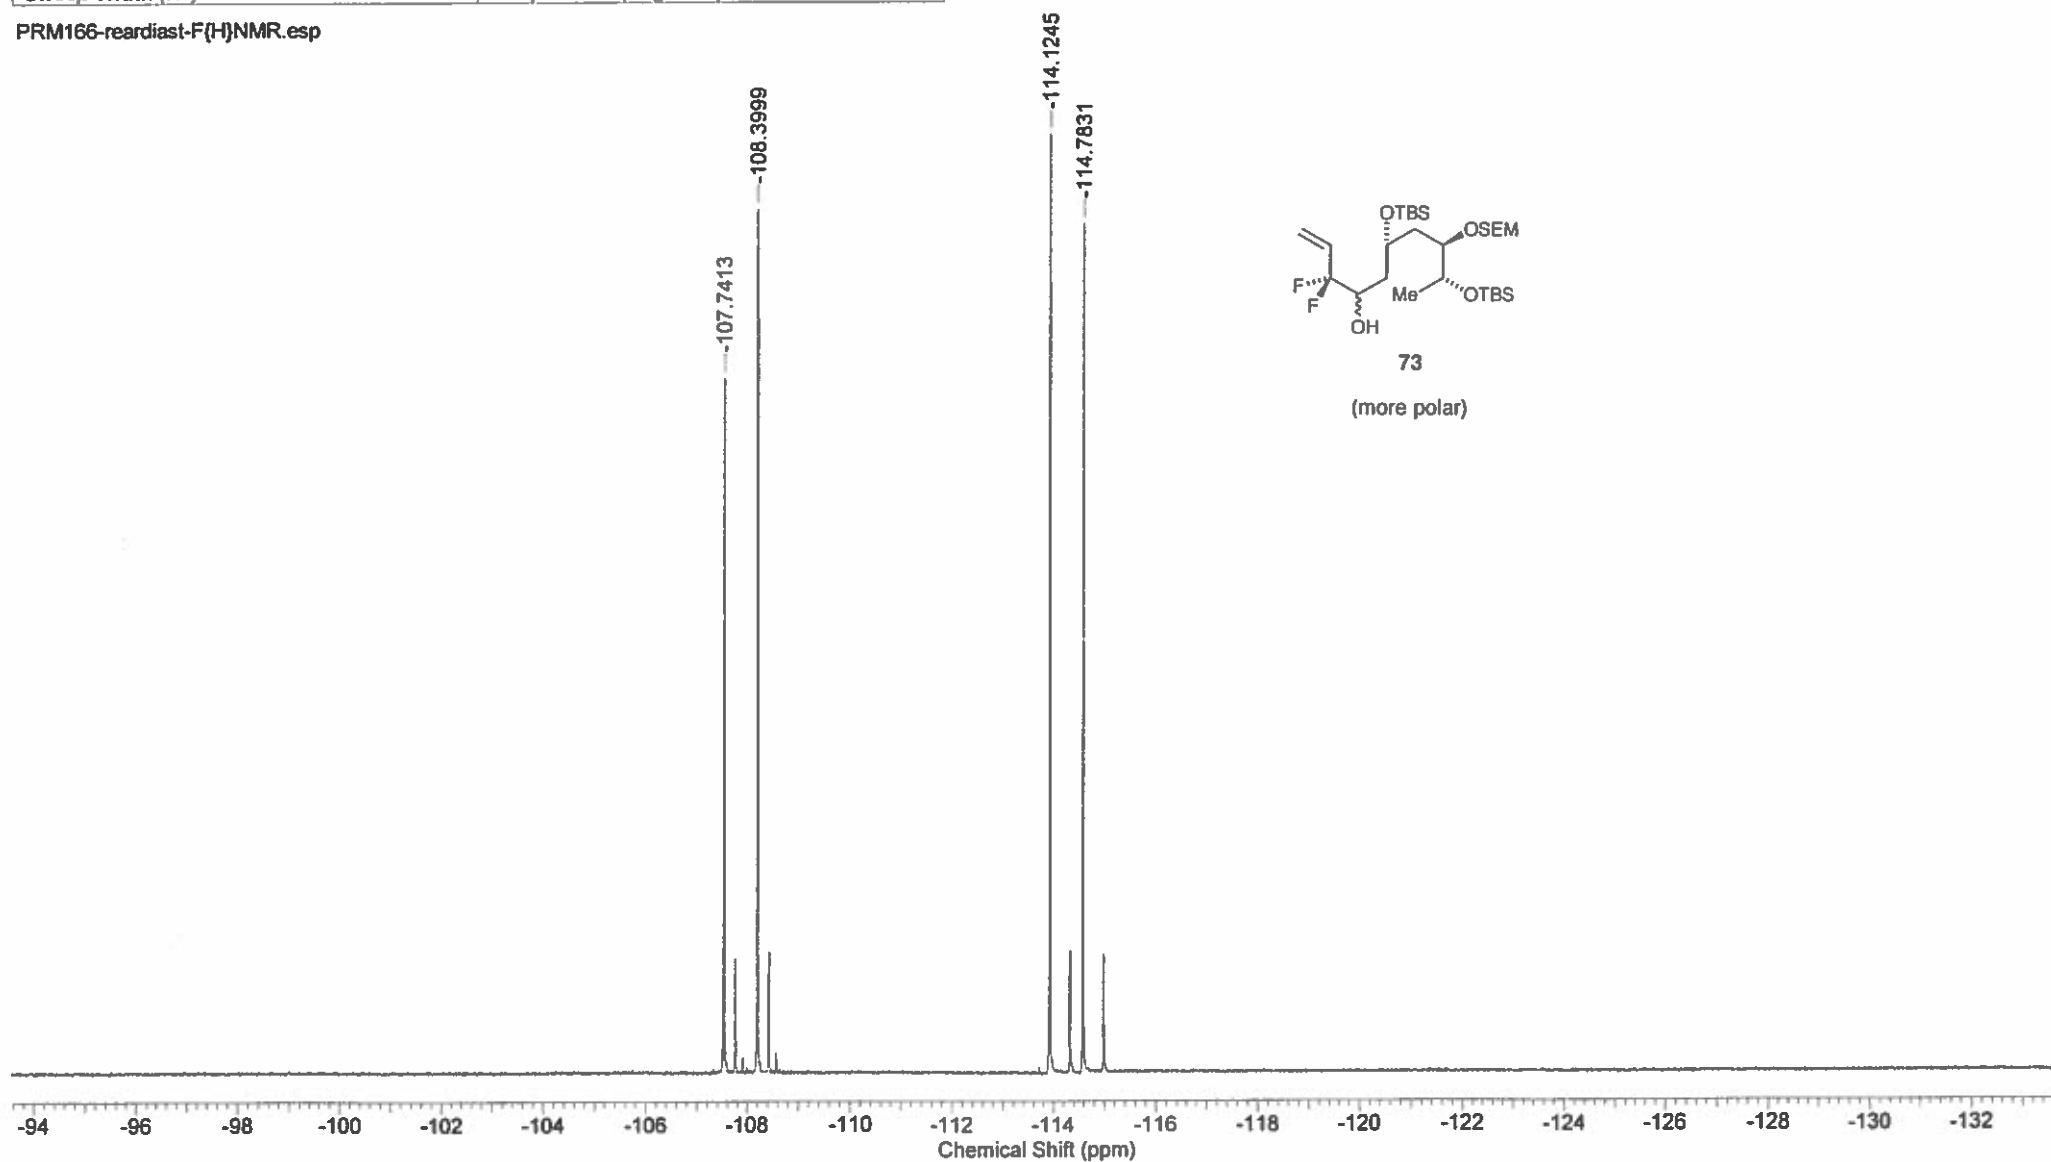

This report was created by ACD/NMR Processor Academic Edition. For more information go to [www.acdlabs.com/nmrproc/](http://www.acdlabs.com/nmrproc/)

|                                                                |                                                                                                         |                        |              |                                                                       |                      |                       |          |  |
|----------------------------------------------------------------|---------------------------------------------------------------------------------------------------------|------------------------|--------------|-----------------------------------------------------------------------|----------------------|-----------------------|----------|--|
| This report was created by ACD/NMR PROCESSOR: Academic License |                                                                                                         |                        |              |                                                                       |                      |                       |          |  |
| Acquisition Time (sec)                                         | 3.9649                                                                                                  | Comment                |              | EJT-PRM167 f8-22 47mg mPROTON CDCl3 (e:\bruk400adata\2014\Dec) ejt 59 |                      |                       |          |  |
| Date                                                           | 18 Dec 2014 14:13:20                                                                                    |                        | Date Stamp   |                                                                       | 18 Dec 2014 14:13:20 |                       |          |  |
| File Name                                                      | \ss7a.ds.man.ac.uk\vol5\vol3\users\snmrdata\bruk400adata\2014\Dec\data\ejt\nmr\2014-12-18-ejt-59\10\fid |                        |              |                                                                       | Frequency (MHz)      | 400.13                |          |  |
| Nucleus                                                        | 1H                                                                                                      | Number of Transients   | 16           | Origin                                                                | AV400                | Original Points Count | 32768    |  |
| Owner                                                          | nmrsu                                                                                                   | Points Count           | 32768        | Pulse Sequence                                                        | zg30b                | Receiver Gain         | 90.50    |  |
| SW (cyclical) (Hz)                                             | 8264.46                                                                                                 | Solvent                | CHLOROFORM-d | Spectrum Offset (Hz)                                                  | 2464.9270            | Spectrum Type         | STANDARD |  |
| Sweep Width (Hz)                                               | 8264.21                                                                                                 | Temperature (degree C) | 23.000       |                                                                       |                      |                       |          |  |

PRM167-HNMR.esp

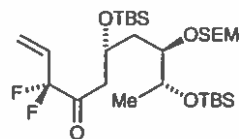

74

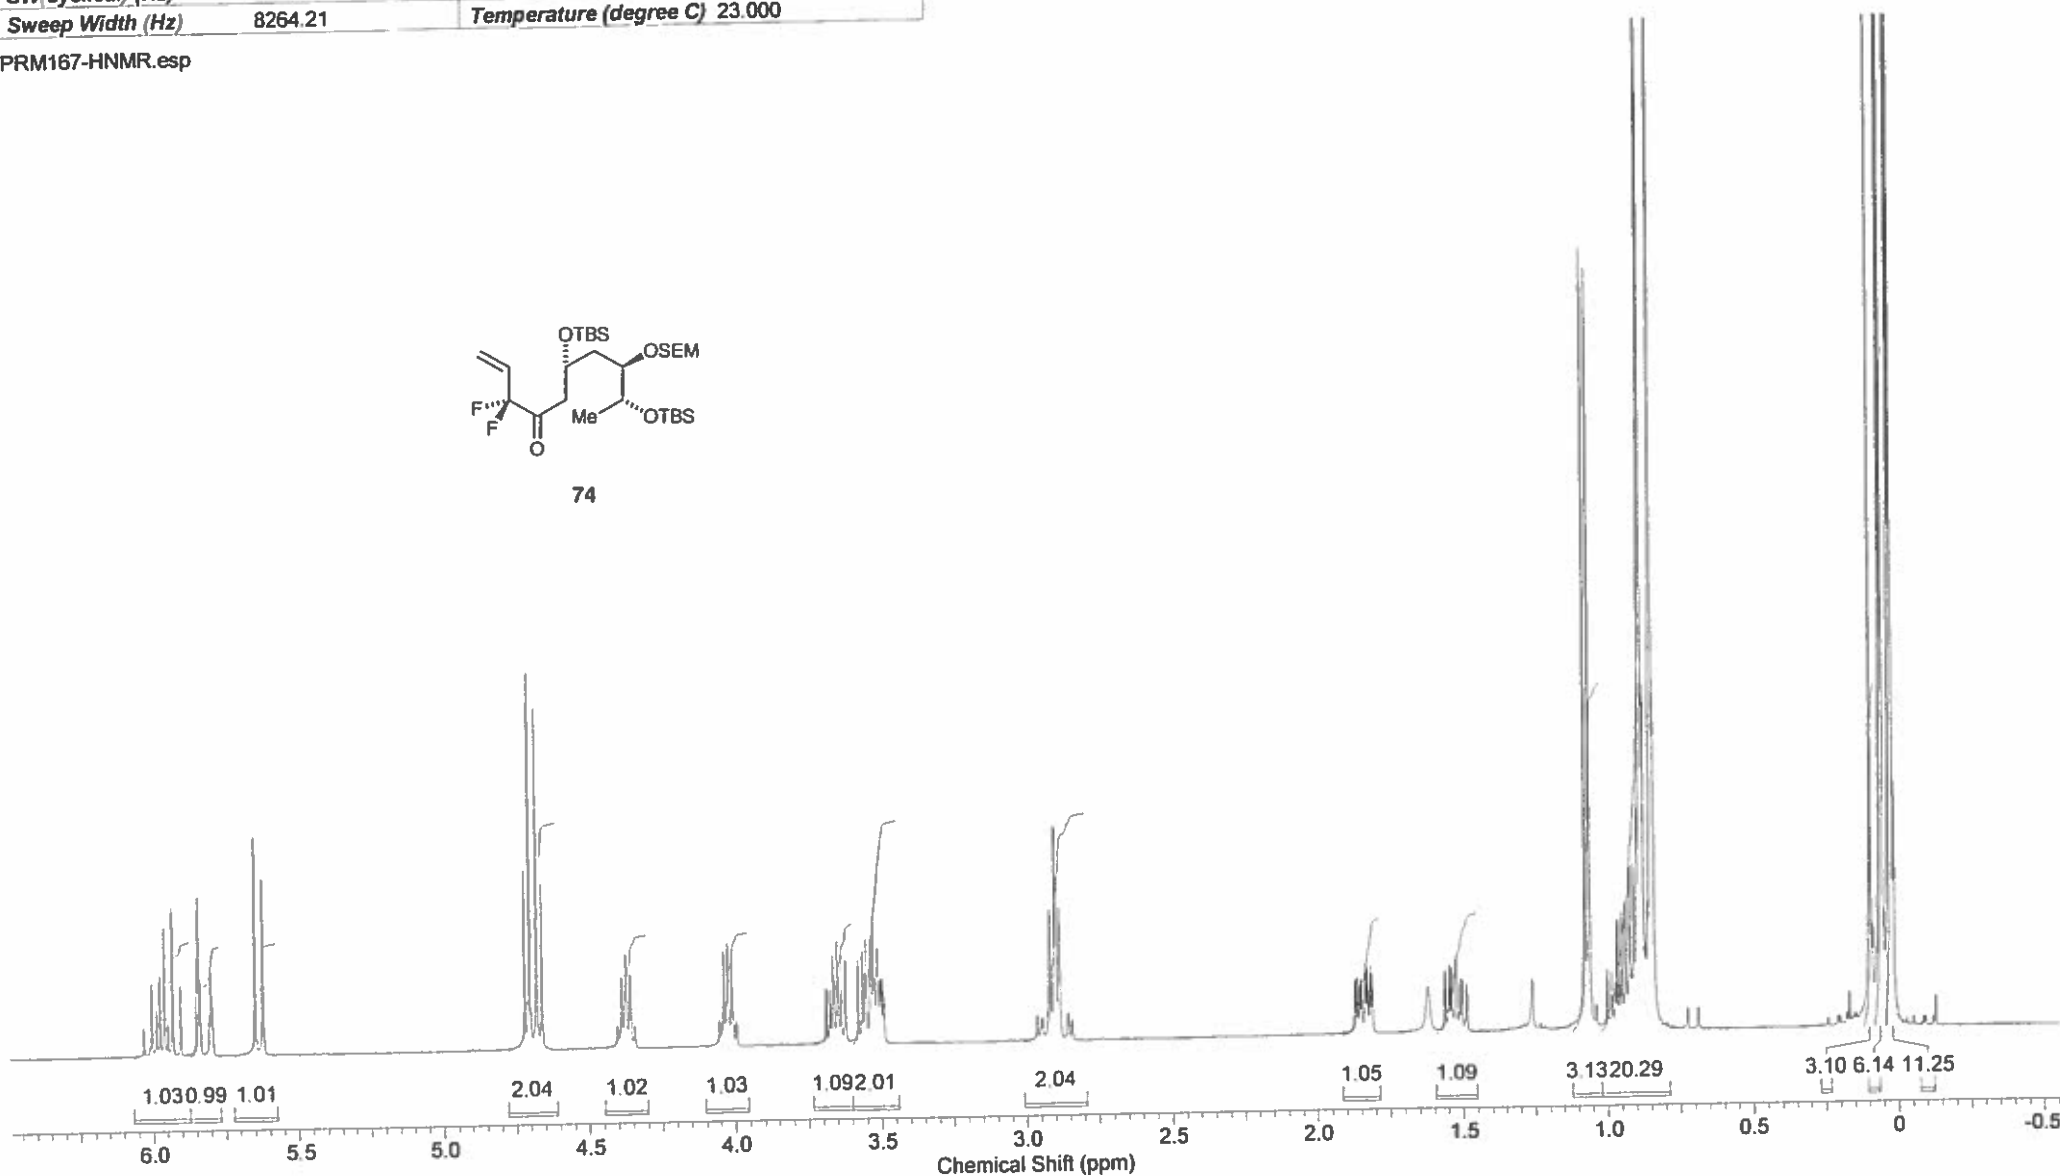

EJT-PRM167 f8-22 47mg  
mCARBON\_B CDC13 {e:\bruk400cdata\2014\Dec\ejt-3

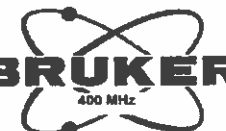

199.8  
199.8  
199.8

130.8  
129.8  
129.8  
124.4  
124.4  
124.4  
118.8  
115.1  
113.1

96.97  
81.20  
80.26  
78.79  
78.68  
78.47  
78.16  
70.53  
70.36  
67.49  
66.92

46.69  
38.32  
31.17  
27.33  
27.29  
19.82  
19.58  
19.51  
19.38  
19.18  
19.04  
18.55  
0.25  
-0.00

Current Data Parameters  
NAME 2014-12-18-ejt-3  
EXPNO 10  
PROCNO 1

F2 - Acquisition Parameters  
Date\_ 20141218  
Time 22.00  
INSTRUM spect  
PROBHD 5 mm CPPBBO BB  
PULPROG zgpg30  
TD 65536  
SOLVENT CDC13  
NS 1024  
DS 4  
SWH 24038.461 Hz  
FIDRES 0.366798 Hz  
AQ 1.3631488 sec  
RG 45.2  
DW 20.800 usec  
DE 41.77 usec  
TE 296.1 K  
D1 2.00000000 sec  
D11 0.03000000 sec  
TD0 1

----- CHANNEL f1 -----  
SFO1 100.6077379 MHz  
NUC1 13C  
P1 10.00 usec  
PLW1 33.00000000 W

----- CHANNEL f2 -----  
SFO2 400.0716003 MHz  
NUC2 1H  
CPDPRG2 waltz16  
PCPD2 80.00 usec  
PLW2 7.40000010 W  
PLW12 0.17209999 W  
PLW13 0.11014000 W

F2 - Processing parameters  
SI 32768  
SF 100.5975350 MHz  
WDW EM  
SSB 0  
LB 1.00 Hz  
GB 0  
HC 1.40

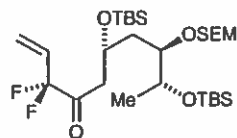

74

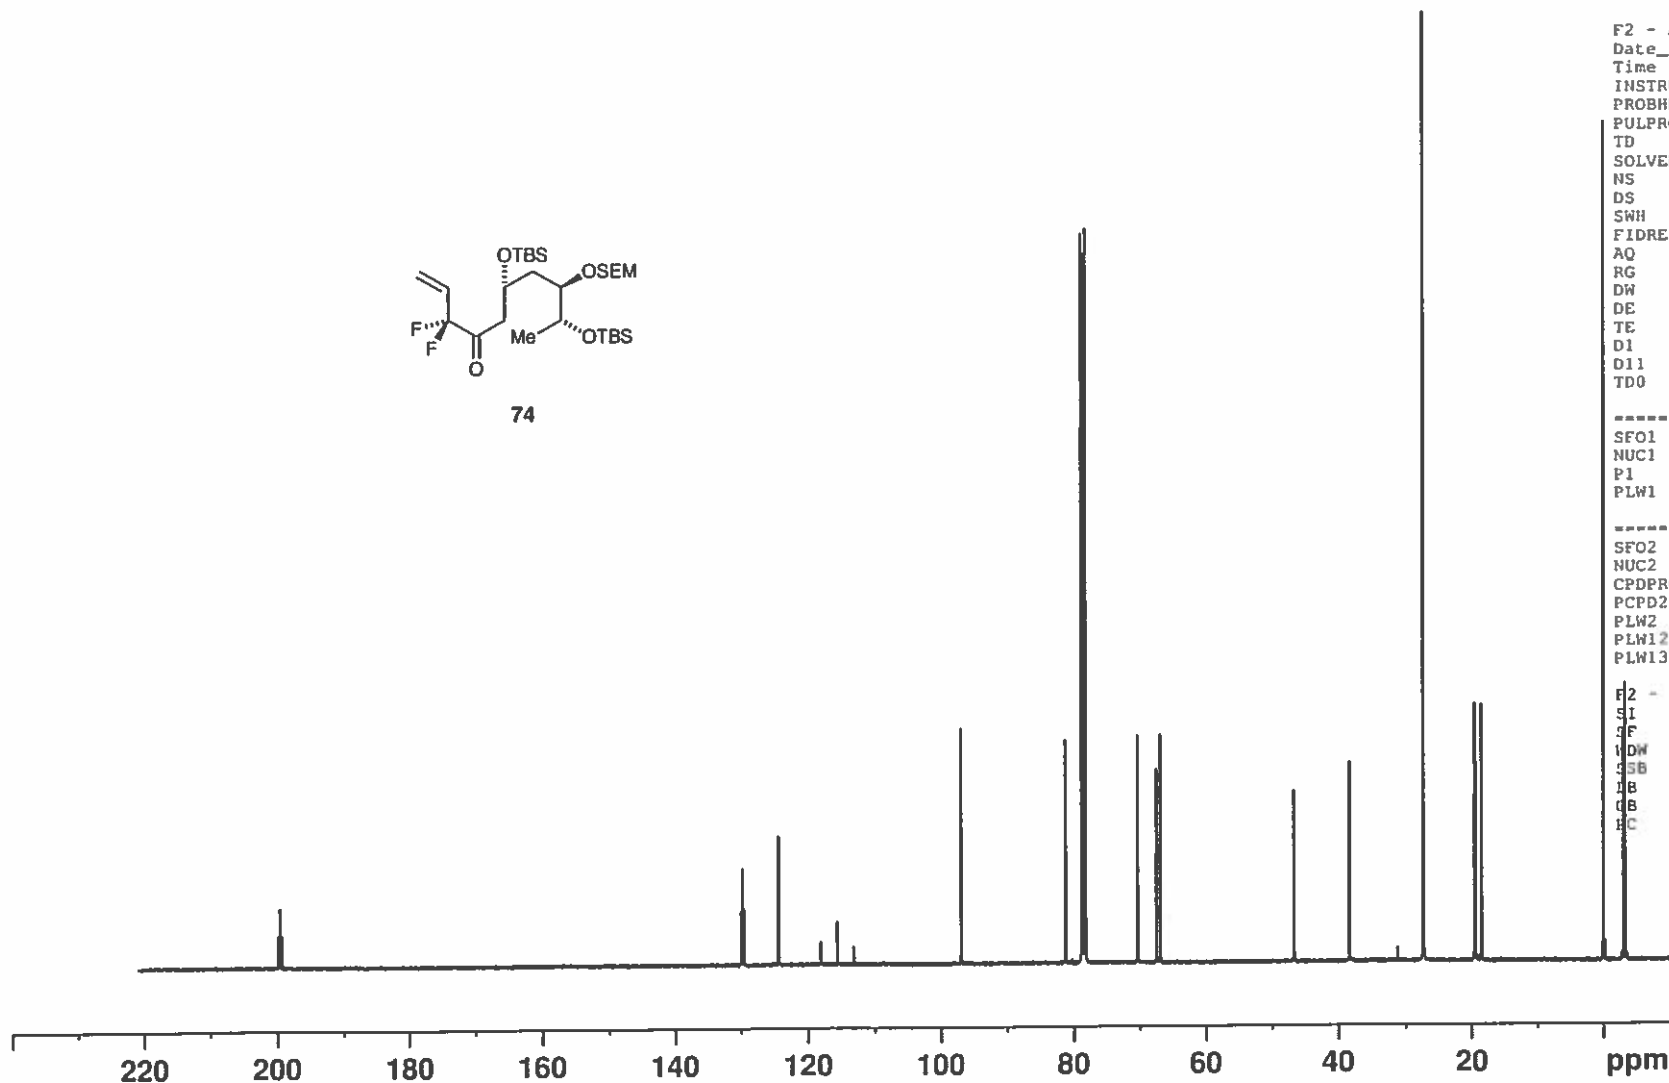



This report was created by ACD/NMR Processor Academic Edition. For more information go to [www.acdlabs.com/nmrproc/](http://www.acdlabs.com/nmrproc/)

|                        |                                                                                                         |                        |                                                                       |                      |             |
|------------------------|---------------------------------------------------------------------------------------------------------|------------------------|-----------------------------------------------------------------------|----------------------|-------------|
| Acquisition Time (sec) | 0.7340                                                                                                  | Comment                | EJT-PRM167 f8-22 47mg mF19CPD CDCl3 (e:\bruk400adata\2014\Dec) ejt 59 |                      |             |
| Date                   | 18 Dec 2014 14:17:36                                                                                    | Date Stamp             | 18 Dec 2014 14:17:36                                                  |                      |             |
| File Name              | \ss7a.ds.man.ac.uk\vol5\vol3\users\snmrdata\bruk400adata\2014\Dec\data\ejt\nmr\2014-12-18-ejt-59\12\fid |                        |                                                                       | Frequency (MHz)      | 376.50      |
| Nucleus                | 19F                                                                                                     | Number of Transients   | 16                                                                    | Origin               | AV400       |
| Owner                  | nmrsu                                                                                                   | Points Count           | 65536                                                                 | Pulse Sequence       | zgig        |
| SW(cyclical) (Hz)      | 89285.71                                                                                                | Solvent                | CHLOROFORM-d                                                          | Spectrum Offset (Hz) | -37649.5977 |
| Sweep Width (Hz)       | 89284.35                                                                                                | Temperature (degree C) | 27.000                                                                | Spectrum Type        | STANDARD    |

PRM167-F(H)NMR.esp

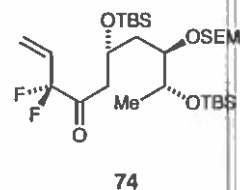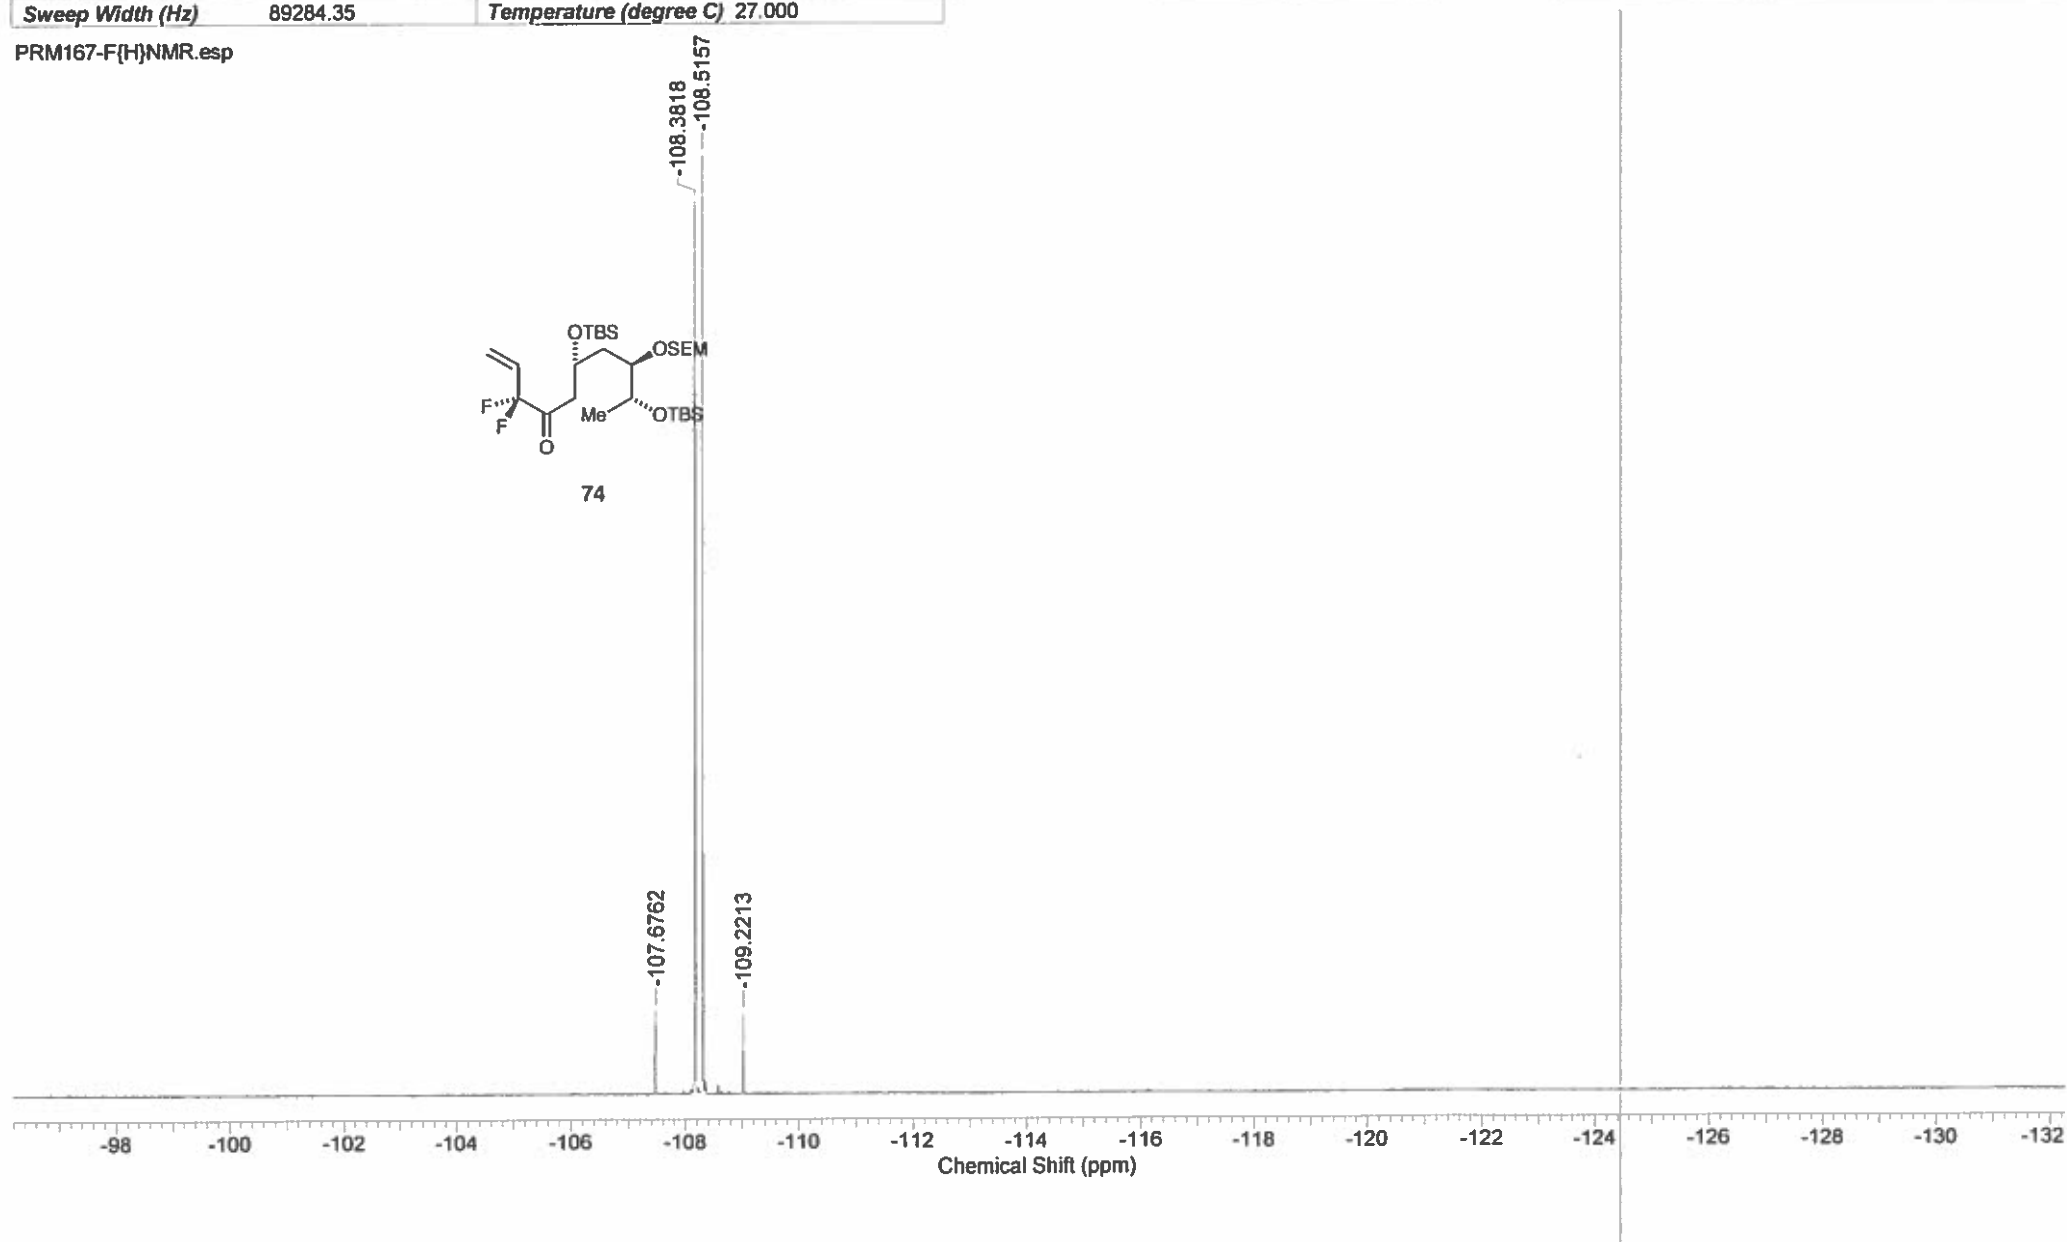

This report was created by ACD/NMR Processor Academic Edition. For more information go to [www.acdlabs.com/nmrproc/](http://www.acdlabs.com/nmrproc/)

This report was created by ACD/NMR Processor Academic Edition. For more information go to [www.acdlabs.com/nmr/proc](http://www.acdlabs.com/nmr/proc)

|                        |                                                                                                         |                        |                                                                       |                      |           |                       |          |
|------------------------|---------------------------------------------------------------------------------------------------------|------------------------|-----------------------------------------------------------------------|----------------------|-----------|-----------------------|----------|
| Acquisition Time (sec) | 4.0894                                                                                                  | Comment                | EJT-PRM168 f7-9 38mg mPROTON A CDCl3 (e:\bruk400cdata\2015Jan) ejt 10 |                      |           |                       |          |
| Date                   | 07 Jan 2015 16:34:08                                                                                    |                        | Date Stamp                                                            | 07 Jan 2015 16:34:08 |           |                       |          |
| File Name              | \\ss7a.ds.man.ac.uk\vol5\vol3\users\snmrdata\bruk400cdata\2015Jan\data\ejt\nmr\2015-01-07-ejt-10\10\vid |                        |                                                                       |                      |           |                       |          |
| Nucleus                | <sup>1</sup> H                                                                                          | Number of Transients   | 16                                                                    | Origin               | spect     | Frequency (MHz)       | 400.07   |
| Owner                  | nmrsu                                                                                                   | Points Count           | 32768                                                                 | Pulse Sequence       | zg30      | Original Points Count | 32768    |
| SW(cyclical) (Hz)      | 8012.82                                                                                                 | Solvent                | CHLOROFORM-d                                                          | Spectrum Offset (Hz) | 1894.5574 | Receiver Gain         | 64.00    |
| Sweep Width (Hz)       | 8012.58                                                                                                 | Temperature (degree C) | 23.150                                                                |                      |           | Spectrum Type         | STANDARD |

PRM168-HNMR.esp

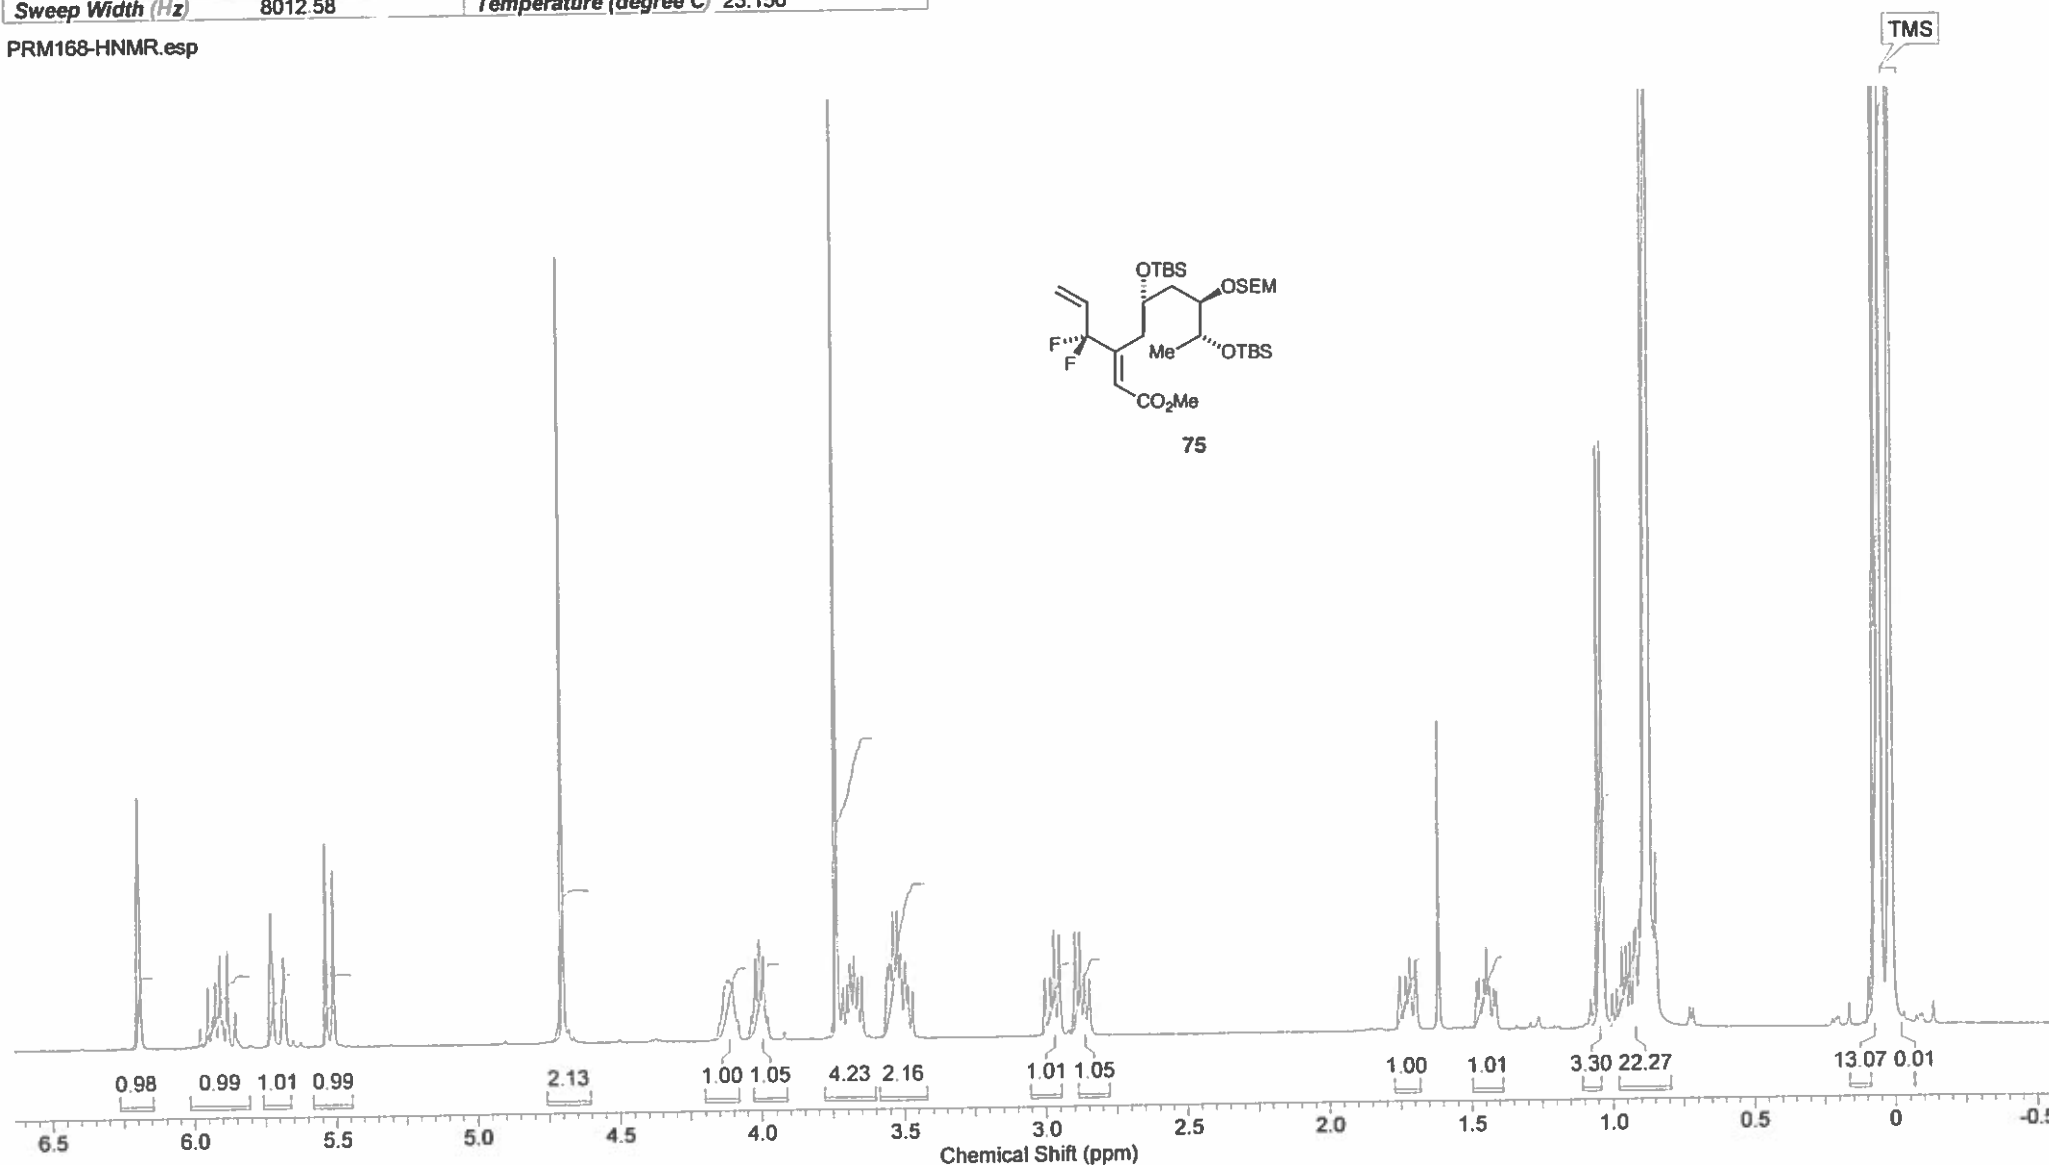

EJT-PRM168 Prod data

13C NMR of compound 75 in CDCl3 (Bruker 400cdata\2015\Jan\ejt-26

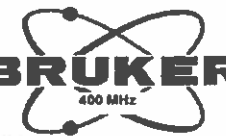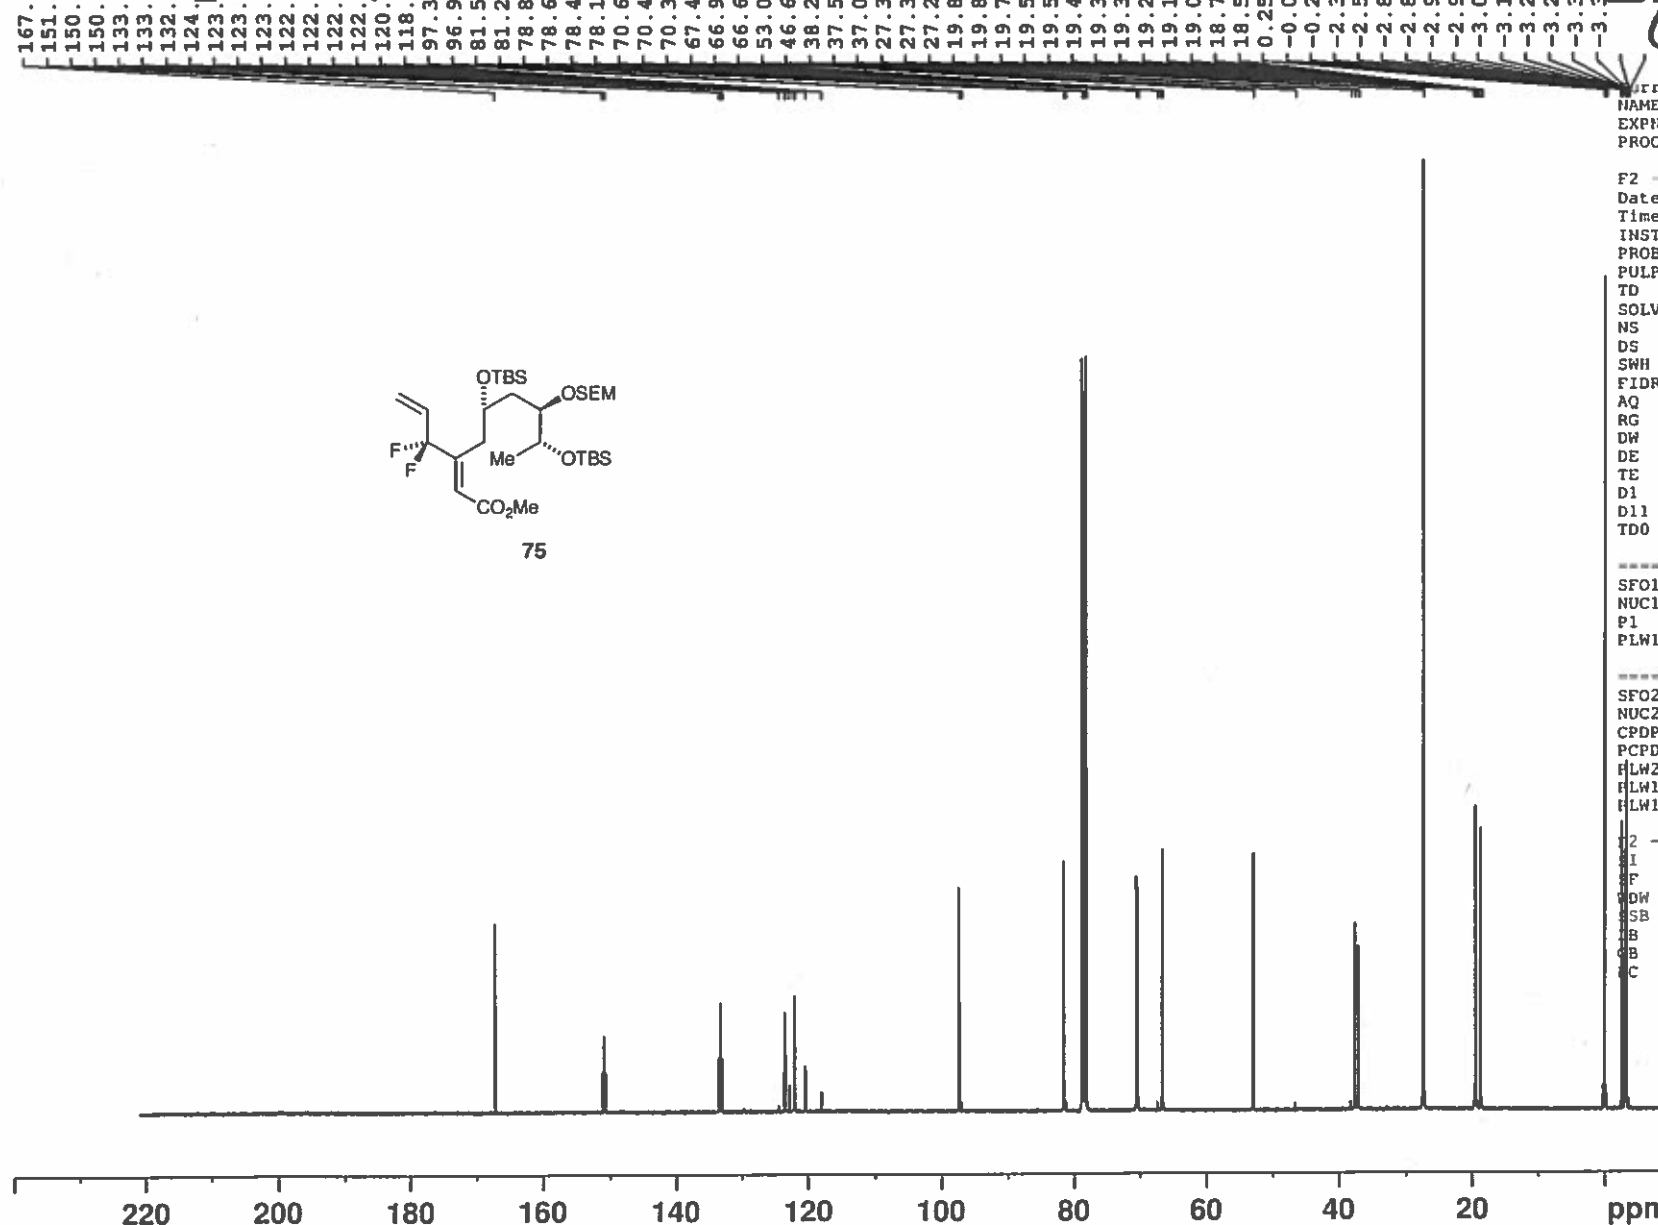

Current Data Parameters  
NAME 2015-01-11-ejt-26  
EXPNO 11  
PROCNO 1

F2 - Acquisition Parameters  
Date\_ 20150112  
Time 19.11  
INSTRUM spect  
PROBHD 5 mm CPPBBO BB  
PULPROG zgpg30  
TD 65536  
SOLVENT CDCl3  
NS 1024  
DS 4  
SWH 24038.461 Hz  
FIDRES 0.366798 Hz  
AQ 1.3631488 sec  
RG 71.8  
DW 20.800 usec  
DE 41.77 usec  
TE 288.3 K  
D1 2.00000000 sec  
D11 0.03000000 sec  
TDO 1

===== CHANNEL f1 =====  
SFO1 100.6077379 MHz  
NUC1 13C  
P1 10.00 usec  
PLW1 33.00000000 W

===== CHANNEL f2 =====  
SFO2 400.0716003 MHz  
NUC2 1H  
CPDPRG2 waltz16  
PCPD2 80.00 usec  
PLW2 7.40000010 W  
PLW12 0.17209999 W  
PLW13 0.11014000 W

F2 - Processing parameters  
SI 32768  
SF 100.5975370 MHz  
WDW EM  
SSB 0  
GB 1.00 Hz  
CB 0  
SC 1.40

This report was created by ACD/NMR Processor Academic Edition. For more information go to [www.acdlabs.com/nmrproc/](http://www.acdlabs.com/nmrproc/)

|                        |                                                                                                         |                        |                                                                         |                      |             |
|------------------------|---------------------------------------------------------------------------------------------------------|------------------------|-------------------------------------------------------------------------|----------------------|-------------|
| Acquisition Time (sec) | 0.7340                                                                                                  | Comment                | EJT-PRM169 f17-33 124mg mF19CPD CDCl3 (e:\bruk400adata\2015\Jan) ejt 29 |                      |             |
| Date                   | 10 Jan 2015 15:32:16                                                                                    | Date Stamp             | 10 Jan 2015 15:32:16                                                    |                      |             |
| File Name              | \ss7a.ds.man.ac.uk\vol5\vol3\users\snmrdata\bruk400adata\2015\Jan\data\ejt\nmr\2015-01-10-ejt-29\12\fid |                        |                                                                         | Frequency (MHz)      | 376.50      |
| Nucleus                | 19F                                                                                                     | Number of Transients   | 16                                                                      | Origin               | AV400       |
| Owner                  | nmrsu                                                                                                   | Points Count           | 65536                                                                   | Pulse Sequence       | zgig        |
| SW(cyclical) (Hz)      | 89285.71                                                                                                | Solvent                | CHLOROFORM-d                                                            | Spectrum Offset (Hz) | -37649.5977 |
| Sweep Width (Hz)       | 89284.35                                                                                                | Temperature (degree C) | 23.000                                                                  | Spectrum Type        | STANDARD    |

PRM168-F(H)NMR.esp

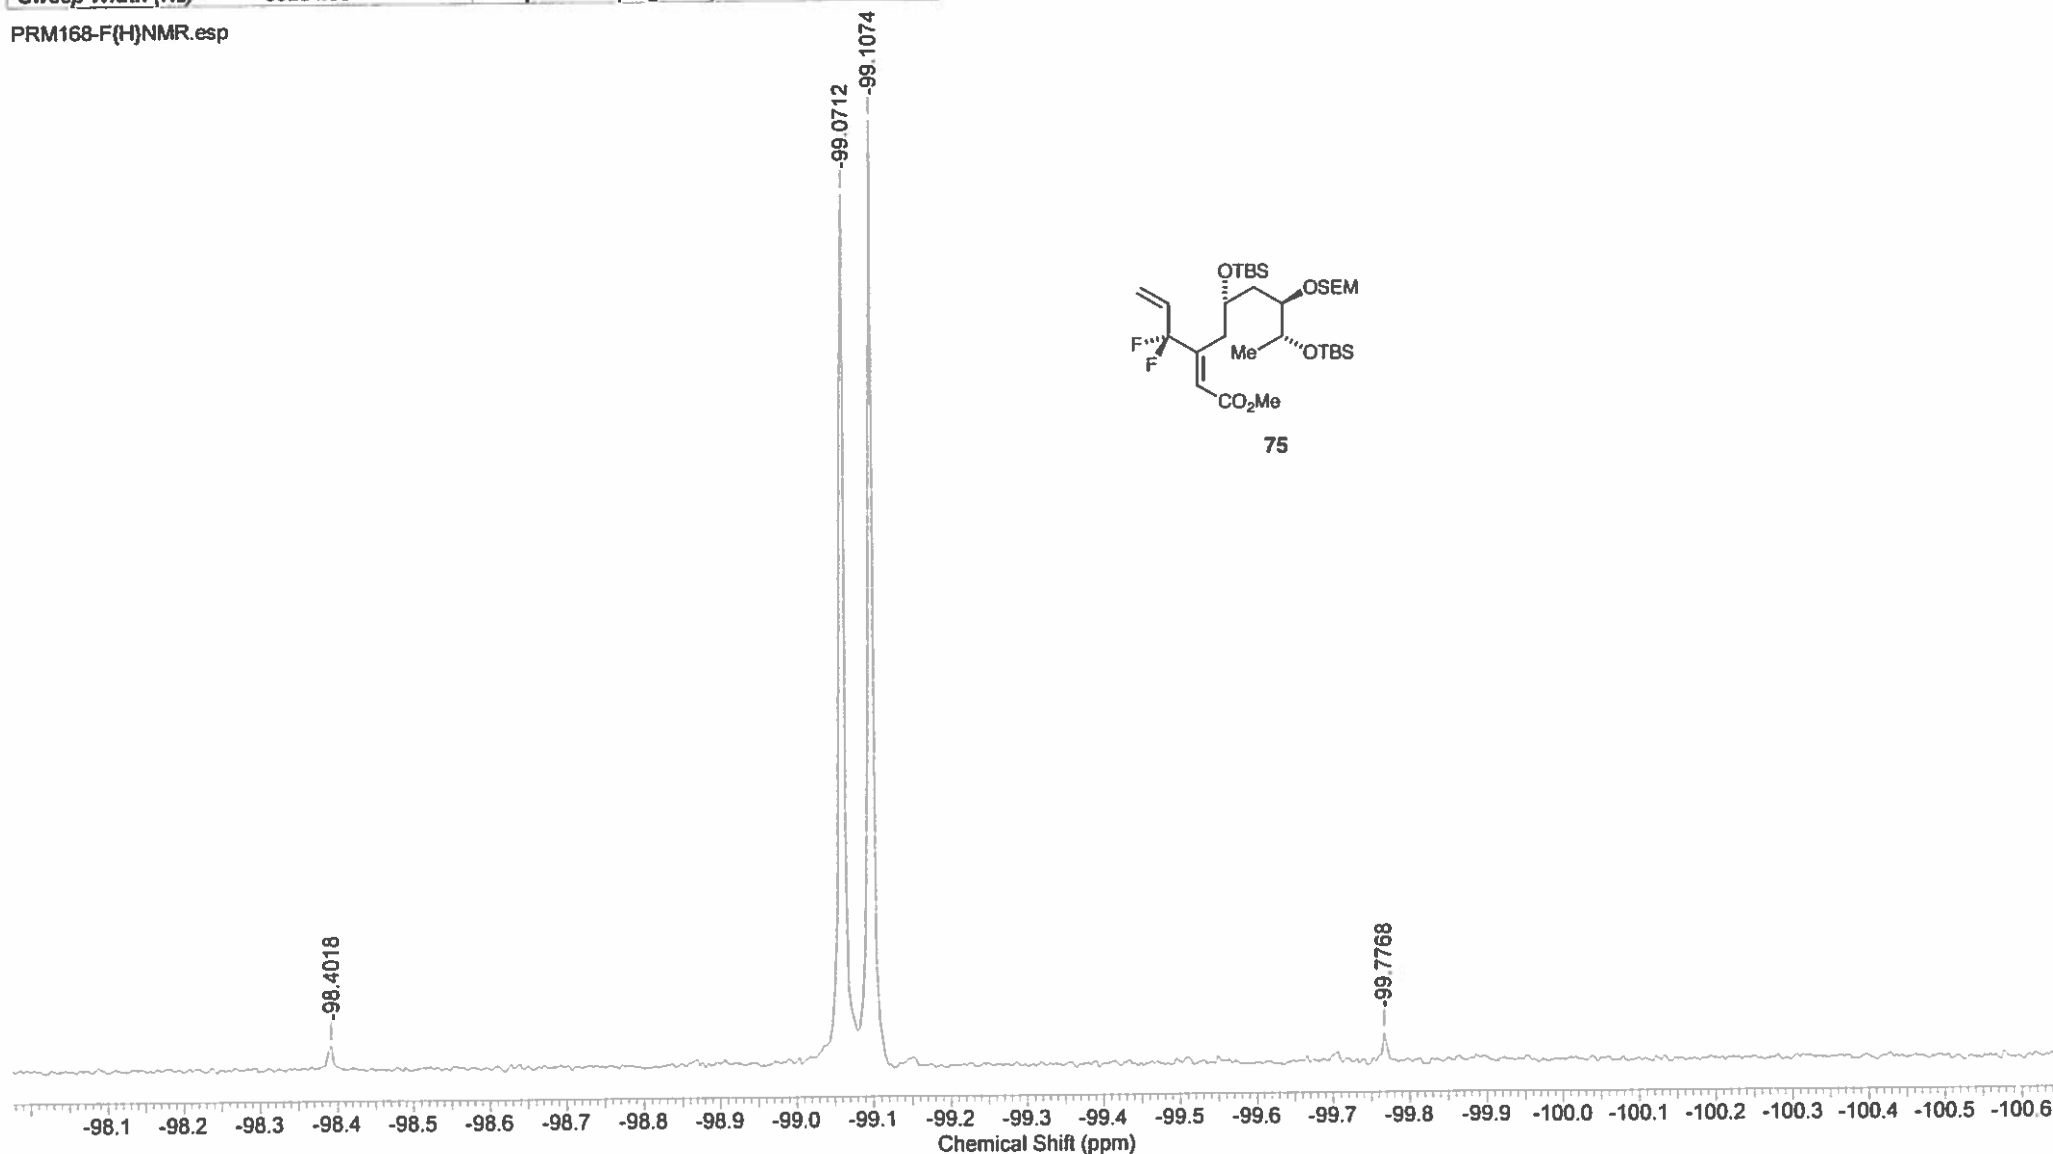

This report was created by ACD/NMR Processor Academic Edition. For more information go to [www.acdlabs.com/nmrproc/](http://www.acdlabs.com/nmrproc/)

|                        |                                                                                                         |                        |                                                                        |                      |           |
|------------------------|---------------------------------------------------------------------------------------------------------|------------------------|------------------------------------------------------------------------|----------------------|-----------|
| Acquisition Time (sec) | 3.1719                                                                                                  | Comment                | EJT-PRM169 f28-36 44mg mPROTON CDC13 (E:\bruk500adata\2015\Jan) ejt 10 |                      |           |
| Date                   | 12 Jan 2015 13:05:04                                                                                    | Date Stamp             | 12 Jan 2015 13:05:04                                                   |                      |           |
| File Name              | \\ss7a.ds.man.ac.uk\vol5\vol3\users\snmrdata\bruk500adata\2015\Jan\data\ejt\nmr\2015-01-12-ejt-10\20Vid |                        |                                                                        | Frequency (MHz)      | 500.13    |
| Nucleus                | <sup>1</sup> H                                                                                          | Number of Transients   | 16                                                                     | Origin               | spect     |
| Owner                  | nmrsu                                                                                                   | Points Count           | 32768                                                                  | Pulse Sequence       | zg30      |
| SW(cyclical) (Hz)      | 10330.58                                                                                                | Solvent                | CHLOROFORM-d                                                           | Spectrum Offset (Hz) | 3081.5532 |
| Sweep Width (Hz)       | 10330.26                                                                                                | Temperature (degree C) | 20.400                                                                 | Spectrum Type        | STANDARD  |

PRM169-HNMR.esp

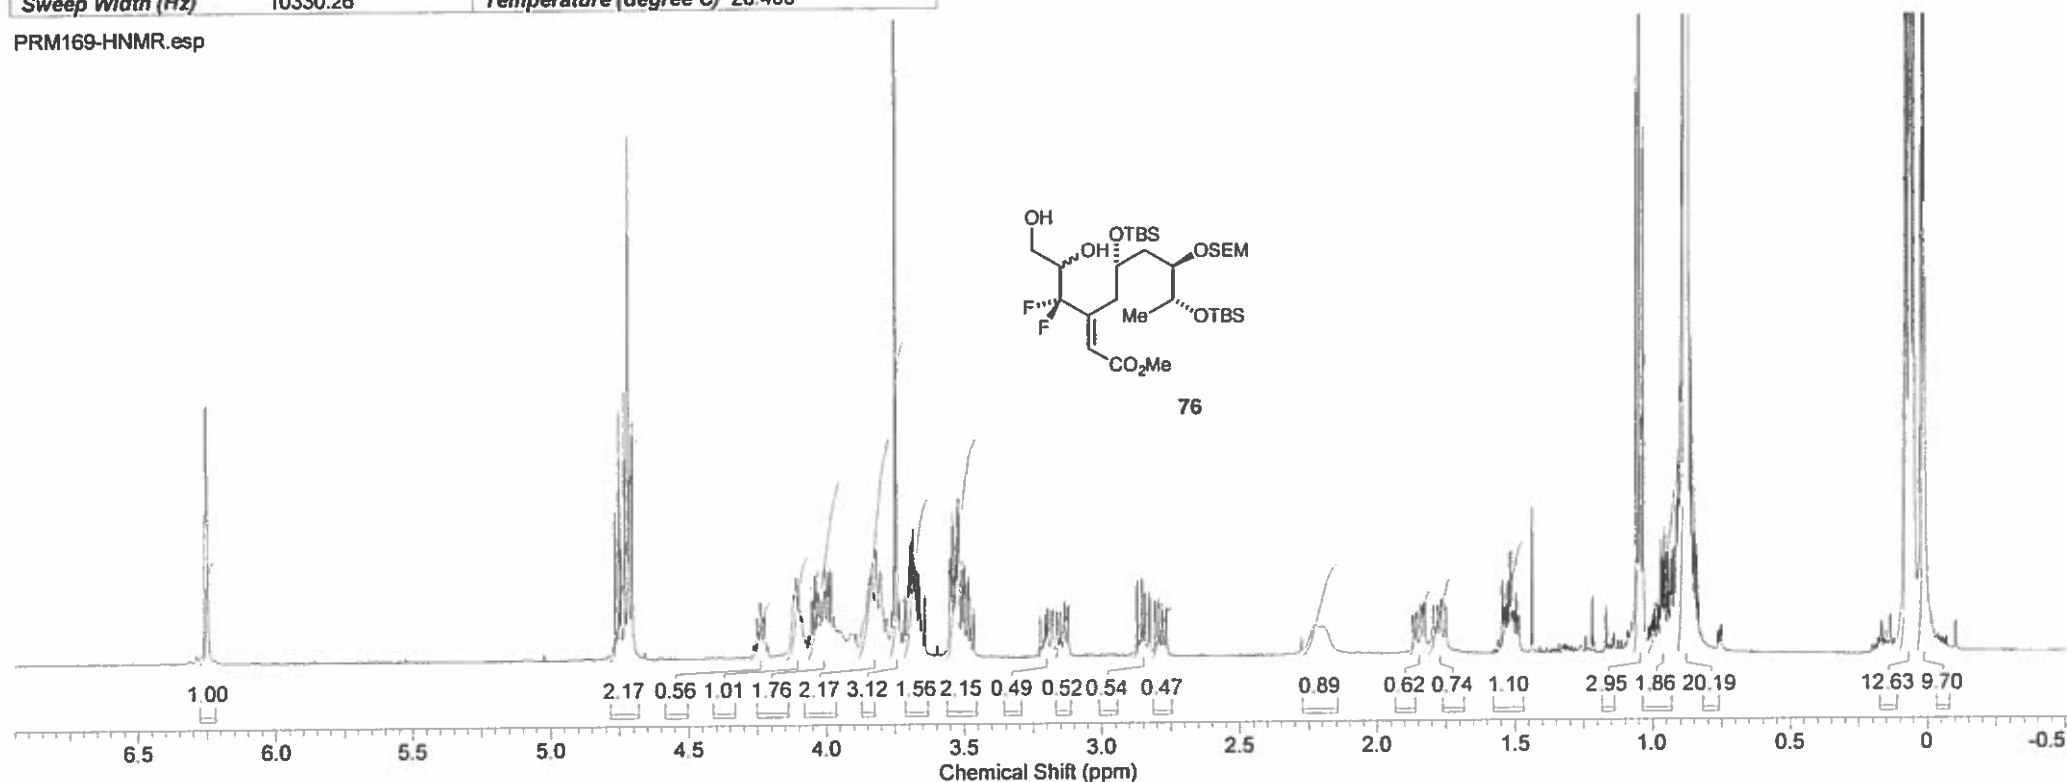

| No. | (ppm)                  | Value          | Absolute Value | Non-Negative Value | No. | (ppm)                  | Value         | Absolute Value | Non-Negative Value |
|-----|------------------------|----------------|----------------|--------------------|-----|------------------------|---------------|----------------|--------------------|
| 1   | 0087 .. 0.039.70469666 | 1.55986125e+10 | 9.70469666     |                    | 12  | 1107 .. 3.160.51732343 | 8.31507520e+8 | 0.51732343     |                    |
| 2   | 0363 .. 0.102.63145828 | 2.03028726e+10 | 12.63145828    |                    | 13  | 1687 .. 3.230.49489146 | 7.95451968e+8 | 0.49489146     |                    |
| 3   | 0486 .. 0.900.18981934 | 3.24516250e+10 | 20.18981934    |                    | 14  | 4552 .. 3.562.15453339 | 3.46303770e+9 | 2.15453339     |                    |
| 4   | 0102 .. 1.011.85710049 | 2.98496614e+9  | 1.85710049     |                    | 15  | 5323 .. 3.711.56468415 | 2.51495782e+9 | 1.56468415     |                    |
| 5   | 0235 .. 1.062.95424557 | 4.74843597e+9  | 2.95424557     |                    | 16  | 7205 .. 3.763.11513853 | 5.00704358e+9 | 3.11513853     |                    |
| 6   | 0679 .. 1.571.09587038 | 1.76142106e+9  | 1.09587038     |                    | 17  | 7679 .. 3.882.17377329 | 3.49396250e+9 | 2.17377329     |                    |
| 7   | 7343 .. 1.800.74124676 | 1.19142528e+9  | 0.74124676     |                    | 18  | 9501 .. 4.061.75517964 | 2.82114611e+9 | 1.75517964     |                    |
| 8   | 3096 .. 1.880.62363493 | 1.00238470e+9  | 0.62363493     |                    | 19  | 0657 .. 4.141.01384950 | 1.62958682e+9 | 1.01384950     |                    |
| 9   | 1451 .. 2.270.89462709 | 1.43795750e+9  | 0.89462709     |                    | 20  | 1993 .. 4.280.56165135 | 9.02756928e+8 | 0.56165135     |                    |
| 10  | 7469 .. 2.810.47494268 | 7.63387776e+8  | 0.47494268     |                    | 21  | 3814 .. 4.782.17071009 | 3.48903910e+9 | 2.17071009     |                    |
| 11  | 3156 .. 2.880.53880036 | 8.66027904e+8  | 0.53880036     |                    | 22  | 2189 .. 6.271.00053573 | 1.60818714e+9 | 1.00053573     |                    |

This report was created by ACD/NMR Processor Academic Edition. For more information go to [www.acdlabs.com/nmrproc/](http://www.acdlabs.com/nmrproc/)

|                        |                                                                                                            |                        |                                                                                   |                      |            |                       |
|------------------------|------------------------------------------------------------------------------------------------------------|------------------------|-----------------------------------------------------------------------------------|----------------------|------------|-----------------------|
| Acquisition Time (sec) | 1.1010                                                                                                     | Comment                | EJT-PRM 169 f28-36 44mg 0115 062 mCARBON CDCl3 (E:\bruk500cdata\2015Jan) staff 10 |                      |            |                       |
| Date                   | 14 Jan 2015 02:48:32                                                                                       | Date Stamp             | 14 Jan 2015 02:48:32                                                              |                      |            |                       |
| File Name              | \\ss7a.ds.man.ac.uk\vol5\vol3\users\snmrdata\bruk500cdata\2015Jan\data\staff\nmr\2015-01-13-staff-10\11Vid |                        | Frequency (MHz)                                                                   | 125.77               |            |                       |
| Nucleus                | 13C                                                                                                        | Number of Transients   | 5000                                                                              | Origin               | spect      | Original Points Count |
| Owner                  | nmrsu                                                                                                      | Points Count           | 32768                                                                             | Pulse Sequence       | zgpg30     | Receiver Gain         |
| SW(cyclical) (Hz)      | 29761.90                                                                                                   | Solvent                | CHLOROFORM-d                                                                      | Spectrum Offset (Hz) | 12571.4053 | Spectrum Type         |
| Sweep Width (Hz)       | 29761.00                                                                                                   | Temperature (degree C) | 24.997                                                                            | STANDARD             |            |                       |

PRM169-CNMR.esp

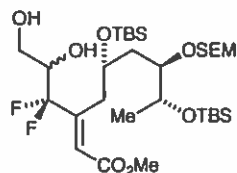

76

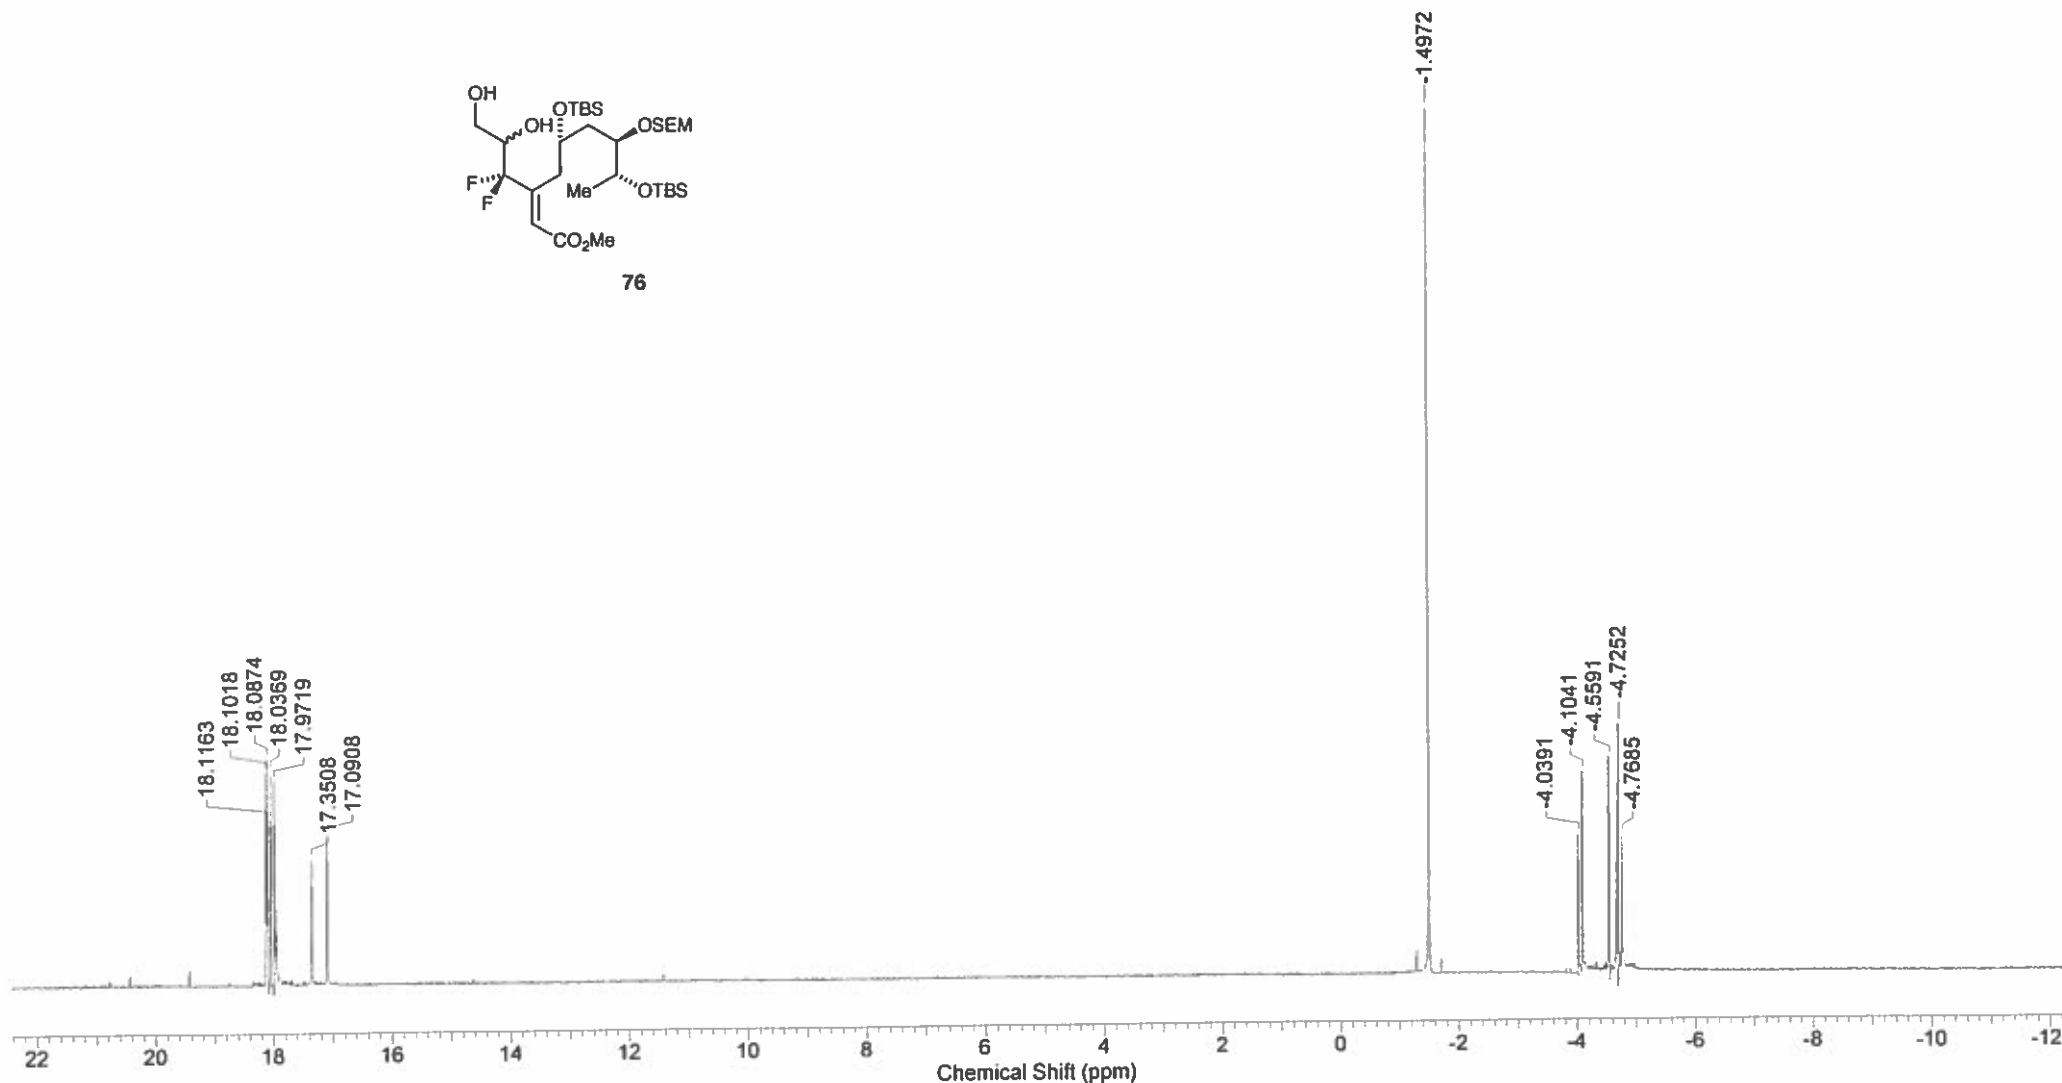

This report was created by ACD/NMR Processor Academic Edition. For more information go to [www.acdlabs.com/nmrproc/](http://www.acdlabs.com/nmrproc/)

|                        |                                                                                                              |                        |                                                                                    |                      |            |
|------------------------|--------------------------------------------------------------------------------------------------------------|------------------------|------------------------------------------------------------------------------------|----------------------|------------|
| Acquisition Time (sec) | 1.1010                                                                                                       | Comment                | EJT-PRM 169 f28-36 44mg 0115 062 mCARBON CDCl3 (E:\bruk500cdata\2015\Jan) staff 10 |                      |            |
| Date                   | 14 Jan 2015 02:48:32                                                                                         | Date Stamp             | 14 Jan 2015 02:48:32                                                               |                      |            |
| File Name              | \\ss7a.ds.man.ac.uk\vol5\vol3\users\snmrdata\bruk500cdata\2015\Jan\data\staff\nmr\2015-01-13-staff-10\11\fid |                        |                                                                                    | Frequency (MHz)      | 125.77     |
| Nucleus                | 13C                                                                                                          | Number of Transients   | 5000                                                                               | Origin               | spect      |
| Owner                  | nmrsu                                                                                                        | Points Count           | 32768                                                                              | Pulse Sequence       | zgpg30     |
| SW(cyclical) (Hz)      | 29761.90                                                                                                     | Solvent                | CHLOROFORM-d                                                                       | Receiver Gain        | 184.40     |
| Sweep Width (Hz)       | 29761.00                                                                                                     | Temperature (degree C) | 24.997                                                                             | Spectrum Offset (Hz) | 12571.4053 |
|                        |                                                                                                              |                        |                                                                                    | Spectrum Type        | STANDARD   |

PRM169-CNMR.esp

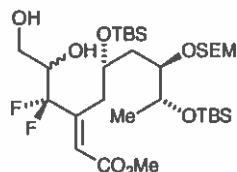

76

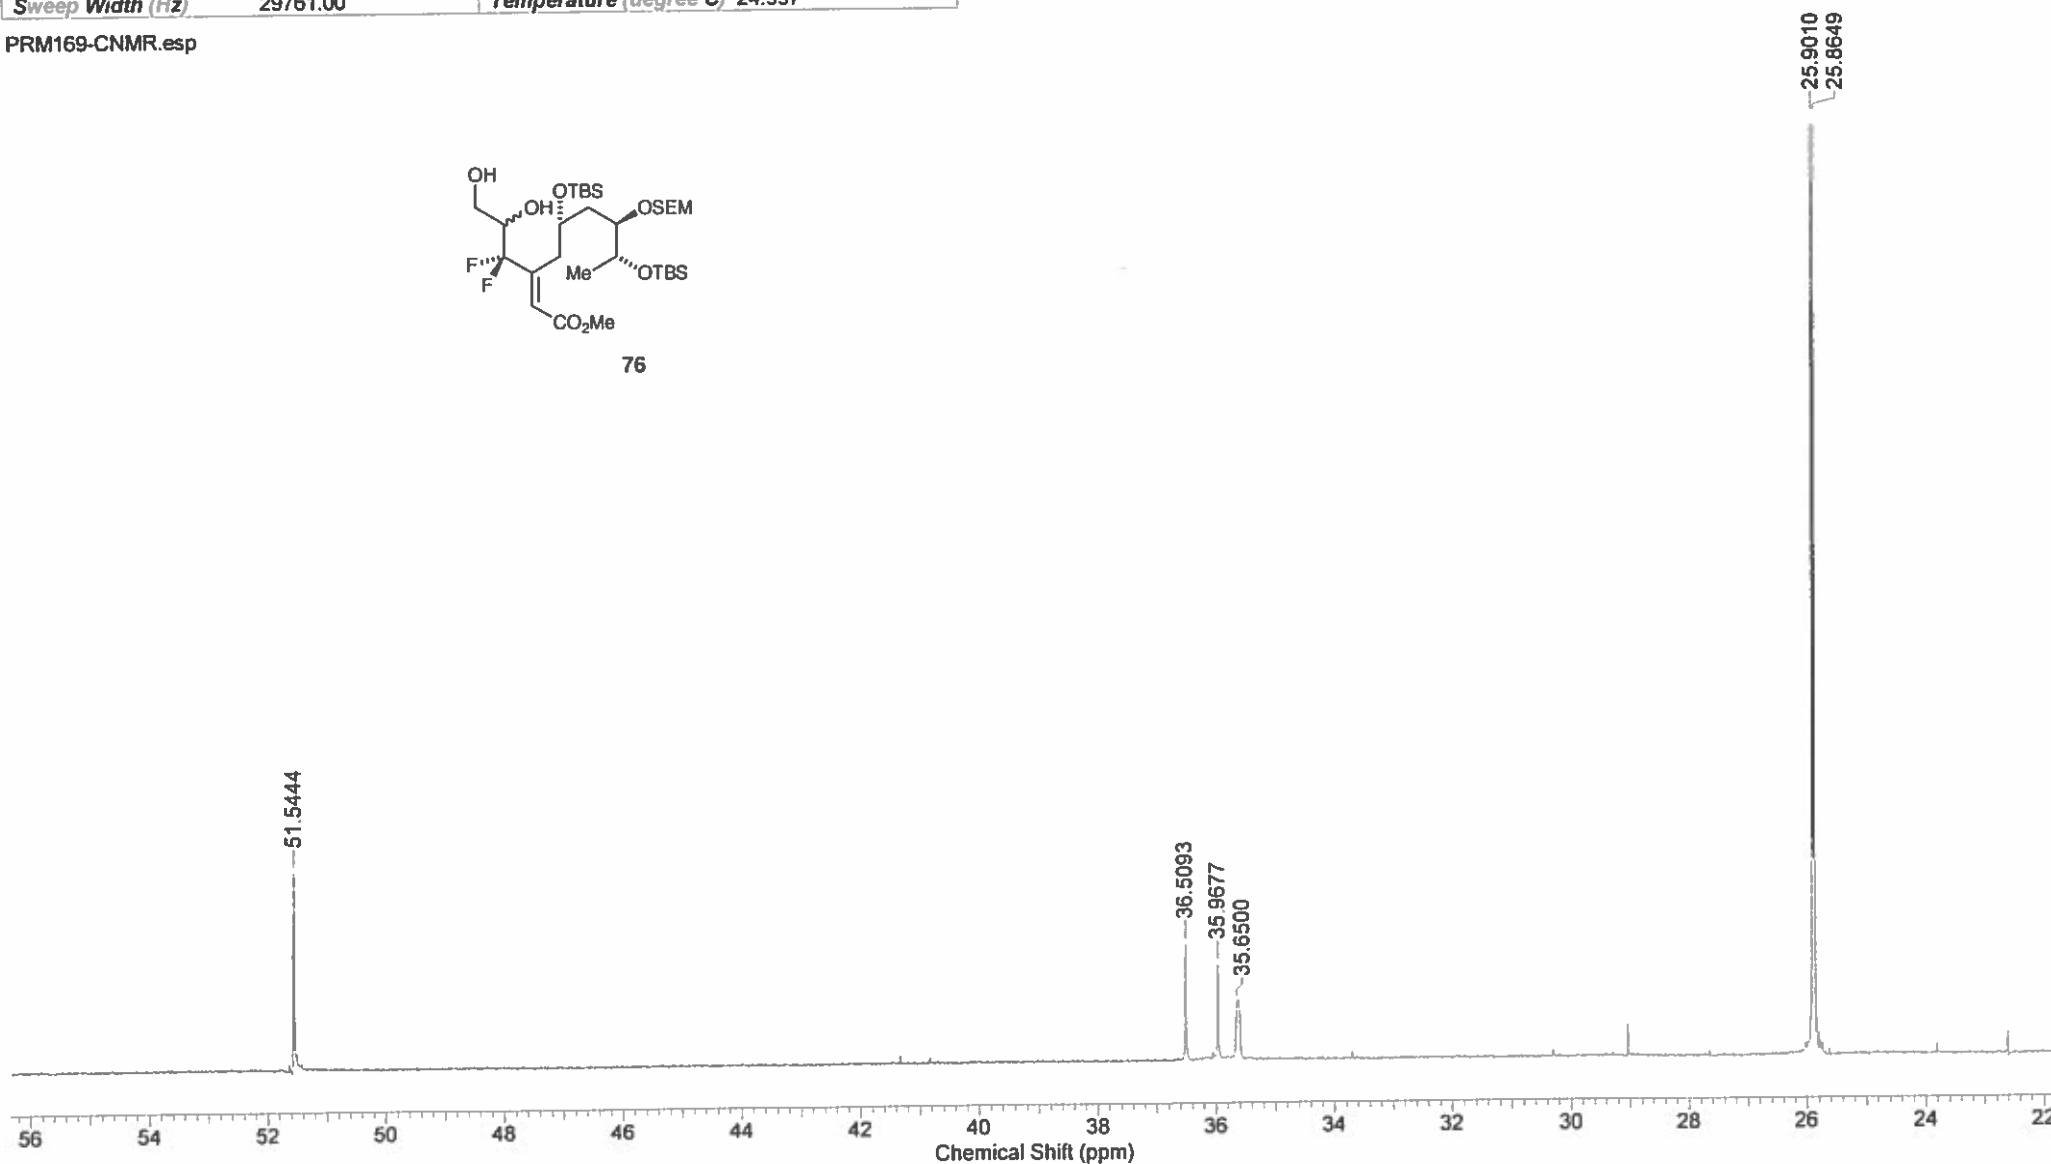

This report was created by ACD/NMR Processor Academic Edition. For more information go to [www.acdlabs.com/nmrproc/](http://www.acdlabs.com/nmrproc/)

|                        |                                                                                                             |                        |                                                                                   |                       |            |
|------------------------|-------------------------------------------------------------------------------------------------------------|------------------------|-----------------------------------------------------------------------------------|-----------------------|------------|
| Acquisition Time (sec) | 1.1010                                                                                                      | Comment                | EJT-PRM 169 f28-36 44mg 0115 062 mCARBON CDCl3 (E:\bruk500cdata\2015Jan) staff 10 |                       |            |
| Date                   | 14 Jan 2015 02:48:32                                                                                        | Date Stamp             | 14 Jan 2015 02:48:32                                                              |                       |            |
| File Name              | \\ss7a.ds.man.ac.uk\vol5\vol3\users\snmrdata\bruk500cdata\2015Jan\data\staff\nmr\2015-01-13-staff-10\11\fid |                        |                                                                                   | Frequency (MHz)       | 125.77     |
| Nucleus                | 13C                                                                                                         | Number of Transients   | 5000                                                                              | Origin                | spect      |
| Owner                  | nmrsu                                                                                                       | Points Count           | 32768                                                                             | Pulse Sequence        | zgpg30     |
| SW(cyclical) (Hz)      | 29761.90                                                                                                    | Solvent                | CHLOROFORM-d                                                                      | Original Points Count | 32768      |
| Sweep Width (Hz)       | 29761.00                                                                                                    | Temperature (degree C) | 24.997                                                                            | Receiver Gain         | 184.40     |
|                        |                                                                                                             |                        |                                                                                   | Spectrum Offset (Hz)  | 12571.4053 |
|                        |                                                                                                             |                        |                                                                                   | Spectrum Type         | STANDARD   |

PRM169-CNMR.esp

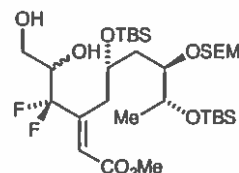

76

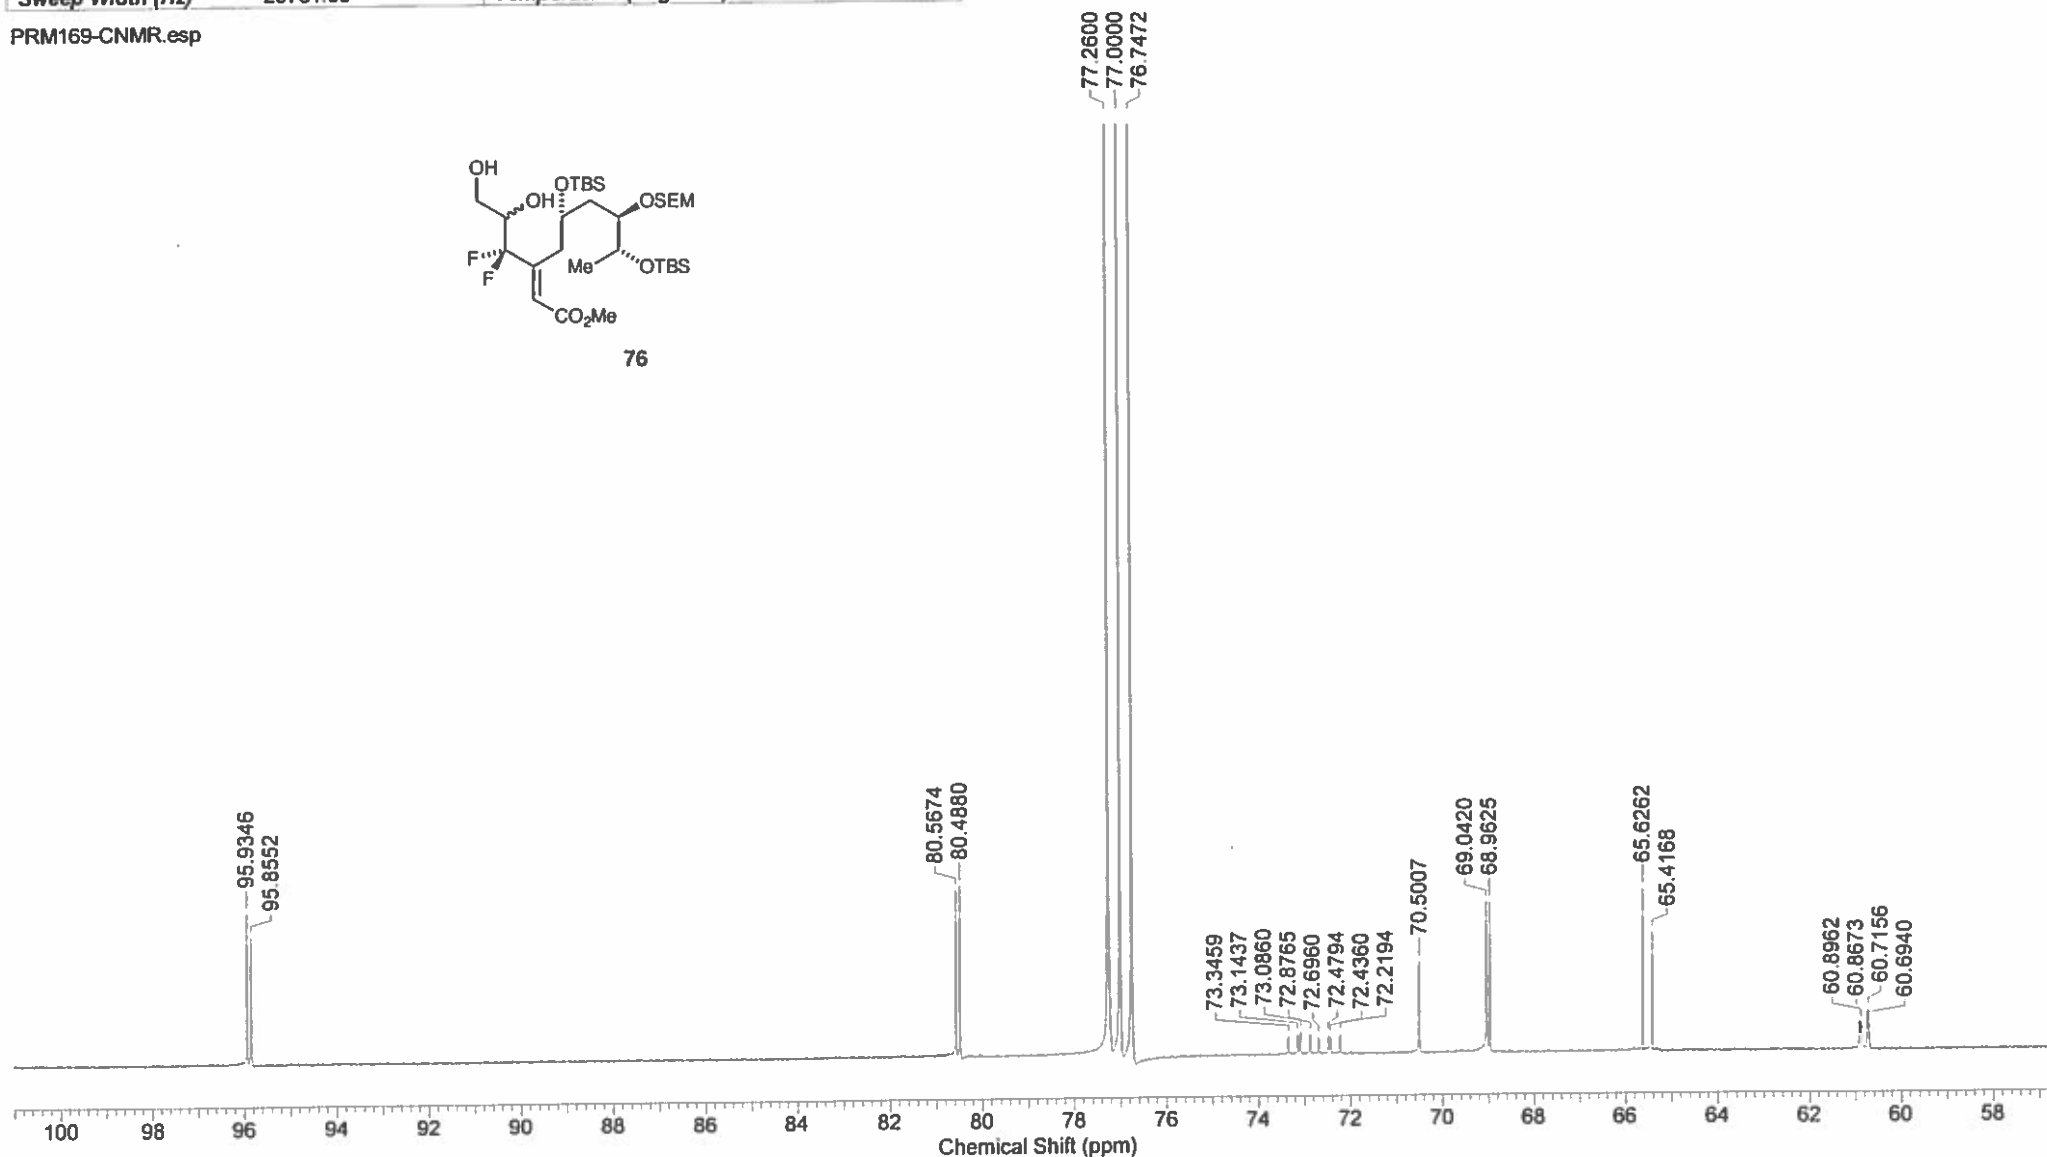



This report was created by ACD/NMR Processor Academic Edition. For more information go to [www.acdlabs.com/nmrproc/](http://www.acdlabs.com/nmrproc/)

|                        |                                                                                                            |                        |                                                                                   |                      |            |
|------------------------|------------------------------------------------------------------------------------------------------------|------------------------|-----------------------------------------------------------------------------------|----------------------|------------|
| Acquisition Time (sec) | 1.1010                                                                                                     | Comment                | EJT-PRM 169 (28-36 44mg 0115 062 mCARBON CDCl3 (E:\bruk500cdata\2015Jan) staff 10 |                      |            |
| Date                   | 14 Jan 2015 02:48:32                                                                                       | Date Stamp             | 14 Jan 2015 02:48:32                                                              |                      |            |
| File Name              | \\ss7a.ds.man.ac.uk\vol5\vol3\users\snmrdata\bruk500cdata\2015Jan\data\staff\nmr\2015-01-13-staff-10\11Vid |                        |                                                                                   | Frequency (MHz)      | 125.77     |
| Nucleus                | <sup>13</sup> C                                                                                            | Number of Transients   | 5000                                                                              | Origin               | spect      |
| Owner                  | nmsu                                                                                                       | Points Count           | 32768                                                                             | Pulse Sequence       | zgpg30     |
| SW(cyclical) (Hz)      | 29761.90                                                                                                   | Solvent                | CHLOROFORM-d                                                                      | Spectrum Offset (Hz) | 12571.4053 |
| Sweep Width (Hz)       | 29761.00                                                                                                   | Temperature (degree C) | 24.997                                                                            | Spectrum Type        | STANDARD   |

PRM169-CNMR.esp

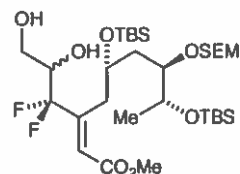

76

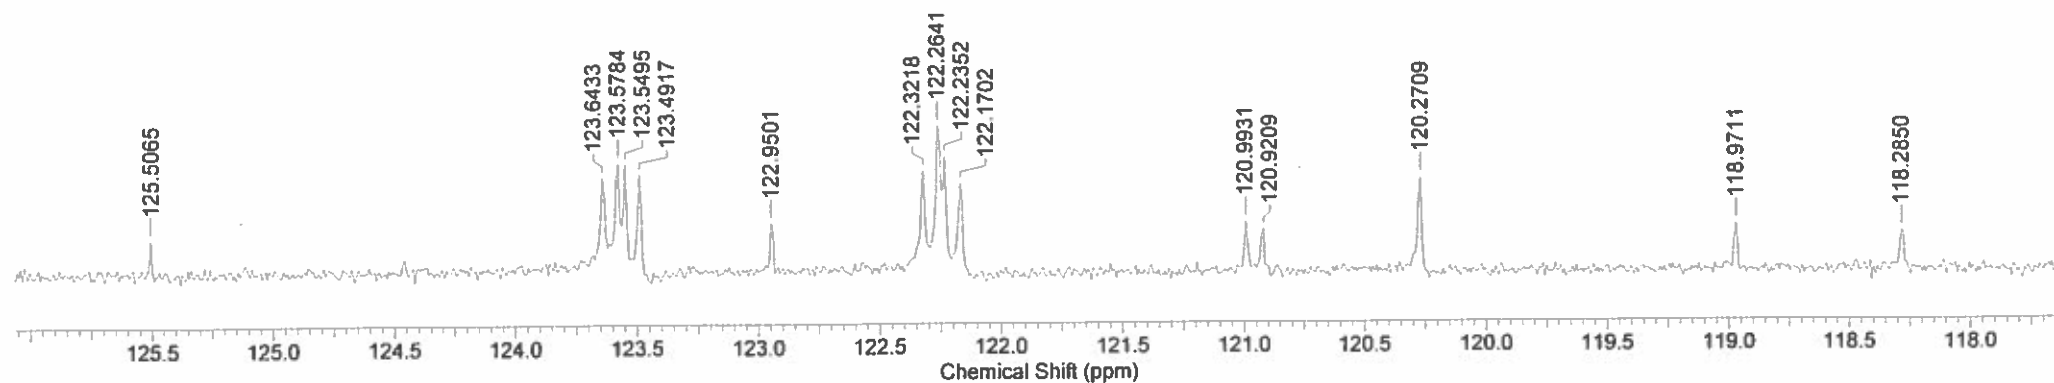

This report was created by ACD/NMR Processor Academic Edition. For more information go to [www.acdlabs.com/nmrproc/](http://www.acdlabs.com/nmrproc/)

|                        |                                                                                                             |                        |                                                                                   |                      |            |                       |          |
|------------------------|-------------------------------------------------------------------------------------------------------------|------------------------|-----------------------------------------------------------------------------------|----------------------|------------|-----------------------|----------|
| Acquisition Time (sec) | 1.1010                                                                                                      | Comment                | EJT-PRM 169 f28-36 44mg 0115 062 mCARBON CDCl3 (E:\bruk500cdata\2015Jan) staff 10 |                      |            |                       |          |
| Date                   | 14 Jan 2015 02:48:32                                                                                        | Date Stamp             | 14 Jan 2015 02:48:32                                                              |                      |            |                       |          |
| File Name              | \\ss7a.ds.man.ac.uk\vol5\vol3\users\snmrdata\bruk500cdata\2015Jan\data\staff\nmr\2015-01-13-staff-10\11\fid |                        |                                                                                   |                      |            | Frequency (MHz)       | 125.77   |
| Nucleus                | 13C                                                                                                         | Number of Transients   | 5000                                                                              | Origin               | spect      | Original Points Count | 32768    |
| Owner                  | nmrsu                                                                                                       | Points Count           | 32768                                                                             | Pulse Sequence       | zgpg30     | Receiver Gain         | 184.40   |
| SW(cyclical) (Hz)      | 29761.90                                                                                                    | Solvent                | CHLOROFORM-d                                                                      | Spectrum Offset (Hz) | 12571.4053 | Spectrum Type         | STANDARD |
| Sweep Width (Hz)       | 29761.00                                                                                                    | Temperature (degree C) | 24.997                                                                            |                      |            |                       |          |

PRM169-CNMR.esp

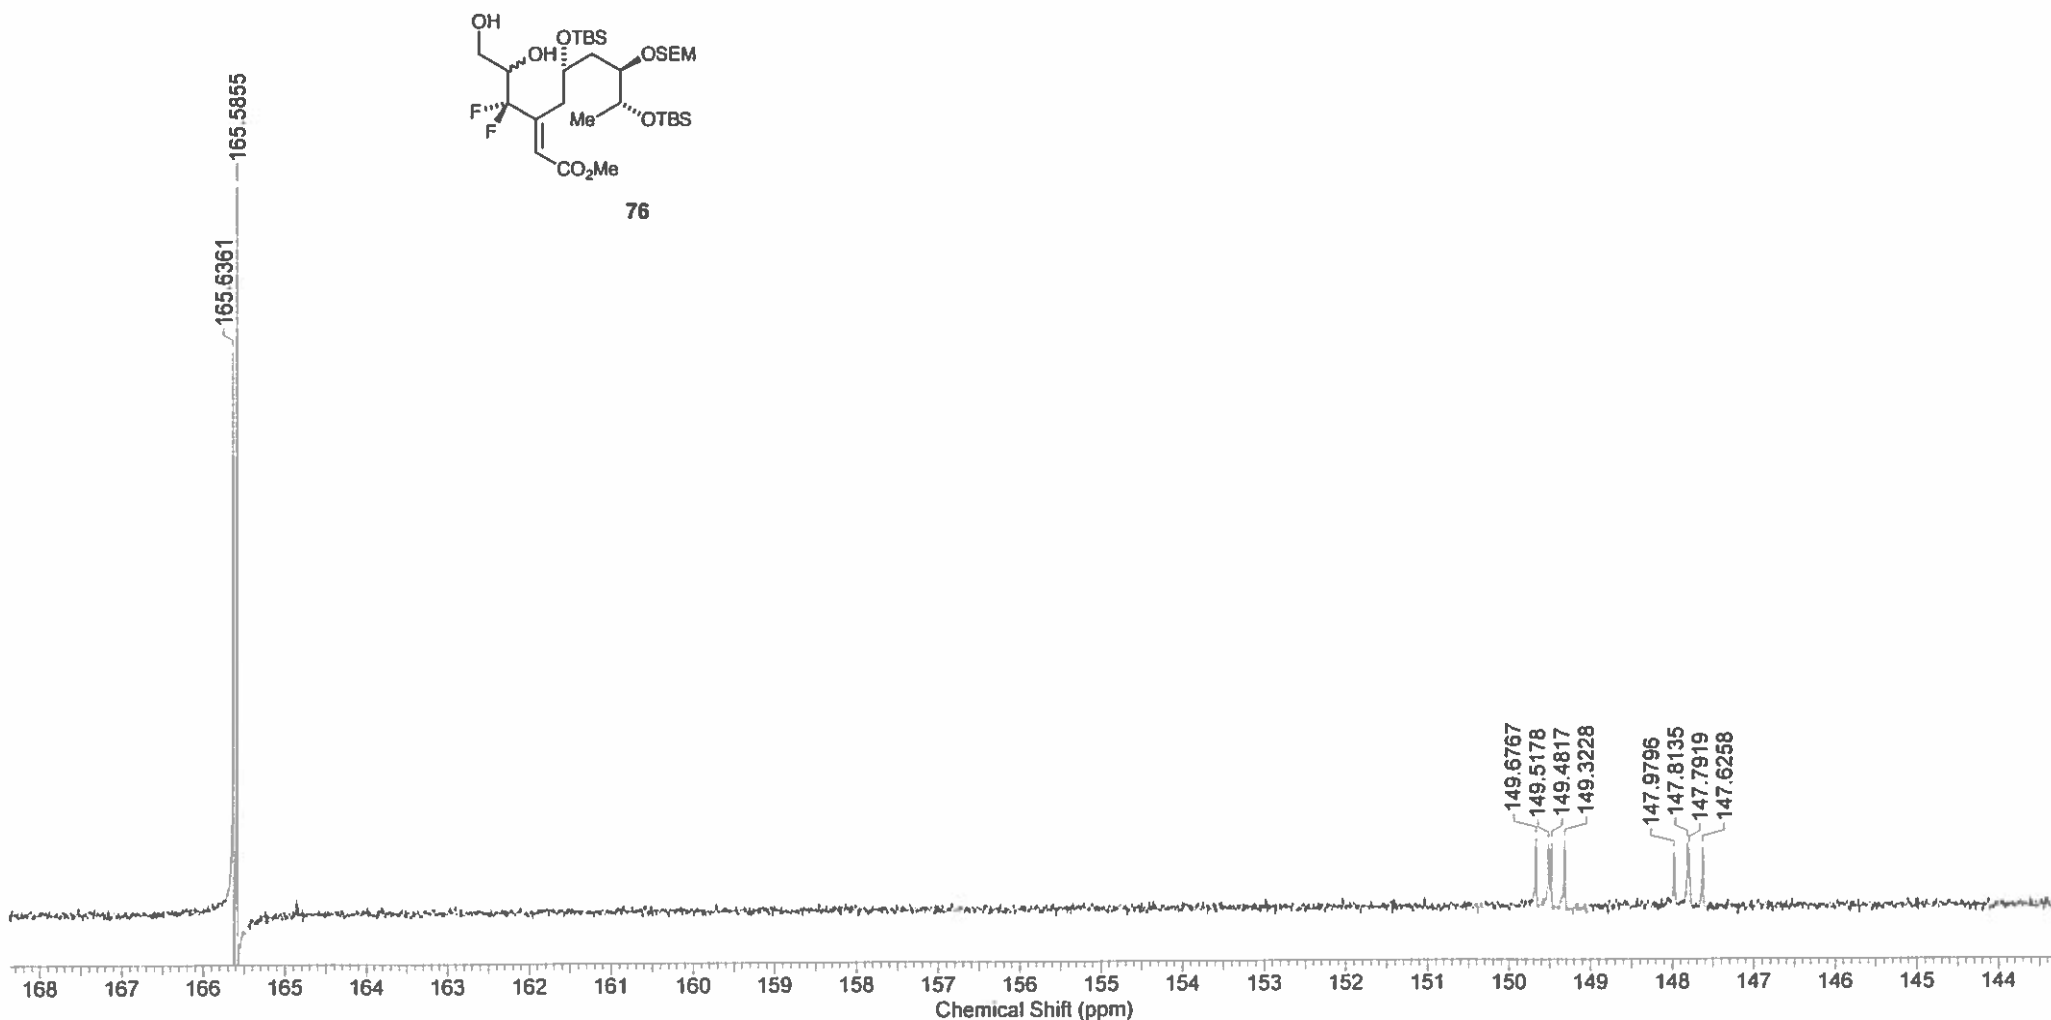

This report was created by ACD/NMR Processor Academic Edition. For more information go to [www.acdlabs.com/nmrproc/](http://www.acdlabs.com/nmrproc/)

|                        |                                                                                                          |                        |                                                                        |  |
|------------------------|----------------------------------------------------------------------------------------------------------|------------------------|------------------------------------------------------------------------|--|
| Acquisition Time (sec) | 0.5767                                                                                                   | Comment                | EJT-PRM169 f28-36 44mg m19FCPD CDCl3 (E:\bruk500adata\2015\Jan) ejt 10 |  |
| Date                   | 12 Jan 2015 13:09:20                                                                                     | Date Stamp             | 12 Jan 2015 13:09:20                                                   |  |
| File Name              | \\ss7a.ds.man.ac.uk\vol5\vol3\users\snmrdata\bruk500adata\2015\Jan\data\ejt\nmr\2015-01-12-ejt-10\23\fid | Frequency (MHz)        | 470.59                                                                 |  |
| Nucleus                | 19F                                                                                                      | Original Points Count  | 65536                                                                  |  |
| Owner                  | nmrsu                                                                                                    | Receiver Gain          | 575.00                                                                 |  |
| SW(cyclical) (Hz)      | 113636.37                                                                                                | Spectrum Type          | STANDARD                                                               |  |
| Sweep Width (Hz)       | 113634.63                                                                                                | Temperature (degree C) | 20.500                                                                 |  |
|                        |                                                                                                          | Number of Transients   | 16                                                                     |  |
|                        |                                                                                                          | Points Count           | 65536                                                                  |  |
|                        |                                                                                                          | Solvent                | CHLOROFORM-d                                                           |  |
|                        |                                                                                                          | Pulse Sequence         | zgfhigqn                                                               |  |
|                        |                                                                                                          | Spectrum Offset (Hz)   | -47059.0234                                                            |  |

PRM169-F(1H)NMR.esp

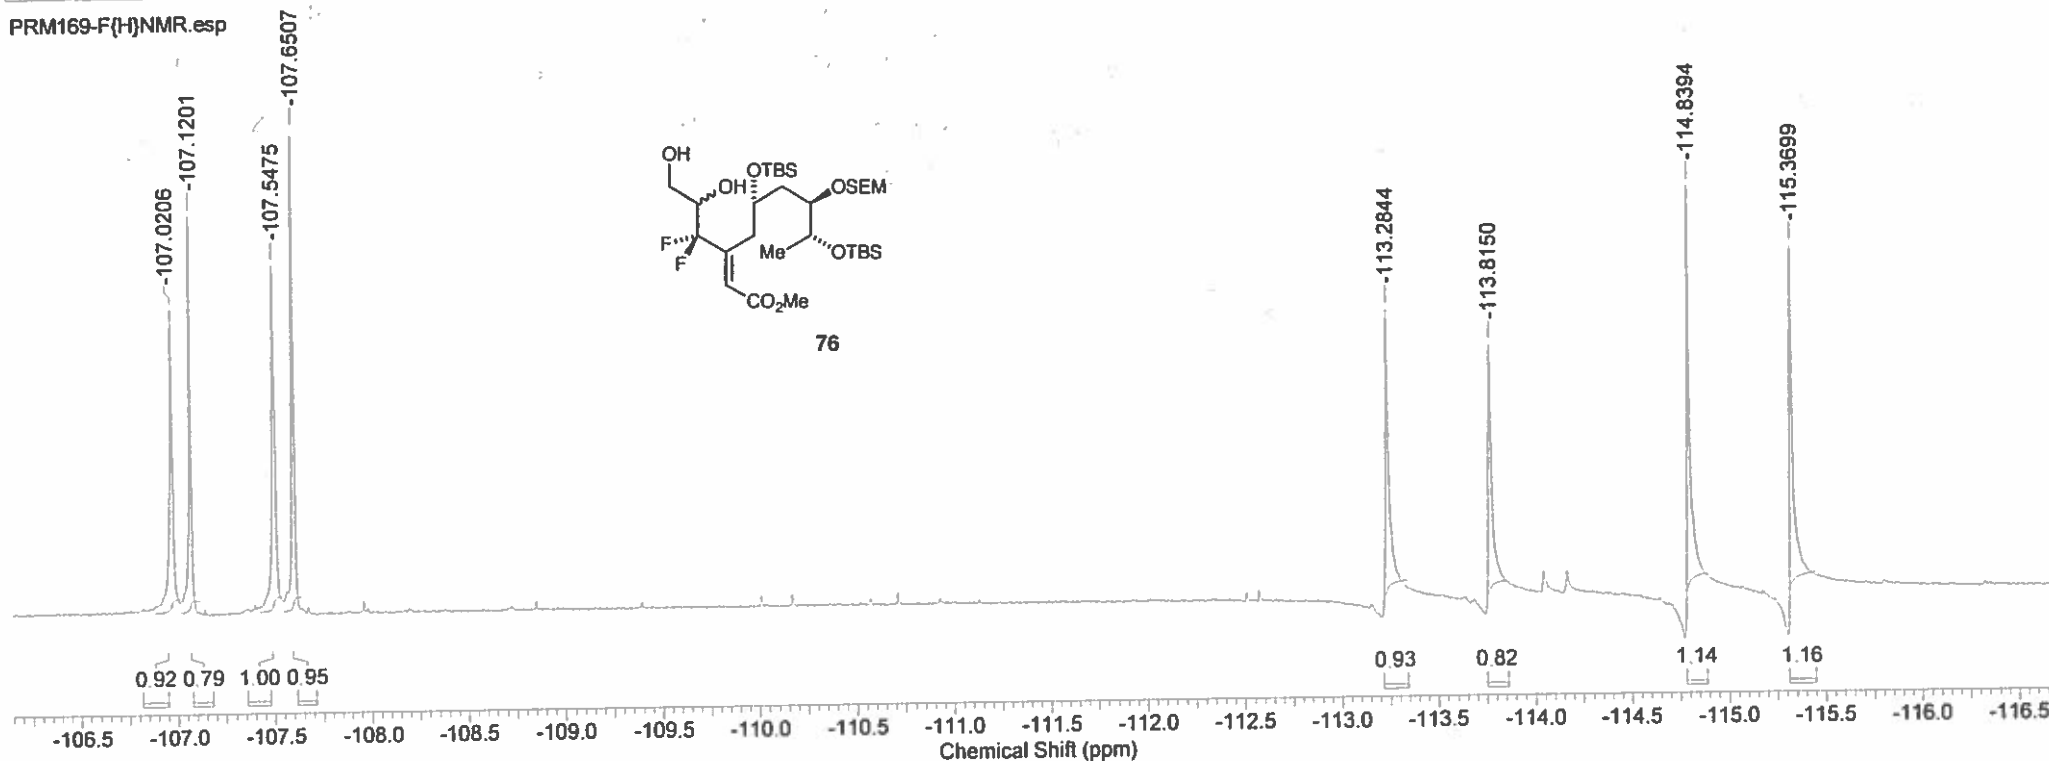

| No. | (ppm)                  | Value | Absolute Value | Non-Negative Value |
|-----|------------------------|-------|----------------|--------------------|
| 1   | 4979 .. -1151.16230905 |       | 2.03938675e+9  | 1.16230905         |
| 2   | 3359 .. -1141.13637888 |       | 1.99388979e+9  | 1.13637888         |
| 3   | 3101 .. -1130.82051349 |       | 1.43967245e+9  | 0.82051349         |
| 4   | 3913 .. -1130.92547381 |       | 1.62383578e+9  | 0.92547381         |
| 5   | 3915 .. -1070.94717634 |       | 1.66191501e+9  | 0.94717634         |
| 6   | 5948 .. -1070.99769104 |       | 1.75054810e+9  | 0.99769104         |
| 7   | 1681 .. -1070.79453856 |       | 1.39409690e+9  | 0.79453856         |
| 8   | 0656 .. -1060.92355108 |       | 1.62046221e+9  | 0.92355108         |

This report was created by ACD/NMR Processor Academic Edition. For more information go to [www.acdlabs.com/nmrproc/](http://www.acdlabs.com/nmrproc/)

|                        |                                                                                       |                        |                                                                        |                      |           |
|------------------------|---------------------------------------------------------------------------------------|------------------------|------------------------------------------------------------------------|----------------------|-----------|
| Acquisition Time (sec) | 3.9649                                                                                | Comment                | EJT-PRM170 f75-87 27mg mPROTON CDC13 (e:\bruk400adata\2015\Jan)\ejt-38 |                      |           |
| Date                   | 21 Jan 2015 14:06:56                                                                  |                        | Date Stamp                                                             | 21 Jan 2015 14:06:56 |           |
| File Name              | \\ss7a.ds.man.ac.uk\vol5\vol3\users\snmrdata\bruk400adata\2015\Jan\data\ejt-38\10\vid |                        |                                                                        | Frequency (MHz)      | 400.13    |
| Nucleus                | <sup>1</sup> H                                                                        | Number of Transients   | 16                                                                     | Origin               | AV400     |
| Owner                  | nmsu                                                                                  | Points Count           | 32768                                                                  | Pulse Sequence       | zg30b     |
| SW(cyclical) (Hz)      | 8264.46                                                                               | Solvent                | CHLOROFORM-d                                                           | Receiver Gain        | 101.00    |
| Sweep Width (Hz)       | 8264.21                                                                               | Temperature (degree C) | 23.000                                                                 | Spectrum Offset (Hz) | 2464.9270 |
|                        |                                                                                       |                        |                                                                        | Spectrum Type        | STANDARD  |

PRM170-HNMR.esp

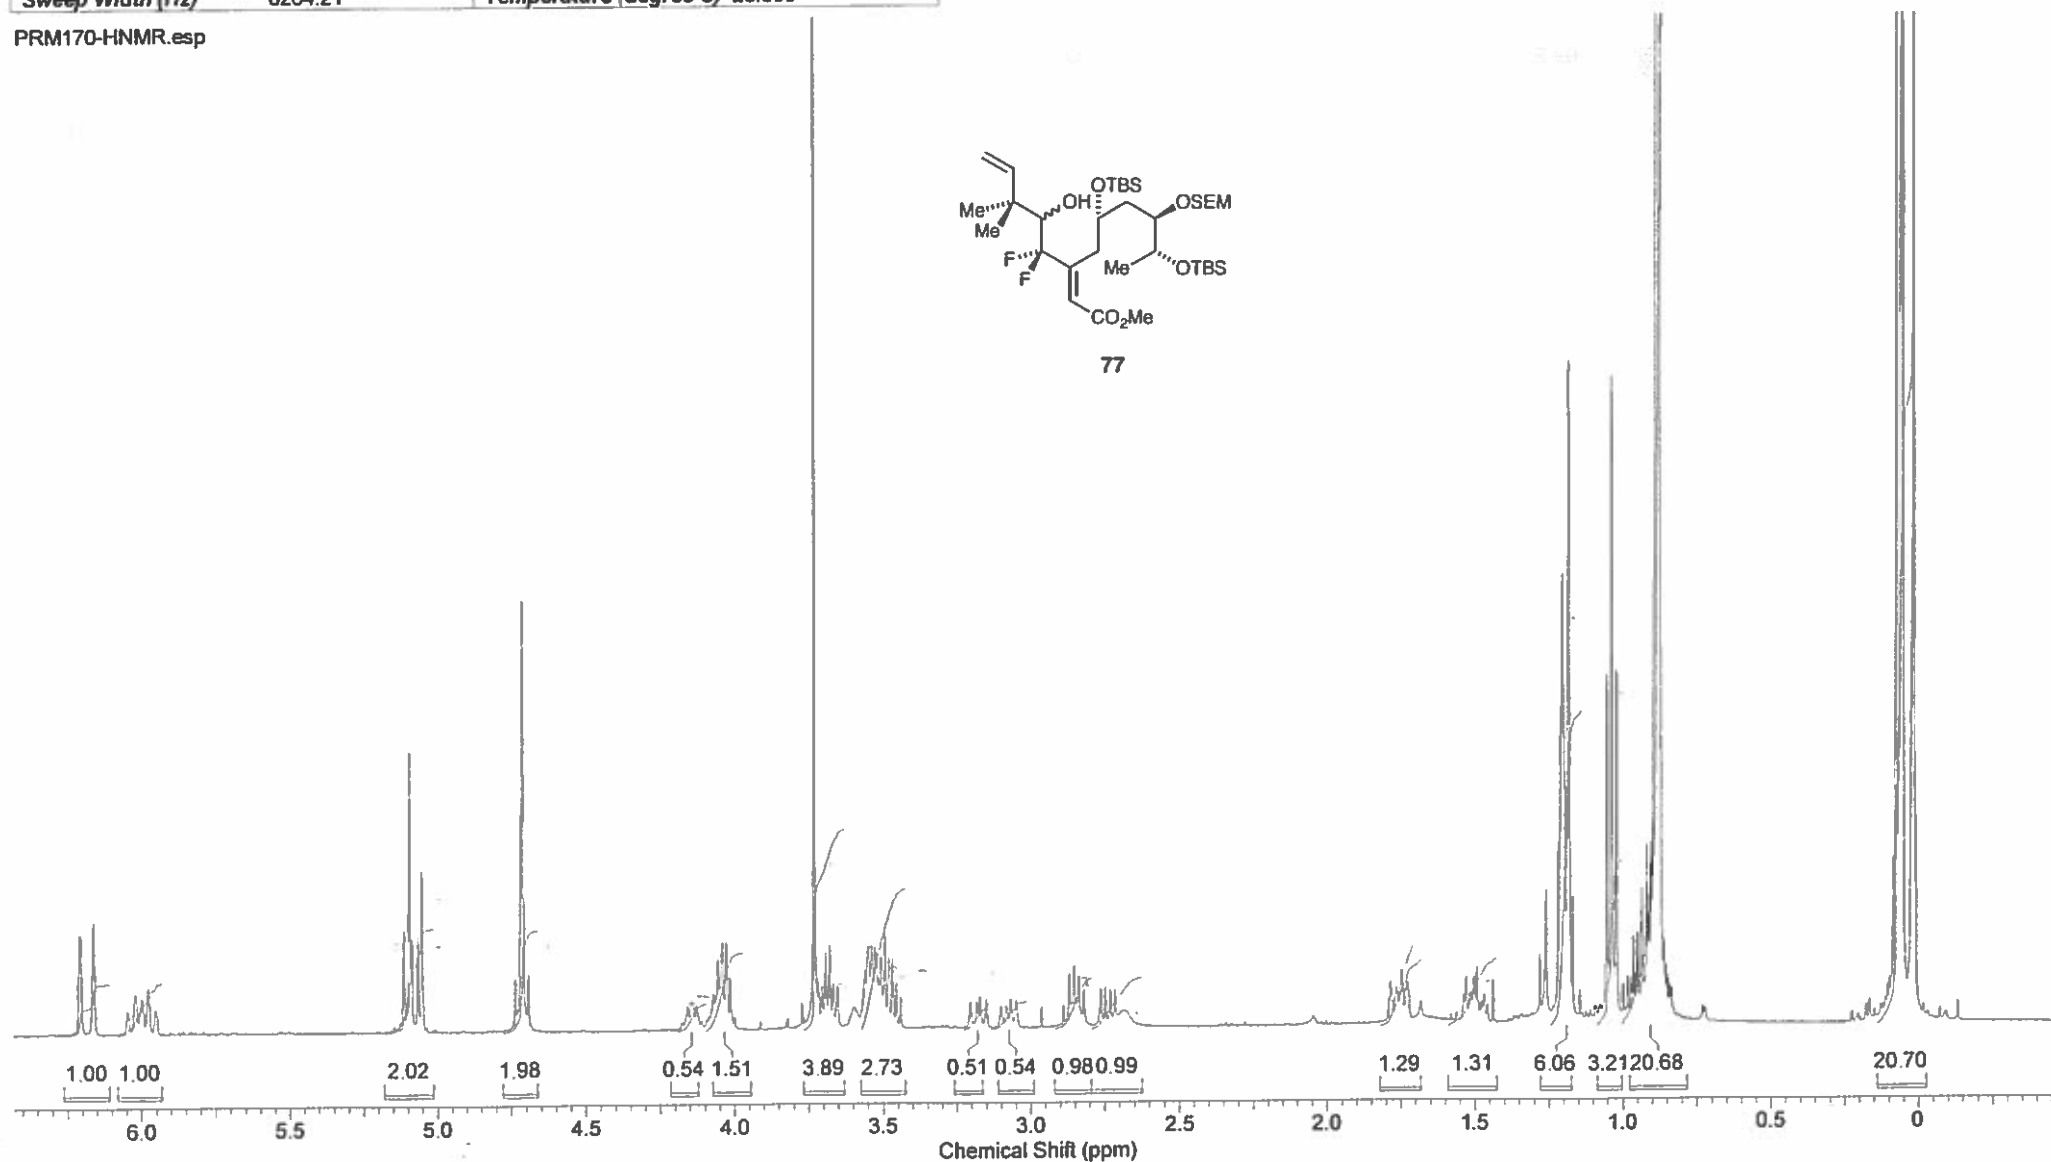

EJT-PRM170 Prod

mCARBON-13-CPDB (e:\bruk400\data\2015\Jan)\ejt 16

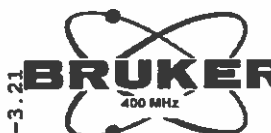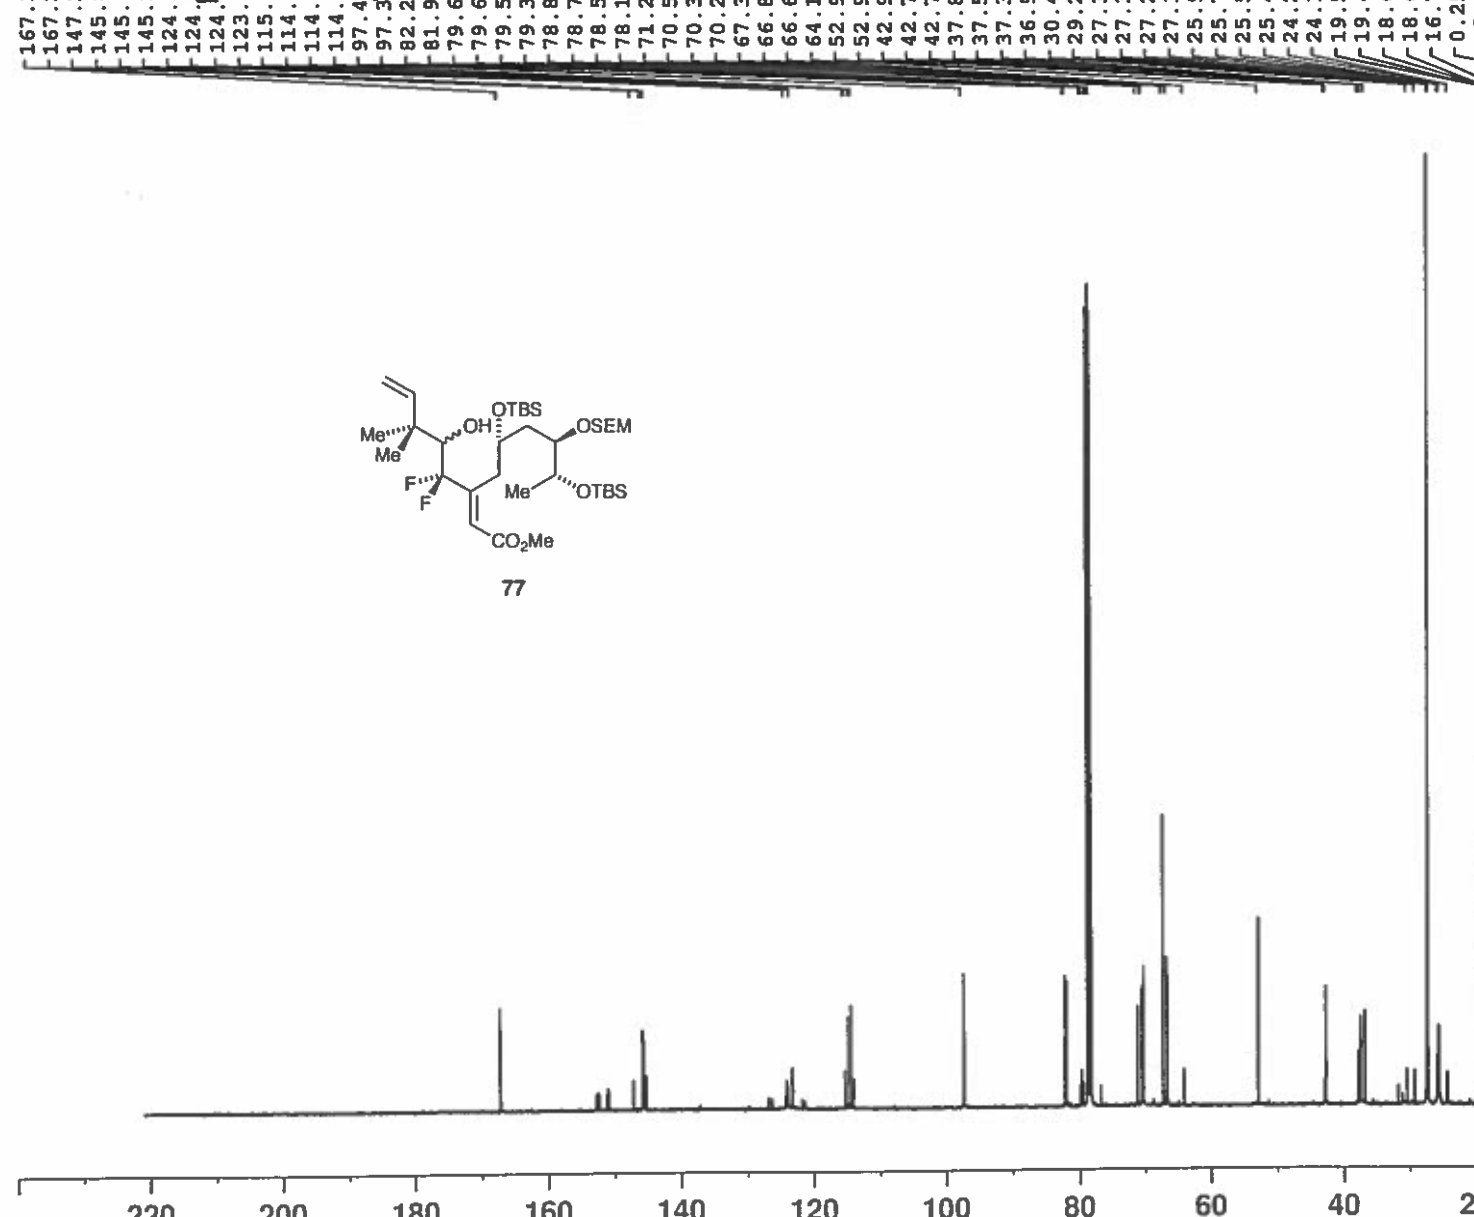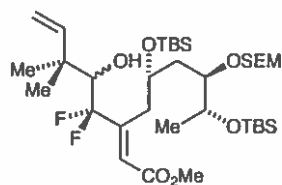

77

Current Data Parameters  
NAME 2015-01-30-ejt-16  
EXPNO 10  
PROCNO 1

F2 - Acquisition Parameters  
Date\_ 20150131  
Time 6.33  
INSTRUM spect  
PROBHD 5 mm CPPBBO BB  
PULPROG zgpg30  
TD 65536  
SOLVENT CDC13  
NS 1024  
DS 4  
SWH 24038.461 Hz  
FIDRES 0.366798 Hz  
AQ 1.3631488 sec  
RG 45.2  
DW 20.800 usec  
DE 41.77 usec  
TE 287.9 K  
D1 2.00000000 sec  
D11 0.03000000 sec  
TDO 1

===== CHANNEL f1 =====  
SFO1 100.6077379 MHz  
NUC1 13C  
P1 10.00 usec  
PLW1 33.00000000 W

===== CHANNEL f2 =====  
SFO2 400.0716003 MHz  
NUC2 1H  
CPDPRG[2] waltz16  
PCPD2 80.00 usec  
PLW2 7.40000010 W  
PLW12 0.17209999 W  
PLW13 0.11014000 W

F2 - Processing parameters  
SI 32768  
SF 100.5975361 MHz  
WDW EM  
SSB 0  
LB 1.00 Hz  
GB 0  
CB 1.40

|                               |                                                                                                           |                               |                                                                        |                             |                        |                              |          |
|-------------------------------|-----------------------------------------------------------------------------------------------------------|-------------------------------|------------------------------------------------------------------------|-----------------------------|------------------------|------------------------------|----------|
| <b>Acquisition Time (sec)</b> | 0.7340                                                                                                    | <b>Comment</b>                | EJT-PRM170 f75-87 27mg mF19CPD CDCI3 (e:\bruk400\data\2015\Jan) ejt 38 |                             |                        |                              |          |
| <b>Date</b>                   | 21 Jan 2015 14:11:12                                                                                      |                               | <b>Date Stamp</b>                                                      |                             | 21 Jan 2015 14:11:12   |                              |          |
| <b>File Name</b>              | \\ss7a.ds.man.ac.uk\vol5\vol3\users\snmr\data\bruk400\data\2015\Jan\data\ejt\nmr\2015-01-21-ejt-38112\fid |                               |                                                                        |                             | <b>Frequency (MHz)</b> | 376.50                       |          |
| <b>Nucleus</b>                | 19F                                                                                                       | <b>Number of Transients</b>   | 16                                                                     | <b>Origin</b>               | AV400                  | <b>Original Points Count</b> | 65536    |
| <b>Owner</b>                  | nmrsu                                                                                                     | <b>Points Count</b>           | 65536                                                                  | <b>Pulse Sequence</b>       | zgig                   | <b>Receiver Gain</b>         | 406.00   |
| <b>SW(cyclical) (Hz)</b>      | 89285.71                                                                                                  | <b>Solvent</b>                | CHLOROFORM-d                                                           | <b>Spectrum Offset (Hz)</b> | -37649.5977            | <b>Spectrum Type</b>         | STANDARD |
| <b>Sweep Width (Hz)</b>       | 89284.35                                                                                                  | <b>Temperature (degree C)</b> | 23.000                                                                 |                             |                        |                              |          |

PRM170-F{H}NMR.esp

Chemical structure of compound **77** is shown above the spectrum. The structure is a substituted cyclohexane derivative with the following features: a vinyl group, a methyl group, a fluorine atom, a hydroxyl group (OTBS), a methoxycarbonyl group (CO<sub>2</sub>Me), a methoxy group (OSEM), and a methyl group (OTBS).

Chemical Shift (ppm): -97, -98, -99, -100, -101, -102, -103, -104, -105, -106, -107, -108, -109, -110, -111, -112, -113, -114, -115

Peak Data:

| Chemical Shift (ppm) | Integration |
|----------------------|-------------|
| -98.3837             | 0.18        |
| -98.9373             | 0.18        |
| -99.0350             | 0.21        |
| -99.5687             | 0.21        |
| -112.0077            | 0.21        |
| -112.6590            | 0.20        |
| -113.1982            | 0.21        |
| -113.8531            | 0.19        |

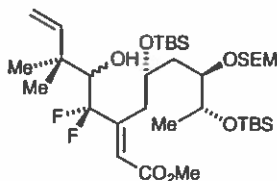

77

| No. | (ppm)          | Value    | Absolute Value | Non-Negative Value |
|-----|----------------|----------|----------------|--------------------|
| 1   | 9327 .. -1130. | 18757442 | 3.96218432e+8  | 0.18757442         |
| 2   | 2709 .. -1130. | 20678121 | 4.36789440e+8  | 0.20678121         |
| 3   | 7358 .. -1120. | 19675171 | 4.15603872e+8  | 0.19675171         |
| 4   | 9951 .. -1110. | 21439180 | 4.52865504e+8  | 0.21439180         |
| 5   | 5717 .. -99.50 | 21261145 | 4.49104832e+8  | 0.21261145         |
| 6   | 1085 .. -98.50 | 20801891 | 4.39403872e+8  | 0.20801891         |
| 7   | 3958 .. -98.80 | 18103851 | 3.82412448e+8  | 0.18103851         |
| 8   | 4783 .. -98.30 | 17934489 | 3.78834976e+8  | 0.17934489         |

This report was created by ACD/NMR Processor Academic Edition. For more information go to [www.acdlabs.com/nmrproc/](http://www.acdlabs.com/nmrproc/)

|                        |                                                                                                         |                        |                                                                       |                      |           |
|------------------------|---------------------------------------------------------------------------------------------------------|------------------------|-----------------------------------------------------------------------|----------------------|-----------|
| Acquisition Time (sec) | 4.0894                                                                                                  | Comment                | EJT-PRM171 f3-9 50mg mPROTON A CDCl3 (e:\bruk400cdata\2015\Feb) ejt 6 |                      |           |
| Date                   | 04 Feb 2015 16:06:24                                                                                    | Date Stamp             | 04 Feb 2015 16:06:24                                                  |                      |           |
| File Name              | \\ss7a.ds.man.ac.uk\vol5\vol3\users\snmrdata\bruk400cdata\2015\Feb\data\ejt\nmr\2015-02-04-ejt-6\10\fid |                        |                                                                       | Frequency (MHz)      | 400.07    |
| Nucleus                | 1H                                                                                                      | Number of Transients   | 4                                                                     | Origin               | spect     |
| Owner                  | nmrsu                                                                                                   | Points Count           | 32768                                                                 | Pulse Sequence       | zg30      |
| SW(cyclical) (Hz)      | 8012.82                                                                                                 | Solvent                | CHLOROFORM-d                                                          | Spectrum Offset (Hz) | 1894.0684 |
| Sweep Width (Hz)       | 8012.58                                                                                                 | Temperature (degree C) | 14.793                                                                | Spectrum Type        | STANDARD  |

PRM171-HNMR.esp

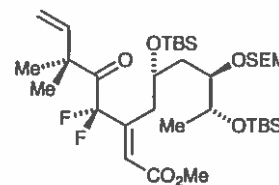

78

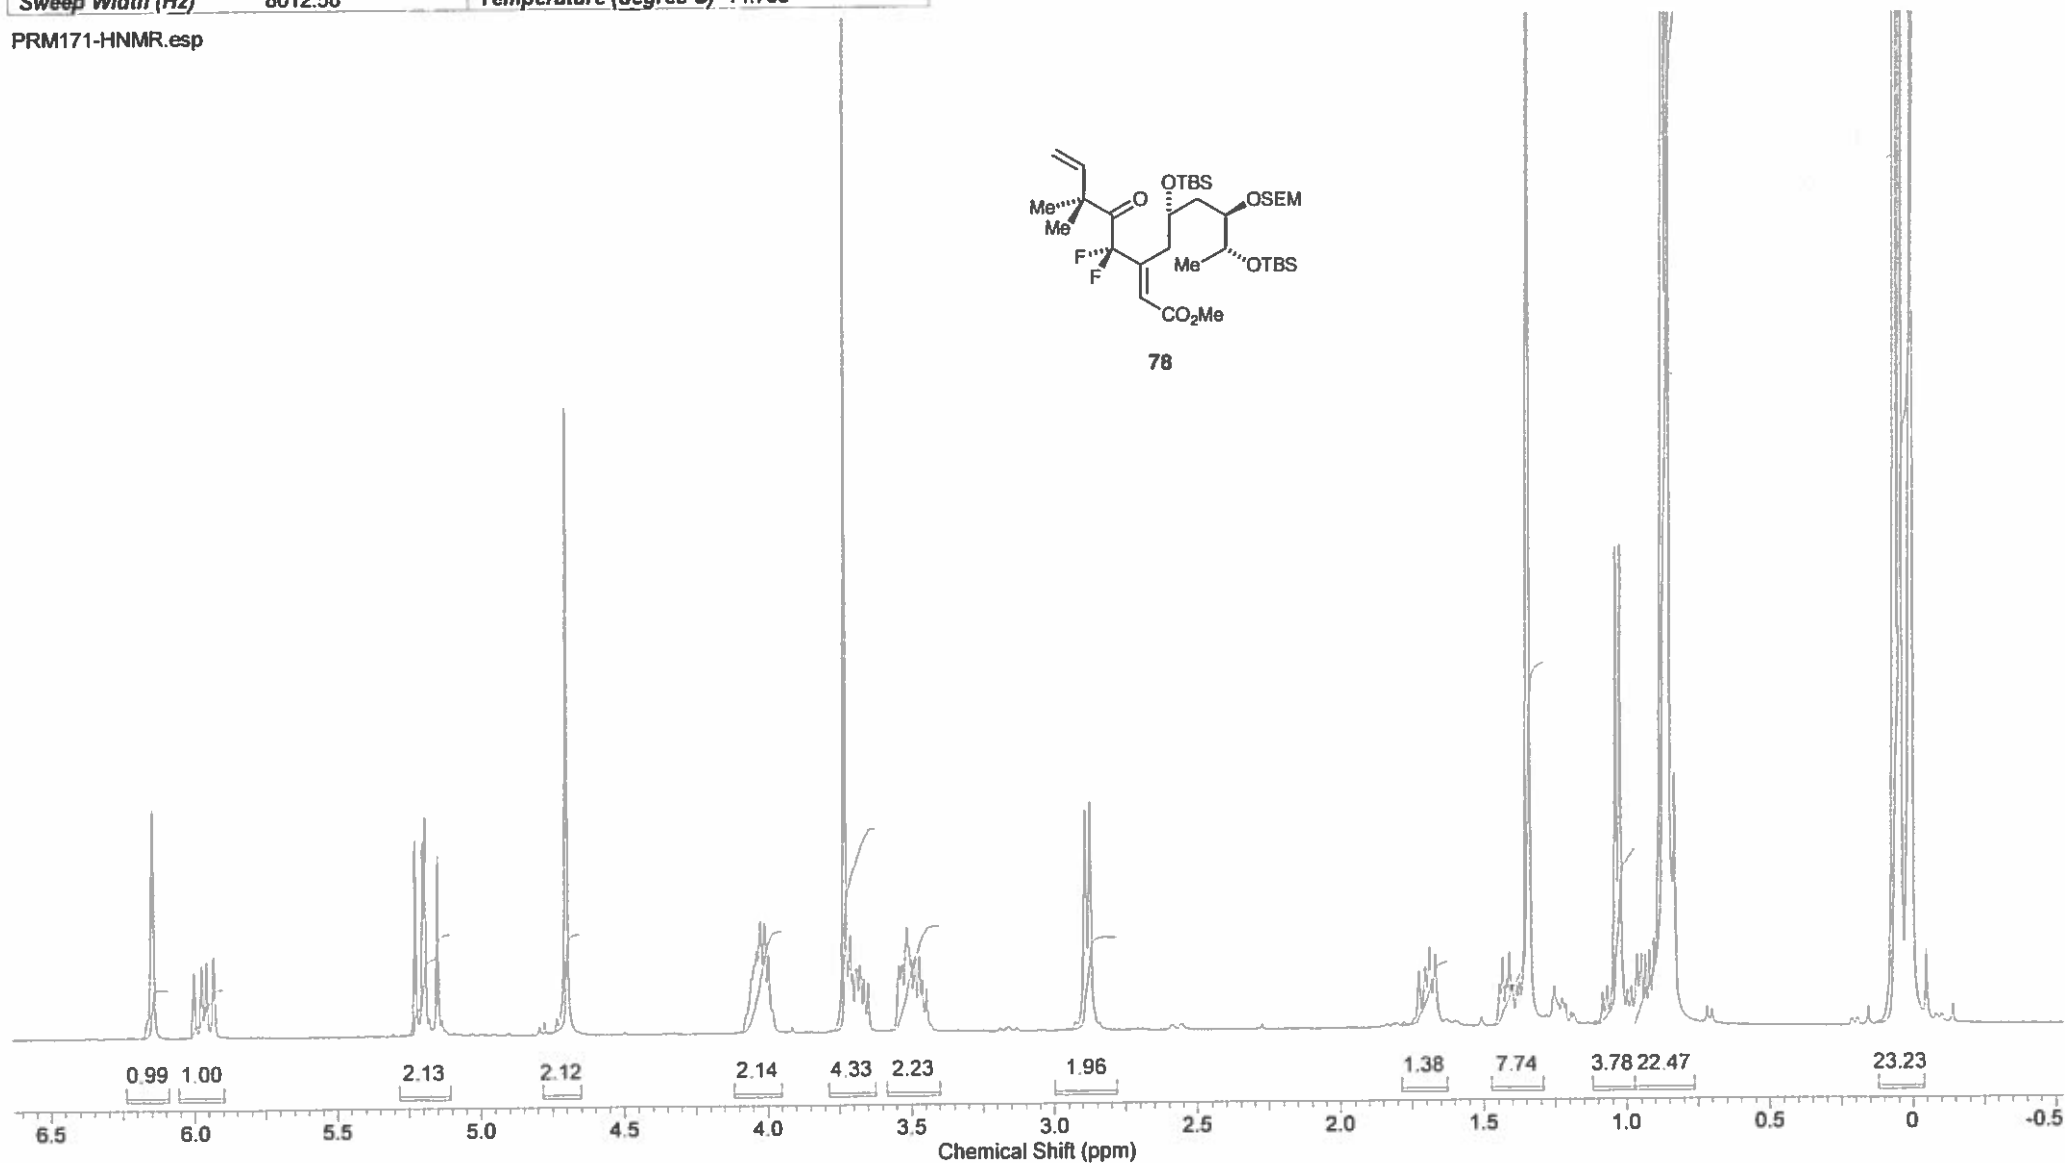

0215-106

Mears P.

EJT-PRM 171 f3-9

50 mg

mCARBON CDCl3 (E:\bruk500edata\2015\Feb) staff-22

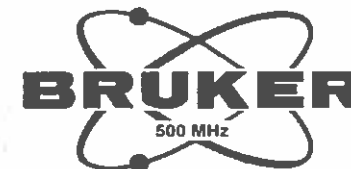

Current Data Parameters  
NAME 2015-02-04-staff-22  
EXPNO 11  
PROCNO 1

F2 - Acquisition Parameters  
Date\_ 20150205  
Time\_ 0.34  
INSTRUM spect  
PROBHD 5 mm CPPBBO BB  
PULPROG zgpg30  
TD 65536  
SOLVENT CDCl3  
NS 2048  
DS 4  
SWH 29761.904 Hz  
FIDRES 0.454131 Hz  
AQ 1.1010048 sec  
RG 184.4  
DW 16.800 usec  
DE 102.82 usec  
TE 295.2 K  
D1 2.00000000 sec  
D11 0.03000000 sec  
TD0 1

===== CHANNEL f1 =====  
SFO1 125.7854504 MHz  
NUC1 13C  
P1 10.00 usec  
PLW1 53.59999847 W

===== CHANNEL f2 =====  
SFO2 500.1920008 MHz  
NUC2 1H  
CPDPRG[2] waltz16  
PCPD2 80.00 usec  
PLW2 16.00000000 W  
PLW12 0.28622001 W  
PLW13 0.18318000 W

F2 - Processing parameters  
SI 32768  
SF 125.7726934 MHz  
WDW EM  
SSB 0  
LB 1.00 Hz  
GB 0  
PC 1.40

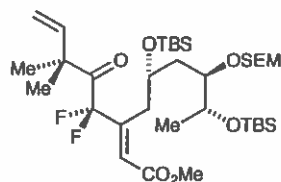

78

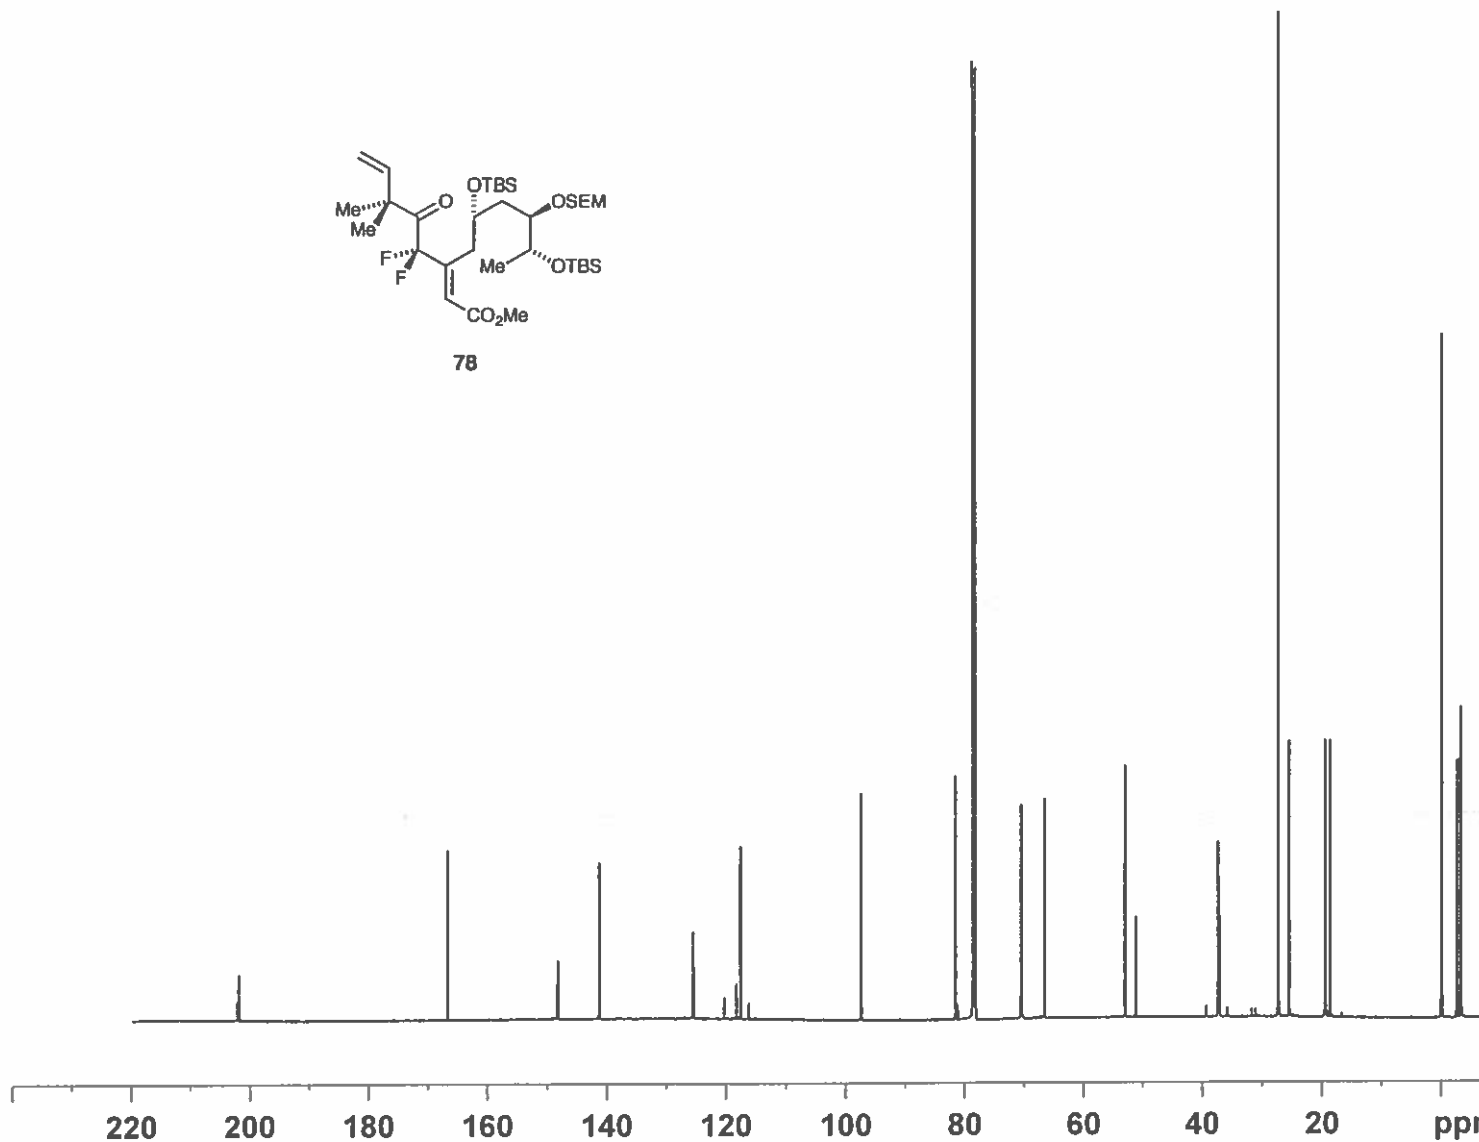



This report was created by ACD/NMR Processor Academic Edition. For more information go to [www.acdlabs.com/nmrproc/](http://www.acdlabs.com/nmrproc/)

This report was created by ACD/NAME Processor Academic Edition. For more information go to [www.acdlabs.com/nmrprod](http://www.acdlabs.com/nmrprod)

|                        |                                                                                                          |                        |                                                                       |                      |             |                       |          |
|------------------------|----------------------------------------------------------------------------------------------------------|------------------------|-----------------------------------------------------------------------|----------------------|-------------|-----------------------|----------|
| Acquisition Time (sec) | 0.7340                                                                                                   | Comment                | EJT-PRM171 f4-18 57mg mF19CPD CDCl3 (e:\bruk400adata\2015\Feb) ejt 55 |                      |             |                       |          |
| Date                   | 02 Feb 2015 12:45:52                                                                                     | Date Stamp             | 02 Feb 2015 12:45:52                                                  |                      |             |                       |          |
| File Name              | \\ss7a.ds.man.ac.uk\vol5\vol3\users\snmrdata\bruk400adata\2015\Feb\data\ejt\nmr\2015-02-02-ejt-55\13\fid |                        |                                                                       |                      |             | Frequency (MHz)       | 376.50   |
| Nucleus                | 19F                                                                                                      | Number of Transients   | 16                                                                    | Origin               | AV400       | Original Points Count | 65536    |
| Owner                  | nmrsu                                                                                                    | Points Count           | 65536                                                                 | Pulse Sequence       | zgig        | Receiver Gain         | 203.00   |
| SW(cyclical) (Hz)      | 89285.71                                                                                                 | Solvent                | CHLOROFORM-d                                                          | Spectrum Offset (Hz) | -37649.5977 | Spectrum Type         | STANDARD |
| Sweep Width (Hz)       | 89284.35                                                                                                 | Temperature (degree C) | 23.000                                                                |                      |             |                       |          |

PRM171-F(1H)NMR.esp

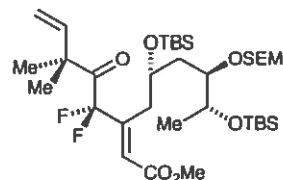

78

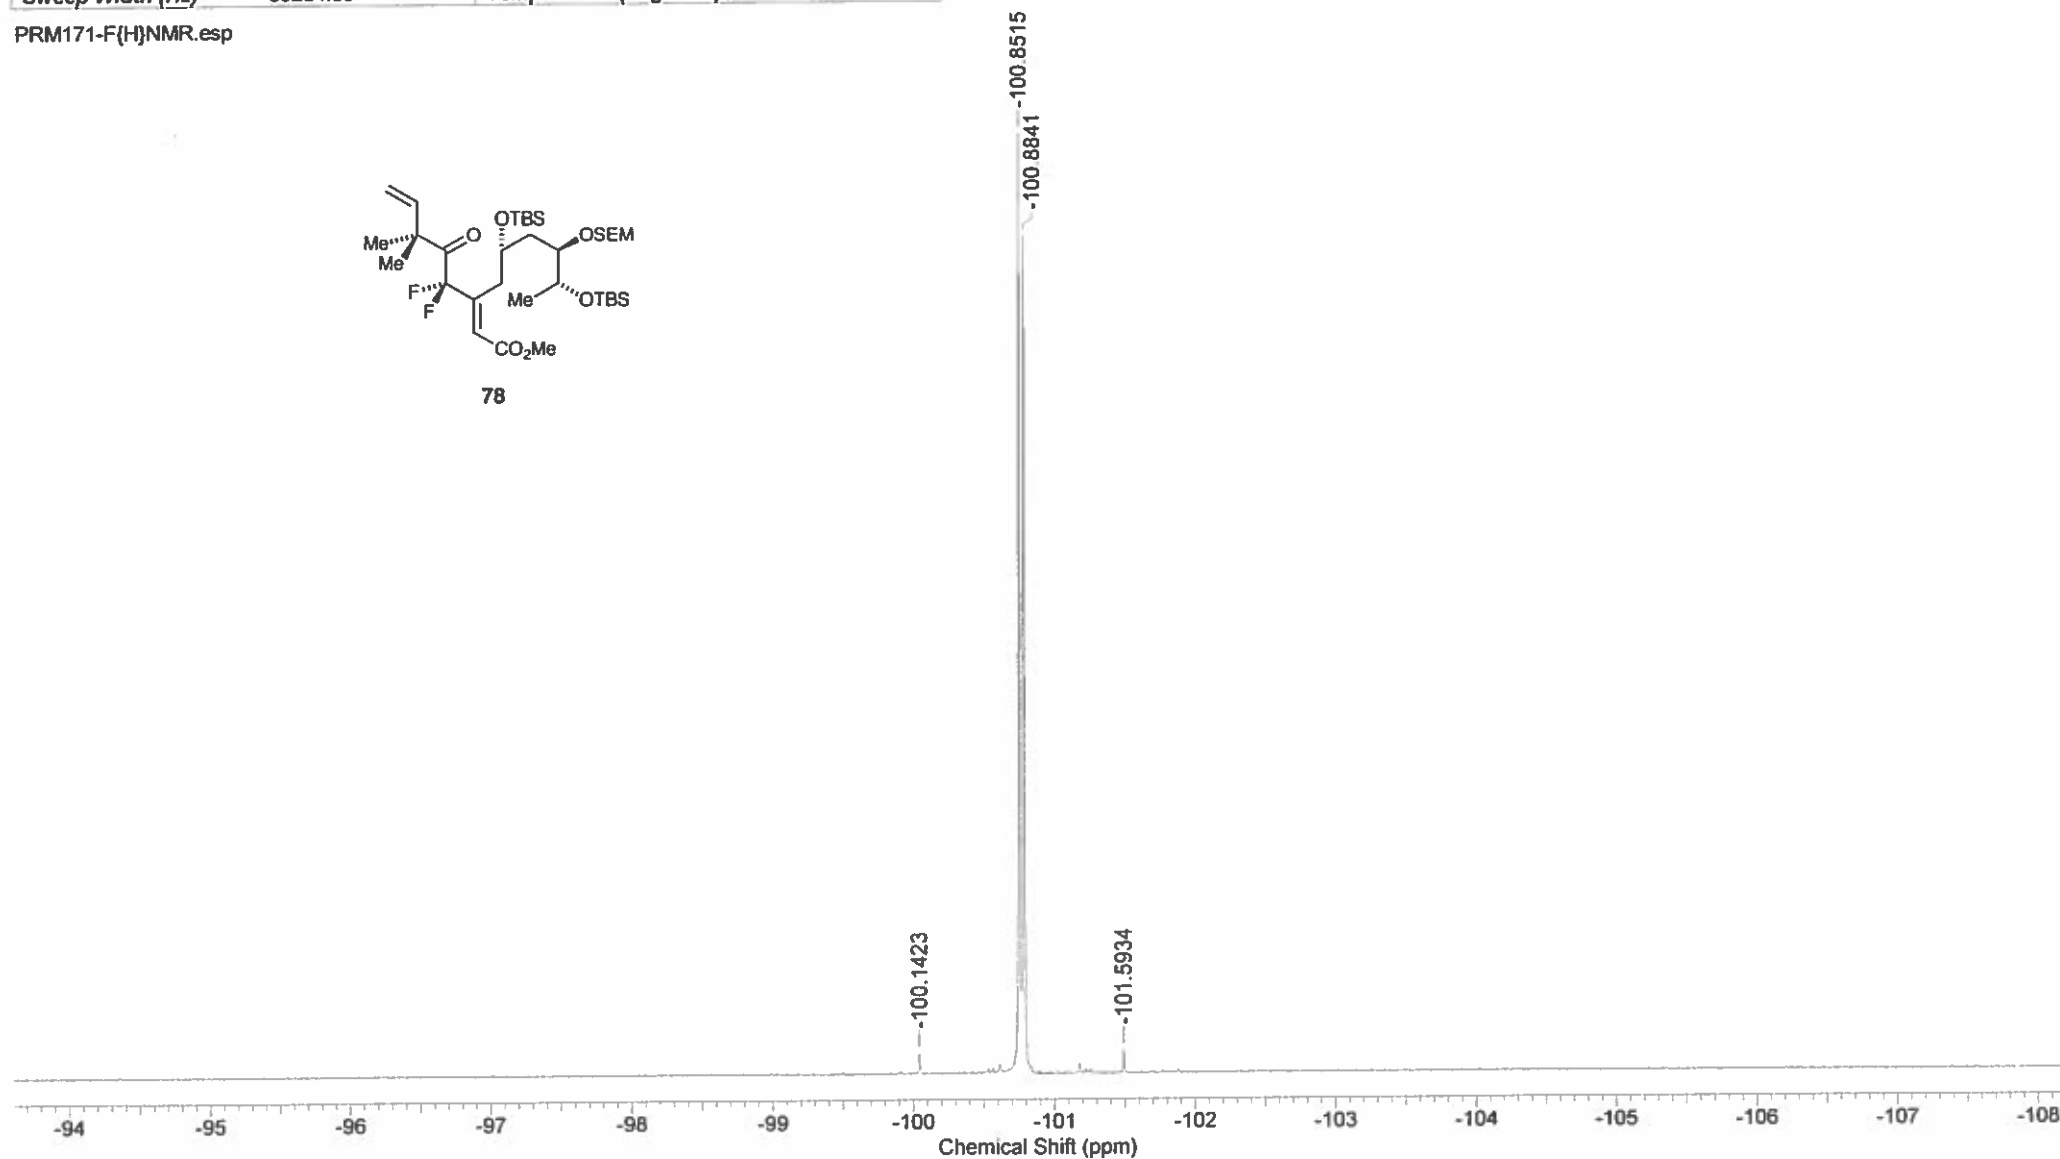

This report was created by ACD/NMR Processor Academic Edition. For more information go to [www.acdlabs.com/nmrproc/](http://www.acdlabs.com/nmrproc/)

|                        |                                                                                                   |                        |                                                                         |                      |           |
|------------------------|---------------------------------------------------------------------------------------------------|------------------------|-------------------------------------------------------------------------|----------------------|-----------|
| Acquisition Time (sec) | 4.0894                                                                                            | Comment                | EJT-PRM173 f6-22 29mg mPROTON A CDCl3 (e:\bruk400cdata\2015\Feb) ejt 14 |                      |           |
| Date                   | 12 Feb 2015 16:00:00                                                                              | Date Stamp             | 12 Feb 2015 16:00:00                                                    |                      |           |
| File Name              | \\ss7a.ds.man.ac.uk\vol5\vol3\users\snmrdata\bruk400cdata\2015\Feb\data\ejt\173\173-14\173-14.fid |                        |                                                                         | Frequency (MHz)      | 400.07    |
| Nucleus                | <sup>1</sup> H                                                                                    | Number of Transients   | 16                                                                      | Origin               | spect     |
| Owner                  | nmrsu                                                                                             | Points Count           | 32768                                                                   | Pulse Sequence       | zg30      |
| SW(cyclical) (Hz)      | 8012.82                                                                                           | Solvent                | CHLOROFORM-d                                                            | Receiver Gain        | 32.00     |
| Sweep Width (Hz)       | 8012.58                                                                                           | Temperature (degree C) | 14.915                                                                  | Spectrum Offset (Hz) | 1893.8241 |
|                        |                                                                                                   |                        |                                                                         | Spectrum Type        | STANDARD  |

PRM173-HNMR.esp

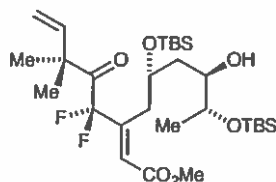

79

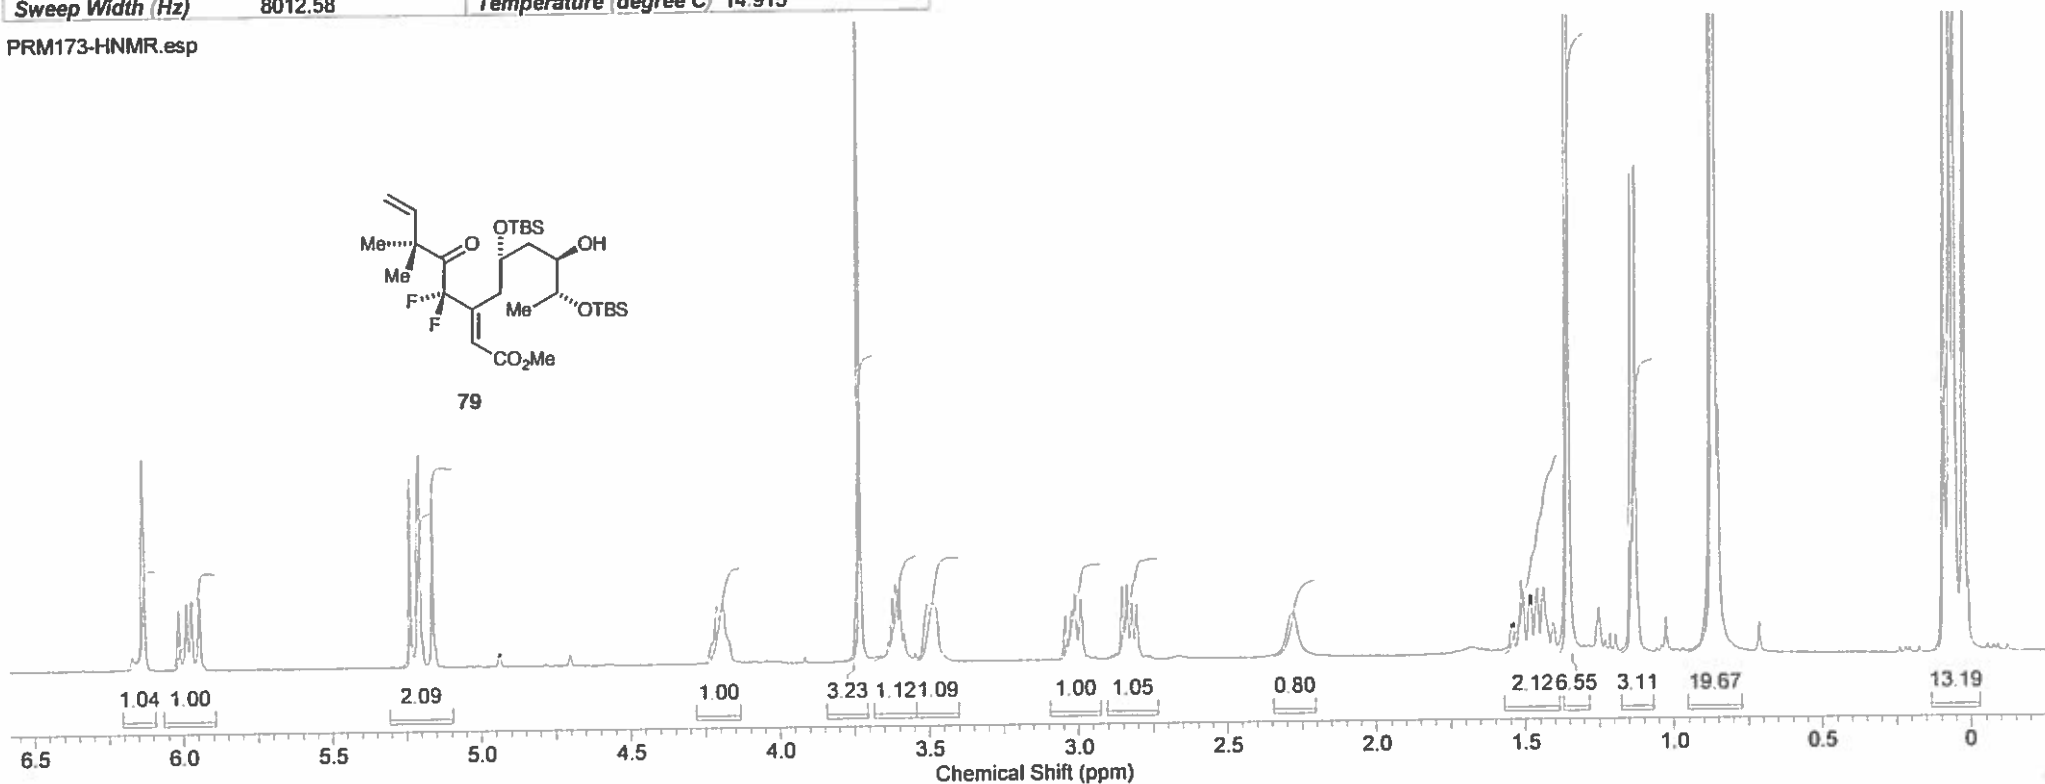

| No. | (ppm)        | Value      | Absolute Value | Non-Negative Value | No. | (ppm)        | Value      | Absolute Value | Non-Negative Value |
|-----|--------------|------------|----------------|--------------------|-----|--------------|------------|----------------|--------------------|
| 1   | 0300 .. 0.13 | 3.19273376 | 2.20347003e+10 | 13.19273376        | 9   | 4009 .. 3.54 | 1.08516133 | 1.81245261e+9  | 1.08516133         |
| 2   | 7731 .. 0.95 | 9.67392731 | 3.28596849e+10 | 19.67392731        | 10  | 5430 .. 3.68 | 1.11831653 | 1.86782886e+9  | 1.11831653         |
| 3   | 0681 .. 1.17 | 3.11152554 | 5.19691622e+9  | 3.11152554         | 11  | 3850 .. 3.82 | 3.23063946 | 5.39586202e+9  | 3.23063946         |
| 4   | 2976 .. 1.38 | 6.54978418 | 1.09395466e+10 | 6.54978418         | 12  | 1330 .. 4.28 | 0.99953032 | 1.66943040e+9  | 0.99953032         |
| 5   | 3850 .. 1.57 | 2.12479234 | 3.54885965e+9  | 2.12479234         | 13  | 0945 .. 5.30 | 2.08711100 | 3.48592358e+9  | 2.08711100         |
| 6   | 2045 .. 2.34 | 0.80205345 | 1.33960154e+9  | 0.80205345         | 14  | 3922 .. 6.06 | 0.99999589 | 1.67020800e+9  | 0.99999589         |
| 7   | 7344 .. 2.90 | 1.04649985 | 1.74787955e+9  | 1.04649985         | 15  | 0943 .. 6.20 | 1.03641319 | 1.73103270e+9  | 1.03641319         |
| 8   | 3256 .. 3.09 | 0.99720508 | 1.66554675e+9  | 0.99720508         |     |              |            |                |                    |

EJT-PRM173 f6-22 29mg  
mCARBON CDCl3 {E:\bruk500cdata\2015\Feb) staff 57

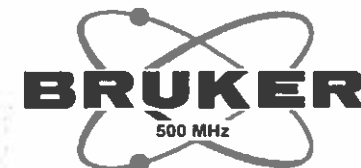

Current Data Parameters  
NAME 2015-02-13-staff-57  
EXPNO 11  
PROCNO 1

F2 - Acquisition Parameters  
Date 20150214  
Time 17.32  
INSTRUM spect  
PROBHD 5 mm CPPBBO BB  
PULPROG zgpg30  
TD 65536  
SOLVENT CDCl3  
NS 30000  
DS 4  
SWH 29761.904 Hz  
FIDRES 0.454131 Hz  
AQ 1.1010048 sec  
RG 184.4  
DW 16.800 usec  
DE 102.82 usec  
TE 295.2 K  
D1 2.00000000 sec  
D11 0.03000000 sec  
TD0 1

===== CHANNEL f1 =====  
SFO1 125.7854504 MHz  
NUC1 13C  
P1 10.00 usec  
PLW1 53.59999847 W

===== CHANNEL f2 =====  
SFO2 500.1920008 MHz  
NUC2 1H  
CPDPRG[2] waltz16  
PCPD2 80.00 usec  
PLW2 16.00000000 W  
PLW12 0.28622001 W  
PLW13 0.18318000 W

F2 - Processing parameters  
SI 32768  
SF 125.7726936 MHz  
WDW EM  
SSB 0  
LB 1.00 Hz  
GB 0  
PC 1.40

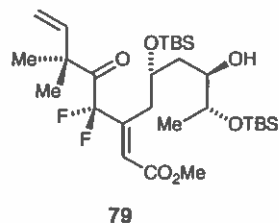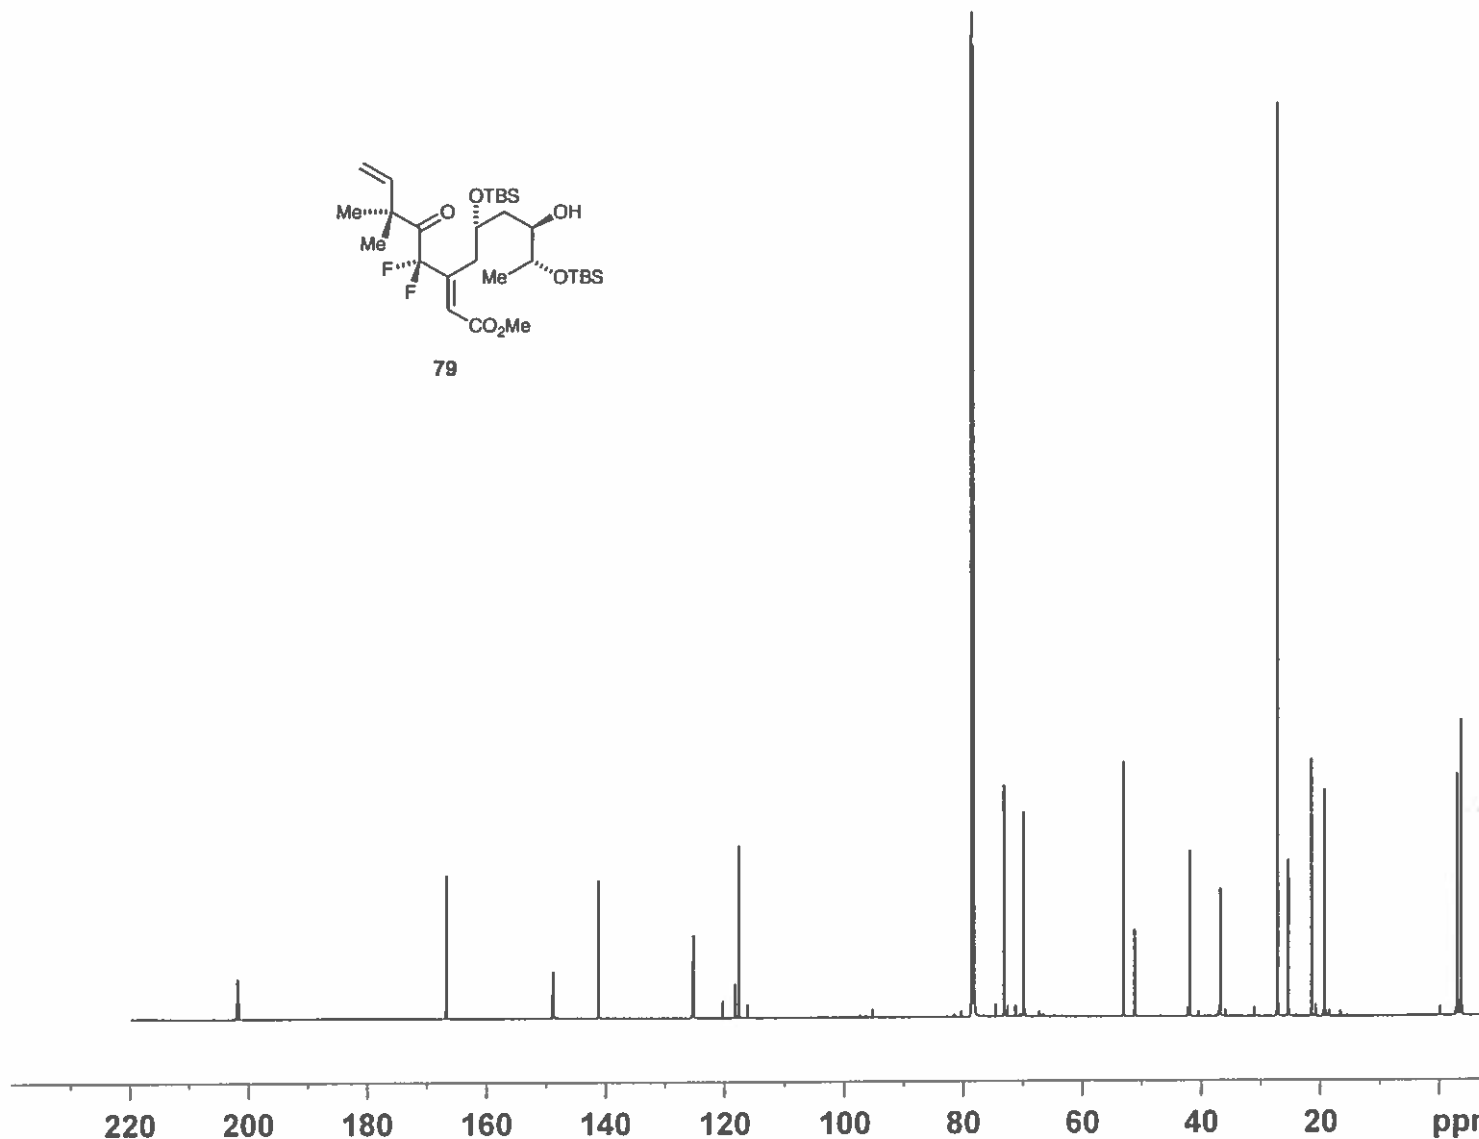

This report was created by ACD/NMR Processor Academic Edition. For more information go to [www.acdlabs.com/nmrproc/](http://www.acdlabs.com/nmrproc/)

|                                                                                                                                                                                      |                                                                                                          |                        |                                                                              |                      |             |                       |          |  |  |
|--------------------------------------------------------------------------------------------------------------------------------------------------------------------------------------|----------------------------------------------------------------------------------------------------------|------------------------|------------------------------------------------------------------------------|----------------------|-------------|-----------------------|----------|--|--|
| This report was created by ACD/NMR Processor Academic Edition. For more information go to <a href="http://www.accdatabase.com/nmr/processor/">www.accdatabase.com/nmr/processor/</a> |                                                                                                          |                        |                                                                              |                      |             |                       |          |  |  |
| Acquisition Time (sec)                                                                                                                                                               | 0.7340                                                                                                   | Comment                | EJT-PRM173 f6-22 29mg mF19_cryo_zgbs CDCI3 (e:\bruk400cdata\2015\Feb) ejt 14 |                      |             |                       |          |  |  |
| Date                                                                                                                                                                                 | 12 Feb 2015 16:02:08                                                                                     | Date Stamp             | 12 Feb 2015 16:02:08                                                         |                      |             |                       |          |  |  |
| File Name                                                                                                                                                                            | \\ss7a.ds.man.ac.uk\vol5\vol3\users\snmrdata\bruk400cdata\2015\Feb\data\ejt\nmr\2015-02-12-ejt-14\11\fid |                        | Frequency (MHz)                                                              | 376.44               |             |                       |          |  |  |
| Nucleus                                                                                                                                                                              | 19F                                                                                                      | Number of Transients   | 16                                                                           | Origin               | spect       | Original Points Count | 65536    |  |  |
| Owner                                                                                                                                                                                | nmrsu                                                                                                    | Points Count           | 65536                                                                        | Pulse Sequence       | zgbs        | Receiver Gain         | 7.12     |  |  |
| SW(cyclical) (Hz)                                                                                                                                                                    | 89285.71                                                                                                 | Solvent                | CHLOROFORM-d                                                                 | Spectrum Offset (Hz) | -37644.8594 | Spectrum Type         | STANDARD |  |  |
| Sweep Width (Hz)                                                                                                                                                                     | 89284.35                                                                                                 | Temperature (degree C) | 14.924                                                                       |                      |             |                       |          |  |  |

PRM173-FNMR.esp

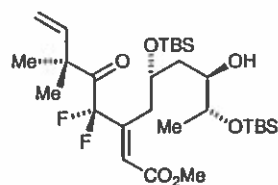

79

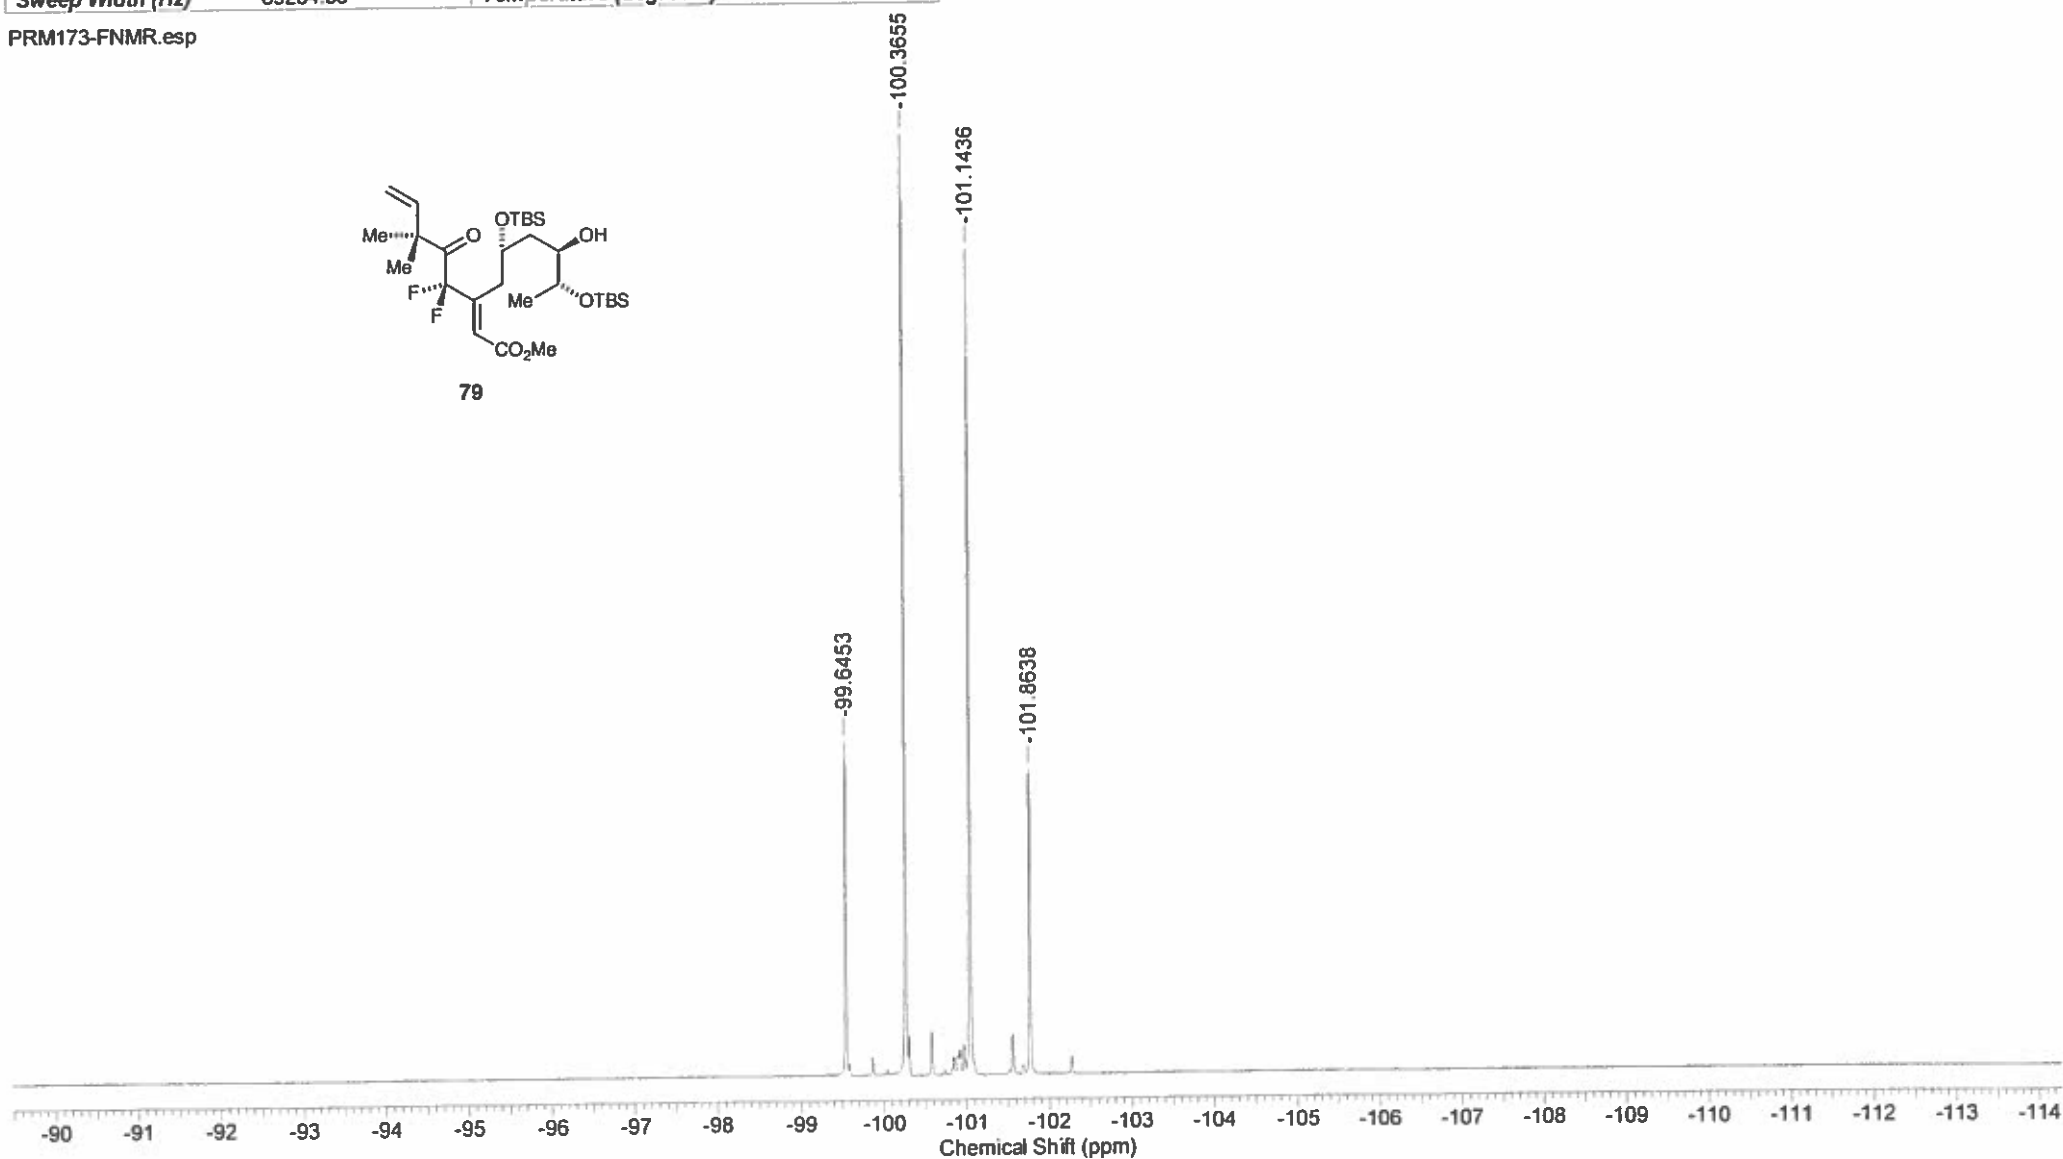

This report was created by ACD/NMR Processor Academic Edition. For more information go to [www.acdlabs.com/nmrproc/](http://www.acdlabs.com/nmrproc/)

|                        |                                                                                                                     |                        |                                                                                                    |                      |           |
|------------------------|---------------------------------------------------------------------------------------------------------------------|------------------------|----------------------------------------------------------------------------------------------------|----------------------|-----------|
| Acquisition Time (sec) | 3.2768                                                                                                              | Comment                | 0215 121 Mears P EJT-PRM174 F5-15 26 mg in CDCl3 mPROTON CDCl3 (E:\bruk500cdata\2015\Feb) staff 39 |                      |           |
| Date                   | 24 Feb 2015 02:14:24                                                                                                | Date Stamp             | 24 Feb 2015 02:14:24                                                                               |                      |           |
| File Name              | \\ss7a.ds.man.ac.uk\vol5\vol3\users\snmrdata\bruk500cdata\2015\Feb\data\staff\nmr\2015-02-23-staff-39\10\PDATA\1\1r |                        |                                                                                                    | Frequency (MHz)      | 500.19    |
| Nucleus                | 1H                                                                                                                  | Number of Transients   | 16                                                                                                 | Origin               | spect     |
| Owner                  | nmrsu                                                                                                               | Points Count           | 65536                                                                                              | Pulse Sequence       | zg30      |
| SW(cyclical) (Hz)      | 10000.00                                                                                                            | Solvent                | CHLOROFORM-d                                                                                       | Spectrum Offset (Hz) | 3081.8008 |
| Sweep Width (Hz)       | 9999.85                                                                                                             | Temperature (degree C) | 22.154                                                                                             | Receiver Gain        | 30.53     |
|                        |                                                                                                                     |                        |                                                                                                    | Spectrum Type        | STANDARD  |

PRM174-HNMR.esp

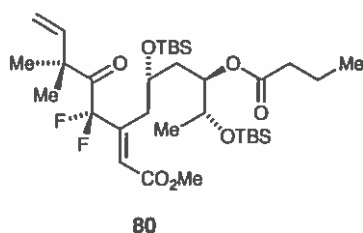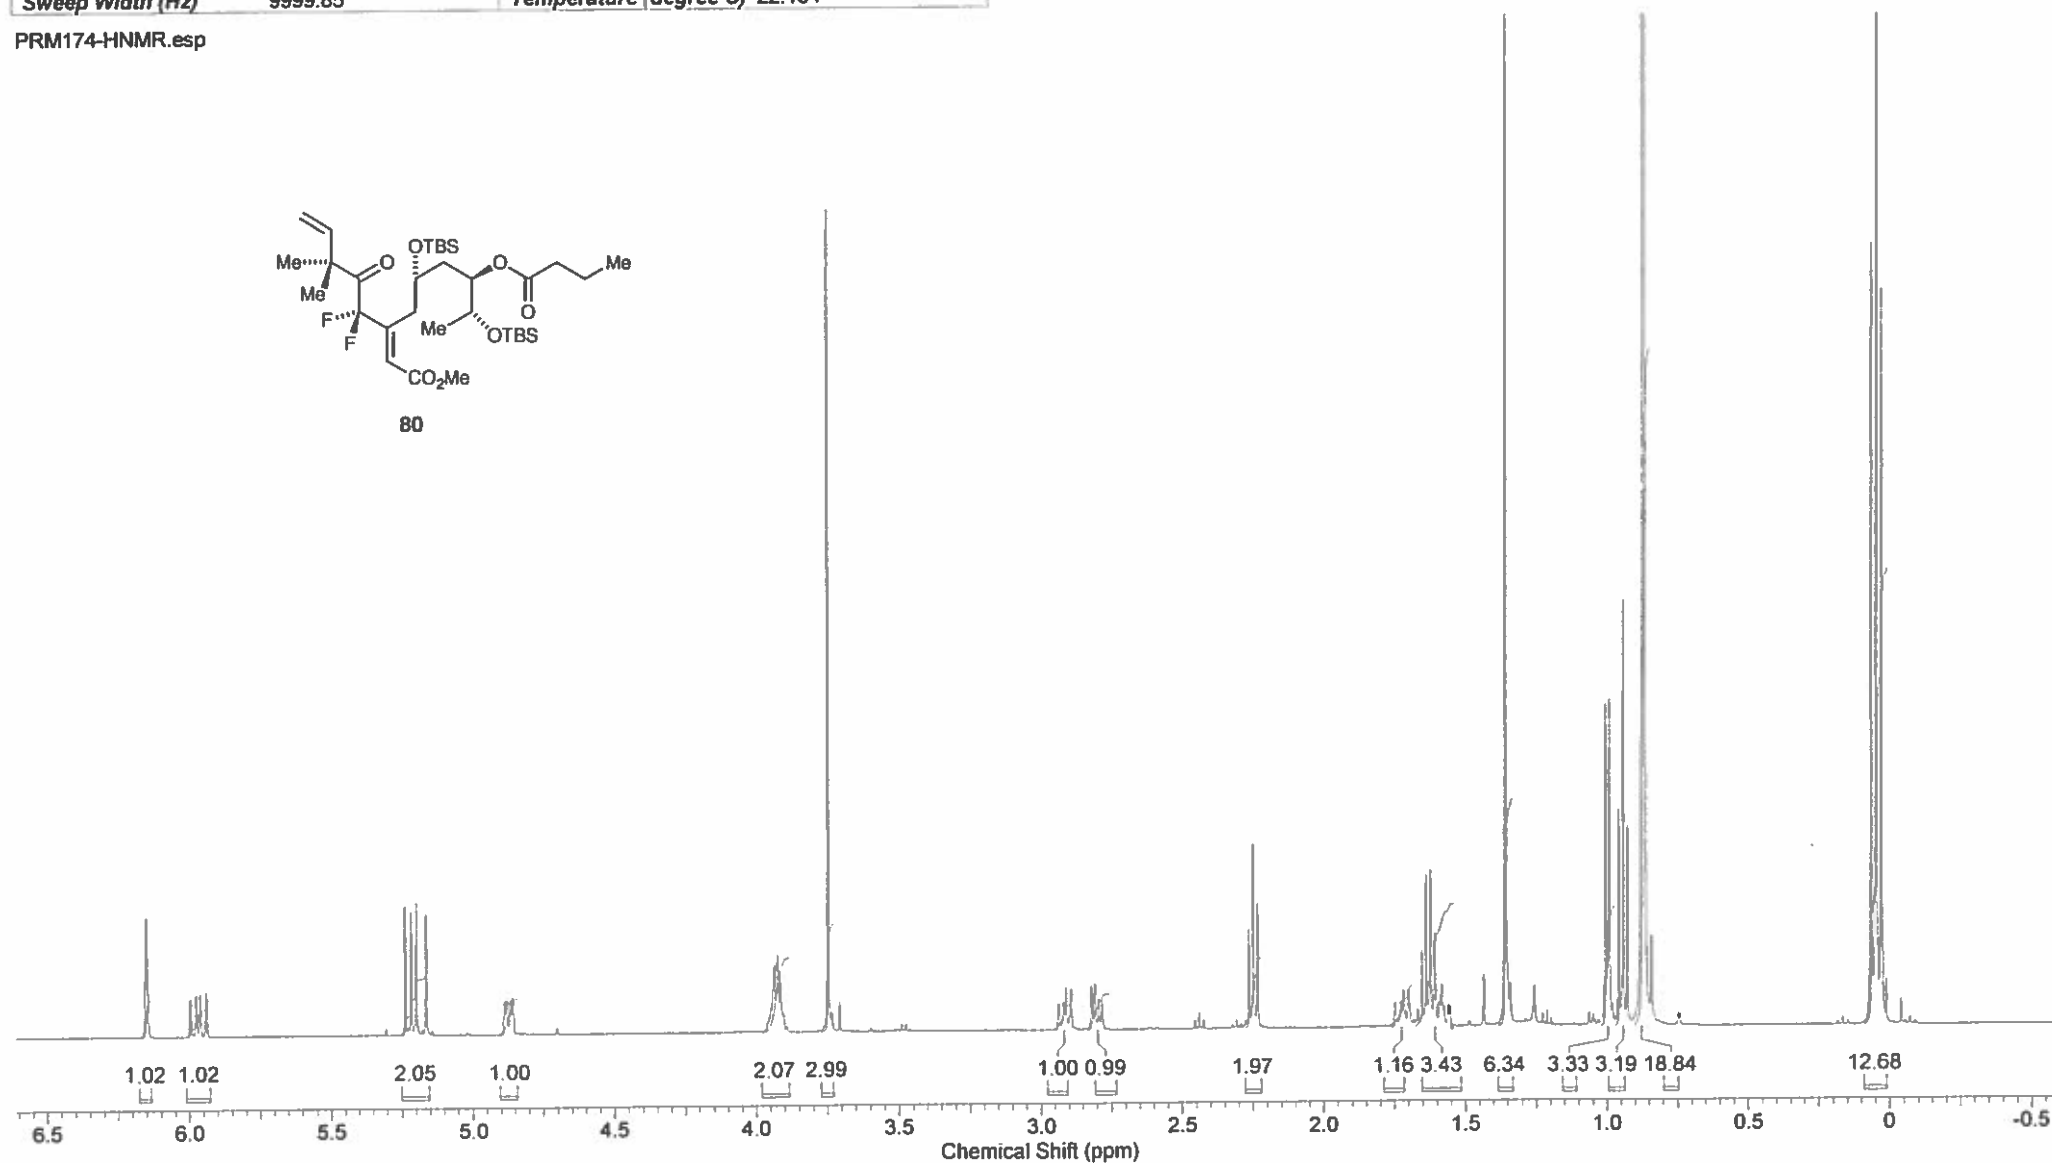

0215 121

Mears P

EJT-PRM174 F5-15

26 mg in CDCl<sub>3</sub>

mCARBON CDCl<sub>3</sub> (E:\bruk500edata\2015\Feb\staff-39

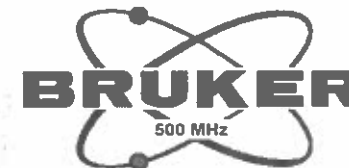

Current Data Parameters

NAME 2015-02-23-staff-39  
EXPNO 11  
PROCNO 1

F2 - Acquisition Parameters

Date 20150224  
Time 10.14  
INSTRUM spect  
PROBHD 5 mm CPPBBO BB  
PULPROG zgpg30  
TD 65536  
SOLVENT CDCl<sub>3</sub>  
NS 9223  
DS 4  
SWH 29761.904 Hz  
FIDRES 0.454131 Hz  
AQ 1.1010048 sec  
RG 184.4  
DW 16.800 usec  
DE 102.82 usec  
TE 295.2 K  
D1 2.00000000 sec  
D11 0.03000000 sec  
TD0 1

===== CHANNEL f1 =====

SFO1 125.7854504 MHz  
NUC1 13C  
P1 10.00 usec  
PLW1 53.59999847 W

===== CHANNEL f2 =====

SFO2 500.1920008 MHz  
NUC2 1H  
CPDPRG2 waltz16  
PCPD2 80.00 usec  
PLW2 16.00000000 W  
PLW12 0.28622001 W  
PLW13 0.18318000 W

F2 - Processing parameters

SI 32768  
SF 125.7726933 MHz  
WDW EM  
SSB 0  
LB 1.00 Hz  
GB 0  
PC 1.40

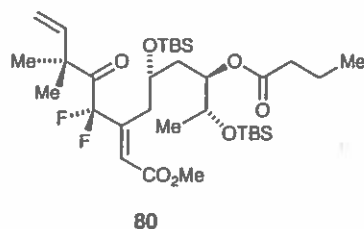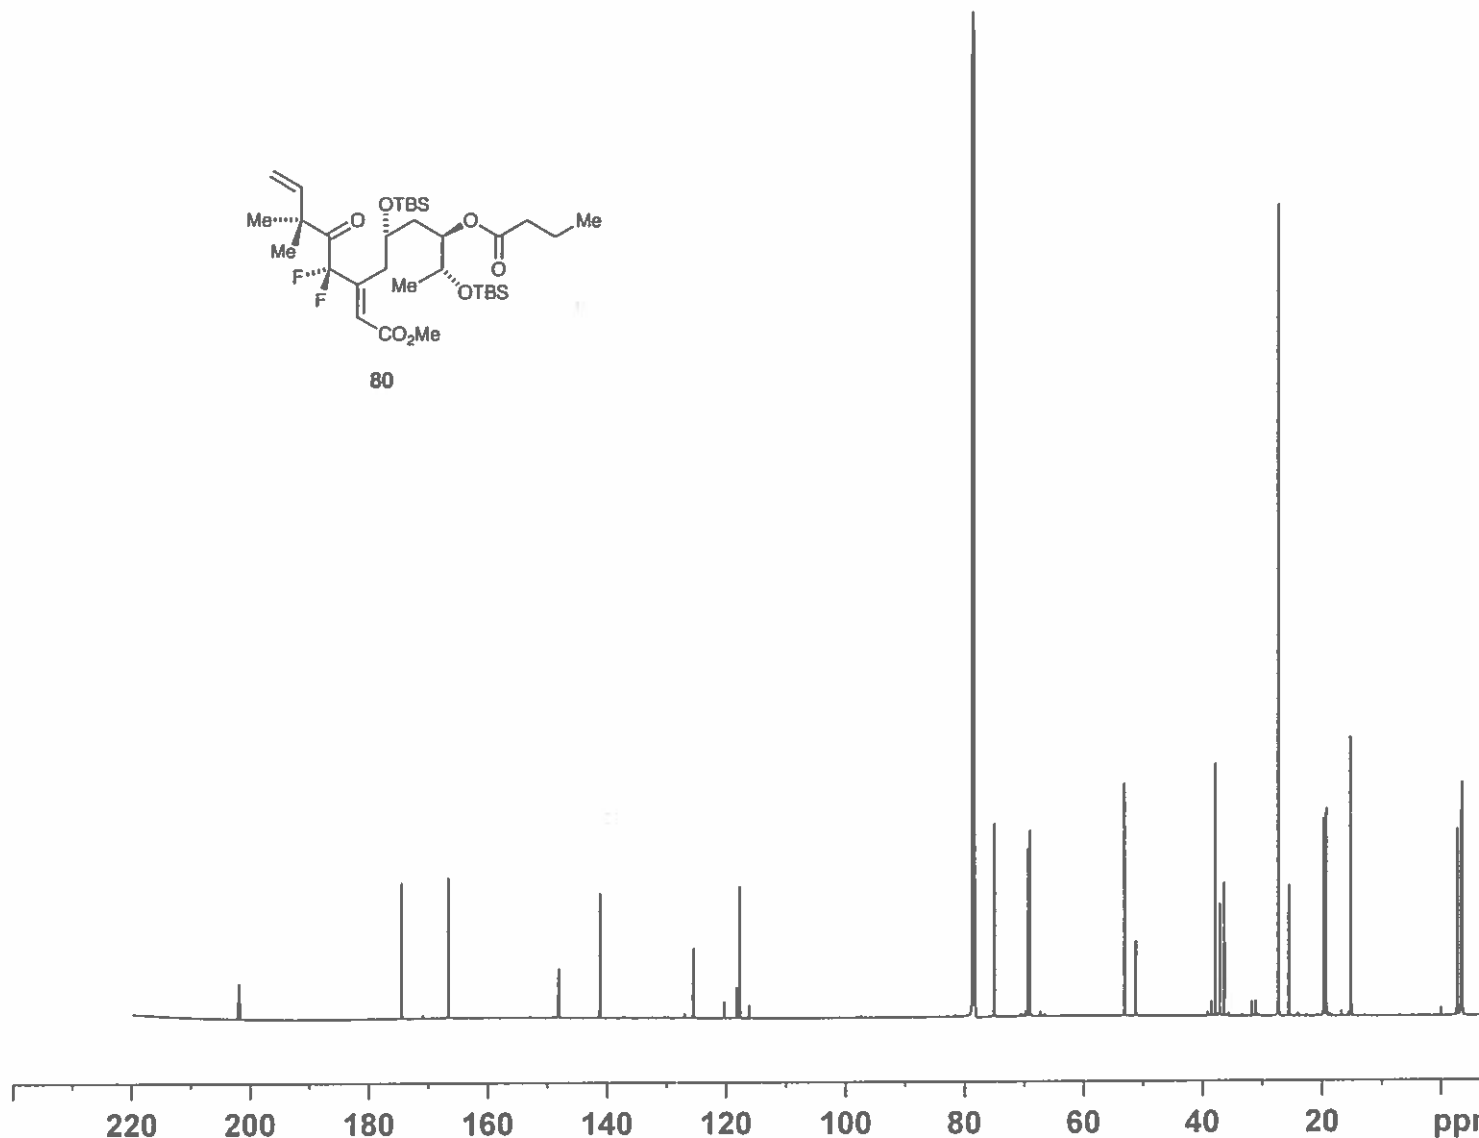

This report was created by ACD/NMR Processor Academic Edition. For more information go to [www.acdlabs.com/nmrproc/](http://www.acdlabs.com/nmrproc/)

|                        |                                                                                                          |                        |                                                                       |                      |             |
|------------------------|----------------------------------------------------------------------------------------------------------|------------------------|-----------------------------------------------------------------------|----------------------|-------------|
| Acquisition Time (sec) | 0.7340                                                                                                   | Comment                | EJT-PRM174 f5-15 26mg mF19CPD CDCl3 (e:\bruk400adata\2015\Feb) ejt 58 |                      |             |
| Date                   | 23 Feb 2015 15:30:08                                                                                     | Date Stamp             | 23 Feb 2015 15:30:08                                                  |                      |             |
| File Name              | \\ss7a.ds.man.ac.uk\vol5\vol3\users\snmrdata\bruk400adata\2015\Feb\data\ejt\nmr\2015-02-23-ejt-58\12\fid |                        |                                                                       | Frequency (MHz)      | 376.50      |
| Nucleus                | 19F                                                                                                      | Number of Transients   | 16                                                                    | Origin               | AV400       |
| Owner                  | nmrsu                                                                                                    | Points Count           | 65536                                                                 | Pulse Sequence       | zgpg        |
| SW(cyclical) (Hz)      | 89285.71                                                                                                 | Solvent                | CHLOROFORM-d                                                          | Spectrum Offset (Hz) | -37649.5977 |
| Sweep Width (Hz)       | 89284.35                                                                                                 | Temperature (degree C) | 19.900                                                                | Receiver Gain        | 203.00      |
|                        |                                                                                                          |                        |                                                                       | Spectrum Type        | STANDARD    |

PRM174-F{H}NMR.esp

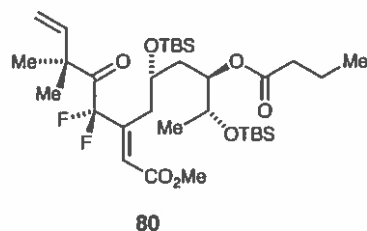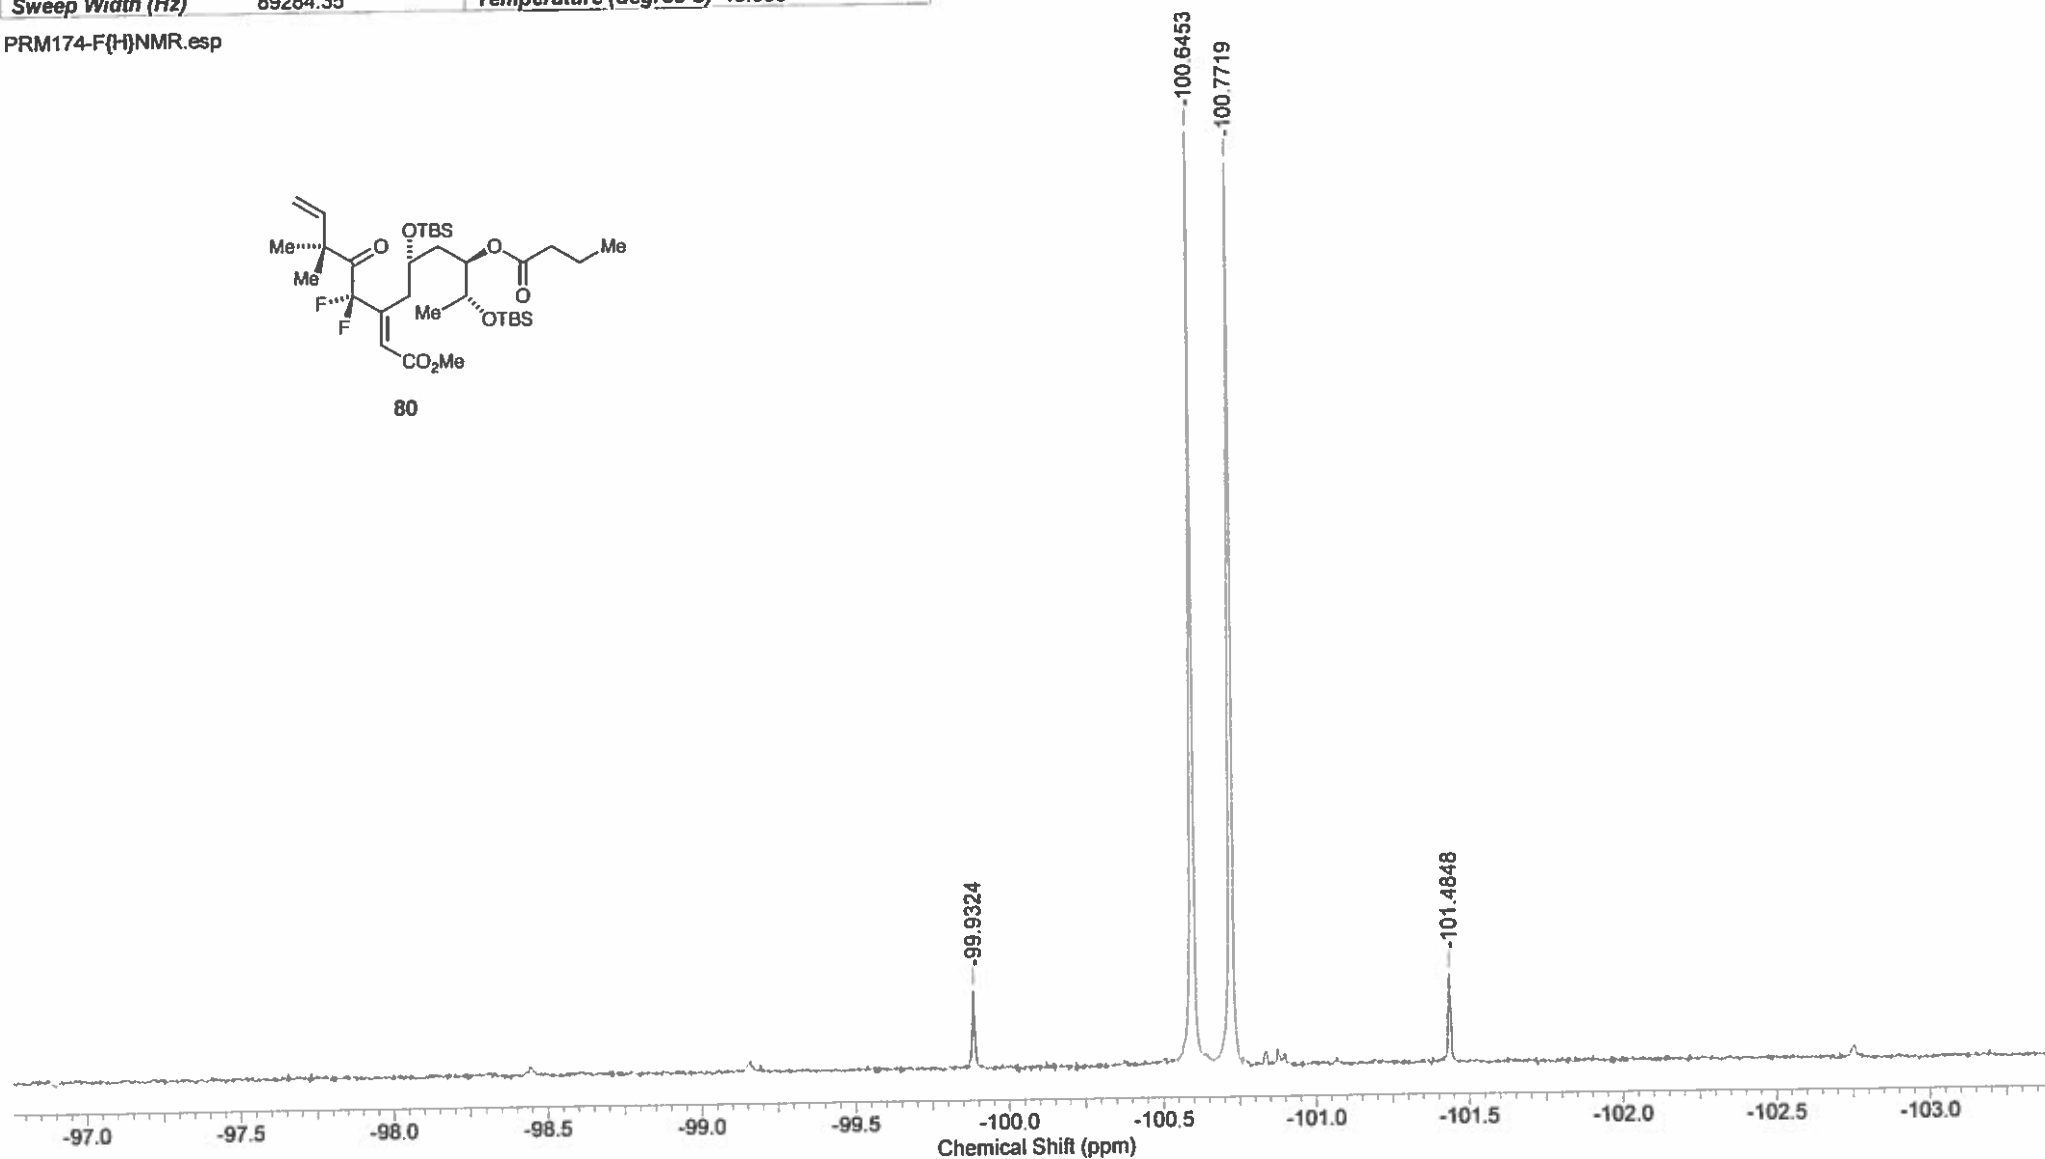

20151218-1648-B500\_B.14#17-001  
 Research Group Thomas\_J  
 Sample Reference ETJ-SH029  
 AcqH1\_day CDCl3 {E:\nmrdata\Thomas\_J} mbdxksh3 17

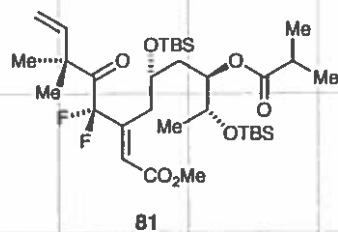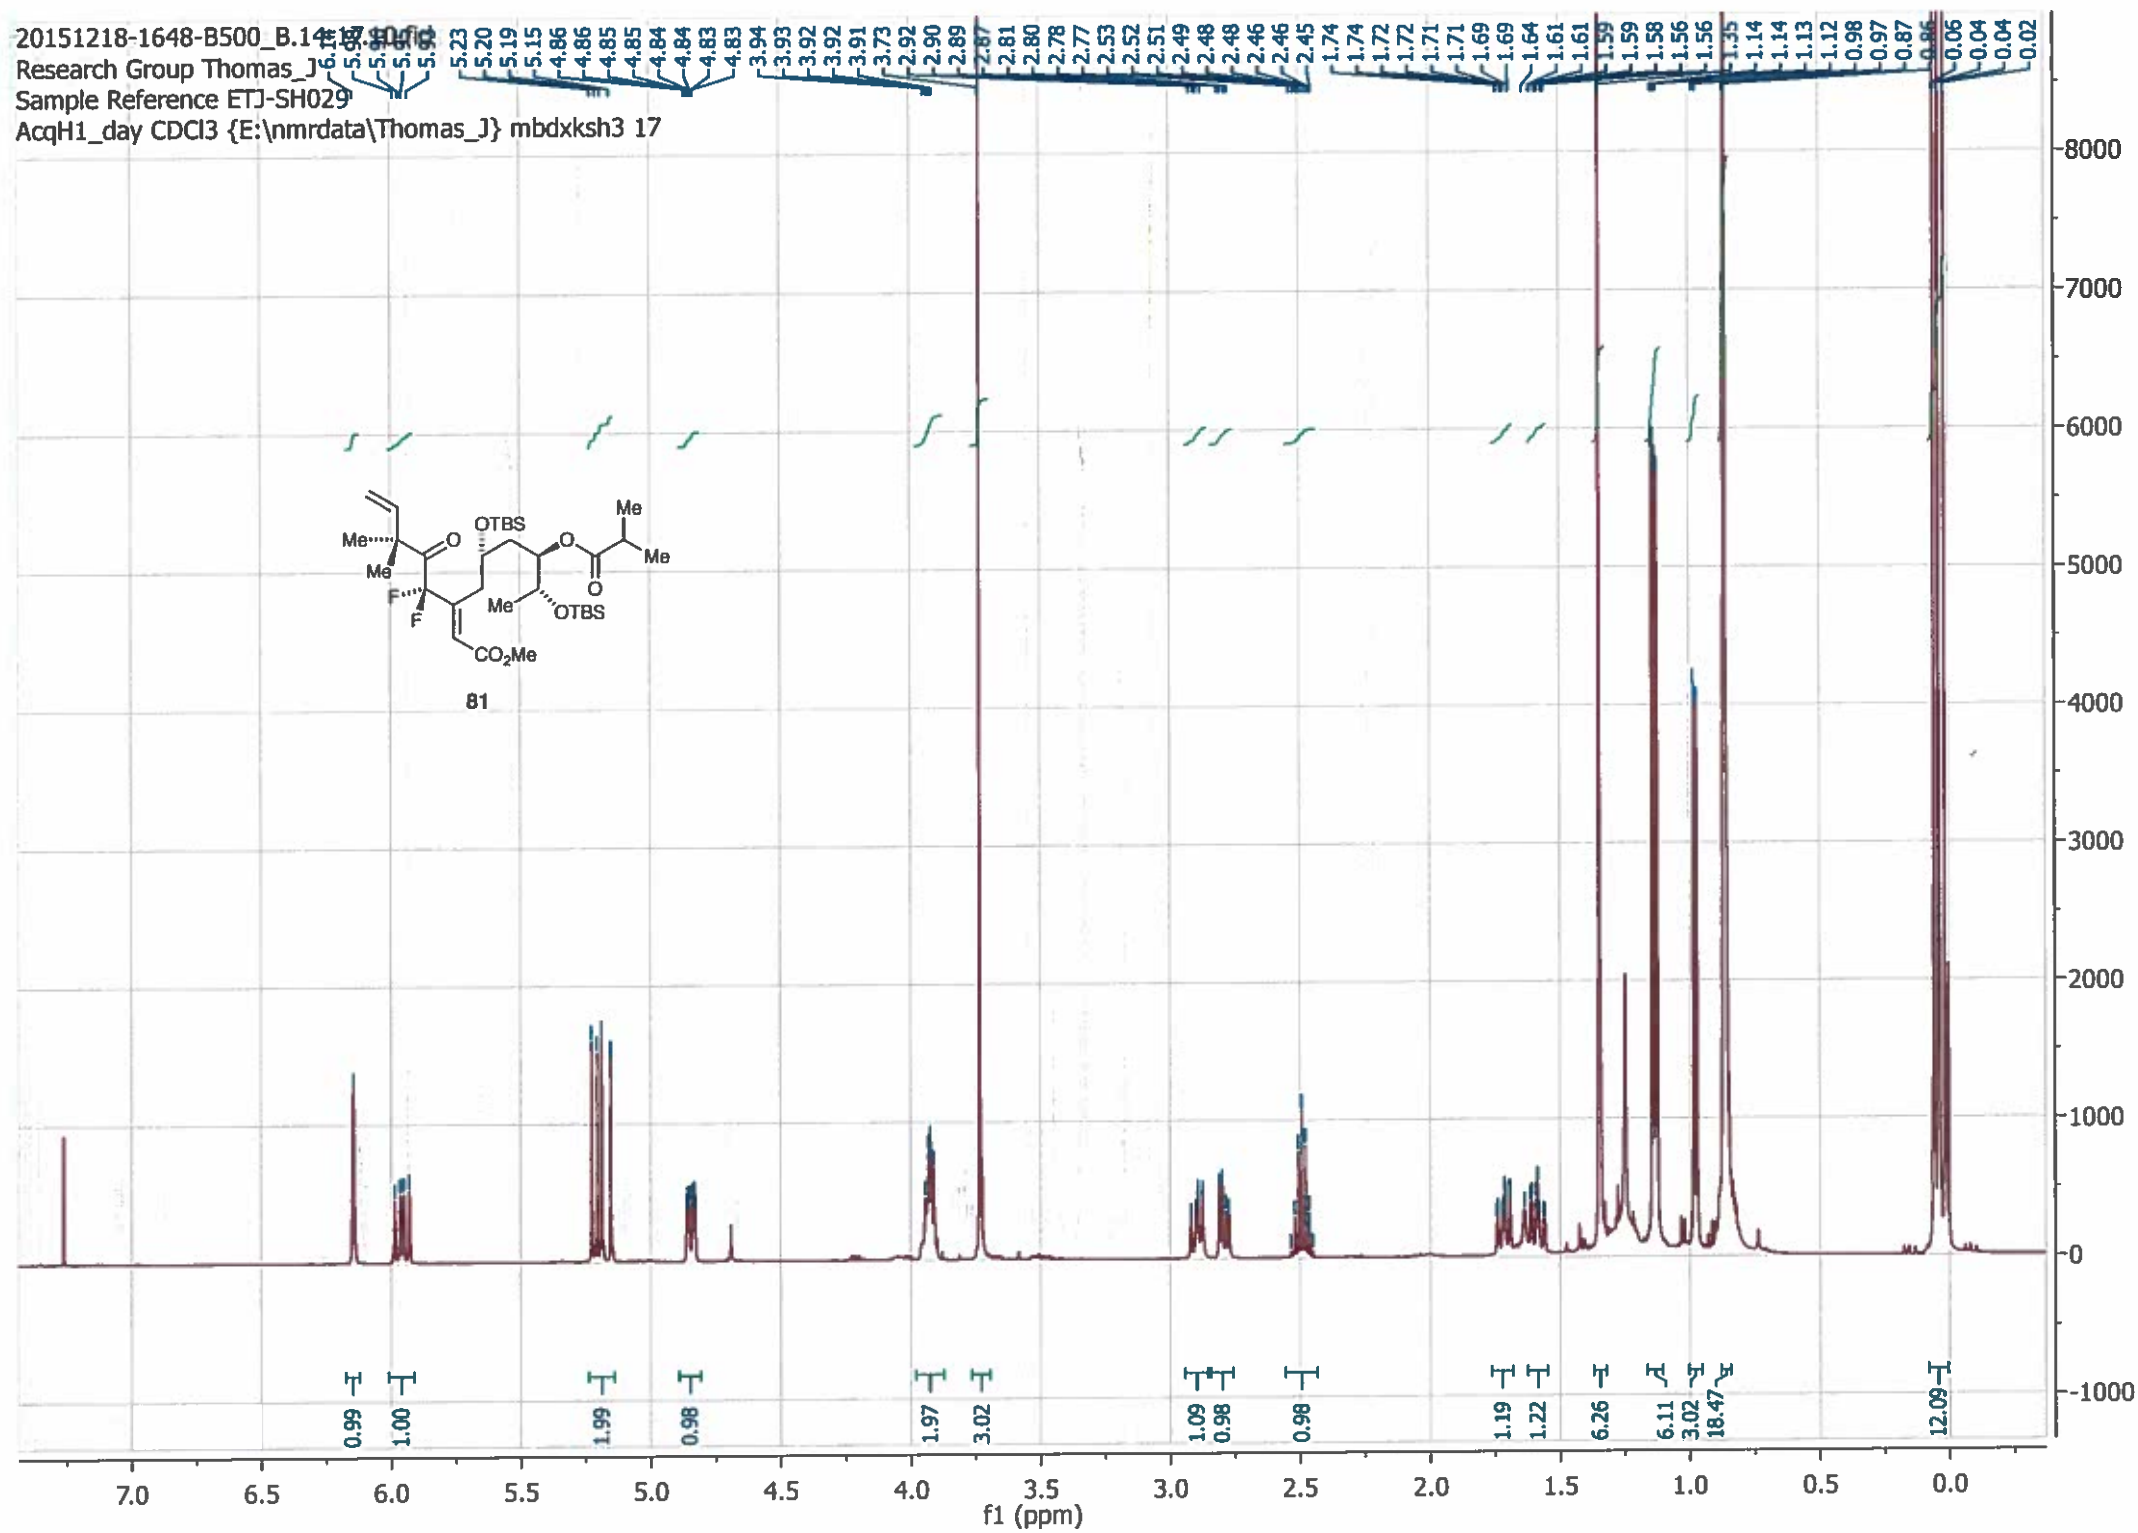



20151218-1648-B500\_B.14-17.13.fid

Research Group Thomas\_J

Sample Reference: TJ-SH028

AcqC13{1H} High CDCl3 {Bd}mrdata\Thomas\_J} mbdxksh317

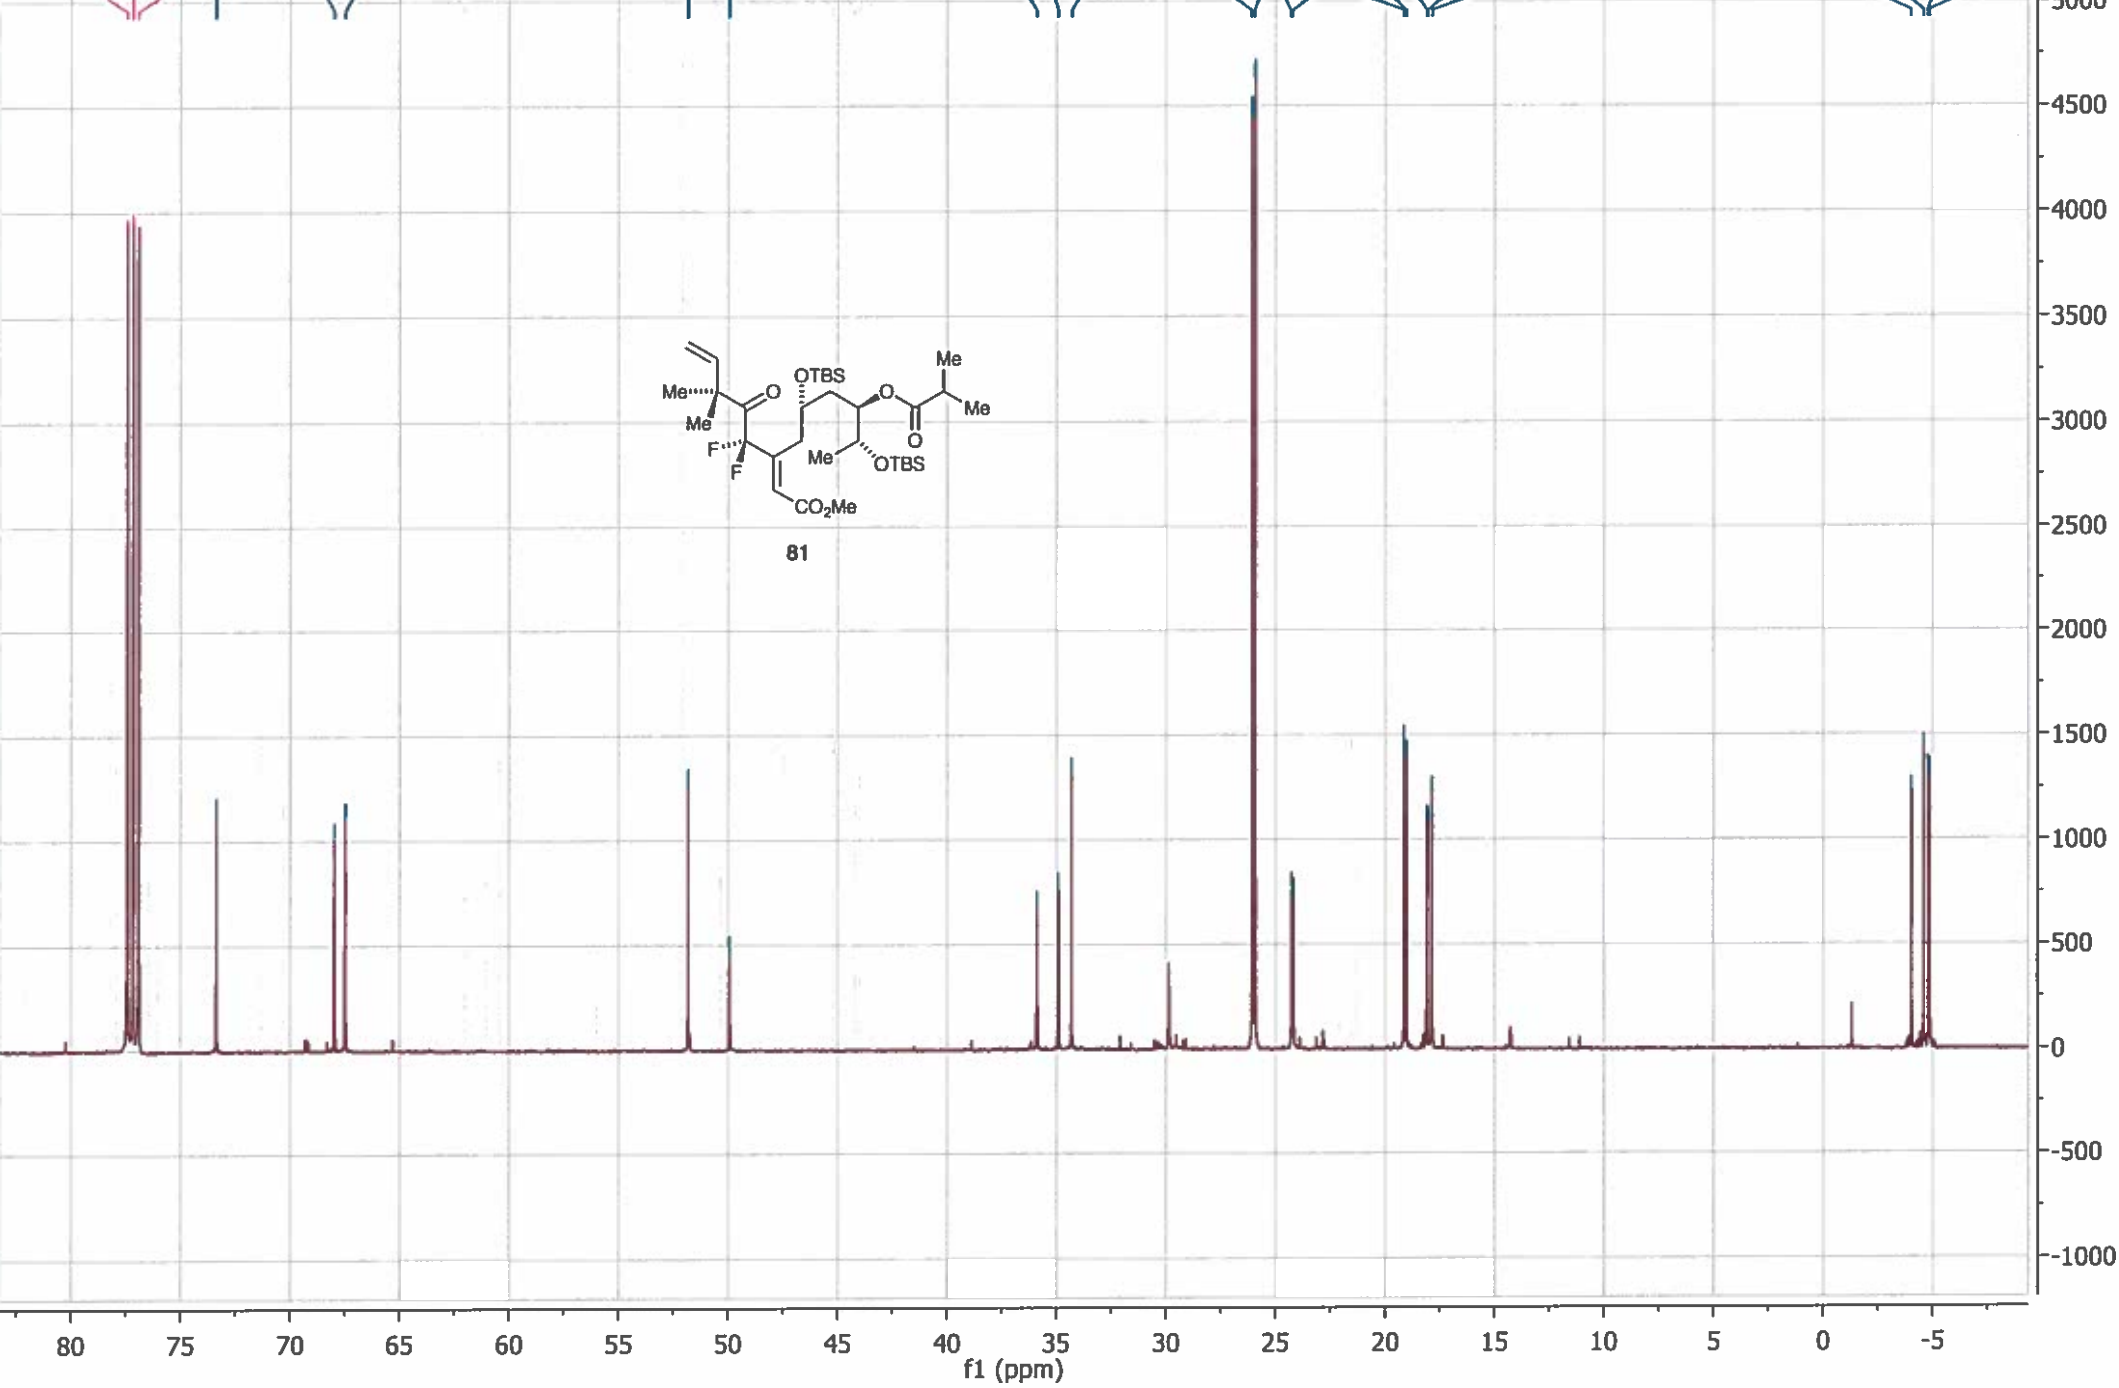

20151218-1648-B500\_B.14-17.13.fid

Res. Grp Thomas\_J

Sample Reference ETJ-SH029

AcqC13{1H}\_night CDCl3 {E:\nmrdata\Thomas\_J} mbdxksh3 17

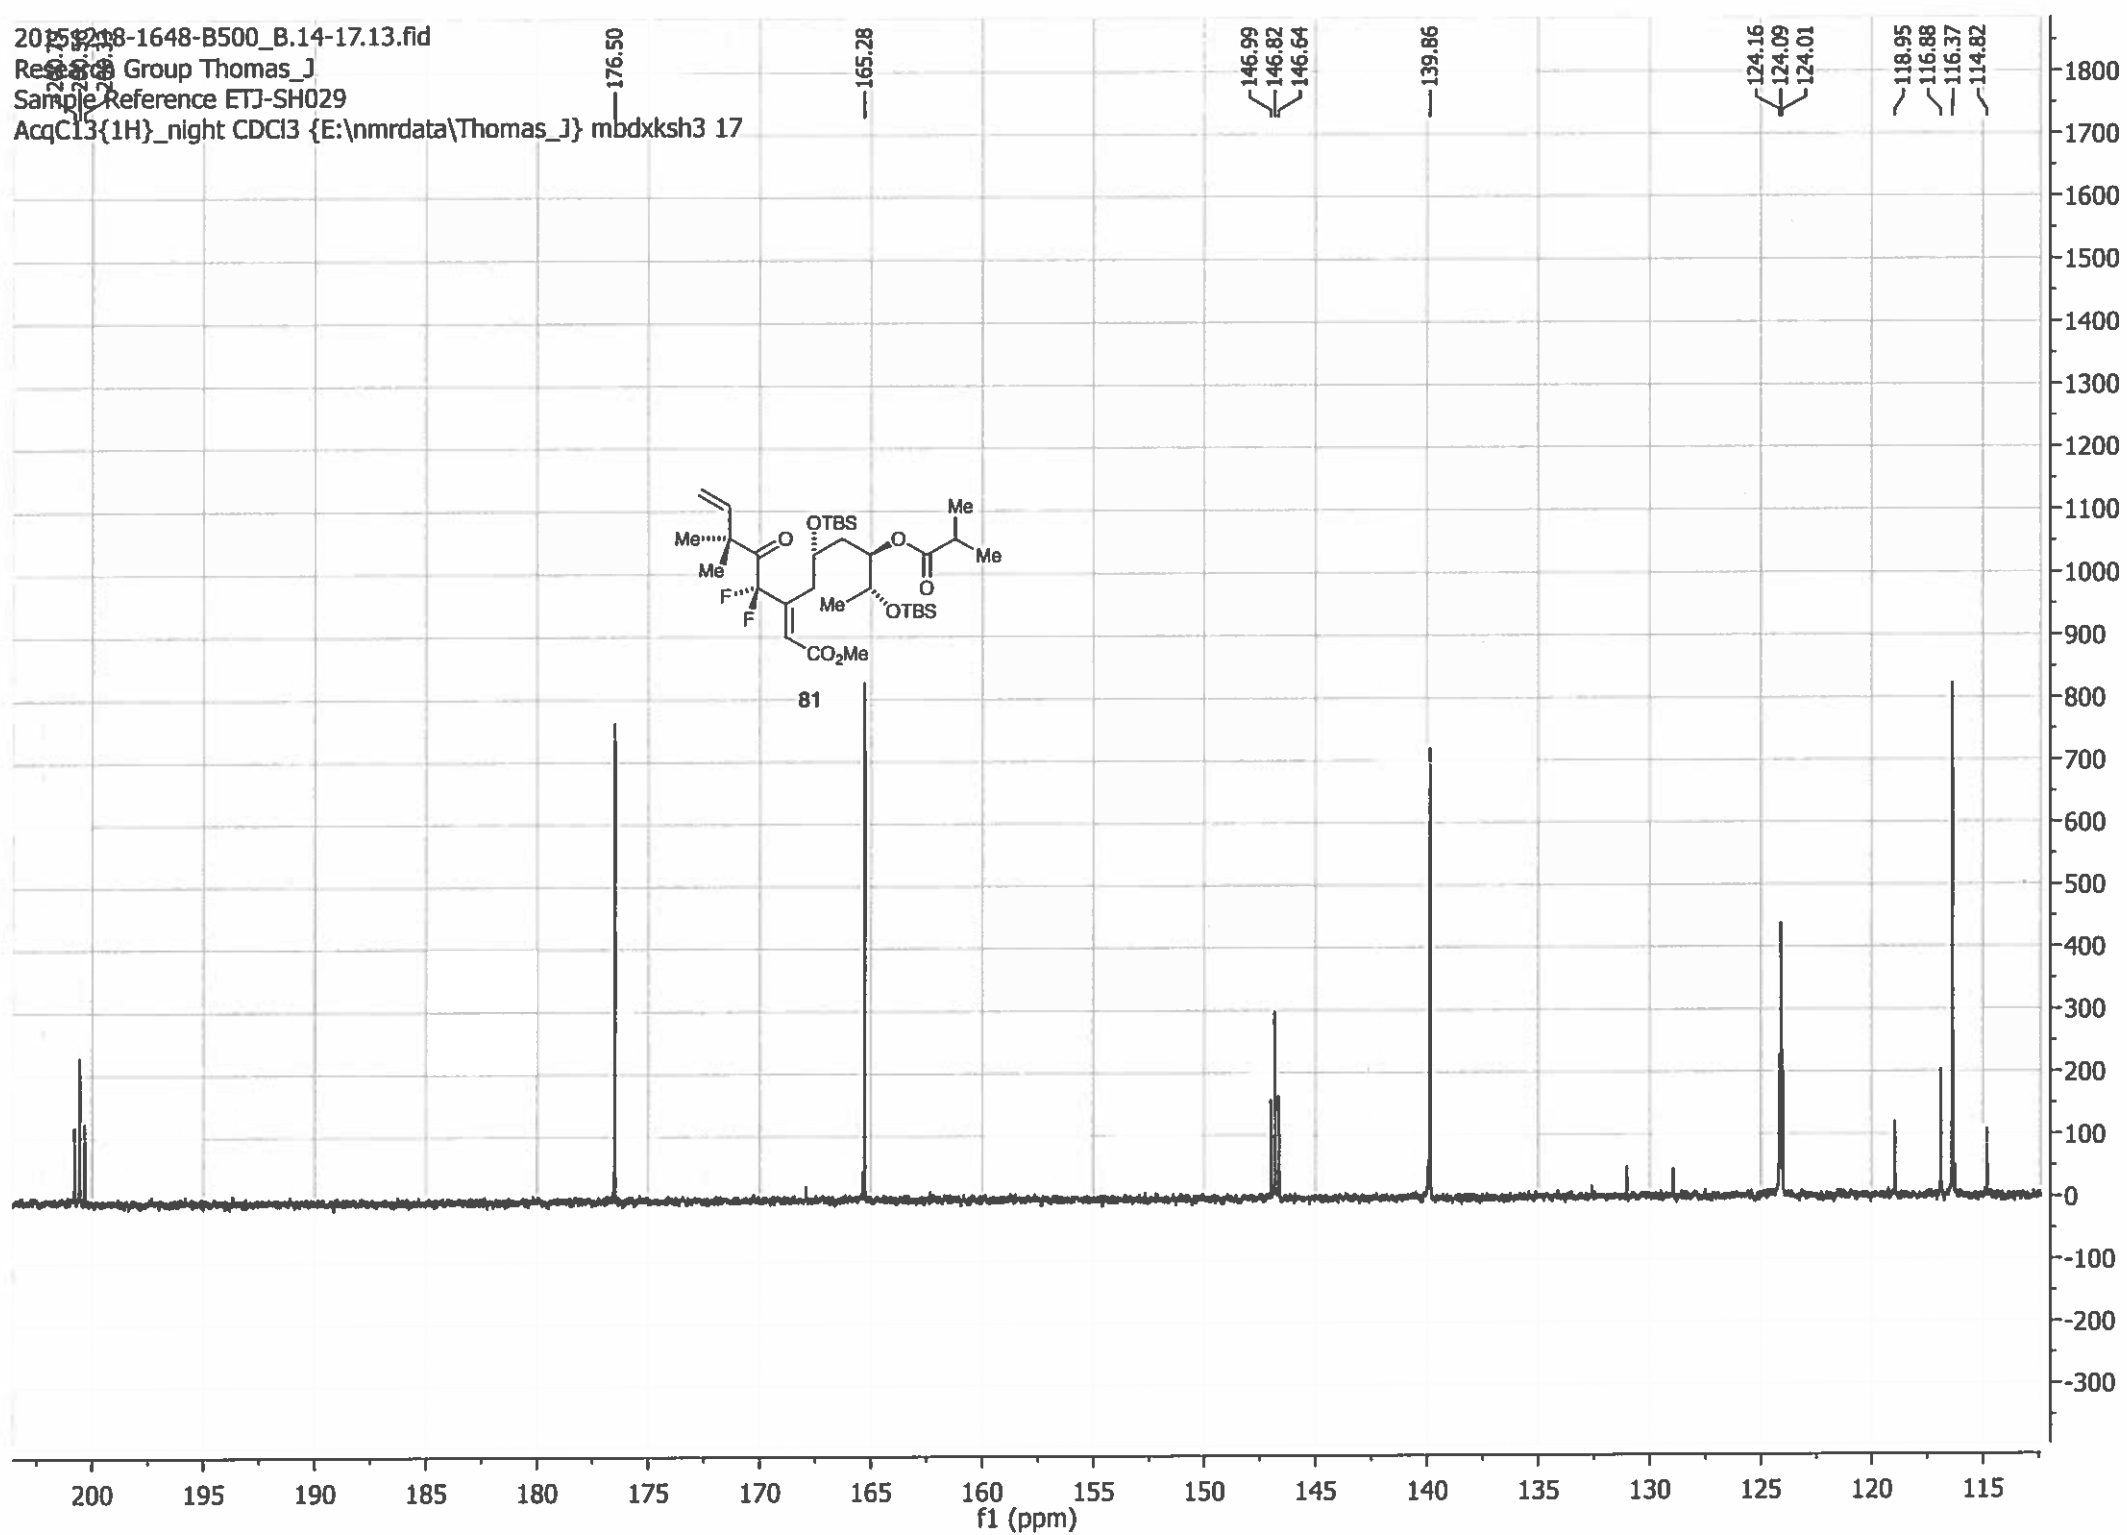

20151221-1708-B400\_B.12-35.11.fid  
Research Group Thomas\_J  
Sample Reference EJT-SH029Fluorine  
mF19CPD CDCl3 {E:\nmrdata\Thomas\_J} mbdxksh3 35

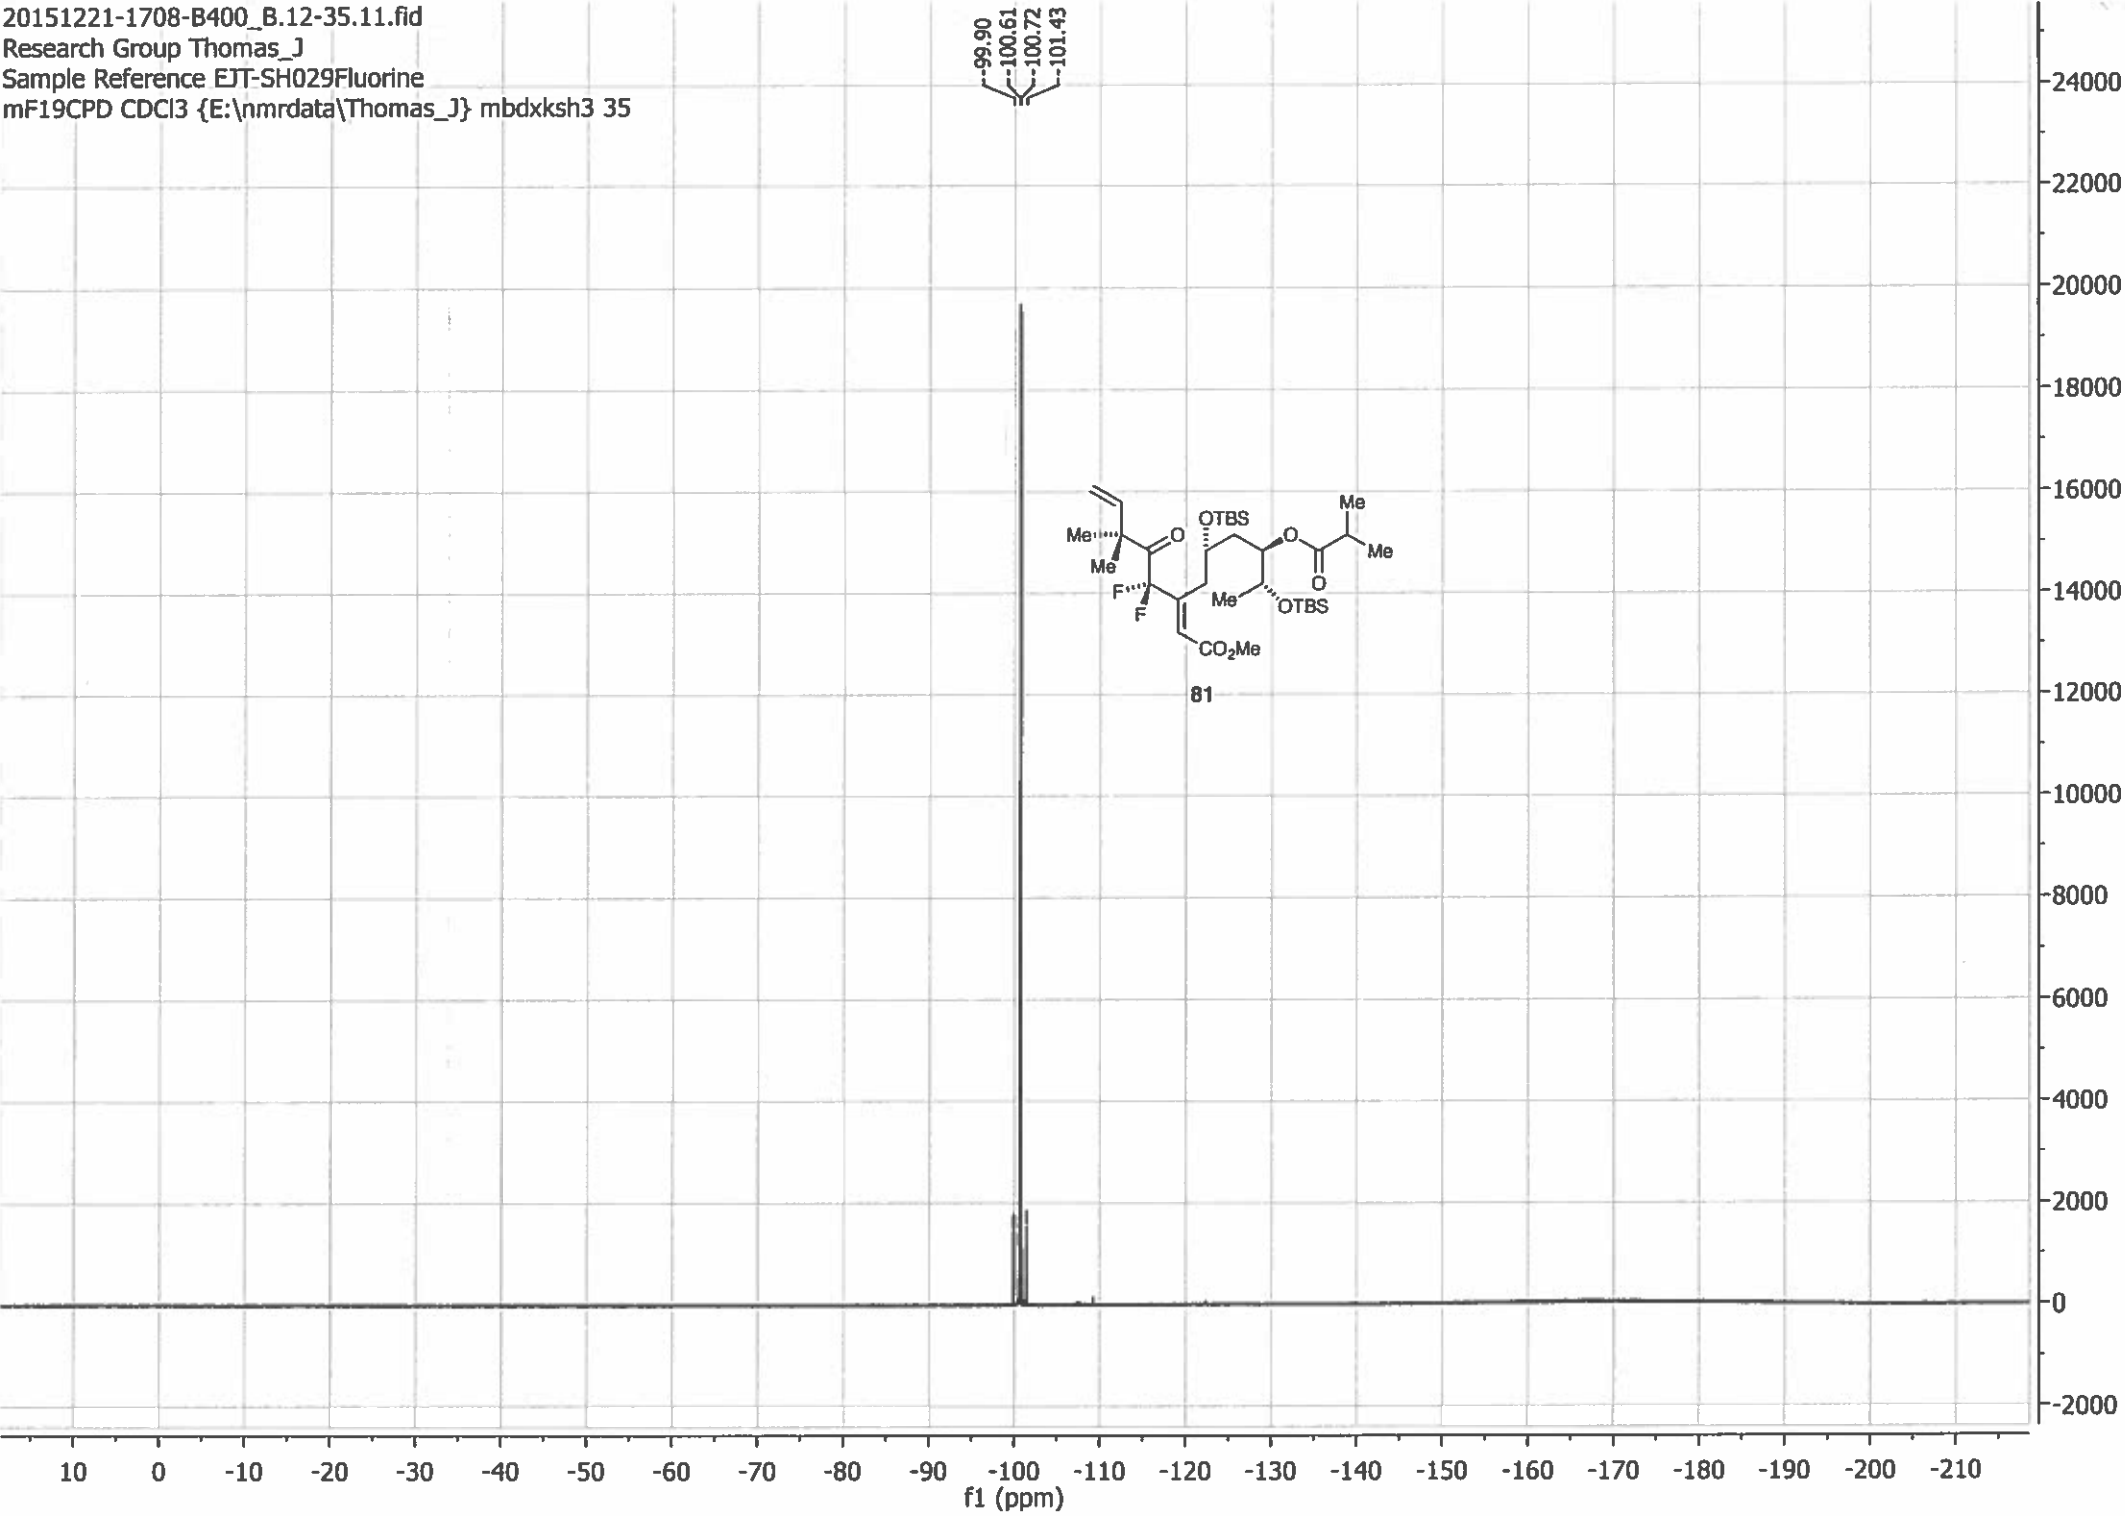

This report was created by ACD/NMR Processor Academic Edition. For more information go to [www.acdlabs.com/nmrproc/](http://www.acdlabs.com/nmrproc/)

|                                                                                                                                                                              |                                                                                                         |                        |                                                                                |                      |           |                       |          |
|------------------------------------------------------------------------------------------------------------------------------------------------------------------------------|---------------------------------------------------------------------------------------------------------|------------------------|--------------------------------------------------------------------------------|----------------------|-----------|-----------------------|----------|
| This report was created by ACD/NMR Processor Academic Edition. For more information go to <a href="http://www.accdatabases.com/nmr/proc/">www.accdatabases.com/nmr/proc/</a> |                                                                                                         |                        |                                                                                |                      |           |                       |          |
| Acquisition Time (sec)                                                                                                                                                       | 3.1719                                                                                                  | Comment                | EJT-PRM172 bis-TBS deprot. 24mg mPROTON C6D6 (E:\bruk500adata\2015\Feb) ejt 48 |                      |           |                       |          |
| Date                                                                                                                                                                         | 09 Feb 2015 14:24:00                                                                                    | Date Stamp             | 09 Feb 2015 14:24:00                                                           |                      |           |                       |          |
| File Name                                                                                                                                                                    | \\ss7a.ds.man.ac.uk\vol5\vol3\users\snmrdata\bruk500adata\2015\Feb\data\ejt\nmr\2015-02-09-ejt-48\10vid |                        |                                                                                | Frequency (MHz)      | 500.13    |                       |          |
| Nucleus                                                                                                                                                                      | 1H                                                                                                      | Number of Transients   | 16                                                                             | Origin               | spect     | Original Points Count | 32768    |
| Owner                                                                                                                                                                        | nmrsu                                                                                                   | Points Count           | 32768                                                                          | Pulse Sequence       | zg30      | Receiver Gain         | 90.50    |
| SW(cyclical) (Hz)                                                                                                                                                            | 10330.58                                                                                                | Solvent                | BENZENE-d6                                                                     | Spectrum Offset (Hz) | 3093.0591 | Spectrum Type         | STANDARD |
| Sweep Width (Hz)                                                                                                                                                             | 10330.26                                                                                                | Temperature (degree C) | 25.000                                                                         |                      |           |                       |          |

2015-02-09-ejt-48.010.esp

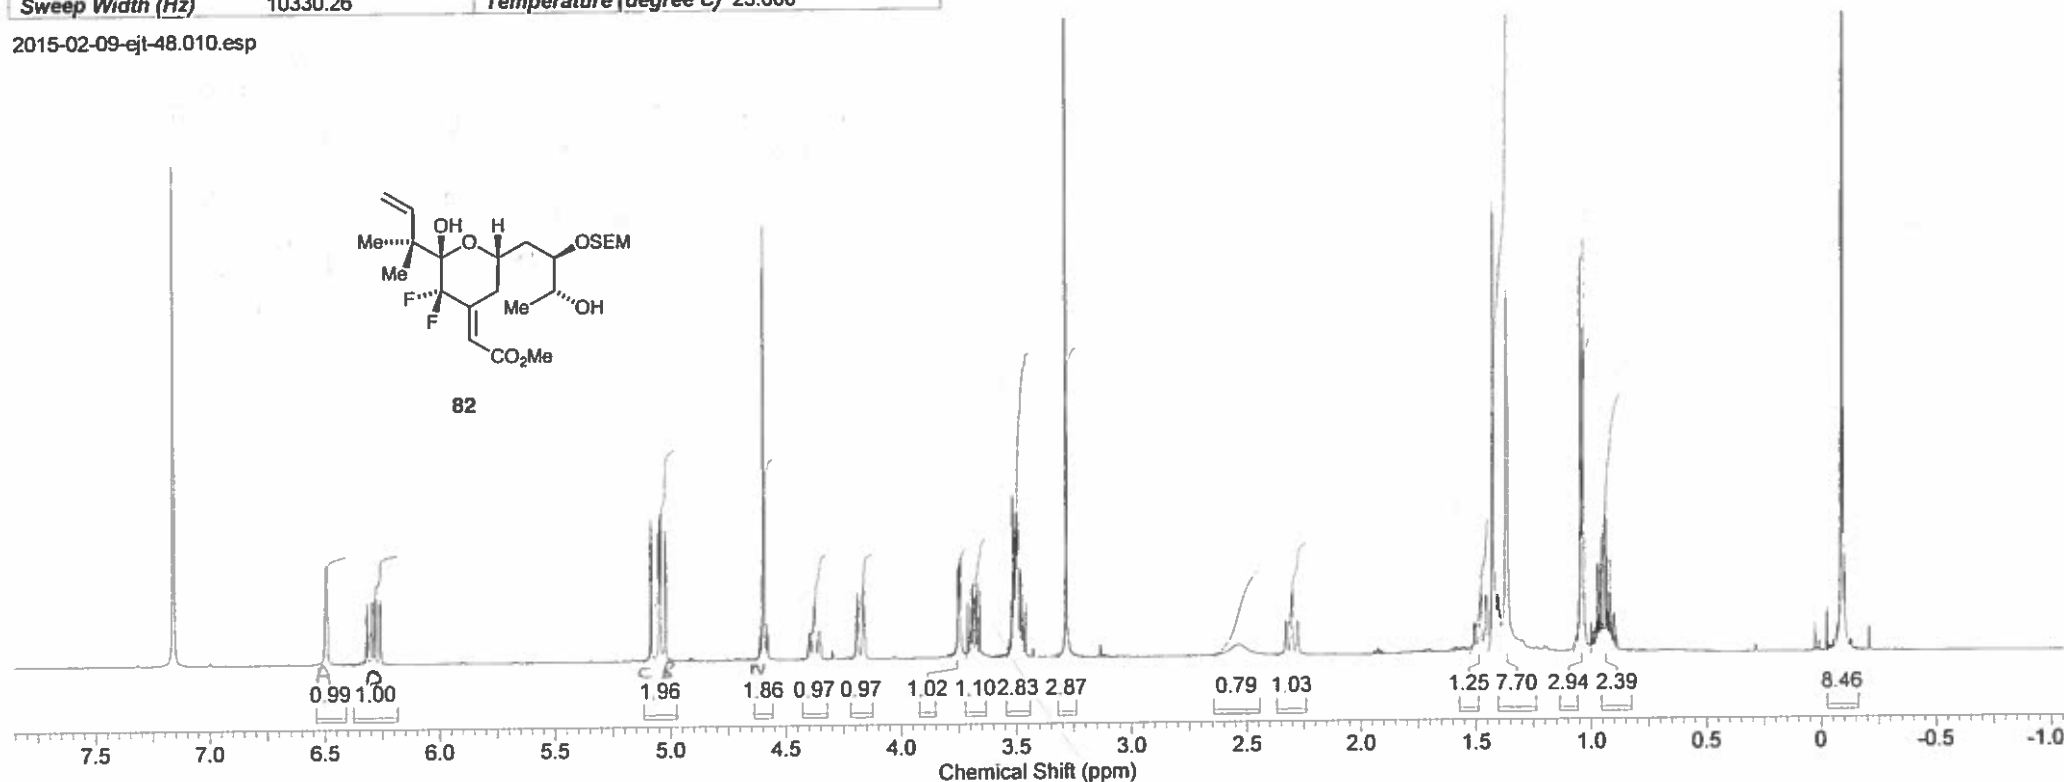

| No. | (ppm)          | Value      | Absolute Value | Non-Negative Value |
|-----|----------------|------------|----------------|--------------------|
| 1   | 1599 .. -0.023 | 4.5782185  | 2.23010775e+10 | 8.45782185         |
| 2   | 5718 .. 1.002  | 3.9459229  | 6.31391744e+9  | 2.39459229         |
| 3   | 5027 .. 1.082  | 9.4357920  | 7.76145357e+9  | 2.94357920         |
| 4   | 2804 .. 1.447  | 7.0429850  | 2.03142328e+10 | 7.70429850         |
| 5   | 4463 .. 1.521  | 1.24665987 | 3.28711808e+9  | 1.24665987         |
| 6   | 2401 .. 2.361  | 1.03409398 | 2.72663706e+9  | 1.03409398         |
| 7   | 4444 .. 2.640  | 0.78715116 | 2.07551309e+9  | 0.78715116         |
| 8   | 2388 .. 3.312  | 0.86838222 | 7.56317850e+9  | 2.86838222         |
| 9   | 4414 .. 3.542  | 0.82843184 | 7.45783962e+9  | 2.82843184         |

| No. | (ppm)         | Value      | Absolute Value | Non-Negative Value |
|-----|---------------|------------|----------------|--------------------|
| 10  | 5335 .. 3.721 | 1.10219407 | 2.90619930e+9  | 1.10219407         |
| 11  | 7208 .. 3.791 | 0.1866615  | 2.68595789e+9  | 1.01866615         |
| 12  | 1260 .. 4.220 | 0.96806675 | 2.55254042e+9  | 0.96806675         |
| 13  | 3233 .. 4.420 | 0.97044659 | 2.55881549e+9  | 0.97044659         |
| 14  | 5590 .. 4.631 | 1.86019683 | 4.90485555e+9  | 1.86019683         |
| 15  | 9744 .. 5.111 | 1.95728326 | 5.16084736e+9  | 1.95728326         |
| 16  | 1829 .. 6.370 | 0.99992341 | 2.63653811e+9  | 0.99992341         |
| 17  | 4099 .. 6.540 | 0.99473357 | 2.62285389e+9  | 0.99473357         |

This report was created by ACD/NMR Processor Academic Edition. For more information go to [www.acdlabs.com/nmrproc/](http://www.acdlabs.com/nmrproc/)

|                        |                                                                                                              |                        |                                                                                    |                      |            |
|------------------------|--------------------------------------------------------------------------------------------------------------|------------------------|------------------------------------------------------------------------------------|----------------------|------------|
| Acquisition Time (sec) | 1.1010                                                                                                       | Comment                | P.Mears EJ1-PRM172 bis-TBS deprot mCARBON C6D6 (E:\bruk500cdata\2015\Feb) staff 26 |                      |            |
| Date                   | 10 Feb 2015 01:44:32                                                                                         | Date Stamp             | 10 Feb 2015 01:44:32                                                               |                      |            |
| File Name              | \\ss7a.ds.man.ac.uk\vol5\vol3\users\snmrdata\bruk500cdata\2015\Feb\data\staff\nmr\2015-02-09-staff-26\21\fid |                        |                                                                                    | Frequency (MHz)      | 125.77     |
| Nucleus                | 13C                                                                                                          | Number of Transients   | 10000                                                                              | Origin               | spect      |
| Owner                  | nmsu                                                                                                         | Points Count           | 32768                                                                              | Pulse Sequence       | zgpg30     |
| SW(cyclical) (Hz)      | 29761.90                                                                                                     | Solvent                | BENZENE-d6                                                                         | Spectrum Offset (Hz) | 12661.5830 |
| Sweep Width (Hz)       | 29761.00                                                                                                     | Temperature (degree C) | 22.161                                                                             | Receiver Gain        | 184.40     |
|                        |                                                                                                              |                        |                                                                                    | Spectrum Type        | STANDARD   |

PRM172-columnedX3-CNMR-C6D6.esp

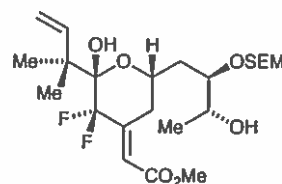

82

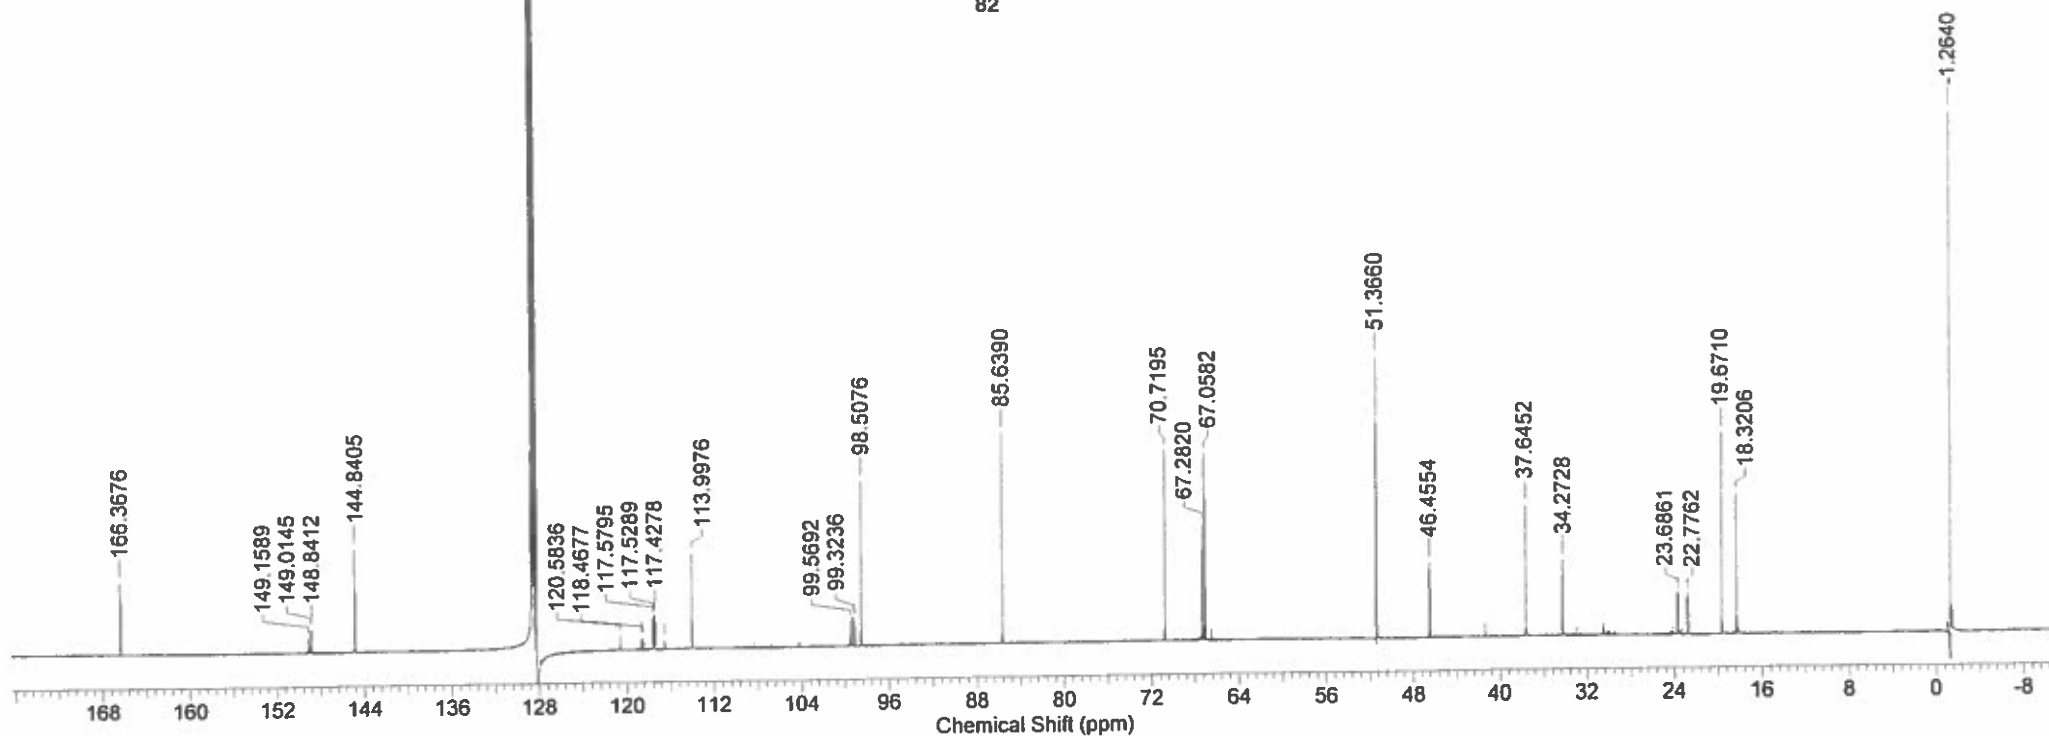

This report was created by ACD/NMR Processor Academic Edition. For more information go to [www.acdlabs.com/nmrproc/](http://www.acdlabs.com/nmrproc/)

|                                                                                                                                                                  |                                                                                                      |                        |            |                                                                             |                      |                       |          |
|------------------------------------------------------------------------------------------------------------------------------------------------------------------|------------------------------------------------------------------------------------------------------|------------------------|------------|-----------------------------------------------------------------------------|----------------------|-----------------------|----------|
| This report was created by ACD/NMR Processor Academic Edition. For more information go to <a href="http://www.acdsol.com/nmr/proc/">www.acdsol.com/nmr/proc/</a> |                                                                                                      |                        |            |                                                                             |                      |                       |          |
| Acquisition Time (sec)                                                                                                                                           | 0.5767                                                                                               | Comment                |            | EJT-PRM172 bis-TBS deprot. 24mg m19F C6D6 (E:\bruk500adata\2015\Feb) ejt 48 |                      |                       |          |
| Date                                                                                                                                                             | 09 Feb 2015 14:34:40                                                                                 |                        |            | Date Stamp                                                                  | 09 Feb 2015 14:34:40 |                       |          |
| File Name                                                                                                                                                        | \\ss7a.ds.man.ac.uk\vol5\vol3\users\snmrdata\bruk500adata\2015\Feb\data\ejt\172\172-09-ejt-48\12\fid |                        |            |                                                                             | Frequency (MHz)      | 470.59                |          |
| Nucleus                                                                                                                                                          | 19F                                                                                                  | Number of Transients   | 16         | Origin                                                                      | spect                | Original Points Count | 65536    |
| Owner                                                                                                                                                            | nmrsu                                                                                                | Points Count           | 65536      | Pulse Sequence                                                              | zgfgqn               | Receiver Gain         | 406.00   |
| SW(cyclical) (Hz)                                                                                                                                                | 113636.37                                                                                            | Solvent                | BENZENE-d6 | Spectrum Offset (Hz)                                                        | -47059.0234          | Spectrum Type         | STANDARD |
| Sweep Width (Hz)                                                                                                                                                 | 113634.63                                                                                            | Temperature (degree C) | 25.000     |                                                                             |                      |                       |          |

PRM172-columnedX3-FNMR-C6D6.esp

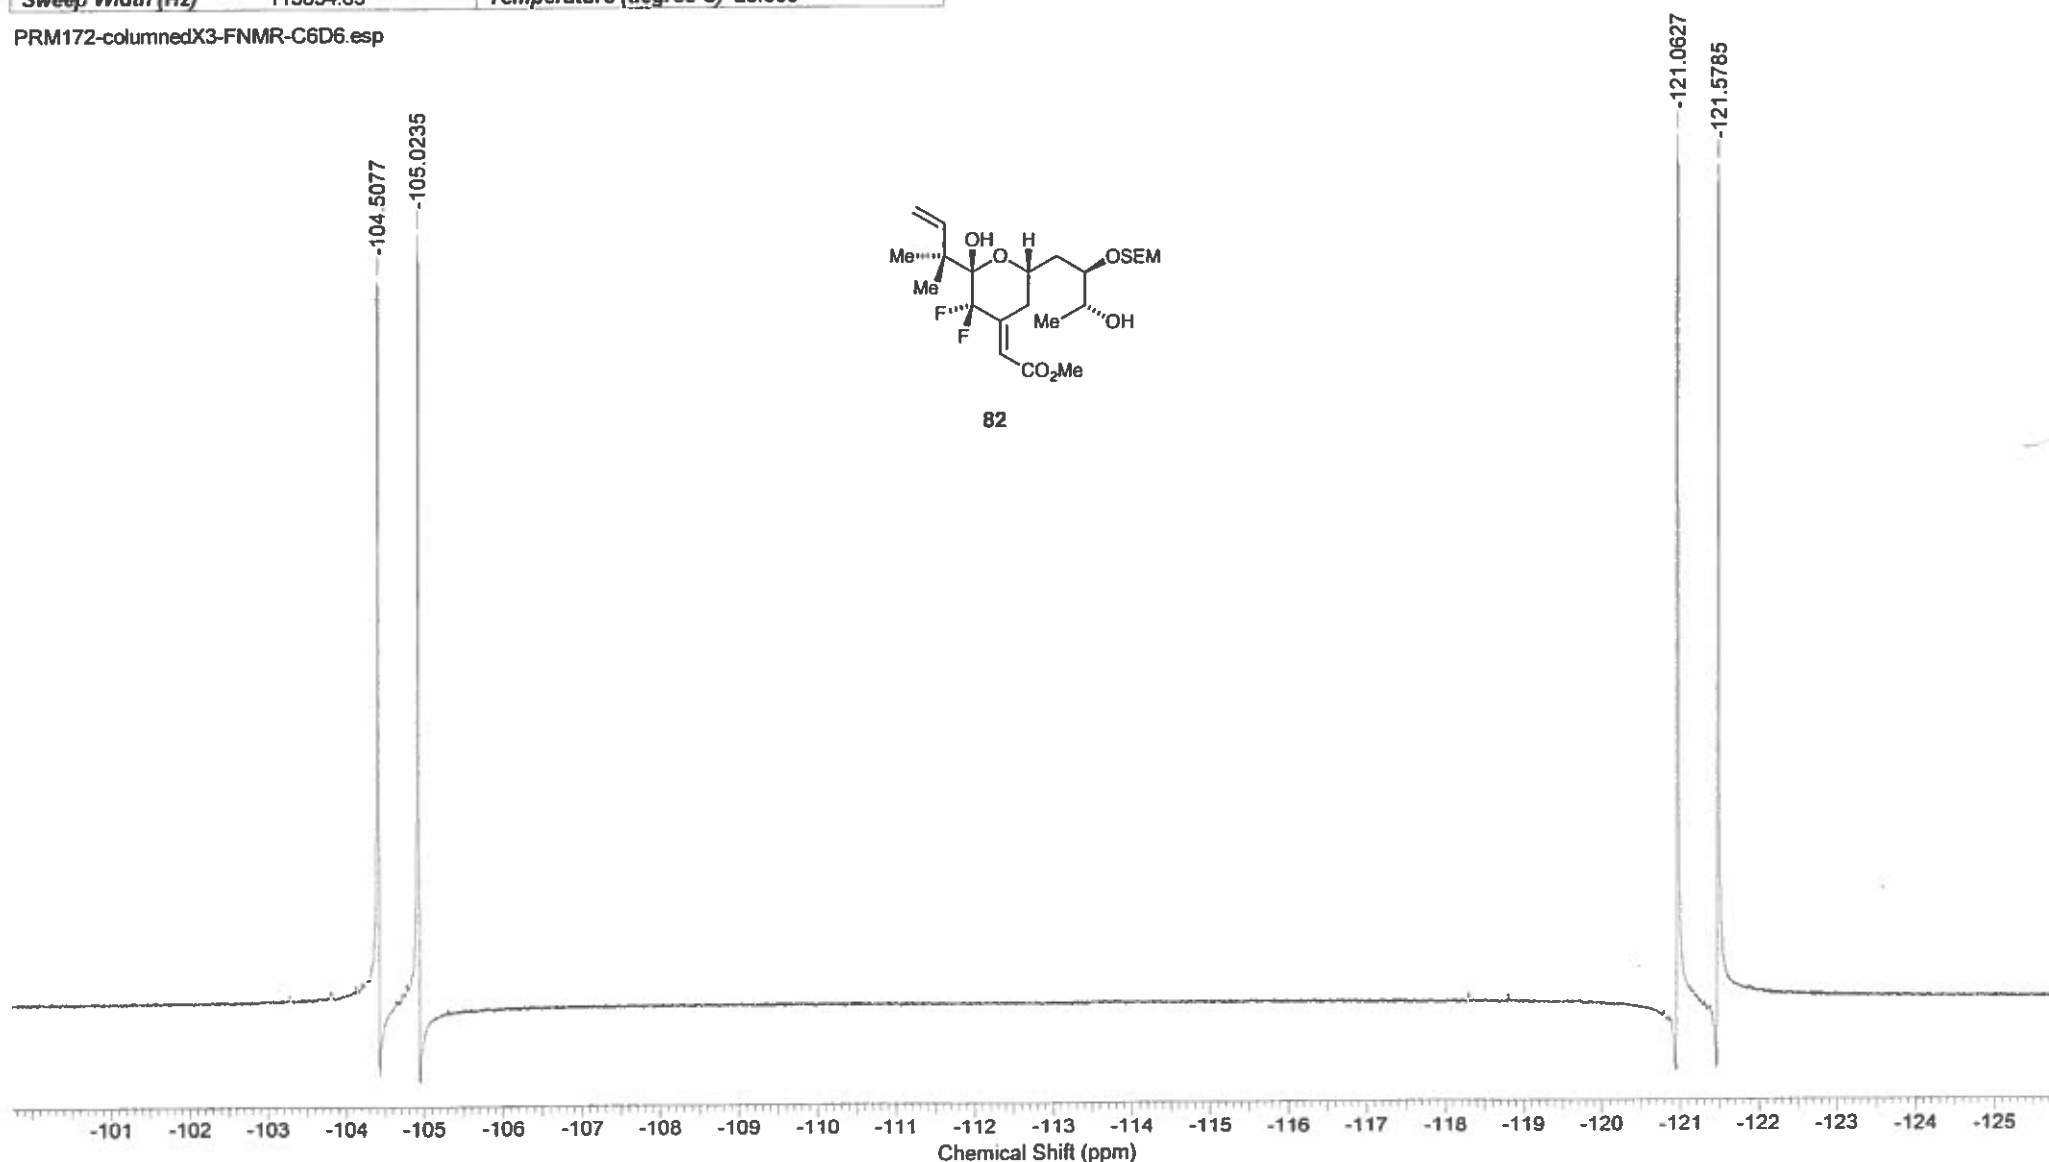

This report was created by ACD/NMR Processor Academic Edition. For more information go to [www.acdlabs.com/nmrproc/](http://www.acdlabs.com/nmrproc/)

|                                                                                                                                                                    |                                                                                                         |                        |                                                                      |                      |           |                       |          |
|--------------------------------------------------------------------------------------------------------------------------------------------------------------------|---------------------------------------------------------------------------------------------------------|------------------------|----------------------------------------------------------------------|----------------------|-----------|-----------------------|----------|
| This report was created by ACD/NMR Processor Academic Edition. For more information go to <a href="http://www.acdlabs.com/nmr/proc/">www.acdlabs.com/nmr/proc/</a> |                                                                                                         |                        |                                                                      |                      |           |                       |          |
| Acquisition Time (sec)                                                                                                                                             | 3.9649                                                                                                  | Comment                | EJT-PRM175 f6-28 11mg mPROTON C6D6 (e:\bruk400adata\2015\Feb) ejt 45 |                      |           |                       |          |
| Date                                                                                                                                                               | 25 Feb 2015 18:31:28                                                                                    | Date Stamp             | 25 Feb 2015 18:31:28                                                 |                      |           |                       |          |
| File Name                                                                                                                                                          | \\ss7a.ds.man.ac.uk\vol5\vol3\users\snmrdata\bruk400adata\2015\Feb\data\ejt\nmr\2015-02-25-ejt-45\10fid |                        |                                                                      | Frequency (MHz)      | 400.13    |                       |          |
| Nucleus                                                                                                                                                            | 1H                                                                                                      | Number of Transients   | 16                                                                   | Origin               | AV400     | Original Points Count | 32768    |
| Owner                                                                                                                                                              | nmrsu                                                                                                   | Points Count           | 32768                                                                | Pulse Sequence       | zg30b     | Receiver Gain         | 128.00   |
| SW(cyclical) (Hz)                                                                                                                                                  | 8264.46                                                                                                 | Solvent                | BENZENE-d6                                                           | Spectrum Offset (Hz) | 2473.8770 | Spectrum Type         | STANDARD |
| Sweep Width (Hz)                                                                                                                                                   | 8264.21                                                                                                 | Temperature (degree C) | 19.800                                                               |                      |           |                       |          |

2015-02-25-ejt-45.010.esp

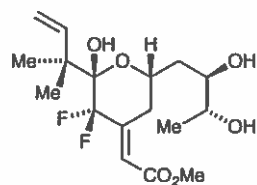

83

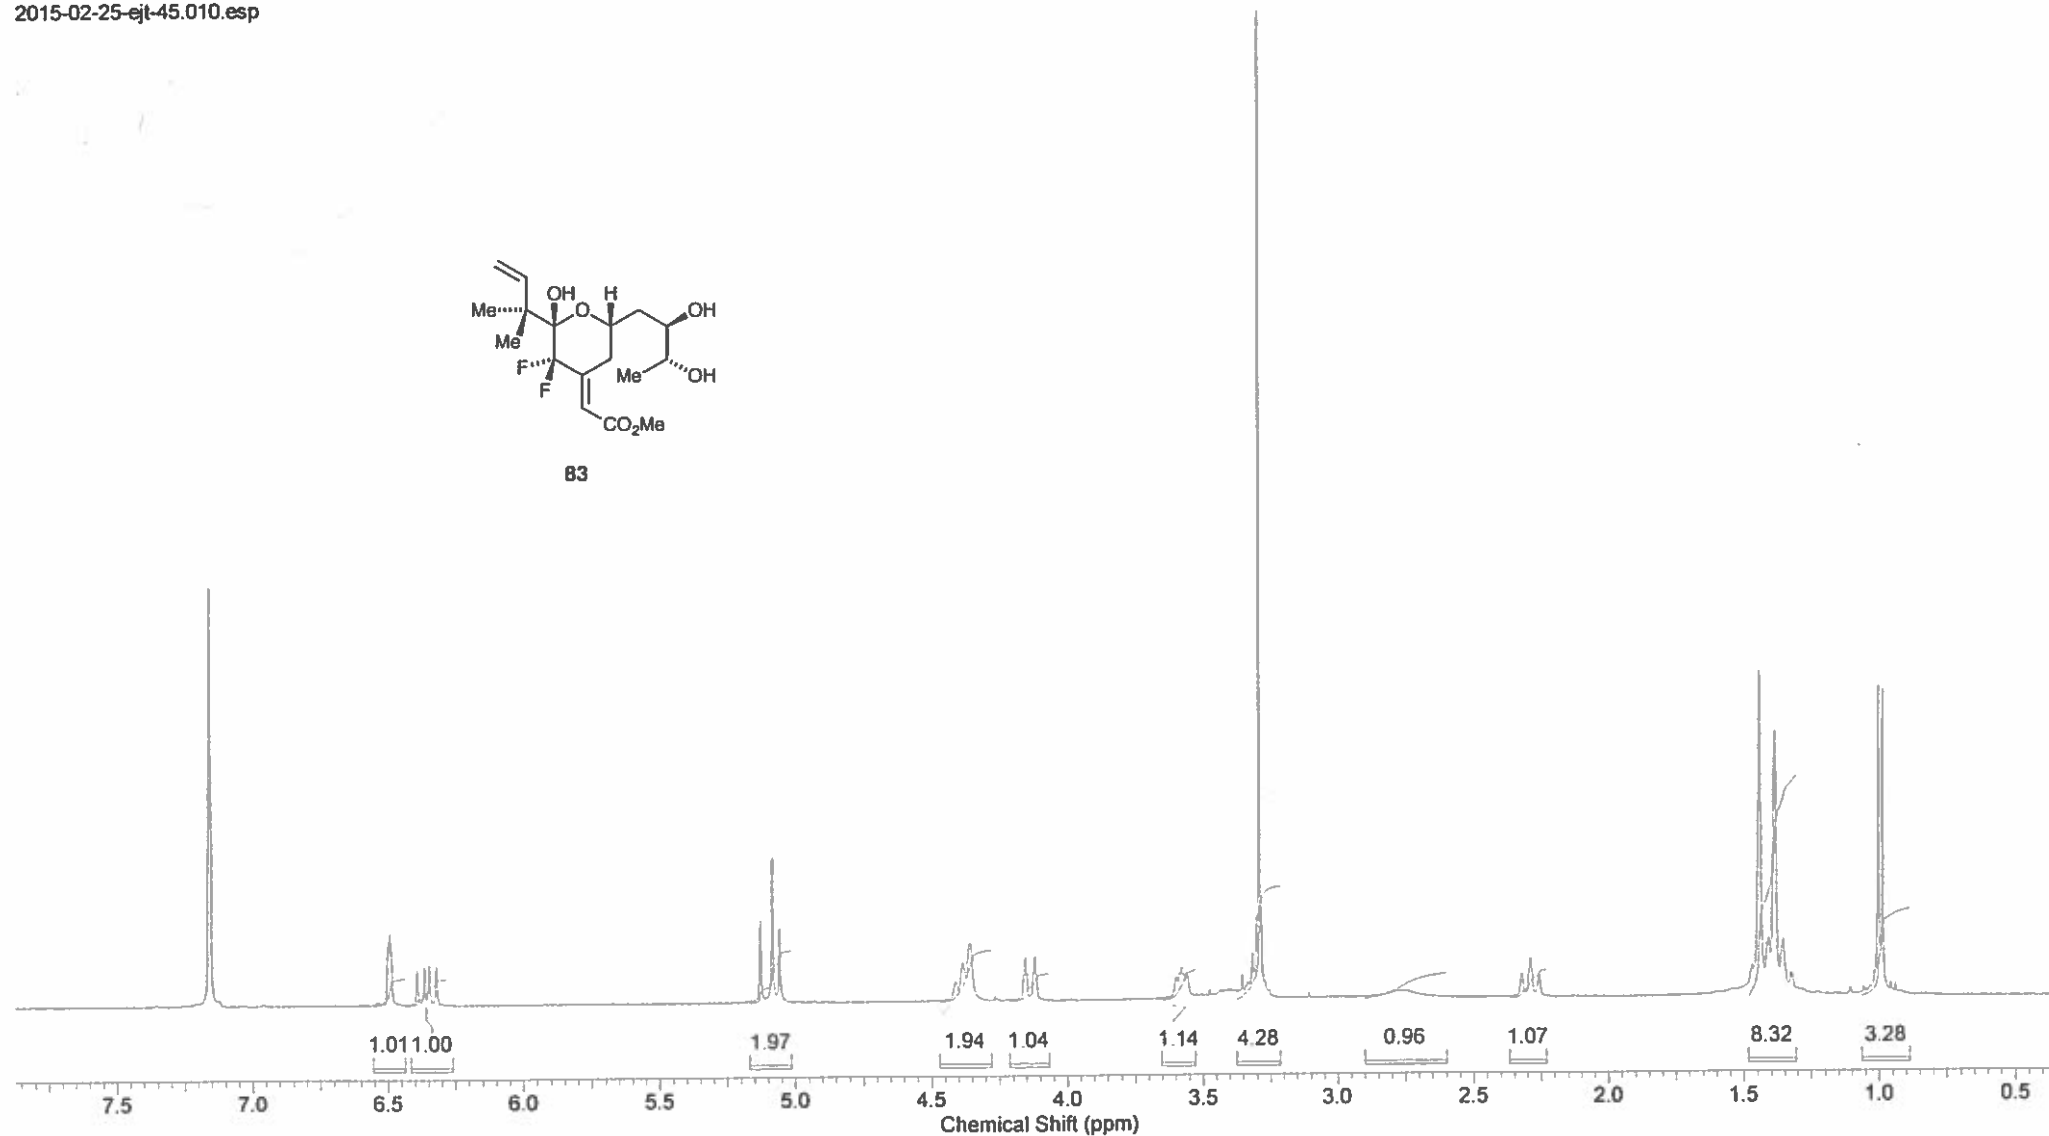

This report was created by ACD/NMR Processor Academic Edition. For more information go to [www.acdlabs.com/nmrproc/](http://www.acdlabs.com/nmrproc/)

|                        |                                                                                                                                        |                        |                      |                      |                 |                       |          |
|------------------------|----------------------------------------------------------------------------------------------------------------------------------------|------------------------|----------------------|----------------------|-----------------|-----------------------|----------|
| Acquisition Time (sec) | 1.1010                                                                                                                                 |                        |                      |                      |                 |                       |          |
| Comment                | Research Group EJT Acad/Staff/PDRA/PG/UG PDRA 0215 129 EJT-PRM175 F6-28 11mg Mears P. mCARBON C6D6 (E:\bruk500cdata\2015\Feb) staff 53 |                        |                      |                      |                 |                       |          |
| Date                   | 28 Feb 2015 19:50:24                                                                                                                   | Date Stamp             | 28 Feb 2015 19:50:24 |                      |                 |                       |          |
| File Name              | \\ss7a.ds.man.ac.uk\vol5\vol3\users\snmrdata\bruk500cdata\2015\Feb\data\staff\nmr\2015-02-27-staff-53\11\fid                           |                        |                      |                      | Frequency (MHz) | 125.77                |          |
| Nucleus                | 13C                                                                                                                                    | Number of Transients   | 8192                 | Origin               | spect           | Original Points Count | 32768    |
| Owner                  | nmrsu                                                                                                                                  | Points Count           | 32768                | Pulse Sequence       | zgpg30          | Receiver Gain         | 184.40   |
| SW(cyclical) (Hz)      | 29761.90                                                                                                                               | Solvent                | BENZENE-d6           | Spectrum Offset (Hz) | 12660.7109      | Spectrum Type         | STANDARD |
| Sweep Width (Hz)       | 29761.00                                                                                                                               | Temperature (degree C) | 22.153               |                      |                 |                       |          |

PRM175-CNMR.esp

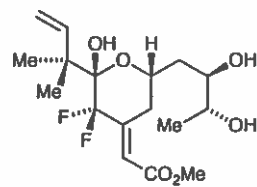

83

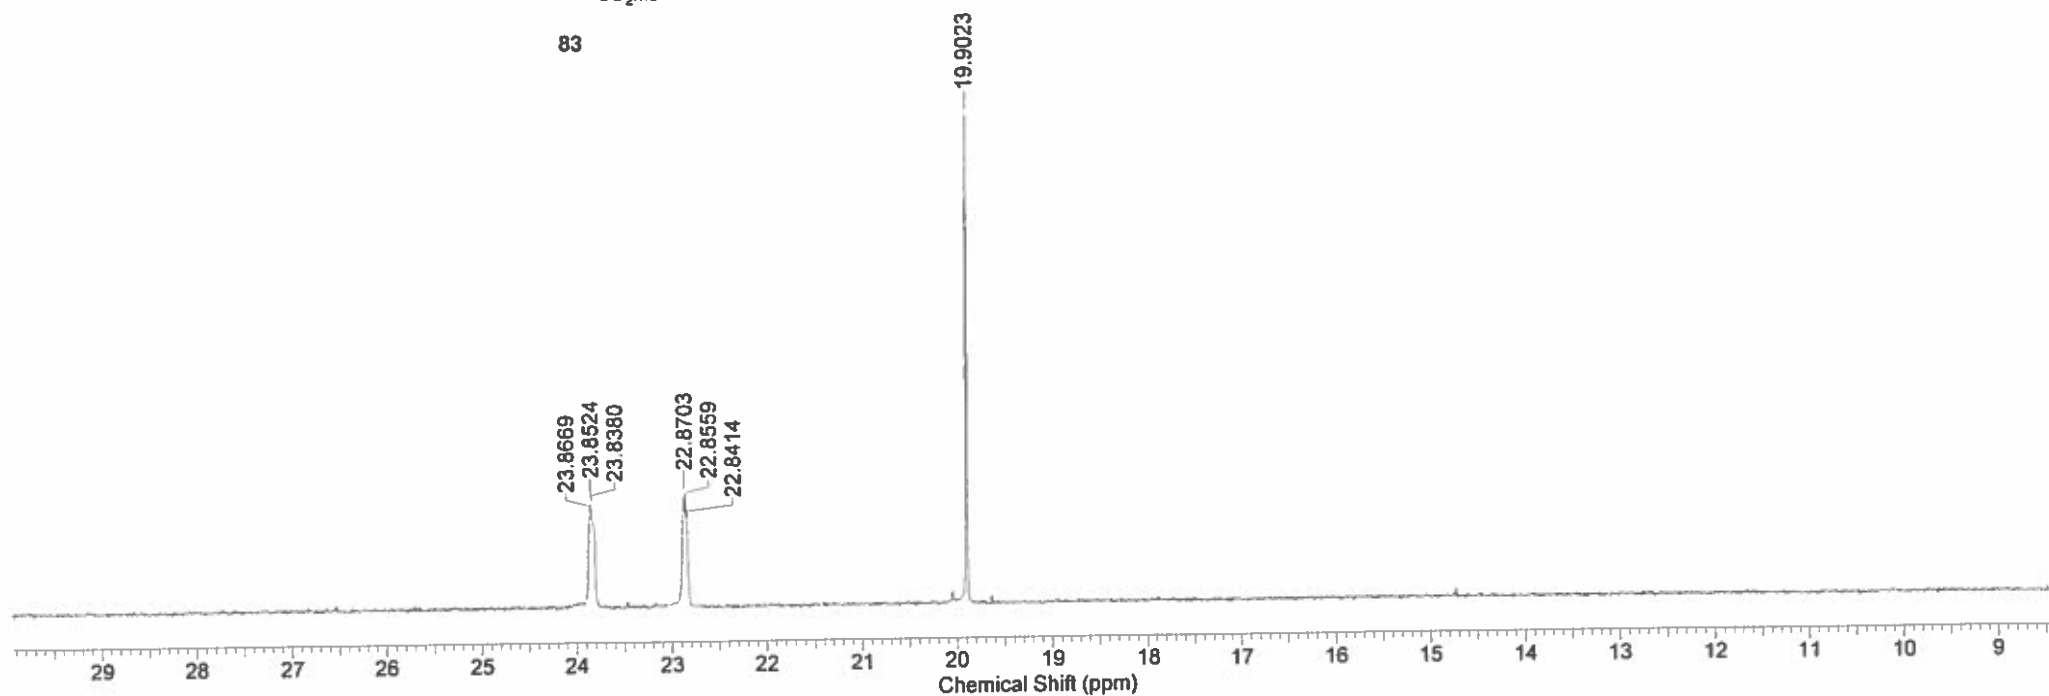



This report was created by ACD/NMR Processor Academic Edition. For more information go to [www.acdlabs.com/nmrproc/](http://www.acdlabs.com/nmrproc/)

|                        |                                                                                                                                        |                        |                      |                      |            |
|------------------------|----------------------------------------------------------------------------------------------------------------------------------------|------------------------|----------------------|----------------------|------------|
| Acquisition Time (sec) | 1.1010                                                                                                                                 |                        |                      |                      |            |
| Comment                | Research Group EJT Acad/Staff/PDRA/PG/UG PDRA 0215 129 EJT-PRM175 F6-28 11mg Mears P. mCARBON C6D6 (E:\bruk500cdata\2015\Feb) staff 53 |                        |                      |                      |            |
| Date                   | 28 Feb 2015 19:50:24                                                                                                                   | Date Stamp             | 28 Feb 2015 19:50:24 |                      |            |
| File Name              | \\ss7a.ds.man.ac.uk\vol5\vol3\users\snmrdata\bruk500cdata\2015\Feb\data\staff\nmr\2015-02-27-staff-53\11\fid                           |                        |                      | Frequency (MHz)      | 125.77     |
| Nucleus                | 13C                                                                                                                                    | Number of Transients   | 8192                 | Origin               | spect      |
| Owner                  | nmrsu                                                                                                                                  | Points Count           | 32768                | Pulse Sequence       | zgpg30     |
| SW(cyclical) (Hz)      | 29761.90                                                                                                                               | Solvent                | BENZENE-d6           | Spectrum Offset (Hz) | 12660.7109 |
| Sweep Width (Hz)       | 29761.00                                                                                                                               | Temperature (degree C) | 22.153               | Receiver Gain        | 184.40     |
|                        |                                                                                                                                        |                        |                      | Spectrum Type        | STANDARD   |

PRM175-CNMR.esp

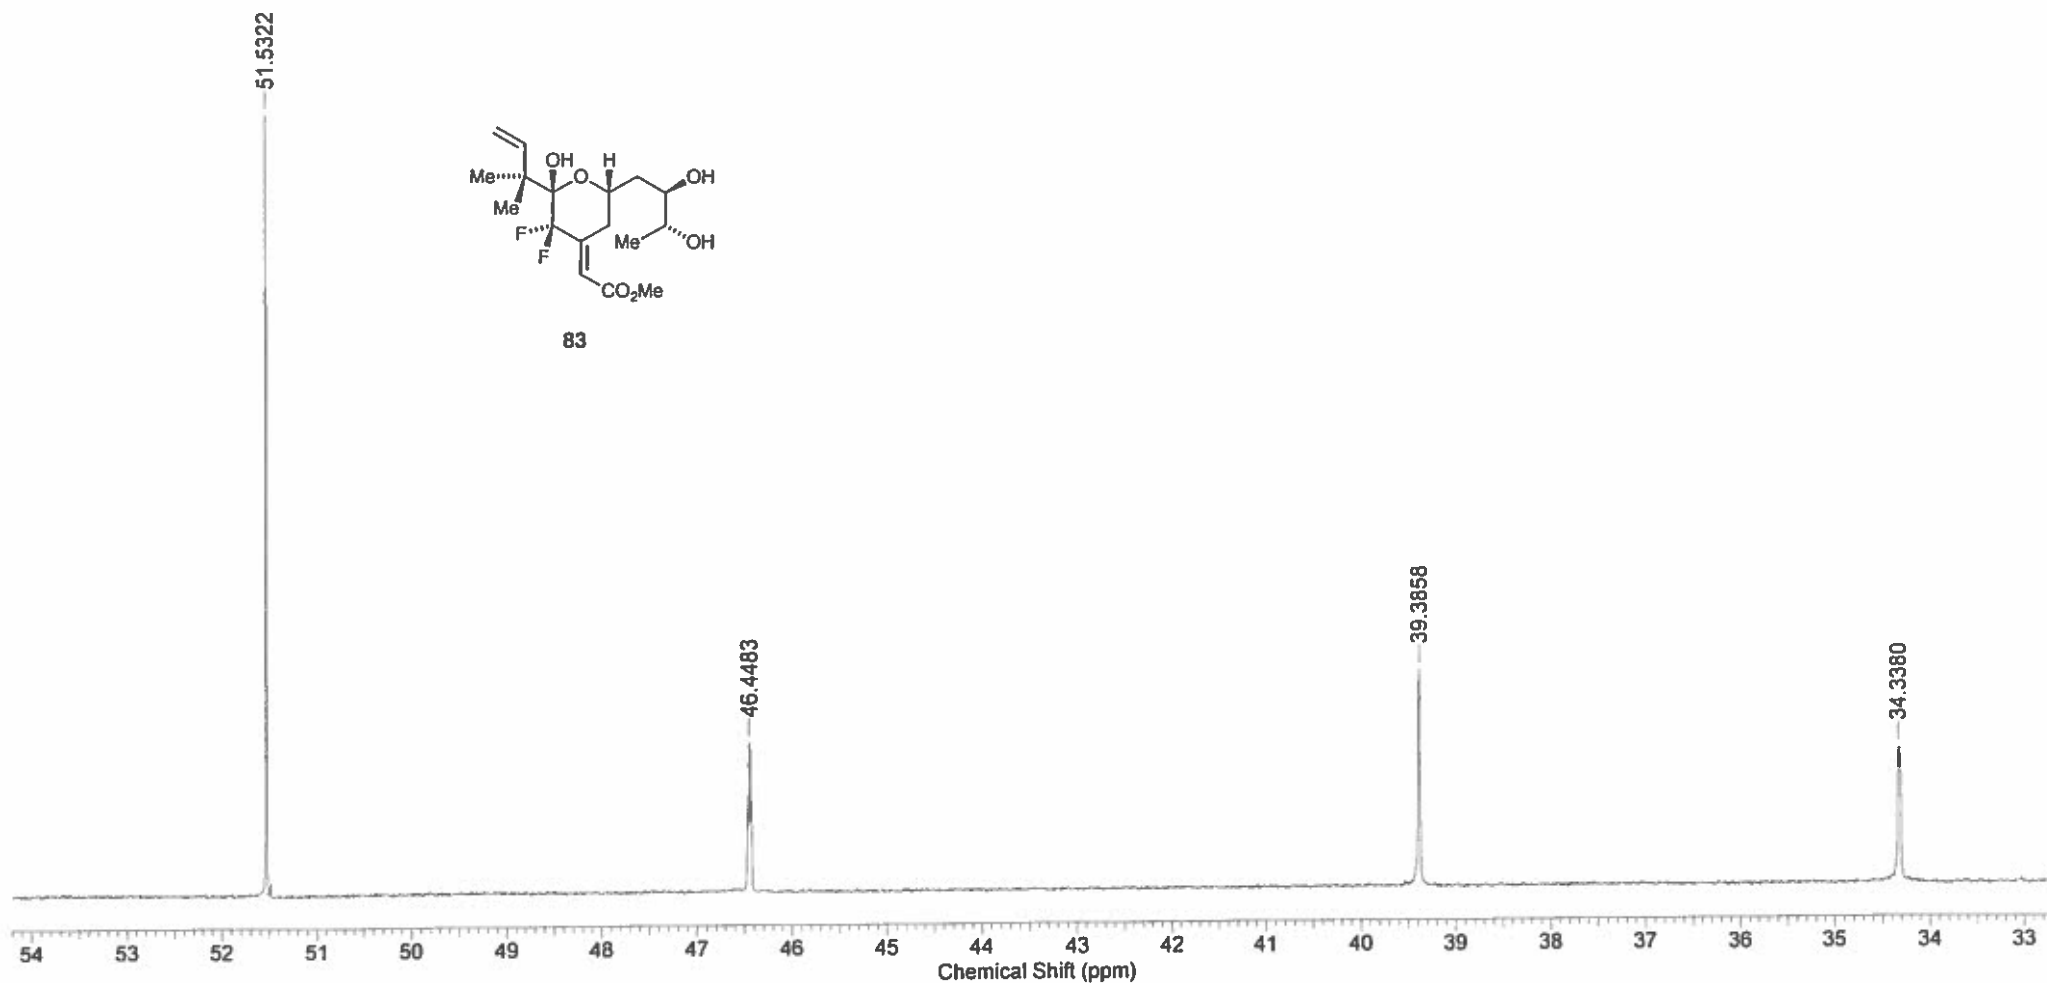

This report was created by ACD/NMR Processor Academic Edition. For more information go to [www.acdlabs.com/nmrproc/](http://www.acdlabs.com/nmrproc/)

|                        |                                                                                                                                        |                        |                      |                      |            |
|------------------------|----------------------------------------------------------------------------------------------------------------------------------------|------------------------|----------------------|----------------------|------------|
| Acquisition Time (sec) | 1.1010                                                                                                                                 |                        |                      |                      |            |
| Comment                | Research Group EJT Acad/Staff/PDRA/PG/JG PDRA 0215 129 EJT-PRM175 F6-28 11mg Mears P. mCARBON C6D6 (E:\bruk500cdata\2015\Feb) staff 53 |                        |                      |                      |            |
| Date                   | 28 Feb 2015 19:50:24                                                                                                                   | Date Stamp             | 28 Feb 2015 19:50:24 |                      |            |
| File Name              | \\ss7a.ds.man.ac.uk\vol5\vol3\users\snmrdata\bruk500cdata\2015\Feb\data\staff\nmr\2015-02-27-staff-53\11\fid                           |                        |                      | Frequency (MHz)      | 125.77     |
| Nucleus                | 13C                                                                                                                                    | Number of Transients   | 8192                 | Origin               | spect      |
| Owner                  | nmrsu                                                                                                                                  | Points Count           | 32768                | Pulse Sequence       | zgpg30     |
| SW(cyclical) (Hz)      | 29761.90                                                                                                                               | Solvent                | BENZENE-d6           | Receiver Gain        | 184.40     |
| Sweep Width (Hz)       | 29761.00                                                                                                                               | Temperature (degree C) | 22.153               | Spectrum Offset (Hz) | 12660.7109 |
|                        |                                                                                                                                        |                        |                      | Spectrum Type        | STANDARD   |

PRM175-CNMR.esp

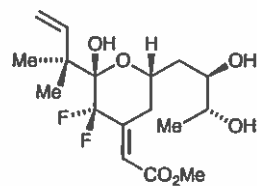

83

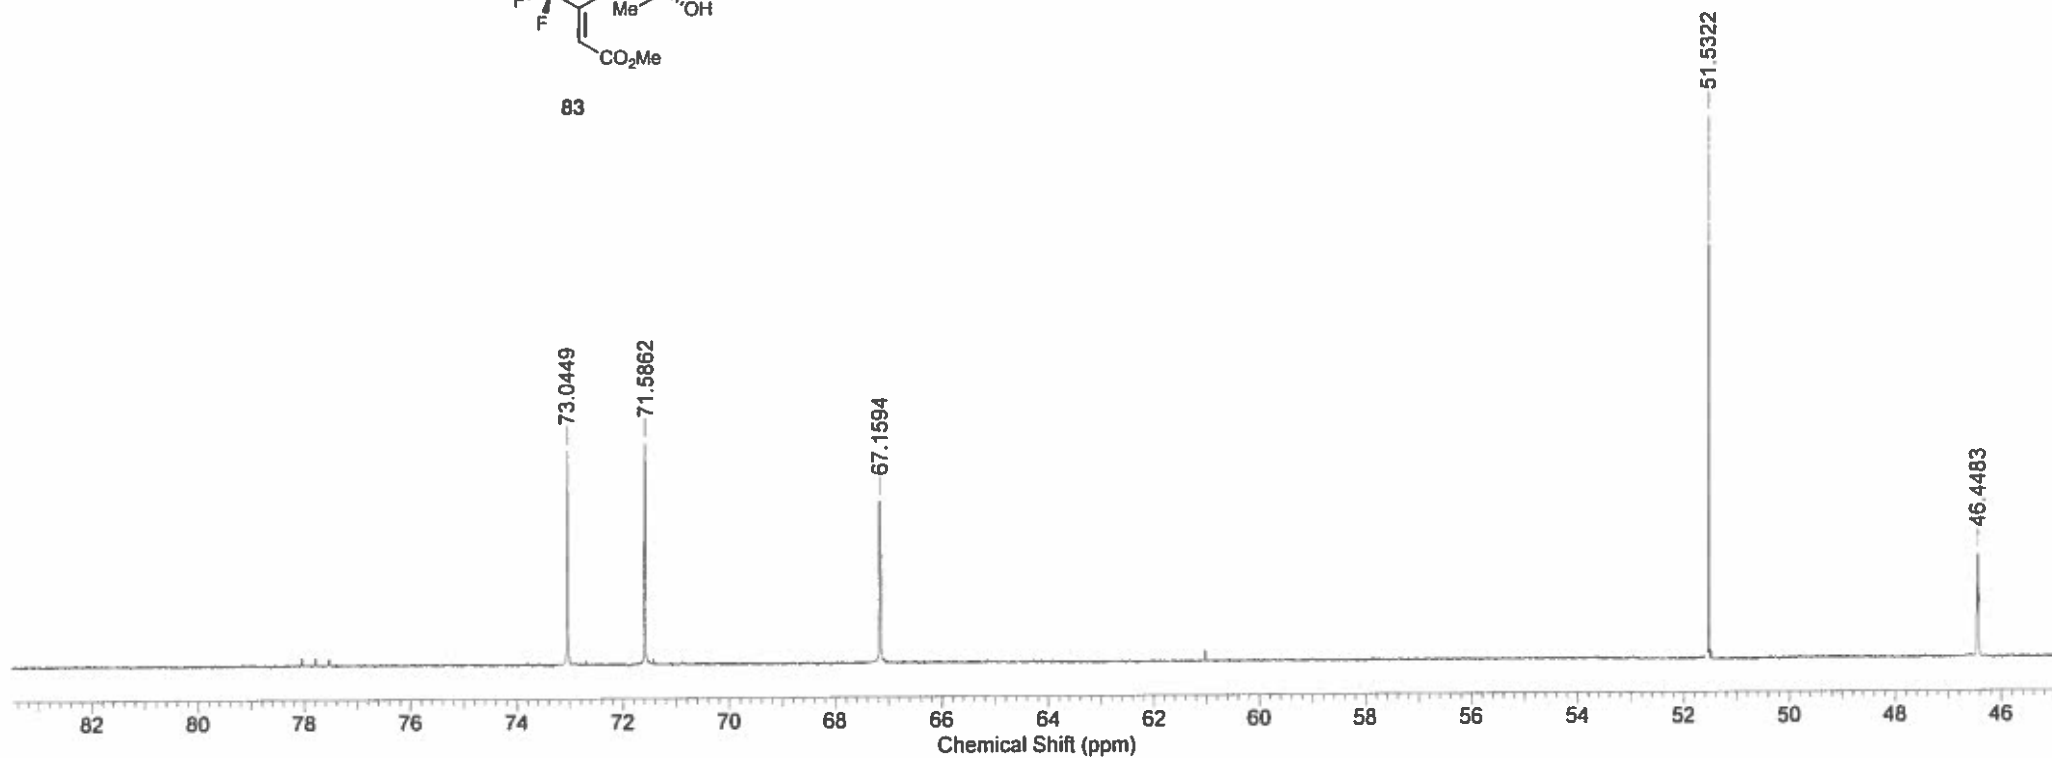

|                        |                                                                                                                                        |                        |                      |                      |                 |                       |          |
|------------------------|----------------------------------------------------------------------------------------------------------------------------------------|------------------------|----------------------|----------------------|-----------------|-----------------------|----------|
| Acquisition Time (sec) | 1.1010                                                                                                                                 |                        |                      |                      |                 |                       |          |
| Comment                | Research Group EJT Acad/Staff/PDRA/PG/UG PDRA 0215 129 EJT-PRM175 F6-28 11mg Mears P. mCARBON C6D6 (E:\bruk500cdata\2015\Feb) staff 53 |                        |                      |                      |                 |                       |          |
| Date                   | 28 Feb 2015 19:50:24                                                                                                                   | Date Stamp             | 28 Feb 2015 19:50:24 |                      |                 |                       |          |
| File Name              | \\ss7a.ds.man.ac.uk\vol5\vol3\users\snmrdata\bruk500cdata\2015\Feb\data\staff\nmr\2015-02-27-staff-53\11\fid                           |                        |                      |                      | Frequency (MHz) | 125.77                |          |
| Nucleus                | 13C                                                                                                                                    | Number of Transients   | 8192                 | Origin               | spect           | Original Points Count | 32768    |
| Owner                  | nmrsu                                                                                                                                  | Points Count           | 32768                | Pulse Sequence       | zgpg30          | Receiver Gain         | 184.40   |
| SW(cyclical) (Hz)      | 29761.90                                                                                                                               | Solvent                | BENZENE-d6           | Spectrum Offset (Hz) | 12660.7109      | Spectrum Type         | STANDARD |
| Sweep Width (Hz)       | 29761.00                                                                                                                               | Temperature (degree C) | 22.153               |                      |                 |                       |          |

PRM175-CNMR.esp

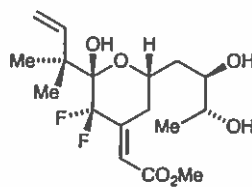

83

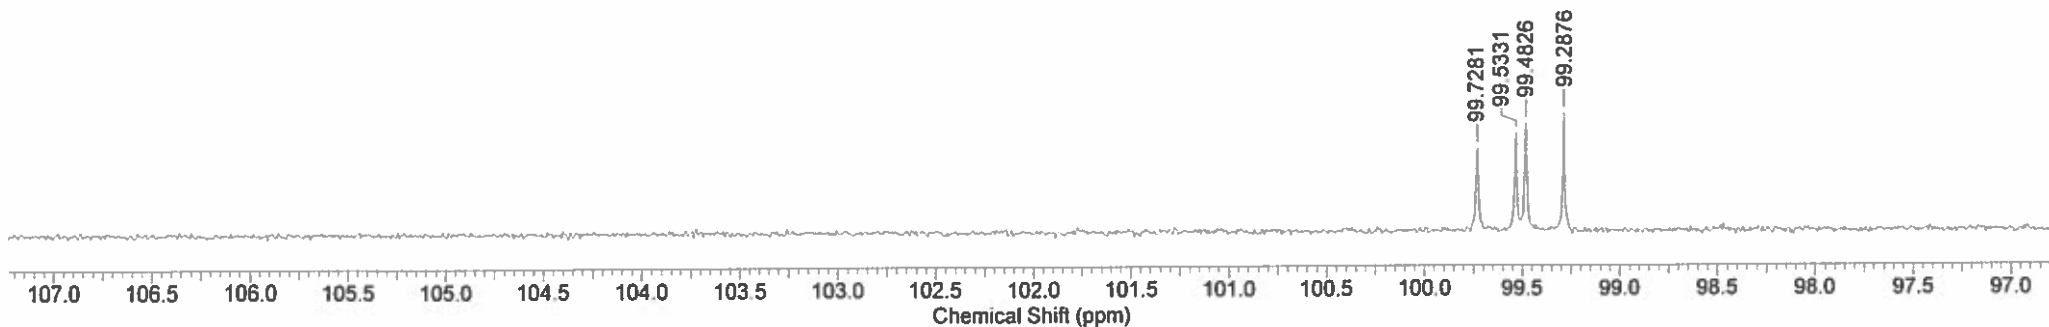

This report was created by ACD/NMR Processor Academic Edition. For more information go to [www.acdlabs.com/nmrproc/](http://www.acdlabs.com/nmrproc/)

|                        |                                                                                                                                        |                        |                      |                      |                 |                       |          |
|------------------------|----------------------------------------------------------------------------------------------------------------------------------------|------------------------|----------------------|----------------------|-----------------|-----------------------|----------|
| Acquisition Time (sec) | 1.1010                                                                                                                                 |                        |                      |                      |                 |                       |          |
| Comment                | Research Group EJT Acad/Staff/PDRA/PG/UG PDRA 0215 129 EJT-PRM175 F6-28 11mg Mears P. mCARBON C6D6 (E:\bruk500cdata\2015\Feb) staff 53 |                        |                      |                      |                 |                       |          |
| Date                   | 28 Feb 2015 19:50:24                                                                                                                   | Date Stamp             | 28 Feb 2015 19:50:24 |                      |                 |                       |          |
| File Name              | \\ss7a.ds.man.ac.uk\vol5\vol3\users\snmrdata\bruk500cdata\2015\Feb\data\staff\nmr\2015-02-27-staff-53\11\fid                           |                        |                      |                      | Frequency (MHz) | 125.77                |          |
| Nucleus                | 13C                                                                                                                                    | Number of Transients   | 8192                 | Origin               | spect           | Original Points Count | 32768    |
| Owner                  | nmrsu                                                                                                                                  | Points Count           | 32768                | Pulse Sequence       | zgpg30          | Receiver Gain         | 184.40   |
| SW(cyclical) (Hz)      | 29761.90                                                                                                                               | Solvent                | BENZENE-d6           | Spectrum Offset (Hz) | 12660.7109      | Spectrum Type         | STANDARD |
| Sweep Width (Hz)       | 29761.00                                                                                                                               | Temperature (degree C) | 22.153               |                      |                 |                       |          |

PRM175-CNMR.esp

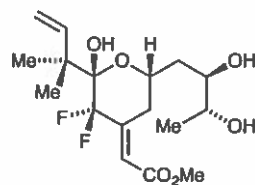

83

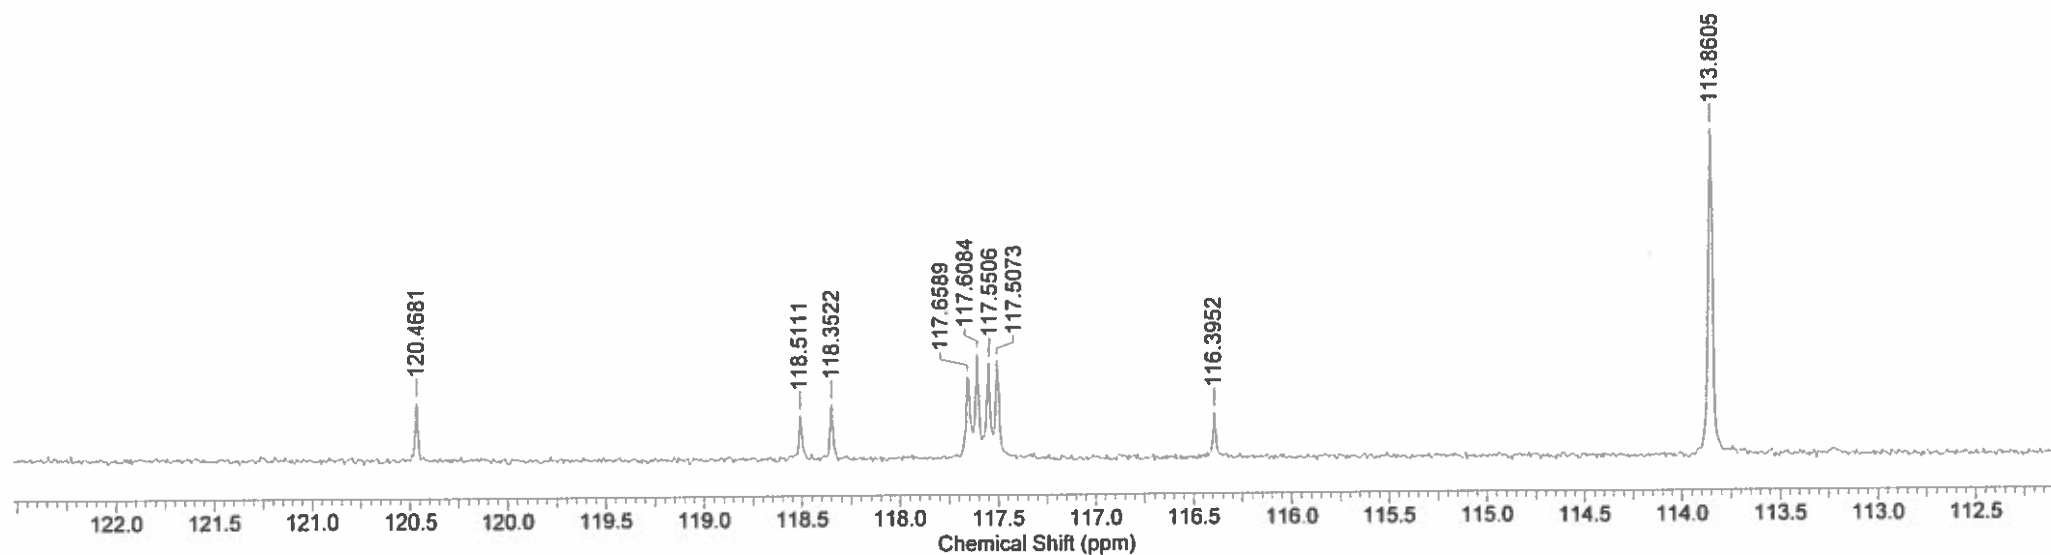

|                        |                                                                                                                                        |                        |                      |                      |                 |                       |          |
|------------------------|----------------------------------------------------------------------------------------------------------------------------------------|------------------------|----------------------|----------------------|-----------------|-----------------------|----------|
| Acquisition Time (sec) | 1.1010                                                                                                                                 |                        |                      |                      |                 |                       |          |
| Comment                | Research Group EJT Acad/Staff/PDRA/PG/UG PDRA 0215 129 EJT-PRM175 F6-28 11mg Mears P. mCARBON C6D6 (E:\bruk500cdata\2015\Feb) staff 53 |                        |                      |                      |                 |                       |          |
| Date                   | 28 Feb 2015 19:50:24                                                                                                                   | Date Stamp             | 28 Feb 2015 19:50:24 |                      |                 |                       |          |
| File Name              | \ss7a.ds.man.ac.uk\vol5\vol3\users\snmrdata\bruk500cdata\2015\Feb\data\staff\nmr\2015-02-27-staff-53\11\vid                            |                        |                      |                      | Frequency (MHz) | 125.77                |          |
| Nucleus                | 13C                                                                                                                                    | Number of Transients   | 8192                 | Origin               | spect           | Original Points Count | 32768    |
| Owner                  | nmsu                                                                                                                                   | Points Count           | 32768                | Pulse Sequence       | zgpg30          | Receiver Gain         | 184.40   |
| SW(cyclical) (Hz)      | 29761.90                                                                                                                               | Solvent                | BENZENE-d6           | Spectrum Offset (Hz) | 12660.7109      | Spectrum Type         | STANDARD |
| Sweep Width (Hz)       | 29761.00                                                                                                                               | Temperature (degree C) | 22.153               |                      |                 |                       |          |

PRM175-CNMR.esp

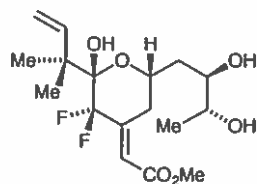

83

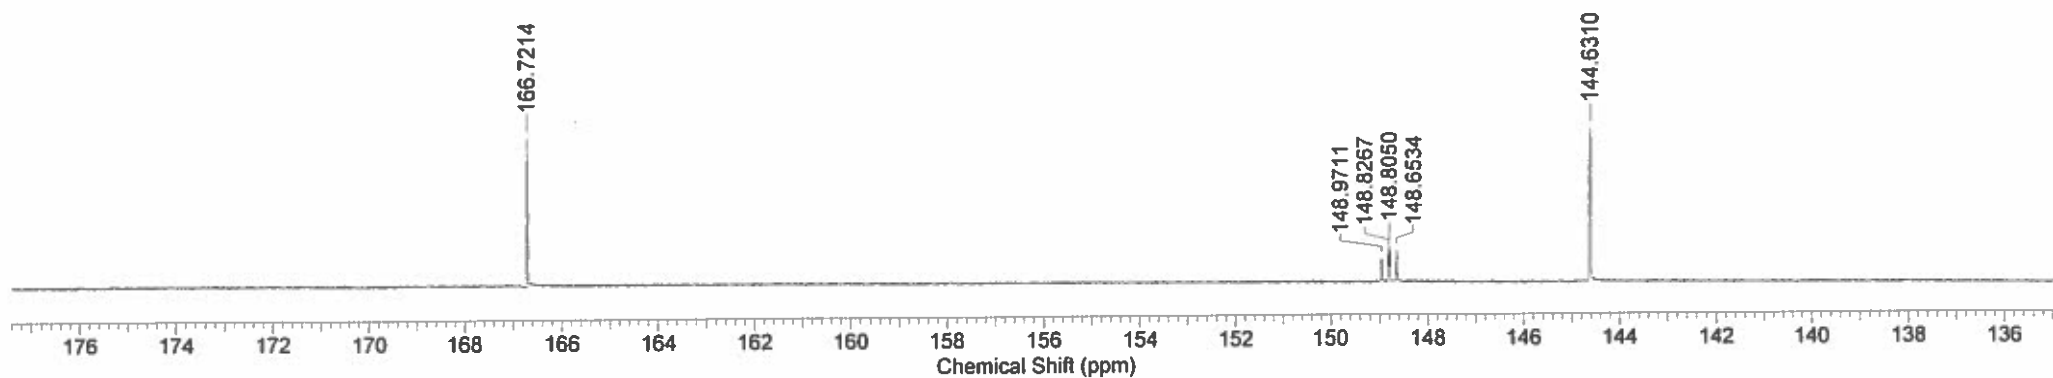

This report was created by ACD/NMR Processor Academic Edition. For more information go to [www.acdlabs.com/nmrproc/](http://www.acdlabs.com/nmrproc/)

|                        |                                                                                                                |                        |                                                                      |                      |             |
|------------------------|----------------------------------------------------------------------------------------------------------------|------------------------|----------------------------------------------------------------------|----------------------|-------------|
| Acquisition Time (sec) | 0.7340                                                                                                         | Comment                | EJT-PRM175 f6-28 11mg mF19CPD C6D6 (e:\bruk400adata\2015\Feb) ejt 45 |                      |             |
| Date                   | 25 Feb 2015 18:46:24                                                                                           |                        | Date Stamp                                                           | 25 Feb 2015 18:46:24 |             |
| File Name              | \\ss7a.ds.man.ac.uk\vol5\vol3\users\snmrdata\bruk400adata\2015\Feb\data\ejt\nmr\2015-02-25-ejt-45\14\PDAT\1\1r |                        |                                                                      | Frequency (MHz)      | 376.50      |
| Nucleus                | 19F                                                                                                            | Number of Transients   | 16                                                                   | Origin               | AV400       |
| Owner                  | nmrsu                                                                                                          | Points Count           | 262144                                                               | Pulse Sequence       | zgig        |
| SW(cyclical) (Hz)      | 89285.71                                                                                                       | Solvent                | BENZENE-d6                                                           | Receiver Gain        | 322.00      |
| Sweep Width (Hz)       | 89285.37                                                                                                       | Temperature (degree C) | 19.900                                                               | Spectrum Offset (Hz) | -37649.5977 |
|                        |                                                                                                                |                        |                                                                      | Spectrum Type        | STANDARD    |

PRM175-F(H)NMR.esp

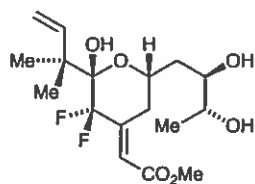

83

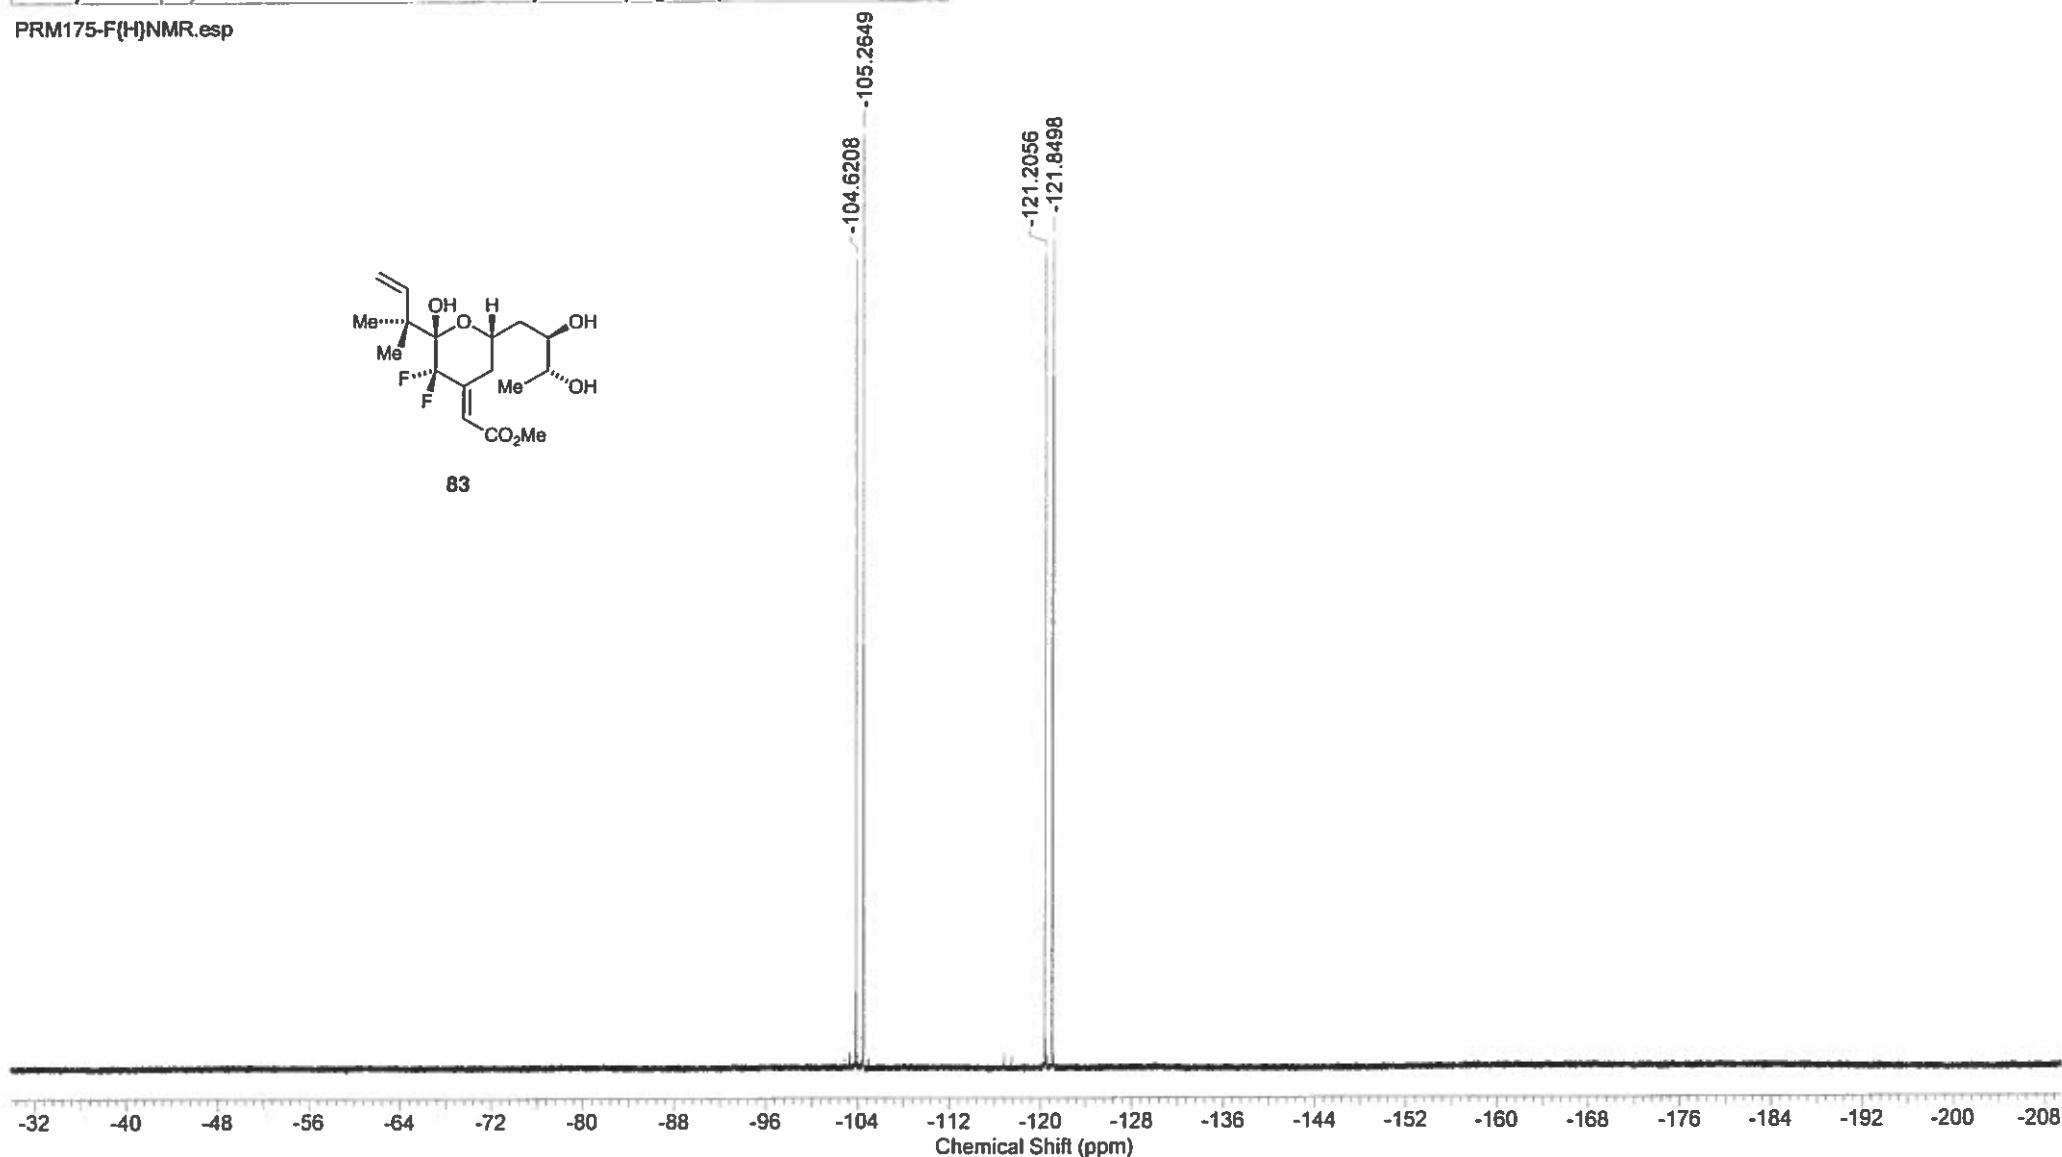

This report was created by ACD/NMR Processor Academic Edition. For more information go to [www.acdlabs.com/nmrproc/](http://www.acdlabs.com/nmrproc/)

|                        |                                                                                                              |                        |                                                                                     |                      |           |
|------------------------|--------------------------------------------------------------------------------------------------------------|------------------------|-------------------------------------------------------------------------------------|----------------------|-----------|
| Acquisition Time (sec) | 3.2768                                                                                                       | Comment                | 0315 160 Mears P. EJT-PRM176 "C25" mPROTON C6D6 (E:\bruk500cdata\2015\Mar) staff 56 |                      |           |
| Date                   | 21 Mar 2015 20:43:44                                                                                         | Date Stamp             | 21 Mar 2015 20:43:44                                                                |                      |           |
| File Name              | \\ss7a.ds.man.ac.uk\vol5\vol3\users\snmrdata\bruk500cdata\2015\Mar\data\staff\nmr\2015-03-20-staff-56\10\fid |                        |                                                                                     | Frequency (MHz)      | 500.19    |
| Nucleus                | <sup>1</sup> H                                                                                               | Number of Transients   | 32                                                                                  | Origin               | spect     |
| Owner                  | nmrsu                                                                                                        | Points Count           | 32768                                                                               | Pulse Sequence       | zg30      |
| SW(cyclical) (Hz)      | 10000.00                                                                                                     | Solvent                | BENZENE-d6                                                                          | Spectrum Offset (Hz) | 3092.6208 |
| Sweep Width (Hz)       | 9999.70                                                                                                      | Temperature (degree C) | 22.153                                                                              | Spectrum Type        | STANDARD  |

PRM176-C25-HNMR.esp

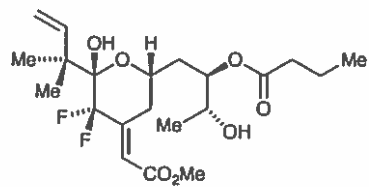

84

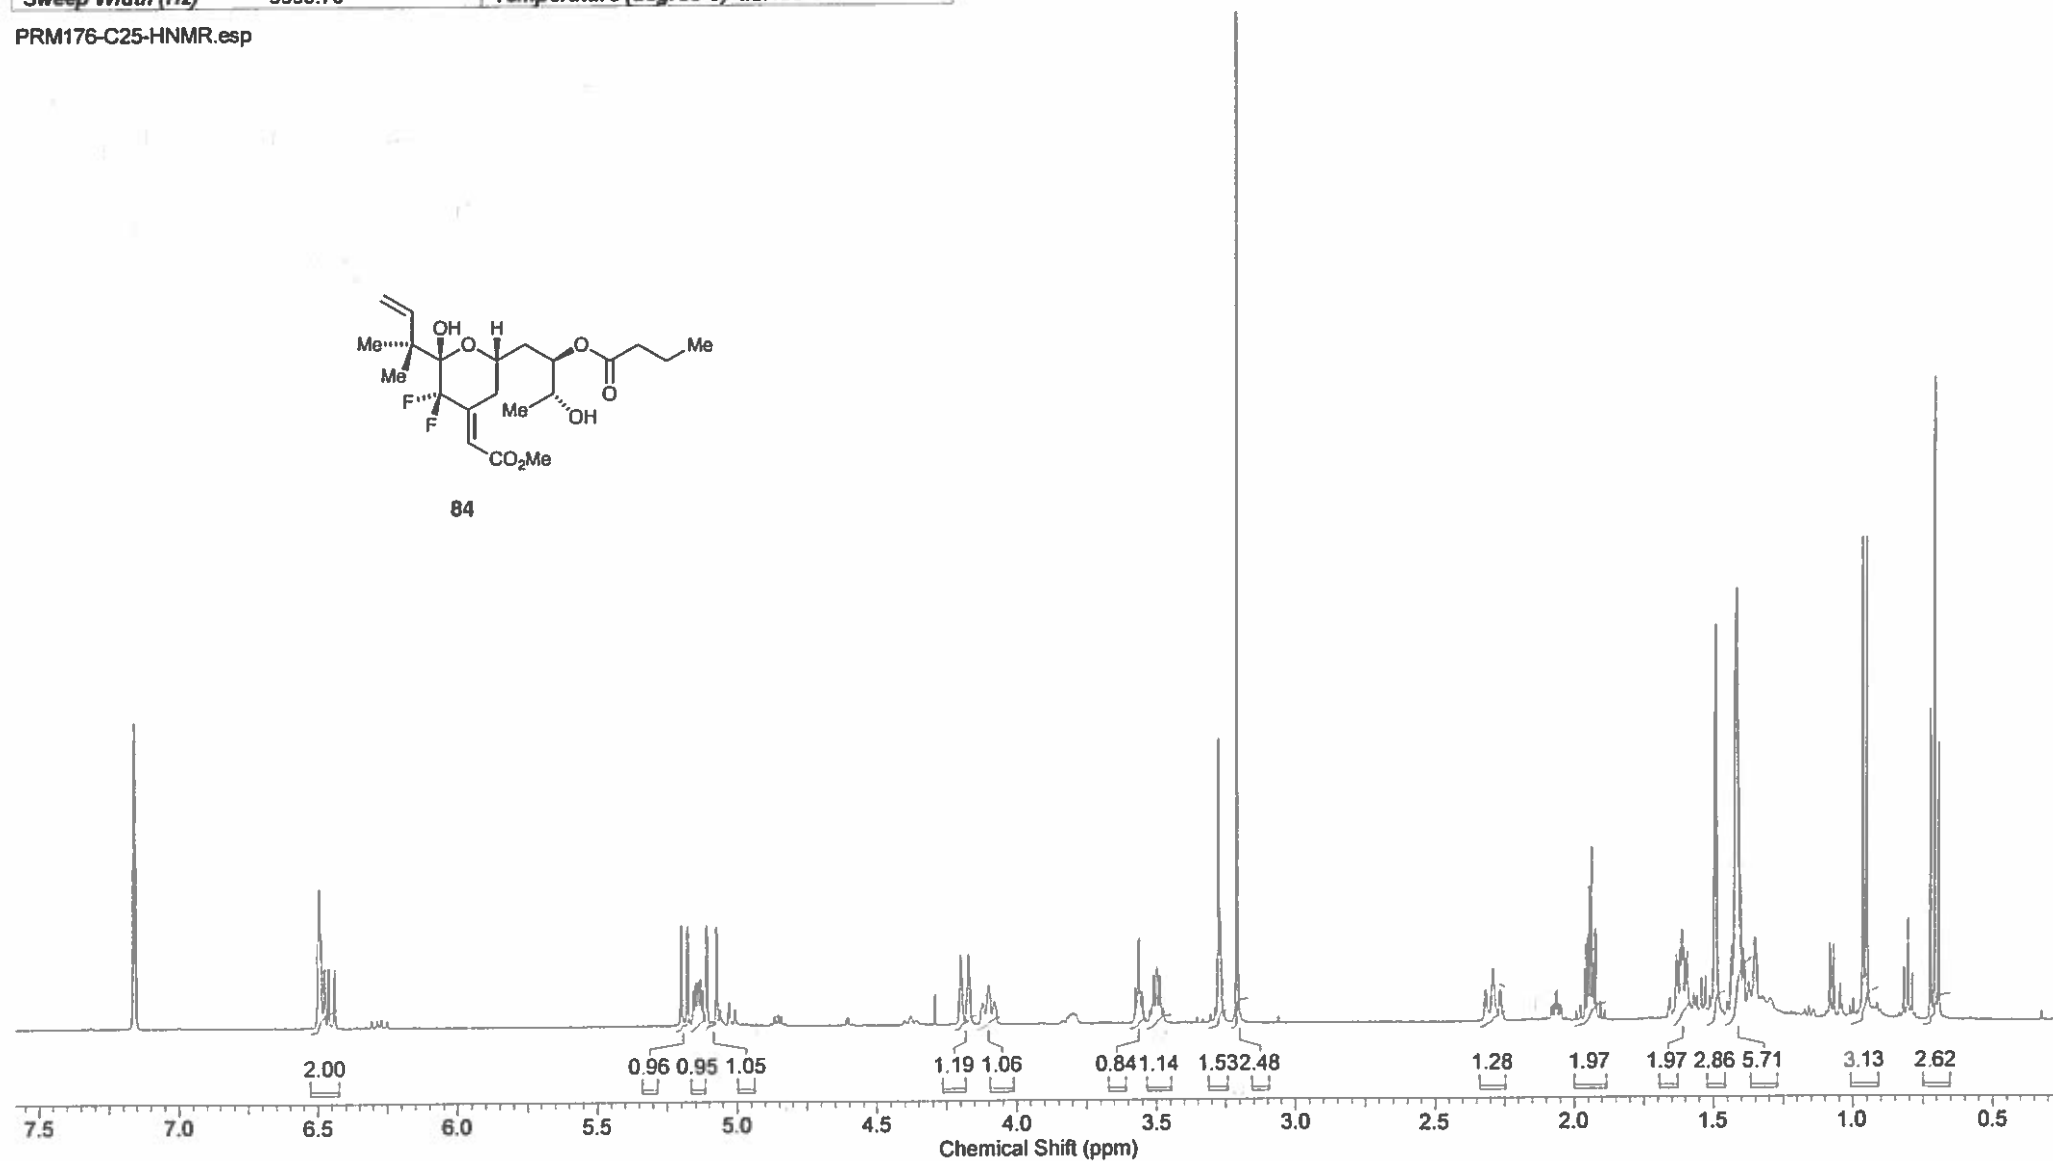

This report was created by ACD/NMR Processor Academic Edition. For more information go to [www.acdlabs.com/nmrproc/](http://www.acdlabs.com/nmrproc/)

This report was created by ACD/NMR Processor Academic Edition. For more information go to [www.acdlabs.com/nmr/processor/](http://www.acdlabs.com/nmr/processor/)

|                        |                                                                                                             |                        |                                                                                    |                      |            |                       |          |
|------------------------|-------------------------------------------------------------------------------------------------------------|------------------------|------------------------------------------------------------------------------------|----------------------|------------|-----------------------|----------|
| Acquisition Time (sec) | 1.1010                                                                                                      | Comment                | 0315 160 Mears P. EJT-PRM176 "C25" mCARBON C6D6 (E:\bruk500cdata\2015Mar) staff 56 |                      |            |                       |          |
| Date                   | 22 Mar 2015 05:45:36                                                                                        | Date Stamp             | 22 Mar 2015 05:45:36                                                               |                      |            |                       |          |
| File Name              | \\ss7a.ds.man.ac.uk\vol5\vol3\users\snmrdata\bruk500cdata\2015Mar\data\staff\nmr\2015-03-20-staff-56\11\fid |                        |                                                                                    |                      |            | Frequency (MHz)       | 125.77   |
| Nucleus                | 13C                                                                                                         | Number of Transients   | 10240                                                                              | Origin               | spect      | Original Points Count | 32768    |
| Owner                  | nmrsl                                                                                                       | Points Count           | 32768                                                                              | Pulse Sequence       | zgpg30     | Receiver Gain         | 184.40   |
| SW(cyclical) (Hz)      | 29761.90                                                                                                    | Solvent                | BENZENE-d6                                                                         | Spectrum Offset (Hz) | 12661.6182 | Spectrum Type         | STANDARD |
| Sweep Width (Hz)       | 29761.00                                                                                                    | Temperature (degree C) | 22.164                                                                             |                      |            |                       |          |

PRM176-C25-CNMR.esp

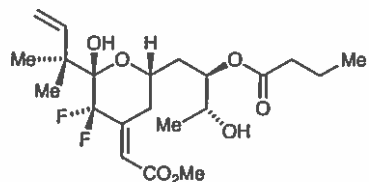

84

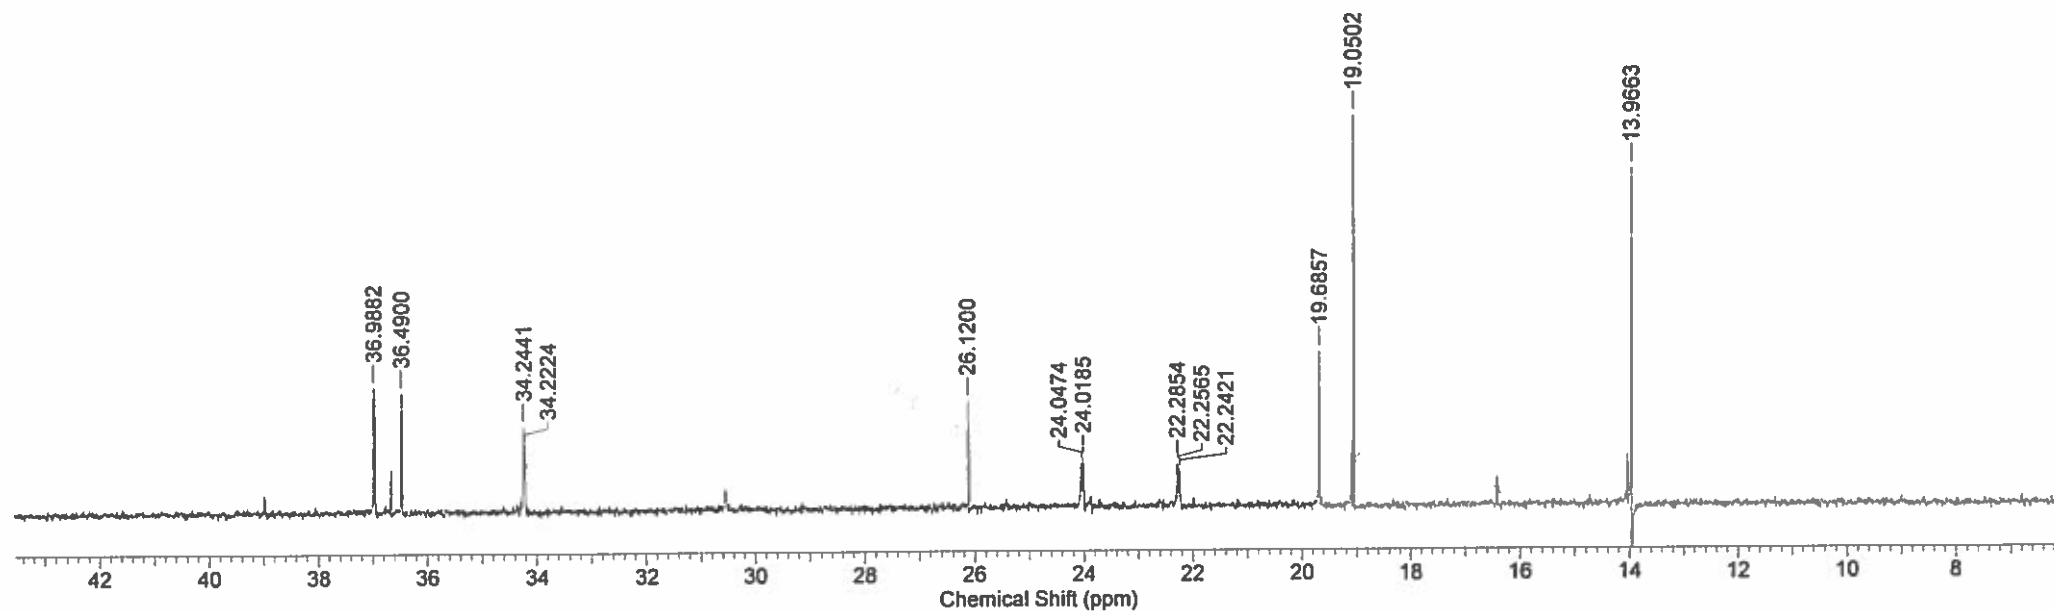



This report was created by ACD/NMR Processor Academic Edition. For more information go to [www.acdlabs.com/nmrproc/](http://www.acdlabs.com/nmrproc/)

This report was created by ACD/NAME 1 Processor Academic Edition. For more information, go to www.accdatabases.com/prod.

|                        |                                                                                                             |                        |                                                                                     |                      |            |                       |          |
|------------------------|-------------------------------------------------------------------------------------------------------------|------------------------|-------------------------------------------------------------------------------------|----------------------|------------|-----------------------|----------|
| Acquisition Time (sec) | 1.1010                                                                                                      | Comment                | 0315 160 Mears P. EJT-PRM176 "C25" mCARBON C6D6 (E:\bruk500cdata\2015\Mar) staff 56 |                      |            |                       |          |
| Date                   | 22 Mar 2015 05:45:36                                                                                        | Date Stamp             | 22 Mar 2015 05:45:36                                                                |                      |            |                       |          |
| File Name              | \\ss7a.ds.man.ac.uk\vol5\vol3\users\snmrdata\bruk500cdata\2015\Mar\data\staff\nmr\2015-03-20-staff-56\11Vid |                        |                                                                                     | Frequency (MHz)      | 125.77     |                       |          |
| Nucleus                | <sup>13</sup> C                                                                                             | Number of Transients   | 10240                                                                               | Origin               | spect      | Original Points Count | 32768    |
| Owner                  | nmrsu                                                                                                       | Points Count           | 32768                                                                               | Pulse Sequence       | zgpg30     | Receiver Gain         | 184.40   |
| SW(cyclical) (Hz)      | 29761.90                                                                                                    | Solvent                | BENZENE-d6                                                                          | Spectrum Offset (Hz) | 12661.6182 | Spectrum Type         | STANDARD |
| Sweep Width (Hz)       | 29761.00                                                                                                    | Temperature (degree C) | 22.164                                                                              |                      |            |                       |          |

PRM176-C25-CNMR.esp

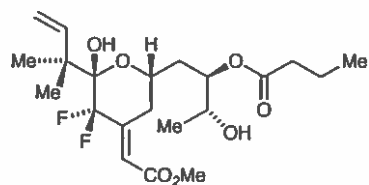

84

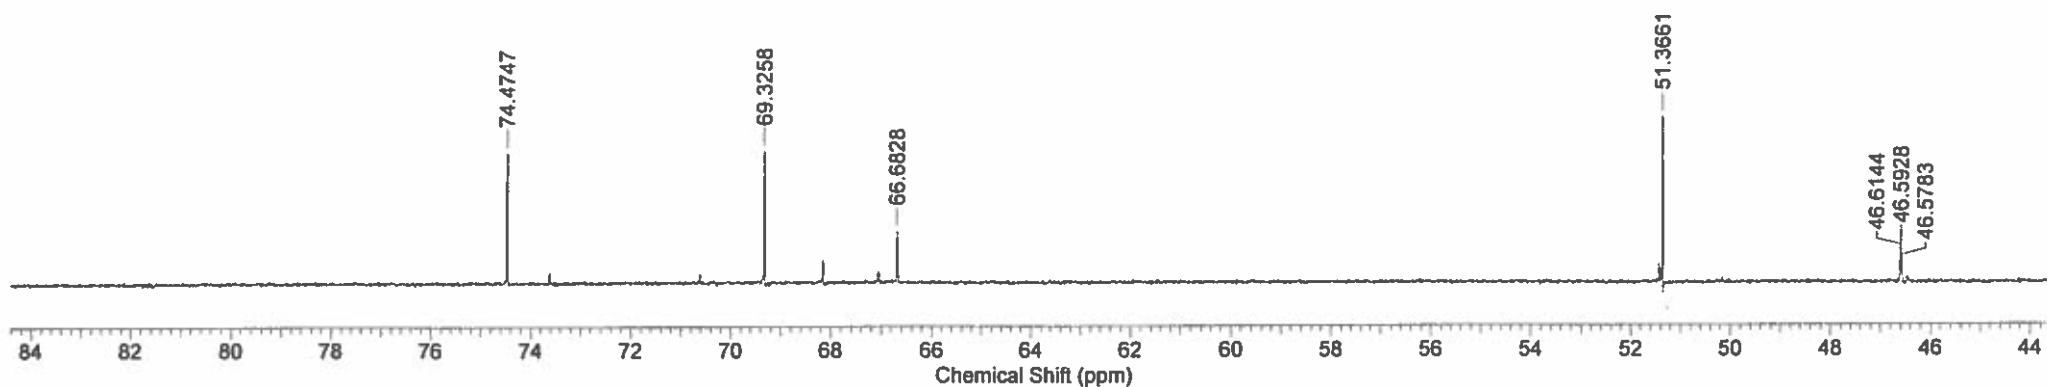

This report was created by ACD/NMR Processor Academic Edition. For more information go to [www.acdlabs.com/nmrproc/](http://www.acdlabs.com/nmrproc/)

|                        |                                                                                                           |                        |                                                                                    |                      |            |
|------------------------|-----------------------------------------------------------------------------------------------------------|------------------------|------------------------------------------------------------------------------------|----------------------|------------|
| Acquisition Time (sec) | 1.1010                                                                                                    | Comment                | 0315 160 Mears P. EJT-PRM176 "C25" mCARBON C6D6 (E:\bruk500cdata\2015Mar) staff 56 |                      |            |
| Date                   | 22 Mar 2015 05:45:36                                                                                      | Date Stamp             | 22 Mar 2015 05:45:36                                                               |                      |            |
| File Name              | \ss7a.ds.man.ac.uk\vol5\vol3\users\snmrdata\bruk500cdata\2015Mar\data\staff\nmr\2015-03-20-staff-56\11Vid |                        |                                                                                    | Frequency (MHz)      | 125.77     |
| Nucleus                | <sup>13</sup> C                                                                                           | Number of Transients   | 10240                                                                              | Origin               | spect      |
| Owner                  | nmr-su                                                                                                    | Points Count           | 32768                                                                              | Pulse Sequence       | zgpg30     |
| SW(cyclical) (Hz)      | 29761.90                                                                                                  | Solvent                | BENZENE-d6                                                                         | Receiver Gain        | 184.40     |
| Sweep Width (Hz)       | 29761.00                                                                                                  | Temperature (degree C) | 22.164                                                                             | Spectrum Offset (Hz) | 12661.6182 |
|                        |                                                                                                           |                        |                                                                                    | Spectrum Type        | STANDARD   |

PRM176-C25-CNMR.esp

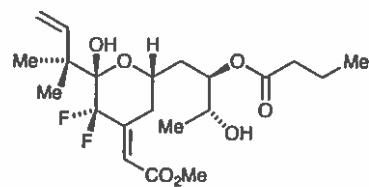

84

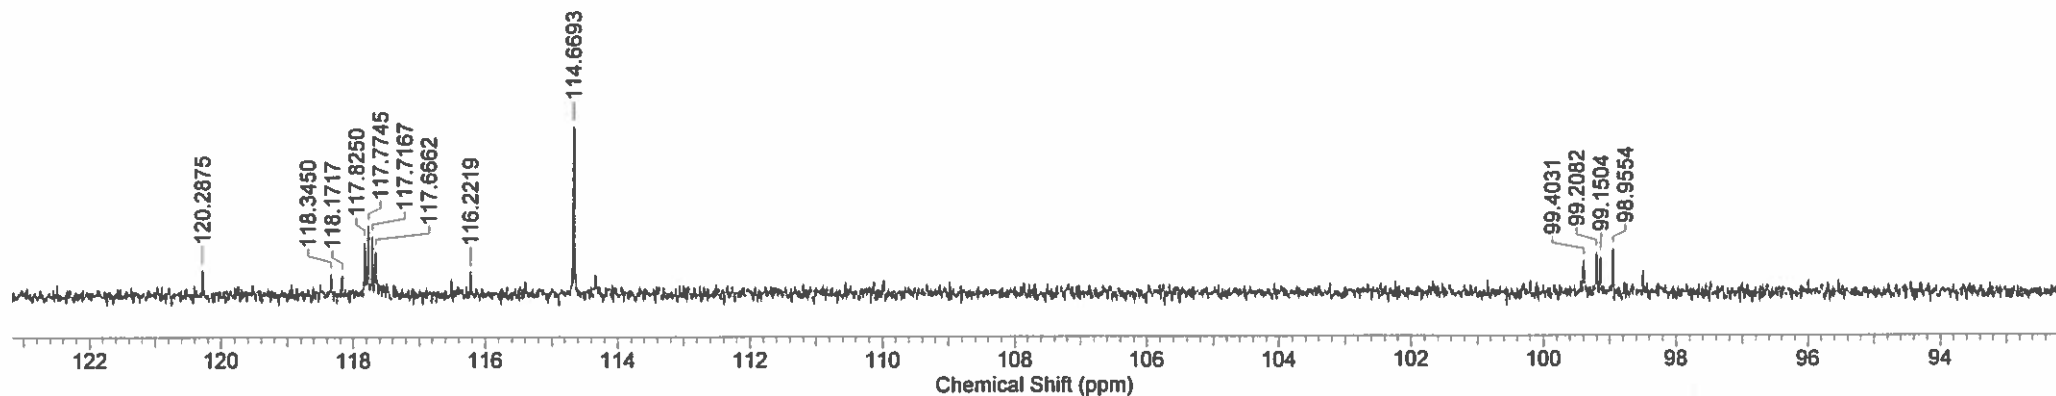

This report was created by ACD/NMR Processor Academic Edition. For more information go to [www.acdlabs.com/nmrproc/](http://www.acdlabs.com/nmrproc/)

|                        |                                                                                                             |                        |                                                                                    |                      |            |
|------------------------|-------------------------------------------------------------------------------------------------------------|------------------------|------------------------------------------------------------------------------------|----------------------|------------|
| Acquisition Time (sec) | 1.1010                                                                                                      | Comment                | 0315 160 Mears P. EJT-PRM176 "C25" mCARBON C6D6 [E:\bruk500cdata\2015Mar] staff 56 |                      |            |
| Date                   | 22 Mar 2015 05:45:36                                                                                        | Date Stamp             | 22 Mar 2015 05:45:36                                                               |                      |            |
| File Name              | \\ss7a.ds.man.ac.uk\vol5\vol3\users\snmrdata\bruk500cdata\2015Mar\data\staff\nmr\2015-03-20-staff-56\11\fid |                        |                                                                                    | Frequency (MHz)      | 125.77     |
| Nucleus                | <sup>13</sup> C                                                                                             | Number of Transients   | 10240                                                                              | Origin               | spect      |
| Owner                  | nrmrsu                                                                                                      | Points Count           | 32768                                                                              | Pulse Sequence       | zgpg30     |
| SW(cyclical) (Hz)      | 29761.90                                                                                                    | Solvent                | BENZENE-d6                                                                         | Receiver Gain        | 184.40     |
| Sweep Width (Hz)       | 29761.00                                                                                                    | Temperature (degree C) | 22.164                                                                             | Spectrum Offset (Hz) | 12661.6182 |
|                        |                                                                                                             |                        |                                                                                    | Spectrum Type        | STANDARD   |

PRM176-C25-CNMR.esp

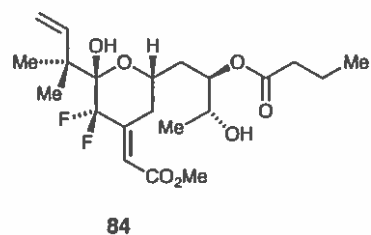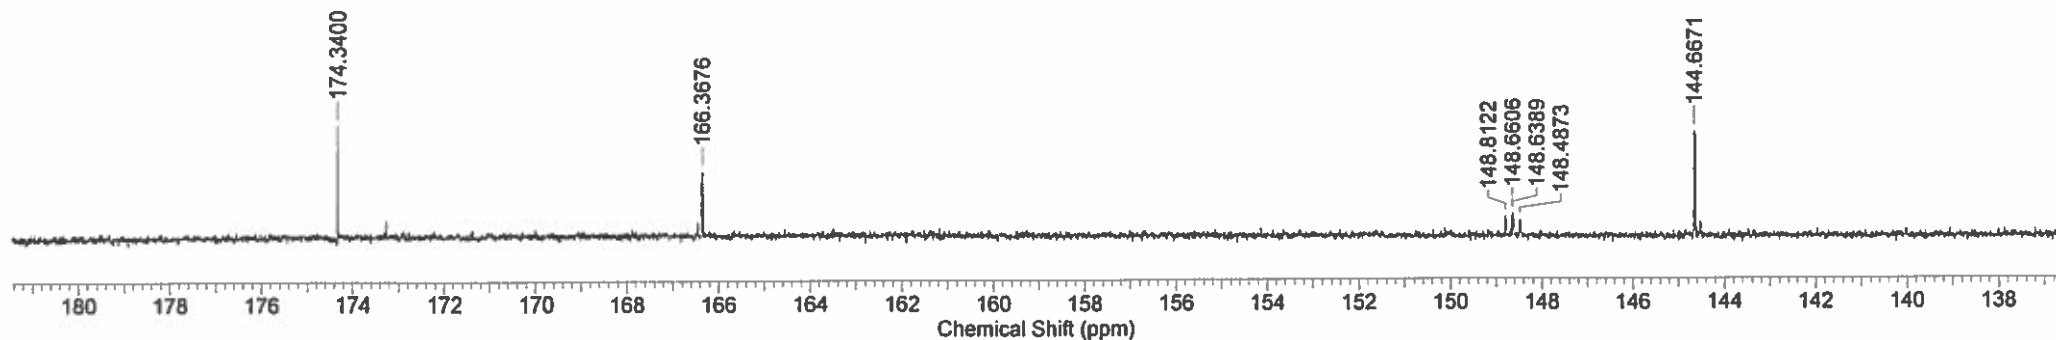

This report was created by ACD/NMR Processor Academic Edition. For more information go to [www.acdlabs.com/nmrproc/](http://www.acdlabs.com/nmrproc/)

|                        |                                                                                                          |                        |                                                                                        |                      |             |
|------------------------|----------------------------------------------------------------------------------------------------------|------------------------|----------------------------------------------------------------------------------------|----------------------|-------------|
| Acquisition Time (sec) | 0.7340                                                                                                   | Comment                | EJT-PRM176 2nd re-col. f4-12 7mg mF19_cryo_zgbs C6D6 (e:\bruk400cdata\2015\Feb) ejt 44 |                      |             |
| Date                   | 05 Mar 2015 17:46:40                                                                                     | Date Stamp             | 05 Mar 2015 17:46:40                                                                   |                      |             |
| File Name              | \\ss7a.ds.man.ac.uk\vol5\vol3\users\snmrdata\bruk400cdata\2015\Feb\data\ejt\nmr\2015-03-05-ejt-44\11\fid |                        |                                                                                        | Frequency (MHz)      | 376.44      |
| Nucleus                | <sup>19</sup> F                                                                                          | Number of Transients   | 16                                                                                     | Origin               | spect       |
| Owner                  | nrmru                                                                                                    | Points Count           | 65536                                                                                  | Pulse Sequence       | zgbs        |
| SW(cyclical) (Hz)      | 89285.71                                                                                                 | Solvent                | BENZENE-d6                                                                             | Spectrum Offset (Hz) | -37644.8594 |
| Sweep Width (Hz)       | 89284.35                                                                                                 | Temperature (degree C) | 15.742                                                                                 | Spectrum Type        | STANDARD    |

PRM176-C25-FNMR.esp

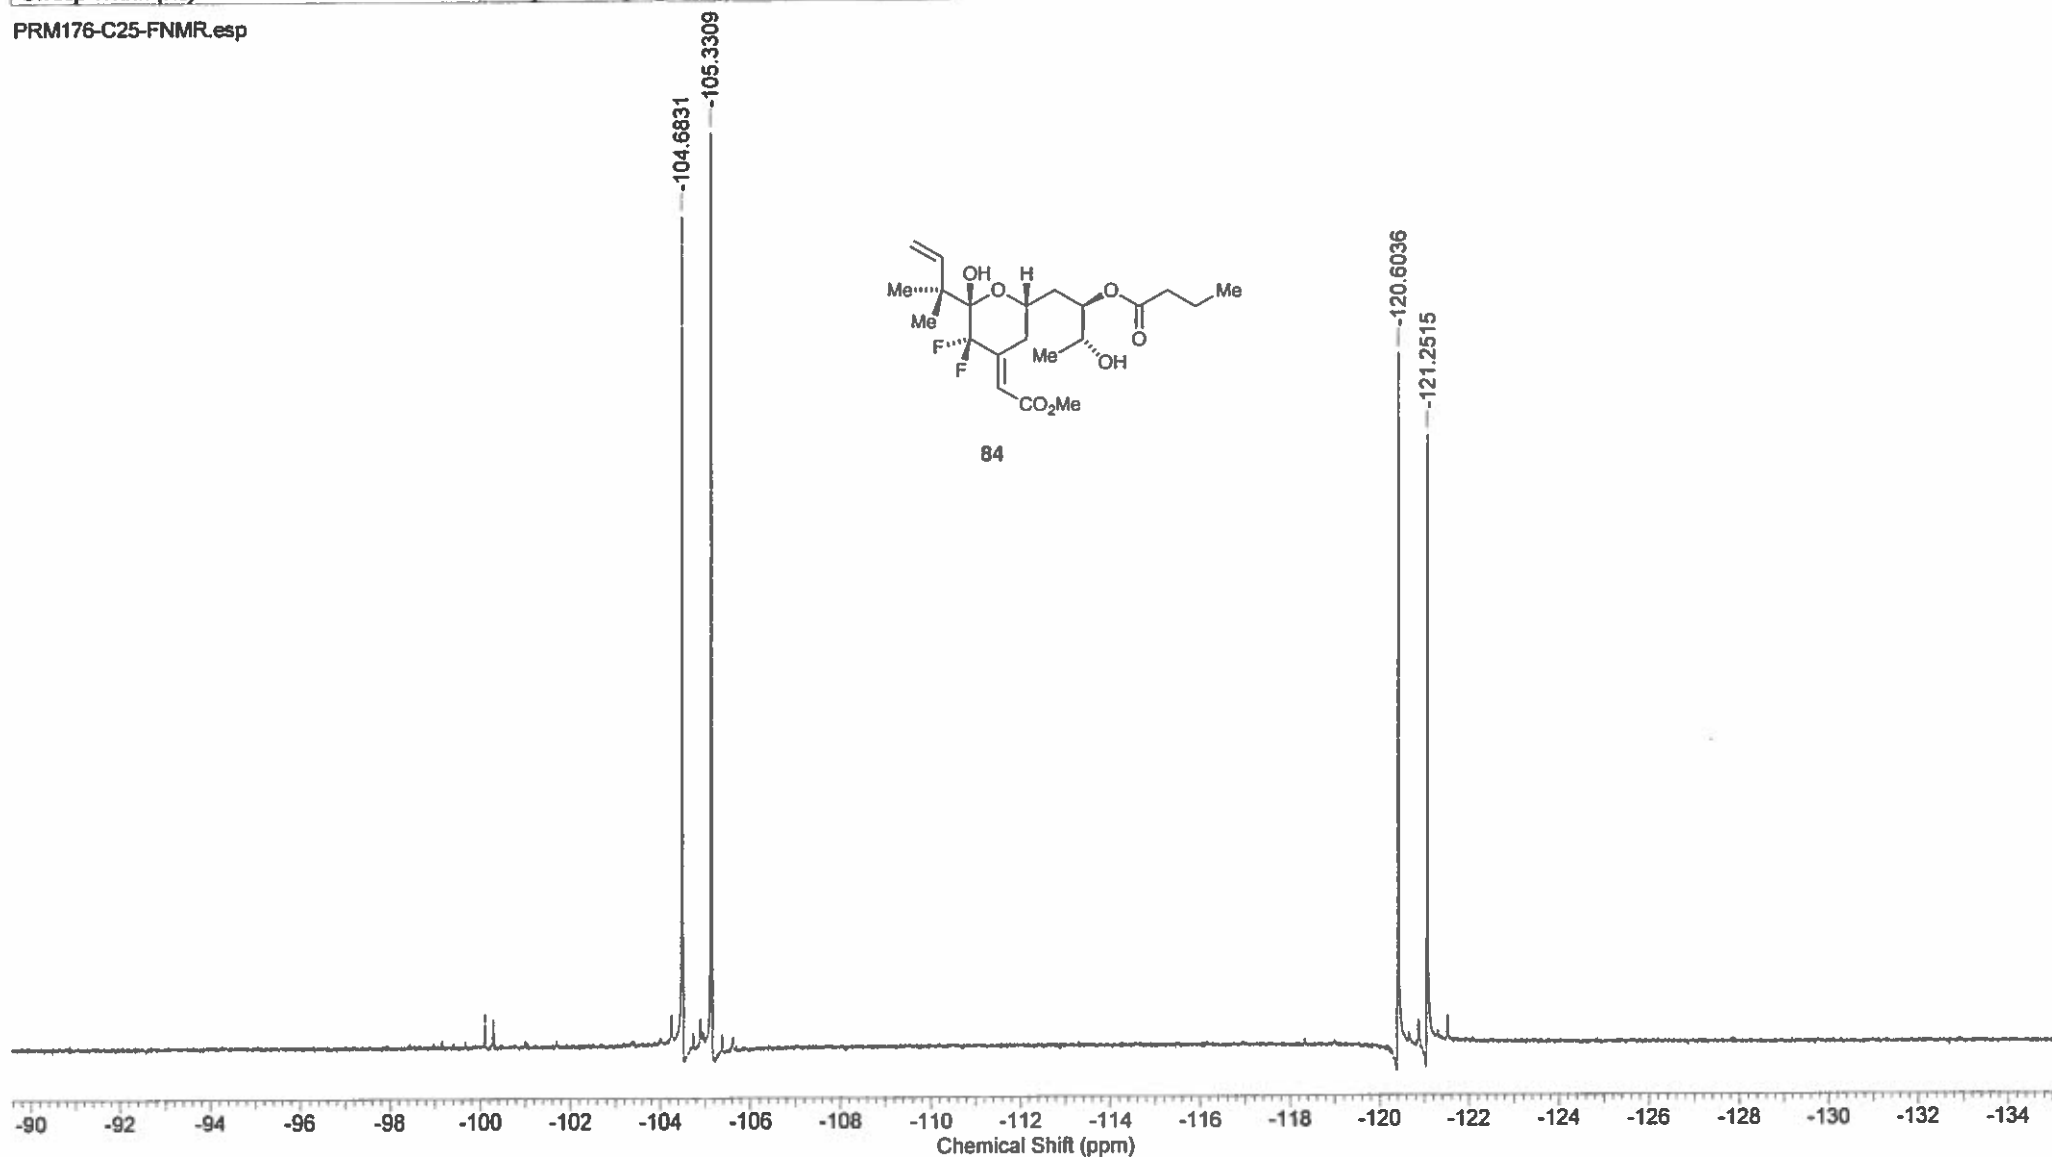

20160203-1417-51490-0-12  
Research Group Thomas  
Sample Reference EJT-SH037apolar  
mPROTON CDCI3 {E:\nmrdata\Thomas\_} mbdxksh3 39

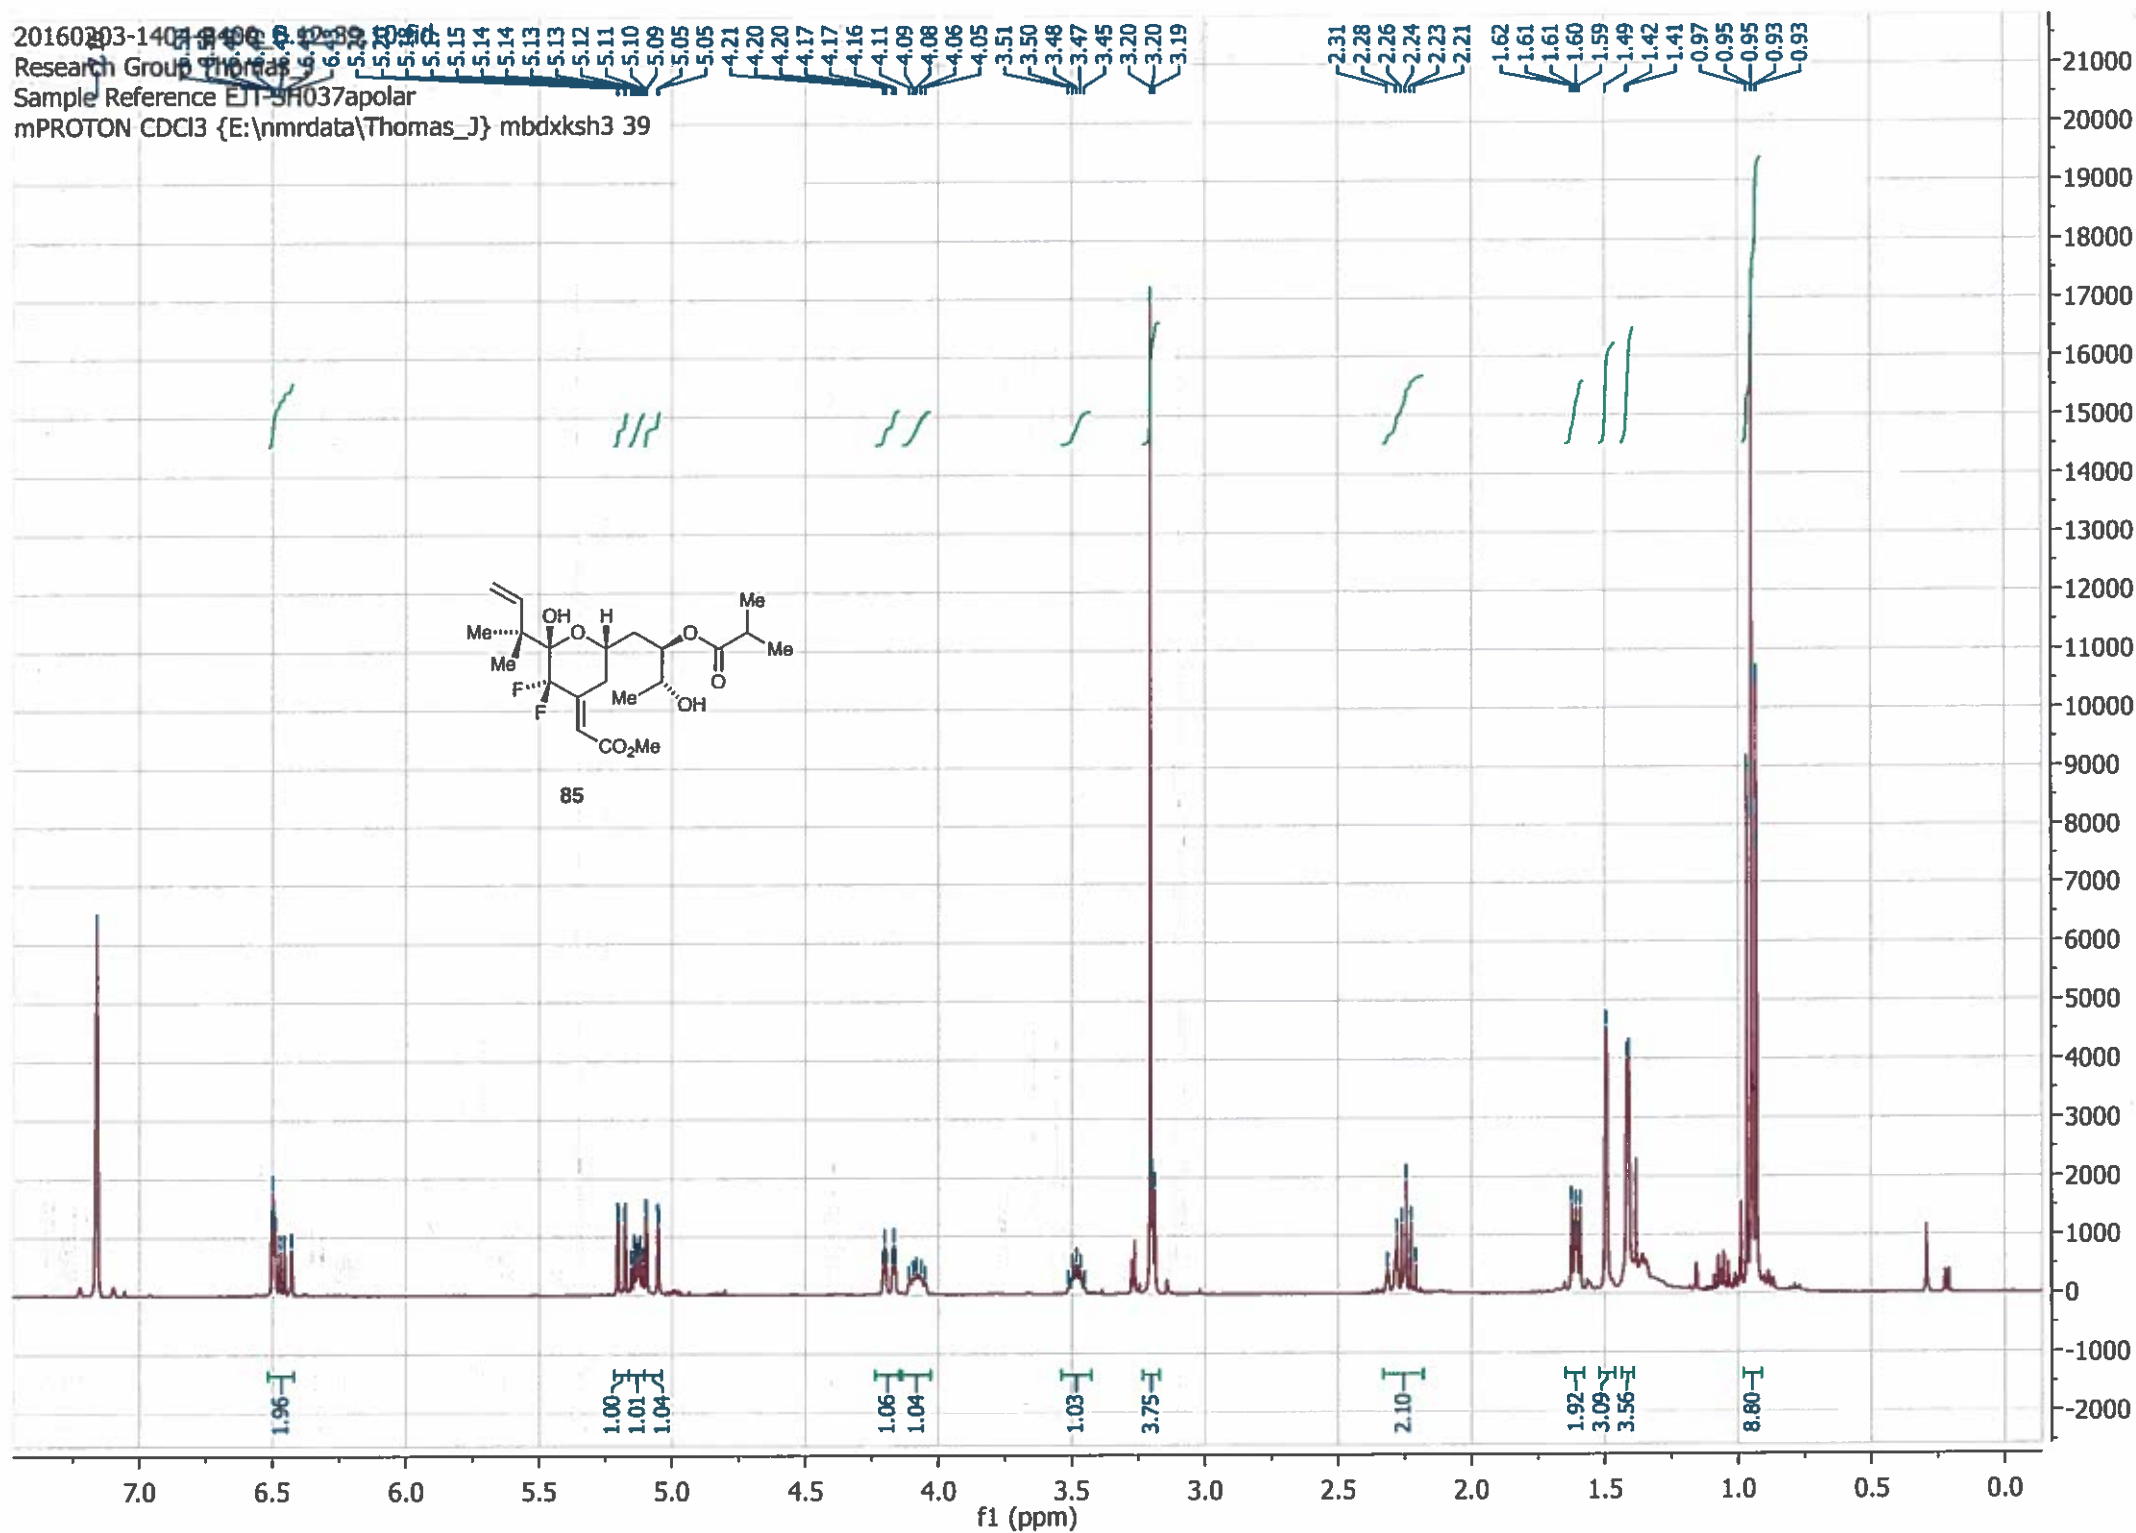

20160203-1735-B400\_B.12-241101.fid  
Research Group: Thomas\_J  
Sample Reference: ETT-SH037.ap01.ap01  
mCARBONnight CDCl3 {E:\nmrdata\Thomas\_J} mbooksh3 24

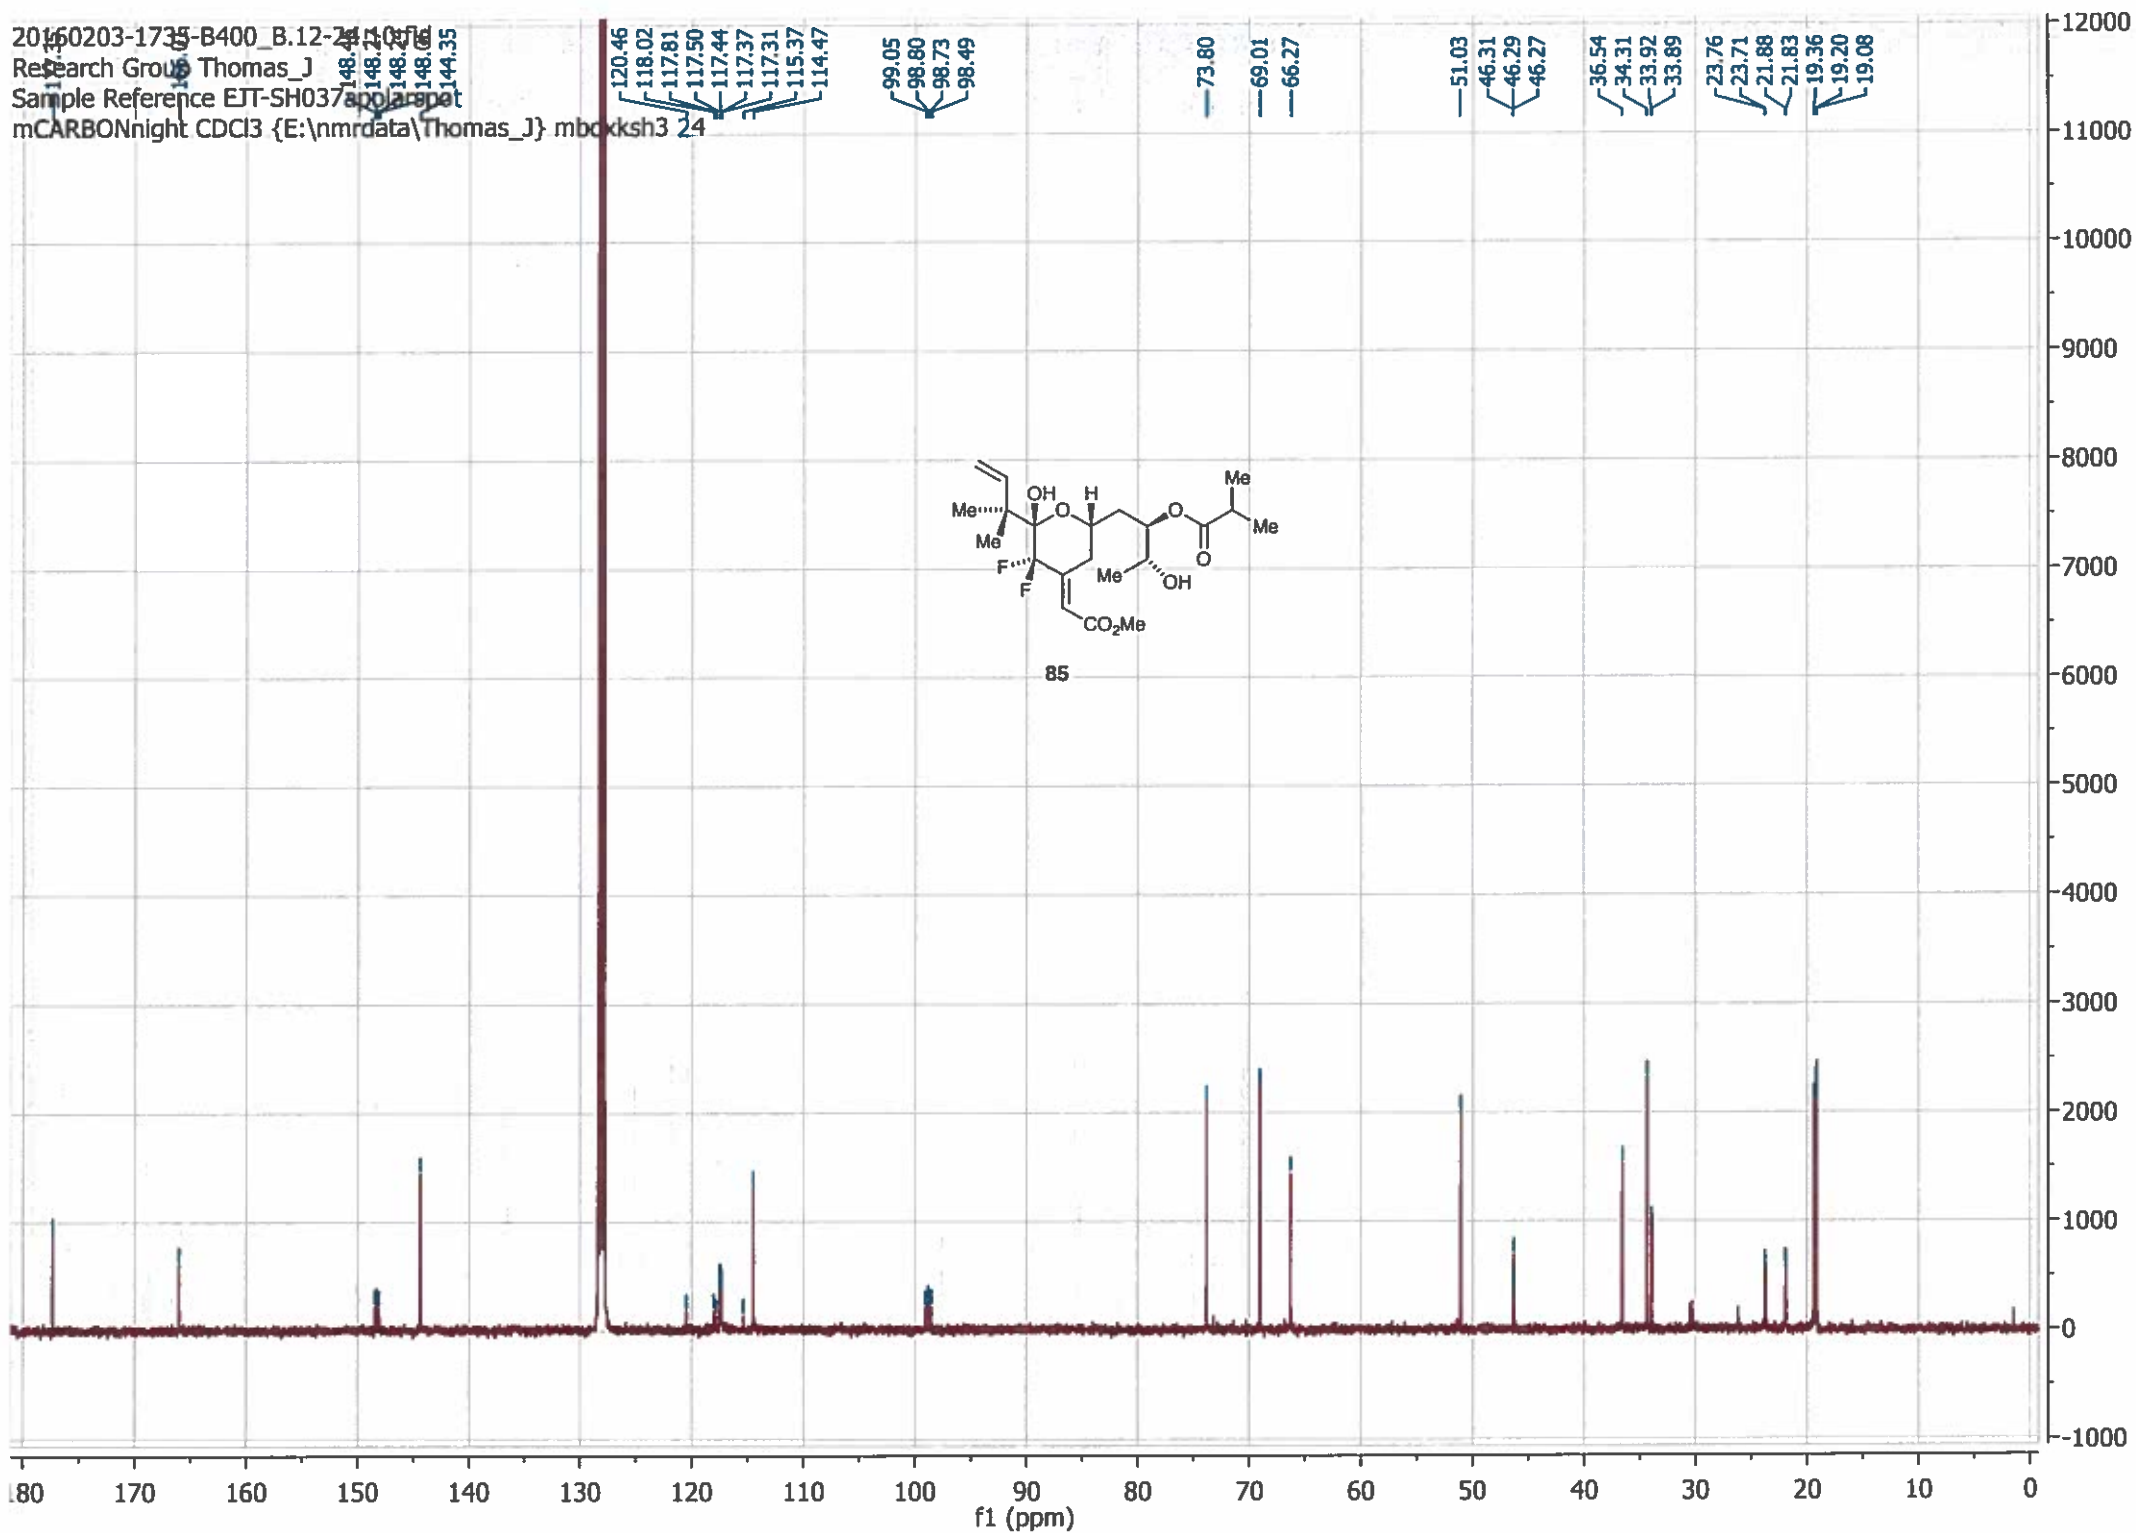

20160203-1735-B400\_B.12-24.11.fid  
Research Group Thomas\_J  
Sample Reference EJT-SH037apolarspot  
mF19 CDCl3 {E:\nmrdata\Thomas\_J} mbdxksh3 24

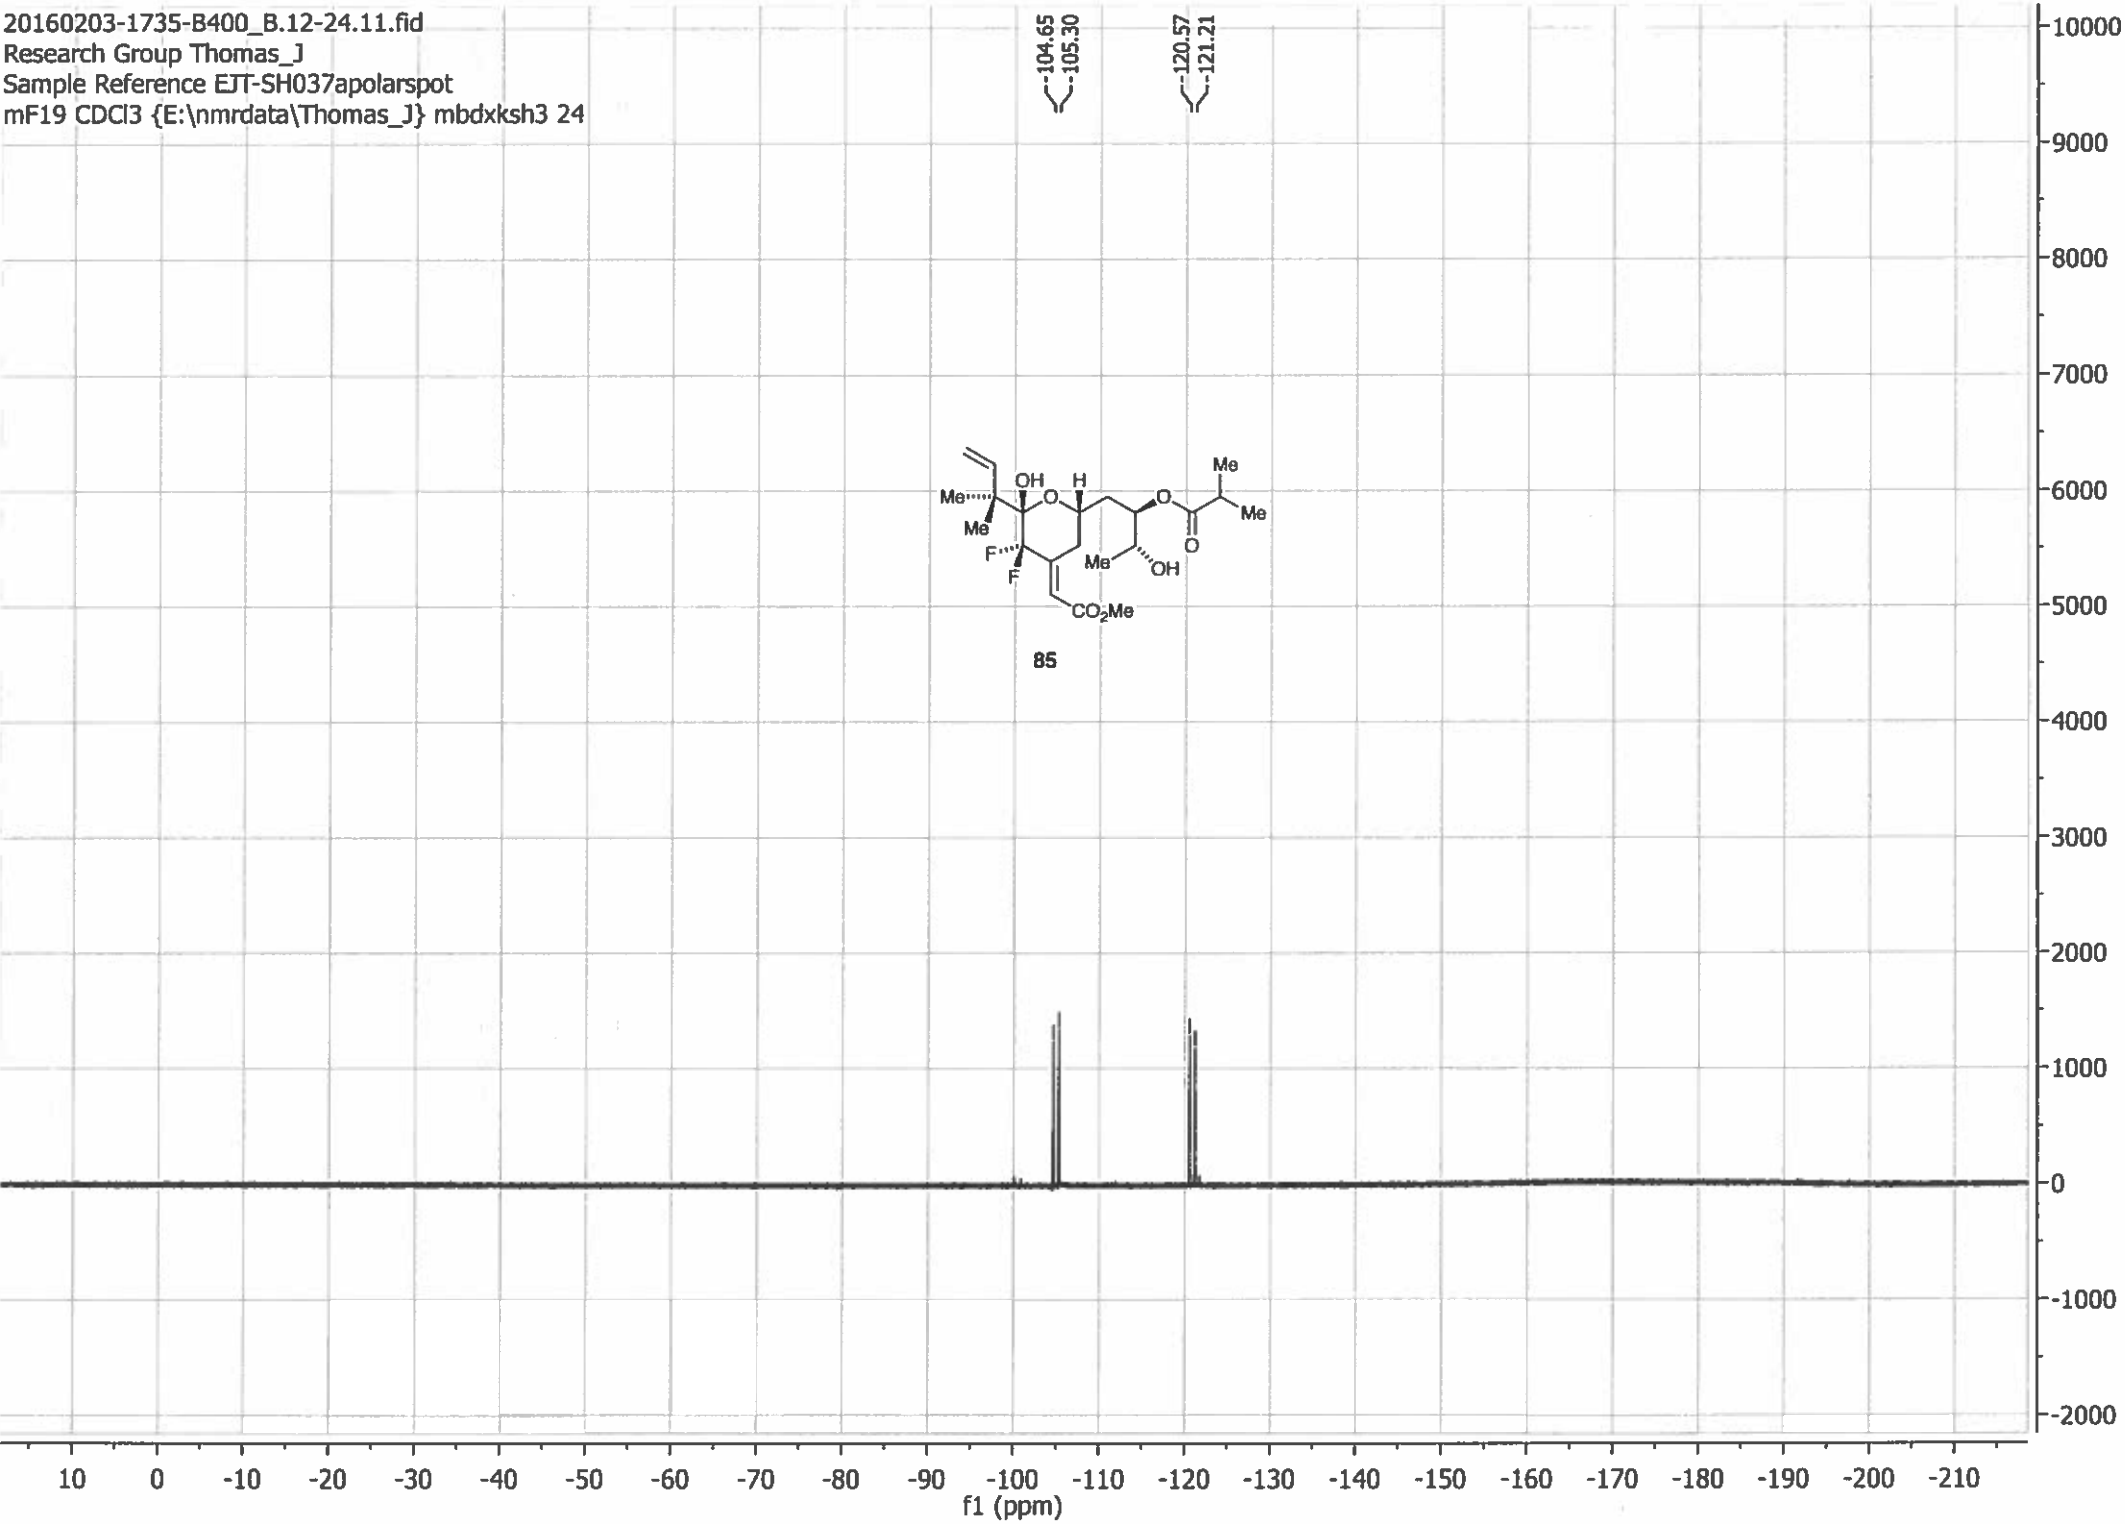

This report was created by ACD/NMR Processor Academic Edition. For more information go to [www.acdlabs.com/nmrproc/](http://www.acdlabs.com/nmrproc/)

|                        |                                                                                                          |                        |                                                                       |                      |           |
|------------------------|----------------------------------------------------------------------------------------------------------|------------------------|-----------------------------------------------------------------------|----------------------|-----------|
| Acquisition Time (sec) | 4.0894                                                                                                   | Comment                | EJT-PRM176 f6-17 6mg mPROTON A C6D6 {e:\bruk400cdata\2015\Feb} ejt 53 |                      |           |
| Date                   | 04 Mar 2015 10:14:24                                                                                     | Date Stamp             | 04 Mar 2015 10:14:24                                                  |                      |           |
| File Name              | \\ss7a.ds.man.ac.uk\vol5\vol3\users\snmrdata\bruk400cdata\2015\Feb\data\ejt\nmr\2015-03-04-ejt-53\10\fid |                        |                                                                       | Frequency (MHz)      | 400.07    |
| Nucleus                | <sup>1</sup> H                                                                                           | Number of Transients   | 4                                                                     | Origin               | spect     |
| Owner                  | nmrsu                                                                                                    | Points Count           | 32768                                                                 | Pulse Sequence       | zg30      |
| SW(cyclical) (Hz)      | 8012.82                                                                                                  | Solvent                | BENZENE-d6                                                            | Receiver Gain        | 161.00    |
| Sweep Width (Hz)       | 8012.58                                                                                                  | Temperature (degree C) | 15.338                                                                | Spectrum Offset (Hz) | 1903.3687 |
|                        |                                                                                                          |                        |                                                                       | Spectrum Type        | STANDARD  |

2015-03-04-ejt-53.010.esp

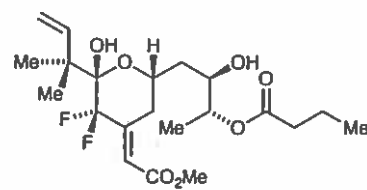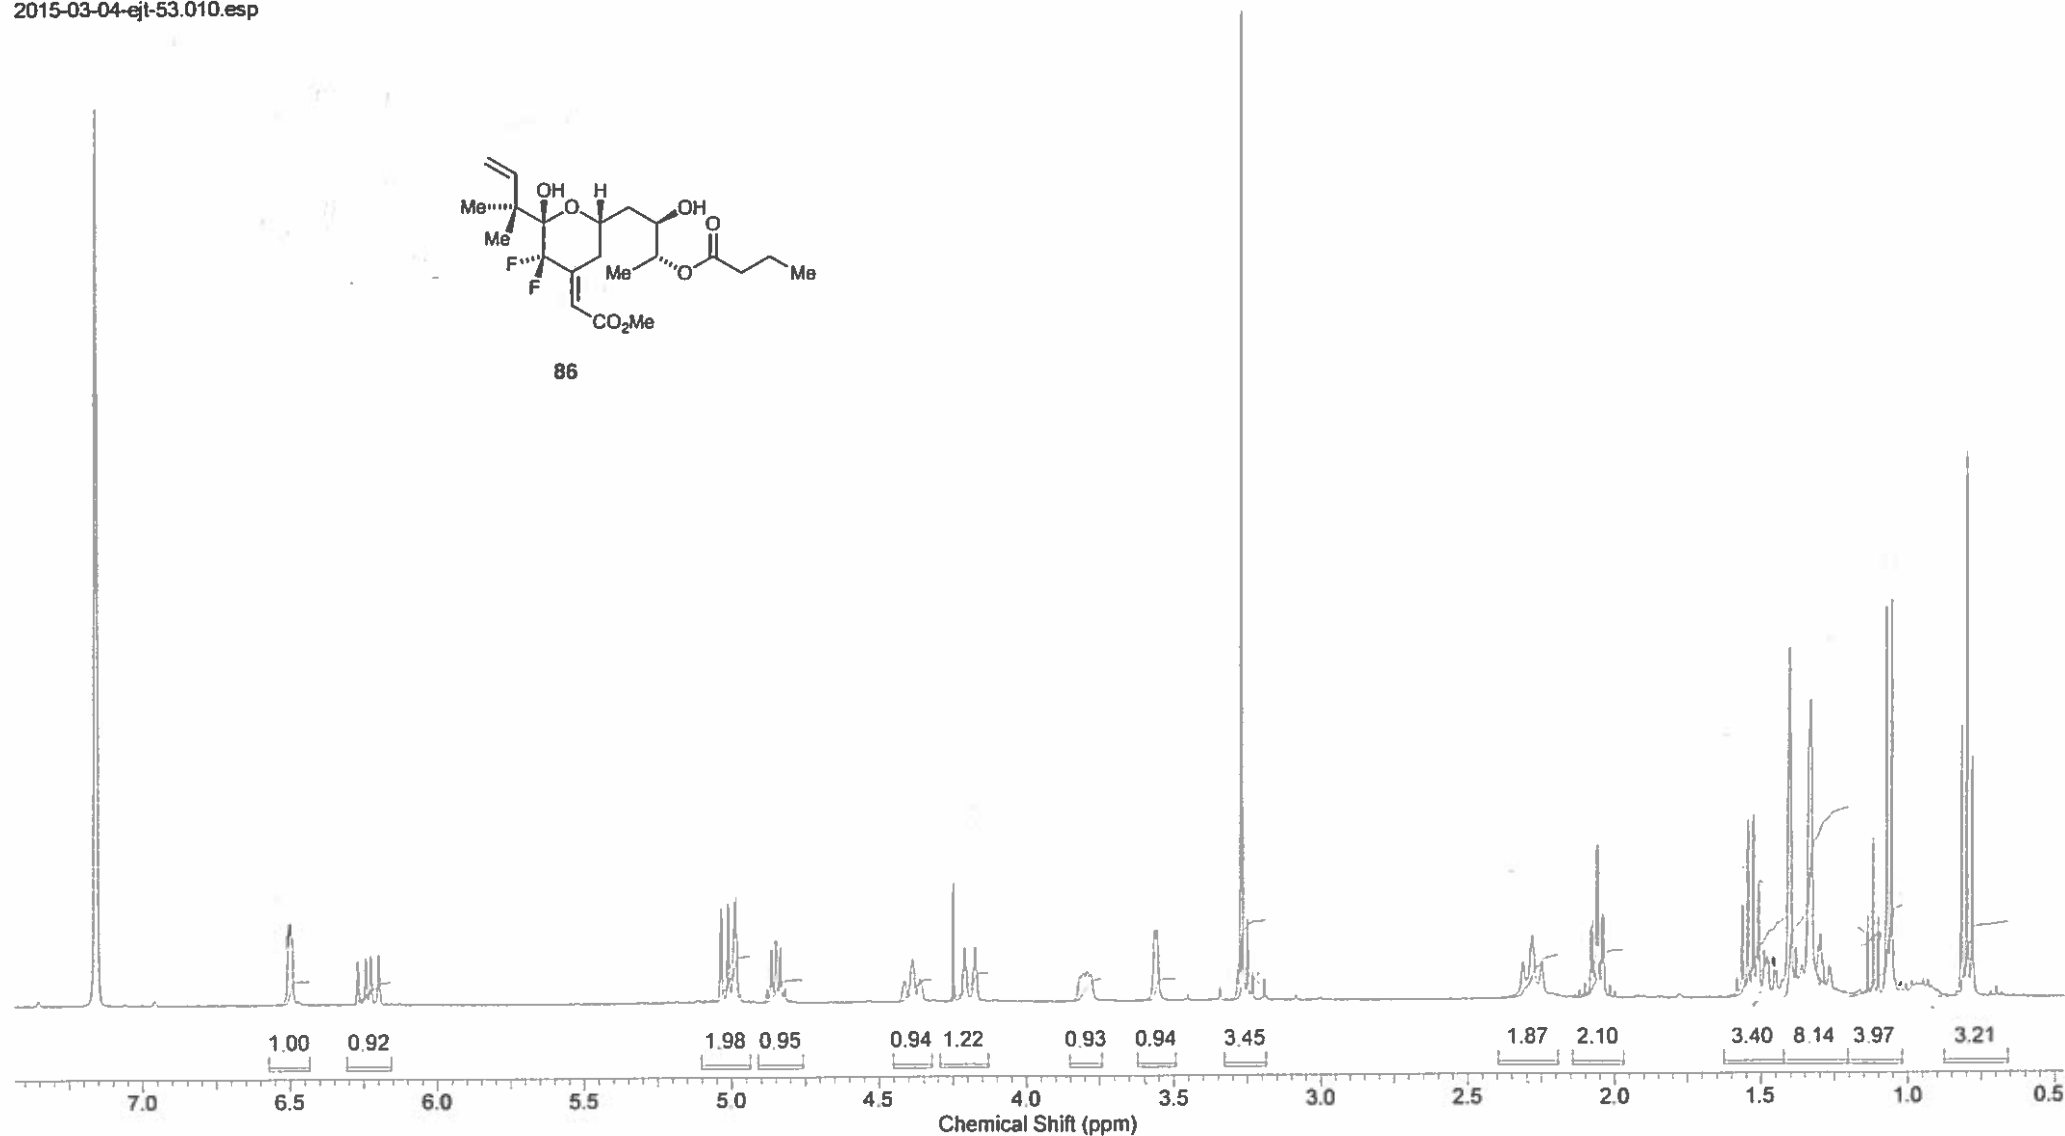



This report was created by ACD/NMR Processor Academic Edition. For more information go to [www.acdlabs.com/nmrproc/](http://www.acdlabs.com/nmrproc/)

This report was created by ACD/NMR Processor Academic Edition. For more information go to [www.acdlabs.com/nmr/proc/](http://www.acdlabs.com/nmr/proc/)

|                        |                                                                                                              |                        |                                                                                    |                      |            |                       |        |
|------------------------|--------------------------------------------------------------------------------------------------------------|------------------------|------------------------------------------------------------------------------------|----------------------|------------|-----------------------|--------|
| Acquisition Time (sec) | 1.1010                                                                                                       | Comment                | 0315 159 Mears P. EJ-PRM176 "C26" mCARBON C6D6 (E:\bruk500cdata\2015\Mar) staff 55 |                      |            |                       |        |
| Date                   | 21 Mar 2015 19:39:44                                                                                         | Date Stamp             | 21 Mar 2015 19:39:44                                                               |                      |            |                       |        |
| File Name              | \\ss7a.ds.man.ac.uk\vol5\vol3\users\snmrdata\bruk500cdata\2015\Mar\data\staff\nmr\2015-03-20-staff-55\11\vid |                        |                                                                                    |                      |            |                       |        |
| Nucleus                | 13C                                                                                                          | Number of Transients   | 10240                                                                              | Origin               | spect      | Frequency (MHz)       | 125.77 |
| Owner                  | nmrsu                                                                                                        | Points Count           | 32768                                                                              | Pulse Sequence       | zgpg30     | Original Points Count | 32768  |
| SW(cyclical) (Hz)      | 29761.90                                                                                                     | Solvent                | BENZENE-d6                                                                         | Spectrum Offset (Hz) | 12661.6182 | Receiver Gain         | 184.40 |
| Sweep Width (Hz)       | 29761.00                                                                                                     | Temperature (degree C) | 22.158                                                                             | Spectrum Type        | STANDARD   |                       |        |

PRM176-C26-CNMR.esp

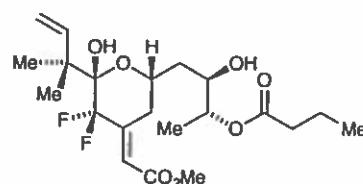

86

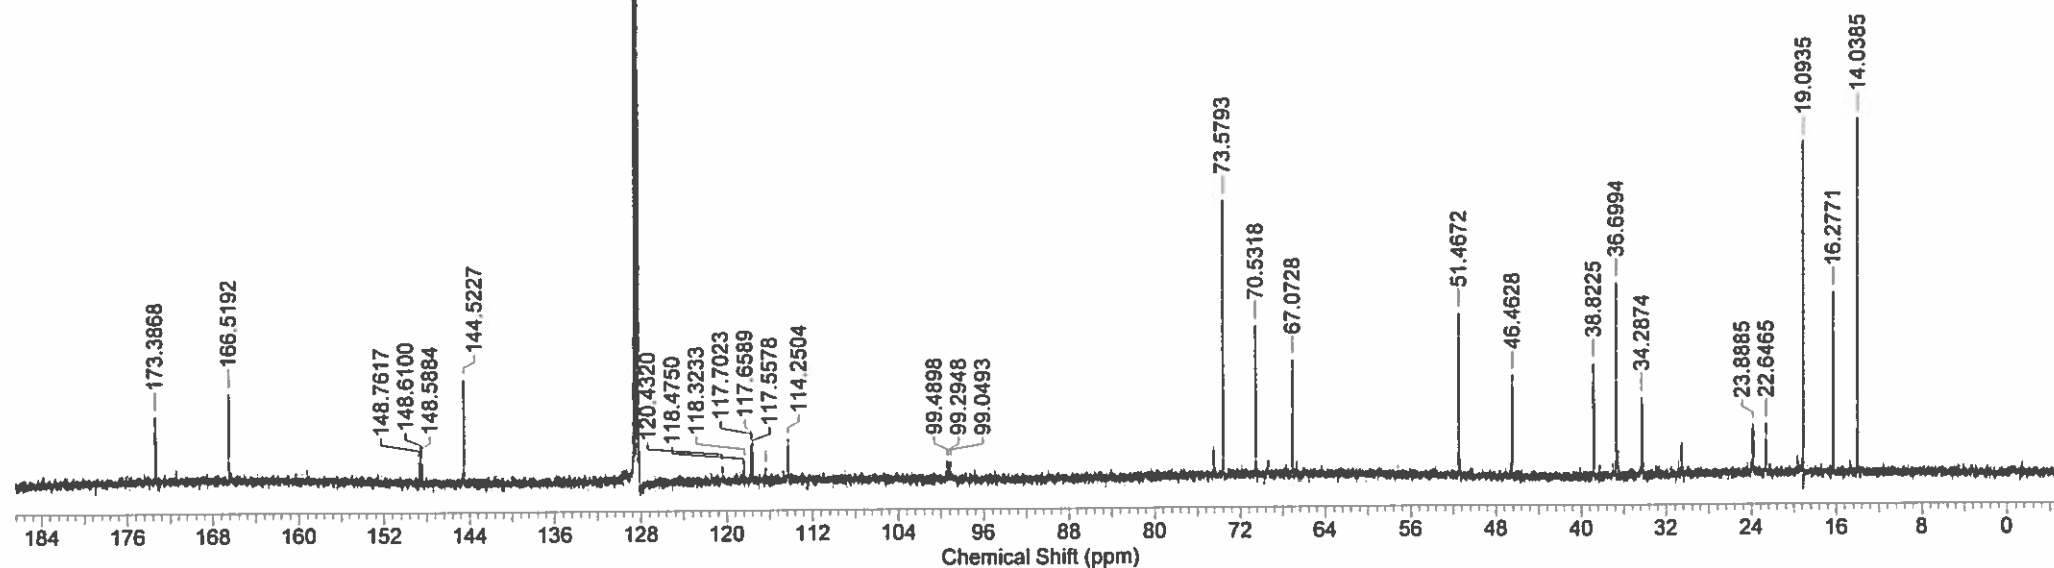

This report was created by ACD/NMR Processor Academic Edition. For more information go to [www.acdlabs.com/nmrproc/](http://www.acdlabs.com/nmrproc/)

|                        |                                                                                                          |                        |                                                                            |                      |             |
|------------------------|----------------------------------------------------------------------------------------------------------|------------------------|----------------------------------------------------------------------------|----------------------|-------------|
| Acquisition Time (sec) | 0.7340                                                                                                   | Comment                | EJT-PRM176 f6-17 6mg mF19 cryo zgbs C6D6 (e:\bruk400cdata\2015\Feb) ejt 53 |                      |             |
| Date                   | 04 Mar 2015 10:16:32                                                                                     | Date Stamp             | 04 Mar 2015 10:16:32                                                       |                      |             |
| File Name              | \\ss7a.ds.man.ac.uk\vol5\vol3\users\snmrdata\bruk400cdata\2015\Feb\data\ejt\nmr\2015-03-04-ejt-53\11\fid |                        |                                                                            | Frequency (MHz)      | 376.44      |
| Nucleus                | 19F                                                                                                      | Number of Transients   | 16                                                                         | Origin               | spect       |
| Owner                  | nmrsu                                                                                                    | Points Count           | 65536                                                                      | Pulse Sequence       | zgbs        |
| SW(cyclical) (Hz)      | 89285.71                                                                                                 | Solvent                | BENZENE-d6                                                                 | Receiver Gain        | 20.20       |
| Sweep Width (Hz)       | 89284.35                                                                                                 | Temperature (degree C) | 15.336                                                                     | Spectrum Offset (Hz) | -37644.8594 |
|                        |                                                                                                          |                        |                                                                            | Spectrum Type        | STANDARD    |

PRM176-C26-FNMR.esp

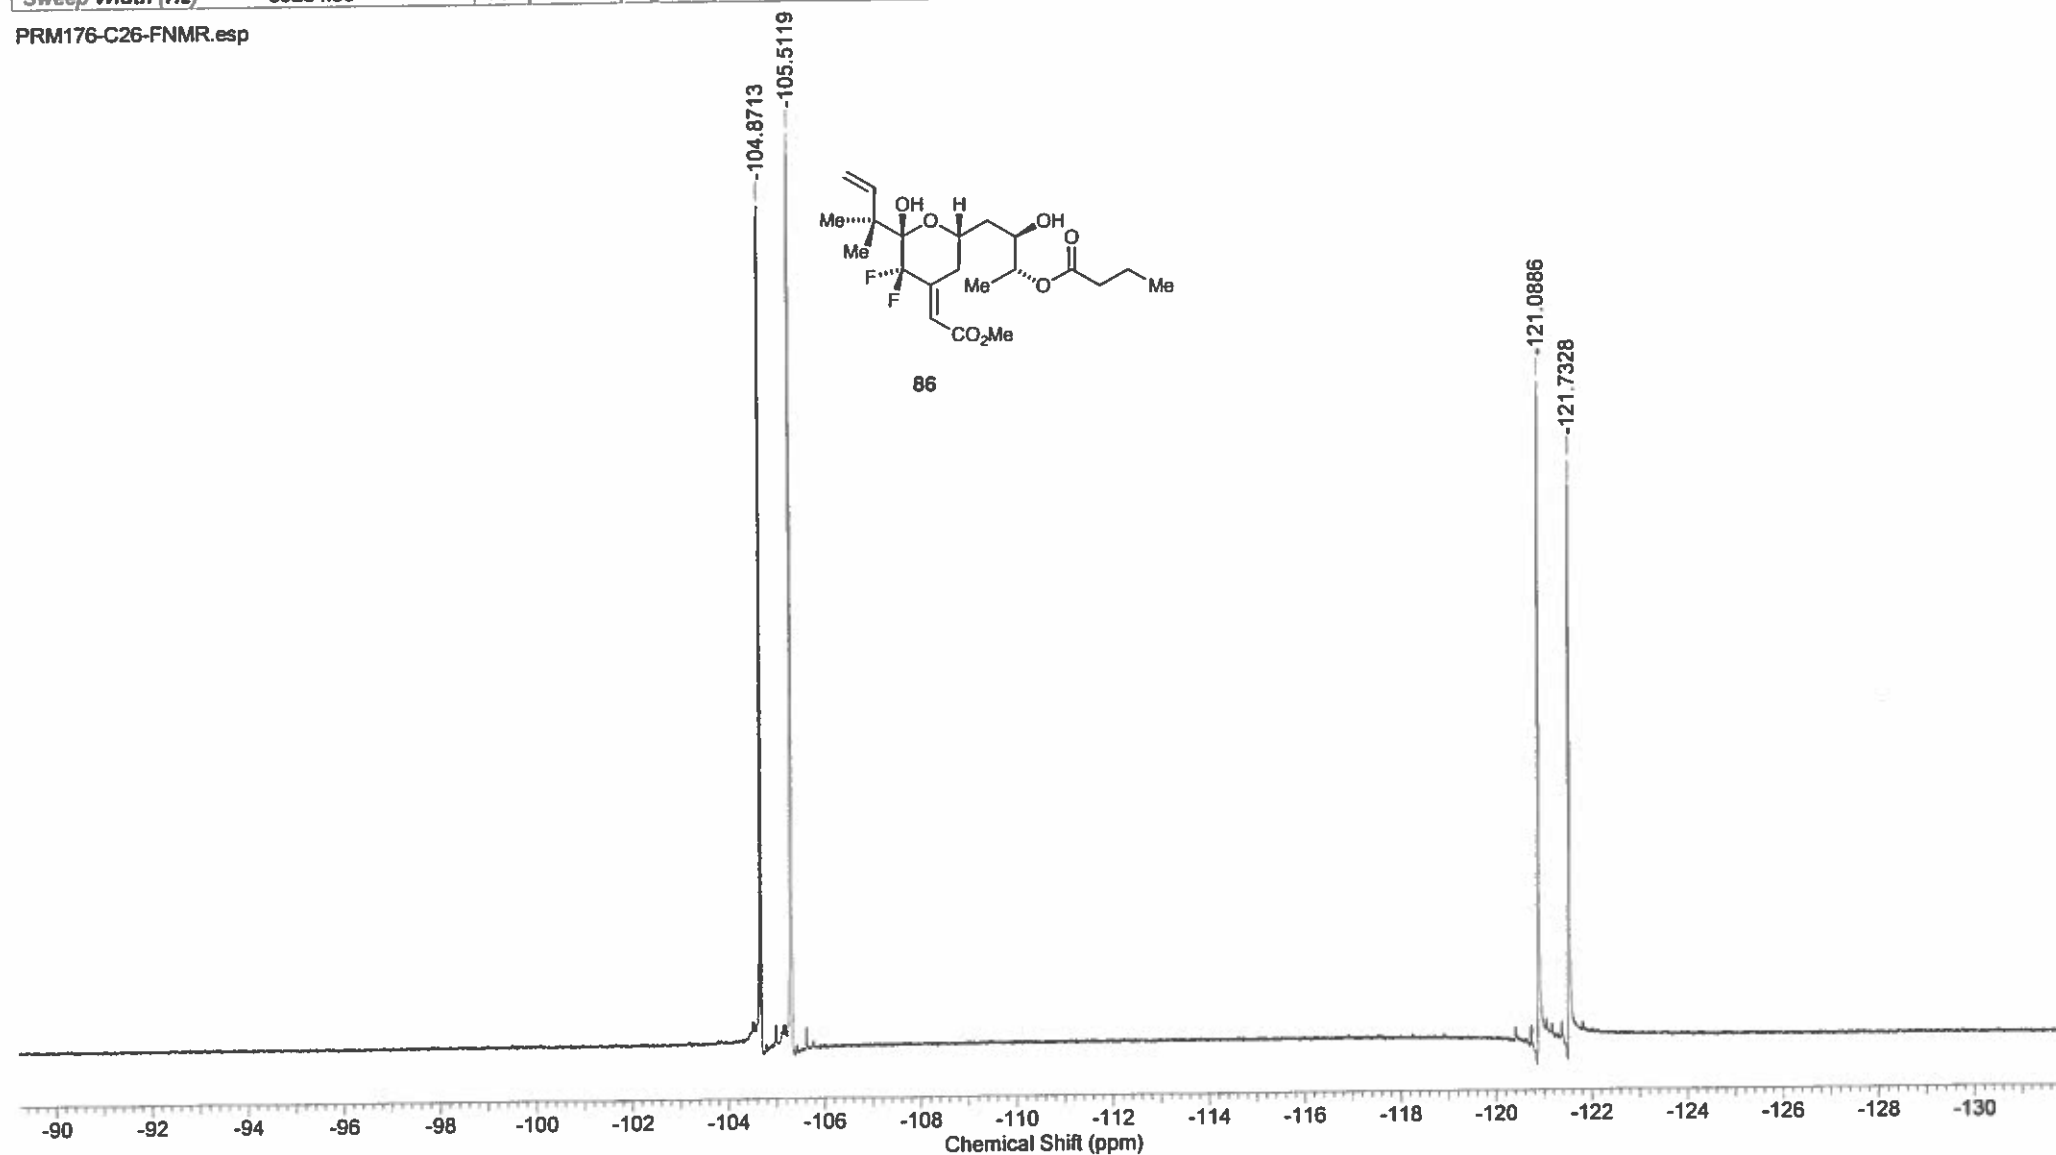

20160203-1404-4406-6-12-10.fid  
 Research Group Thomas\_J  
 Sample Reference EJT-SH03/polar  
 mPROTON CDCl3 {E:\nmrdata\Thomas\_J} mbdxksh3 40

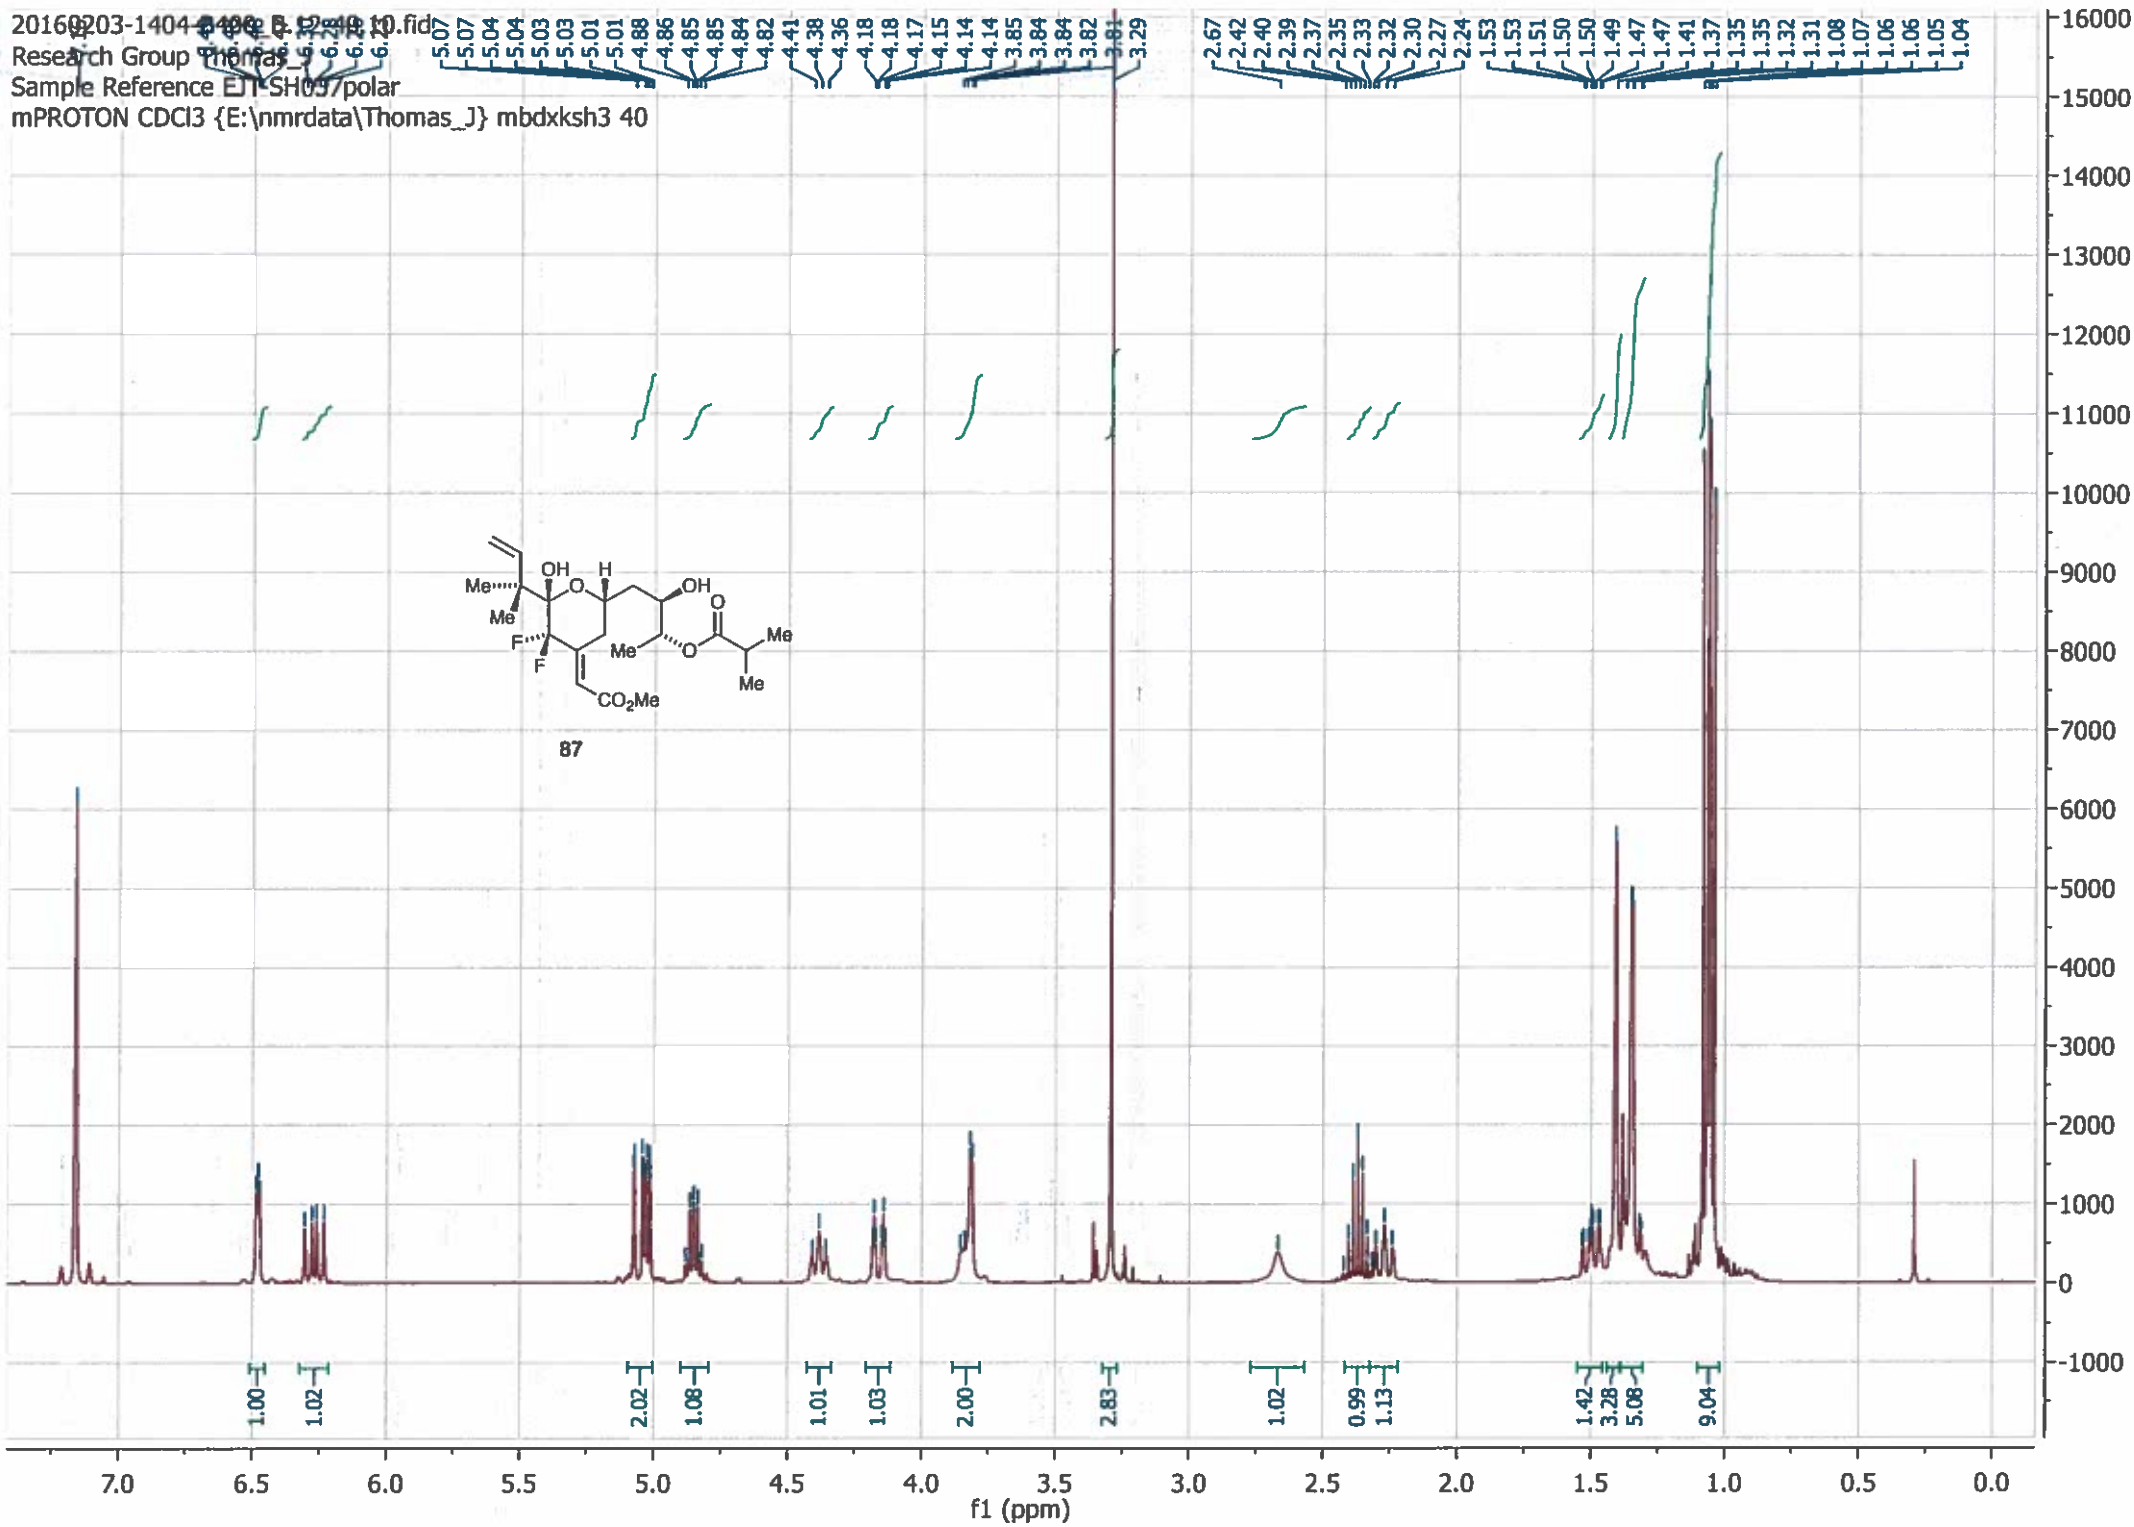

20160203-1736-B400\_B.12-25.10.fid  
 Research Group Thomas\_J  
 Sample Reference EJT-SH039polarspot  
 mCARBONnight CDCl3 {E:\nmrdata\Thomas\_J} mbdxksh3 25

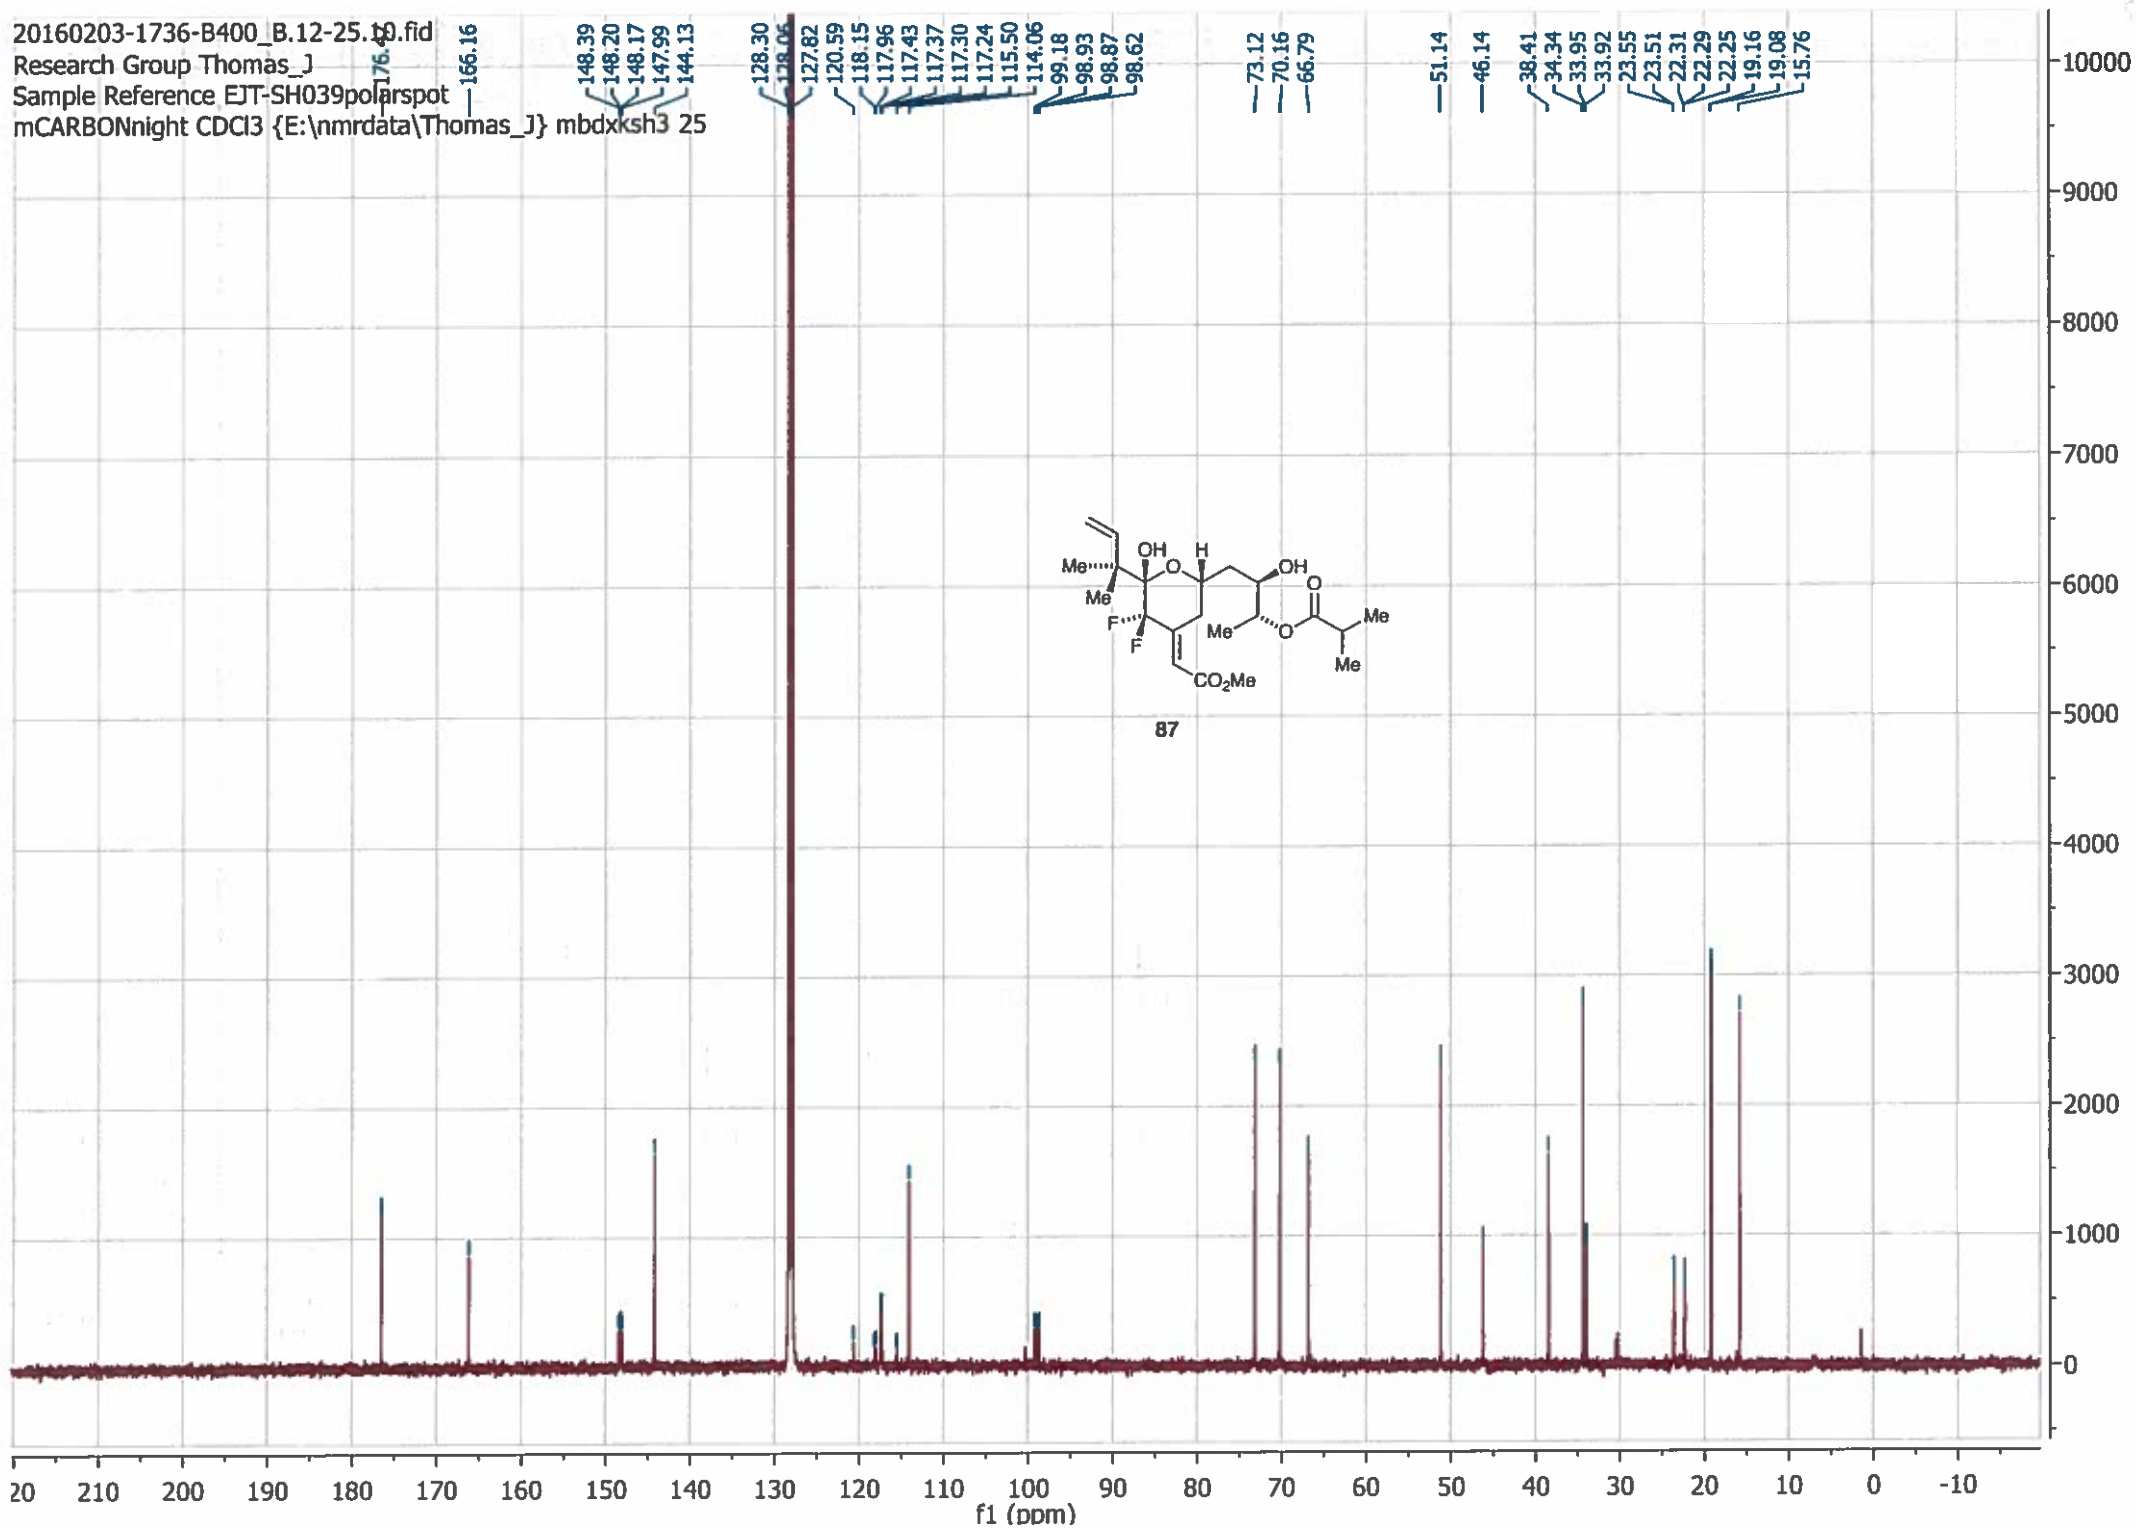

20160203-1736-B400\_B.12-25.11.fid  
Research Group Thomas\_J  
Sample Reference EJT-SH039polarspot  
mF19 CDCl3 {E:\nmrdata\Thomas\_J} mbdxksh3 25

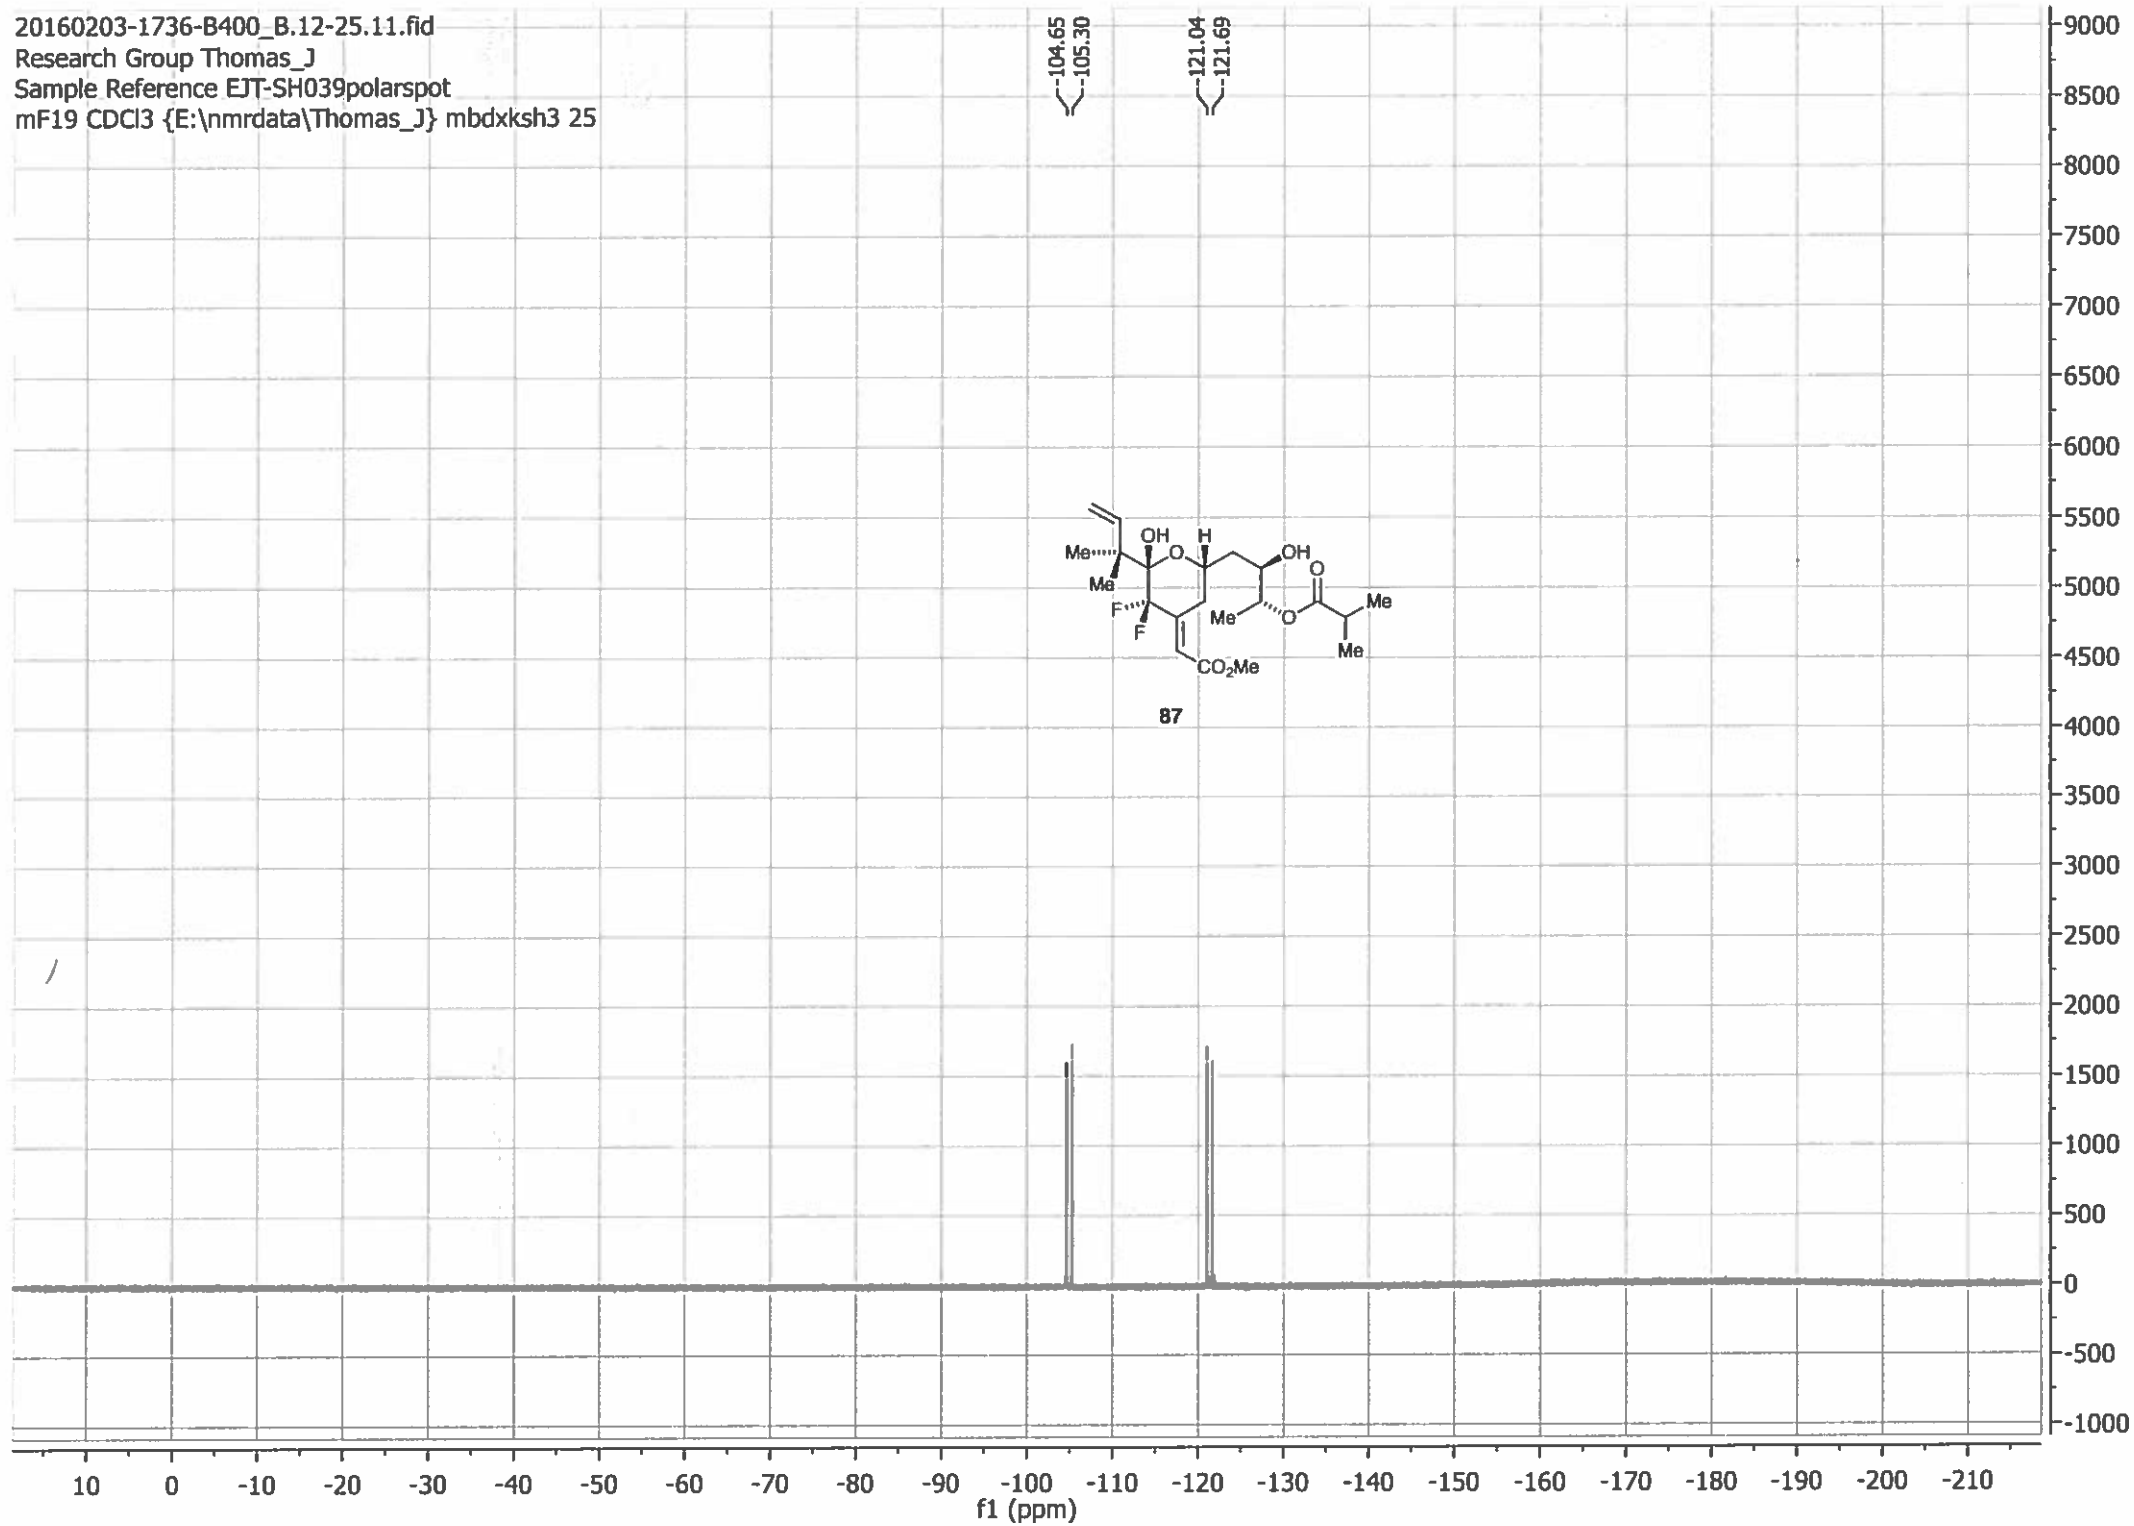

|                        |                                                                                                          |                        |                                                                        |                 |          |
|------------------------|----------------------------------------------------------------------------------------------------------|------------------------|------------------------------------------------------------------------|-----------------|----------|
| Acquisition Time (sec) | 3.9649                                                                                                   | Comment                | EJT-PRM184 f8-25 157mg mPROTON CDCI3 (e:\bruk400adata\2015\Jul) ejt 52 |                 |          |
| Date                   | 14 Jul 2015 19:25:04                                                                                     | Date Stamp             | 14 Jul 2015 19:25:04                                                   |                 |          |
| File Name              | \\ss7a.ds.man.ac.uk\vol5\vol3\users\snmrdata\bruk400adata\2015\Jul\data\ejt\nmr\2015-07-14-ejt-52\10\fid |                        |                                                                        | Frequency (MHz) | 400.13   |
| Nucleus                | <sup>1</sup> H                                                                                           | Number of Transients   | 16                                                                     | Origin          | AV400    |
| Owner                  | nmrsu                                                                                                    | Points Count           | 32768                                                                  | Pulse Sequence  | zg30b    |
| SW(cyclical) (Hz)      | 8264.46                                                                                                  | Solvent                | CHLOROFORM-d                                                           | Receiver Gain   | 36.00    |
| Sweep Width (Hz)       | 8264.21                                                                                                  | Temperature (degree C) | 21.300                                                                 | Spectrum Type   | STANDARD |

PRM184-aldehyde-HNMR.esp

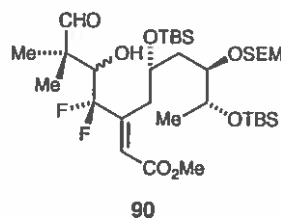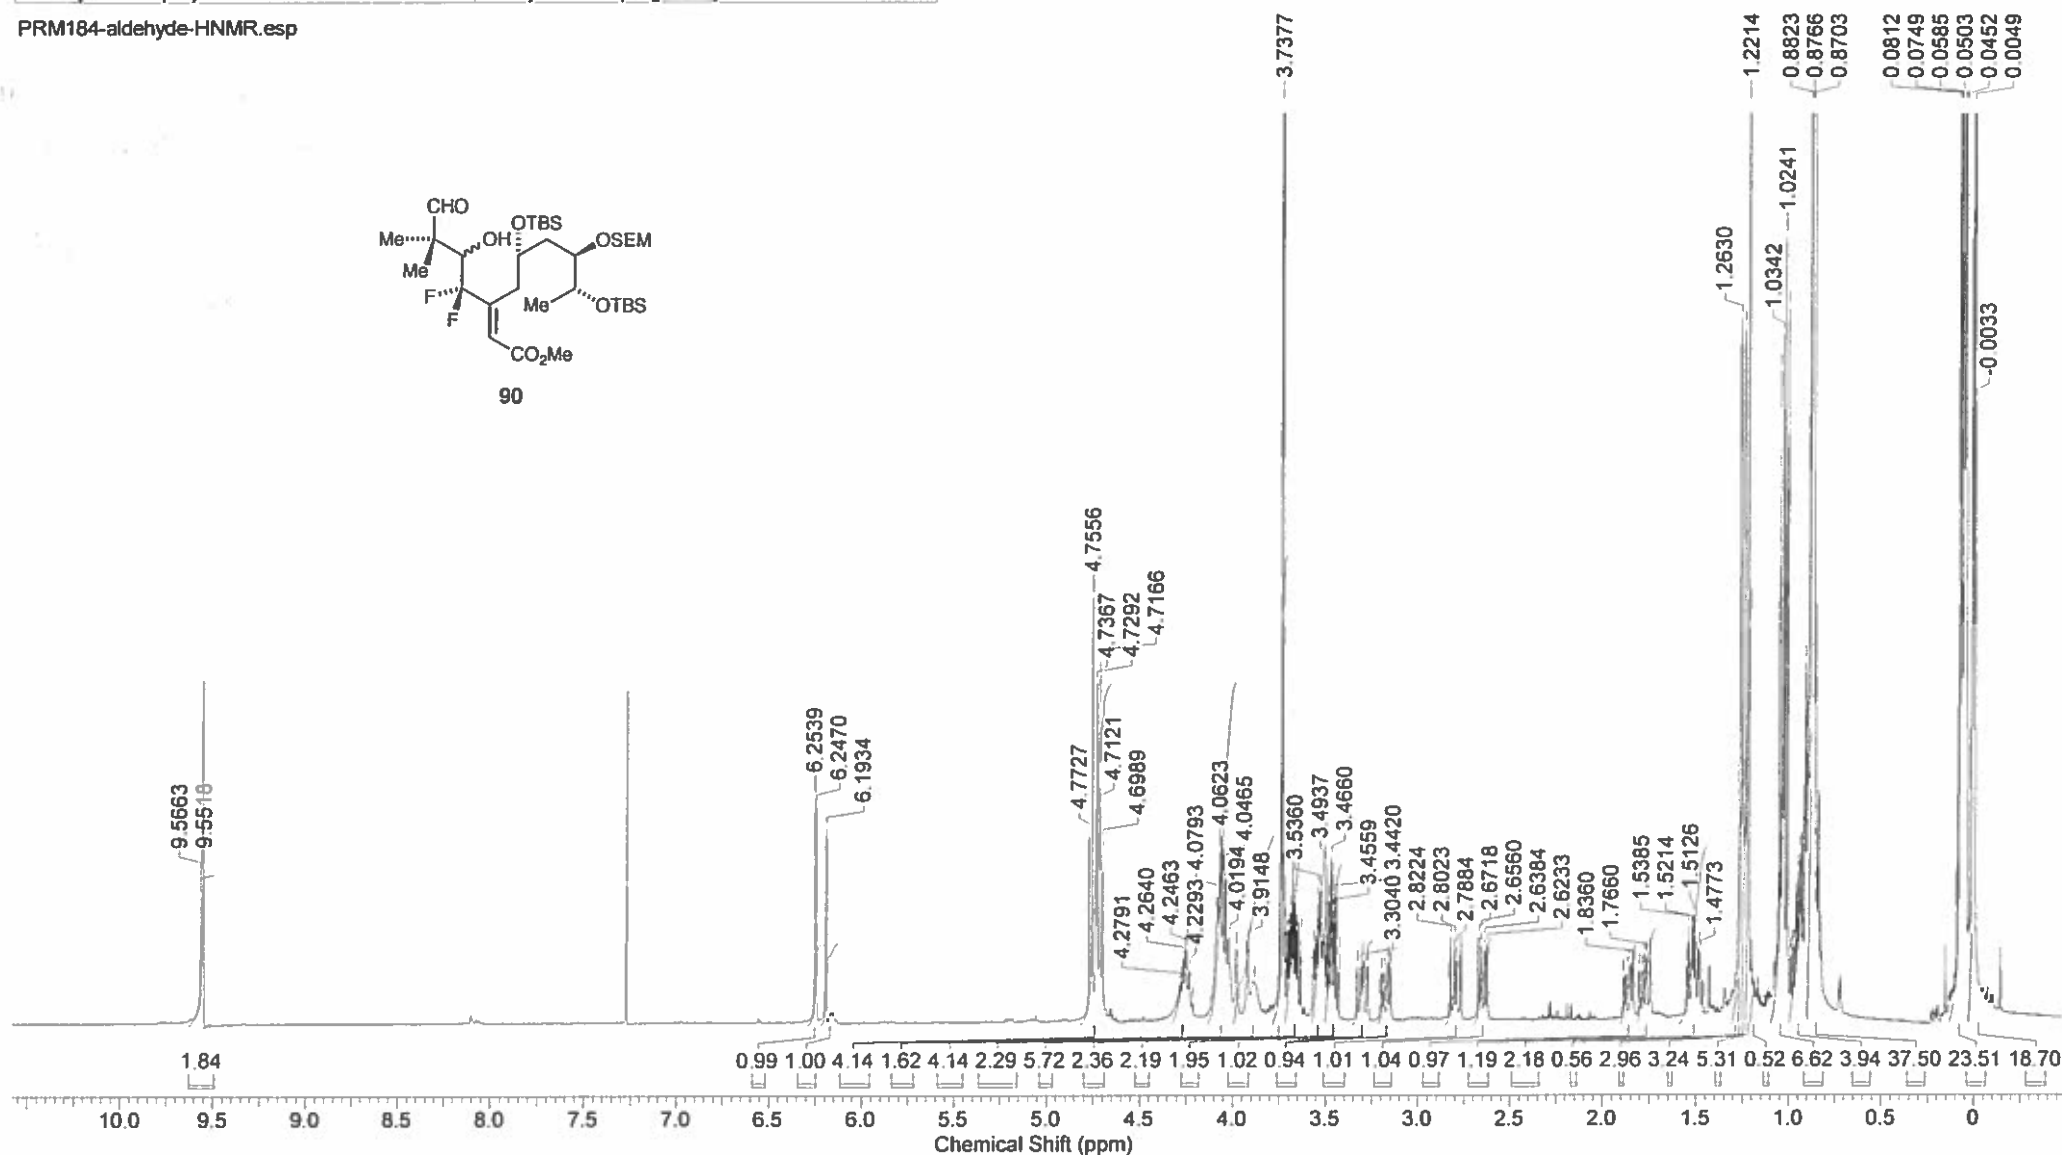

|                        |                                                                                                         |                        |                                                                            |                      |            |
|------------------------|---------------------------------------------------------------------------------------------------------|------------------------|----------------------------------------------------------------------------|----------------------|------------|
| Acquisition Time (sec) | 1.3566                                                                                                  | Comment                | EJT-PRM184 f8-25 157mg mCARBONnight CDC13 (e:\bruk400adata\2015Jul) ejt 52 |                      |            |
| Date                   | 14 Jul 2015 22:30:40                                                                                    | Date Stamp             | 14 Jul 2015 22:30:40                                                       |                      |            |
| File Name              | \\ss7a.ds.man.ac.uk\vol5\vol3\users\snmrdata\bruk400adata\2015Jul\data\ejt\nmr\2015-07-14-ejt-52\13\fid | Frequency (MHz)        | 100.61                                                                     |                      |            |
| Nucleus                | <sup>13</sup> C                                                                                         | Number of Transients   | 3000                                                                       | Origin               | AV400      |
| Owner                  | nmrsu                                                                                                   | Points Count           | 32768                                                                      | Pulse Sequence       | zgpg30     |
| SW(cyclical) (Hz)      | 24154.59                                                                                                | Solvent                | CHLOROFORM-d                                                               | Spectrum Offset (Hz) | 10059.2100 |
| Sweep Width (Hz)       | 24153.85                                                                                                | Temperature (degree C) | 22.900                                                                     | Receiver Gain        | 512.00     |
|                        |                                                                                                         |                        |                                                                            | Spectrum Type        | STANDARD   |

PRM184-aldehyde-CNMR.esp

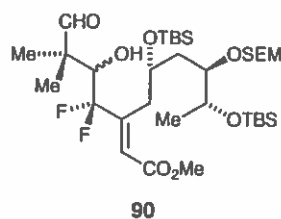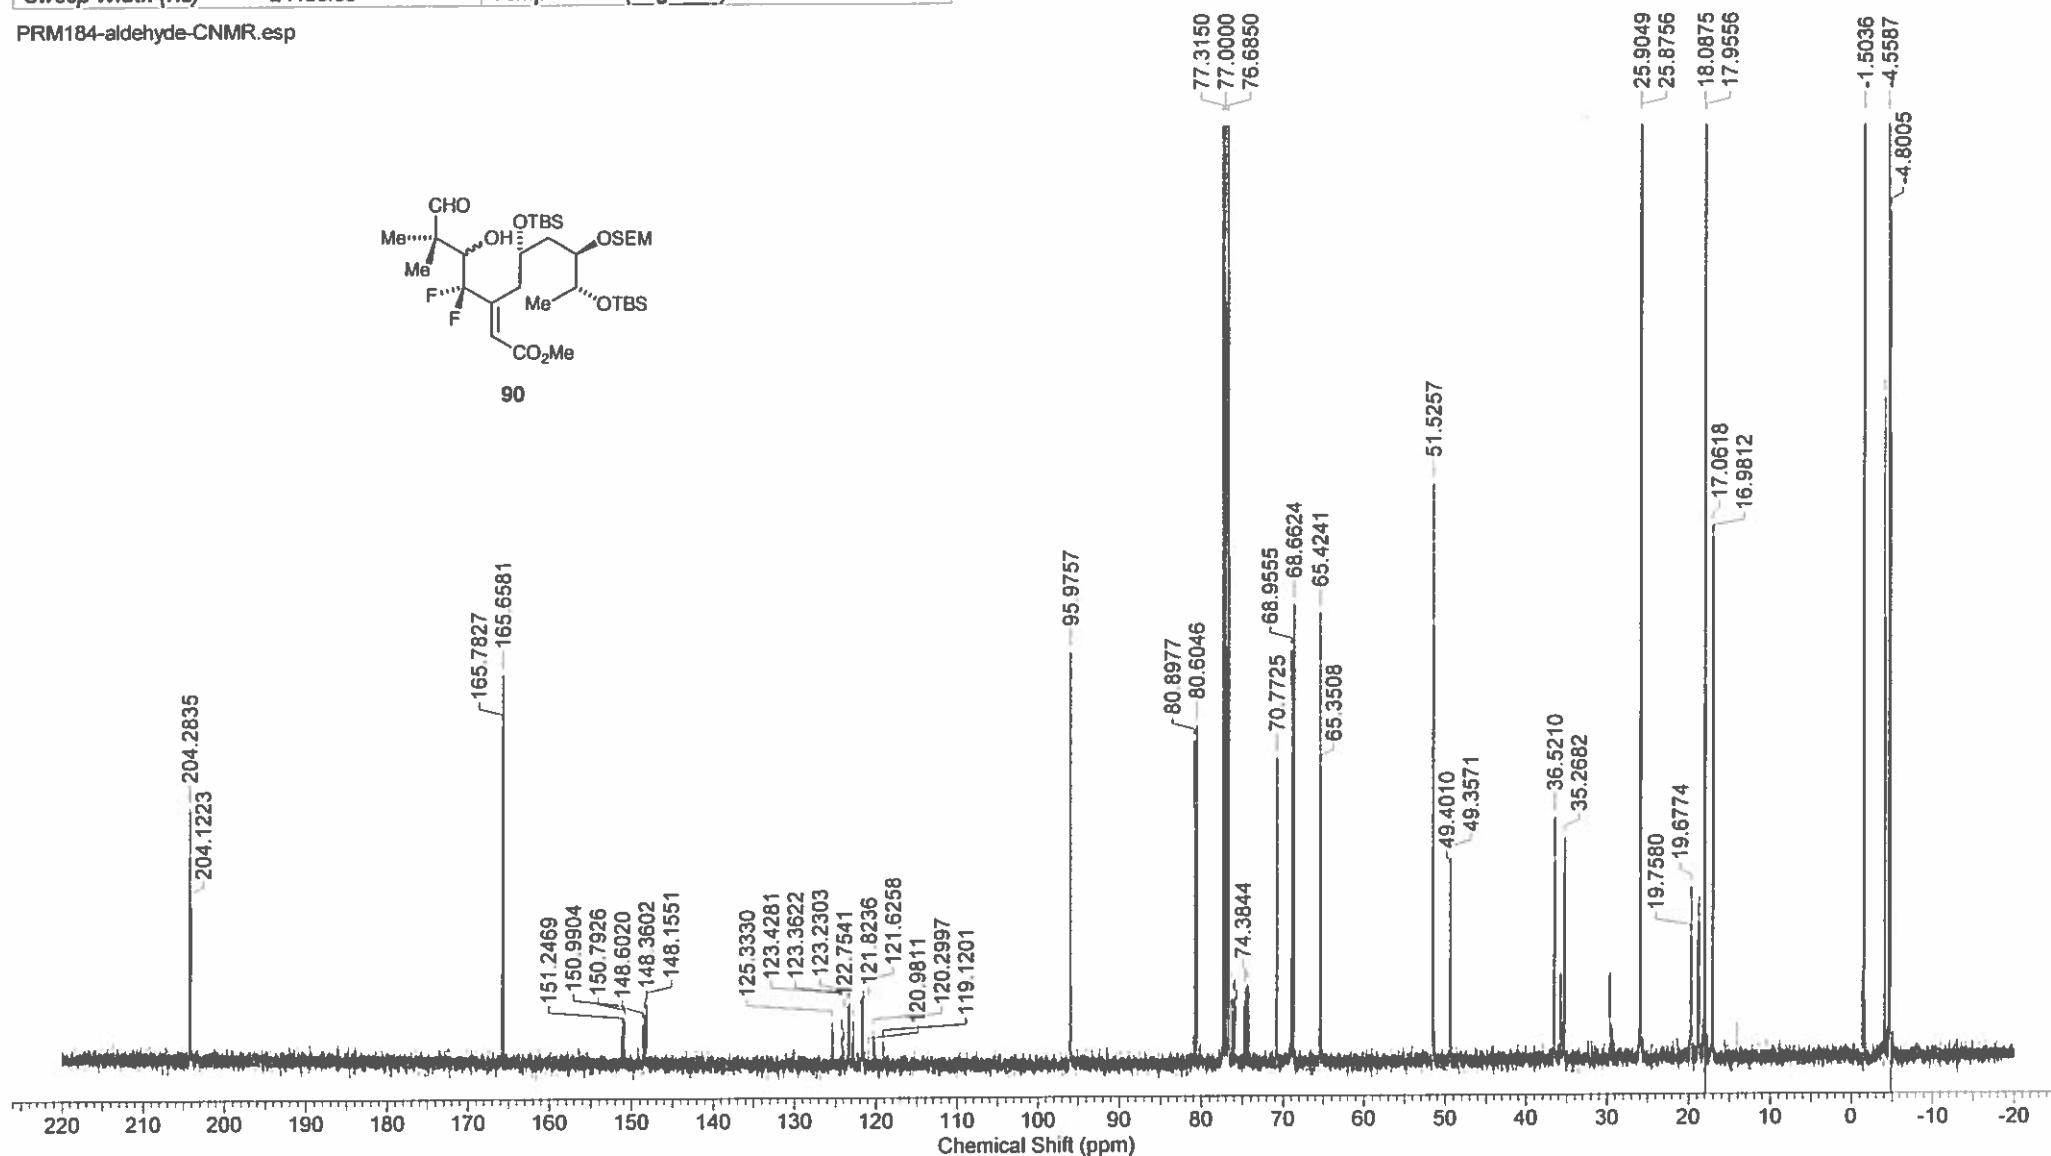

This report was created by ACD/NMR Processor Academic Edition. For more information go to [www.acdlabs.com/nmrproc/](http://www.acdlabs.com/nmrproc/)

|                        |                                                                                                         |                        |                                                                             |                      |            |
|------------------------|---------------------------------------------------------------------------------------------------------|------------------------|-----------------------------------------------------------------------------|----------------------|------------|
| Acquisition Time (sec) | 1.3566                                                                                                  | Comment                | EJT-PRM184 f8-25 157mg mCARBONnight CDCl3 (e:\bruk400adata\2015\Jul)\ejt 52 |                      |            |
| Date                   | 14 Jul 2015 22:30:40                                                                                    | Date Stamp             | 14 Jul 2015 22:30:40                                                        |                      |            |
| File Name              | \\ss7a.ds.man.ac.uk\vol5\vol3\users\snmrdata\bruk400adata\2015\Jul\data\ejt\nmr\2015-07-14-ejt-52\13fid |                        |                                                                             | Frequency (MHz)      | 100.61     |
| Nucleus                | 13C                                                                                                     | Number of Transients   | 3000                                                                        | Origin               | AV400      |
| Owner                  | nmrsu                                                                                                   | Points Count           | 32768                                                                       | Pulse Sequence       | zgpg30     |
| SW(cyclical) (Hz)      | 24154.59                                                                                                | Solvent                | CHLOROFORM-d                                                                | Spectrum Offset (Hz) | 10059.2100 |
| Sweep Width (Hz)       | 24153.85                                                                                                | Temperature (degree C) | 22.900                                                                      | Spectrum Type        | STANDARD   |

PRM184-aldehyde-CNMR.esp

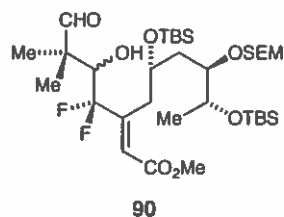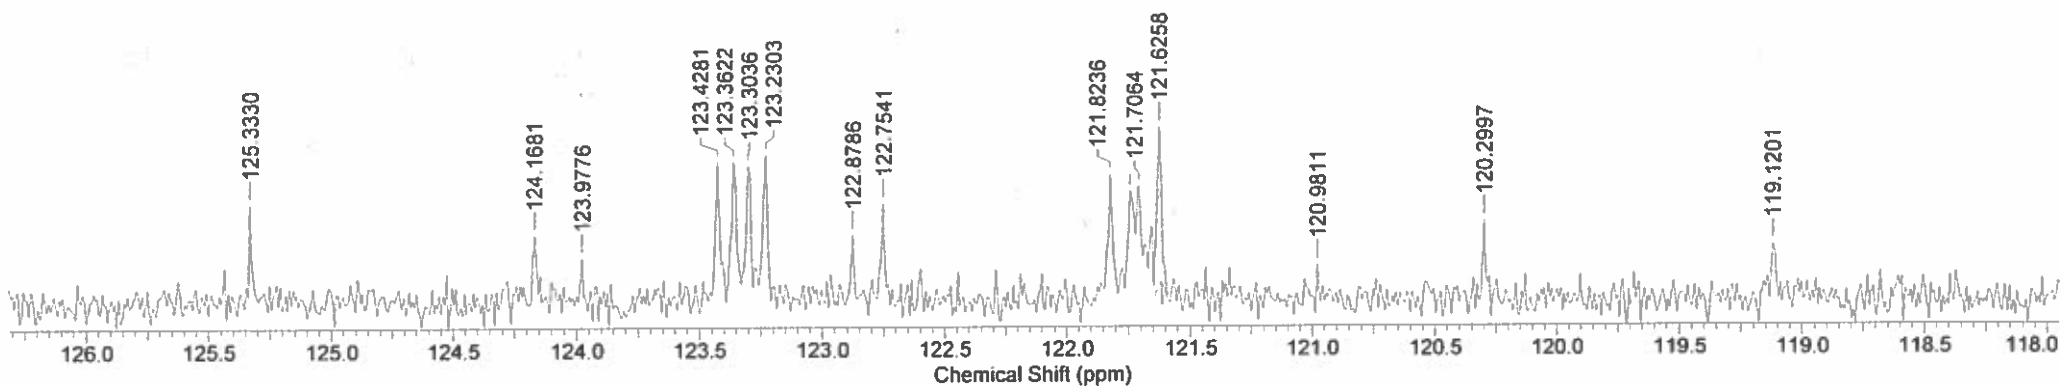



This report was created by ACD/NMR Processor Academic Edition. For more information go to [www.acdlabs.com/nmrproc/](http://www.acdlabs.com/nmrproc/)

|                                                                                                                           |                                                                                                         |                        |                                                                       |                      |             |                       |                 |        |
|---------------------------------------------------------------------------------------------------------------------------|---------------------------------------------------------------------------------------------------------|------------------------|-----------------------------------------------------------------------|----------------------|-------------|-----------------------|-----------------|--------|
| This report was created by ACD/NAME 1.0000001 Academic Edition V.01. More information go to: www.acdata.com/NAME1.0000001 |                                                                                                         |                        |                                                                       |                      |             |                       |                 |        |
| Acquisition Time (sec)                                                                                                    | 0.7340                                                                                                  | Comment                | EJT-PRM184 f8-25 157mg mF19CPD CDCl3 (e:\bruk400adata\2015Jul) ejt 52 |                      |             |                       |                 |        |
| Date                                                                                                                      | 14 Jul 2015 19:29:20                                                                                    | Date Stamp             | 14 Jul 2015 19:29:20                                                  |                      |             |                       |                 |        |
| File Name                                                                                                                 | \\ss7a.ds.man.ac.uk\vol5\vol3\users\snmrdata\bruk400adata\2015Jul\data\ejt\nmr\2015-07-14-ejt-52\12\fid |                        |                                                                       |                      |             |                       | Frequency (MHz) | 376.50 |
| Nucleus                                                                                                                   | 19F                                                                                                     | Number of Transients   | 16                                                                    | Origin               | AV400       | Original Points Count | 65536           |        |
| Owner                                                                                                                     | nmrsu                                                                                                   | Points Count           | 65536                                                                 | Pulse Sequence       | zgig        | Receiver Gain         | 362.00          |        |
| SW(cyclical) (Hz)                                                                                                         | 89285.71                                                                                                | Solvent                | CHLOROFORM-d                                                          | Spectrum Offset (Hz) | -37649.5977 | Spectrum Type         | STANDARD        |        |
| Sweep Width (Hz)                                                                                                          | 89284.35                                                                                                | Temperature (degree C) | 21.500                                                                |                      |             |                       |                 |        |

PRM184-aldehyde-F{H}NMR.esp

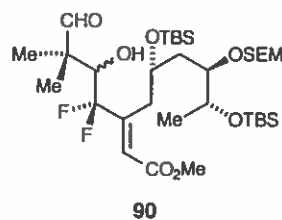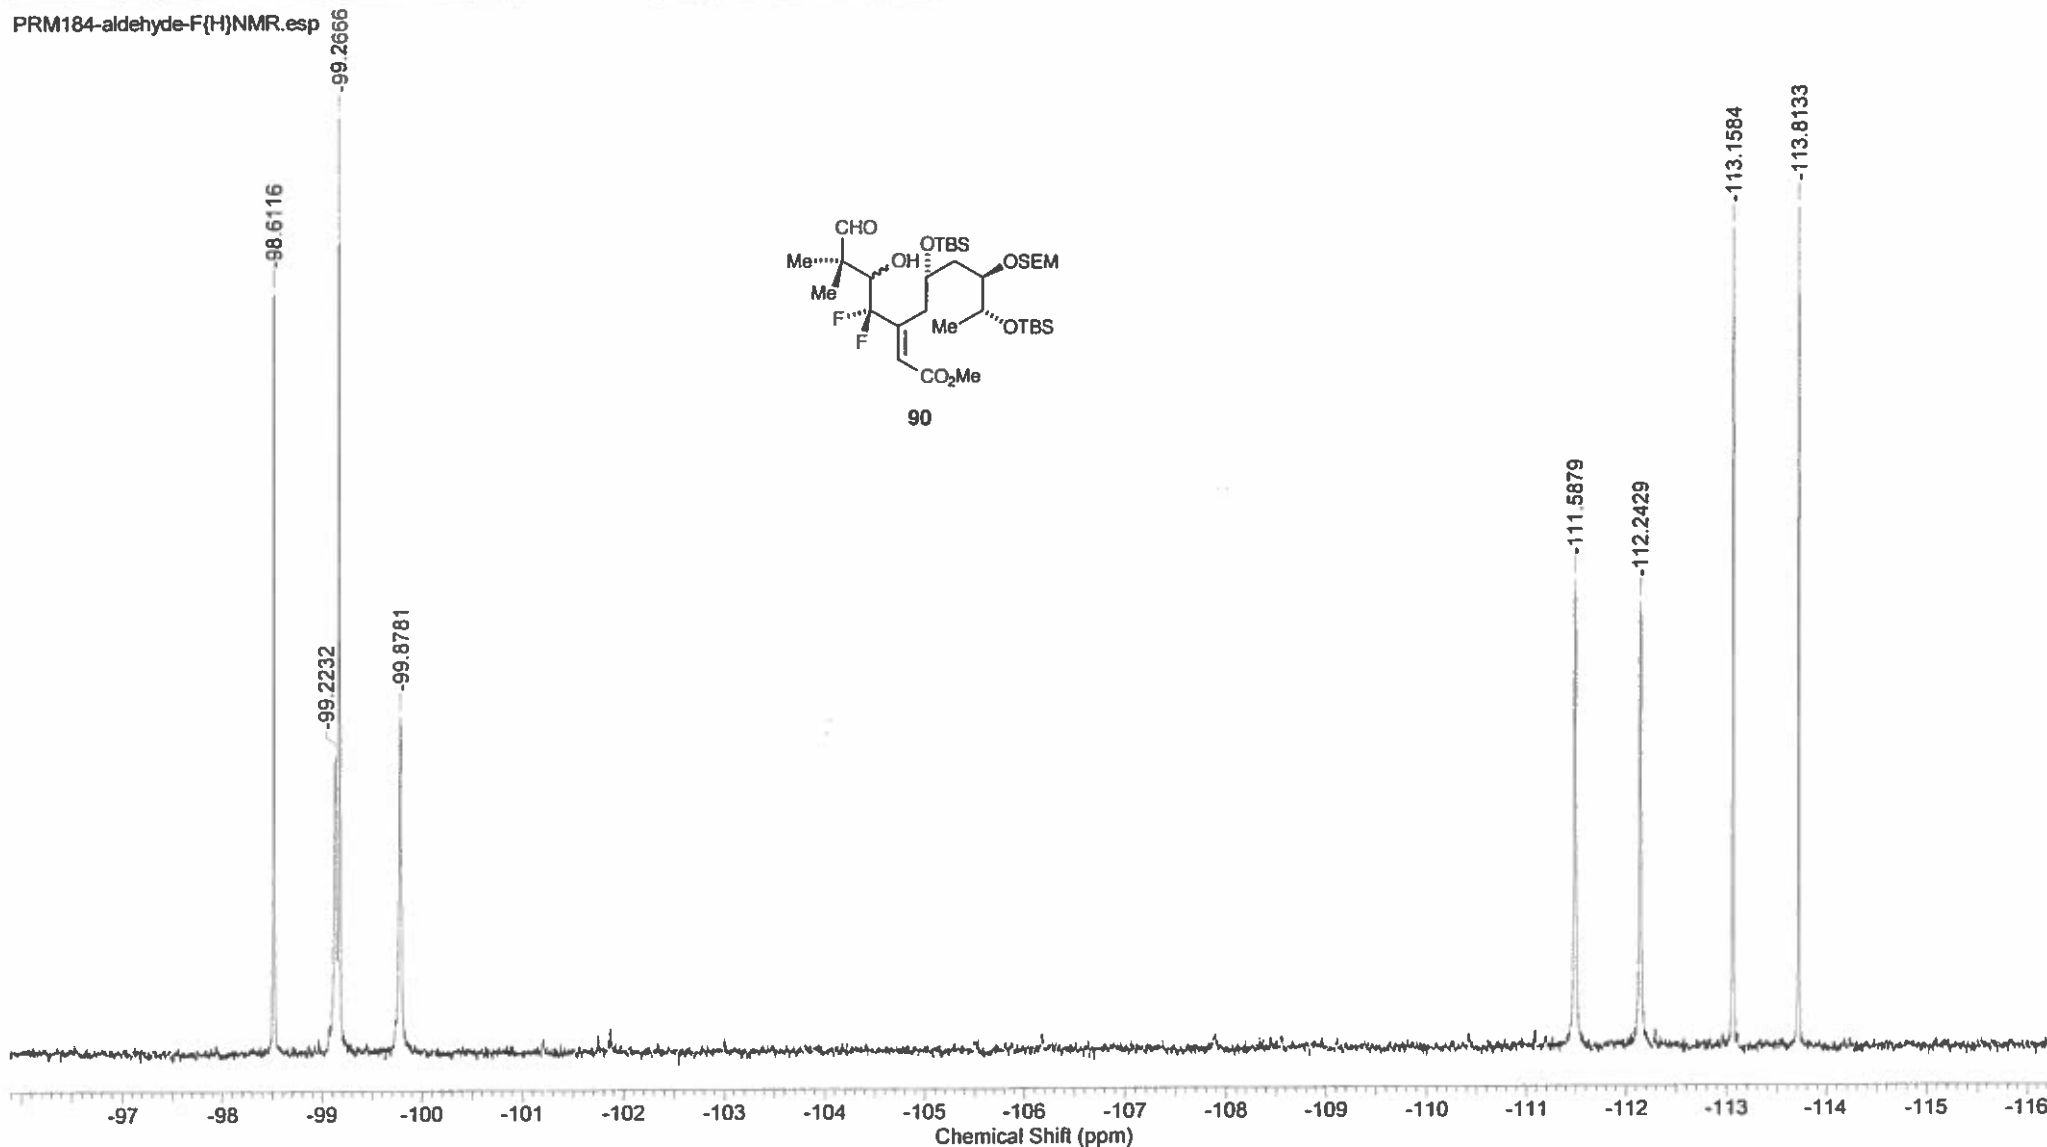

|                        |                                                                                                         |                        |                                                                        |                      |           |
|------------------------|---------------------------------------------------------------------------------------------------------|------------------------|------------------------------------------------------------------------|----------------------|-----------|
| Acquisition Time (sec) | 3.9649                                                                                                  | Comment                | EJT-PRM185 f15-33 118mg mPROTON CDCl3 {e:\bruk400adata\2015Jul} ejt 40 |                      |           |
| Date                   | 16 Jul 2015 16:08:48                                                                                    | Date Stamp             | 16 Jul 2015 16:08:48                                                   |                      |           |
| File Name              | \\ss7a.ds.man.ac.uk\vol5\vol3\users\snmrdata\bruk400adata\2015Jul\data\ejt\1nmr\2015-07-16-ejt-40\10vid |                        |                                                                        | Frequency (MHz)      | 400.13    |
| Nucleus                | 1H                                                                                                      | Number of Transients   | 16                                                                     | Origin               | AV400     |
| Owner                  | nmrsu                                                                                                   | Points Count           | 32768                                                                  | Pulse Sequence       | zg30b     |
| SW(cyclical) (Hz)      | 8264.46                                                                                                 | Solvent                | CHLOROFORM-d                                                           | Spectrum Offset (Hz) | 2464.9270 |
| Sweep Width (Hz)       | 8264.21                                                                                                 | Temperature (degree C) | 21.500                                                                 | Spectrum Type        | STANDARD  |

PRM185-HNMR.esp

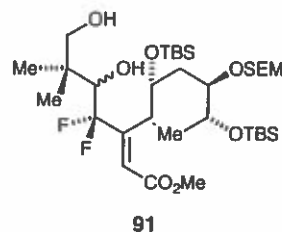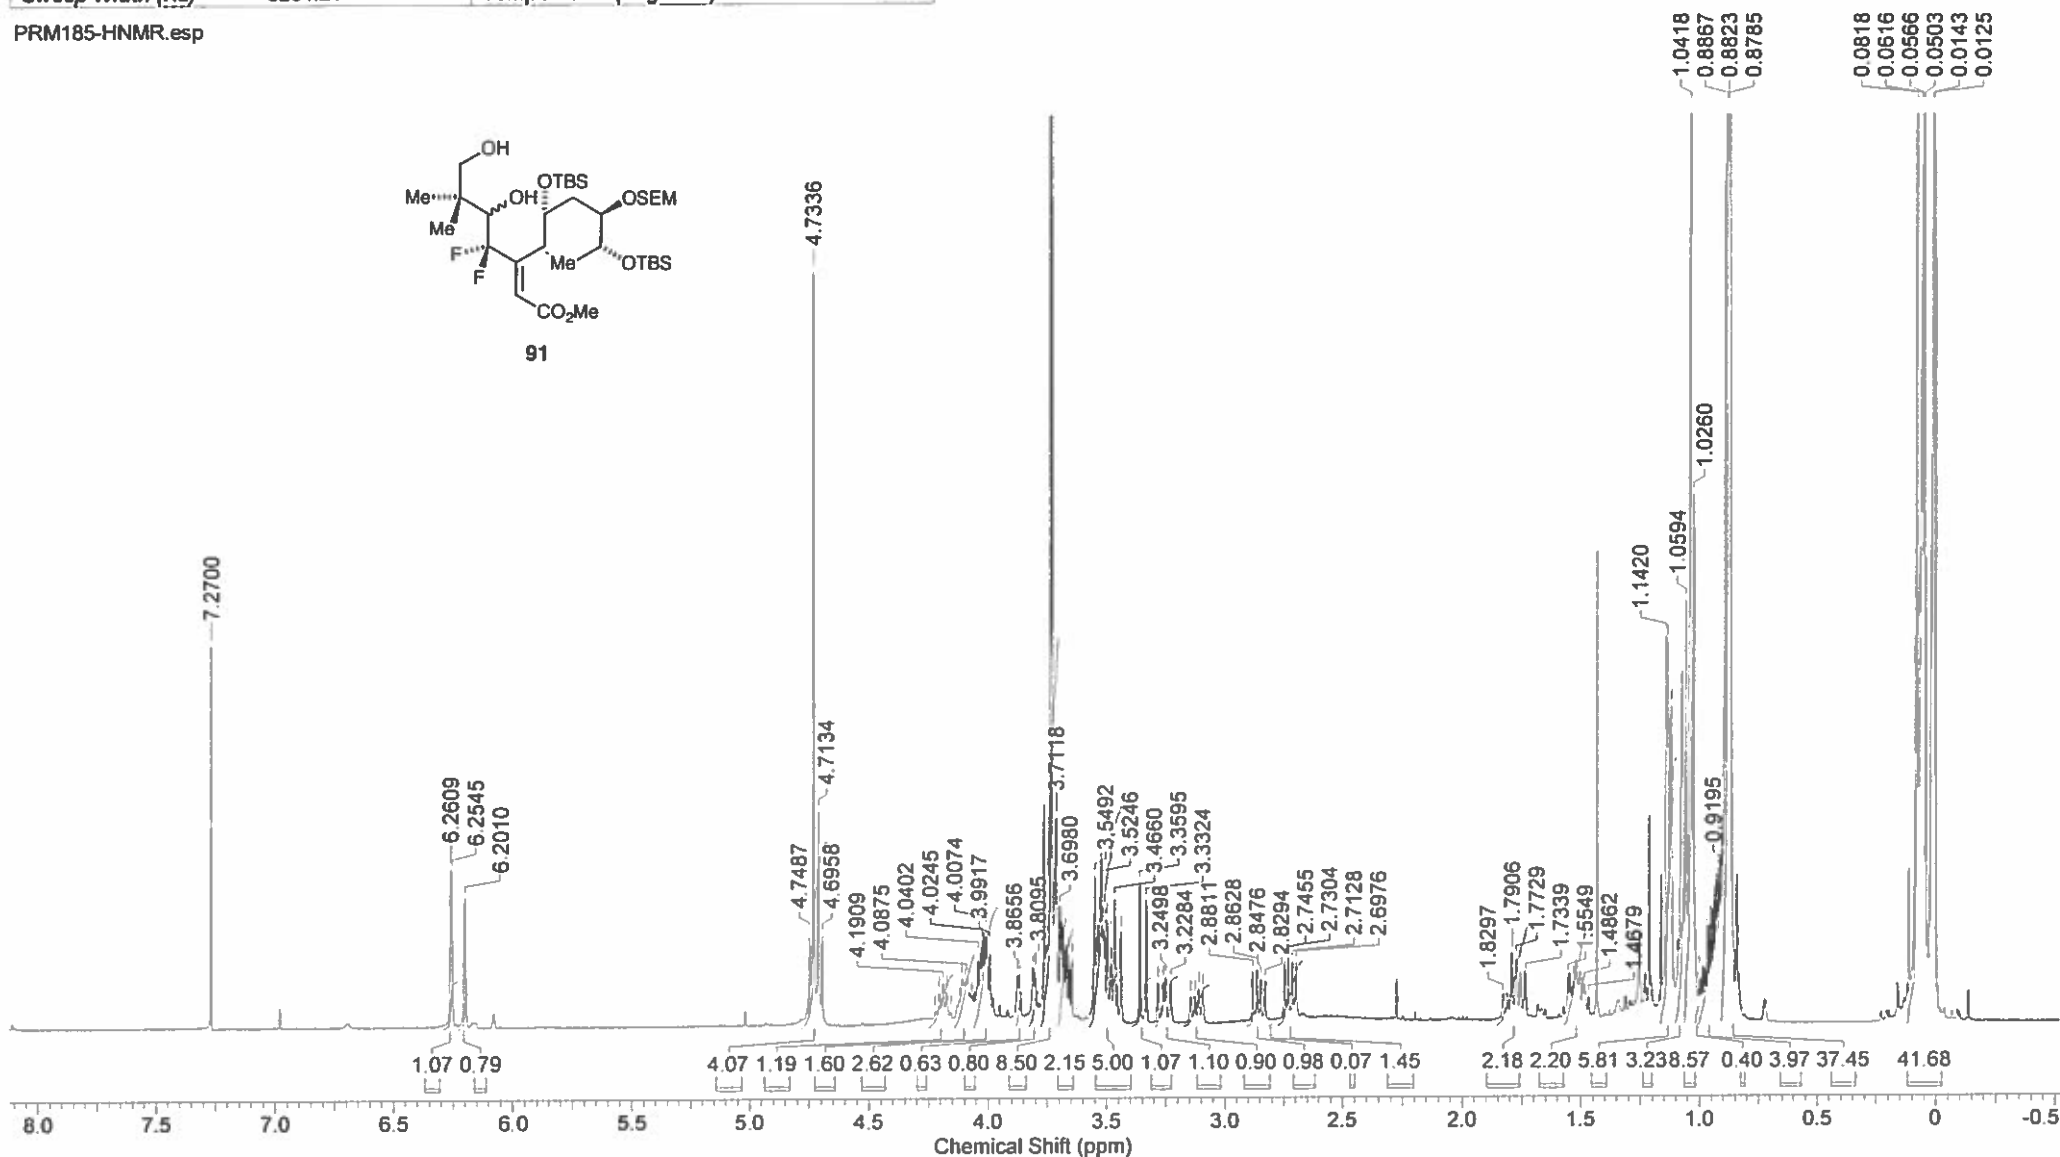

This report was created by ACD/NMR Processor Academic Edition. For more information go to [www.acdlabs.com/nmrproc/](http://www.acdlabs.com/nmrproc/)

|                        |                                                                                                        |                        |                                                                  |                      |                 |                       |          |
|------------------------|--------------------------------------------------------------------------------------------------------|------------------------|------------------------------------------------------------------|----------------------|-----------------|-----------------------|----------|
| Acquisition Time (sec) | 1.3631                                                                                                 | Comment                | EJT-PRM185 Prod mCARBON_B CDCl3 (e:\bruk400cdata\2015Jul) ejt 20 |                      |                 |                       |          |
| Date                   | 22 Jul 2015 23:41:04                                                                                   |                        | Date Stamp                                                       | 22 Jul 2015 23:41:04 |                 |                       |          |
| File Name              | \\ss7a.ds.man.ac.uk\vol5\vol3\users\snmrdata\bruk400cdata\2015Jul\data\ejt\nmr\2015-07-22-ejt-20\10vid |                        |                                                                  |                      | Frequency (MHz) | 100.60                |          |
| Nucleus                | 13C                                                                                                    | Number of Transients   | 1024                                                             | Origin               | spect           | Original Points Count | 32768    |
| Owner                  | nrmrsu                                                                                                 | Points Count           | 32768                                                            | Pulse Sequence       | zgpg30          | Receiver Gain         | 45.20    |
| SW(cyclical) (Hz)      | 24038.46                                                                                               | Solvent                | CHLOROFORM-d                                                     | Spectrum Offset (Hz) | 10050.6006      | Spectrum Type         | STANDARD |
| Sweep Width (Hz)       | 24037.73                                                                                               | Temperature (degree C) | 17.967                                                           |                      |                 |                       |          |

PRM185-CNMR-2.esp

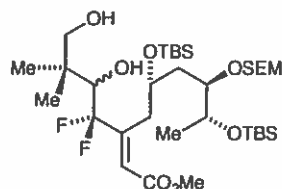

91

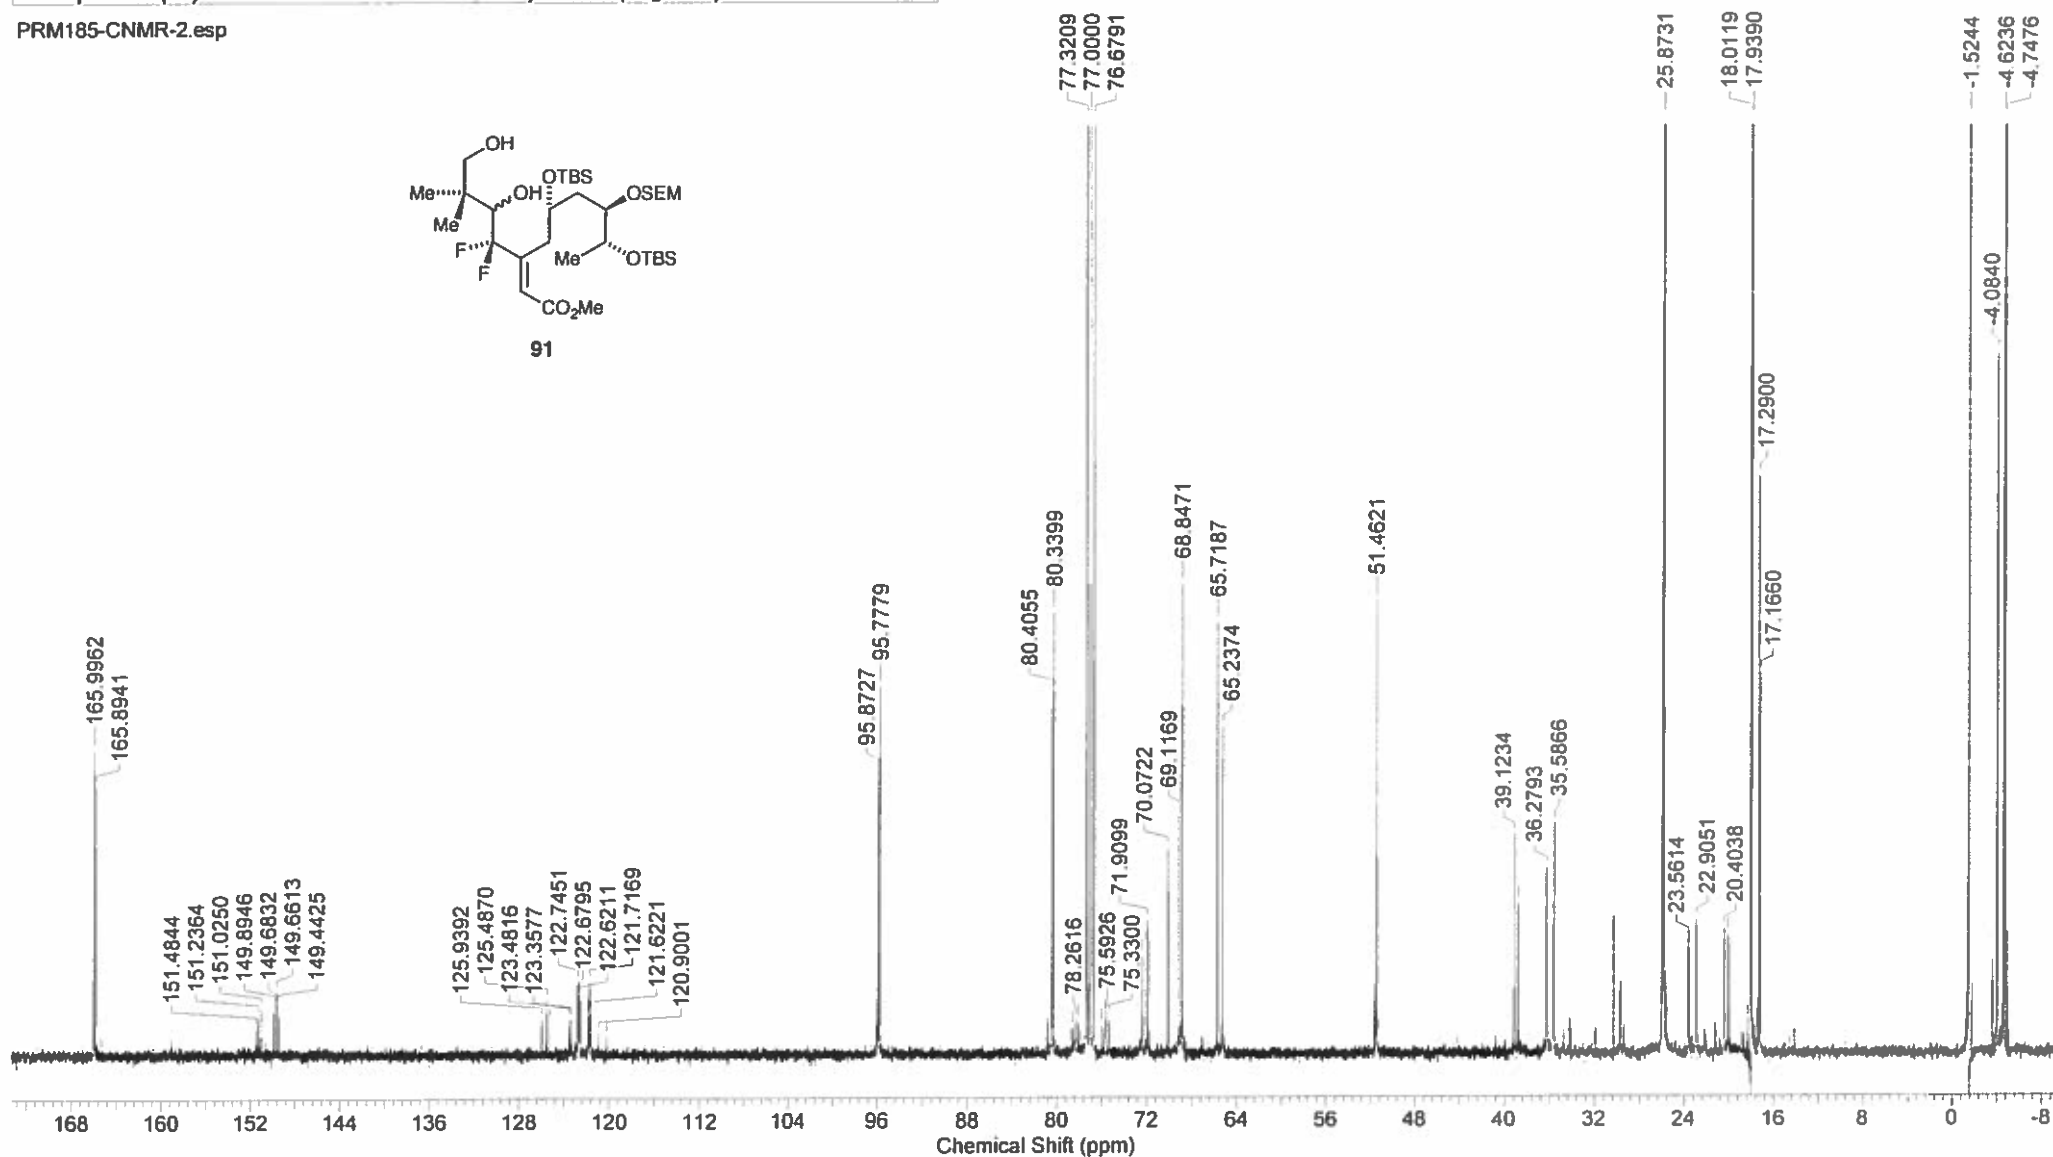

This report was created by ACD/NMR Processor Academic Edition. For more information go to [www.acdlabs.com/nmrproc/](http://www.acdlabs.com/nmrproc/)

|                        |                                                                                                          |                        |                                                                   |                      |                 |                       |          |
|------------------------|----------------------------------------------------------------------------------------------------------|------------------------|-------------------------------------------------------------------|----------------------|-----------------|-----------------------|----------|
| Acquisition Time (sec) | 1.3631                                                                                                   | Comment                | EJT-PRM185 Prod mCARBON B CDCl3 (e:\bruk400cdata\2015\Jul) ejt 20 |                      |                 |                       |          |
| Date                   | 22 Jul 2015 23:41:04                                                                                     |                        | Date Stamp                                                        | 22 Jul 2015 23:41:04 |                 |                       |          |
| File Name              | \\ss7a.ds.man.ac.uk\vol5\vol3\users\snmrdata\bruk400cdata\2015\Jul\data\ejt\nmr\2015-07-22-ejt-20\10\fid |                        |                                                                   |                      | Frequency (MHz) | 100.60                |          |
| Nucleus                | 13C                                                                                                      | Number of Transients   | 1024                                                              | Origin               | spect           | Original Points Count | 32768    |
| Owner                  | nmsu                                                                                                     | Points Count           | 32768                                                             | Pulse Sequence       | zgpg30          | Receiver Gain         | 45.20    |
| SW(cyclical) (Hz)      | 24038.46                                                                                                 | Solvent                | CHLOROFORM-d                                                      | Spectrum Offset (Hz) | 10050.6006      | Spectrum Type         | STANDARD |
| Sweep Width (Hz)       | 24037.73                                                                                                 | Temperature (degree C) | 17.967                                                            |                      |                 |                       |          |

2015-07-22-ejt-20.010.esp

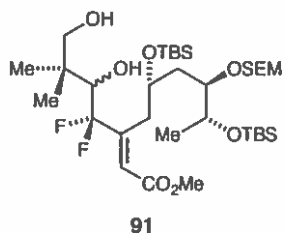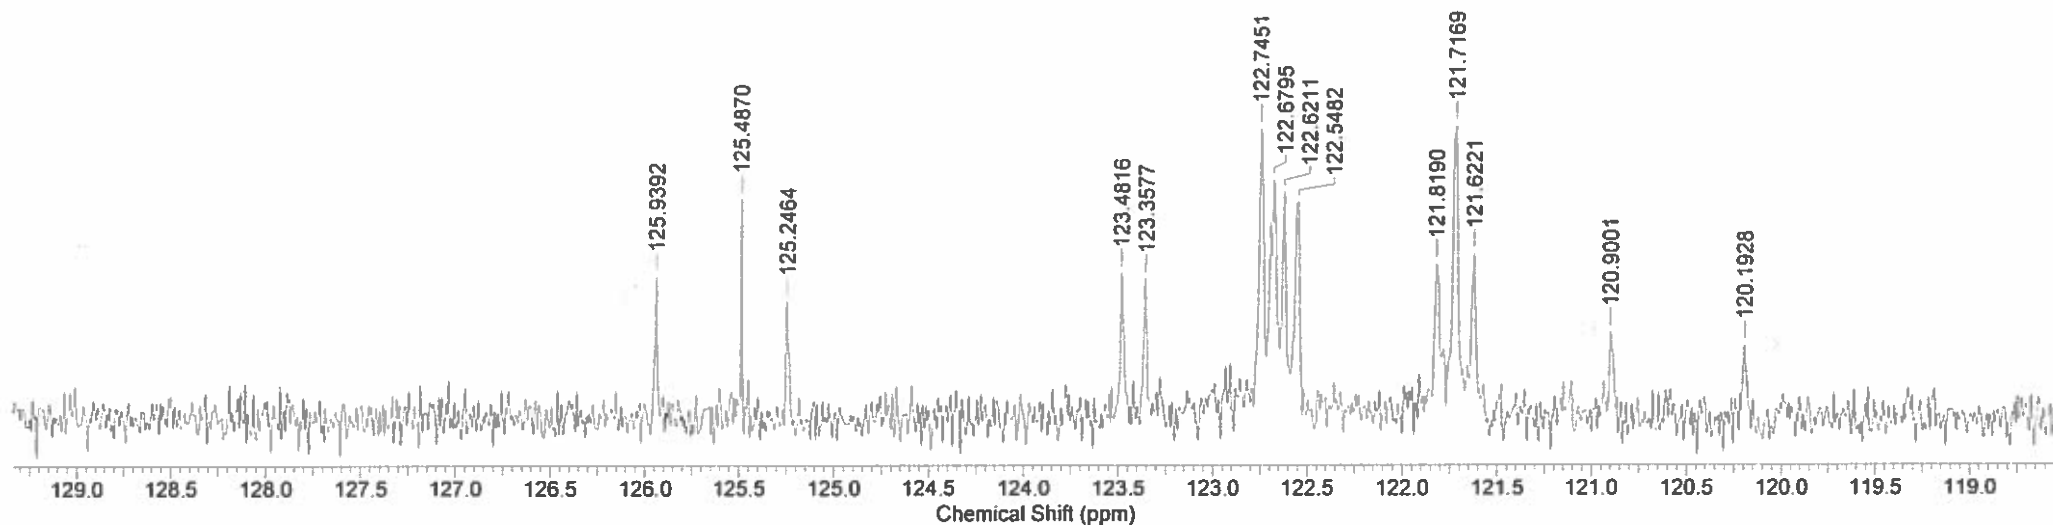

This report was created by ACD/NMR Processor Academic Edition. For more information go to [www.acdlabs.com/nmrproc/](http://www.acdlabs.com/nmrproc/)

|                                                                                                                      |                                                                                                          |                        |                                                                         |                      |                 |                       |          |
|----------------------------------------------------------------------------------------------------------------------|----------------------------------------------------------------------------------------------------------|------------------------|-------------------------------------------------------------------------|----------------------|-----------------|-----------------------|----------|
| This report was created by ACD/NAME 1 PROCESSOR Academic License For more information go to: www.academiclicense.com |                                                                                                          |                        |                                                                         |                      |                 |                       |          |
| Acquisition Time (sec)                                                                                               | 0.7340                                                                                                   | Comment                | EJT-PRM185 f15-33 118mg mF19CPD CDCl3 {e:\bruk400adata\2015\Jul} ejt 40 |                      |                 |                       |          |
| Date                                                                                                                 | 16 Jul 2015 16:13:04                                                                                     | Date Stamp             | 16 Jul 2015 16:13:04                                                    |                      |                 |                       |          |
| File Name                                                                                                            | \\ss7a.ds.man.ac.uk\vol5\vol3\users\snmrdata\bruk400adata\2015\Jul\data\ejt\nmr\2015-07-16-ejt-40\12\fid |                        |                                                                         |                      | Frequency (MHz) | 376.50                |          |
| Nucleus                                                                                                              | 19F                                                                                                      | Number of Transients   | 16                                                                      | Origin               | AV400           | Original Points Count | 65536    |
| Owner                                                                                                                | nmrsu                                                                                                    | Points Count           | 65536                                                                   | Pulse Sequence       | zgig            | Receiver Gain         | 362.00   |
| SW(cyclical) (Hz)                                                                                                    | 89285.71                                                                                                 | Solvent                | CHLOROFORM-d                                                            | Spectrum Offset (Hz) | -37649.5977     | Spectrum Type         | STANDARD |
| Sweep Width (Hz)                                                                                                     | 89284.35                                                                                                 | Temperature (degree C) | 21.700                                                                  |                      |                 |                       |          |

PRM185-F{H}NMR.exp

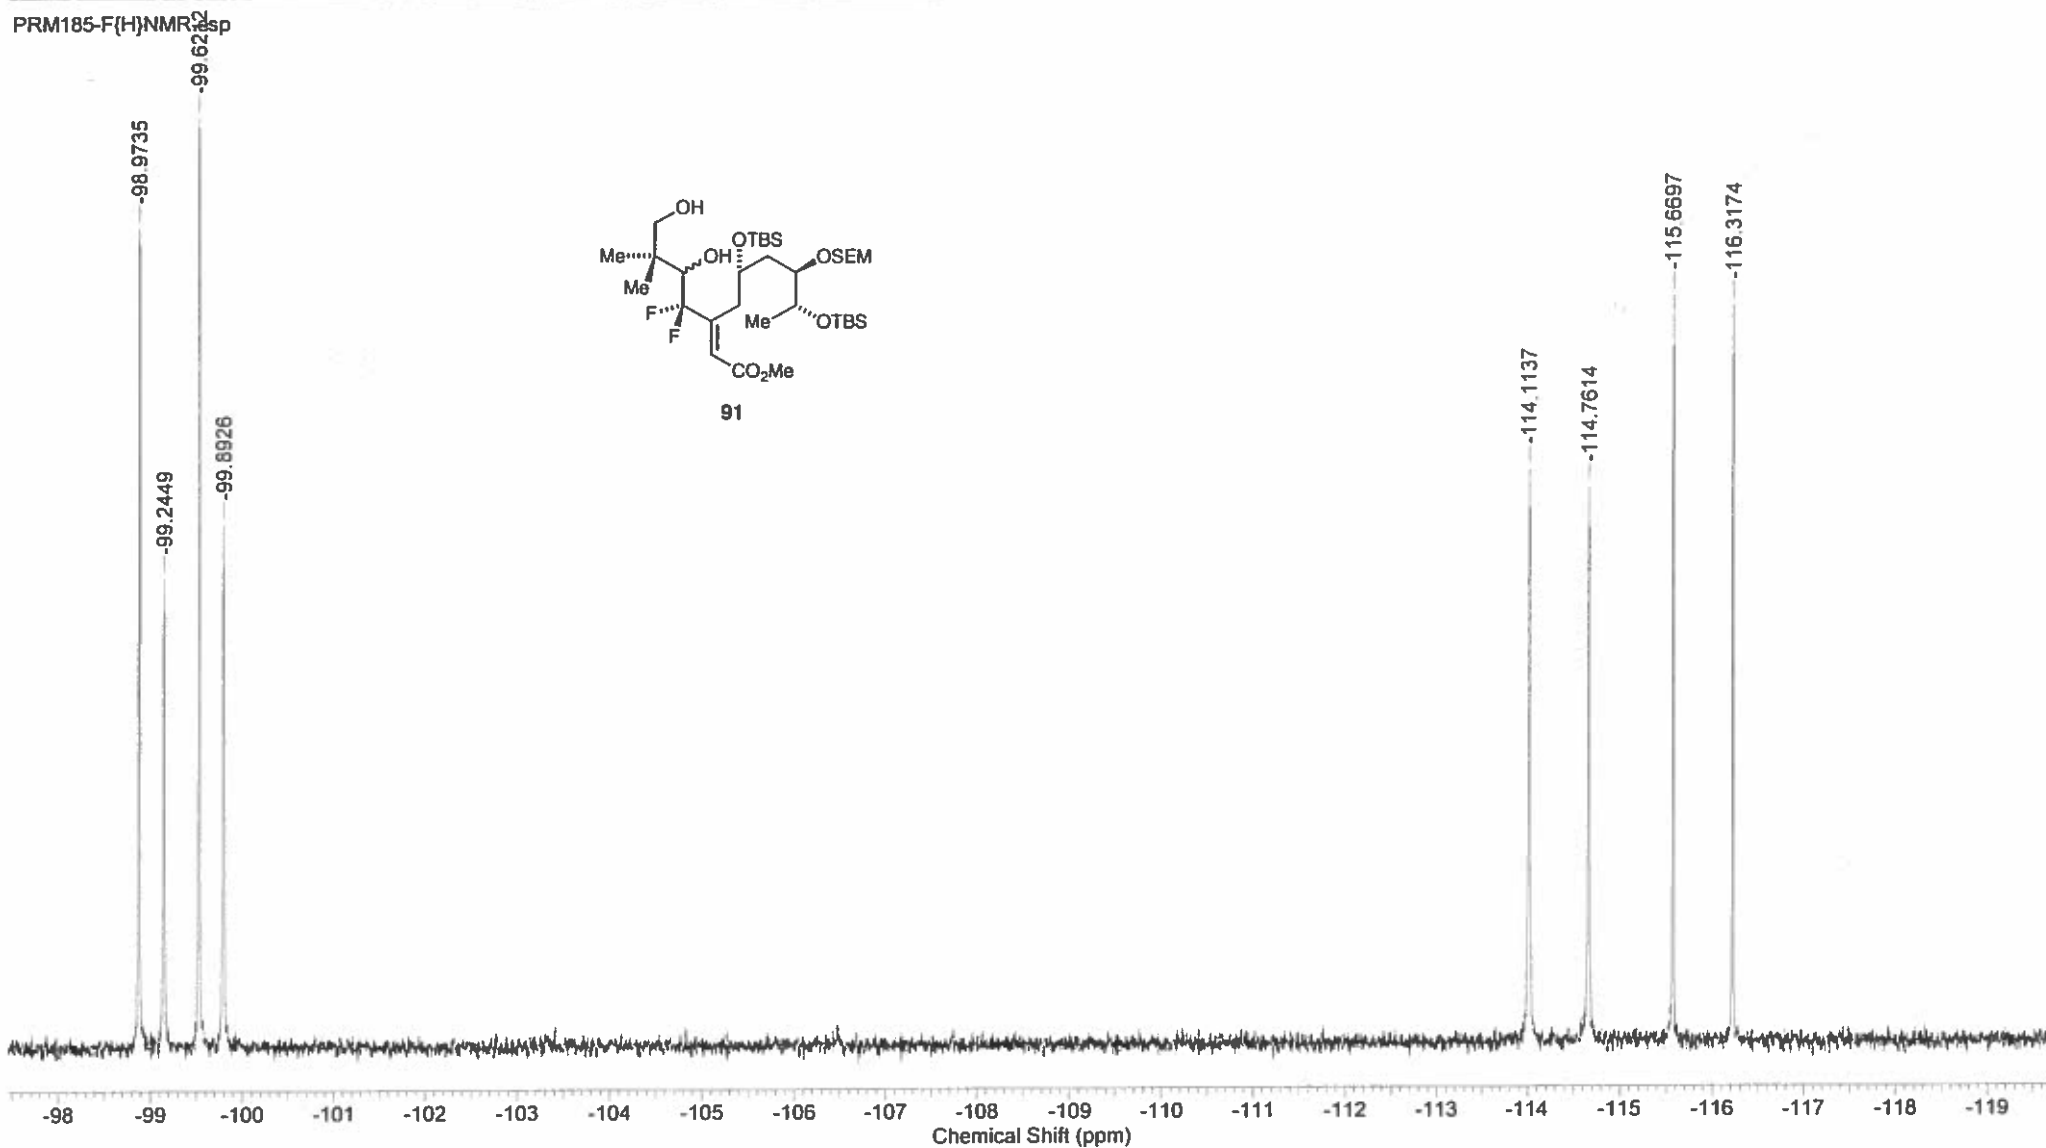

This report was created by ACD/NMR Processor Academic Edition. For more information go to [www.acdlabs.com/nmrproc/](http://www.acdlabs.com/nmrproc/)

|                                                                                                                                       |                                                                                     |                        |                                                                        |                      |                 |                       |          |
|---------------------------------------------------------------------------------------------------------------------------------------|-------------------------------------------------------------------------------------|------------------------|------------------------------------------------------------------------|----------------------|-----------------|-----------------------|----------|
| This report was created by ACD/NAME 1 PROCESSOR Academic Edition 1.01. More information go to: <a href="#">http://www.acdname.com</a> |                                                                                     |                        |                                                                        |                      |                 |                       |          |
| Acquisition Time (sec)                                                                                                                | 4.0894                                                                              | Comment                | EJT-PRM189 f3-15 16mg mPROTON_A CDCl3 (e:\bruk400cdata\2015Jul)\ejt_32 |                      |                 |                       |          |
| Date                                                                                                                                  | 05 Aug 2015 12:46:08                                                                | Date Stamp             | 05 Aug 2015 12:46:08                                                   |                      |                 |                       |          |
| File Name                                                                                                                             | \\ss7a.ds.man.ac.uk\vol5\vol3\users\snmrdata\bruk400cdata\2015Jul\data\ejt_32\10vid |                        |                                                                        |                      | Frequency (MHz) | 400.07                |          |
| Nucleus                                                                                                                               | <sup>1</sup> H                                                                      | Number of Transients   | 4                                                                      | Origin               | spect           | Original Points Count | 32768    |
| Owner                                                                                                                                 | nmrsu                                                                               | Points Count           | 32768                                                                  | Pulse Sequence       | zg30            | Receiver Gain         | 161.00   |
| SW(cyclical) (Hz)                                                                                                                     | 8012.82                                                                             | Solvent                | CHLOROFORM-d                                                           | Spectrum Offset (Hz) | 1894.3132       | Spectrum Type         | STANDARD |
| Sweep Width (Hz)                                                                                                                      | 8012.58                                                                             | Temperature (degree C) | 18.208                                                                 |                      |                 |                       |          |

PRM189-HNMR.esp

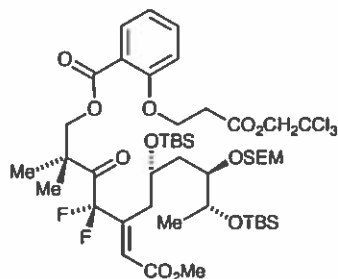

93

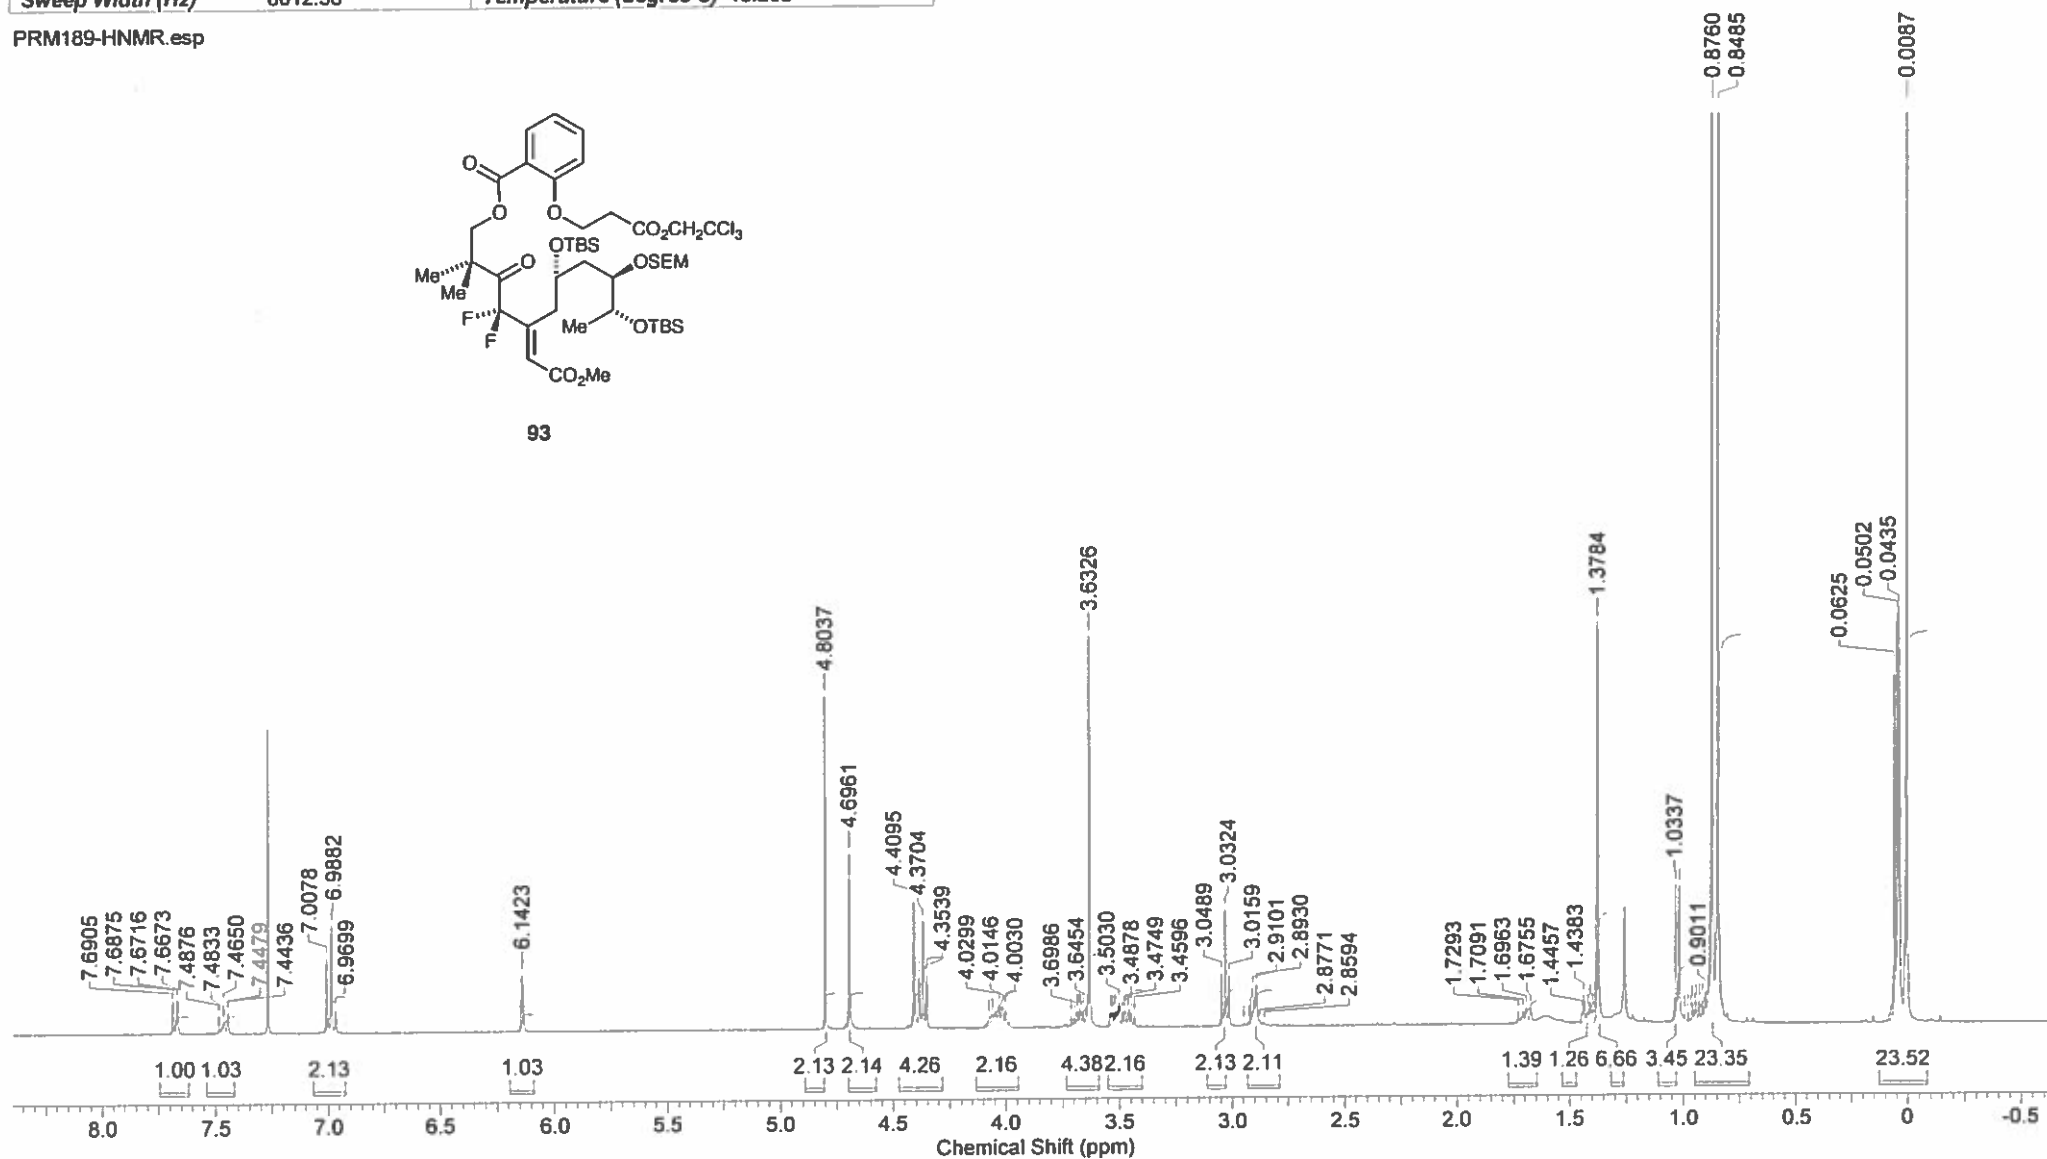

This report was created by ACD/NMR Processor Academic Edition. For more information go to [www.acdlabs.com/nmrproc/](http://www.acdlabs.com/nmrproc/)

|                        |                                                                                                         |                        |                                                                   |                      |                 |                       |          |
|------------------------|---------------------------------------------------------------------------------------------------------|------------------------|-------------------------------------------------------------------|----------------------|-----------------|-----------------------|----------|
| Acquisition Time (sec) | 1.3631                                                                                                  | Comment                | EJT-PRM189 prod mCARBON_A CDCl3 (e:\bruk400cdata\2015\Aug)\ejt-54 |                      |                 |                       |          |
| Date                   | 20 Aug 2015 16:00:16                                                                                    |                        | Date Stamp                                                        | 20 Aug 2015 16:00:16 |                 |                       |          |
| File Name              | \ss7a.ds.man.ac.uk\vol5\vol3\users\snmrdata\bruk400cdata\2015\Aug\data\ejt\nmr\2015-08-20-ejt-54\11\fid |                        |                                                                   |                      | Frequency (MHz) | 100.60                |          |
| Nucleus                | 13C                                                                                                     | Number of Transients   | 256                                                               | Origin               | spect           | Original Points Count | 32768    |
| Owner                  | nrmru                                                                                                   | Points Count           | 32768                                                             | Pulse Sequence       | zgpg30          | Receiver Gain         | 71.80    |
| SW(cyclical) (Hz)      | 24038.46                                                                                                | Solvent                | CHLOROFORM-d                                                      | Spectrum Offset (Hz) | 10049.8672      | Spectrum Type         | STANDARD |
| Sweep Width (Hz)       | 24037.73                                                                                                | Temperature (degree C) | 18.046                                                            |                      |                 |                       |          |

PRM189-CNMR.esp

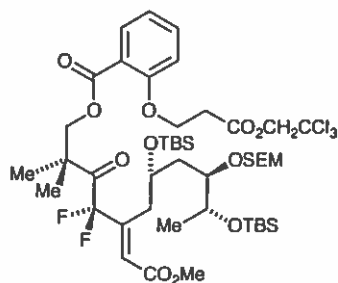

93

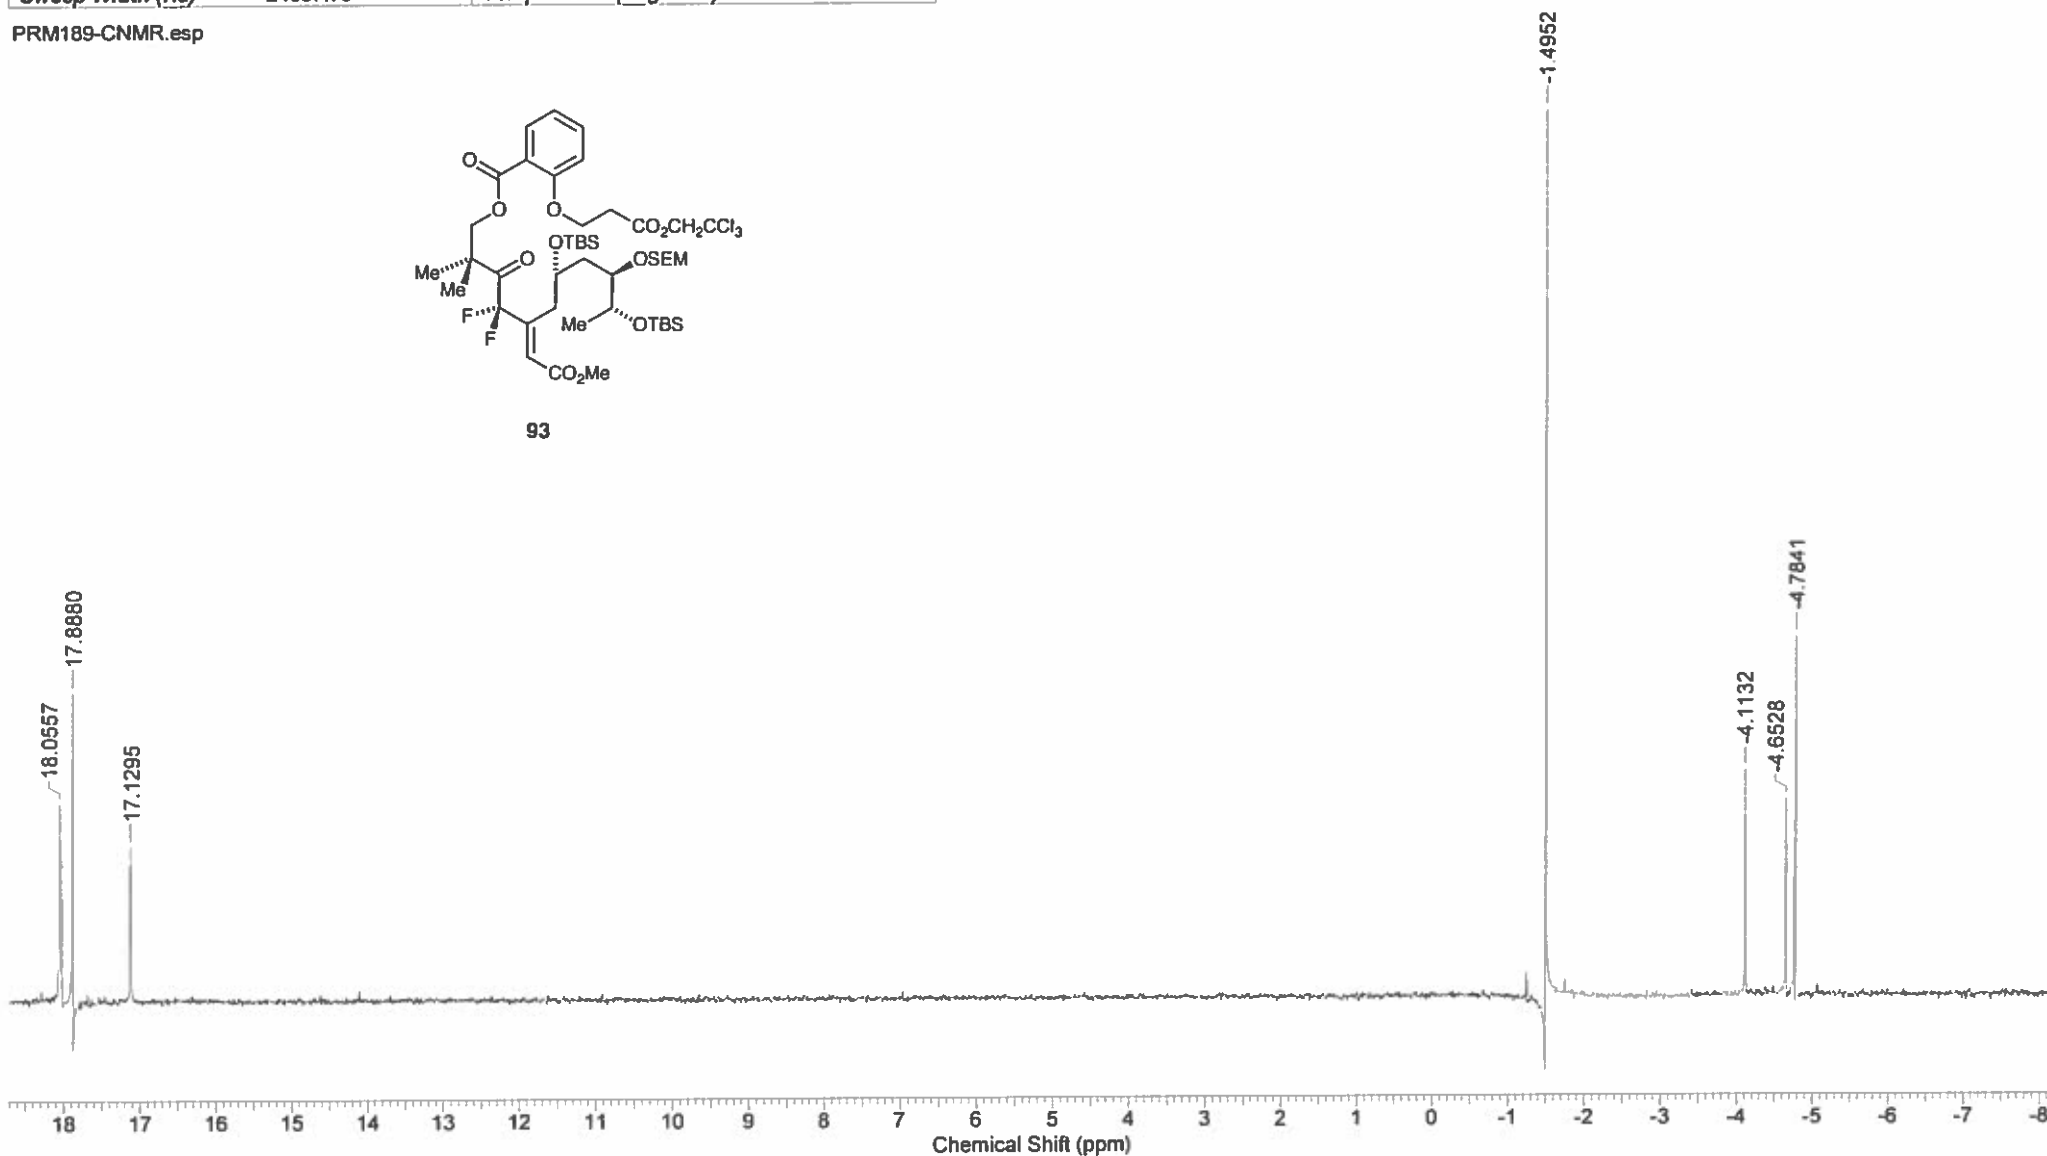

This report was created by ACD/NMR Processor Academic Edition. For more information go to [www.acdlabs.com/nmrproc/](http://www.acdlabs.com/nmrproc/)

|                        |                                                                                                         |                        |                                                                   |                      |                 |                       |          |
|------------------------|---------------------------------------------------------------------------------------------------------|------------------------|-------------------------------------------------------------------|----------------------|-----------------|-----------------------|----------|
| Acquisition Time (sec) | 1.3631                                                                                                  | Comment                | EJT-PRM189 prod mCARBON_A CDCl3 (e:\bruk400cdata\2015\Aug)\ejt 54 |                      |                 |                       |          |
| Date                   | 20 Aug 2015 16:00:16                                                                                    |                        | Date Stamp                                                        | 20 Aug 2015 16:00:16 |                 |                       |          |
| File Name              | \\ss7a.ds.man.ac.uk\vol5\vol3\users\snmrdata\bruk400cdata\2015\Aug\data\ejt\nmr\2015-08-20-ejt-54\11Vid |                        |                                                                   |                      | Frequency (MHz) | 100.60                |          |
| Nucleus                | 13C                                                                                                     | Number of Transients   | 256                                                               | Origin               | spect           | Original Points Count | 32768    |
| Owner                  | nmrsu                                                                                                   | Points Count           | 32768                                                             | Pulse Sequence       | zgpg30          | Receiver Gain         | 71.80    |
| SW(cyclical) (Hz)      | 24038.46                                                                                                | Solvent                | CHLOROFORM-d                                                      | Spectrum Offset (Hz) | 10049.8672      | Spectrum Type         | STANDARD |
| Sweep Width (Hz)       | 24037.73                                                                                                | Temperature (degree C) | 18.046                                                            |                      |                 |                       |          |

PRM189-CNMR.esp

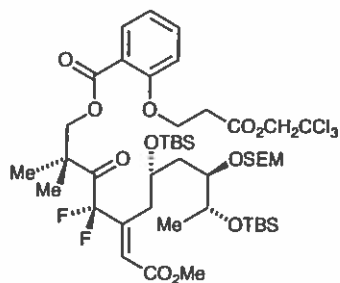

93

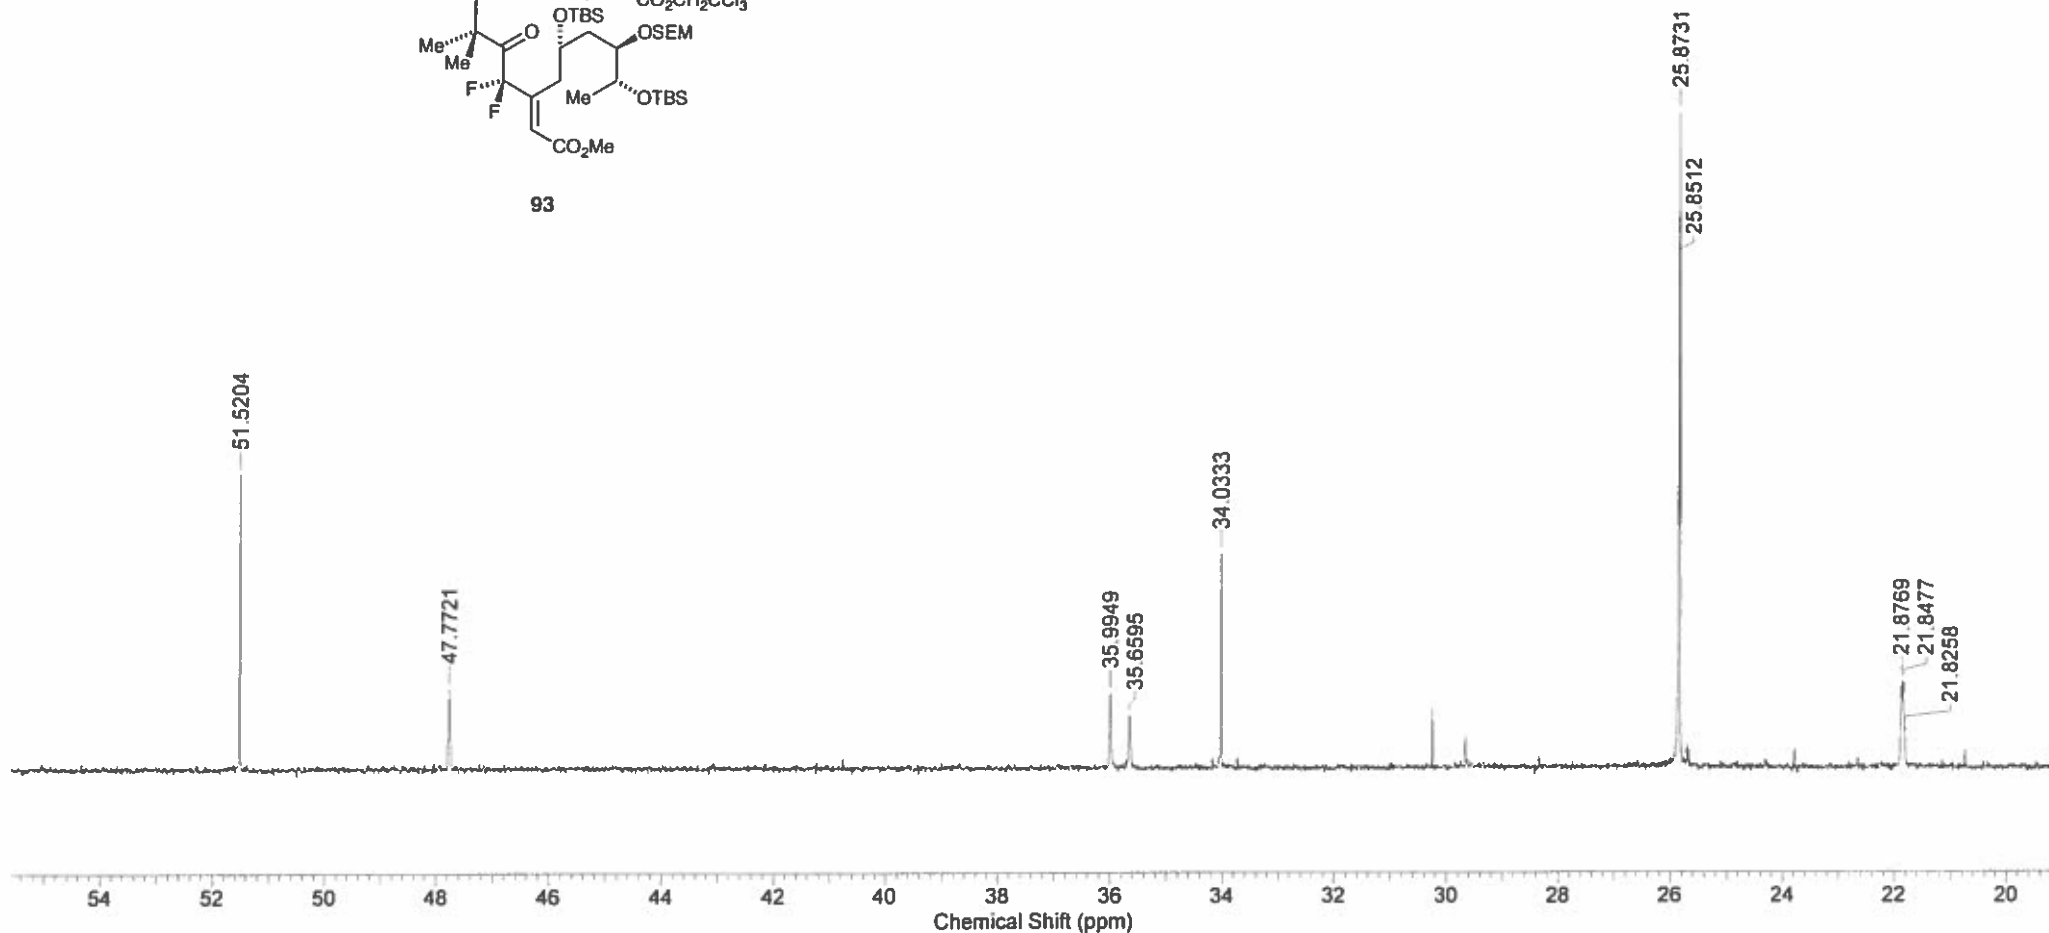



This report was created by ACD/NMR Processor Academic Edition. For more information go to [www.acdlabs.com/nmrproc/](http://www.acdlabs.com/nmrproc/)

|                        |                                                                                                          |                        |                                                                   |                      |                 |                       |          |
|------------------------|----------------------------------------------------------------------------------------------------------|------------------------|-------------------------------------------------------------------|----------------------|-----------------|-----------------------|----------|
| Acquisition Time (sec) | 1.3631                                                                                                   | Comment                | EJT-PRM189 prod mCARBON_A CDCl3 (e:\bruk400cdata\2015\Aug) ejt 54 |                      |                 |                       |          |
| Date                   | 20 Aug 2015 16:00:16                                                                                     | Date Stamp             | 20 Aug 2015 16:00:16                                              |                      |                 |                       |          |
| File Name              | \\ss7a.ds.man.ac.uk\vol5\vol3\users\snmrdata\bruk400cdata\2015\Aug\data\ejt\nmr\2015-08-20-ejt-54\11\fid |                        |                                                                   |                      | Frequency (MHz) | 100.60                |          |
| Nucleus                | 13C                                                                                                      | Number of Transients   | 256                                                               | Origin               | spect           | Original Points Count | 32768    |
| Owner                  | nmrsu                                                                                                    | Points Count           | 32768                                                             | Pulse Sequence       | zgpg30          | Receiver Gain         | 71.80    |
| SW(cyclical) (Hz)      | 24038.46                                                                                                 | Solvent                | CHLOROFORM-d                                                      | Spectrum Offset (Hz) | 10049.8672      | Spectrum Type         | STANDARD |
| Sweep Width (Hz)       | 24037.73                                                                                                 | Temperature (degree C) | 18.046                                                            |                      |                 |                       |          |

PRM189-CNMR.esp

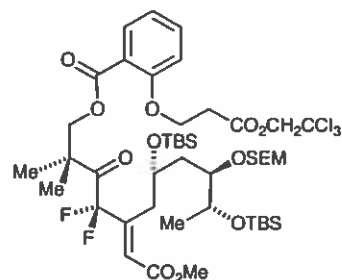

93

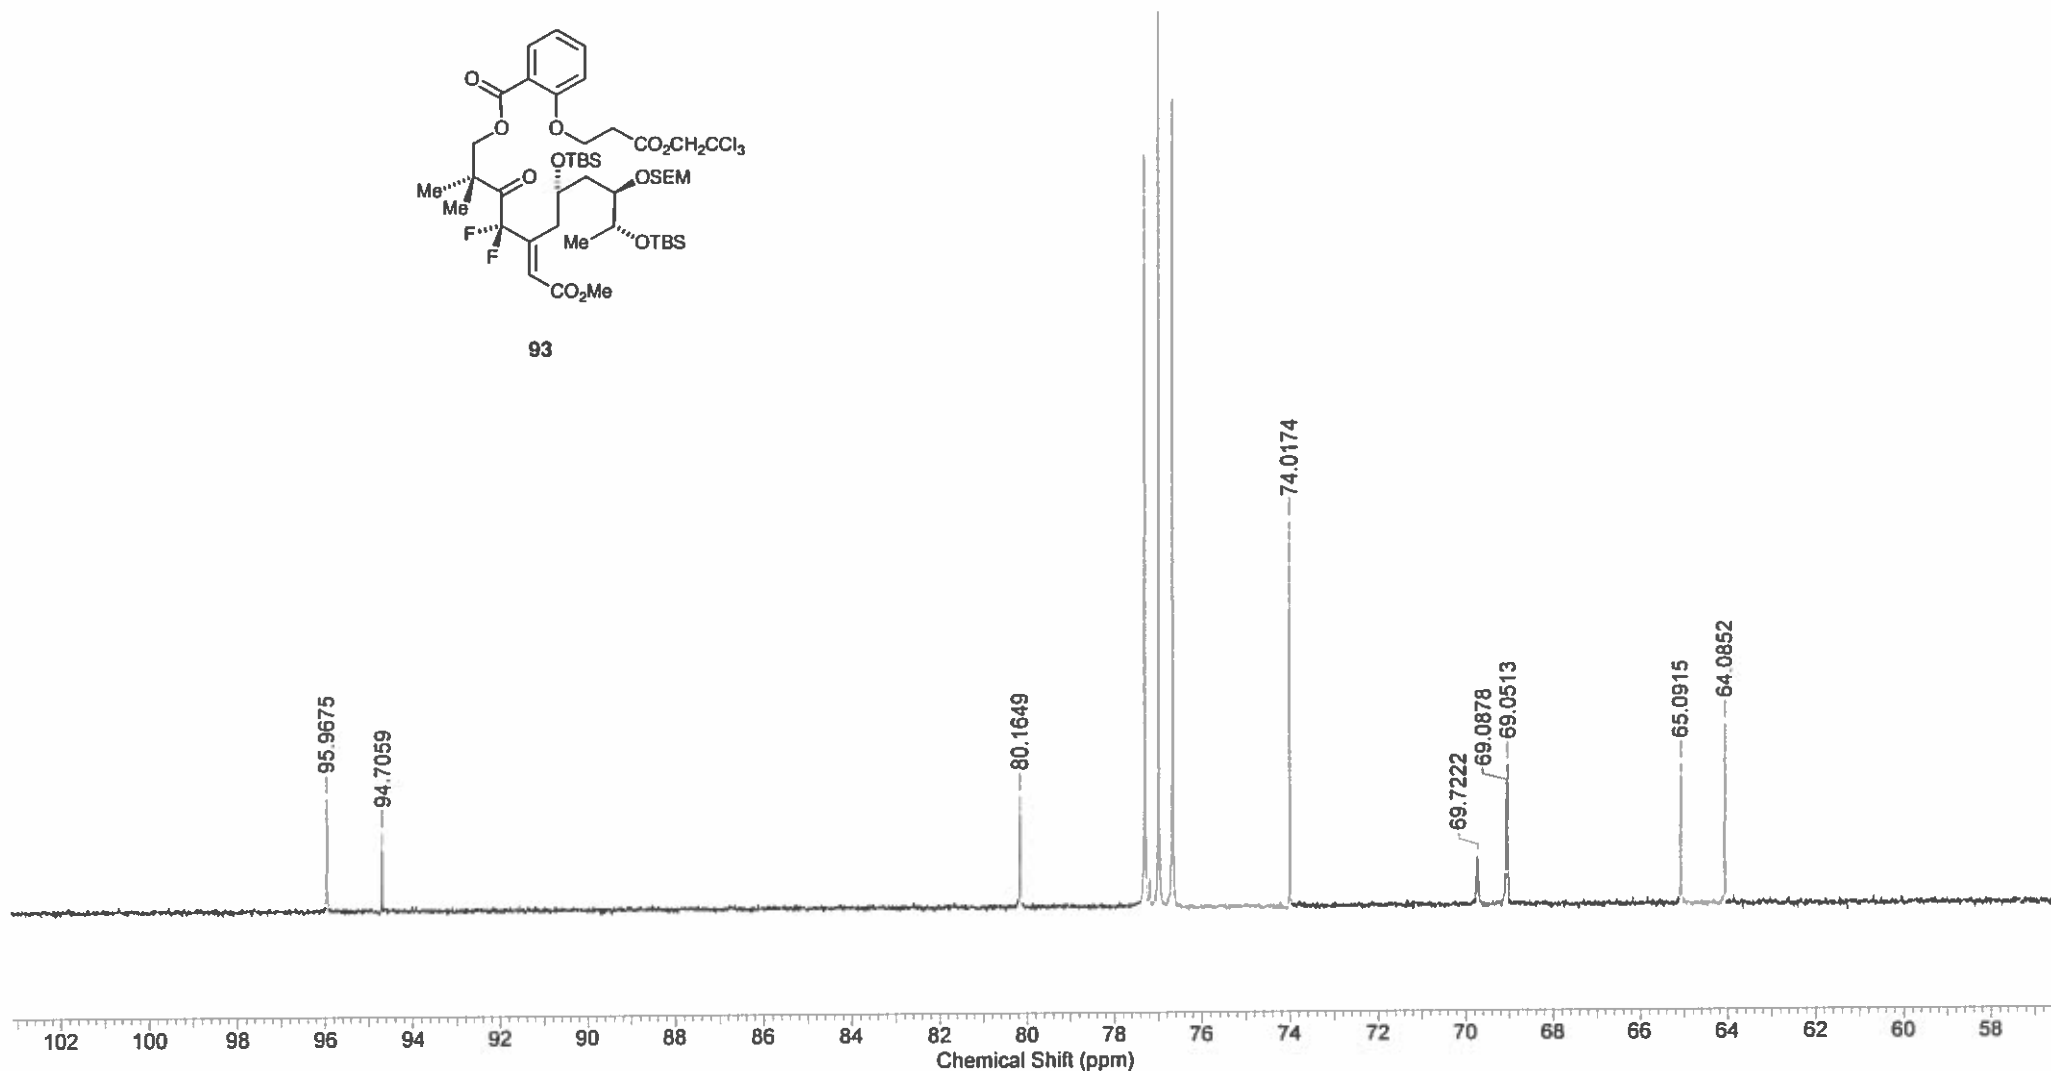

This report was created by ACD/NMR Processor Academic Edition. For more information go to [www.acdlabs.com/nmrproc/](http://www.acdlabs.com/nmrproc/)

This report was created by ACD/NMR Processor Academic Edition. For more information go to [www.acdlabs.com/nmr/proc/](http://www.acdlabs.com/nmr/proc/)

|                        |                                                                                                           |                        |                                                                   |                      |            |                       |          |
|------------------------|-----------------------------------------------------------------------------------------------------------|------------------------|-------------------------------------------------------------------|----------------------|------------|-----------------------|----------|
| Acquisition Time (sec) | 1.3631                                                                                                    | Comment                | EJT-PRM189 prod mCARBON_A CDCl3 (e:\bruk400cdata\2015\Aug) ejt 54 |                      |            |                       |          |
| Date                   | 20 Aug 2015 16:00:16                                                                                      | Date Stamp             | 20 Aug 2015 16:00:16                                              |                      |            |                       |          |
| File Name              | \\ss7a.ds.man.ac.uk\vol5\vol3\users\snmrdata\bruk400cdata\2015\Aug\data\ejt\nmr\2015-08-20-ejt-54\111\fid |                        |                                                                   |                      |            | Frequency (MHz)       | 100.60   |
| Nucleus                | 13C                                                                                                       | Number of Transients   | 256                                                               | Origin               | spect      | Original Points Count | 32768    |
| Owner                  | nmrsu                                                                                                     | Points Count           | 32768                                                             | Pulse Sequence       | zgpg30     | Receiver Gain         | 71.80    |
| SW(cyclical) (Hz)      | 24038.46                                                                                                  | Solvent                | CHLOROFORM-d                                                      | Spectrum Offset (Hz) | 10049.8672 | Spectrum Type         | STANDARD |
| Sweep Width (Hz)       | 24037.73                                                                                                  | Temperature (degree C) | 18.046                                                            |                      |            |                       |          |

PRM189-CNMR.esp

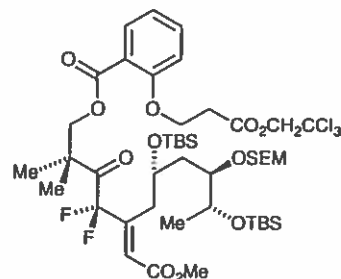

93

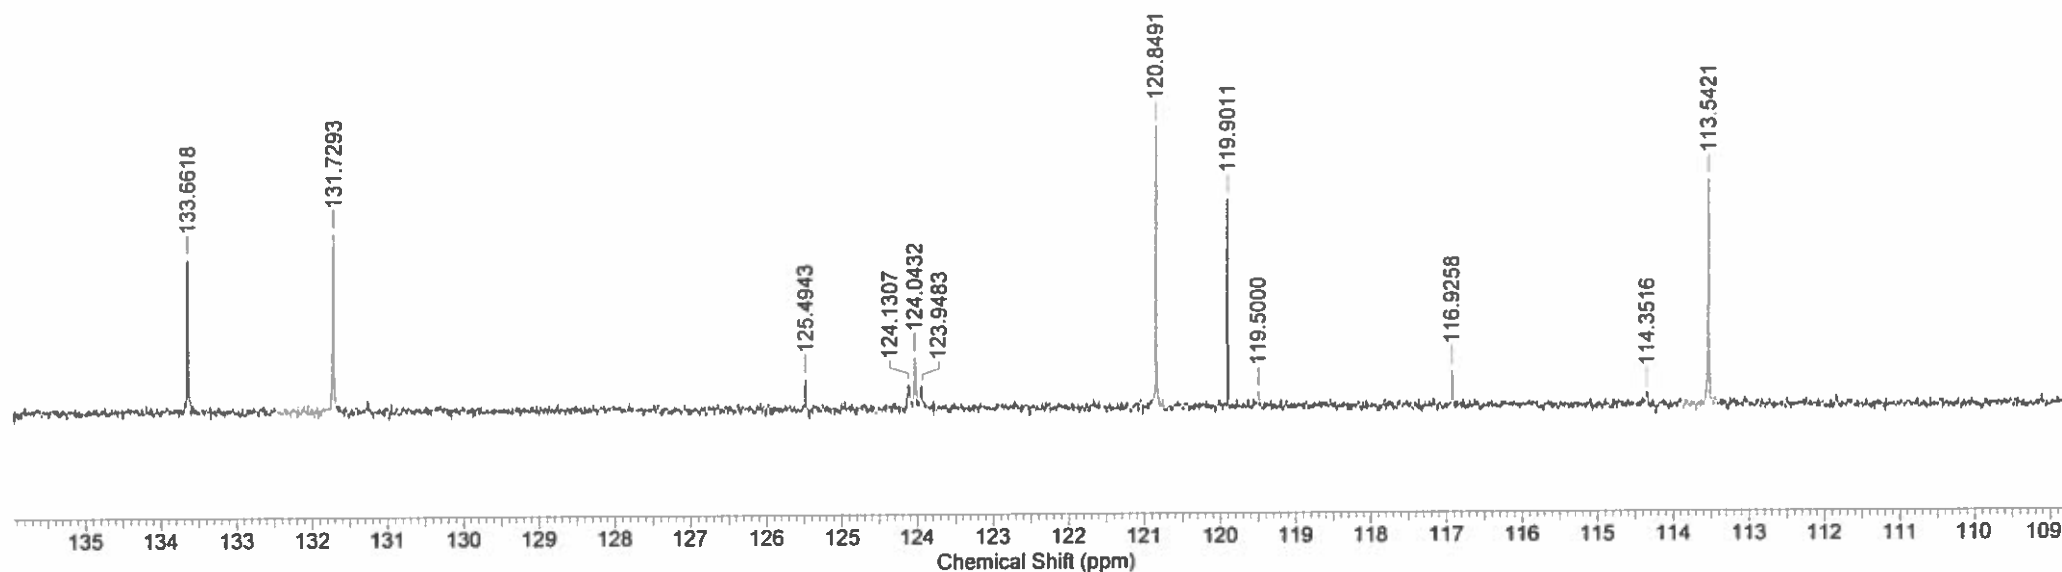

This report was created by ACD/NMR Processor Academic Edition. For more information go to [www.acdlabs.com/nmrproc/](http://www.acdlabs.com/nmrproc/)

|                        |                                                                                                         |                        |                                                                   |                      |            |
|------------------------|---------------------------------------------------------------------------------------------------------|------------------------|-------------------------------------------------------------------|----------------------|------------|
| Acquisition Time (sec) | 1.3631                                                                                                  | Comment                | EJT-PRM189 prod mCARBON_A CDCl3 {e:\bruk400cdata\2015\Aug} ejt 54 |                      |            |
| Date                   | 20 Aug 2015 16:00:16                                                                                    | Date Stamp             | 20 Aug 2015 16:00:16                                              |                      |            |
| File Name              | \ss7a.ds.man.ac.uk\vol5\vol3\users\snmrdata\bruk400cdata\2015\Aug\data\ejt\nmr\2015-08-20-ejt-54\11\fid |                        |                                                                   | Frequency (MHz)      | 100.60     |
| Nucleus                | 13C                                                                                                     | Number of Transients   | 256                                                               | Origin               | spect      |
| Owner                  | nmrsu                                                                                                   | Points Count           | 32768                                                             | Pulse Sequence       | zgpg30     |
| SW(cyclical) (Hz)      | 24038.46                                                                                                | Solvent                | CHLOROFORM-d                                                      | Receiver Gain        | 71.80      |
| Sweep Width (Hz)       | 24037.73                                                                                                | Temperature (degree C) | 18.046                                                            | Spectrum Offset (Hz) | 10049.8672 |
|                        |                                                                                                         |                        |                                                                   | Spectrum Type        | STANDARD   |

PRM189-CNMR.esp

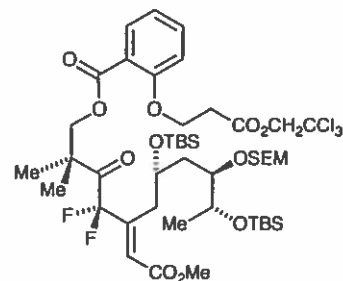

93

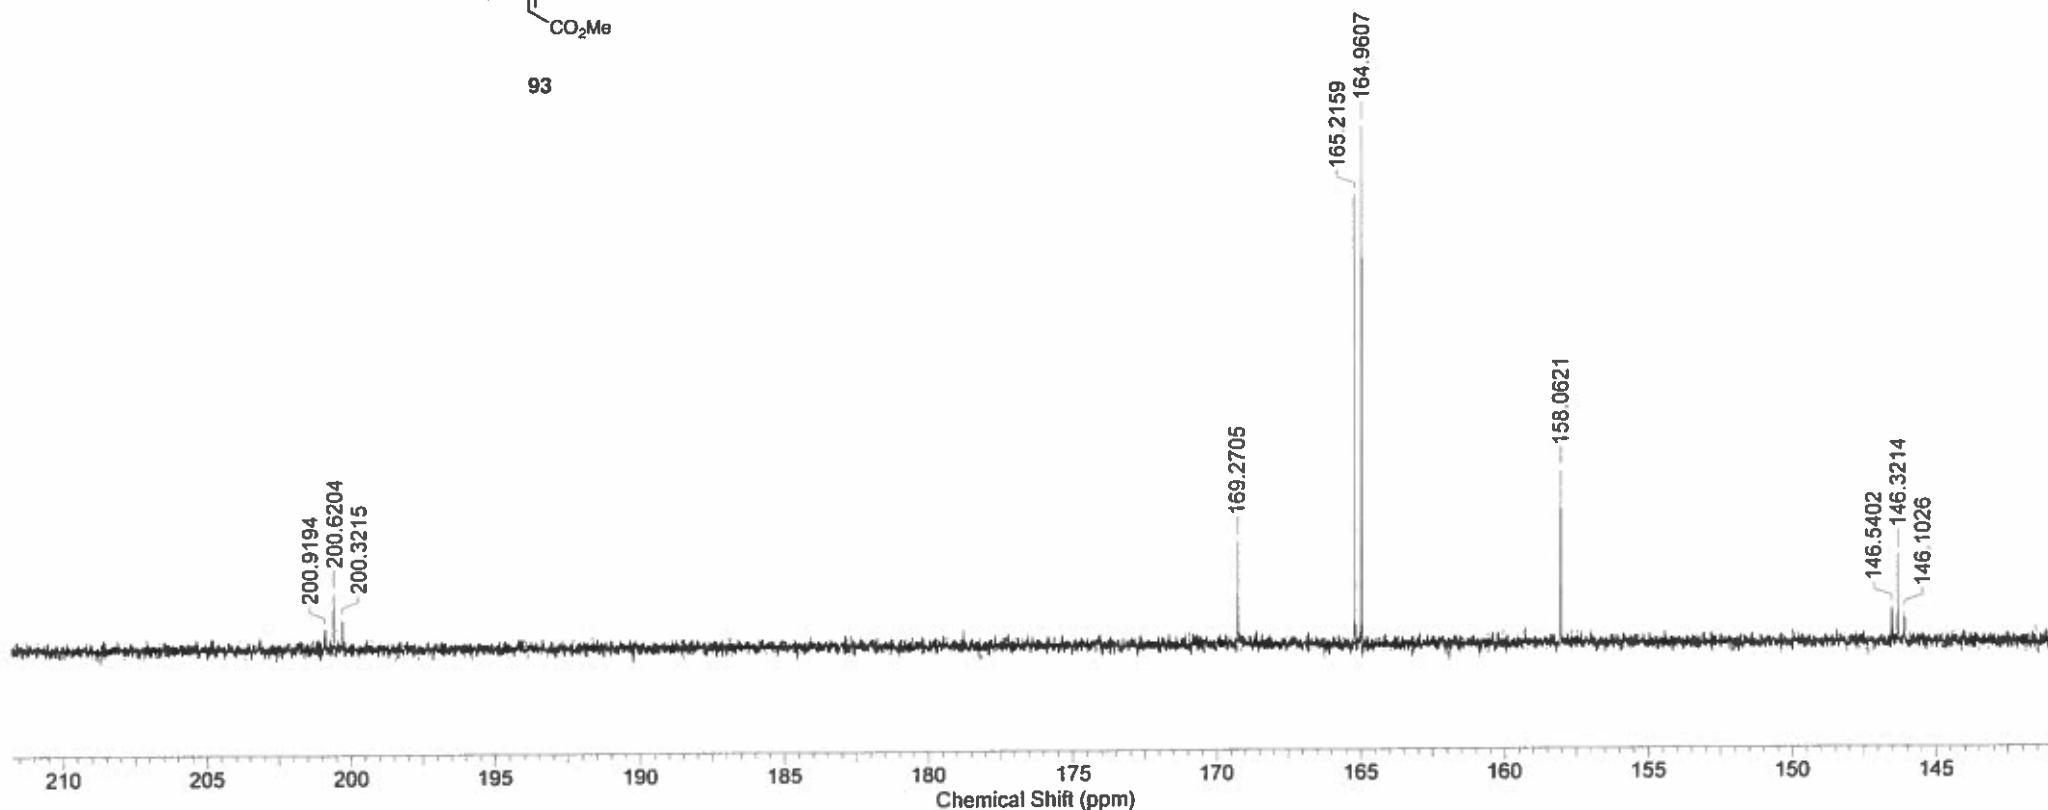

EJT-PRM189 f3-15 16mg

mF19\_cryo\_zgbs CDCl3 {e:\bruk400cdata\2015\Jul}\ejt-32

-100.8  
-101.8  
-101.9  
-101.9  
-101.8  
-101.7  
-102.2

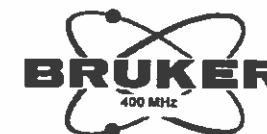

Current Data Parameters  
NAME 2015-08-05-ejt-32  
EXPNO 11  
PROCNO 1

F2 - Acquisition Parameters  
Date\_ 20150805  
Time 12.50  
INSTRUM spect  
PROBHD 5 mm CPPBBO BB  
PULPROG zgbs  
TD 131072  
SOLVENT CDCl3  
NS 16  
DS 4  
SWH 89285.711 Hz  
FIDRES 0.681196 Hz  
AQ 0.7340032 sec  
RG 7.12  
DW 5.600 usec  
DE 18.83 usec  
TE 291.2 K  
D1 1.00000000 sec  
TD0 1

----- CHANNEL f1 -----  
SFO1 376.4042649 MHz  
NUC1 19F  
P1 15.00 usec  
P2 30.00 usec  
PLW1 3.79999995 W

F2 - Processing parameters  
SI 262144  
SF 376.4419098 MHz  
WDW EM  
SSB 0  
LB 0.30 Hz  
GB 0  
PC 2.00

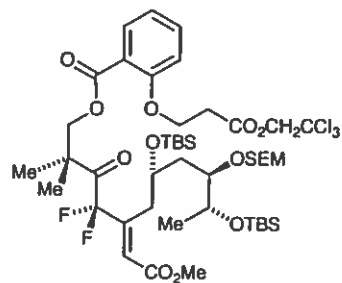

93

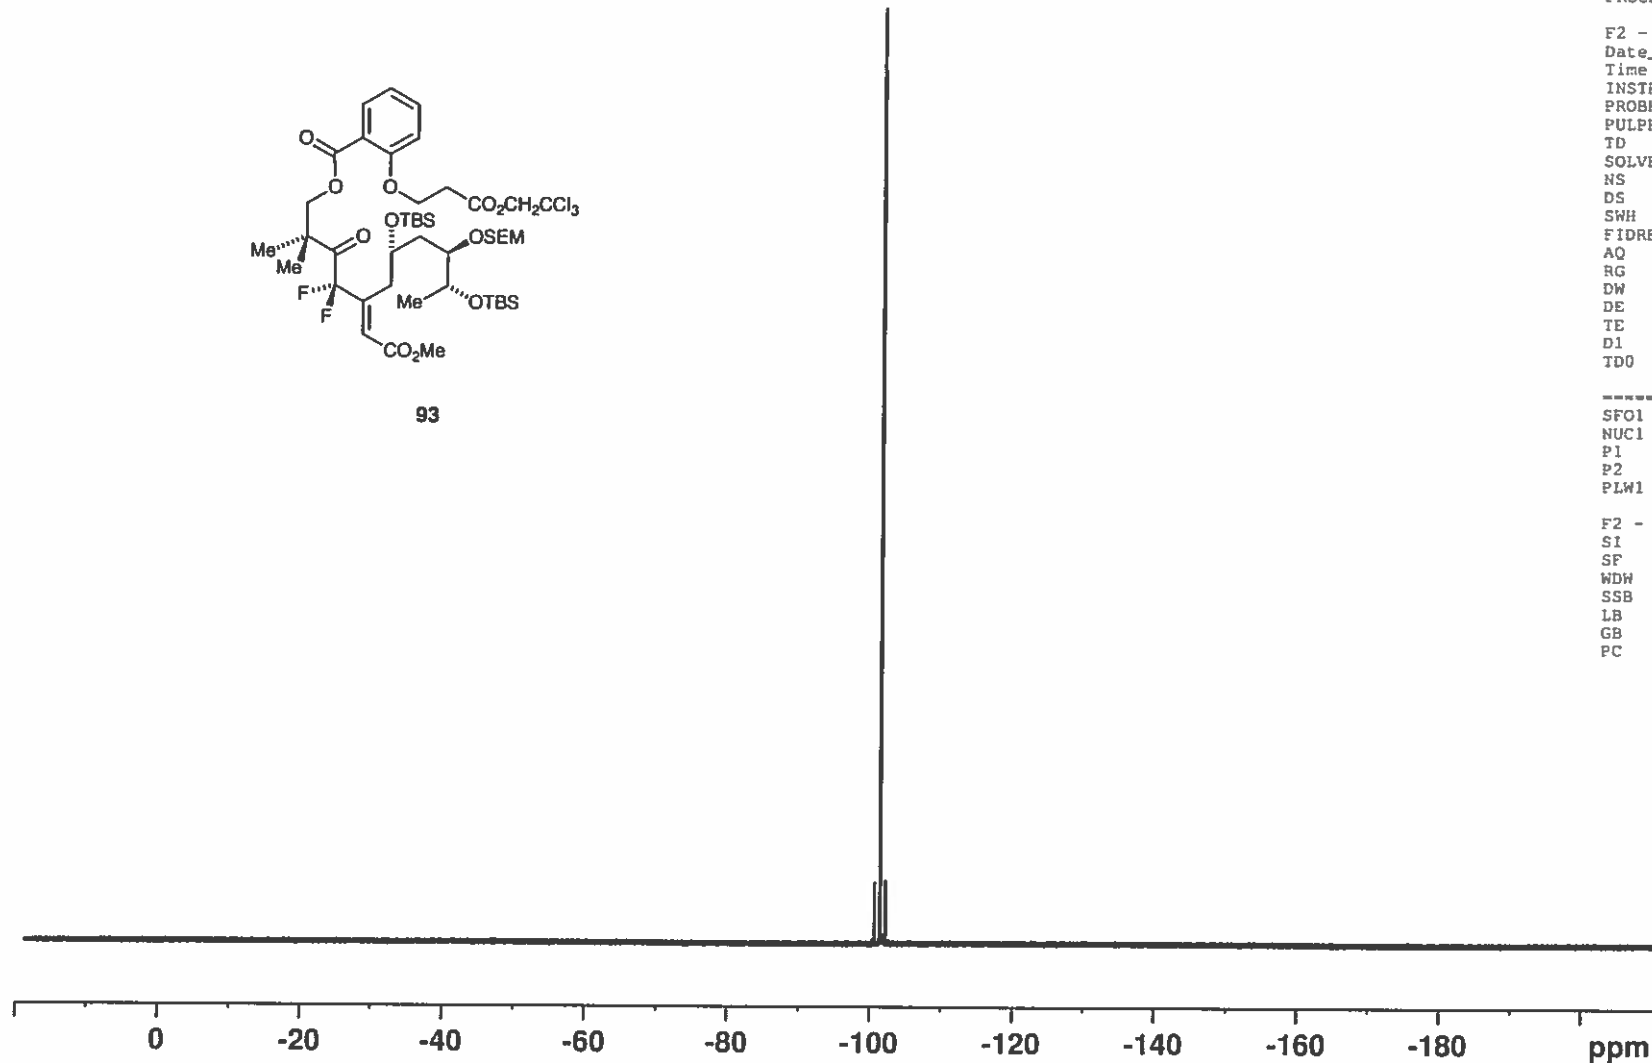

This report was created by ACD/NMR Processor Academic Edition. For more information go to [www.acdlabs.com/nmrproc/](http://www.acdlabs.com/nmrproc/)

|                        |                                                                                                                 |                        |                                                                       |                      |           |
|------------------------|-----------------------------------------------------------------------------------------------------------------|------------------------|-----------------------------------------------------------------------|----------------------|-----------|
| Acquisition Time (sec) | 3.1719                                                                                                          | Comment                | EJT-PRM190 f7-19 11mg mPROTON CDCl3 (E:\bruk500adata\2015\Aug)\ejt 43 |                      |           |
| Date                   | 13 Aug 2015 14:17:52                                                                                            | Date Stamp             | 13 Aug 2015 14:17:52                                                  |                      |           |
| File Name              | \\ss7a.ds.man.ac.uk\vol5\vol3\users\snmrdata\bruk500adata\2015\Aug\data\ejt\nmr\2015-08-13-ejt-43\10\PDATA\111r |                        |                                                                       | Frequency (MHz)      | 500.13    |
| Nucleus                | 1H                                                                                                              | Number of Transients   | 16                                                                    | Origin               | spect     |
| Owner                  | nmrsu                                                                                                           | Points Count           | 32768                                                                 | Pulse Sequence       | zg30      |
| SW (cyclical) (Hz)     | 10330.58                                                                                                        | Solvent                | CHLOROFORM-d                                                          | Spectrum Offset (Hz) | 3081.2380 |
| Sweep Width (Hz)       | 10330.26                                                                                                        | Temperature (degree C) | 25.000                                                                | Spectrum Type        | STANDARD  |

PRM190-HNMR.esp

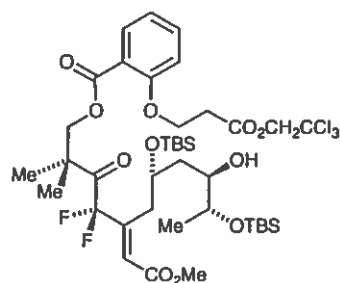

94

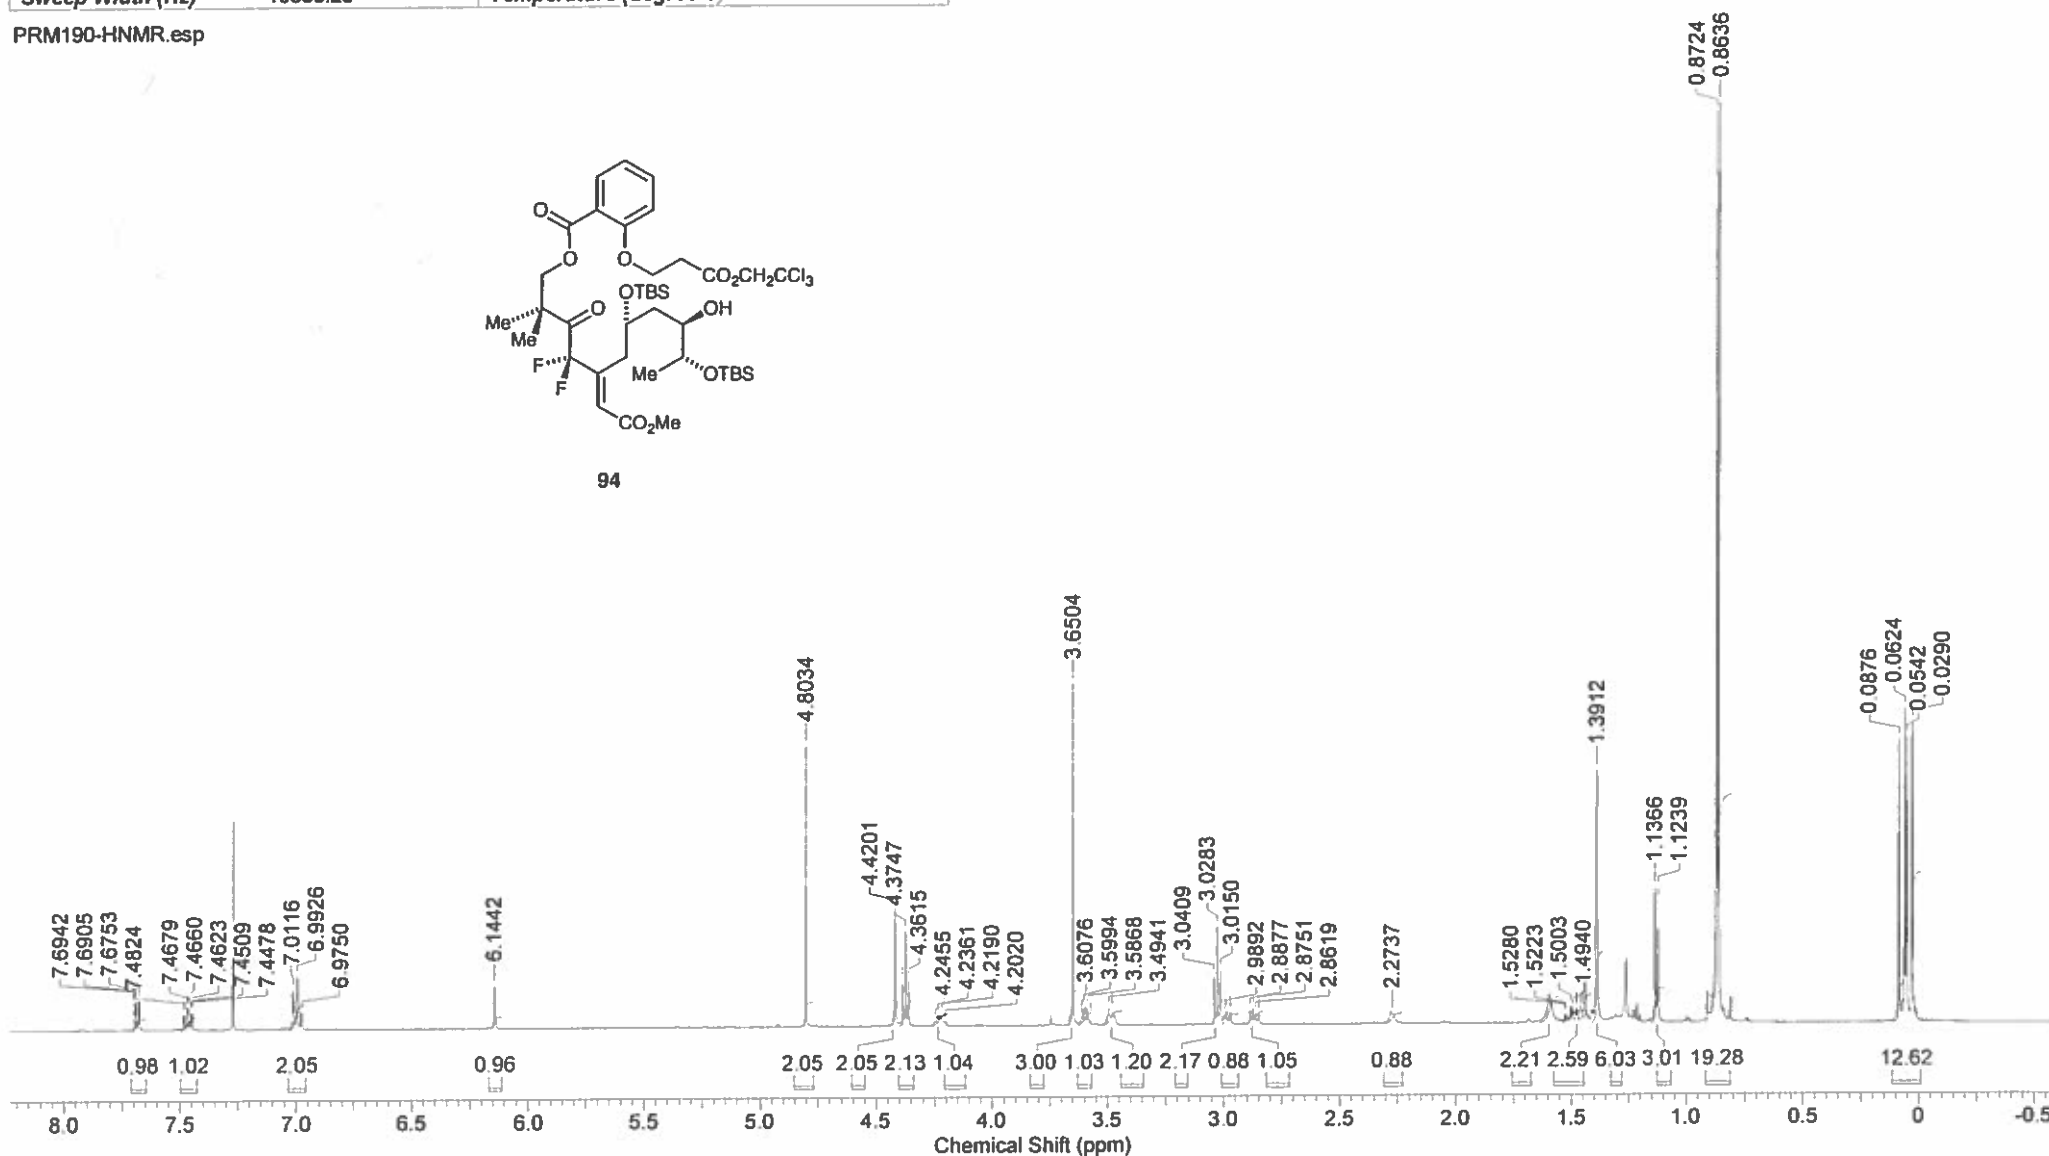

This report was created by ACD/NMR Processor Academic Edition. For more information go to [www.acdlabs.com/nmrproc/](http://www.acdlabs.com/nmrproc/)

|                        |                                                                                                         |                        |                                                                         |                      |            |                       |          |
|------------------------|---------------------------------------------------------------------------------------------------------|------------------------|-------------------------------------------------------------------------|----------------------|------------|-----------------------|----------|
| Acquisition Time (sec) | 1.3631                                                                                                  | Comment                | EJT-PRM190 f13-46 54mg mCARBON_B CDCI3 (e:\bruk400\data\2015\Aug) ejt 6 |                      |            |                       |          |
| Date                   | 21 Aug 2015 22:58:24                                                                                    |                        | Date Stamp                                                              | 21 Aug 2015 22:58:24 |            |                       |          |
| File Name              | \\ss7a.ds.man.ac.uk\vol5\vol3\users\snmr\data\bruk400\data\2015\Aug\data\ejt\nmr\2015-08-21-ejt-6\21vid |                        | Frequency (MHz)                                                         | 100.60               |            |                       |          |
| Nucleus                | 13C                                                                                                     | Number of Transients   | 1000                                                                    | Origin               | spect      | Original Points Count | 32768    |
| Owner                  | nmrsu                                                                                                   | Points Count           | 32768                                                                   | Pulse Sequence       | zgpg30     | Receiver Gain         | 45.20    |
| SW(cyclical) (Hz)      | 24038.46                                                                                                | Solvent                | CHLOROFORM-d                                                            | Spectrum Offset (Hz) | 10049.8789 | Spectrum Type         | STANDARD |
| Sweep Width (Hz)       | 24037.73                                                                                                | Temperature (degree C) | 18.170                                                                  |                      |            |                       |          |

PRM190-CNMR.esp

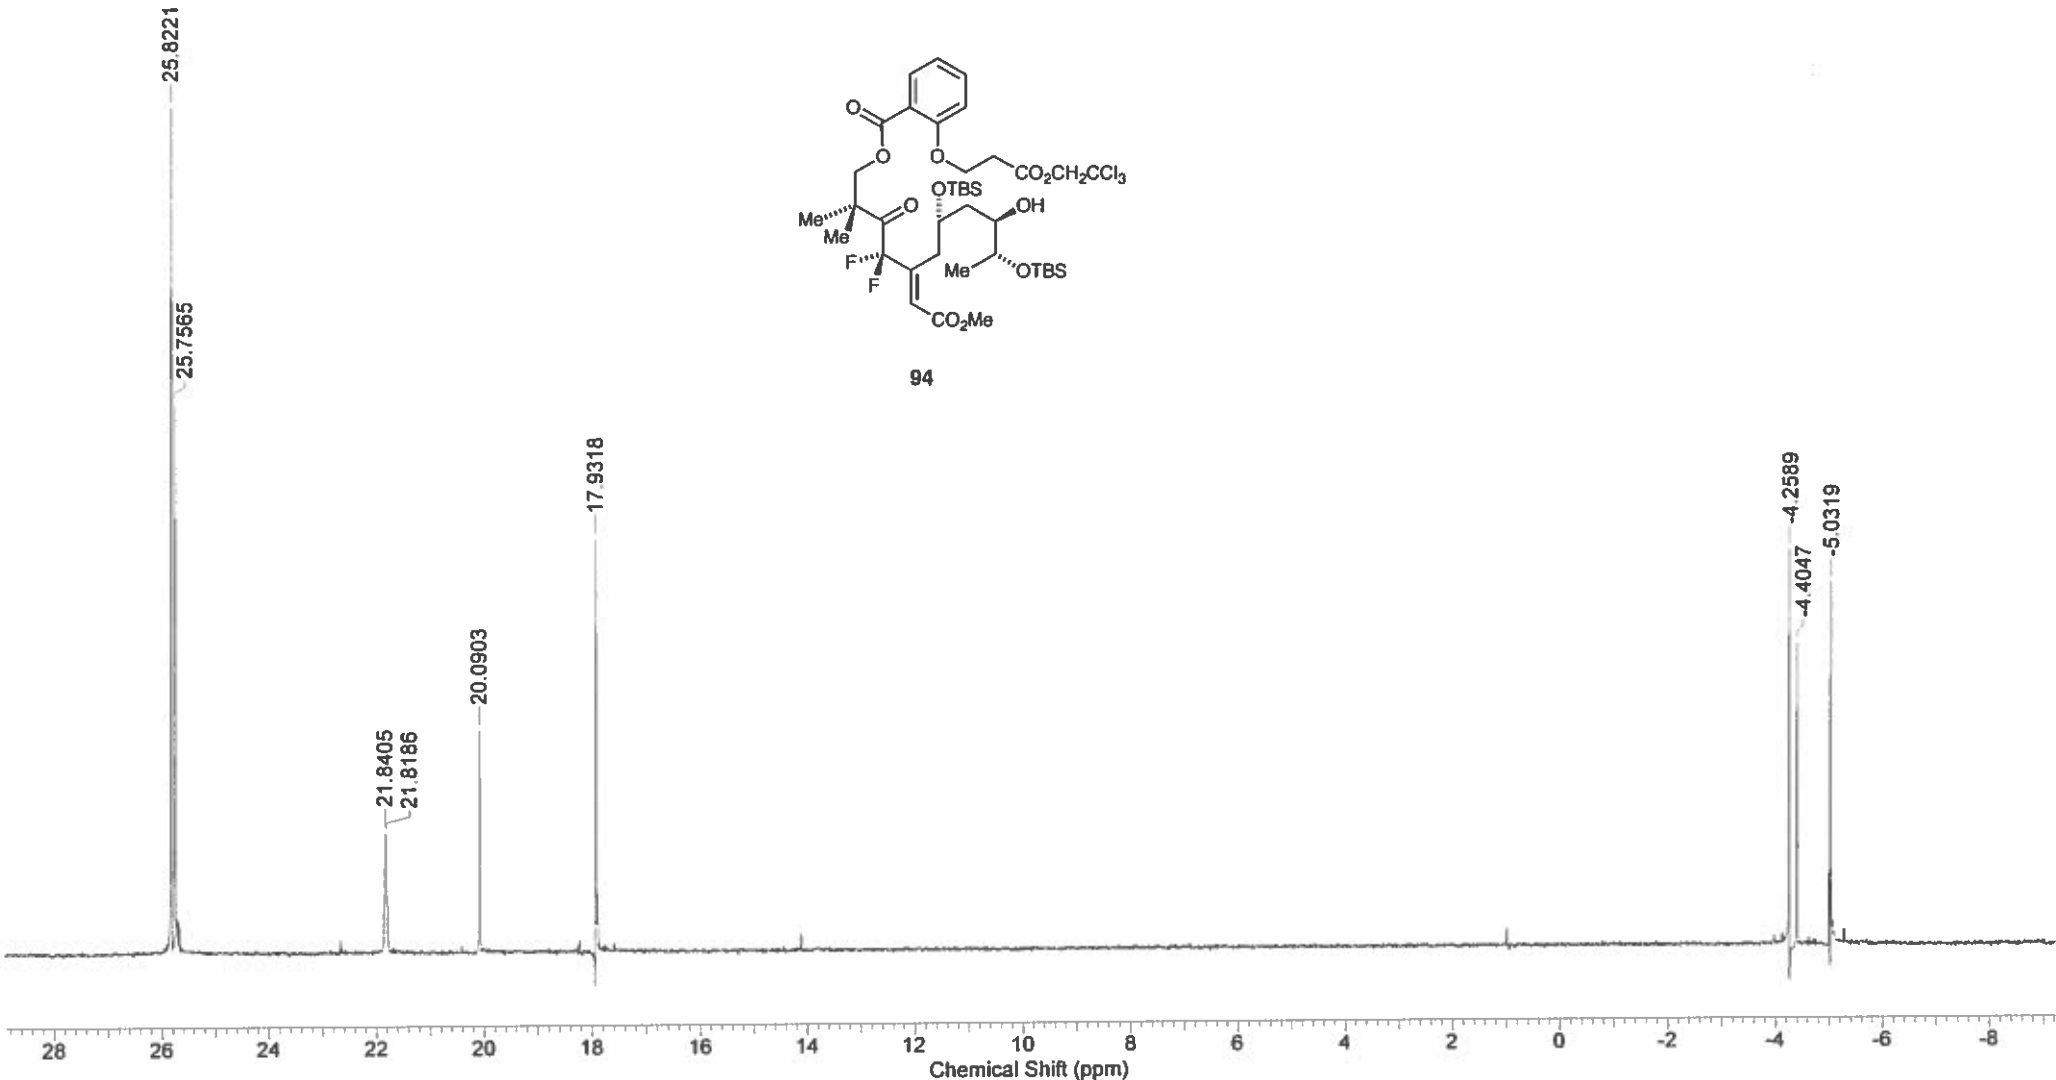

This report was created by ACD/NMR Processor Academic Edition. For more information go to [www.acdlabs.com/nmrproc/](http://www.acdlabs.com/nmrproc/)

|                        |                                                                                                    |                        |                                                                         |                      |                 |                       |          |
|------------------------|----------------------------------------------------------------------------------------------------|------------------------|-------------------------------------------------------------------------|----------------------|-----------------|-----------------------|----------|
| Acquisition Time (sec) | 1.3631                                                                                             | Comment                | EJT-PRM190 f13-46 54mg mCARBON_B CDCl3 (e:\bruk400cdata\2015\Aug) ejt 6 |                      |                 |                       |          |
| Date                   | 21 Aug 2015 22:58:24                                                                               | Date Stamp             | 21 Aug 2015 22:58:24                                                    |                      |                 |                       |          |
| File Name              | \\ss7a.ds.man.ac.uk\vol5\users\snmrdata\bruk400cdata\2015\Aug\data\ejt\nmr\2015-08-21-ejt-6\21\fid |                        |                                                                         |                      | Frequency (MHz) | 100.60                |          |
| Nucleus                | 13C                                                                                                | Number of Transients   | 1000                                                                    | Origin               | spect           | Original Points Count | 32768    |
| Owner                  | nmsu                                                                                               | Points Count           | 32768                                                                   | Pulse Sequence       | zgpg30          | Receiver Gain         | 45.20    |
| SW(cyclical) (Hz)      | 24038.46                                                                                           | Solvent                | CHLOROFORM-d                                                            | Spectrum Offset (Hz) | 10049.8789      | Spectrum Type         | STANDARD |
| Sweep Width (Hz)       | 24037.73                                                                                           | Temperature (degree C) | 18.170                                                                  |                      |                 |                       |          |

PRM190-CNMR.esp

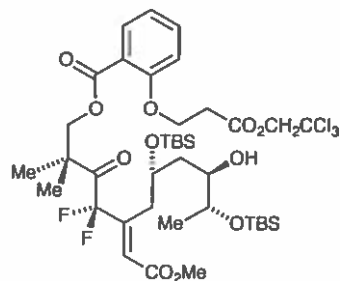

94

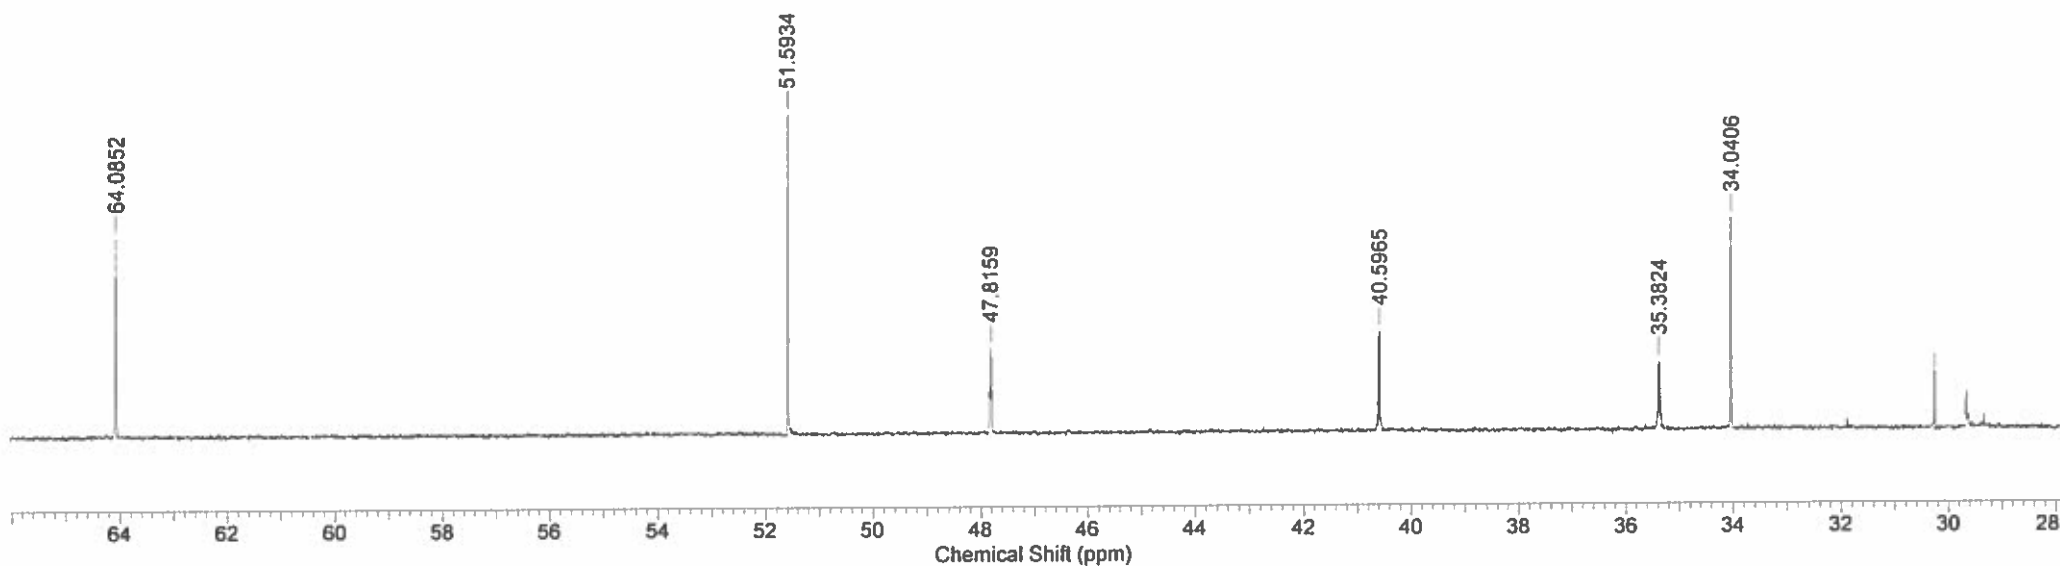

This report was created by ACD/NMR Processor Academic Edition. For more information go to [www.acdlabs.com/nmrproc/](http://www.acdlabs.com/nmrproc/)

|                        |                                                                                                         |                        |                                                                         |                      |            |
|------------------------|---------------------------------------------------------------------------------------------------------|------------------------|-------------------------------------------------------------------------|----------------------|------------|
| Acquisition Time (sec) | 1.3631                                                                                                  | Comment                | EJT-PRM190 f13-46 54mg mCARBON B CDCl3 (e:\bruk400cdata\2015\Aug) ejt 6 |                      |            |
| Date                   | 21 Aug 2015 22:58:24                                                                                    | Date Stamp             | 21 Aug 2015 22:58:24                                                    |                      |            |
| File Name              | \\ss7a.ds.man.ac.uk\vol5\vol3\users\snmrdata\bruk400cdata\2015\Aug\data\ejt\nmr\2015-08-21-ejt-6\21\fid | Frequency (MHz)        | 100.60                                                                  |                      |            |
| Nucleus                | 13C                                                                                                     | Number of Transients   | 1000                                                                    | Origin               | spect      |
| Owner                  | nmsu                                                                                                    | Points Count           | 32768                                                                   | Pulse Sequence       | zgpg30     |
| SW(cyclical) (Hz)      | 24038.46                                                                                                | Solvent                | CHLOROFORM-d                                                            | Receiver Gain        | 45.20      |
| Sweep Width (Hz)       | 24037.73                                                                                                | Temperature (degree C) | 18.170                                                                  | Spectrum Offset (Hz) | 10049.8789 |
|                        |                                                                                                         |                        |                                                                         | Spectrum Type        | STANDARD   |

PRM190-CNMR.esp

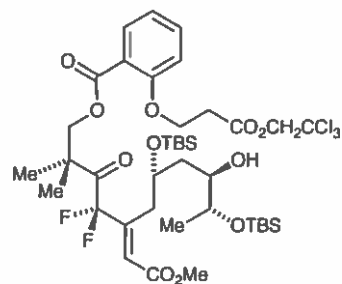

94

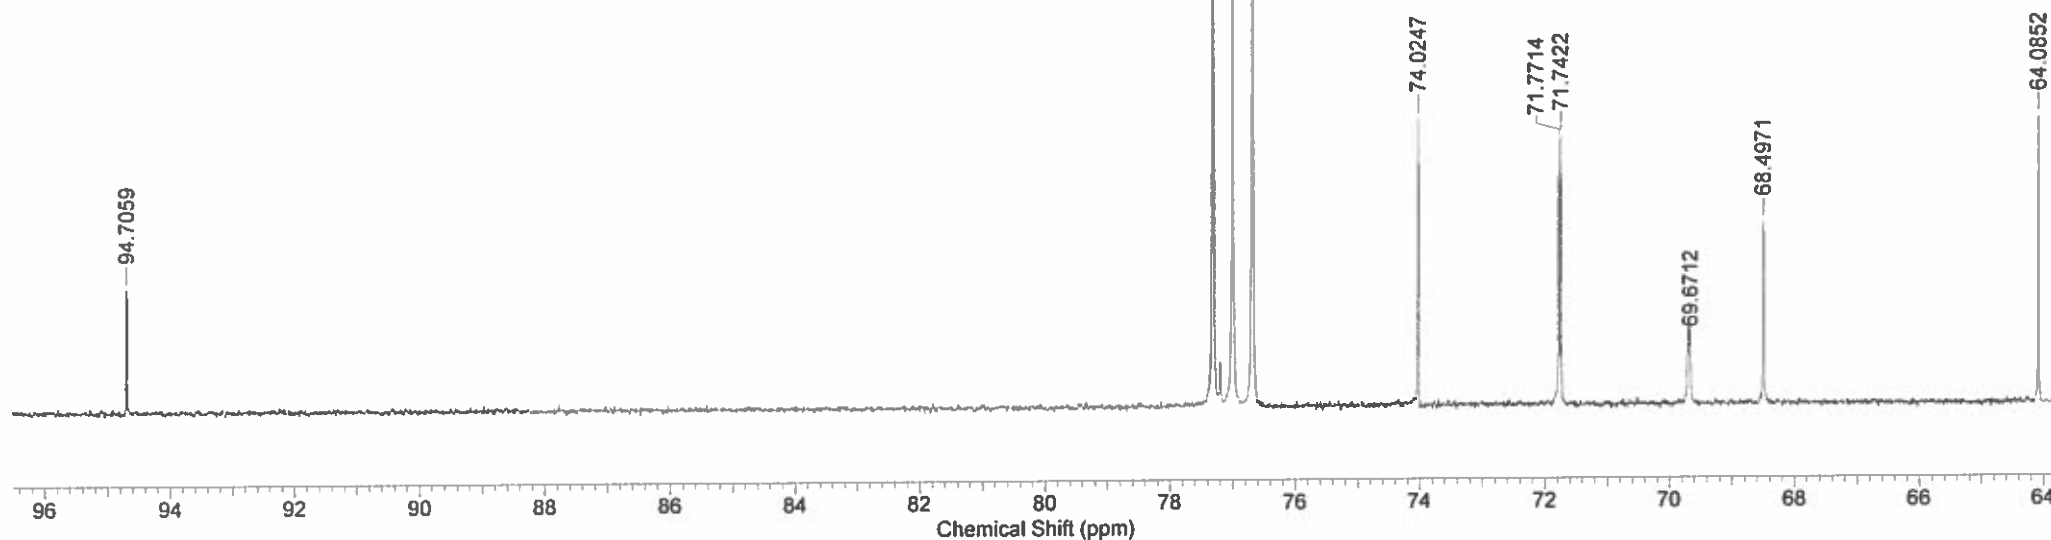



This report was created by ACD/NMR Processor Academic Edition. For more information go to [www.acdlabs.com/nmrproc/](http://www.acdlabs.com/nmrproc/)

|                        |                                                                                                       |                        |                                                                         |                      |            |
|------------------------|-------------------------------------------------------------------------------------------------------|------------------------|-------------------------------------------------------------------------|----------------------|------------|
| Acquisition Time (sec) | 1.3631                                                                                                | Comment                | EJT-PRM190 f13-46 54mg mCARBON_B CDCl3 (e:\bruk400cdata\2015\Aug)\ejt 6 |                      |            |
| Date                   | 21 Aug 2015 22:58:24                                                                                  | Date Stamp             | 21 Aug 2015 22:58:24                                                    |                      |            |
| File Name              | \ss7a.ds.man.ac.uk\vol5\vol3\users\snmrdata\bruk400cdata\2015\Aug\data\ejt\nmr\2015-08-21-ejt-6\21fid |                        |                                                                         | Frequency (MHz)      | 100.60     |
| Nucleus                | 13C                                                                                                   | Number of Transients   | 1000                                                                    | Origin               | spect      |
| Owner                  | nmrsu                                                                                                 | Points Count           | 32768                                                                   | Pulse Sequence       | zgpg30     |
| SW(cyclical) (Hz)      | 24038.46                                                                                              | Solvent                | CHLOROFORM-d                                                            | Spectrum Offset (Hz) | 10049.8789 |
| Sweep Width (Hz)       | 24037.73                                                                                              | Temperature (degree C) | 18.170                                                                  | Spectrum Type        | STANDARD   |

PRM190-CNMR.esp

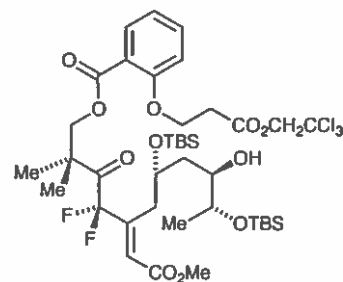

94

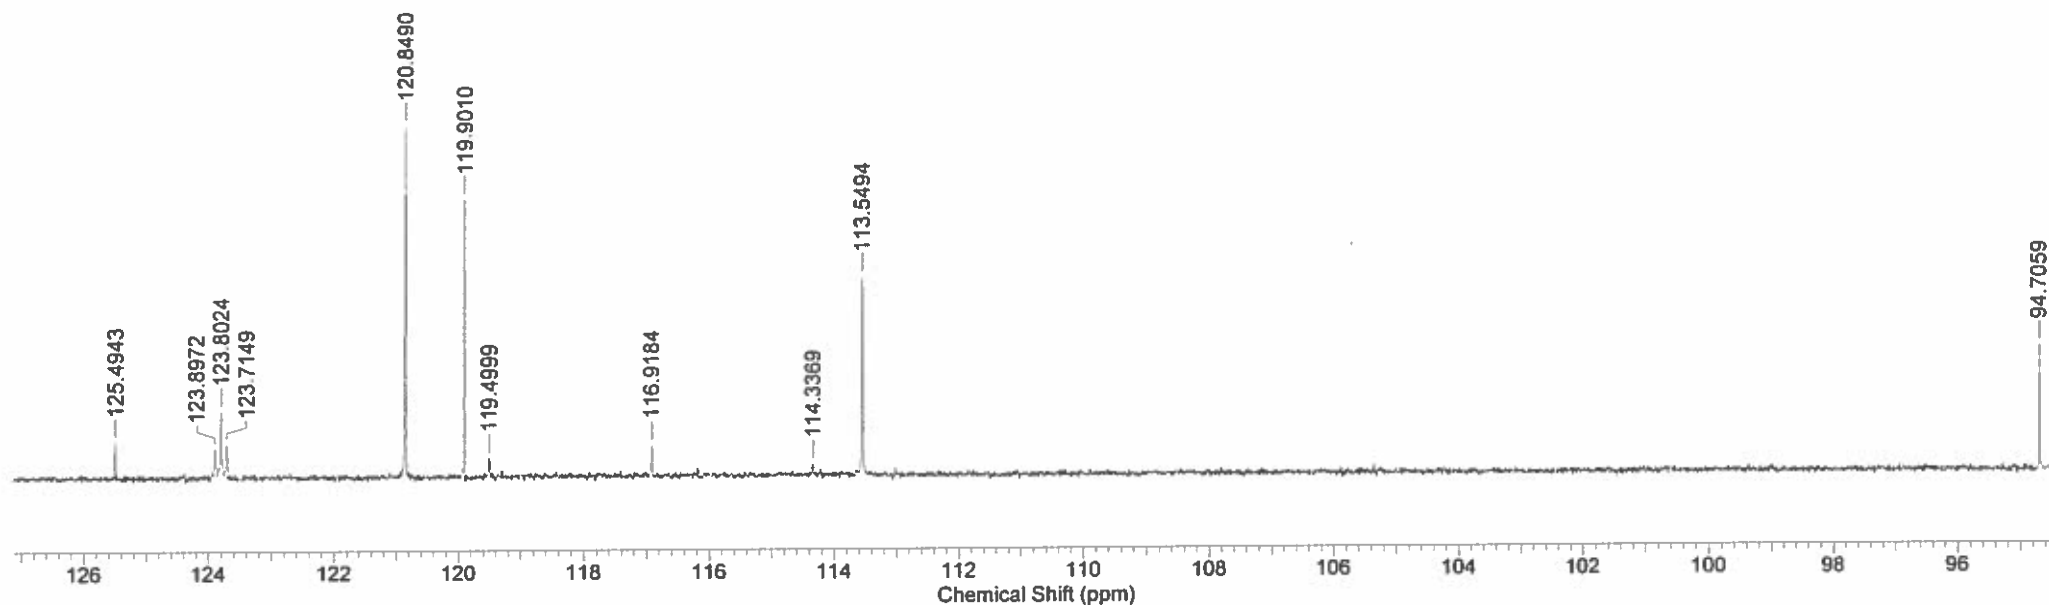

This report was created by ACD/NMR Processor Academic Edition. For more information go to [www.acdlabs.com/nmrproc/](http://www.acdlabs.com/nmrproc/)

|                        |                                                                                                         |                        |                                                                         |                      |            |
|------------------------|---------------------------------------------------------------------------------------------------------|------------------------|-------------------------------------------------------------------------|----------------------|------------|
| Acquisition Time (sec) | 1.3631                                                                                                  | Comment                | EJT-PRM190 f13-46 54mg mCARBON B CDCl3 (e:\bruk400cdata\2015\Aug) ejt 6 |                      |            |
| Date                   | 21 Aug 2015 22:58:24                                                                                    | Date Stamp             | 21 Aug 2015 22:58:24                                                    |                      |            |
| File Name              | \\ss7a.ds.man.ac.uk\vol5\vol3\users\snmrdata\bruk400cdata\2015\Aug\data\ejt\nmr\2015-08-21-ejt-6\21.fid |                        |                                                                         | Frequency (MHz)      | 100.60     |
| Nucleus                | 13C                                                                                                     | Number of Transients   | 1000                                                                    | Origin               | spect      |
| Owner                  | nmrsu                                                                                                   | Points Count           | 32768                                                                   | Pulse Sequence       | zgpg30     |
| SW(cyclical) (Hz)      | 24038.46                                                                                                | Solvent                | CHLOROFORM-d                                                            | Spectrum Offset (Hz) | 10049.8789 |
| Sweep Width (Hz)       | 24037.73                                                                                                | Temperature (degree C) | 18.170                                                                  | Receiver Gain        | 45.20      |
|                        |                                                                                                         |                        |                                                                         | Spectrum Type        | STANDARD   |

PRM190-CNMR.esp

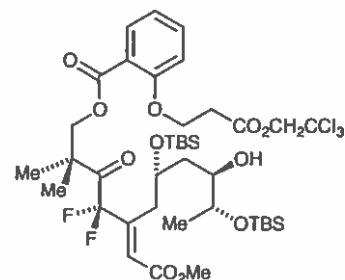

94

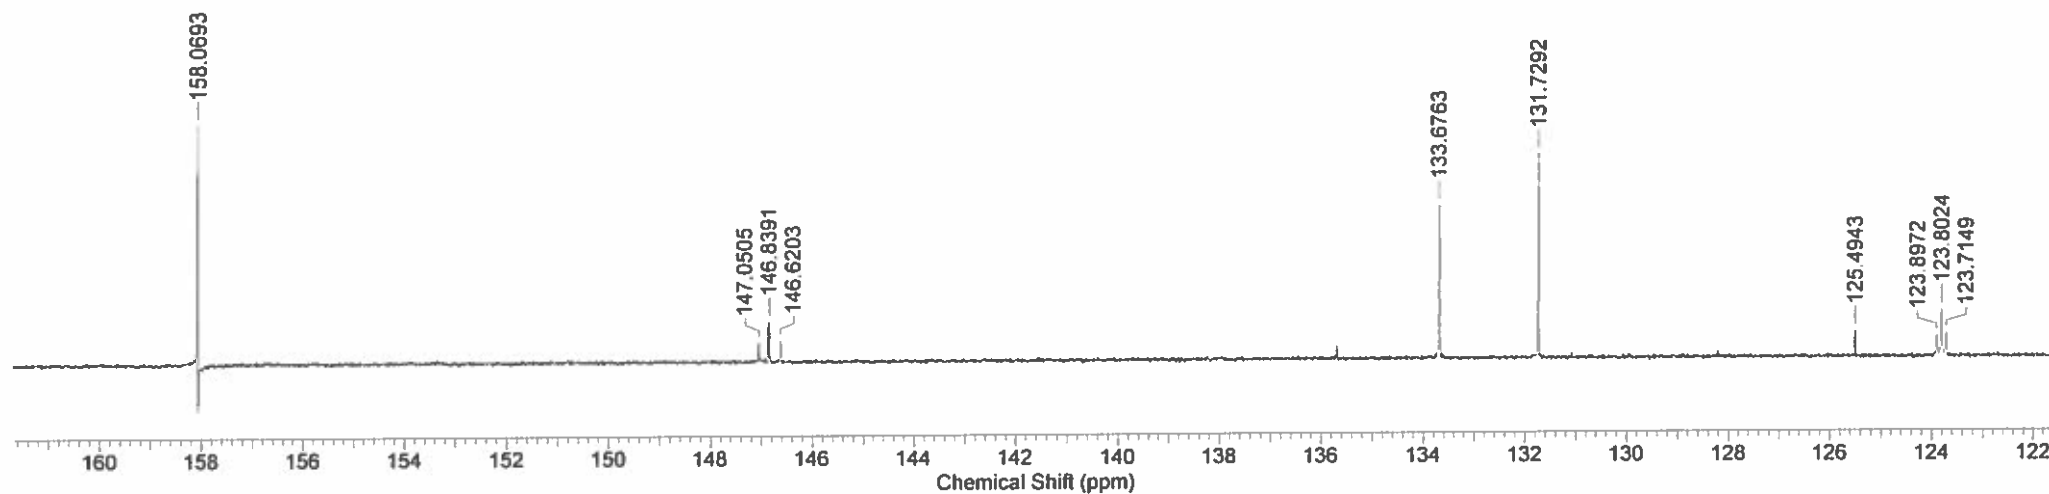

This report was created by ACD/NMR Processor Academic Edition. For more information go to [www.acdlabs.com/nmrproc/](http://www.acdlabs.com/nmrproc/)

|                        |                                                                                                        |                        |                                                                         |                      |            |
|------------------------|--------------------------------------------------------------------------------------------------------|------------------------|-------------------------------------------------------------------------|----------------------|------------|
| Acquisition Time (sec) | 1.3631                                                                                                 | Comment                | EJT-PRM190 f13-46 54mg mCARBON_B CDCl3 (e:\bruk400cdata\2015\Aug) ejt 6 |                      |            |
| Date                   | 21 Aug 2015 22:58:24                                                                                   | Date Stamp             | 21 Aug 2015 22:58:24                                                    |                      |            |
| File Name              | \\ss7a.ds.man.ac.uk\vol5\vol3\users\snmrdata\bruk400cdata\2015\Aug\data\ejt\nmr\2015-08-21-ejt-6\21fid | Frequency (MHz)        | 100.60                                                                  |                      |            |
| Nucleus                | 13C                                                                                                    | Number of Transients   | 1000                                                                    | Origin               | spect      |
| Owner                  | nmrsu                                                                                                  | Points Count           | 32768                                                                   | Pulse Sequence       | zgpg30     |
| SW(cyclical) (Hz)      | 24038.46                                                                                               | Solvent                | CHLOROFORM-d                                                            | Receiver Gain        | 45.20      |
| Sweep Width (Hz)       | 24037.73                                                                                               | Temperature (degree C) | 18.170                                                                  | Spectrum Offset (Hz) | 10049.8789 |
|                        |                                                                                                        |                        |                                                                         | Spectrum Type        | STANDARD   |

PRM190-CNMR.esp

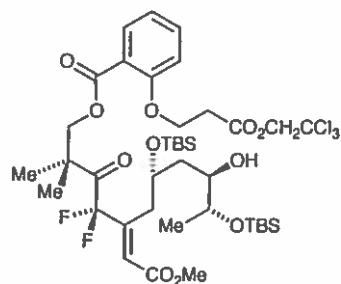

94

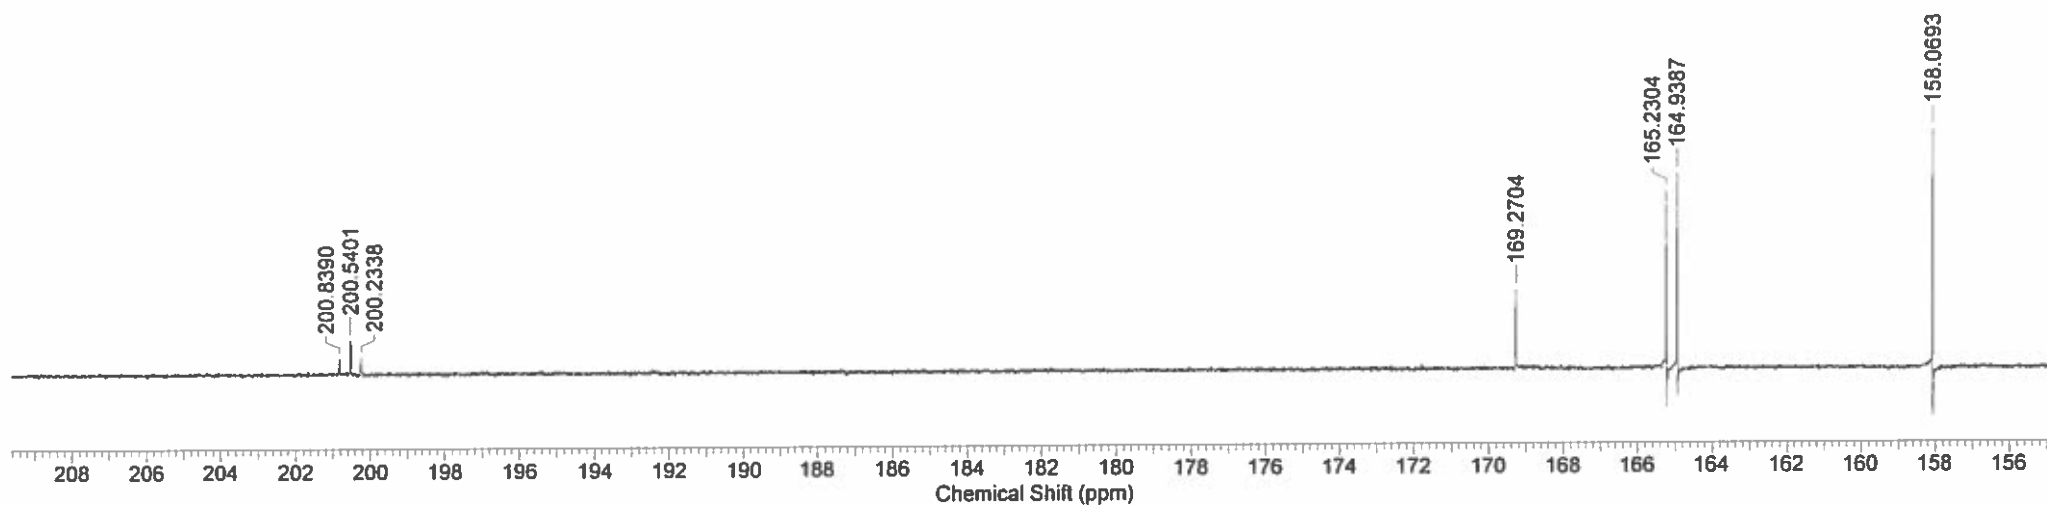

This report was created by ACD/NMR Processor Academic Edition. For more information go to [www.acdlabs.com/nmrproc/](http://www.acdlabs.com/nmrproc/)

|                        |                                                                                                         |                        |                                                                       |                      |             |
|------------------------|---------------------------------------------------------------------------------------------------------|------------------------|-----------------------------------------------------------------------|----------------------|-------------|
| Acquisition Time (sec) | 0.5767                                                                                                  | Comment                | EJT-PRM190 f7-19 11mg m19FCPD CDCI3 (E:\bruk500adata\2015\Aug) ejt 43 |                      |             |
| Date                   | 13 Aug 2015 14:32:48                                                                                    | Date Stamp             | 13 Aug 2015 14:32:48                                                  |                      |             |
| File Name              | \ss7a.ds.man.ac.uk\vol5\vol3\users\snmrdata\bruk500adata\2015\Aug\data\ejt\nmr\2015-08-13-ejt-43\13\fid |                        |                                                                       | Frequency (MHz)      | 470.59      |
| Nucleus                | 19F                                                                                                     | Number of Transients   | 16                                                                    | Origin               | spect       |
| Owner                  | nmrsu                                                                                                   | Points Count           | 65536                                                                 | Pulse Sequence       | zgfhigqn    |
| SW(cyclical) (Hz)      | 113636.37                                                                                               | Solvent                | CHLOROFORM-d                                                          | Spectrum Offset (Hz) | -47059.0234 |
| Sweep Width (Hz)       | 113634.63                                                                                               | Temperature (degree C) | 25.000                                                                | Receiver Gain        | 575.00      |
|                        |                                                                                                         |                        |                                                                       | Spectrum Type        | STANDARD    |

PRM190-F{H}NMR.esp

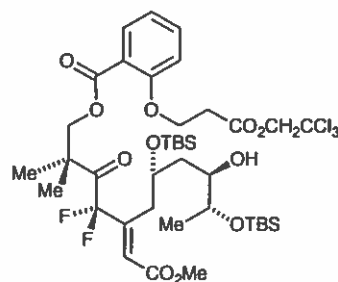

94

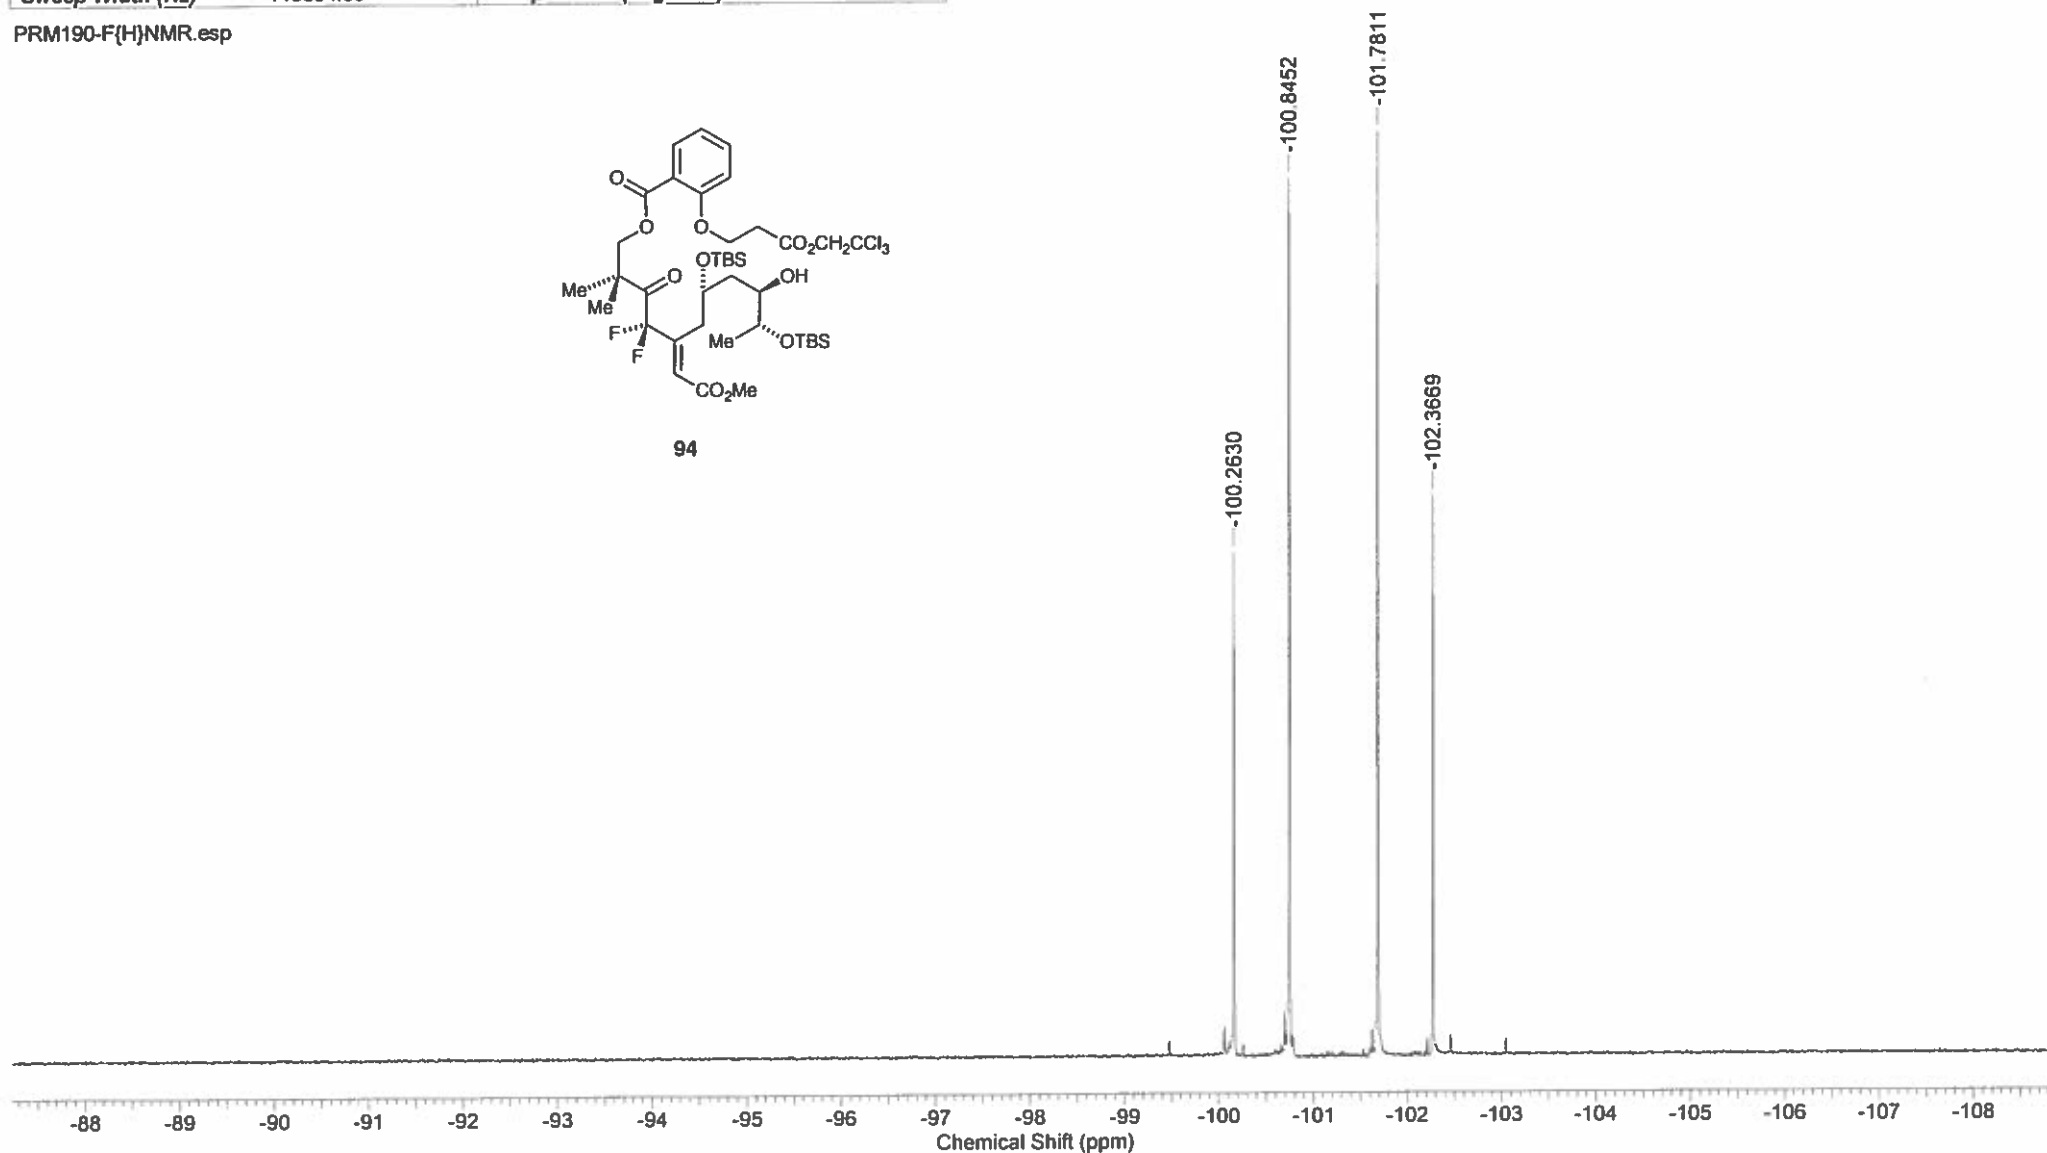

This report was created by ACD/NMR Processor Academic Edition. For more information go to [www.acdlabs.com/nmrproc/](http://www.acdlabs.com/nmrproc/)

|                        |                                                                                                               |                        |                                                                                    |                      |           |
|------------------------|---------------------------------------------------------------------------------------------------------------|------------------------|------------------------------------------------------------------------------------|----------------------|-----------|
| Acquisition Time (sec) | 4.0894                                                                                                        | Comment                | EJT-PRM193 f11-18 5mg chloroform mPROTON_A CDCl3 (e:\bruk400cdata\2015\Aug)\ejt 17 |                      |           |
| Date                   | 21 Aug 2015 15:56:00                                                                                          | Date Stamp             | 21 Aug 2015 15:56:00                                                               |                      |           |
| File Name              | \ss7a.ds.man.ac.uk\vol5\vol3\users\snmrdata\bruk400cdata\2015\Aug\data\ejt\nmr\2015-08-21-ejt-17\10\PDAT1\11r |                        |                                                                                    | Frequency (MHz)      | 400.07    |
| Nucleus                | 1H                                                                                                            | Number of Transients   | 4                                                                                  | Origin               | spect     |
| Owner                  | nmrsu                                                                                                         | Points Count           | 65536                                                                              | Pulse Sequence       | zg30      |
| SW(cyclical) (Hz)      | 8012.82                                                                                                       | Solvent                | CHLOROFORM-d                                                                       | Receiver Gain        | 203.00    |
| Sweep Width (Hz)       | 8012.70                                                                                                       | Temperature (degree C) | 18.371                                                                             | Spectrum Offset (Hz) | 1894.6188 |
|                        |                                                                                                               |                        |                                                                                    | Spectrum Type        | STANDARD  |

2015-08-21-ejt-17.010.001.1r.esp

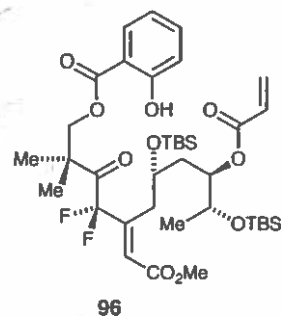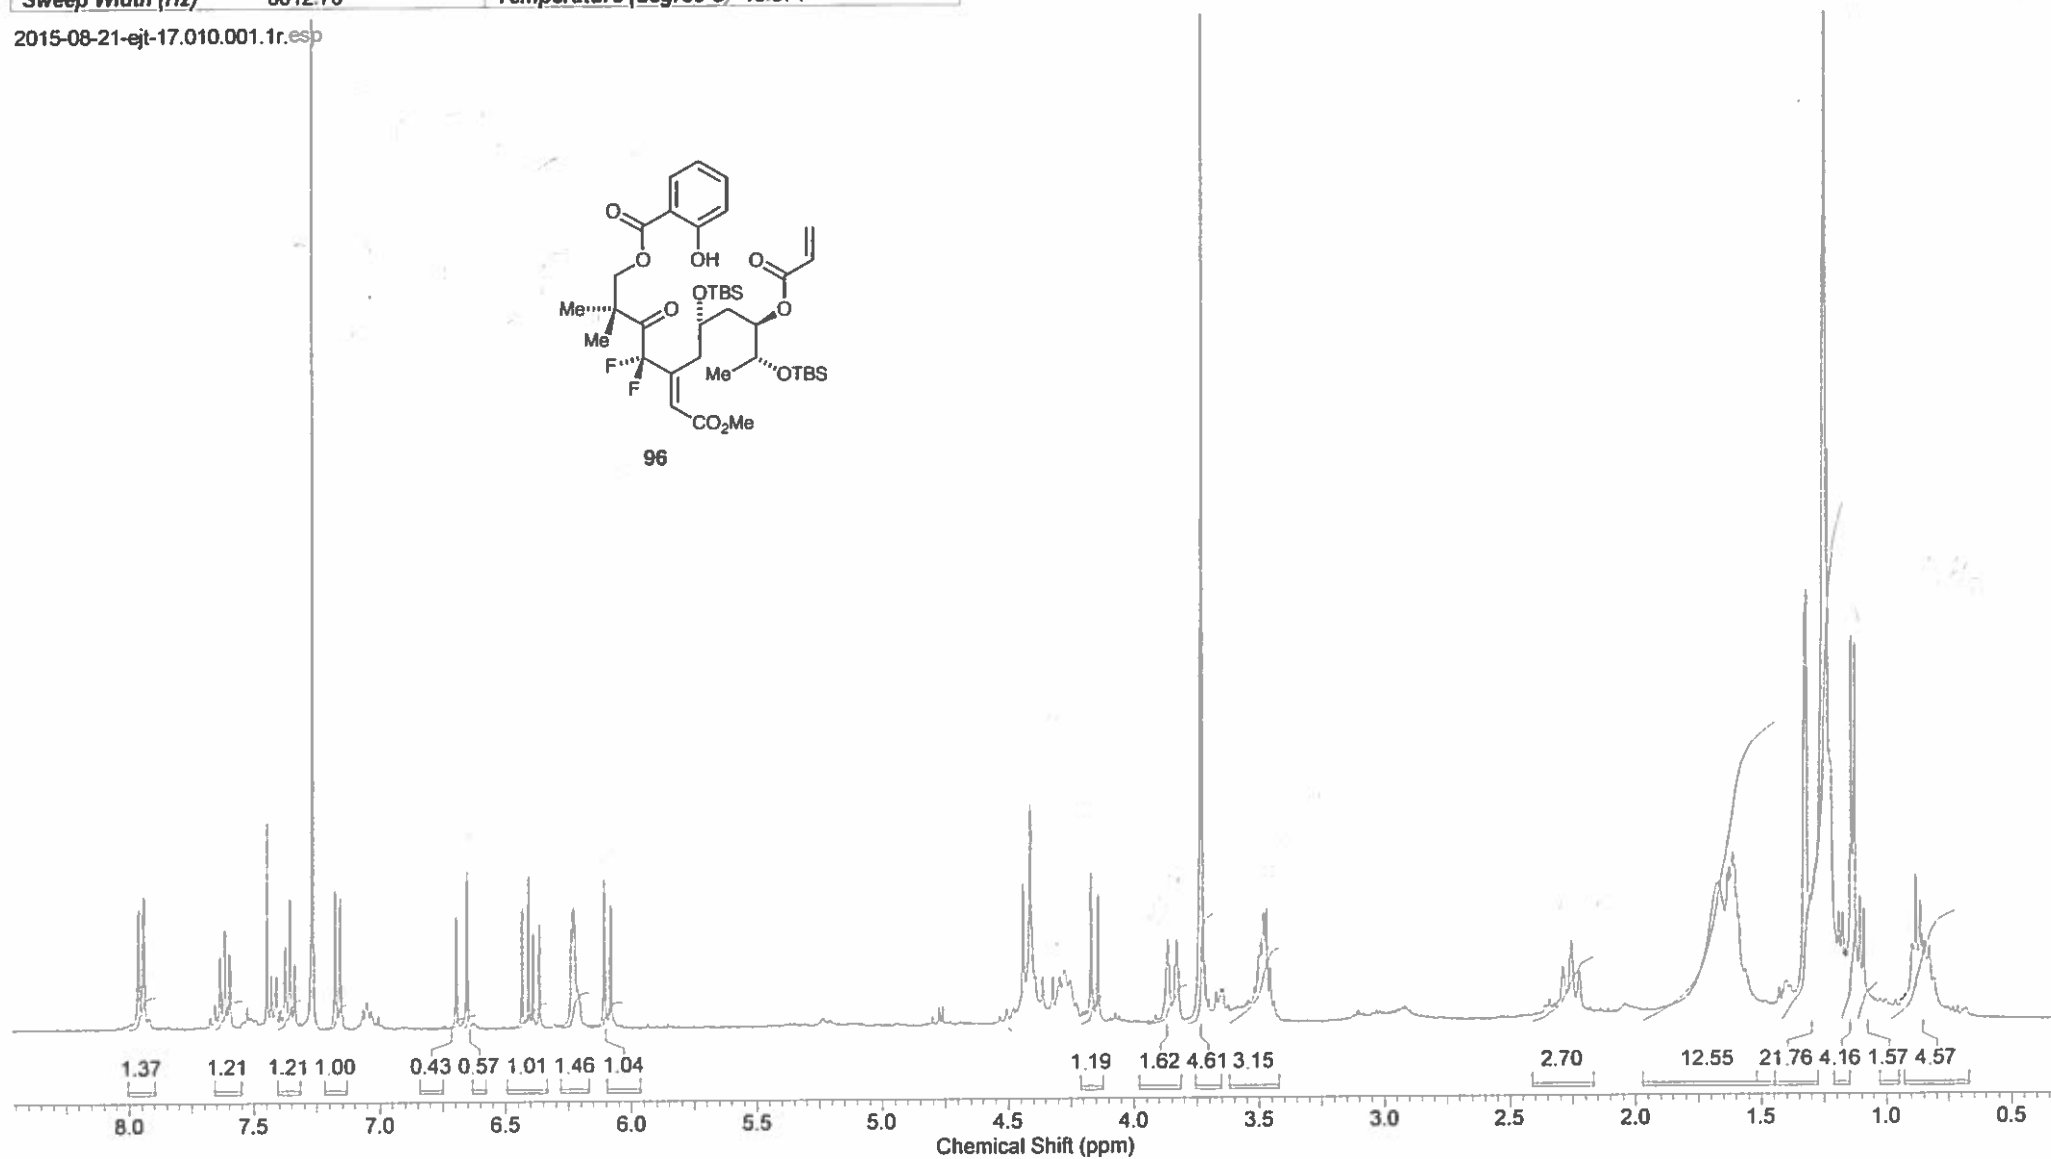

EJT-PRM186 f19-32 155mg  
mPROTON\_A CDCl3 {e:\bruk400cdata\2015\Jul} ejt 44

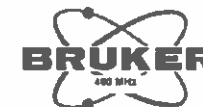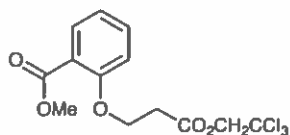

97

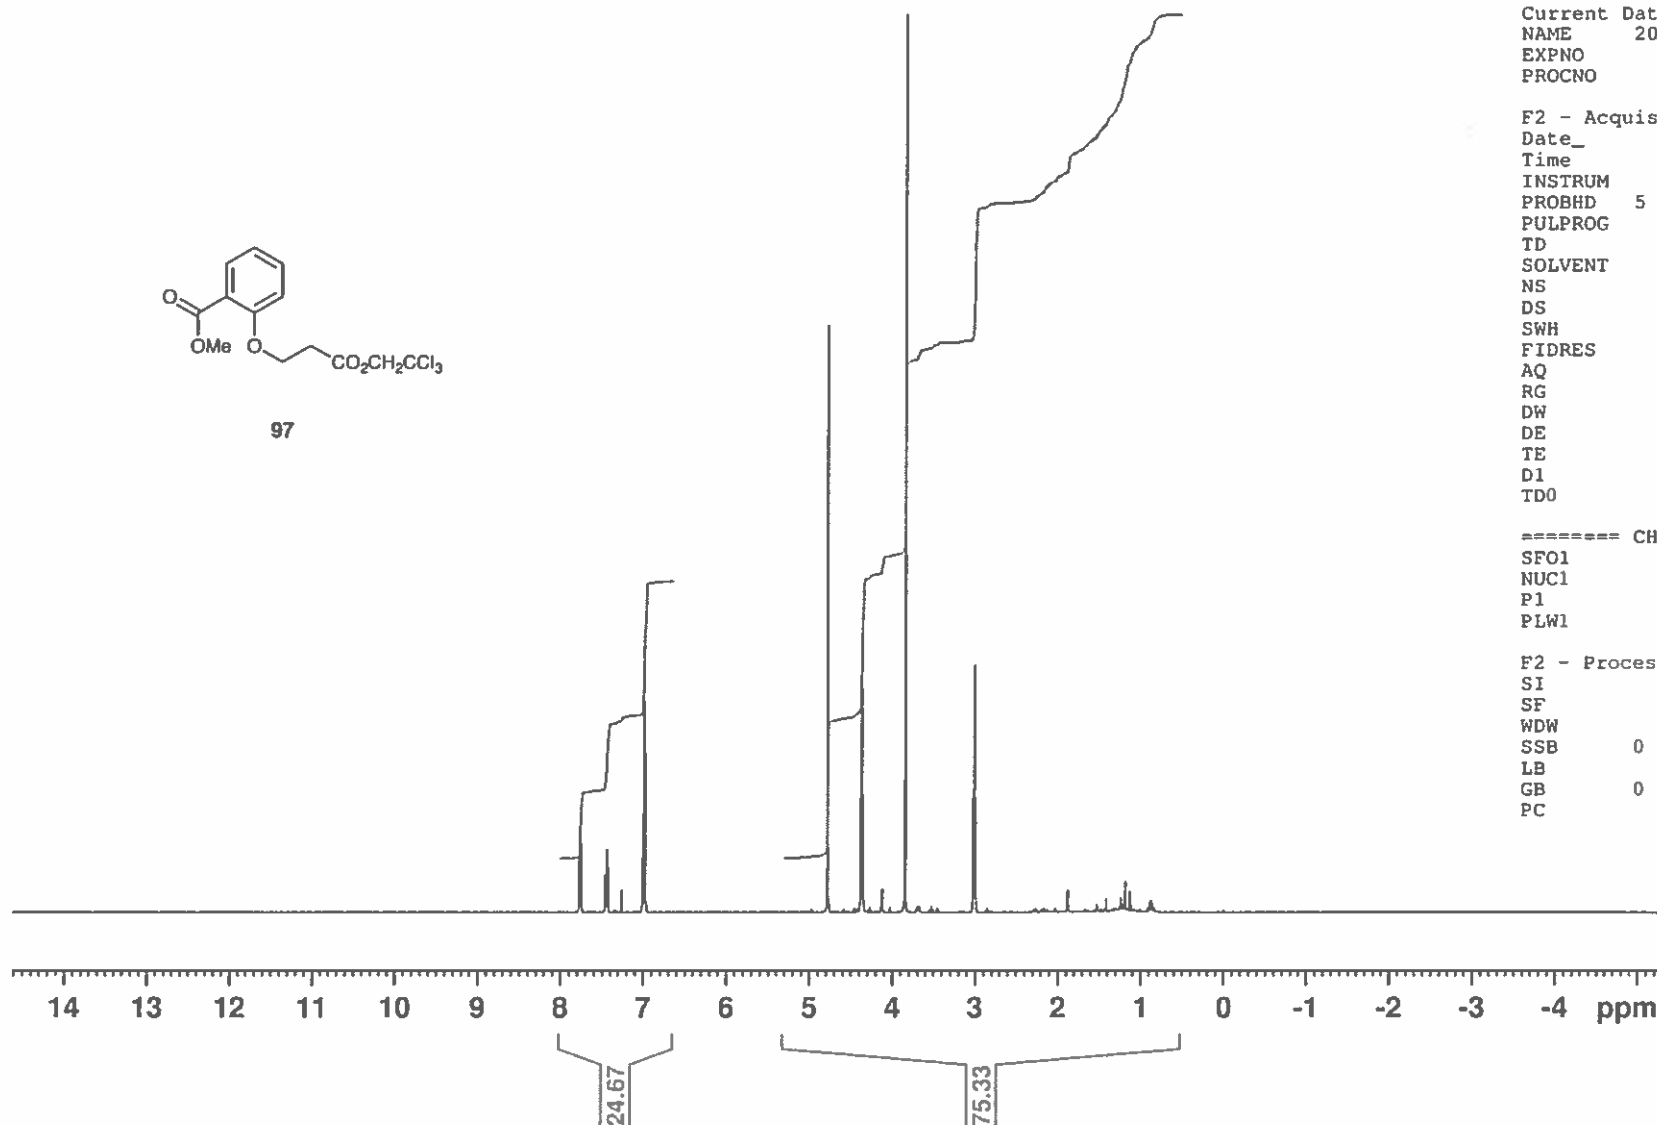

Current Data Parameters  
NAME 2015-07-29-ejt-44  
EXPNO 10  
PROCNO 1

F2 - Acquisition Parameters  
Date\_ 20150729  
Time 10.57  
INSTRUM spect  
PROBHD 5 mm CPPBBO BB  
PULPROG zg30  
TD 65536  
SOLVENT CDCl3  
NS 4  
DS 2  
SWH 8012.820 Hz  
FIDRES 0.122266 Hz  
AQ 4.0894465 sec  
RG 32  
DW 62.400 usec  
DE 10.00 usec  
TE 290.5 K  
D1 1.00000000 sec  
TD0 1

===== CHANNEL f1 =====  
SFO1 400.0719003 MHz  
NUC1 1H  
P1 12.00 usec  
PLW1 7.40000010 W

F2 - Processing parameters  
SI 65536  
SF 400.0700087 MHz  
WDW EM  
SSB 0  
LB 0.30 Hz  
GB 0  
PC 1.00

EJT-PRM186 f19-32 155mg

mCARBON\_A CDC13 (g:\bruk400\data\2015 Jul) ejt 44

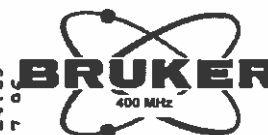

Current Data Parameters  
NAME 2015-07-29-ejt-44  
EXPNO 12  
PROCNO 1

F2 - Acquisition Parameters  
Date\_ 20150729  
Time 11.09  
INSTRUM spect  
PROBHD 5 mm CPPBBO BB  
PULPROG zgpg30  
TD 65536  
SOLVENT CDC13  
NS 128  
DS 4  
SWH 24038.461 Hz  
FIDRES 0.366798 Hz  
AQ 1.3631488 sec  
RG 71.8  
DW 20.800 usec  
DE 41.77 usec  
TE 290.5 K  
D1 2.00000000 sec  
D11 0.03000000 sec  
TD0 1

===== CHANNEL f1 =====  
SFO1 100.6077379 MHz  
NUC1 13C  
P1 10.00 usec  
PLW1 33.00000000 W

===== CHANNEL f2 =====  
SFO2 400.0716003 MHz  
NUC2 1H  
CPDPRG2 waltz16  
PCPD2 80.00 usec  
PLW2 7.40000010 W  
PLW12 0.17209999 W  
PLW13 0.11014000 W

F2 - Processing parameters  
SI 32768  
SF 100.5976815 MHz  
WDW EM  
SSB 0  
LB 1.00 Hz  
GB 0  
PC 1.40

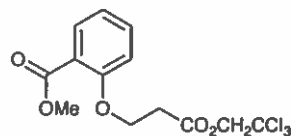

97

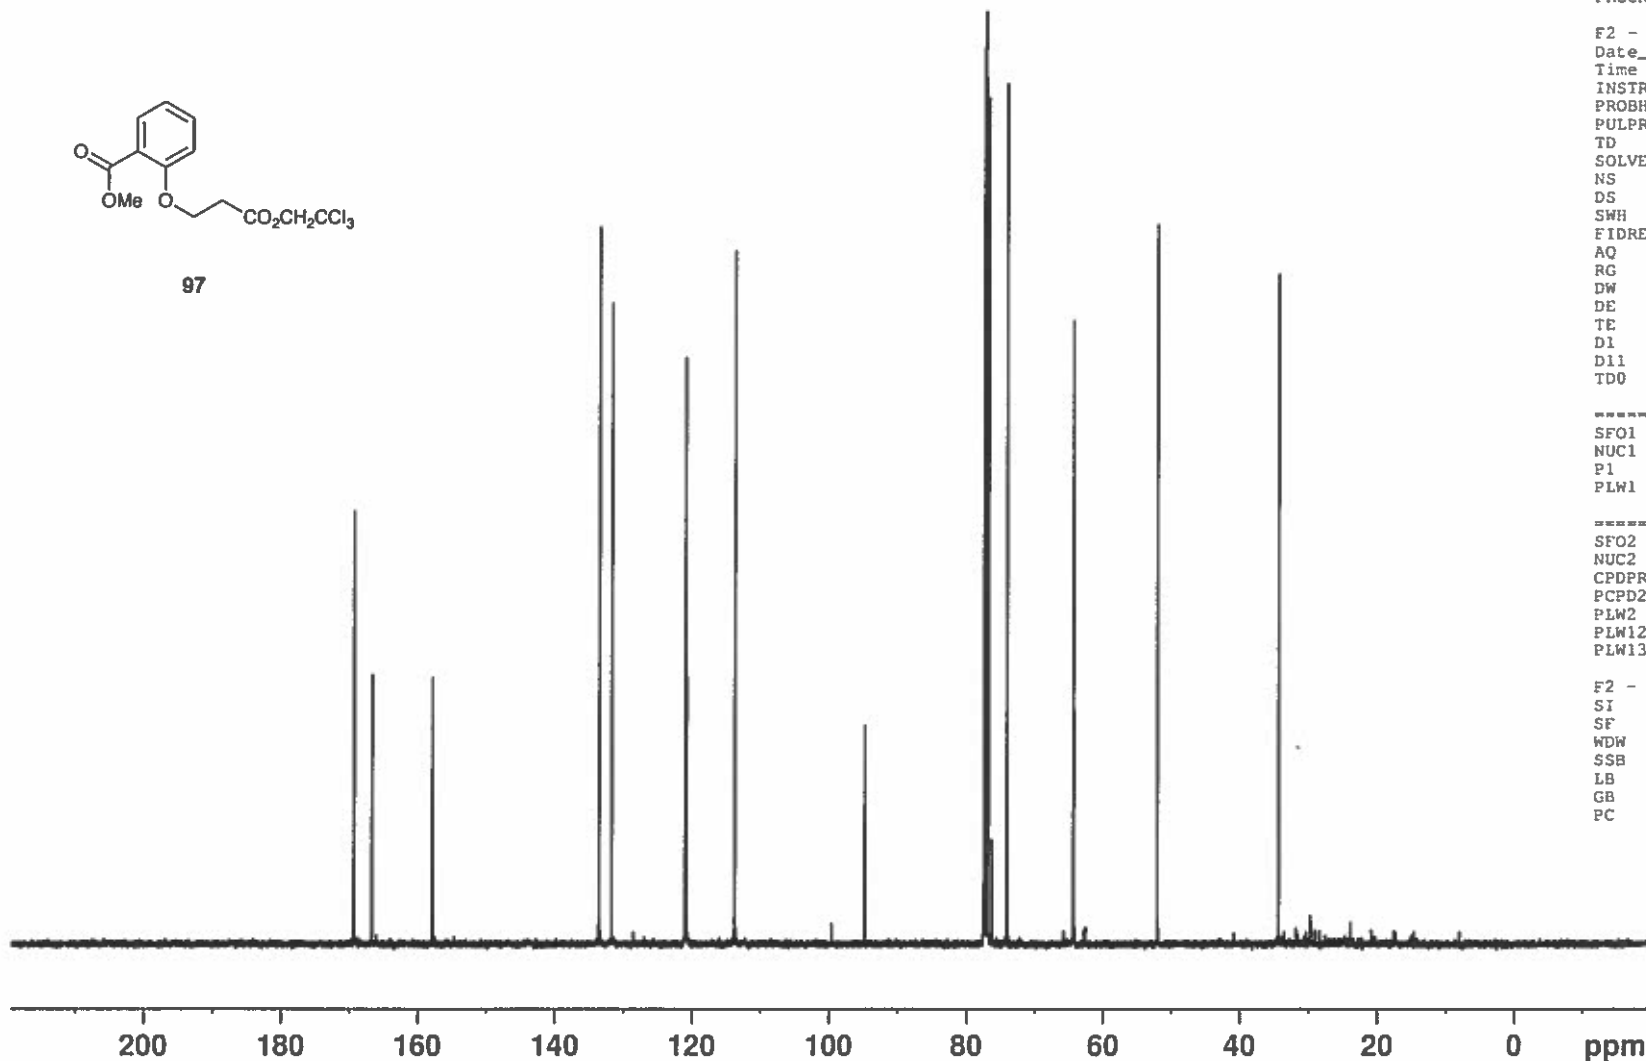

EJT-PRM187 f22-29 14mg  
mPROTON\_A CDCI3 {e:\bruk400cdata\2015\Jul} ejt 21

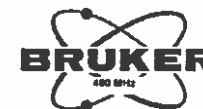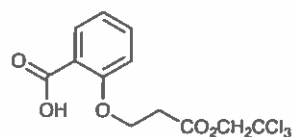

98

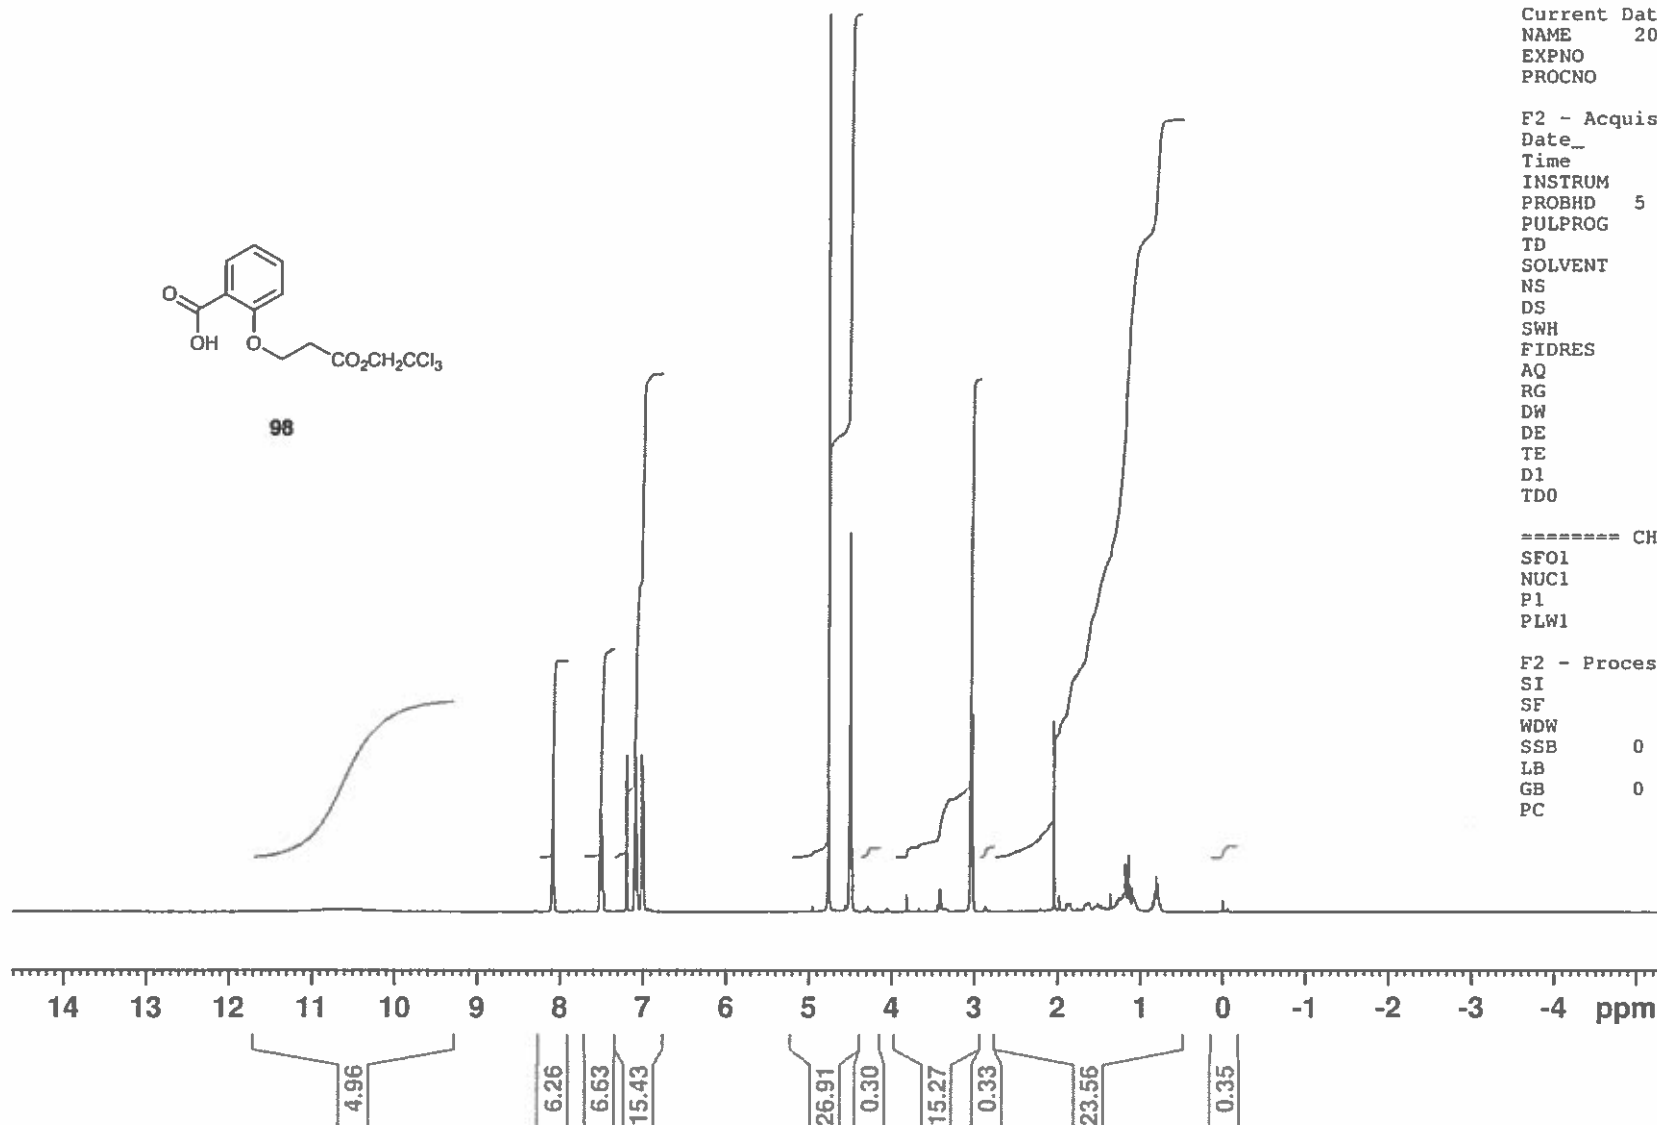

Current Data Parameters  
NAME 2015-07-31-ejt-21  
EXPNO 10  
PROCNO 1

F2 - Acquisition Parameters  
Date\_ 20150731  
Time 11.22  
INSTRUM spect  
PROBHD 5 mm CPPBBO BB  
PULPROG zg30  
TD 65536  
SOLVENT CDCl3  
NS 4  
DS 2  
SWH 8012.820 Hz  
FIDRES 0.122266 Hz  
AQ 4.0894465 sec  
RG 203  
DW 62.400 usec  
DE 10.00 usec  
TE 290.5 K  
D1 1.00000000 sec  
TD0 1

===== CHANNEL f1 =====  
SF01 400.0719003 MHz  
NUC1 1H  
P1 12.00 usec  
PLW1 7.40000010 W

F2 - Processing parameters  
SI 65536  
SF 400.0700350 MHz  
WDW EM  
SSB 0  
LB 0.30 Hz  
GB 0  
PC 1.00



EJT-PRM187 f22-29 14mg  
mCARBON\_A CDCl3 (e:\bruk400\data\2015\jul) ejt 21

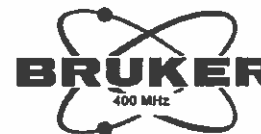

Current Data Parameters  
NAME 2015-07-31-ejt-21  
EXPNO 11  
PROCNO 1

F2 - Acquisition Parameters  
Date\_ 20150731  
Time 11.27  
INSTRUM spect  
PROBHD 5 mm CPMBO BB  
PULPROG zgpg30  
TD 65536  
SOLVENT CDCl3  
NS 64  
DS 4  
SWH 24038.461 Hz  
FIDRES 0.366798 Hz  
AQ 1.3631488 sec  
RG 71.8  
DW 20.800 usec  
DE 41.77 usec  
TE 290.4 K  
D1 2.00000000 sec  
D11 0.03000000 sec  
TD0 1

===== CHANNEL f1 =====  
SFO1 100.6077379 MHz  
NUC1 13C  
P1 10.00 usec  
PLW1 33.00000000 W

===== CHANNEL f2 =====  
SFO2 400.0716003 MHz  
NUC2 1H  
CPDPRG[2] waltz16  
PCPD2 80.00 usec  
PLW2 7.40000010 W  
PLW12 0.17209999 W  
PLW13 0.11014000 W

F2 - Processing parameters  
SI 32768  
SF 100.5976815 MHz  
WDW EM  
SSB 0  
LB 1.00 Hz  
GB 0  
PC 1.40

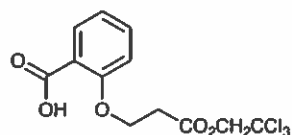

98

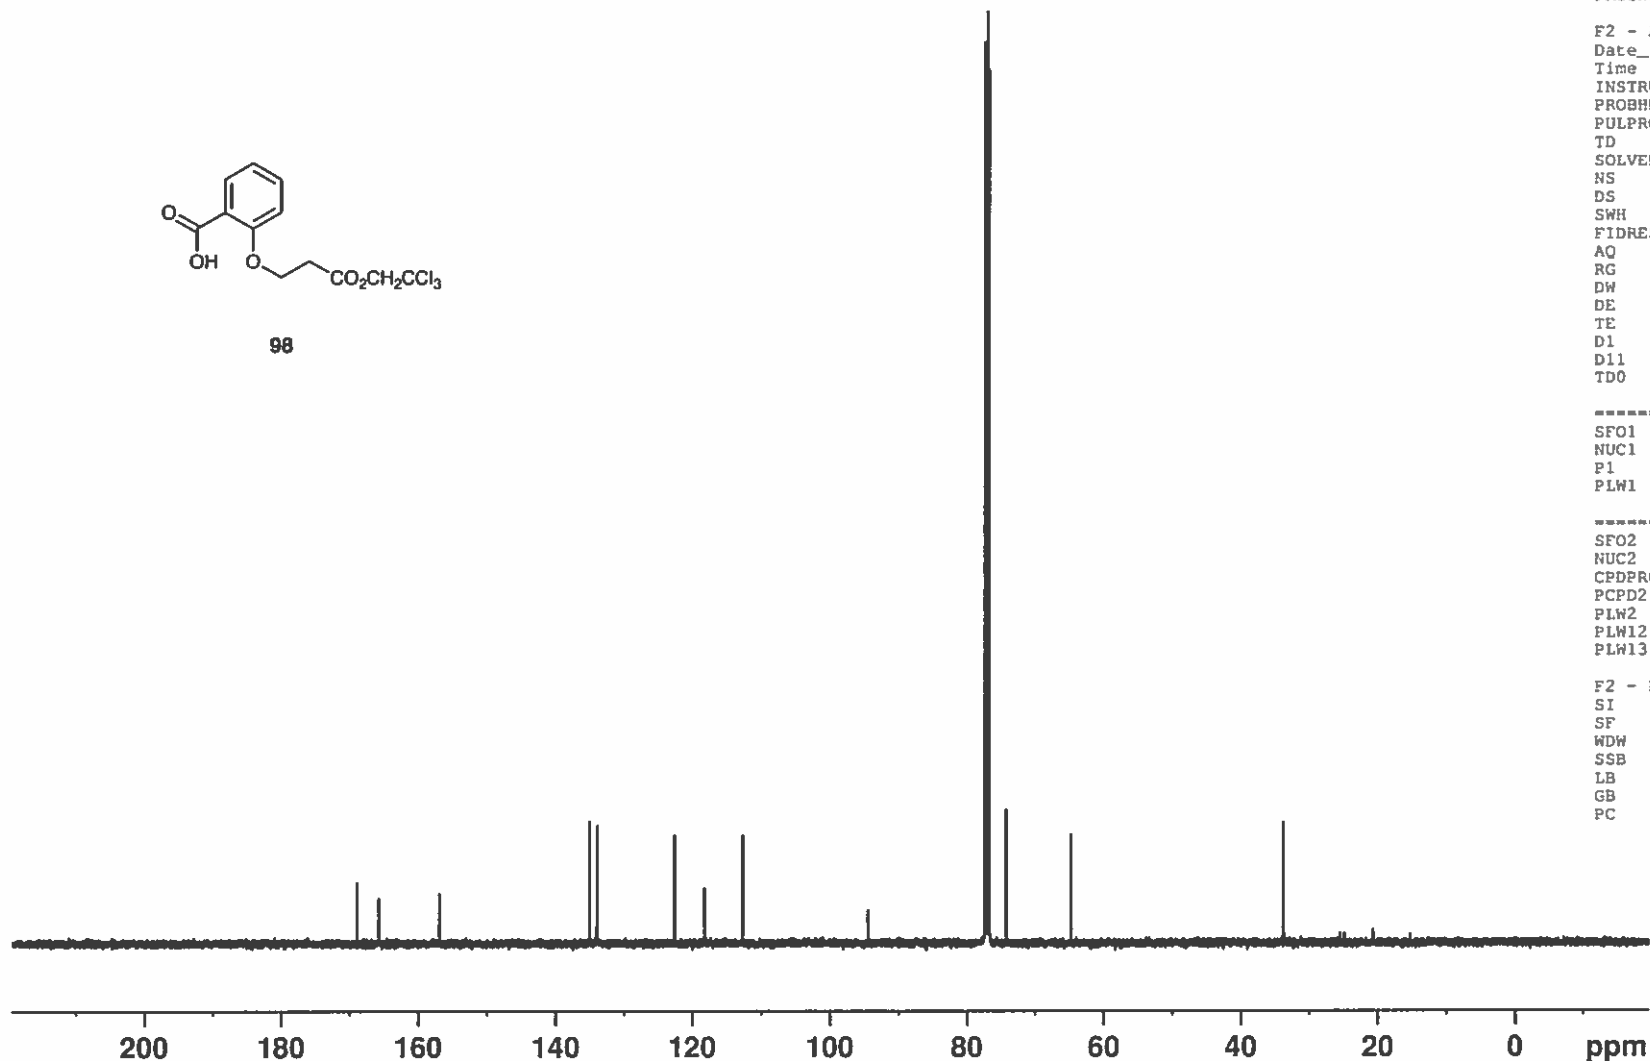

Supplement: c8ob03152e1.pdf [file c8ob03152e1.pdf]
